# Supplementary material for: The cooperative binding of TDP-43 to GU-rich RNA repeats antagonizes TDP-43 aggregation
Source: PubMed Central journal article supplement (PMC8523171; doi:10.7554/elife.67605), 2021-09-07
Supplement: elife-67605-supp5.pdf [file elife-67605-supp5.pdf]

Vandana Joshi  
UNIVERSITE EVRY VAL  
D'ESSONNE,  
SABNP/INSERM1204  
Rue Père André Jarlan 91025 EVRY cedex.  
91000, Évry  
France

SOP\_APG\_Zelllinienauthentizität\_A04\_1.0

Report date: 11.08.2021

**Certificate**  
**Cell Line Authentication Test**  
**Order ID: 11107530406**

**Method:**

DNA isolation was carried out from cell pellet (cell layer).

Genetic characteristics were determined by PCR-single-locus-technology.

16 independent PCR-systems D8S1179, D21S11, D7S820, CSF1PO, D3S1358, TH01, D13S317, D16S539, D2S1338, AMEL, D5S818, FGA, D19S433, vWA, TPOX and D18S51 were investigated.

(ASN-0002 core markers are colored grey, Thermo Fisher, AmpFISTR® Identifier® Plus PCR Amplification Kit)

In parallel, positive and negative controls were carried out yielding correct results.

**Result:**

| Client Sample Name   | Hela-1     | Hela-2     | Hela-3     |
|----------------------|------------|------------|------------|
| <b>Sample Code</b>   | CL00005845 | CL00005846 | CL00005847 |
| D8S1179              | 12,13      | 12,13      | 12,13      |
| D21S11               | 27,28      | 27,28      | 27,28      |
| D7S820               | 8,12       | 8,12       | 8,12       |
| CSF1PO               | 9,10       | 9,10       | 9,10       |
| D3S1358              | 15,18      | 15,18      | 15,18      |
| TH01                 | 7,7        | 7,7        | 7,7        |
| D13S317              | 12,13,3    | 12,13,3    | 12,13,3    |
| D16S539              | 9,10       | 9,10       | 9,10       |
| D2S1338              | 17,17      | 17,17      | 17,17      |
| D19S433              | 13,14      | 13,14      | 13,14      |
| vWA                  | 16,18      | 16,18      | 16,18      |
| TPOX                 | 8,12       | 8,12       | 8,12       |
| D18S51               | 16,16      | 16,16      | 16,16      |
| AMEL                 | X,X        | X,X        | X,X        |
| D5S818               | 11,12      | 11,12      | 11,12      |
| FGA                  | 21,21      | 21,21      | 21,21      |
| <b>Database Name</b> | HELA       | HELA       | HELA       |

The table shows the result of the cell line analysis and the comparison with the online database of the DSMZ (<http://www.dsmz.de/de/service/services-human-and-animal-cell>) and the Cellosaurus database (<https://web.expasy.org/cellosaurus>). Please note that only the PCR-systems according to ANSI/ATCC standard ASN-0002 were aligned (D5S818, D13S317, D7S820, D16S539, VWA, TH01, TPOX, CSF1PO, AMEL - colored grey).

This report was created automatically and is therefore valid without a signature.

**Eurofins Genomics Europe**  
**Applied Genomics GmbH**  
Anzinger Straße 7 a  
85560 Ebersberg  
Germany

Tel.: +49 8092 8289-200  
Fax: +49 8092 8289-201

Email: [info-eu@eurofins.com](mailto:info-eu@eurofins.com)  
Web: [eurofinsgenomics.com](http://eurofinsgenomics.com)

Managing Directors: Dr. Michael Hadem,  
Dr. Peter Persigehl

Register Court Munich HRB 207710  
VAT ID: DE815473648

HypoVereinsbank

IBAN: DE23 2073 0017 7000 0006 50  
SWIFT: HYVEDEMM17
