# Supplementary material for: The cooperative binding of TDP-43 to GU-rich RNA repeats antagonizes TDP-43 aggregation
Source: eLife. 2021 Sep 7;10:e67605. doi: 10.7554/eLife.67605 (PMC8523171; doi:10.7554/eLife.67605)
Supplement: Figure 1—figure supplement 2—source data 1. [file elife-67605-fig1-figsupp2-data1.xlsx]

## Sheet: RRM1-2;(GT)3
RRM1-2 + (GT)3
No	Molar Ratio	DeltaH (Kcal/mol)
2	0.0819118	-16.0376
3	0.15053	-16.2154
4	0.21947	-16.2104
5	0.28874	-16.099
6	0.35833	-16.0041
7	0.42824	-15.8731
8	0.49848	-15.8209
9	0.56905	-15.6792
10	0.63993	-15.3778
11	0.71115	-14.9557
12	0.78268	-14.7488
13	0.85454	-14.1554
14	0.92673	-13.755
15	0.99924	-13.4286
16	1.07207	-12.9567
17	1.14523	-12.4199
18	1.21871	-11.7233
19	1.29252	-11.1062
20	1.36665	-10.7263
21	1.44111	-10.1887
22	1.51589	-9.92247
23	1.59099	-9.19473
24	1.66642	-8.66369
25	1.74217	-8.12941
26	1.81825	-7.62863
27	1.89465	-7.08579
28	1.97138	-6.69362
29	2.04842	-5.89669
30	2.1258	-5.62338
31	2.2035	-5.23909
32	2.28152	-4.85754
33	2.35987	-4.66701
34	2.43854	-4.12179
35	2.51753	-3.76684
36	2.59685	-3.56824
37	2.6765	-3.50588
38	2.75647	-3.48415
39	2.83676	-3.34301

## Sheet: RRM1-2;(GT)6
RRM1-2 + (GT)6
No	Molar Ratio	DeltaH (Kcal/mol)
2	0.0559048	-32.8277
3	0.10274	-32.3281
4	0.14979	-31.943
5	0.19706	-31.7241
6	0.24456	-31.3484
7	0.29228	-31.2345
8	0.34021	-31.0438
9	0.38837	-30.8026
10	0.43676	-30.5147
11	0.48536	-30.5365
12	0.53418	-30.2443
13	0.58323	-29.8879
14	0.63249	-29.8439
15	0.68198	-29.2785
16	0.73169	-28.3972
17	0.78162	-28.0624
18	0.83177	-27.6445
19	0.88214	-26.2681
20	0.93274	-24.3871
21	0.98356	-20.1599
22	1.03459	-13.0172
23	1.08585	-7.56452
24	1.13733	-4.64069
25	1.18903	-3.67671
26	1.24095	-2.87142
27	1.2931	-2.63776
28	1.34546	-2.31913
29	1.39805	-2.16986
30	1.45086	-1.98769
31	1.50389	-2.09077
32	1.55714	-2.07944
33	1.61061	-1.8049
34	1.6643	-1.78919
35	1.71822	-1.67257
36	1.77235	-1.45191

## Sheet: RRM1-2;(GT)12
RRM1-2 + (GT)12
No	Molar Ratio	DeltaH (Kcal/mol)
2	0.0347613	-78.7139
3	0.063881	-78.1366
4	0.0931383	-77.266
5	0.12253	-76.8958
6	0.15207	-75.4614
7	0.18174	-74.4653
8	0.21154	-73.1365
9	0.24149	-71.6413
10	0.27157	-69.8192
11	0.30179	-66.4015
12	0.33215	-62.4553
13	0.36265	-57.0014
14	0.39328	-45.9571
15	0.42405	-30.891
16	0.45496	-22.2291
17	0.48601	-19.5308
18	0.51719	-17.9664
19	0.54851	-17.1369
20	0.57997	-16.2662
21	0.61157	-15.7712
22	0.6433	-15.604
23	0.67518	-15.0872
24	0.70719	-14.3358
25	0.73933	-13.2286
26	0.77162	-10.5647
27	0.80404	-6.8087
28	0.8366	-3.69606
29	0.8693	-2.30156
30	0.90214	-1.87735
31	0.93511	-1.4197
32	0.96822	-1.53195
33	1.00147	-1.49111
34	1.03485	-1.19593
35	1.06838	-1.11775
36	1.10204	-1.1465

## Sheet: RRM1; (GT)3
RRM1 + (GT)3
No	Molar Ratio	DeltaH (Kcal/mol)
2	0.0627428	-17.6546
3	0.10782	-17.7423
4	0.1531	-17.5297
5	0.1986	-17.4316
6	0.24431	-17.1803
7	0.29024	-16.7939
8	0.33637	-16.5135
9	0.38272	-15.7272
10	0.42929	-15.0828
11	0.47606	-14.1885
12	0.52305	-13.2488
13	0.57025	-12.215
14	0.61767	-10.9531
15	0.66529	-9.77123
16	0.71313	-8.7257
17	0.76118	-7.42508
18	0.80945	-6.35325
19	0.85793	-5.64086
20	0.90662	-4.99791
21	0.95552	-4.21507
22	1.00464	-3.80111
23	1.05397	-3.51547
24	1.10351	-3.2151
25	1.15327	-2.93814
26	1.20324	-2.87994
27	1.25342	-2.8161
28	1.30381	-2.66762
29	1.35442	-2.59184
30	1.40524	-2.43994
31	1.45627	-2.24457
32	1.50751	-2.23011
33	1.55897	-2.06264
34	1.61064	-1.91506
35	1.66252	-1.79412
36	1.71462	-1.65544
37	1.76693	-1.61333
38	1.81945	-1.39549
39	1.87219	-1.31524

## Sheet: RRM1; (GT)6
RRM1 + (GT)6
No	Molar Ratio	DeltaH (Kcal/mol)
2	0.0505926	-36.617
3	0.0929742	-35.7486
4	0.13556	-33.8893
5	0.17834	-32.5639
6	0.22132	-30.9548
7	0.2645	-28.3446
8	0.30789	-26.5428
9	0.35147	-24.1162
10	0.39525	-21.7011
11	0.43924	-19.2995
12	0.48342	-17.6726
13	0.52781	-16.9909
14	0.57239	-15.4999
15	0.61718	-14.4903
16	0.66216	-12.4942
17	0.70735	-11.1817
18	0.75273	-8.49924
19	0.79832	-6.15326
20	0.84411	-4.2475
21	0.8901	-2.62695
22	0.93628	-1.36887
23	0.98267	-1.37607
24	1.02926	-1.61767
25	1.07605	-1.53679
26	1.12304	-1.60251
27	1.17022	-1.37075
28	1.21761	-1.27668
29	1.2652	-1.21789
30	1.31299	-1.11714
31	1.36098	-1.24408
32	1.40917	-1.30914
33	1.45757	-1.43812
34	1.50616	-1.23735
35	1.55495	-1.33075
36	1.60394	-1.32252
37	1.65313	-1.2663
38	1.70252	-1.04444
39	1.75212	-1.0577

## Sheet: RRM1; (GT)12
RRM1 + (GT)12
No	Molar Ratio	DeltaH (Kcal/mol)
2	0.0229007	-74.482
3	0.0420346	-74.0229
4	0.0612138	-72.5673
5	0.0804385	-71.7035
6	0.0997085	-70.7201
7	0.11902	-69.4958
8	0.13838	-65.6219
9	0.15779	-60.6521
10	0.17724	-54.611
11	0.19674	-47.8267
12	0.21628	-39.0149
13	0.23587	-29.0496
14	0.2555	-22.7679
15	0.27518	-21.0971
16	0.29491	-18.2801
17	0.31468	-13.3382
18	0.33449	-11.2163
19	0.35435	-10.3431
20	0.37426	-8.81949
21	0.39421	-8.08046
22	0.4142	-7.23902
23	0.43424	-6.61935
24	0.45433	-5.88625
25	0.47446	-5.76181
26	0.49464	-4.49425
27	0.51487	-4.47543
28	0.53513	-3.69554
29	0.55545	-3.48018
30	0.57581	-3.18688
31	0.59621	-3.44057
32	0.61666	-3.24231
33	0.63716	-3.19169
34	0.6577	-2.72556
35	0.67829	-1.94737
36	0.69892	-2.36921
37	0.7196	-2.38038
38	0.74032	-1.78067
39	0.76109	-1.94239
40	0.7819	-2.34721
41	0.80276	-1.62206
42	0.82366	-1.10576
43	0.84461	-1.4727
44	0.86561	-1.68615
45	0.88665	-1.22871
46	0.90773	-0.325486
47	0.92887	-0.84394
48	0.95004	-0.866771
49	0.97126	-1.0717
50	0.99253	-0.718317
51	1.01384	-0.578558
52	1.0352	-0.503647

## Sheet: RRM2;(GT)3
RRM2 + (GT)3
No	Molar Ratio	DeltaH (Kcal/mol)
2	0.0537546	-13.6074
3	0.098785	-13.2516
4	0.14403	-12.8703
5	0.18948	-12.4836
6	0.23515	-11.9649
7	0.28103	-11.7318
8	0.32713	-11.4076
9	0.37344	-11.0205
10	0.41996	-10.455
11	0.46669	-9.9907
12	0.51364	-9.69488
13	0.56079	-9.09473
14	0.60817	-8.64509
15	0.65575	-8.08565
16	0.70355	-7.71272
17	0.75156	-7.16723
18	0.79978	-6.55432
19	0.84822	-5.92264
20	0.89686	-5.54512
21	0.94573	-5.02989
22	0.9948	-4.49753
23	1.04409	-3.98043
24	1.09359	-3.59946
25	1.1433	-3.3235
26	1.19323	-2.99902
27	1.24336	-2.79933
28	1.29371	-2.67253
29	1.34428	-2.42143
30	1.39506	-2.35994
31	1.44605	-2.26599
32	1.49725	-2.29714
33	1.54866	-2.21801
34	1.60029	-2.18182
35	1.65213	-2.13316
36	1.70419	-2.16037
37	1.75645	-2.14164
38	1.80893	-2.09062
39	1.86162	-2.09235

## Sheet: RRM2;(GT)6
RRM2 + (GT)6
No	Molar Ratio	DeltaH (Kcal/mol)
2	0.0505926	-27.7572
3	0.0929742	-26.3539
4	0.13556	-24.488
5	0.17834	-22.0478
6	0.22132	-20.1793
7	0.2645	-17.2469
8	0.30789	-14.5757
9	0.35147	-13.5746
10	0.39525	-11.4604
11	0.43924	-8.82937
12	0.48342	-6.52965
13	0.52781	-5.0872
14	0.57239	-3.95739
15	0.61718	-3.19305
16	0.66216	-2.78441
17	0.70735	-2.19289
18	0.75273	-1.94703
19	0.79832	-1.6804
20	0.84411	-1.43245
21	0.8901	-1.39409
22	0.93628	-1.29576
23	0.98267	-1.12169
24	1.02926	-1.13419
25	1.07605	-0.972654
26	1.12304	-0.843248
27	1.17022	-0.803635
28	1.21761	-0.804324
29	1.2652	-0.857633
30	1.31299	-0.880513
31	1.36098	-0.738166
32	1.40917	-0.761275
33	1.45757	-0.683286
34	1.50616	-0.834129
35	1.55495	-0.74621
36	1.60394	-0.797964
37	1.65313	-0.881603
38	1.70252	-0.839692
39	1.75212	-0.735328

## Sheet: RRM2;(GT)12
RRM2 + (GT)12
No	Molar Ratio	DeltaH (Kcal/mol)
2	0.0180795	-64.0558
3	0.0331852	-61.787
4	0.0483267	-58.3973
5	0.0635041	-55.9561
6	0.0787173	-55.0206
7	0.0939663	-49.7079
8	0.10925	-45.1128
9	0.12457	-39.1379
10	0.13993	-33.9362
11	0.15532	-29.0999
12	0.17075	-25.3976
13	0.18621	-24.1426
14	0.20171	-22.6743
15	0.21725	-18.3624
16	0.23282	-15.2412
17	0.24843	-13.2769
18	0.26407	-10.8801
19	0.27975	-8.87883
20	0.29547	-6.73775
21	0.31122	-5.09121
22	0.327	-4.01498
23	0.34282	-3.90744
24	0.35868	-3.5365
25	0.37458	-3.1672
26	0.39051	-2.89379
27	0.40647	-2.52711
28	0.42247	-2.76232
29	0.43851	-2.51435
30	0.45459	-1.98282
31	0.47069	-2.24064
32	0.48684	-2.1095
33	0.50302	-2.13947
34	0.51924	-2.06492
35	0.53549	-1.5623
36	0.55178	-1.74599
37	0.5681	-1.4217
38	0.58446	-1.4941
39	0.60086	-1.37123
40	0.61729	-1.73054
41	0.63376	-1.2166
42	0.65026	-1.54886
43	0.6668	-0.99482
44	0.68337	-1.53796
45	0.69999	-0.78246
46	0.71663	-0.600702
47	0.73331	-1.14856
48	0.75003	-0.555595
49	0.76679	-0.785655
50	0.78358	-0.289786
51	0.8004	-1.04349
52	0.81727	-0.951134
53	0.83416	-1.27013
54	0.8511	-0.503115
55	0.86807	-0.744177
56	0.88507	-0.811796
57	0.90211	-0.939819
58	0.91919	-0.794506
