# Supplementary material for: The cooperative binding of TDP-43 to GU-rich RNA repeats antagonizes TDP-43 aggregation
Source: eLife. 2021 Sep 7;10:e67605. doi: 10.7554/eLife.67605 (PMC8523171; doi:10.7554/eLife.67605)
Supplement: Figure 2—figure supplement 2—source data 1. [file elife-67605-fig2-figsupp2-data1.xlsx]

## Sheet: RRM1-2  (GU)12 (GU)6 ratio
Peak broadenings
	Peak Intensity
Residue #	(GU)6	(GU)12	Ratio [(GU)12/(GU)6]
101	668892	444617	0.664706			Arbitrary value for not assigned residues
102	83978.6	49414.4	0.588416
103	38088.6	20207.7	0.530543
104	164124	62551.1	0.381122
105	93795.6	48087.5	0.512684
106	109789	36215.8	0.329866
107	60394.1	21597.2	0.357603
108	71772.8	28290.1	0.394162
109	87995.6	37032.5	0.420845
110	58065.7	26407	0.454777
111	109033	33065.9	0.303263
112	1	1	1
113	79450.8	21729.4	0.273495
114	193599	80300.3	0.414776
115	230665	103049	0.446747
116	93653.4	55592.4	0.593597
117	125294	54820.6	0.437537
118	208315	119879	0.57547
119	161417	75302.1	0.466508
120	207092	121621	0.587279
121	164709	67455.9	0.409547
122	324505	204491	0.630162
123	151398	69914.3	0.461793
124	74046.4	28190.9	0.380719
125	197826	101380	0.51247
126	190656	155795	0.817154
127	96171.5	107828	1.1212
128	265391	132474	0.499165
129	274199	138491	0.505074
130	56926.7	14121.3	0.24806
131	128387	50217.4	0.391142
132	88816	30145.4	0.339414
133	155493	87288.1	0.561363
134	117329	63264.7	0.539209
135	166669	71434.3	0.428599
136	19579.8	10875.3	0.555437
137	185116	130127	0.702948
138	127650	73996.2	0.579678
139	151125	99151	0.656087
140	190394	113848	0.59796
141	85913.8	31686.6	0.368819
142	155776	63752.5	0.409257
143	183966	64836.5	0.352438
144	172763	78586.1	0.454878
145	67963.6	26207.6	0.385613
146	59850.1	32493.2	0.542909
147	218010	95522.6	0.438156
148	86412.3	36356.5	0.420732
149	110649	44806.5	0.404942
150	100123	42381.2	0.423293
151	116254	56766.9	0.4883
152	68095.3	32919.3	0.48343
153	292928	155892	0.532187
154	142867	60326.5	0.422257
155	75711.9	30202.3	0.398911
156	268553	115359	0.429559
157	242942	103748	0.427051
158	106170	44043.2	0.414835
159	160377	73825.3	0.460323
160	209845	107159	0.510658
161	91075.6	59760.1	0.656159
162	116557	63342.5	0.543447
163	324764	180925	0.557097
164	293137	144952	0.494487
165	208961	97369	0.465969
166	115894	46382	0.400211
167	210804	81457.4	0.386412
168	22130	15813.4	0.714566
169	171636	71069.4	0.414071
170	147916	61369.3	0.414892
171	210052	86658.9	0.412558
172	168402	136928	0.813101
173	103609	41737.4	0.402836
174	108146	52865.3	0.488832
175	131282	63267	0.481915
176	140178	63217.9	0.450982
177	245118	101238	0.413017
178	1	1	1
179	383905	322633	0.840399
180	91222.2	40230.1	0.441013
181	17597.3	12581.3	0.714956
182	224695	227404	1.01206
183	516934	279818	0.541304
184	317123	292982	0.923873
185	240595	229092	0.952188
186	132965	209522	1.57576
187	1	1	1
188	122771	66802.8	0.544126
189	85281.6	43426	0.509207
190	238757	149050	0.624273
191	89615.8	100372	1.12002
192	239479	193599	0.808415
193	58298	22864.3	0.392197
194	131003	45099.7	0.344265
195	35359.1	11988.5	0.339049
196	58673.5	20996.9	0.357861
197	263093	318606	1.211
198	14013.2	15001.6	1.07053
199	122581	57466.4	0.468805
200	11505.1	73.631	0.00639987
201	120321	56551	0.470001
202	59487.7	1622.29	0.027271
203	230099	97011.7	0.421609
204	100980	49186.1	0.487087
205	200076	147780	0.73862
206	142878	63997.7	0.44792
207	370391	198796	0.536719
208	149659	50430.1	0.336967
209	206724	174762	0.845386
210	217505	136280	0.626557
211	107861	40045.4	0.371269
212	145777	92295	0.633124
213	169246	81238.2	0.480002
214	42675.2	28685.4	0.67218
215	218603	103287	0.472489
216	260373	121948	0.468359
217	185189	82957.9	0.447965
218	181692	86376.2	0.4754
219	134210	45469.7	0.338796
220	29375.4	13309.4	0.453078
221	71690.1	35026.7	0.488585
222	29334.5	8831.23	0.301053
223	1	1	1
224	378307	410013	1.08381
225	1	1	1
226	399832	209850	0.524846
227	49183.5	31643.5	0.643377
228	1	1	1
229	1	1	1
230	190734	93022.2	0.487706
231	54990.8	25695.7	0.467274
232	62714.3	15152.2	0.241607
233	147468	49138.1	0.333212
234	70226.8	28938.8	0.412077
235	179270	136549	0.761691
236	306527	334144	1.0901
237	26406.2	13378.8	0.506656
238	183289	77520.1	0.422939
239	103107	50386.3	0.488678
240	49578.8	19721	0.397771
241	132329	62883.9	0.475209
242	170879	84488.1	0.494432
243	159430	16815.7	0.105474
244	82385.5	31333.5	0.380327
245	53966.6	22590.4	0.4186
246	124676	53946.5	0.432692
247	192251	104634	0.544259
248	141049	55810.1	0.395679
249	264668	168336	0.636025
250	106796	33993.7	0.318304
251	69461.9	38183.9	0.549709
252	171793	71304.1	0.415059
253	102593	39457.7	0.384603
254	129093	65961.2	0.510958
255	65491.2	24727.5	0.377569
256	73983	44004	0.594785
257	151537	59657.5	0.393683
258	66251.7	25109.2	0.378996
259	181084	58118.1	0.320946
260	10364.2	4107.43	0.39631
261	53246.8	23846.1	0.447841
262	1	1	1
263	921421	595940	0.646762
264	1	1	1
265	61815.9	29635.5	0.479415
266	124992	138547	1.10844
267	154624	95320.4	0.616464
268	107272	74751.1	0.696835
269	43442	21784	0.50145
