# Supplementary material for: The cooperative binding of TDP-43 to GU-rich RNA repeats antagonizes TDP-43 aggregation
Source: eLife. 2021 Sep 7;10:e67605. doi: 10.7554/eLife.67605 (PMC8523171; doi:10.7554/eLife.67605)
Supplement: Figure 2—source data 1. [file elife-67605-fig2-data1.xlsx]

## Sheet: Histogramm Fig 2a
	RRM1-2 free			RRM1-2 + (GU)6
Residue #	1H [ppm]	15N [ppm]		1H [ppm]	15N [ppm]	CSP WT ((GU)6 vs Free)
101	8.1983	122.738		8.1665	122.668	0.0325421
102	8.2205	122.287		8.0161	122.782	0.210183			Arbitrary value for not assigned residues
103	8.3302	112.552		8.3149	112.528	0.0154834
104	8.5734	114.568		8.6291	114.39	0.0584238
105	8.401	123.114		8.8219	123.781	0.426045
106	9.1516	121.941		9.183	121.876	0.0320645
107	9.1428	121.501		8.9244	122.292	0.232027
108	8.7064	127.527		8.4599	127.181	0.248857
109	8.9426	125.88		8.8926	125.924	0.0501937
110	8.5532	107.558		7.9762	106.904	0.580622
111	7.4025	117.878		6.8713	116.299	0.553741
112	0	0		0	0	0
113	8.1118	122.069		7.2714	123.297	0.849145
114	7.3805	113.483		8.1081	110.788	0.774954
115	7.1642	118.978		7.51	120.724	0.386614
116	9.199	119.374		9.2375	119.778	0.0555636
117	9.3318	119.911		9.1876	119.99	0.14441
118	8.2546	119.088		8.3015	119.109	0.0469469
119	7.5709	119.585		7.4864	119.448	0.085594
120	8.0599	119.502		8.1061	119.871	0.0588721
121	8.7435	120.816		8.6995	120.585	0.049574
122	8.4018	120.224		8.2883	120.119	0.113975
123	7.9558	118.234		7.8702	117.688	0.101247
124	8.9934	116.813		8.9152	116.563	0.0820138
125	8.2608	115.025		8.2775	115.167	0.0218416
126	7.3669	112.458		7.3585	112.125	0.0340859
127	7.8458	118.728		7.8448	118.588	0.0139249
128	7.5768	105.779		7.591	105.66	0.0184567
129	8.2425	117.385		8.2725	117.537	0.0335356
130	8.9486	127.744		8.829	126.776	0.153248
131	8.9408	127.836		8.8695	126.731	0.130517
132	7.4466	117.97		7.3063	118.052	0.140531
133	8.1828	119.421		8.1673	119.084	0.0367324
134	8.7482	120.956		8.7513	121.406	0.0446555
135	9.0662	124.304		9.0745	125.084	0.0777101
136	8.3134	127.807		8.0152	126.222	0.336948
137	8.4014	122.788		8.5102	122.544	0.111455
138	8.6979	122.054		8.7185	122.014	0.0209715
139	8.8159	128.135		8.9093	128.684	0.108076
140	8.4798	117.724		8.495	117.264	0.0479324
141	8.0736	107.056		8.0673	106.704	0.0354696
142	8.1821	110.205		8.2738	110.572	0.0986458
143	7.8739	118.864		7.8757	119.183	0.0316702
144	0	0		8.1251	117.959	10
145	8.9404	123.353		9.2218	124.046	0.289637
146	9.2659	107.491		9.8366	107.87	0.571932
147	7.3741	112.649		7.2095	111.72	0.188525
148	8.6046	107.027		8.3677	106.966	0.236978
149	9.1674	116.494		9.1802	115.822	0.0676865
150	8.8156	116.829		8.815	116.239	0.0584101
151	8.2605	125.221		8.162	124.601	0.116052
152	9.1475	127.133		9.0971	127.148	0.0504216
153	8.0687	113.654		8.0281	113.546	0.0419716
154	8.5348	118.611		8.4866	118.707	0.0491241
155	9.2288	127.362		9.1839	127.446	0.0456617
156	9.4106	116.635		9.4019	116.649	0.00881602
157	7.0075	115.405		6.9938	115.498	0.0165226
158	7.1499	121.531		7.2098	121.737	0.0632571
159	7.8664	116.378		7.8845	116.993	0.063506
160	7.4366	121.104		7.4504	121.293	0.0232488
161	8.1499	119.234		8.0849	119.242	0.0650044
162	8.1582	117.818		8.0309	117.747	0.127491
163	7.4849	112.207		7.4557	111.912	0.0412905
164	7.3994	116.228		7.3844	116.08	0.0209611
165	8.3539	118.439		8.4248	119.15	0.0998697
166	8.7995	118.268		8.7743	118.369	0.0271184
167	8.8818	128.777		8.8921	128.855	0.0128968
168	8.3536	128.357		8.1639	128.205	0.190293
169	8.6263	124.952		8.5097	124.33	0.131874
170	7.8373	100.665		7.6078	100.455	0.230443
171	7.6461	121.574		7.5317	121.935	0.119852
172	8.5257	121.706		8.2401	122.272	0.291054
173	10.0041	123.914		9.6152	121.082	0.479429
174	8.0459	119.703		8.0549	119.587	0.014629
175	9.512	119.646		9.5497	120.48	0.090735
176	9.0301	121.71		8.8533	121.671	0.176844
177	8.6662	122.889		8.7025	122.856	0.0364458
178	0	0		0	0	0
179	8.6297	118.832		8.2285	121.055	0.457616
180	8.5412	116.411		8.6774	117.192	0.156609
181	8.3713	122.597		8.0258	123.126	0.349454
182	8.2967	120.701		8.1849	120.913	0.113758
183	8.338	116.514		8.337	117.04	0.0520513
184	8.4092	121.632		8.3841	122.431	0.0830123
185	8.2892	121.089		8.2015	122.378	0.154861
186	8.1103	121.828		8.3227	122.292	0.217321
187	0	0		0	0	0
188	8.3375	121.567		8.2516	123.51	0.210621
189	8.2519	121.867		8.3924	123.563	0.218874
190	7.8966	118.826		7.8665	118.799	0.0302167
191	7.8565	125.793		8.5079	120.559	0.83231
192	8.8077	127.342		8.1831	120.682	0.908205
193	9.1385	117.643		9.002	114.989	0.296102
194	9.0743	122.768		8.8701	124.096	0.242886
195	8.9046	126.636		8.1119	126.95	0.79331
196	9.4092	113.328		9.1133	112.17	0.317316
197	8.3217	111.381		8.3934	110.608	0.104908
198	7.1973	113.602		7.1723	114.095	0.054835
199	7.7749	110.139		7.7279	109.409	0.0862223
200	9.0558	121.807		8.8218	122.885	0.257173
201	8.0355	113.614		8.0777	113.195	0.0592276
202	7.1665	119.861		7.1415	120.189	0.0409482
203	8.0886	113.388		8.0712	113.525	0.0220551
204	9.5967	121.115		9.4153	119.997	0.212487
205	8.3778	117.135		8.3733	116.99	0.0150431
206	7.8989	121.041		7.8568	121.035	0.0421042
207	8.2486	120.422		8.1893	119.904	0.0784292
208	8.9742	121.434		8.9512	121.379	0.023638
209	8.424	120.047		8.3164	119.821	0.109909
210	8.1665	119.42		8.1831	119.506	0.0186921
211	8.992	115.647		9.0075	115.65	0.0155037
212	8.2291	116.544		8.2184	116.55	0.0107159
213	7.1109	117.727		7.0884	117.853	0.0257502
214	7.8569	117.219		7.8325	117.595	0.0444405
215	7.6251	104.752		7.6022	105.27	0.0561875
216	8.0995	116.394		8.0886	116.53	0.0172918
217	9.112	127.523		9.08	126.732	0.0845821
218	8.9404	124.888		9.0651	125.699	0.148278
219	7.542	116.198		7.5488	116.391	0.020308
220	8.0178	121.299		8.1007	121.675	0.0908527
221	8.9728	125.489		8.8949	127.466	0.210637
222	8.8603	129.378		8.3772	128.392	0.49286
223	0	0		0	0	0
224	7.9945	119.28		8.0307	120.292	0.106569
225	0	0		0	0	0
226	8.7895	122.032		8.3093	119.362	0.548152
227	8.6474	127.564		8.4672	124.389	0.362301
228	0	0		0	0	0
229	6.5518	111.714		6.3897	112.701	0.189291
230	8.3646	119.552		7.9634	118.224	0.422187
231	9.1858	116.271		8.9503	113.573	0.356077
232	8.7005	123.631		8.7356	124.8	0.120865
233	8.8698	122.603		8.8311	122.067	0.0656589
234	8.9791	126.609		9.3714	128.352	0.428582
235	8.0178	122.627		8.1451	119.757	0.31134
236	0	0		8.3264	116.497	10
237	0	0		8.9233	124.109	10
238	8.4382	117.129		8.7217	119.838	0.390211
239	7.3926	120.536		7.4159	120.892	0.0422481
240	6.9819	121.024		7.2653	121.757	0.292559
241	8.0379	113.403		7.975	113.513	0.0638356
242	7.6348	114.827		7.6351	114.016	0.0802558
243	7.0385	119.945		7.1724	119.778	0.134912
244	7.0454	115.906		7.1817	116.431	0.145883
245	9.0754	113.862		9.0129	114.831	0.114499
246	7.6844	119.252		7.7201	119.309	0.0361386
247	8.2922	119.4		8.3541	119.432	0.0619815
248	8.7207	122.835		8.7175	123.847	0.100234
249	8.1979	120.224		8.1577	120.044	0.0439522
250	8.8142	127.038		8.7928	127.545	0.0546078
251	9.0805	126.131		9.0368	126.194	0.0441344
252	7.8182	101.699		7.823	101.612	0.00992042
253	8.1654	124.586		7.8946	123.113	0.307579
254	8.224	119.077		7.8651	117.159	0.406058
255	9.4698	126.092		9.3945	126.91	0.110622
256	8.0587	117.666		7.8746	117.421	0.185699
257	8.3455	129.617		8.1048	128.214	0.277917
258	9.5571	120.903		9.4993	121.551	0.0863917
259	8.8076	118.917		8.6039	118.23	0.214731
260	8.0111	122.982		8.828	124.672	0.833848
261	8.3312	122.108		8.5758	126.573	0.505203
262	0	0		0	0	0
263	8.259	120.997		8.337	121.418	0.0884175
264	0	0		0	0	0
265	8.2132	125.298		8.1538	124.978	0.0673146
266	8.2519	117.414		8.3681	116.56	0.143718
267	8.37	120.839		8.3996	119.999	0.0883042
268	8.074	120.826		8.1568	121.327	0.0965532
269	8.0088	126.261		8.072	126.427	0.0652941

## Sheet: Histogramm  Fig2b
	RRM1-2 + (GU)6			RRM1-2 + (GU)12
Residue #	1H [ppm]	15N [ppm]		1H [ppm]	15N [ppm]	CSP GU12/GU6
101	8.1665	122.668		8.1534	122.617	0.0140357
102	8.0161	122.782		8.0125	122.705	0.00840311
103	8.3149	112.528		8.3154	112.567	0.0039225
104	8.6291	114.39		8.6288	114.445	0.0055024
105	8.8219	123.781		8.8251	123.79	0.00333533
106	9.183	121.876		9.1864	121.824	0.0061527
107	8.9244	122.292		8.9259	122.38	0.00877147
108	8.4599	127.181		8.4601	127.183	0.000267866
109	8.8926	125.924		8.8732	125.946	0.0195132
110	7.9762	106.904		7.9836	106.823	0.0109478
111	6.8713	116.299		6.8614	116.249	0.0110376
113	7.2714	123.297		7.3004	123.634	0.0442337
114	8.1081	110.788		8.1055	110.709	0.00821329
115	7.51	120.724		7.5093	120.698	0.00268647
116	9.2375	119.778		9.2067	119.728	0.0311999
117	9.1876	119.99		9.1866	119.959	0.00326533
118	8.3015	119.109		8.3015	119.109	0
119	7.4864	119.448		7.4941	119.467	0.00793589
120	8.1061	119.871		8.1088	119.781	0.00927178
121	8.6995	120.585		8.692	120.515	0.0102584
122	8.2883	120.119		8.2883	120.119	0
123	7.8702	117.688		7.8735	117.741	0.0062234
124	8.9152	116.563		8.8875	116.473	0.0291006
125	8.2775	115.167		8.2799	115.191	0.00338407
126	7.3585	112.125		7.3585	112.125	0
127	7.8448	118.588		7.8844	118.496	0.0406294
128	7.591	105.66		7.5937	105.652	0.00283104
129	8.2725	117.537		8.2684	117.558	0.00461044
130	8.829	126.776		8.8252	126.766	0.00394222
131	8.8695	126.731		8.8665	126.704	0.00405774
132	7.3063	118.052		7.3138	118.094	0.00858019
133	8.1673	119.084		8.1673	119.084	0
134	8.7513	121.406		8.7537	121.368	0.0044622
135	9.0745	125.084		9.0792	125.027	0.00735894
136	8.0152	126.222		8.025	126.191	0.0102752
137	8.5102	122.544		8.509	122.529	0.0019015
138	8.7185	122.014		8.7457	121.966	0.0276205
139	8.9093	128.684		8.8933	128.661	0.0161668
140	8.495	117.264		8.4777	117.396	0.0216388
141	8.0673	106.704		7.9751	106.442	0.0957653
142	8.2738	110.572		8.2559	110.53	0.0183721
143	7.8757	119.183		7.8789	119.2	0.00362481
144	8.1251	117.959		8.1208	117.958	0.00430092
145	9.2218	124.046		9.2047	124.126	0.0188491
146	9.8366	107.87		9.7786	107.699	0.0604171
147	7.2095	111.72		7.2079	111.7	0.00254558
148	8.3677	106.966		8.3622	106.97	0.00551353
149	9.1802	115.822		9.1789	115.734	0.00884719
150	8.815	116.239		8.8189	116.255	0.00422824
151	8.162	124.601		8.1591	124.624	0.00369315
152	9.0971	127.148		9.1019	127.168	0.00517733
153	8.0281	113.546		8.023	113.591	0.00673917
154	8.4866	118.707		8.4917	118.677	0.00588187
155	9.1839	127.446		9.1824	127.469	0.00268538
156	9.4019	116.649		9.4036	116.653	0.00173495
157	6.9938	115.498		6.9937	115.49	0.000837549
158	7.2098	121.737		7.2117	121.721	0.00242367
159	7.8845	116.993		7.8793	116.995	0.00520415
160	7.4504	121.293		7.4461	121.24	0.00678367
161	8.0849	119.242		8.0849	119.242	0
162	8.0309	117.747		8.0154	117.795	0.0162149
163	7.4557	111.912		7.4554	111.874	0.00383296
164	7.3844	116.08		7.3838	116.073	0.000939277
165	8.4248	119.15		8.4265	119.206	0.00579852
166	8.7743	118.369		8.771	118.363	0.00335303
167	8.8921	128.855		8.8799	128.865	0.0122354
168	8.1639	128.205		8.1639	128.205	0
169	8.5097	124.33		8.5013	124.285	0.00949428
170	7.6078	100.455		7.5937	100.482	0.0143604
171	7.5317	121.935		7.517	121.851	0.0169085
172	8.2401	122.272		8.2115	122.353	0.0296922
173	9.6152	121.082		9.637	121.159	0.0231041
174	8.0549	119.587		8.0549	119.587	0
175	9.5497	120.48		9.545	120.427	0.00704402
176	8.8533	121.671		8.8555	121.699	0.00358553
178	0	0		0	0	0
177	8.7025	122.856		8.7016	122.856	0.000900218
179	8.2285	121.055		8.2128	120.969	0.0178645
180	8.6774	117.192		8.6786	117.226	0.00358267
181	8.0258	123.126		7.9942	123.086	0.0318435
182	8.1849	120.913		8.1849	120.913	0
183	8.337	117.04		8.3409	117.024	0.00420566
184	8.3841	122.431		8.3786	122.359	0.00899512
185	8.2015	122.378		8.2089	122.549	0.018484
186	8.3227	122.292		8.3489	122.149	0.029794
187	0	0		0	0	0
188	8.2516	123.51		8.254	123.519	0.00257053
189	8.3924	123.563		8.4055	123.729	0.0210622
190	7.8665	118.799		7.8696	118.772	0.00409966
191	8.5079	120.559		8.5118	120.63	0.0080468
192	8.1831	120.682		8.1831	120.682	0
193	9.002	114.989		8.9968	114.988	0.0052006
194	8.8701	124.096		8.8701	124.096	0
195	8.1119	126.95		8.0786	126.923	0.0334071
196	9.1133	112.17		9.0984	112.207	0.015346
197	8.3934	110.608		8.3844	110.597	0.00905758
198	7.1723	114.095		7.1555	114.088	0.0168139
199	7.7279	109.409		7.722	109.351	0.00823269
200	8.8218	122.885		8.8218	122.885	0
201	8.0777	113.195		8.0777	113.195	0
202	7.1415	120.189		7.1459	120.066	0.0128818
203	8.0712	113.525		8.0712	113.525	0
204	9.4153	119.997		9.405	120.032	0.0108862
205	8.3733	116.99		8.3733	116.99	0
206	7.8568	121.035		7.8527	121.022	0.00429428
207	8.1893	119.904		8.1812	119.918	0.00822277
208	8.9512	121.379		8.9613	121.342	0.0107538
209	8.3164	119.821		8.2866	119.932	0.0317511
210	8.1831	119.506		8.1831	119.506	0
211	9.0075	115.65		9.0141	115.68	0.00721323
212	8.2184	116.55		8.2205	116.541	0.00228507
213	7.0884	117.853		7.0886	117.863	0.00100995
214	7.8325	117.595		7.8325	117.595	0
215	7.6022	105.27		7.6042	105.278	0.00213337
216	8.0886	116.53		8.092	116.544	0.00365686
217	9.08	126.732		9.079	126.643	0.00890647
218	9.0651	125.699		9.0601	125.699	0.00500001
219	7.5488	116.391		7.5438	116.365	0.00565103
220	8.1007	121.675		8.1007	121.675	0
221	8.8949	127.466		8.8828	127.509	0.0128401
222	8.3772	128.392		8.3707	128.434	0.00773208
223	0	0		0	0	0
224	8.0307	120.292		8.0259	120.291	0.00480124
225	0	0		0	0	0
226	8.3093	119.362		8.3096	119.389	0.002729
227	8.4672	124.389		8.462	124.326	0.00808974
228	6.3897	112.701		6.3897	112.701	0
229	0	0		0	0	0
230	7.9634	118.224		7.9713	118.223	0.00790075
231	8.9503	113.573		8.9605	113.615	0.0110074
232	8.7356	124.8		8.7323	124.793	0.00337197
233	8.8311	122.067		8.8189	122.119	0.0132148
234	9.3714	128.352		9.3708	128.345	0.000954594
235	8.1451	119.757		8.1451	119.757	0
236	8.3264	116.497		8.3264	116.446	0.00508834
237	8.9233	124.109		8.9623	124.15	0.0392148
238	8.7217	119.838		8.7246	119.85	0.00314526
239	7.4159	120.892		7.4159	120.892	0
240	7.2653	121.757		7.2653	121.757	0
241	7.975	113.513		7.9624	113.473	0.0132135
242	7.6351	114.016		7.6301	114.052	0.0061401
243	7.1724	119.778		7.17	119.871	0.00942802
244	7.1817	116.431		7.1811	116.419	0.00131322
245	9.0129	114.831		9.0141	114.968	0.0135364
246	7.7201	119.309		7.7221	119.308	0.00200245
247	8.3541	119.432		8.3541	119.432	0
248	8.7175	123.847		8.7224	123.853	0.00494079
249	8.1577	120.044		8.1577	120.044	0
250	8.7928	127.545		8.8051	127.581	0.0127868
251	9.0368	126.194		9.0368	126.194	0
252	7.823	101.612		7.8151	101.638	0.00833675
253	7.8946	123.113		7.8956	122.902	0.0208921
254	7.8651	117.159		7.8582	117.076	0.0106539
255	9.3945	126.91		9.3976	126.897	0.00336416
256	7.8746	117.421		7.8746	117.421	0
257	8.1048	128.214		8.107	128.215	0.00220803
258	9.4993	121.551		9.5044	121.562	0.00521496
259	8.6039	118.23		8.6058	118.229	0.00190209
260	8.828	124.672		8.8223	124.811	0.0149216
261	8.5758	126.573		8.5799	126.581	0.00417208
262	0	0		0	0	0
263	8.337	121.418		8.3326	121.329	0.00984814
264	0	0		0	0	0
265	8.1538	124.978		8.1611	124.984	0.00732333
266	8.3681	116.56		8.3681	116.56	0
267	8.3996	119.999		8.3777	119.884	0.0246549
268	8.1568	121.327		8.1568	121.327	0
269	8.072	126.427		8.071	126.313	0.0113494
