# Supplementary material for: The cooperative binding of TDP-43 to GU-rich RNA repeats antagonizes TDP-43 aggregation
Source: eLife. 2021 Sep 7;10:e67605. doi: 10.7554/eLife.67605 (PMC8523171; doi:10.7554/eLife.67605)
Supplement: Figure 3—figure supplement 1—source data 1. [file elife-67605-fig3-figsupp1-data1.xlsx]

## Sheet: E17A
GFP		RFP		GFP		RFP		GFP		RFP		GFP		RFP		Fluorescence intensity recorded along microtubules for the RFP and GFP channels (as described in Methods) and for indicated RFP- and GFP- tagged proteins .
Pixel	Intensity	Pixel	Intensity	Pixel	Intensity	Pixel	Intensity	Pixel	Intensity	Pixel	Intensity	Pixel	Intensity	Pixel	Intensity
0	10447.8	0	7189.29	0	16968.4	0	13167.7	0	14916.7	0	12093.3	0	8925.17	0	5711
1	12068.9	1	8223.98	1	18472	1	17328	1	15833.3	1	13298.1	1	10036.8	1	6902.68
2	12804.3	2	9087.78	2	19023.4	2	16278.3	2	15834.9	2	13150.3	2	10701.8	2	6858.51
3	12614.2	3	8295.6	3	20423.3	3	16141.8	3	16147.4	3	13782	3	9861.2	3	5777.08
4	14242.4	4	10060.1	4	21168	4	14575.6	4	15725.9	4	12881.4	4	10044.6	4	6186.94
5	14113.4	5	9205.81	5	20759.3	5	17477.4	5	16020.9	5	14396	5	10370.5	5	7256.55
6	13778	6	8091.85	6	19297.7	6	16768.5	6	14716.2	6	12898	6	11834.6	6	7530.95
7	13710.4	7	8325.11	7	16109.1	7	14708.6	7	14510.9	7	14163.3	7	12590.5	7	7709.45
8	13521.1	8	8365.43	8	18151	8	15969.8	8	12623.2	8	11756	8	12918.2	8	8537.92
9	13147.3	9	7472.01	9	14312.8	9	13217.4	9	13555.1	9	12340	9	10412.4	9	6945.52
10	13155	10	8020.01	10	14825.9	10	13468.4	10	15884.8	10	15005.1	10	12926.9	10	9134.87
11	14056.2	11	9198.33	11	14664.9	11	12602.5	11	12945.2	11	11946.9	11	14456.7	11	9985.82
12	13463	12	7724.23	12	12831.7	12	10522.8	12	14257.5	12	14308.4	12	13616.1	12	9213.38
13	14133.9	13	8488.78	13	14723.5	13	12531	13	10686.8	13	10408.5	13	14482.8	13	9377.69
14	15568.3	14	10103.4	14	14315.5	14	10565.8	14	11661.8	14	11823.4	14	14286.7	14	8823.19
15	14888	15	9666.14	15	15338.6	15	11791.9	15	9570.61	15	11631.6	15	15302.4	15	10304.1
16	14805.9	16	9677.46	16	14712.3	16	10922.2	16	12002.2	16	11981.8	16	14057.3	16	9498.71
17	14102.9	17	8548.74	17	14957.7	17	11599.5	17	11563.7	17	11853.4	17	16130.3	17	11001
18	11788.1	18	6305.91	18	16311.3	18	11051.3	18	11448.4	18	11045.3	18	17820.7	18	12171.2
19	11649.1	19	6290.36	19	16958.5	19	10926.9	19	10089.1	19	9859.92	19	16555.7	19	10266.6
20	10175.3	20	4878.73	20	17402.2	20	10718.6	20	10394.5	20	11397.2	20	18296.6	20	11670.2
21	10978.7	21	5439.38	21	16696.8	21	11082.6	21	11157.3	21	12453.4	21	20502.8	21	13135.2
22	9526.88	22	4459.36	22	14951.6	22	10743.4	22	11584	22	12983.6	22	21956.9	22	13126.5
23	8874.95	23	3946.15	23	13815.1	23	12035.6	23	10300.5	23	12751.9	23	22123.7	23	13178.3
24	8361.59	24	4394.2	24	12560.1	24	12470.2	24	13903.5	24	16760.2	24	21828.8	24	13238.4
25	9109.52	25	5239.48	25	10550.3	25	9669.11	25	14604.1	25	16341.1	25	21292.1	25	13134.9
26	10614.7	26	6410.96	26	9625.96	26	9640.31	26	15619.6	26	16475.5	26	19154	26	11896
27	10999.8	27	7234.66	27	9617.5	27	9953.35	27	18205.5	27	15724.5	27	17932	27	12465.3
28	11126.6	28	6698	28	9417.22	28	8144.35	28	16014.1	28	14875.4	28	19523.4	28	15689.8
29	11514.4	29	7485.82	29	9200.01	29	5678.37	29	16975.6	29	14061.2	29	22110.6	29	16950.5
30	11590	30	7854.44	30	9796.43	30	7630.03	30	17628.5	30	15330	30	23620.2	30	16405.8
31	11598.9	31	7686.86	31	9648.09	31	8544.83	31	16682.7	31	14962.9	31	24324.8	31	15449.6
32	11144.5	32	7832.84	32	8676.12	32	6530.12	32	15145.4	32	12637.3	32	23594.7	32	15106.1
33	9582.92	33	5913.03	33	9030.16	33	5724.5	33	15931.1	33	13959	33	23142	33	15376
34	10481.4	34	7125.04	34	6747.11	34	5299.34	34	14092.7	34	12051.1	34	22437.6	34	15565.3
35	9334.51	35	5910	35	6281.59	35	6201.85	35	14465.2	35	13693.8	35	21599	35	15713.2
36	9358.41	36	5580.62	36	7399.18	36	8351.7	36	15350.4	36	14171.7	36	21873.6	36	15186.3
37	10079.6	37	6294.6	37	7229.99	37	8979.71	37	14162.8	37	13561.7	37	22751.5	37	15736.2
38	10906.3	38	6260.46	38	7774.23	38	9134.31	38	14754.7	38	14455.3	38	22673.9	38	15458.6
39	11752	39	5736.9	39	7344.39	39	7091.71	39	16750.3	39	16433.4	39	23113.5	39	14852
40	13140.4	40	6200.15	40	7902.84	40	7097.94	40	16711.3	40	16616.6	40	22807	40	15745.4
41	14839.9	41	7970.5	41	7219.14	41	5460.29	41	18527.5	41	17260.6	41	22468.4	41	15583
42	16093	42	9233.03	42	6719.48	42	4969.59	42	19993.1	42	17959.2	42	22731.4	42	14795.6
43	17577.7	43	10825.4	43	9096.81	43	7189.88	43	19628.5	43	15217.1	43	23686.6	43	15526.3
44	18681.9	44	12083.7	44	6334.02	44	4497.63	44	19543.9	44	13938.2	44	23120.7	44	15075.4
45	20145.7	45	13243.9	45	6602.07	45	5730.19	45	20873.8	45	17655	45	23656.6	45	15050.7
46	20790.7	46	13345.2	46	3797.56	46	3264.97	46	18691.2	46	14335.5	46	24975.1	46	15570.7
47	21581.3	47	13687.7	47	6266.79	47	5673.7	47	15534.1	47	10911.4	47	23959.3	47	16826
48	22197.9	48	14741.4	48	3689.01	48	3455.08	48	16950.2	48	14389.4	48	23893.2	48	16379.2
49	21594.8	49	16183.7	49	4221.66	49	4409.11	49	17781.7	49	16244.5	49	25215.5	49	18867.4
50	20689	50	16418.5	50	1951.57	50	1558.24	50	16904.1	50	17058.9	50	26434.3	50	19617.9
51	18905.6	51	15083.1	51	2985.45	51	2912.56	51	15775.1	51	14841.2	51	25703.5	51	20164.3
52	18355.8	52	14311	52	4983.05	52	3972.4	52	17453.2	52	17623.9	52	25125.9	52	20440.8
53	17815.8	53	12204.8	53	4755.82	53	3479	53	14969.1	53	14889.7	53	27707.4	53	22564.6
54	16975.9	54	10921.2	54	4035.28	54	2793.7	54	18397.2	54	18683.7	54	29403.8	54	21861.9
55	16566.4	55	9521.51	55	6077.82	55	3958.47	55	18653.2	55	16867.1	55	29729.8	55	21674.5
56	16271.3	56	9464.18	56	6055.95	56	4463.9	56	20220.7	56	18227.4	56	30158.1	56	23567.8
57	16305.4	57	10345.4	57	5752.88	57	4590.63	57	21473	57	18064.8	57	30590.6	57	22959.1
58	15481	58	10404.6	58	6764.6	58	5235.13	58	21012.6	58	18035.7	58	30616.5	58	21659.8
59	15003.3	59	10231.3	59	8962.45	59	6298.08	59	21579.5	59	18096.8	59	29871.3	59	20672.7
60	15137.1	60	11077.7	60	8742.06	60	6020.93	60	21173.4	60	17378.4	60	30177.3	60	20968.7
61	15515.8	61	11858.6	61	8096.77	61	5388	61	22630	61	20993	61	29834.1	61	21521.8
62	15482.1	62	11304.3	62	8076.12	62	3785.71	62	20945.8	62	20064.2	62	29789.5	62	20864.7
63	15999	63	12654	63	8560.45	63	4818.26	63	20556.3	63	20127.8	63	30250.2	63	20848.9
64	17268.1	64	12885.5	64	7087.47	64	3634.04	64	19773	64	17083	64	30344	64	21013.4
65	17349.6	65	13152.9	65	5505.45	65	4452.37	65	21561.1	65	19070	65	31097.5	65	22747.6
66	17785	66	13584.8	66	4501.9	66	2057.76	66	22798.2	66	19105.9	66	29259.8	66	22307.2
67	18092.1	67	13261.8	67	3890.91	67	2969.71	67	22404.9	67	20638.4	67	29237.6	67	21852.9
68	17853.1	68	13661.5	68	3717.76	68	2562.56	68	22073.8	68	20993.1	68	29006.8	68	23035.3
69	16924.3	69	12894.5	69	3907.06	69	2010.51	69	23028	69	20528.8	69	27448.2	69	21085.4
70	16091.2	70	12585.1	70	3056.8	70	1415.4	70	22610.9	70	18606.3	70	28165.5	70	21059.8
71	16107.6	71	12334.3	71	1866.43	71	951.785	71	23405.3	71	20183.9	71	28621.1	71	20991.4
72	15620.4	72	12365.8	72	4191.72	72	1750.98	72	22830.9	72	21966.9	72	28616.3	72	20516.2
73	15694.8	73	12965.7	73	5394.89	73	3040.93	73	24204.8	73	23748.2	73	28890.7	73	21780.6
74	18610.9	74	14351.6	74	4917.9	74	2366.79	74	25638.3	74	24451.6	74	29407.4	74	20118.4
75	17456	75	14108.7	75	3125.71	75	1312.27	75	25074.5	75	22868.2	75	29201.2	75	20004.9
76	18600.5	76	14973.2	76	2998.03	76	1590.78	76	28785.9	76	25979.4	76	28358	76	19569.4
77	18467.1	77	14489.4	77	4301.04	77	2727.91	77	27624.6	77	25421.5	77	28862.9	77	19749.3
78	19355.1	78	14672.2	78	6418.44	78	3257.04	78	26346.8	78	27525.8	78	29418.3	78	19705.6
79	19936.7	79	15282.2	79	6044.97	79	3522.15	79	26239	79	26570.4	79	30025.5	79	21245.5
80	20860.2	80	13517.1	80	5033.87	80	3339.74	80	26919.2	80	27254.9	80	30735.5	80	21432.5
81	21225.8	81	14139.8	81	5208.38	81	3362.44	81	28452.5	81	27353	81	31044.8	81	21454.5
82	20473.6	82	10738.9	82	5372.25	82	2826.73	82	27868.9	82	25378.4	82	31913.4	82	21352.8
83	21998.8	83	12431	83	6394.47	83	4513.45	83	27852.5	83	25673	83	31465.1	83	22385.4
84	23809.6	84	13975.1	84	6159.7	84	4239.31	84	27927.1	84	28647	84	30020.3	84	21201.5
85	25562.4	85	16098.4	85	6253.31	85	4704.25	85	27753.1	85	27788.8	85	31247.6	85	21994.7
86	26200.6	86	17562	86	7502.94	86	5377.86	86	30752.3	86	30009.7	86	32531.1	86	22437
87	25617.2	87	18575.4	87	6304.55	87	4562.44	87	34141.7	87	32925.2	87	33066.7	87	23811.5
88	26525.9	88	18749	88	5693.93	88	4466.04	88	34898.6	88	30847.5	88	32970.7	88	24495.9
89	25547.8	89	18495.8	89	6822.89	89	4789.12	89	33111.9	89	26537.3	89	33614.8	89	24608.5
90	24816.5	90	17591.9	90	5235.9	90	4667.61	90	34688	90	27629.6	90	30153.7	90	21607.5
91	24597.6	91	16931.8	91	4450.26	91	3928.13	91	37897.7	91	30968.6	91	30808.2	91	21451.3
92	26335	92	16984.2	92	5419.03	92	4042.97	92	34800.6	92	26797.8	92	33590	92	22571
93	25887.4	93	16300.8	93	3541.36	93	2901.83	93	40174.4	93	32329.6	93	34810.1	93	24559.3
94	26546.1	94	17373	94	4281.8	94	2944.79	94	38410.5	94	29850.8	94	35235.8	94	26414.9
95	26636	95	18484.8	95	3689.8	95	2526.26	95	38434.4	95	28176.3	95	35436.5	95	26898.6
96	27017.1	96	17484.4	96	4264.84	96	1420.54	96	44371.9	96	35365.7	96	35846.4	96	27253
97	26555.3	97	16339.7	97	5471.98	97	1834.97	97	39995.1	97	29995.1	97	35511.5	97	27017.8
98	25850.3	98	15269.3	98	4158.79	98	870.392	98	42933.5	98	32565	98	33898.1	98	25271.2
99	26084.8	99	14529.9	99	4446.93	99	1117.96	99	45741	99	36021.2	99	35162.2	99	26308.9
100	25870.8	100	14122.5	100	3854.26	100	883.562	100	42096.4	100	32910.7	100	34444.7	100	26458.5
101	26108.5	101	14836.8	101	4035.74	101	605.232	101	35874.9	101	26454.5	101	34794.6	101	27379.5
102	26577.4	102	15552.4	102	2992.89	102	1442.33	102	36871.4	102	30718.2	102	34174.4	102	26596.4
103	23809.1	103	15624	103	3511.3	103	2122.89	103	39344.1	103	32593.5	103	36323.9	103	28730.2
104	23206	104	14506.1	104	3820.77	104	2812.39	104	32314.5	104	26124	104	35562.6	104	26819.9
105	24110	105	15402.7	105	4173.49	105	4713.66	105	37700.7	105	32461.1	105	34993.5	105	25640.4
106	24931.2	106	15662.1	106	5490.16	106	6336.14	106	38248.7	106	33680.1	106	33825.2	106	24547
107	24781	107	16141.6	107	5802.02	107	4061.68	107	34058.4	107	30554.5	107	32478.1	107	24103.3
108	23237.1	108	15032.9	108	5981.08	108	4013.41	108	36785.7	108	32338.7	108	35470.2	108	25427
109	22282.6	109	14301.3	109	5047.52	109	4030.91	109	39592.7	109	37869.6	109	33613	109	23134.1
110	21563	110	13848.4	110	5763.18	110	4911.24	110	34048.8	110	32370.1	110	33857.6	110	24624.1
111	21898.5	111	13664.3	111	5109.9	111	3507.37	111	35150.3	111	30406.8	111	34526.6	111	24891.7
112	21544.2	112	12776.7	112	5364.02	112	4105.98	112	32389.6	112	24747.7	112	34983.8	112	24745.8
113	19487.3	113	11577.9	113	5944.01	113	4330.39	113	34447.7	113	23811	113	33733.2	113	23787.6
114	19221	114	10393.9	114	5282.68	114	3403.68	114	39102.1	114	27464.3	114	31863.4	114	22967.4
115	17858.2	115	10252.9	115	6063.98	115	3130.64	115	33918.3	115	23267.4	115	30665.3	115	22886
116	19164.3	116	10400.5	116	7242.69	116	3209.46	116	31474	116	20651	116	27795.9	116	22142.9
117	19770.9	117	11851.8	117	7603.38	117	3545.24	117	38487.8	117	29409.4	117	25695.9	117	21340
118	19852.9	118	12756.6	118	7587.83	118	4230.07	118	31416.5	118	22489.5	118	25558.3	118	20708.3
119	19374.2	119	12818.4	119	6962.6	119	5345.35	119	32992.8	119	24072.2	119	22075.2	119	18238.1
120	19503.7	120	12993.7	120	7300.06	120	6430.1	120	39269.9	120	29405.8	120	20998.8	120	18523.6
121	20469.6	121	13155.7	121	7648.35	121	7225.84	121	42418.6	121	31475.6	121	20647.4	121	20397.2
122	22116.2	122	13773.1	122	8588.37	122	6631.24	122	37033.6	122	26309.6	122	20697.6	122	19086.7
123	23076.8	123	13717.8	123	8815.69	123	6763.01	123	35404.6	123	28067.5	123	20749.3	123	18352.8
124	23293.6	124	14698.7	124	9778.92	124	6606.13	124	40246.4	124	33602.2	124	20988.2	124	18796.7
125	22470.8	125	14560.4	125	10906.1	125	6984.9	125	34438.6	125	28078.6	125	21250.7	125	17829
126	22489.6	126	14982.7	126	10534.9	126	7312.4	126	34735	126	29016.8	126	21953.6	126	18869.5
127	21100	127	11880.6	127	11483.7	127	7295.98	127	37588.7	127	29384.9	127	22273	127	20095.9
128	22266.7	128	13013.9	128	11475.5	128	7673.59	128	39075.2	128	30040	128	22870.9	128	20576.1
129	23085.6	129	12533	129	11655.2	129	7606.76	129	38990.2	129	33171.9	129	23917.5	129	21081.7
130	23543.3	130	13152.6	130	12734.6	130	7806.29	130	39006.3	130	34723.1	130	25154.2	130	22122.4
131	24625.8	131	13770.3	131	13034.3	131	8121.8	131	37327.1	131	30202	131	26023.9	131	22615.9
132	26197.1	132	14269.9	132	12840.6	132	7432.17	132	35992	132	31369.8	132	27204	132	23482
133	24189.4	133	11518.5	133	10866.6	133	8233.3	133	38471.7	133	34038.9	133	26789.3	133	24641.3
134	25693.8	134	12917.1	134	12831.8	134	8536.87	134	39338.3	134	33467	134	27104.5	134	24470.7
135	26650	135	14130.1	135	10366.7	135	8117.32	135	38245.1	135	30124.3	135	28795.9	135	25537.6
136	27519.4	136	15363.9	136	9888.71	136	7875.92	136	38243.6	136	29665.7	136	26366.5	136	22626.6
137	28320.6	137	15963.7	137	11140.7	137	8317.2	137	37800.6	137	29945.9	137	26265.2	137	22121.9
138	29738.4	138	16384.3	138	10667.4	138	8118.69	138	35185.8	138	29513.3	138	25354.1	138	20384.2
139	31270.5	139	17688.2	139	10783.8	139	7360.45	139	31854.5	139	26396.2	139	26422	139	22040.9
140	31291.2	140	18915.6	140	11083.5	140	7644.41	140	30068.9	140	24760.9	140	27416.1	140	24182
141	28523.6	141	15330.3	141	11457.1	141	7409.92	141	33842.3	141	27528.1	141	27502.8	141	23110.8
142	26705.9	142	13859.2	142	10795.2	142	6749.76	142	33811.8	142	26156.4	142	26788.2	142	20832.6
143	24452.5	143	12818.2	143	10698.4	143	6743	143	33901.2	143	26631.3	143	25094.8	143	19079.2
144	22413.2	144	11654.7	144	10648	144	7335.34	144	36788.8	144	26480.6	144	24203.8	144	18363
145	27460.1	145	14610.6	145	10022.2	145	7597.67	145	34684.2	145	23906.1	145	24678.4	145	19261.3
146	26010.7	146	13436.1	146	9509.81	146	7183.35	146	33763.6	146	24721.2	146	25477.7	146	22056.2
147	30559.8	147	17597.3	147	9231.75	147	7066.22	147	31671.4	147	24363.9	147	25671.6	147	22045.5
148	31088.2	148	16522.5	148	9719.56	148	7905.96	148	31350.6	148	25473.2	148	26695.4	148	23405.1
149	32108.5	149	16599.4	149	10086.6	149	7331.75	149	29544.9	149	23208.4	149	26192.5	149	22635.7
150	31639.4	150	16963.8	150	10649.7	150	6482.56	150	30115.3	150	21582.9	150	26642.2	150	22995.9
151	31938.8	151	18249	151	10238.1	151	5623.9	151	30688.8	151	22056.6	151	25937.9	151	20890.5
152	32004.3	152	19608.2	152	9076.76	152	5697.76	152	28288.9	152	22005.1	152	25459.4	152	20713.4
153	32450	153	20246.9	153	9158.63	153	4622.84	153	30645	153	23465.4	153	25706.6	153	22799.6
154	32318.6	154	19874.6	154	9549.27	154	5577.38	154	26647.9	154	21001.4	154	26505	154	23661.1
155	30599.7	155	19633.1	155	10160	155	6286.54	155	25942.2	155	20411	155	27116.4	155	24541.9
156	29650	156	19052	156	10545.5	156	6522.4	156	26372.1	156	20363.5	156	28192.3	156	25033.4
157	28427.6	157	18200.2	157	10435.1	157	5760.96	157	25810	157	20235.6	157	27782.4	157	24449.4
158	30233.3	158	20032.3	158	10326.3	158	5419.85	158	26504.1	158	19857.7	158	27826.3	158	25343.6
159	33392.1	159	23292.9	159	8750.03	159	6017.45	159	25437.8	159	21126.2	159	28329.4	159	26679
160	33053.9	160	22017.8	160	8175.05	160	6359.7	160	24728.5	160	17186.3	160	28359.8	160	27583.6
161	32459.1	161	19928.9	161	8151.4	161	6171.3	161	22674.8	161	15951	161	28590.5	161	26234.3
162	30768.9	162	18598.8	162	8836.22	162	5342.74	162	22142.6	162	14659.8	162	29751.6	162	27179.7
163	29009.1	163	17942.1	163	8387.53	163	4885.76	163	21809.6	163	14849.7	163	29132.7	163	26424.3
164	30121.2	164	18786.7	164	8749.43	164	4932.38	164	20502.8	164	15080.2	164	29202.9	164	27218.1
165	32238.2	165	20506.1	165	8323.92	165	5447.69	165	23148	165	18578.6	165	29496.8	165	28302.1
166	32004.6	166	20220.4	166	8667.3	166	5173.8	166	22414.4	166	15950.1	166	29901.5	166	28621.9
167	31583.2	167	19352.1	167	8760.35	167	6148.63	167	23358.2	167	17193.9	167	29628.1	167	25690.1
168	36782.2	168	22597.4	168	8712.47	168	5559.39	168	22986	168	17224.7	168	30076	168	25405.6
169	37564.2	169	23501.4	169	9812.9	169	6622.22	169	21348.7	169	15025.6	169	30287.1	169	27418.8
170	36225.4	170	23563.5	170	9408.81	170	6529.62	170	18030.5	170	12859.2	170	30404.8	170	28530.3
171	34516.9	171	22048.7	171	8544.39	171	5559.6	171	13300.7	171	10442.9	171	30873.5	171	29223.9
172	34519.9	172	21795.1	172	8972.87	172	5580.57	172	11643.9	172	10808.2	172	30953.1	172	29293.4
173	35331.9	173	22230.6	173	7652.79	173	5602	173	11723.4	173	11898.3	173	30712.8	173	29698.2
174	36564.8	174	23018.5	174	7907.91	174	4414.71	174	11784.1	174	11272	174	30088	174	28571.2
175	36708.6	175	22310.9	175	7863.86	175	4278.4	175	10867.1	175	11271.3	175	31994.8	175	31082.1
176	36483.8	176	22257.4	176	7129.95	176	4143.55	176	10524.4	176	11691.8	176	29375.1	176	26745.1
177	35688.9	177	22037.3	177	7536.74	177	6444.84	177	11371.5	177	11897	177	27929.8	177	25474
178	41574.8	178	27471.4	178	7718.23	178	5884.31	178	12340.7	178	10693	178	27305.2	178	26238.2
179	39568.9	179	24127.6	179	8005.48	179	5352.3	179	12842.1	179	12306.6	179	27688.7	179	27136.1
180	40461.1	180	23228.3	180	8728.44	180	4489.05	180	13807.2	180	14357.4	180	28363.3	180	28103
181	40039	181	21973.3	181	8319.45	181	4059.97	181	14973.3	181	13992.9	181	27988	181	27839.4
182	39318.9	182	23710.2	182	10254	182	6131.66	182	14812.4	182	12635.6	182	27471.4	182	26608.2
183	38364.7	183	24943.9	183	10373.6	183	5934.25	183	15303.7	183	13285.5	183	29210.8	183	28184.1
184	40089.2	184	24690.7	184	10461.2	184	6316.77	184	17392.8	184	13849.1	184	28534.9	184	27225.8
185	40157.3	185	25061.2	185	10904.8	185	5430.64	185	16922.7	185	12179.6	185	28949.9	185	26561.8
186	40424.2	186	26502.2	186	10591.6	186	5306.33	186	14878.1	186	11781.5	186	29748.4	186	27091.6
187	40466.5	187	26869	187	10203.1	187	6723.33	187	15065.1	187	11124.6	187	30229.3	187	27124.7
188	39560.3	188	27161.6	188	10812.4	188	5114.66	188	13800.6	188	10775.4	188	29055.9	188	25169.5
189	42777.8	189	25639.9	189	10323.9	189	5206.55	189	14386.1	189	11426.1	189	28381.1	189	24865.5
190	36812.5	190	18159.2	190	9035.66	190	5168.38	190	14935.3	190	9341.54	190	29316.4	190	24279.8
191	35124.2	191	17699.8	191	8489.41	191	4438.85	191	13329.3	191	7523.13	191	29721.6	191	24083.4
192	33673.3	192	17132.2	192	8473.94	192	4815.16	192	12107.3	192	6798.76	192	29070.4	192	23096.9
193	27762.8	193	12616.6	193	8726.39	193	5093.62	193	11251.5	193	5980.75	193	28870.1	193	21536.1
194	21061.8	194	9563.92	194	9176.31	194	5497.31	194	10630.4	194	4849.95	194	27770	194	21571.5
195	18843.2	195	8274.11	195	10387.7	195	6400.39	195	9227.28	195	4478.63	195	26425.7	195	19775.8
196	17764.9	196	8336.07	196	12555.5	196	6642.75	196	8014.24	196	5501.87	196	24730.2	196	18251.7
197	18267.3	197	8900.2	197	12933.5	197	6540.41	197	8244.92	197	6262.6	197	23226.4	197	17242.4
198	20412	198	9683.9	198	12041.4	198	5731.21	198	9791.3	198	8146.12	198	21883.4	198	16467.1
199	24275.7	199	11692.9	199	13093.2	199	6644.82	199	12165.1	199	8212.86	199	23891.4	199	21306.9
200	27934.2	200	13706.5	200	11429.3	200	5699.15	200	12631.4	200	9174.84	200	21862.6	200	18622.1
201	28972.1	201	14232	201	10442.2	201	5435.06	201	12071	201	9529.36	201	21604	201	18589.5
202	28616.5	202	14100.6	202	9770.7	202	5016.44	202	10650.7	202	7512.27	202	21214.1	202	18852.2
203	28750.5	203	14216.7	203	9473.36	203	4549.43	203	10085.1	203	7158.62	203	21026.7	203	18597.4
204	28608.9	204	14483.8	204	7885.41	204	5198.58	204	8173.23	204	5024.27	204	20448.9	204	18075.5
205	28309.1	205	14278.9	205	7982.56	205	4803.39	205	6533.12	205	4339.02	205	19853.3	205	17777.5
206	27868.6	206	13719.7	206	7727.6	206	5438.55	206	4958.25	206	3461.22	206	19271.1	206	17158.5
207	26248.8	207	12733.5	207	7182.24	207	4334.07	207	4265.67	207	3547.34	207	19238.5	207	16822.4
208	23887.6	208	11451.6	208	6255.32	208	3744.78	208	4332.43	208	3107.2	208	19311	208	16661.2
209	22303.8	209	11051.5	209	6978.61	209	4753.23	209	3719.24	209	2307.9	209	22354.7	209	20272.5
210	26829.1	210	13223.1	210	6873.39	210	5166.91	210	4633.38	210	2665.3	210	23853.3	210	21910.5
211	25480.9	211	12512.7	211	6179.9	211	4415.9	211	4912.84	211	3083.53	211	23987.3	211	21202.3
212	27649.4	212	13547.6	212	8665.63	212	6090.33	212	4715.64	212	3881.85	212	25643.7	212	24930.1
213	28276.3	213	14079.8	213	8848.75	213	4936.23	213	5146.07	213	3516.3	213	25504.9	213	24014.9
214	28430.8	214	14616	214	10925.1	214	6717.78	214	4755.98	214	4321.65	214	25830.7	214	24068
215	28108	215	13992.5	215	10301.8	215	6295.19	215	4698.71	215	4258.01	215	26768.3	215	24418.8
216	27552	216	13703.9	216	9262.42	216	5626.35	216	3726.76	216	4042.3	216	27096.6	216	24330.9
217	28840.7	217	13995.8	217	8940.06	217	7735.68	217	4053.11	217	2124.57	217	27385.7	217	23850
218	29874.4	218	13993.3	218	8975.38	218	6896.71	218	4772.1	218	1715.12	218	26558	218	23465.9
219	28009	219	13615.9	219	9359.92	219	5762.88	219	4360.43	219	2396.12	219	25406.6	219	22376.3
220	28649.6	220	15614.6	220	10729.7	220	7198.39	220	2593.49	220	1202.3	220	24616	220	21365.8
221	25227.6	221	14228.8	221	12119.3	221	7192.2	221	3053.06	221	418.789	221	24699.2	221	22122.8
222	21549.4	222	12962.7	222	12376	222	6284.15	222	2008.52	222	485.953	222	25544.6	222	22985.2
223	20057.3	223	12138.5	223	12067.8	223	6509.57	223	4081.33	223	786.813	223	26318.4	223	24028.7
224	20845.1	224	10649.3	224	10631.3	224	6460.94	224	2910.84	224	738.13	224	28087.3	224	24053.4
225	18381.4	225	9417.89	225	11067.9	225	6252.18	225	3452.73	225	660.639	225	28859.7	225	25013.3
226	17380.7	226	9392.72	226	10705.5	226	6766.01	226	4377.39	226	1855.67	226	29947.7	226	25154.7
227	19406.9	227	9202.48	227	11062.6	227	7303.71	227	4378.32	227	2885.79	227	29921	227	24903.7
228	18807.5	228	8116.09	228	11473.5	228	8315.82	228	8634.21	228	6200.36	228	29707.9	228	24789.8
229	18465.8	229	8178.6	229	12059.5	229	8769.67	229	7892.72	229	6620.45	229	29293.1	229	24849.4
230	19295.2	230	6619.67	230	11551	230	8203.95	230	9961.2	230	8017.82	230	28451.6	230	24031.7
231	20068.5	231	7849.95	231	12327.5	231	8688.15	231	10592.2	231	8801.36	231	28243.7	231	23045.8
232	20803.4	232	8614.48	232	11470.6	232	10418.8	232	12013.2	232	10294.2	232	27873.4	232	23220.5
233	20202.2	233	9312.64	233	8572.45	233	7628.56	233	14105.7	233	10834.6	233	28081.8	233	24255.7
234	22401.8	234	10292.4	234	7936.26	234	6987.56	234	10825.7	234	8764.78	234	27520.2	234	22426.7
235	23106.4	235	11129.1	235	7252.37	235	5815.93	235	9101.7	235	6307	235	26452.1	235	20917.6
236	23529.5	236	11262.1	236	9151.84	236	7511	236	8935.4	236	4526.32	236	25892.6	236	21411.1
237	23611.9	237	10919.4	237	9829.97	237	8741.03	237	9486.85	237	5495.41	237	24994.2	237	20437.9
238	27901.5	238	12966.9	238	10603.3	238	9963.5	238	8844.66	238	5390.04	238	24448.7	238	21039.5
239	27380	239	12535.7	239	10860.8	239	10355.5	239	6620.3	239	2382.82	239	24269.9	239	21208.8
240	26651	240	12636.4	240	10509.8	240	9279.72	240	7304.76	240	4386.52	240	23971.7	240	20272.6
241	22812.1	241	11382.2	241	9538.16	241	7472.1	241	6229.45	241	4199.98	241	24245.8	241	22080.2
242	23286.5	242	11478.7	242	9261.15	242	5939.32	242	5645.04	242	4294.22	242	24413.8	242	21558.1
243	23000.7	243	10713.3	243	9346.75	243	5552.94	243	6463.94	243	2953.82	243	24059.2	243	20532.3
244	20956.9	244	10098.6	244	9333.15	244	5219.2	244	7792.1	244	4555.34	244	23264.9	244	20000
245	18907.6	245	8414.27	245	9269.3	245	4794.81	245	8893.27	245	6957.73	245	23116.4	245	19796.5
246	18729.5	246	8411.67	246	9828.62	246	6185.38	246	9292.53	246	7081.79	246	22758.8	246	19833.3
247	19407.6	247	8596.76	247	10207.3	247	6796.1	247	9694.76	247	6363.83	247	22765.9	247	21567.9
248	19038.6	248	9321.08	248	10262.7	248	7036.23	248	8163.67	248	5973.82	248	22855.3	248	20952.2
249	16193.4	249	8633.06	249	10653.5	249	7665.97	249	8441.13	249	5050.28	249	22508.9	249	19789
250	15976.4	250	8876.01	250	11669.3	250	8743.15	250	8435.34	250	3666.82	250	21355.9	250	18206
251	15725.5	251	8255.06	251	13005	251	9396.89	251	9045.37	251	3852.31	251	20309.2	251	17580.5
252	16180	252	8916.06	252	11818.3	252	9590.94	252	7968.93	252	4426.63	252	20657	252	17557.8
253	16673.4	253	8045.3	253	12183.4	253	8523.06	253	5105.86	253	4845.66	253	20379.6	253	16509.8
254	16120.2	254	8092.42	254	13715.9	254	9178.96	254	4239.38	254	4158.05	254	19980	254	17372.6
255	16293.8	255	7790.04	255	15282.7	255	10889.4	255	3117.39	255	3271.77	255	19979.5	255	16877.4
256	17203.2	256	7552.82	256	14339.1	256	11449.2	256	978.065	256	1815.72	256	19589.2	256	16471
257	16856.5	257	7364.2	257	14384.4	257	11751.3	257	1215.84	257	1745.92	257	19156.6	257	15876.5
258	15043.4	258	6247.17	258	12090.1	258	9919.81	258	1454.86	258	1342.38	258	18993.4	258	15416.1
259	14426.1	259	5348.23	259	11261.8	259	9536.32	259	3760.88	259	2167.93	259	18695.9	259	15149.4
260	15196.1	260	6243.58	260	8992.58	260	7150.49	260	2982.11	260	2307.98	260	18256.1	260	15292.2
261	15156.2	261	6127.67	261	7376.1	261	5015.48	261	6221.08	261	2187.41	261	17999.7	261	13920.8
262	18930.7	262	8003.09	262	7280.97	262	5463.24	262	7376.51	262	4161.07	262	17755.2	262	13926.9
263	21084	263	9376.31	263	6459.93	263	4177.98	263	7073.81	263	5255.42	263	17744.5	263	14129.3
264	21744.5	264	10122.4	264	8064.06	264	5230.29	264	8259.38	264	5190.01	264	17854.2	264	14533
265	23097.3	265	12345.1	265	8625.9	265	5560.16	265	7687.73	265	5402.46	265	18020.4	265	14634.6
266	21768.5	266	11453.2	266	11122.4	266	6214.12	266	7989.18	266	6103.39	266	18413.3	266	15116.3
267	19413.2	267	8641.75	267	11244.5	267	5935.99	267	8631.96	267	7554.06	267	17899.2	267	14421.9
268	18371	268	7896.76	268	13384.8	268	7628.01	268	4689.56	268	4822.75	268	18151.7	268	14551.3
269	14553.4	269	5046.24	269	13706.2	269	8641.54	269	6674.46	269	5784.5	269	17972.5	269	14652
270	11597.7	270	4719.15	270	13584.1	270	10189.8	270	6862.16	270	5529.02	270	17825.9	270	14482.2
271	11497.3	271	5711.74	271	13907.5	271	11134.8	271	7699.01	271	6202.51	271	17685.2	271	13842.2
272	12201.6	272	6537.67	272	13810.8	272	12253.6	272	8896.66	272	7886.87	272	17470.9	272	13329.5
273	13498.4	273	8196.07	273	13994.2	273	12366.8	273	9371.64	273	8060.1	273	17846.6	273	14192.7
274	13433	274	7255.24	274	13797.1	274	12283.8	274	9225.84	274	8010.09	274	18381.9	274	14393.9
275	12946	275	5829.85	275	13426	275	10750.1	275	11353.5	275	6835.66	275	18659.6	275	14305.5
276	12249.1	276	5763.35	276	13448.2	276	9993.79	276	17502.2	276	8848.71	276	16762.7	276	12616.4
277	13538.9	277	6311.92	277	13453.1	277	9722.09	277	16982	277	9199.25	277	17072.7	277	13472.3
278	14192.5	278	6336.06	278	12810	278	9811.66	278	21007.2	278	12281.3	278	17512.6	278	13713.6
279	15629.9	279	7261.76	279	11924.3	279	9798.72	279	24500.6	279	15156.1	279	17674.8	279	13556.7
280	16844.1	280	7262	280	10579.1	280	9670.48	280	23093.8	280	16602.7	280	17808.5	280	14423.2
281	17811.6	281	8463.98	281	10358.9	281	8137.01	281	19446.7	281	15459.9	281	18117.8	281	14287.5
282	19254.3	282	9314.33	282	10140.1	282	7063.36	282	8088.1	282	7603.03	282	16245.7	282	12905.1
283	19864.6	283	8959.22	283	10330.9	283	6275.83	283	7118.72	283	4957.18	283	16335	283	13178.4
284	19812.4	284	9032.01	284	9937.28	284	6796.73	284	5246.97	284	1221.58	284	16986	284	14042.4
285	19128.7	285	8241.85	285	9886.46	285	7657.79	285	5226.81	285	2138.1	285	18326.1	285	15198.1
286	16834.2	286	6606.28	286	9852	286	7320.18	286	3246.05	286	415.124	286	19337	286	16541.5
287	13397.4	287	5446.12	287	9248.72	287	6561.52	287	2998.06	287	575.985	287	19621.7	287	17541.6
288	16947.8	288	7732.66	288	8311.97	288	5710.37	288	4585.21	288	1812.25	288	19457.8	288	16775.3
289	12484.6	289	5563.42	289	7685.29	289	4976.51	289	6851.54	289	3870.81	289	19521.7	289	16056.9
290	22089.4	290	9259.48	290	7154.52	290	4303.06	290	7164.8	290	3643.41	290	19878.7	290	16252.5
291	25051.2	291	10920	291	7291.67	291	3540.78	291	8230.43	291	5119.27	291	20290.9	291	17013
292	26875.3	292	11217	292	7665.12	292	4053.39	292	9173.38	292	5564.95	292	20856.8	292	17542.5
293	25721	293	11309.5	293	8216.92	293	4642.18	293	11098.7	293	7438.29	293	21627.6	293	18677.9
294	23805.8	294	10542.8	294	8727.82	294	5171.59	294	11118.3	294	7125.31	294	22143.6	294	18712.3
295	22275	295	10387	295	8567.43	295	5095.74	295	11414.6	295	6573.31	295	22076.4	295	17834
296	21366.4	296	10806.8	296	9829.3	296	7425.33	296	11240.5	296	6714.36	296	22013.8	296	17033.8
297	18365	297	8801.8	297	9312	297	6266.48	297	12366.4	297	8582.62	297	22677.5	297	17001.1
298	17935.8	298	9825.18	298	8710.68	298	5070.96	298	13588.7	298	9087.63	298	23727.3	298	18363
299	11715.7	299	6813.15	299	9614.11	299	7694.75	299	12341.3	299	6507.24	299	24466.1	299	19141.8
300	6972.26	300	2989.81	300	9847.39	300	7135.11	300	8772.22	300	4120.77	300	25014	300	19246.1
301	7365.19	301	1676.61	301	9012.56	301	6832.86	301	8459.03	301	4184.69	301	25105.4	301	19828.2
302	10064.1	302	2858.38	302	9413.14	302	5240.71	302	9274.3	302	4158.11	302	24994.9	302	19684.4
303	9006.59	303	3762.58	303	7845.89	303	3626.97	303	11003	303	6521.69	303	25145.9	303	19609.3
304	9749.64	304	4453	304	7654.53	304	4117.28	304	12004.8	304	7072.4	304	25783.6	304	19848.4
305	10713.6	305	4719.41	305	7814.45	305	6243.56	305	13317	305	8642.7	305	26840.6	305	20546.1
306	14777.6	306	6683.98	306	7699.6	306	5086.07	306	13576.5	306	8812.3	306	23178.6	306	16362.5
307	15018.7	307	6940.77	307	7909.18	307	5905.49	307	13344.1	307	6967.7	307	24326.5	307	17279.9
308	17478.6	308	8349.19	308	9169.58	308	7162.63	308	12747.3	308	7517.38	308	22480.9	308	14778.8
309	15206	309	7230.63	309	8839.29	309	7118.41	309	11912.3	309	6187.1	309	21931.4	309	14194.6
310	12339.8	310	5609.08	310	8098.89	310	6614.68	310	11433.8	310	6416.75	310	22561.4	310	15117.2
311	10352	311	5618.54	311	6851.95	311	5293.49	311	8922.78	311	5479.37	311	21623.7	311	15104.7
312	10788	312	6336.56	312	5734.68	312	3174.1	312	8202.52	312	7053.96	312	19869.3	312	14421.9
313	11452.2	313	8437.01	313	6850.91	313	4584.47	313	12845.9	313	9843.57	313	18060.9	313	12997.4
314	11537	314	7405.24	314	6752.15	314	5221.15	314	14956.7	314	9961.87	314	16091.6	314	11174.4
315	11898.6	315	7855.36	315	6337.07	315	4030.61	315	15905.8	315	8786.92	315	15069.9	315	10904
316	14361.3	316	8536.94	316	7420.01	316	4832.95	316	15317.4	316	8229.64	316	13660.9	316	9318.69
317	15723	317	9834.24	317	7822.83	317	5302.29	317	14870.7	317	6655.38	317	12486.2	317	8081.54
318	13747.6	318	8108.67	318	9116.89	318	6449.21	318	12716.8	318	6044.1	318	15740.4	318	10628
319	11982.1	319	8336.65	319	8746.47	319	6464.2	319	9739.64	319	5570.93	319	13620	319	8384.11
320	13811.5	320	10494.6	320	7766	320	7283.47	320	7252.42	320	4191.44	320	13679.2	320	8770.28
321	13415.3	321	9896.91	321	6260.3	321	6262.15	321	5403.57	321	3524.55	321	14166.6	321	8222.02
322	14500.4	322	9033.45	322	8781.57	322	6128.15	322	4935.82	322	3717.87	322	14634.4	322	8968.54
323	13207.9	323	7061.8	323	11176.6	323	7911.3	323	3690.83	323	3130.64	323	13928.3	323	8528.39
324	12322.8	324	5310.14	324	11269.1	324	7336.45	324	3655	324	4067.91	324	13372.1	324	8509.76
325	11092	325	4572.78	325	11328.4	325	7310.2	325	4026.87	325	4444.29	325	16741.6	325	11242.1
326	11119.3	326	4553.61	326	9601.95	326	5169.09	326	4395.15	326	4455.41	326	14910.9	326	9244.81
327	12446.7	327	6315.33	327	10516.8	327	7224.13	327	4602.33	327	3055.72	327	15126.2	327	8705.74
328	10367	328	5986.38	328	8302.82	328	5028.63	328	5080	328	3743.98	328	18834.6	328	11102.9
329	15665.8	329	10311.8	329	7144.02	329	3045.76	329	8428.81	329	5368.4	329	18707.1	329	10597.4
330	17879	330	11268.6	330	5498.24	330	2143.31	330	7586.06	330	5802.79	330	19015.4	330	11706.4
331	17351	331	10173.1	331	4987.04	331	1580.3	331	8330.89	331	5689.01	331	18255.4	331	11909.8
332	21717.1	332	11537.6	332	5804.07	332	2978.59	332	12790.1	332	8811.92	332	20384.4	332	14244.9
333	21870.1	333	11436.9	333	4868.63	333	1934.34	333	14837.9	333	9112.36	333	21194.4	333	14312.5
334	21266.6	334	11676.6	334	3830.37	334	1456.08	334	13524.6	334	8984.19	334	20925.8	334	13358.7
335	19551.4	335	9719.36	335	3735.71	335	2449.02	335	15944.8	335	10161.7	335	20460.1	335	12386.6
336	16909.2	336	7313.62	336	5055.39	336	3952.26	336	15918.7	336	10871	336	21161.4	336	12836.4
337	14755.1	337	6416.42	337	4434.29	337	3863.11	337	17657	337	12811.3	337	19752.9	337	12052.7
338	13066.9	338	5875.67	338	6055.69	338	4773.47	338	17628.1	338	13109.8	338	17897.1	338	12190.4
339	10707	339	4448.22	339	6830.37	339	5746.54	339	17088.2	339	11418.2	339	17623.1	339	11725.5
340	8521.43	340	3648.98	340	8530.16	340	7344.24	340	17179.9	340	10615.2	340	16173.2	340	10008
341	8797.6	341	3772.33	341	9040.67	341	6042.94	341	12330.6	341	9106.35	341	15584.5	341	10833.6
342	3699.89	342	1488.36	342	5162.86	342	3292.58	342	14224.5	342	10947.5	342	15026	342	10819.7
343	1340.28	343	558.209	343	4035.77	343	3285.44	343	14478.9	343	9948.83	343	13548.9	343	9844.07
344	2097.13	344	820.536	344	3142.59	344	2583.05	344	16520	344	10597.5	344	13993.7	344	9030.54
345	2789.29	345	1923.3	345	2493.58	345	2465.97	345	12717.6	345	8097.83	345	13230.2	345	8377.54
346	3384.08	346	3154.95	346	4259.34	346	5240.41	346	11185.7	346	7734.52	346	12372.6	346	8692.08
347	2880.87	347	2724.37	347	9635.24	347	10568.6	347	10407.8	347	6506.05	347	11226.8	347	8099.59
348	3347.98	348	3599.75	348	9311.44	348	10952.4	348	9901.65	348	6179.47	348	11029.2	348	7653.94
349	3701.58	349	3919.33	349	17743.5	349	19575	349	9199.28	349	5594.8	349	13166.9	349	9041.12
350	4922.17	350	4900.55	350	22711.6	350	23487.9	350	8565.19	350	3889.93	350	13192.2	350	9858.3
351	5750.4	351	6188.75	351	21736.2	351	15942.2	351	10627.2	351	5850.31	351	14818.2	351	9487.26
352	8235.93	352	8000.56	352	22855.3	352	18415.1	352	11241.3	352	7548.09	352	13211.5	352	8226.24
353	10780.7	353	9650.73	353	21777.1	353	16506.6	353	10185.1	353	6887.7	353	12162.9	353	7858.39
354	12809.6	354	10650.8	354	24487.9	354	22177.2	354	9699.37	354	6010.69	354	12460.4	354	9037.87
355	14010.5	355	9053.51	355	21597.5	355	23965.9	355	8861.6	355	5725.4	355	14591.8	355	10670.8
356	15242.8	356	9279.75	356	15571.4	356	19613.5	356	8231.7	356	4873.05	356	15687.3	356	10734.6
357	14301.3	357	8560.79	357	14436.5	357	17380.7	357	6866.23	357	2972.56	357	16031.8	357	11089.7
358	13871.3	358	8237.18	358	15480.8	358	20098.7	358	5913.17	358	4620.88	358	16078	358	11005.5
359	11732.1	359	6429.91	359	9270.84	359	13614.1	359	5875.78	359	2705.02	359	13488.8	359	9871.76
360	10984.5	360	5734.58	360	6683.93	360	6309.52	360	5500.31	360	2742.01	360	13748	360	8002.22
361	14671.4	361	8214.06	361	9512.42	361	11336.7	361	5532.5	361	4984.99	361	17807	361	11895.1
362	12659.3	362	6915.32	362	13022.3	362	16078.8	362	4566.1	362	3675.68	362	20163.6	362	14281.5
363	12921.6	363	7315.11	363	16686.8	363	19616.2	363	4859.55	363	4336.78	363	22299.5	363	17156.7
364	13900.1	364	8306.31	364	20351	364	20726	364	6403.94	364	3706.41	364	21957.8	364	16100.8
365	13603.6	365	7853.7	365	20354.3	365	20933	365	7909.68	365	4597.55	365	20692	365	13228.9
366	14349.1	366	9157.39	366	21954.1	366	22522.9	366	8532.24	366	6091.63	366	20143.3	366	12319.6
367	14699	367	10360.9	367	27713.7	367	24181.6	367	8381	367	5989.9	367	18377.9	367	11214.7
368	12375	368	10577.7	368	29615.6	368	20846.8	368	8860.71	368	6064.39	368	16196.5	368	10182.7
369	10431.4	369	9166.82	369	27621.8	369	22315.5	369	8061.91	369	4729.89	369	16789.3	369	11032.2
370	8711.56	370	6337.57	370	30456	370	21488.5	370	7858.82	370	5180.99	370	16554.6	370	11648.3
371	5361.6	371	3342.24	371	29344.1	371	20011.3	371	7352.2	371	3776.82	371	15777.3	371	11426.7
372	6577.75	372	5047.16	372	24998.8	372	16061.6	372	7481.59	372	3566.49	372	14453	372	10142.3
373	5664.05	373	4561.47	373	23584.6	373	15032.3	373	8226.53	373	3199.09	373	14917.1	373	11978.9
374	6443.27	374	5157.51	374	25062.8	374	17060.4	374	8519.93	374	3962.41	374	18818.1	374	14143.7
375	6237.48	375	4352.69	375	29564.4	375	22690.6	375	9802.48	375	4568.8	375	18429.1	375	12659.4
376	4062.02	376	1918.13	376	28199.8	376	19519.9	376	9502.14	376	4656.38	376	17552.6	376	11730
377	3308.54	377	1707.3	377	26202.4	377	16454.9	377	9764.22	377	4551.58	377	16633.8	377	9501.67
378	5051.43	378	2157.42	378	30212.6	378	21424.8	378	9015.75	378	4040.58	378	15614.5	378	8332.97
379	5860.45	379	3623.42	379	32597.7	379	25311.8	379	8110.62	379	3640.71	379	13000.5	379	6146.13
380	5976.74	380	2837.61	380	28860.6	380	22721.4	380	6680.98	380	3864.47	380	10222.6	380	4809.27
381	8519.37	381	4654.48	381	32863.8	381	30801.9	381	6275.68	381	4827.8	381	8816.26	381	5443.99
382	9789.7	382	6397.8	382	31070.6	382	30649	382	6555.5	382	5701.59	382	8527.85	382	6563.76
383	10753.1	383	7243.79	383	33291.1	383	29617.2	383	7161.33	383	7387.67	383	10112	383	6383.84
384	9300.6	384	6308.63	384	34051.7	384	27246	384	6387.31	384	6587.32	384	9646.19	384	7268.33
385	5750.91	385	4398.17	385	39149.6	385	36680	385	7640.11	385	6028.8	385	12352.2	385	8096.44
386	6074.08	386	4671.67	386	34548.4	386	37516.3	386	8241.47	386	4832.99	386	11456.8	386	7770.76
387	7685.81	387	4688.58	387	38515	387	36298.5	387	8742.15	387	5449.59	387	11783.9	387	6844.39
388	6811.32	388	4439.27	388	41085.3	388	35556.1	388	8535.19	388	5920.72	388	11416.3	388	6353.09
389	7866.34	389	5342.85	389	40284.1	389	35655	389	8870.12	389	4922.66	389	12363.3	389	7436.41
390	10201.9	390	5666.19	390	35545.2	390	38201.4	390	8270.52	390	4162.83	390	12006.1	390	7364.99
391	7981.97	391	4961.89	391	33194	391	34118.6	391	7769.97	391	5046.89	391	11334.6	391	7171
392	6782.88	392	4363.71	392	38198.4	392	37841.4	392	6654.81	392	3600.86	392	11010.1	392	7156.79
393	8415.81	393	4647.6	393	41600.2	393	36575.1	393	7084.25	393	4981.98	393	12512.5	393	7705.78
394	12620.5	394	6048.34	394	40908	394	44127.4	394	7998.3	394	5670.25	394	14523.5	394	10025.9
395	11483.9	395	5278.26	395	40962.4	395	38103.9	395	8378.36	395	5510.29	395	14097.1	395	8796.53
396	15471.9	396	8466.21	396	45329	396	35822.9	396	8132.58	396	5280.05	396	12813	396	8353.33
397	13660.3	397	7859.69	397	42326.9	397	41736.8	397	8197.25	397	5421.59	397	15128.3	397	9417.76
398	16529.2	398	11056	398	41068.4	398	37022.2	398	8095.47	398	5469.93	398	14427	398	8880.72
399	15811.2	399	9491.43	399	41105.5	399	35285.1	399	8294.96	399	4839.2	399	14798.4	399	9245.19
400	13893.4	400	7143.67	400	40363	400	41785.6	400	8263.32	400	4492.07	400	16959	400	10939.4
401	11488.5	401	5959.22	401	39240.9	401	35782.1	401	7716.27	401	3859.09	401	18349.5	401	13983.5
402	8267.24	402	4510.87	402	37677.8	402	32868.6	402	6848.72	402	3626.69	402	15708.2	402	13729.5
403	8225.41	403	5176.94	403	36824.8	403	33739.6	403	6559.12	403	3521.91	403	15414.1	403	12674.8
404	10486.7	404	7015.33	404	37899.1	404	32932.4	404	6869.65	404	3700.6	404	10487	404	9608.41
405	10965.5	405	6955.36	405	35250.7	405	33981.4	405	6751.6	405	3290.07	405	7086.58	405	7516.5
406	11826.4	406	7914	406	30847.9	406	31144.1	406	4915.71	406	3251.99	406	3844.64	406	5630.81
407	13341.1	407	9453.25	407	33420.9	407	33019.9	407	3132.32	407	1585.01	407	5154.58	407	6139.01
408	17864.3	408	11627.5	408	29731.8	408	30764.9	408	2876.65	408	730.132	408	6934.54	408	6485.23
409	15305.6	409	10243.3	409	29218.5	409	27158.3	409	1522.1	409	536.696	409	9639.64	409	8231.24
410	11531.8	410	9614.67	410	30505	410	22880	410	481.131	410	714.232	410	9610.67	410	9159.35
411	9921.74	411	8773.06	411	27438.2	411	23977.7	411	695.803	411	997.844	411	11745.5	411	9720.29
412	10497.5	412	8548.97	412	28129.9	412	20543.4	412	294.38	412	1023	412	12226.8	412	8959.77
413	9662.1	413	7552.11	413	26111.9	413	18713.1	413	834.24	413	1568.38	413	11640.9	413	9052.71
414	10359	414	7008.44	414	22589.9	414	20172.7	414	1981.52	414	2706.39	414	11157.1	414	7906.72
415	11611.1	415	6965.03	415	24051.1	415	22787.8	415	2757.07	415	3879.14	415	9030.09	415	4688.12
416	11205.3	416	8110.07	416	20282.6	416	21076	416	4777.28	416	6159.93	416	7957.72	416	4420.03
417	12264.1	417	8180.46	417	21059.2	417	21967.4	417	4045.1	417	5647.59	417	7429.85	417	3636.53
418	12423.8	418	8937.06	418	21992.5	418	21174.1	418	3859.43	418	4606.61	418	5741.04	418	2818.94
419	11817.3	419	9152.78	419	22447	419	21518.5	419	2903.47	419	4788.82	419	5299.53	419	3184.1
420	10539.5	420	7254.22	420	20926	420	19862.6	420	1910.02	420	3436.45	420	5762.11	420	4332.67
421	10360.5	421	6088.35	421	18821.1	421	19278.8	421	2062.74	421	3503.95	421	6634.74	421	5880.1
422	10532	422	6316.35	422	20485.3	422	21261.6	422	1435.74	422	2347.83	422	8241.43	422	6984.05
423	9544.36	423	5268.44	423	21811.5	423	21946	423	1285.21	423	2524.16	423	9235.12	423	6616.69
424	9065.24	424	5894.61	424	19226.3	424	19355.4	424	1947.75	424	3496.16	424	9025.84	424	6736.83
425	8713.59	425	6032.03	425	21540.6	425	22535.5	425	4307.59	425	4081.88	425	8689.57	425	6212.6
426	8124.34	426	5805.87	426	19727.7	426	20693.8	426	5347.84	426	3698.03	426	8148.69	426	5850.17
427	8276.7	427	5791.61	427	19228.6	427	17927.3	427	6707.4	427	4379.58	427	7881.24	427	5049.76
428	8385.71	428	6059.52	428	20183.1	428	19906.2	428	6852.86	428	6321.79	428	7998.23	428	5154.56
429	9027.5	429	6243.26	429	18938.5	429	20938.9	429	8595.86	429	6604.6	429	7055.88	429	4554.28
430	8831.57	430	6135.62	430	17032.1	430	19917.1	430	8537.36	430	5759.68	430	6813.92	430	4029.52
431	8358.98	431	6451.58	431	14440.6	431	17007	431	8351.46	431	6305.61	431	6846.36	431	4025.46
432	7730.1	432	5901.06	432	16826.6	432	19873.3	432	8466.19	432	6484.75	432	7565.2	432	3518.87
433	8231.3	433	7999.51	433	20163.5	433	19531.6	433	5813.43	433	4311.18	433	12225.5	433	8244.75
434	8828.36	434	9070.17	434	20856.2	434	19038.3	434	2817.13	434	2164.17	434	14437	434	11038.4
435	9193.7	435	9181.25	435	20857.4	435	17774.4	435	1847.12	435	1958.49	435	11629.7	435	9934.36
436	8363.51	436	8167	436	19839.1	436	18123.3	436	1933.51	436	1964.57	436	11519.8	436	9357.51
437	6897.84	437	6275.34	437	18341.5	437	18053	437	1494.78	437	737.26	437	9016.28	437	6005.35
438	6190.74	438	4761.06	438	16995.6	438	17726.9	438	1512.45	438	1009.52	438	7224.72	438	4237.44
439	5692.99	439	5098.73	439	17267.2	439	17436.9	439	1996.08	439	1389.22	439	8108.88	439	4663.3
440	5492.72	440	5187.1	440	19077.5	440	18226.6	440	2786.72	440	958.018	440	6380.36	440	4141
441	5267.06	441	4830.23	441	20928	441	17860.8	441	3257.49	441	2185.6	441	6287	441	3793.36
442	4365.47	442	5051.55	442	21089.8	442	17740.1	442	4898.91	442	2275.9	442	8177.95	442	5620.15
443	4019.26	443	4380.36	443	22017.4	443	20979.6	443	6445.07	443	2654.06	443	8506.74	443	6377.23
444	3815.11	444	3333.6	444	22248.4	444	21427.2	444	7382.46	444	2399.97	444	8923.94	444	7093.57
445	4865.65	445	3916.85	445	23182.6	445	20494.1	445	7353.26	445	1616.65	445	8154.52	445	5740.95
446	5845.87	446	4837.21	446	22719.9	446	22196.5	446	6606.58	446	1693.22	446	8391.29	446	5122.45
447	6354.59	447	5739.87	447	21913.2	447	20392.8	447	7426.69	447	2046.72	447	9104.23	447	6070.03
448	5854.68	448	6196.25	448	20929.5	448	22457.3	448	7970.26	448	2206.42	448	10569.9	448	7924.55
449	4979.44	449	5582.61	449	18057	449	18957.2	449	6129.3	449	1498.61	449	11383.2	449	8937.8
450	4353.69	450	3985.8	450	17896.5	450	16988	450	4866.5	450	603.526	450	10899	450	9369.28
451	3785.05	451	3603.59	451	17577.3	451	16644.5	451	5222.23	451	2125.71	451	10267	451	9559.03
452	3334.93	452	2248.53	452	17345.7	452	15537.5	452	4493.54	452	2105.98	452	13762.3	452	10206.9
453	2552.51	453	2164.81	453	17360.8	453	15493.4	453	4291.08	453	1832.2	453	12698.7	453	8761.66
454	3299.86	454	2922.02	454	17502.9	454	15403.7	454	4457.2	454	2959.42	454	12443.5	454	8417.76
455	4013.86	455	2929.95	455	16956.7	455	16812	455	4606.99	455	2760.74	455	11964.1	455	7494.02
456	4051.82	456	2339.51	456	18764.8	456	15031.7	456	4751.08	456	3135.08	456	11593.6	456	7597.18
457	5790.52	457	3215.86	457	17752.9	457	14630.3	457	5089.42	457	3718.93	457	12033	457	9260.53
458	8156.45	458	4192.46	458	17863.6	458	14632.2	458	5834.14	458	5067.31	458	10006.6	458	9459.95
459	9967.15	459	4963.32	459	18032.5	459	16291.2	459	7292.01	459	5918.45	459	10280	459	11338.7
460	11416.5	460	5986.75	460	17052.9	460	14397.7	460	7160.07	460	6044.14	460	9810.94	460	10362.9
461	12569.5	461	6432.39	461	15889.1	461	14000.2	461	5908.15	461	5417.94	461	12150.2	461	10501.9
462	13492.4	462	6062.83	462	16909.7	462	16726.9	462	6482.34	462	4855.29	462	12891.9	462	10675.6
463	14623.2	463	8081.77	463	14731.9	463	15376.6	463	4893.33	463	4185.49	463	16814.7	463	14838.6
464	16358.5	464	7555.75	464	14333.7	464	15386.5	464	4638.36	464	4299.82	464	16094.6	464	13228.2
465	16725	465	7675.21	465	13722.5	465	10183.8	465	5628.97	465	5491.73	465	16376.2	465	13382.2
466	16522.3	466	6428.9	466	12238.1	466	8937.59	466	5256.56	466	4466.74	466	16263.1	466	12994.6
467	17638.4	467	7671.71	467	11577.7	467	8824.31	467	5731.17	467	4631.14	467	14877.3	467	11674.6
468	17048.6	468	7793.97	468	11837.5	468	9519.38	468	6556.86	468	5400.27	468	14192	468	11202.5
469	17199.1	469	8636.93	469	10948	469	11324.5	469	6213.69	469	4824.38	469	13151.9	469	9456.98
470	16860.2	470	8995.76	470	10048.5	470	7889.14	470	7759.18	470	6329.24	470	10941.9	470	7607.93
471	17545.1	471	10777.5	471	10168.4	471	8612.99	471	9412.83	471	7240.78	471	6916.21	471	5480.4
472	16437.3	472	11031.9	472	10688.5	472	10379.3	472	9680.18	472	6881.61	472	6321.69	472	6816.66
473	15790.9	473	10888	473	9953.04	473	10220.1	473	9983.5	473	7889.83	473	6873.64	473	7681.46
474	11480.9	474	7988.08	474	10651	474	9732.91	474	9970.94	474	7656.33	474	6317.6	474	7072.39
475	10738.3	475	7193.98	475	11901.1	475	9929.95	475	9246.97	475	7568.61	475	5520.79	475	6907.44
476	13308.4	476	9162.71	476	13165.3	476	9524.78	476	8939.77	476	8116.97	476	5414.43	476	7098.63
477	14123.5	477	9929.33	477	11241.9	477	7224.21	477	10034.3	477	5571.99	477	7393.74	477	8734.93
478	14621.1	478	9459.76	478	8062.53	478	4598.7	478	10094.7	478	7833.39	478	15065.1	478	16309.3
479	14232.1	479	9206.73	479	9603.41	479	5297.87	479	11095.7	479	6083.88	479	13399.1	479	14074.7
480	15168.9	480	9691.88	480	6584.95	480	4165.74	480	11966.7	480	7166.86	480	15320.2	480	14346.2
481	14593.7	481	8743.89	481	3998.05	481	2394.99	481	12843.5	481	8044.38	481	15719.1	481	13509.9
482	13157.6	482	9065.45	482	5377.63	482	3301.4	482	12145.2	482	6730.26	482	14444.8	482	11766.1
483	10135.7	483	8192.26	483	3324.91	483	2766.34	483	11250.2	483	7396.64	483	12964.1	483	10918.5
484	7273.25	484	6447.31	484	2834.09	484	2224.54	484	9804.53	484	9027.34	484	11074.4	484	9656.77
485	8062.45	485	6651.23	485	3687.96	485	2591.82	485	8558.24	485	9210.47	485	7112.88	485	5447.7
486	8973.09	486	6747.98	486	3124.2	486	2193.19	486	8659.62	486	9772.58	486	4980.43	486	3799.84
487	8337.42	487	5909.24	487	1625.18	487	1325.06	487	8185.21	487	9196.55	487	3523.06	487	2707.28
488	9056.9	488	5928.12	488	1169.37	488	1095.84	488	10065.7	488	9931.97	488	5010.79	488	5587.7
489	8721.69	489	5803.22	489	1343.52	489	528.05	489	9610.91	489	9739.39	489	6660.82	489	7247.76
490	8572.81	490	5440.9	490	1582.19	490	1131.21	490	8743.43	490	9213	490	6094.96	490	6812.47
491	8743.31	491	5999.09	491	1537.67	491	1689.06	491	11909.3	491	9816.93	491	6621.18	491	6870.28
492	9022.73	492	7373.81	492	1757.07	492	2816.46	492	10292.3	492	9522.67	492	9581.62	492	8998.4
493	9009.35	493	7017.8	493	1163.92	493	2002.9	493	9456.99	493	8091.08	493	8633.62	493	7530.89
494	9070.25	494	5806.83	494	953.515	494	1621.25	494	9878.7	494	8217.48	494	9897.12	494	8542.9
495	9137.85	495	5637.17	495	1412.76	495	1176.52	495	8423.64	495	8203.3	495	8618.92	495	8142.59
496	8320.56	496	3795.19	496	2027.55	496	2469.79	496	7879.32	496	5440.84	496	10142.4	496	8921.46
497	11017.5	497	5821.61	497	2658.2	497	2724.16	497	7569.03	497	5432.16	497	9693.28	497	9049.9
498	11517.3	498	7096.75	498	4847.74	498	4809.31	498	6776.09	498	5547.05	498	9017.17	498	8787.36
499	12089.4	499	7292.41	499	6593.82	499	5279.87	499	7490.25	499	6615.31	499	8991.78	499	8719.69
500	12403.7	500	8087.88	500	8265.53	500	6752.76	500	7056.32	500	5679.69	500	8447.89	500	8545.24
501	11672.7	501	8036.41	501	10067.2	501	7016.39	501	6953.28	501	4964.75	501	8177.07	501	8161.85
502	11819.4	502	8703.84	502	12464.6	502	9008.01	502	5510.24	502	5487.49	502	8389.75	502	7451.51
503	12296.7	503	7920.24	503	12682.1	503	8847.82	503	8018.73	503	8833.52	503	8802.54	503	6753.03
504	12066.6	504	8103.47	504	13052.1	504	12062.4	504	8025.36	504	9084.55	504	9444.73	504	6377.99
505	10452.6	505	5643.12	505	9172.5	505	5513.95	505	8978.65	505	8009.21	505	10047.5	505	6806.53
506	10052.7	506	5757.7	506	10394.9	506	7450.87	506	8773.96	506	7364.98	506	10433.9	506	7114.36
507	11214.9	507	6463.41	507	11187.2	507	8704.26	507	9324.9	507	7141.69	507	11094.4	507	8781.46
508	11887.3	508	8292.42	508	10207.9	508	10100.3	508	8269.75	508	6784.56	508	11059.6	508	9499.58
509	11168	509	8499.82	509	8257.77	509	7958.51	509	9019.03	509	6196.05	509	10699.2	509	9934.28
510	10476.3	510	7777.82	510	7080.82	510	5745.87	510	8106.02	510	5555.77	510	10332.2	510	10442.5
511	9999.83	511	7182.2	511	6476.7	511	5277.18	511	7933.65	511	5861.58	511	9294.45	511	9122.38
512	10187.8	512	7387.48	512	6584.56	512	5561.96	512	8519.87	512	5647.85	512	9131.89	512	9360.46
513	11004.6	513	8019.46	513	7774.45	513	4581.5	513	9484.65	513	4958.16	513	8180.29	513	8363.7
514	11862.9	514	8173.19	514	8758.59	514	5422.4	514	10072.3	514	6314.15	514	6523.52	514	6000.63
515	12684.6	515	8677.39	515	8921.92	515	5456.1	515	9632.72	515	7896.1	515	5812.09	515	4990.66
516	9024.81	516	6266.73	516	9647.97	516	4134.73	516	9217.08	516	6864.45	516	5534.38	516	4546.81
517	7536.25	517	5554.04	517	9931.77	517	5266.23	517	9744.45	517	4132.46	517	6129.65	517	5405.39
518	6424.46	518	5281.94	518	11478.7	518	7012.92	518	10032.3	518	3519.72	518	6063.14	518	5539.43
519	7723	519	6739.3	519	11641.6	519	8762.12	519	11199.2	519	4996.35	519	6572.28	519	6467.38
520	7858.65	520	7342.72	520	11297.5	520	9654.61	520	9522.32	520	3187.45	520	5980.81	520	6233.67
521	10629.7	521	9123.22	521	10289.7	521	9201.99	521	10108.1	521	4511.24	521	6017.69	521	5875.61
522	10041.9	522	8469.76	522	9776.79	522	8992.3	522	6227.08	522	2934.85	522	6973.73	522	6285.77
523	14653.3	523	11928.6	523	9358.45	523	7659.99	523	7773.54	523	4227.11	523	7157.43	523	5452.7
524	15367.1	524	9284.03	524	10963.8	524	8647.78	524	6195.08	524	4105.77	524	8132.43	524	6129.17
525	15046.1	525	8347.75	525	8924.53	525	6145.58	525	4950.33	525	2699.32	525	8899.22	525	6228.49
526	14768.8	526	8118.01	526	5837.17	526	4465.8	526	4693.64	526	2188.71	526	10915.7	526	7364.79
527	12356.4	527	7286.73	527	4711.98	527	5625.98	527	4104.37	527	1990.26	527	11194.2	527	7728.4
528	8706.34	528	4857.55	528	4214.68	528	5012.53	528	4996.52	528	2290.65	528	12512	528	9078.53
529	8174.86	529	5364.89	529	3932.24	529	3493.79	529	6102.12	529	3458.47	529	13635	529	10521.5
530	7148.01	530	4948.26	530	2250.69	530	3473.92	530	8041.34	530	4151.04	530	14168.5	530	10236
531	6574.04	531	3473.59	531	2403.97	531	1997.13	531	8107.78	531	5817.57	531	14292.6	531	10646.4
532	7318.9	532	3504.58	532	3344.39	532	3615.85	532	7954.31	532	6098.11	532	15106.6	532	10902.3
533	6548.68	533	4102.07	533	978.025	533	2387.32	533	7609.65	533	5400.27	533	15818	533	12155.7
534	9582.85	534	4718.35	534	466.817	534	1551.71	534	7667.59	534	5761.01	534	15289.7	534	13896.8
535	14587.2	535	8230.19	535	407.15	535	1233.12	535	8493.63	535	7453	535	15867.4	535	13599
536	18893.9	536	9966.57	536	340.021	536	296.618	536	8557.76	536	6810.24	536	15403.3	536	13606.7
537	20029.3	537	9892.55	537	107.225	537	864.68	537	9314.95	537	7633.98	537	13092	537	10018.3
538	27704.8	538	13429.8	538	967.61	538	286.002	538	8891.43	538	7863.72	538	13124.4	538	12267
539	21391.3	539	11245	539	875.527	539	495.785	539	8556.82	539	8614.13	539	11950.9	539	11883.7
540	16718.2	540	8751.71	540	2937.61	540	361.065	540	8310.08	540	7018.15	540	12543.6	540	11471
541	13735.1	541	6081.57	541	3095.55	541	696.477	541	8418.22	541	5514.57	541	10992.4	541	10356
542	12711.1	542	5895.84	542	4290.69	542	2313.16	542	8536.62	542	5139.83	542	10510.2	542	9226.62
543	11317	543	4631.26	543	5426.91	543	3550.25	543	7787.38	543	5247.09	543	8538.66	543	7581.23
544	12014.3	544	5483.6	544	5922.43	544	4016.95	544	7739.51	544	4168.21	544	8939.25	544	7809.52
545	15113.8	545	7227.22	545	7988.99	545	6171.93	545	8131.88	545	3848.4	545	9074.23	545	6602.13
546	18825.9	546	9025.88	546	6574.45	546	4973.92	546	8693.39	546	3881.12	546	8850.54	546	6868.48
547	16553.8	547	9089.5	547	8046.98	547	5988.86	547	10459.8	547	5130.03	547	9452.03	547	6249.91
548	14976.9	548	8095.06	548	6713.2	548	4559.51	548	11337.4	548	5347.62	548	12168.3	548	7406.72
549	15481.5	549	7508.63	549	6649.72	549	5203.84	549	12692.4	549	7302.18	549	11122.2	549	7295.32
550	17717	550	7350.04	550	8291.11	550	5035.67	550	11902.2	550	7235.61	550	12447	550	8431.42
551	19322.7	551	7905.62	551	10093	551	6138.88	551	11365.5	551	8619.84	551	13587.8	551	9486.26
552	17675.8	552	7369.25	552	8577.3	552	4331.93	552	8799.26	552	7374.25	552	11647.8	552	8261.87
553	14934.9	553	6239.58	553	10388.9	553	7180.96	553	8297.82	553	6350.79	553	10143.8	553	7948.19
554	19453.7	554	10553.2	554	10980.5	554	8244.54	554	5661.66	554	4803.12	554	10282	554	7773.75
555	21813.5	555	12216.8	555	11190.7	555	9972.58	555	5551.4	555	4086.12	555	10565.1	555	7125.82
556	23628.6	556	11851	556	10727.8	556	8988.18	556	4403.02	556	3759.47	556	10348.7	556	6335.39
557	24375.1	557	12184.7	557	9242.28	557	7393.24	557	3841.75	557	3507.04	557	11568.7	557	6565.91
558	21357.5	558	9058	558	7872.68	558	4750.36	558	2794.97	558	2150.6	558	10932	558	5671.82
559	19230.2	559	8565.42	559	7108.94	559	4638.89	559	2863.78	559	3995.54	559	14108.6	559	9415.89
560	20426	560	9665.31	560	7911.63	560	4321.64	560	2224.39	560	3080.36	560	14481.3	560	8678.74
561	20742.3	561	9799.28	561	6683.3	561	4155.5	561	1601.63	561	2103.86	561	16756.5	561	10263.5
562	15162.9	562	7162.9	562	6348.43	562	4630.7	562	2709.67	562	2151.07	562	15393.6	562	8263.4
563	12954.5	563	6556.57	563	4737.68	563	3515.65	563	2967.25	563	2042.88	563	11300.1	563	5594.45
564	13475.6	564	5798.51	564	4840.65	564	2917.55	564	4095.24	564	1831.57	564	11553.1	564	7130.41
565	12544.4	565	5459.12	565	4107.16	565	2499.84	565	4439.74	565	2333.66	565	12553.5	565	10383.2
566	15598.7	566	8826.32	566	2630.88	566	2035.15	566	3606.2	566	1457.81	566	10272.5	566	7913.66
567	18666.3	567	11631	567	2178.18	567	1423.67	567	3872.86	567	2176.19	567	10660.9	567	9729.65
568	23706.3	568	13733.5	568	1979.47	568	1176.84	568	7139.68	568	6013.58	568	13639.4	568	14302.3
569	25084.7	569	13311.9	569	2043.82	569	1154.62	569	5983.69	569	4585.06	569	13326.1	569	13680.8
570	23450	570	11701.4	570	2676.02	570	1296.75	570	6232.48	570	3999.55	570	12639.9	570	12964.8
571	20449.3	571	8924.13	571	2014.23	571	1588.44	571	4700.71	571	3301.68	571	14111.5	571	12628.7
572	20950.2	572	8734.53	572	2533.57	572	1890.42	572	5447.15	572	2589.51	572	13988.8	572	12275.7
573	18020.9	573	6064.72	573	2923.76	573	1544.08	573	5890.69	573	3160.36	573	14970.3	573	13227.4
574	7963.56	574	2321.42	574	3110.49	574	1443.31	574	5755.34	574	3406.91	574	15198	574	13568.9
575	4880.04	575	1867.32	575	3153.85	575	1720.51	575	6959.53	575	4239.84	575	14595.1	575	13223.8
576	3133.86	576	1722.05	576	3550.39	576	1532.7	576	7968.45	576	5742.44	576	14172.6	576	13835.8
577	1716.19	577	1049.41	577	4025.26	577	1695.48	577	7811.04	577	4773.18	577	16516.5	577	14697
578	4233.87	578	2733.81	578	4097.43	578	2434.62	578	5801.91	578	3646.92	578	16988.9	578	13663.9
579	2267.6	579	1428.12	579	4227.06	579	1708.85	579	4260.57	579	2637.24	579	17002.2	579	14027.5
580	1585.28	580	1846.24	580	3723.23	580	1841.57	580	3515.88	580	2286.76	580	15779.9	580	11083.5
581	3893.34	581	3768.71	581	2406.32	581	1605.18	581	3173.89	581	3727.37	581	15763.5	581	10938.4
582	8274.77	582	5894.44	582	3343.32	582	1620.6	582	3842.67	582	5463.86	582	15980.6	582	13728.6
583	13880.2	583	9494.14	583	3353.14	583	1877.28	583	4611.11	583	7301.77	583	13582.9	583	11779.2
584	19564.8	584	12528.5	584	4016.22	584	2718.3	584	5964.9	584	6888.12	584	10686.9	584	9924.74
585	22441.1	585	12179.8	585	4878.63	585	1691.33	585	5426.1	585	7003.6	585	9496.54	585	8735.71
586	21387.4	586	11496.6	586	5126.05	586	3128.35	586	6398.34	586	5600.53	586	9925.47	586	8519.67
587	16110.2	587	7415.85	587	7231.4	587	3351.23	587	6213.48	587	2769.23	587	10850	587	9669.71
588	10814.4	588	6378.73	588	9106.22	588	4970.6	588	6726.52	588	3719.76	588	11422.9	588	10172.2
589	11512.9	589	8152.9	589	7288.25	589	4350.1	589	6718.87	589	3475.7	589	12732.5	589	10066.4
590	9503.37	590	6949.3	590	5112.58	590	3631.29	590	6201.5	590	2793.4	590	13340.6	590	9744.63
591	9707.8	591	7292.77	591	5094.57	591	3568.67	591	9378.59	591	6285.81	591	15776.4	591	11107.5
592	8332.66	592	5882.79	592	4151.38	592	2529.89	592	8799.8	592	5536.9	592	17730.2	592	12686.9
593	11322.4	593	6772.96	593	4614.02	593	2586.39	593	10180.7	593	5093.8	593	17800.6	593	13282.9
594	7816.4	594	4515.85	594	4266.36	594	3233.43	594	10354.3	594	4080.38	594	15427.4	594	10717.7
595	5148.35	595	3238.15	595	4445.83	595	2432.38	595	9871.31	595	3562.35	595	13679.4	595	9612.67
596	5814.85	596	4271.57	596	4529.23	596	2083.34	596	8460.38	596	4034.9	596	14899.9	596	10624.6
597	5715.72	597	4817.51	597	5408.06	597	2229.53	597	8559.66	597	4837.96	597	13269.1	597	9891.85
598	8642.99	598	7457.96	598	4288.63	598	1665.62	598	8283.48	598	5077.02	598	12740.3	598	9568.25
599	7790.2	599	6786.15	599	3262.18	599	2570.49	599	9678.6	599	5849.07	599	13396.3	599	10889.1
600	7191.6	600	5251.98	600	4244.7	600	3191.88	600	9160.71	600	4644.46	600	13327.5	600	9847.62
601	5827.03	601	4088	601	2117.44	601	2160.17	601	8430.15	601	5440.04	601	13048.3	601	9498.38
602	5024.08	602	3493.51	602	3211.48	602	2368.32	602	8244.69	602	5928.4	602	14025	602	10207.8
603	5675.65	603	4105.18	603	2395.76	603	2176.89	603	7797.32	603	5158.81	603	17122.4	603	12162.9
604	7980.35	604	5616.28	604	1750.85	604	1360.38	604	6117.28	604	4074.28	604	18581.2	604	13165.9
605	11816.9	605	7430.36	605	1477.09	605	1154.02	605	5222.72	605	3554.57	605	20765	605	14140.1
606	15998	606	9789.66	606	1573.47	606	503.567	606	4761.44	606	3374.6	606	20675.8	606	14686.8
607	19359.2	607	12749.2	607	2327.3	607	832.047	607	4692.23	607	3486.12	607	21775.2	607	14835.2
608	21087.1	608	14982.3	608	2801.13	608	1193.53	608	4973.07	608	3994.32	608	20346.3	608	14363.3
609	20272.7	609	14940.5	609	3806.45	609	1302.52	609	4935.88	609	4496.4	609	17334.6	609	10809.9
610	17295.7	610	11579	610	4159.22	610	1772.45	610	5239.64	610	4265.6	610	18678.3	610	12561.5
611	14814.8	611	8944.07	611	4819.07	611	2723.94	611	4763.62	611	5337.47	611	15665.8	611	10328.3
612	13723.8	612	7612.74	612	5900.75	612	2999.41	612	5017.18	612	4315.77	612	13736.9	612	9561.27
613	11979.6	613	6453.97	613	6132.35	613	3158.67	613	6208.74	613	5871.95	613	14269.2	613	8955.18
614	10589.1	614	5992.53	614	7545.07	614	4171.72	614	7426.37	614	6605.78	614	14171.2	614	7983.78
615	10019.9	615	5534.71	615	8336.8	615	3986.01	615	7722.77	615	7374.88	615	13568.7	615	6876.41
616	9135.03	616	5172.53	616	9965.16	616	4789.62	616	6958.47	616	7562.76	616	14806.5	616	8898.95
617	7991.02	617	4480.85	617	8599.49	617	5123.51	617	6741.5	617	7123.69	617	14634.2	617	8541.77
618	8475.12	618	6024.11	618	6302.38	618	3766.88	618	6625.31	618	6561.43	618	15166.8	618	9543
619	9321.01	619	7455.43	619	4892.94	619	4118.48	619	5800.15	619	3849.74	619	16149.3	619	10604.2
620	8894.5	620	7027.3	620	3016.25	620	3497.96	620	4505.72	620	2662.8	620	18170.4	620	12093.1
621	7015.04	621	5816.78	621	3049.34	621	4920.03	621	6697.35	621	6952.39	621	16844.9	621	10967.7
622	5981.04	622	5085.68	622	3126.57	622	5485.71	622	6486.75	622	8977.25	622	18090.4	622	11291.5
623	5569.17	623	5045.83	623	3396.6	623	4839.94	623	5160.98	623	8506.26	623	19422.3	623	11986.6
624	5466.17	624	5220.67	624	3980.88	624	6073.09	624	4557.27	624	5237.68	624	19553.5	624	11616.4
625	5539.74	625	5767.47	625	4855.68	625	6272.96	625	4908.09	625	4358.49	625	18376.3	625	10991.6
626	10031.9	626	9555.53	626	6213.49	626	8192.68	626	7006.31	626	4519.1	626	18473.2	626	12323.2
627	12496.1	627	11128.9	627	6888.78	627	7867.62	627	9460.43	627	6108.45	627	19180.6	627	13159.4
628	12886.1	628	11479.3	628	8037.86	628	8062.14	628	10855.5	628	7361.98	628	16061.9	628	11287.1
629	14569.4	629	12965.8	629	7702.04	629	7288.29	629	9773.38	629	6611.24	629	18788.6	629	13001.5
630	15845.1	630	14131.4	630	7749.34	630	7909.48	630	8527.92	630	5192.41	630	19042.6	630	13849.4
631	16835	631	13972.6	631	7442.55	631	6867.66	631	6326.15	631	4358.3	631	18553.1	631	14232.2
632	17502.9	632	13636.4	632	7138.01	632	6597.1	632	5693.66	632	6778.64	632	20258.8	632	15105
633	16974.6	633	11571.9	633	6747.34	633	6132.95	633	4995.69	633	4349.35	633	19442.4	633	14191.3
634	16852.7	634	13116.9	634	6363.04	634	5792.67	634	4196.32	634	3864.36	634	21840.6	634	13842.5
635	16741.5	635	11478.5	635	5849.66	635	5330.35	635	2733.95	635	3267.51	635	23229	635	14205.4
636	16126.7	636	9541.39	636	5448.4	636	5034.16	636	2544.34	636	2141.49	636	24562.4	636	15815.6
637	16346.4	637	9678.47	637	5308.39	637	4039.93	637	3252.48	637	2548.02	637	24397.6	637	16185.7
638	15797	638	9227.76	638	5209.26	638	3299.52	638	3984.51	638	2967.53	638	27930.9	638	17946.2
639	16386	639	9766.19	639	6215	639	5438.39	639	2868.83	639	1483.76	639	28137.8	639	17761.6
640	16055.1	640	9344.54	640	8124.62	640	6228.26	640	4892.3	640	3107.76	640	26786.9	640	17037.5
641	14596.8	641	7793.6	641	8431.53	641	6733.03	641	5794.48	641	4941.96	641	23512.4	641	14482.7
642	15751.5	642	8777.39	642	9096.67	642	6862.79	642	6443.35	642	4998.4	642	17701.5	642	10661.4
643	15570.2	643	9729.46	643	9351.42	643	7068.65	643	5670.98	643	4158.2	643	16399.4	643	9890.14
644	14745.6	644	8945.52	644	9057.62	644	5841.14	644	7136.75	644	4624.94	644	14494.2	644	7633.19
645	14996.7	645	10145.9	645	8841.15	645	4490.12	645	6159.38	645	4465.85	645	13317.6	645	7475.64
646	15285.7	646	11517.9	646	8759.24	646	4122.82	646	7251.47	646	6268.29	646	13561.7	646	6732.23
647	14444.3	647	9315.08	647	8253.95	647	4076.27	647	9429.21	647	6749.54	647	11091	647	7098.58
648	13880.2	648	8715.99	648	8286.92	648	4144.57	648	10346.4	648	8048.85	648	9608.75	648	6383.92
649	14125	649	9156.83	649	7809.59	649	4480.33	649	9280.04	649	6868.62	649	9088.21	649	6590.18
650	14259	650	8306.34	650	6913.19	650	4610.69	650	7498.67	650	5218.58	650	8855.47	650	6491.27
651	14735.3	651	8322	651	7866.61	651	4769.82	651	8475.98	651	5580.54	651	10599.2	651	8250.24
652	15132.2	652	8629.48	652	8972.15	652	6060.86	652	5017.03	652	2256.65	652	12009.4	652	10199
653	14773.5	653	7821.93	653	7876.43	653	6444.64	653	2898.33	653	1664.12	653	11426.5	653	9615.78
654	15435.3	654	7883.44	654	6862.53	654	6479.29	654	1857.6	654	1409.62	654	10095.1	654	8612.29
655	16461.1	655	9168.56	655	5041.32	655	4225.83	655	4148.12	655	3818.29	655	8502.04	655	7677.67
656	15726.2	656	8246.81	656	2671.11	656	2565.92	656	6500.54	656	3279.85	656	8091.85	656	8076.91
657	17066.2	657	9330.2	657	2661.3	657	2963.86	657	6710.23	657	4187.18	657	8418.58	657	9001.19
658	15388.2	658	7831.2	658	2549.01	658	2868.79	658	9266.27	658	6818.19	658	8206.25	658	7957.32
659	15151.5	659	8170.02	659	3768.64	659	3478.05	659	9368.85	659	7708.16	659	8665.53	659	7067.02
660	16430.7	660	9288.94	660	2688.38	660	2799.02	660	10272.3	660	7012.46	660	8752.9	660	7145.53
661	16354.2	661	9553.43	661	4021.78	661	4285.32	661	10904.6	661	6533.09	661	10036	661	7589.83
662	15582.9	662	9667.09	662	5726.35	662	6002.89	662	10688.5	662	6318.37	662	12572.2	662	9143.56
663	16829.6	663	10356.5	663	3639.96	663	4841.67	663	9908.34	663	4749.67	663	13558.4	663	10096.4
664	16118.9	664	10381.5	664	3678.58	664	3940.61	664	9388.7	664	5063.52	664	15503.2	664	10819.7
665	15430.2	665	10298.9	665	1627.91	665	2044.92	665	8525.67	665	6307.73	665	17713.9	665	11606.7
666	14976	666	8918.75	666	793.547	666	861.906	666	9047.46	666	5270	666	17212.2	666	11131.7
667	15060.5	667	9379.22	667	1003.25	667	1172.07	667	8408	667	5551.12	667	17501	667	11057.5
668	15023.6	668	9256.78	668	1358.05	668	1882.69	668	7925.23	668	4816	668	17097	668	10901.5
669	15185	669	10729.1	669	1149.28	669	1720.2	669	7952.1	669	4420.18	669	17457.7	669	10545.5
670	15097.2	670	10416.9	670	1728.05	670	3113.47	670	7895.36	670	4476.65	670	18171.2	670	10614
671	15527.7	671	11391.7	671	1102.38	671	3127.38	671	8470.93	671	4772.47	671	18397.5	671	10719
672	15819.9	672	11168.9	672	959.176	672	2259.97	672	8231.3	672	4367.36	672	16413.1	672	10106.2
673	16150.4	673	11078.8	673	1794.16	673	2229.82	673	7896.39	673	2705.35	673	16350.8	673	10313.2
674	16279.7	674	11073	674	1591.01	674	1899.65	674	6829.28	674	1666.09	674	15096.3	674	9147.77
675	17394.8	675	12433.4	675	2337.91	675	2813.07	675	6109.27	675	1858.61	675	16001.7	675	10420.8
676	18404.2	676	12397.5	676	3861.81	676	4256.28	676	6311.25	676	886.754	676	14565.7	676	9718.89
677	16323.9	677	8620.67	677	5281.89	677	5341.12	677	8846.58	677	3225.71	677	14108.6	677	8558.93
678	17376.5	678	9534.21	678	3190.88	678	3263.63	678	8786.26	678	3681.48	678	15019.8	678	9152.67
679	19479.8	679	11731.6	679	4820.82	679	3863.72	679	10296.8	679	4700.19	679	17243.2	679	9616.79
680	19070	680	11799.1	680	4319.9	680	4214.14	680	11329.7	680	6131.97	680	18477.7	680	10355.6
681	19836.4	681	13224	681	3154.38	681	2421.13	681	11579.6	681	7419.95	681	20712.7	681	12150.8
682	18710.7	682	11246.4	682	3018	682	3208.74	682	11800.8	682	8584.85	682	21742.1	682	13255.5
683	20069.2	683	13027	683	2685.51	683	3576.6	683	13249.5	683	8546.31	683	22486.1	683	13247.7
684	21909.7	684	13936.8	684	2784.45	684	3170.91	684	12348.9	684	6768.32	684	23630.1	684	13558.7
685	22481.8	685	12825.4	685	2029.61	685	3296.11	685	11213.3	685	5383.22	685	24814.8	685	15028.2
686	20863.2	686	11316.6	686	547.011	686	1386.92	686	9266.39	686	5227.33	686	25833.2	686	15491.7
687	21333.5	687	12131.4	687	1349.98	687	2372.86	687	7796.55	687	5004.27	687	26822.4	687	15407.6
688	23121.2	688	14078.3	688	2329.83	688	2523.97	688	6988.82	688	4627.66	688	28902	688	16323.6
689	22518	689	14413.1	689	2734.76	689	1908.02	689	8527.52	689	6402.74	689	30312.3	689	17853.1
690	20656.3	690	12497.6	690	3066.77	690	2021.61	690	9617.61	690	5509.45	690	30167.3	690	19703.5
691	20893.5	691	14277.8	691	1982.81	691	1671.74	691	9808.42	691	7251.3	691	25459.4	691	17350.8
692	21253.1	692	14263.9	692	2654.02	692	2468.12	692	8687.33	692	6568.24	692	22379.1	692	16002.8
693	21769.4	693	14327.8	693	3956.96	693	3820.43	693	8837.59	693	6166.43	693	17329.1	693	13268.9
694	21415.2	694	14801.2	694	3903.61	694	3014.96	694	8095.57	694	7650.99	694	23964.6	694	16507.8
695	21493.2	695	13648.2	695	5020.34	695	3936.84	695	7781.02	695	7602.79	695	27451	695	18124.9
696	22138.2	696	14895.3	696	6623.03	696	5271.2	696	8373.83	696	6461.1	696	27314.6	696	18194.9
697	22521.6	697	14155	697	4292.73	697	2985.52	697	8078.28	697	5391.85	697	23401.5	697	15183
698	22404.6	698	13798.2	698	5570	698	4749.23	698	8519.42	698	5026.46	698	23009.1	698	14897.9
699	22264.4	699	14533.3	699	5774.68	699	5506.69	699	10238.4	699	5696.83	699	20808.8	699	14807
700	21230.6	700	14255.8	700	4887.9	700	4109.2	700	10201.1	700	5469.95	700	19895	700	13222.9
701	21299.8	701	13376.5	701	3531.86	701	2426.75	701	10698.6	701	5636.84	701	20297.3	701	12110.9
702	19904.1	702	10803.1	702	3740.43	702	2679.34	702	7336.49	702	3664.86	702	20078.5	702	11705.7
703	20466.9	703	12477.1	703	4594.66	703	3420.93	703	6850.09	703	3624.12	703	19154	703	11592.5
704	20270.2	704	13989.1	704	4793.74	704	3838.34	704	7671.81	704	4543.88	704	17945.5	704	10683.5
705	19036.9	705	11770.6	705	5712.32	705	4620.64	705	9062.66	705	6590.96	705	18309.8	705	11112.5
706	17476.4	706	10891.5	706	6952.44	706	5096.58	706	10215.3	706	8367.11	706	17591.2	706	12182
707	18834.3	707	12307.9	707	8610.21	707	5793.39	707	10883.1	707	8923.1	707	14433	707	11645.7
708	20505.9	708	12929.7	708	10446	708	7038.37	708	11057.1	708	7201.52	708	14448.3	708	11290.4
709	19828.9	709	10270.3	709	11345	709	8123.1	709	11086.9	709	7063.88	709	14593.4	709	10221.2
710	18652.3	710	8767.13	710	10624.4	710	7025.92	710	10688.5	710	6698.21	710	13478.1	710	9717.85
711	21239.1	711	11278.6	711	12144	711	7942.67	711	9588.32	711	4760.7	711	15347.1	711	10419.6
712	22882	712	13543.2	712	10070.2	712	8009.75	712	9435.08	712	5043.91	712	13876.5	712	9740.71
713	22892.3	713	11667.8	713	9396.81	713	8467.55	713	9820.97	713	5611	713	16772	713	10694.2
714	24390.8	714	13965	714	10271.9	714	9915.72	714	10608.8	714	6803.49	714	17638.3	714	10399.4
715	27362.1	715	15856.6	715	9307.85	715	7711.63	715	11842.5	715	7998.54	715	17652	715	9935.38
716	30864.6	716	18042.7	716	9614.1	716	7652.73	716	14556.7	716	11079.8	716	17634.8	716	9598
717	34196	717	20117.2	717	9284.58	717	6432.93	717	14715.4	717	9433.17	717	17577.1	717	9056.43
718	37350.7	718	23820.2	718	8271.59	718	4829.48	718	17083.3	718	11529.7	718	16148.3	718	8473.4
719	36215.8	719	25279.9	719	7136.83	719	4230.83	719	16369.8	719	11354.9	719	15196.7	719	8521.6
720	30459.4	720	23379.3	720	5799.85	720	4079.36	720	16925.6	720	13068.9	720	14350	720	8033.27
721	33015	721	24489.3	721	5024.89	721	3572.61	721	16001.9	721	11591.6	721	13416.7	721	8221.38
722	27138.1	722	21231.1	722	4343.65	722	3806.22	722	15984.3	722	12627.2	722	14739.9	722	9382.11
723	19675.5	723	15531.6	723	4235.26	723	3743.38	723	13546.1	723	12800.1	723	16446.1	723	10257.8
724	29109.6	724	20222.2	724	3759.33	724	3204.57	724	11682.9	724	13030.3	724	17150.1	724	10225.8
725	21107.2	725	15459	725	5299.55	725	5266.68	725	10095.1	725	10149.6	725	15983.4	725	8795.58
726	17321.9	726	13228.3	726	4116.51	726	3114.48	726	9689.02	726	7795.82	726	17567.3	726	11414.8
727	23678.1	727	19087.8	727	3540.12	727	3146.87	727	11127.4	727	8085.66	727	19218	727	13149.3
728	21267.6	728	17201.2	728	3386.06	728	4094.53	728	11740	728	9267.58	728	19648.2	728	13127.2
729	16180.9	729	13937	729	4312.63	729	4742.6	729	9971.81	729	8238.7	729	21323.8	729	14178.8
730	23662.2	730	19362.4	730	5475.86	730	5760.67	730	9636.42	730	8897.74	730	22822.8	730	15313
731	25412.5	731	19214.9	731	6613.71	731	5963.3	731	10091.6	731	6616.12	731	23601.6	731	17126.6
732	22384.7	732	17712.6	732	6041.46	732	5108.98	732	11222.4	732	7119.95	732	24244.6	732	18174.5
733	19018.3	733	15875.5	733	6018.04	733	4893	733	8958.65	733	5793.2	733	24636.7	733	17965.1
734	23793.9	734	19211.6	734	5978.7	734	6132.93	734	7909.45	734	6620.42	734	24470.9	734	17492.8
735	31195.8	735	21355.7	735	6048.88	735	6311.76	735	7022.54	735	5150.22	735	24513.8	735	17776.1
736	26799.9	736	19053.5	736	6076.08	736	4930.13	736	6042.22	736	6426.76	736	23988.8	736	17820.9
737	23801.3	737	18600.1	737	5494	737	5571.55	737	5666.54	737	4507.23	737	25869.9	737	19562.2
738	28508.9	738	19555.8	738	5325.65	738	5493.95	738	4848.02	738	4054.61	738	25915.3	738	21447.5
739	26627.8	739	18402.7	739	5137.44	739	5763.47	739	4104.31	739	1999.75	739	23624.5	739	19351.1
740	24806.2	740	17808.5	740	2621.05	740	2834.43	740	3811.62	740	2265.29	740	22443.5	740	17376.4
741	25164.1	741	16768.2	741	2009.26	741	1900.4	741	2880.31	741	2606.28	741	20963.4	741	15285
742	24654.1	742	16532.4	742	2276.01	742	1532.25	742	3352.65	742	3103.89	742	13881.4	742	8644.04
743	25973.3	743	15689.7	743	2711.46	743	1675.52	743	4290.51	743	3805.61	743	15709.9	743	9681.21
744	24980.8	744	14091.5	744	3388.31	744	2499.5	744	4402.82	744	3326.8	744	14259.4	744	7849.17
745	24844.2	745	13121.1	745	4084.03	745	3705.06	745	5338.45	745	2930.94	745	17524.9	745	10542.2
746	23680.3	746	12600.9	746	4473.76	746	3683.51	746	6441.39	746	3088.74	746	18423.2	746	10245.8
747	17570.2	747	7704.36	747	5100.77	747	3477.05	747	7244.11	747	3345.76	747	19160	747	10479.7
748	17369.6	748	8114.63	748	5493.26	748	3602.71	748	7718.26	748	4334.63	748	19412.7	748	10559.5
749	20378.2	749	10449.9	749	6525.07	749	5112.78	749	6591.64	749	4613.16	749	18127.9	749	10323.2
750	14221.3	750	5187.16	750	6561.46	750	4310.08	750	5781.84	750	4080.63	750	17824.6	750	9624.35
751	7832.59	751	2322.25	751	6760.59	751	3776.84	751	4683.1	751	2956.04	751	18394.6	751	9057.37
752	13826.1	752	4887.57	752	7273.83	752	5376.3	752	4151.15	752	3110.62	752	16750	752	9242.58
753	19985.2	753	10249.4	753	7528.13	753	7146.14	753	5102.06	753	3761.86	753	18000.1	753	9359.43
754	13861.8	754	6387.81	754	6962.39	754	6473.21	754	5816.25	754	3955.52	754	17217.5	754	10904.9
755	15094.4	755	7461.73	755	6505.23	755	6735.9	755	7079.03	755	5141.55	755	16271.7	755	10015.6
756	19019.3	756	9573.27	756	6631.57	756	7933.3	756	6070.88	756	4543.83	756	16692.7	756	9441.76
757	23279.6	757	12606.9	757	6662.61	757	7279.66	757	5017.76	757	4122.06	757	17954.1	757	11264.5
758	26457.6	758	15708.1	758	6070.4	758	7216.83	758	5409.99	758	4399.31	758	17983.6	758	12218.1
759	24790.7	759	13409.8	759	5826.56	759	7580.03	759	5318.48	759	3608.92	759	17426.3	759	12862.9
760	25994.6	760	14470.8	760	7359.37	760	9169.87	760	5628.27	760	4248	760	17547.1	760	13158.5
761	21021.7	761	9399.73	761	7861.04	761	8196.56	761	6393.03	761	4712.7	761	18347.4	761	12954.5
762	25839.3	762	13945	762	10272.9	762	10025.9	762	7000.41	762	5429.57	762	18446.7	762	12646.7
763	25981.2	763	16934.8	763	10078.8	763	7336.01	763	7363.43	763	5307.85	763	18994.6	763	12437.5
764	26930.6	764	14401.6	764	9003.36	764	7787.82	764	7439.85	764	6062.2	764	18263.4	764	10692.2
765	23674.4	765	10312.4	765	9142.36	765	6050.3	765	8142.63	765	6435.34	765	17927.5	765	10448
766	21922.3	766	9546.14	766	9780.73	766	5819.53	766	8512.02	766	7766.31	766	19901	766	11021.6
767	24037.4	767	10970	767	7901.04	767	4200.24	767	8265.05	767	7229.77	767	19452.5	767	10479.6
768	23590.6	768	11707.3	768	6985.08	768	4306.19	768	7243.26	768	6150.13	768	20462.7	768	11652.6
769	23261	769	12902.4	769	6889.81	769	4437.42	769	5310.15	769	3104.56	769	18205.9	769	10668.4
770	22488.7	770	12825	770	7080.24	770	4853.82	770	4822.34	770	3571.53	770	16878.3	770	10887
771	23512.3	771	13592.7	771	7874.48	771	5559.97	771	3777.94	771	2061.45	771	14731.8	771	9135.85
772	22474.9	772	13050.6	772	8098.94	772	8473.27	772	4150.58	772	1972.65	772	12855.5	772	8301.1
773	19246.7	773	12543.5	773	8775.81	773	8246.39	773	5343.12	773	2906.84	773	10739.5	773	5774.11
774	13612.4	774	8830.92	774	9145.25	774	8249.7	774	5509.25	774	3226.04	774	10028.6	774	5871.97
775	14295.6	775	9172.45	775	10759.4	775	9800.09	775	5096.05	775	4128.28	775	9944.33	775	5649.42
776	12808.9	776	7893.74	776	11419.6	776	9910.9	776	4573.97	776	3258.97	776	8955.55	776	4831.73
777	10273.2	777	6517.41	777	12285.8	777	11407.6	777	4564.85	777	4058.94	777	8451.4	777	3940.42
778	8945.63	778	5645.41	778	13818.7	778	12603.2	778	4479.65	778	4120.15	778	9291.99	778	5118.44
779	7783.17	779	4570.52	779	13874.9	779	9931.8	779	5725.45	779	4398.53	779	14647.9	779	8417.78
780	6722.25	780	4272.65	780	12995.6	780	7738.62	780	6210.88	780	4902.6	780	14413.3	780	7119.25
781	6545.17	781	4544.34	781	11027.8	781	4998.19	781	9293.67	781	6923.94	781	15438.9	781	8388.22
782	7567.85	782	4283.83	782	10112.3	782	5458.23	782	9416.93	782	8934.48	782	15010.2	782	8449.77
783	10458.7	783	4368.4	783	9821.04	783	4556.31	783	10471.9	783	8103.49	783	11900.4	783	6145.6
784	12601.5	784	5407.61	784	7527.73	784	3417.37	784	11193.5	784	7478.39	784	13783.3	784	7215.36
785	14498.8	785	7650.39	785	5779.91	785	4845.75	785	10950.9	785	7417.22	785	13353.4	785	5751.6
786	15404.2	786	7344.15	786	4880.81	786	4874.28	786	10350	786	7862.72	786	13074.9	786	5071.14
787	15412	787	7888.54	787	8176.33	787	7190.59	787	11322.1	787	7178.44	787	15414.9	787	6495.55
788	15245.5	788	7804.9	788	10042	788	8513.01	788	10674.1	788	7636.51	788	17762.3	788	9523.81
789	15292.6	789	8582.24	789	9811.73	789	8545.54	789	9732.48	789	7823.82	789	16586.2	789	8876.88
790	19843.9	790	11031.9	790	8658.7	790	7307.32	790	9817.08	790	6878.6	790	15159.1	790	8081.08
791	20504.6	791	9935.85	791	8997.18	791	7761.35	791	8878.08	791	6572.09	791	13096.3	791	5942.75
792	20147.9	792	8974.07	792	11715	792	13407.5	792	7658.96	792	6636.1	792	13469.5	792	5594.81
793	15984.7	793	6078.04	793	9327.28	793	11101.6	793	6769.66	793	5392.97	793	14415.1	793	6650.74
794	14415.4	794	5589.75	794	9842.03	794	11975.2	794	6467.94	794	4950.22	794	15505.2	794	7826.27
795	13698.7	795	6520.82	795	9368.27	795	10728.4	795	6741.68	795	4939.71	795	14347.9	795	7889.02
796	16761.4	796	8917.79	796	8599.1	796	8519.94	796	6493.15	796	4339.56	796	14693.2	796	7698.88
797	14813.2	797	7781.06	797	10644	797	9681.69	797	5990.32	797	3441.19	797	15954.4	797	7966.9
798	14467.8	798	7789.99	798	9390.97	798	5876.53	798	5865.45	798	1344.78	798	16851.8	798	9140.07
799	12420.4	799	5221.08	799	8440.2	799	5210.16	799	5663.55	799	1494.54	799	15329.9	799	7381.93
800	14654.9	800	4994.7	800	7208.92	800	4744.52	800	5366.72	800	2131.78	800	12730.2	800	4249.38
801	19646.1	801	7421.93	801	7376	801	5198.21	801	6964.48	801	3759.9	801	11587.5	801	4148.16
802	18559.3	802	6826.37	802	5754.26	802	4939.63	802	7074.56	802	4030.47	802	11210.2	802	3485.14
803	18656.2	803	7785.58	803	4898.51	803	4882.62	803	8193.1	803	4946	803	9903.6	803	2716.92
804	19033.2	804	9851.52	804	6130.46	804	6252.94	804	7946.09	804	4005.71	804	10925.4	804	3614.22
805	19961.5	805	11763.1	805	5941.16	805	6006.59	805	7350.3	805	4741.78	805	11666.5	805	3511.83
806	17388.3	806	10214.6	806	7615.29	806	8620.04	806	6971.04	806	4423.93	806	12358.9	806	3955.05
807	17418.5	807	9759.1	807	5420.87	807	6934.37	807	6297.55	807	4171.29	807	12570.9	807	4003.54
808	14902	808	7404.31	808	5854.85	808	5908.53	808	5920.87	808	3284.55	808	12180.7	808	4087.55
809	14458	809	7044.09	809	5204.09	809	4985.8	809	5620.25	809	3856.43	809	12464.2	809	4926.23
810	13596.6	810	6311.71	810	6405.54	810	5441.4	810	5108.45	810	3484.38	810	13583.1	810	4294.27
811	12381.6	811	5172.78	811	9643.65	811	6528.9	811	5359.93	811	4068.99	811	13257.2	811	4790.68
812	12933.4	812	4595.79	812	9537.14	812	6949.03	812	4511.93	812	4121.88	812	12924	812	4296.02
813	12999.8	813	4014.41	813	10634.5	813	7615.78	813	4750.12	813	3568.82	813	14007	813	4635.97
814	15299.8	814	4994.75	814	13340	814	7198.78	814	4418.26	814	2959.57	814	13320.6	814	4381.35
815	16975.4	815	5453.83	815	11832.1	815	7509.88	815	4814.95	815	3477.55	815	14334	815	5039.91
816	17843.2	816	6347.77	816	9911.76	816	6425.03	816	5054.19	816	3181.33	816	14177.1	816	5466.64
817	18606.6	817	6405.85	817	10345.6	817	6693.19	817	6183.85	817	2424.49	817	13362.2	817	5139.88
818	18032.1	818	6531.24	818	8661.21	818	4642.59	818	6599.07	818	2127.22	818	12769.1	818	6056.98
819	17494.1	819	5578.96	819	8211.46	819	5505.15	819	7114.63	819	2910.76	819	10660	819	4830.38
820	17724.8	820	6052.67	820	7614.5	820	4533.02	820	6383.9	820	2960.2	820	10938.7	820	5248.91
821	16714.1	821	5642.55	821	6816.78	821	5108.59	821	5368.39	821	3687.42	821	11242.7	821	6558.94
822	15768.5	822	5691.76	822	6487.41	822	4161.4	822	4934.42	822	2724.78	822	11760.8	822	6553.21
823	16944	823	6395.39	823	8292.11	823	6772.33	823	4984.58	823	3684.52	823	12325.6	823	6191.58
824	17000.6	824	6971.78	824	8347.5	824	7606.64	824	5878.93	824	4232.42	824	12503.7	824	6187.88
825	19888.9	825	7860.98	825	8013.37	825	5650.69	825	5787.69	825	5037.79	825	12185.7	825	5635.87
826	18906.6	826	7867.51	826	8045.86	826	5253.75	826	6339.23	826	5705.91	826	12224.6	826	6238.31
827	16028	827	5438.4	827	7796.08	827	6552.78	827	7590	827	6165.6	827	12575.1	827	6648.18
828	12490.5	828	4276.52	828	8196.83	828	5883.6	828	8692.95	828	6303.45	828	13341.3	828	7589.23
829	10480	829	3502.57	829	8327.62	829	6258.25	829	8374.7	829	7651.36	829	15002.7	829	7958.55
830	9028.25	830	3613.96	830	8002.48	830	6736.06	830	8850.28	830	6659.35	830	14666.5	830	7421.27
831	6158.86	831	2478.46	831	8717.38	831	6821.45	831	9162.56	831	6617.69	831	16466.3	831	7222.77
832	4541.83	832	1848.14	832	9068.32	832	6913.95	832	9671.76	832	5850.96	832	18776.9	832	7960.1
833	4069.48	833	2236.52	833	9871.51	833	7638.4	833	8977.43	833	7232.81	833	20736.9	833	9727.81
834	5732.21	834	2802.19	834	9261.69	834	7514.14	834	9709.98	834	5630.7	834	20864.2	834	10436.2
835	6765.1	835	3477.69	835	9292.91	835	8668.86	835	9394.3	835	6853.34	835	17848.9	835	9490.05
836	8542.28	836	4461.75	836	9881.1	836	9527.34	836	9533.3	836	3077.43	836	18127.1	836	7962.18
837	10911.8	837	4913.57	837	9038.52	837	8913.83	837	8767.83	837	3583.77	837	19047.3	837	8732.22
838	10195.9	838	4906.76	838	7211.62	838	6912.66	838	8124.7	838	3885.49	838	18478.4	838	8565.76
839	8683.72	839	3582.17	839	10132.3	839	8529.3	839	7656.68	839	3902.93	839	17232.5	839	8355.77
840	8746.59	840	3261.44	840	9651	840	8362.43	840	7977.04	840	4341.01	840	18137.4	840	9831.99
841	7004.66	841	1719.74	841	7766.99	841	5837.84	841	8041.33	841	5358.03	841	17417.3	841	10302.4
842	5413.2	842	1088.17	842	8081.44	842	5351.16	842	7260.67	842	4541.69	842	17261.5	842	9922.66
843	3656.82	843	966.088	843	10772.1	843	7891.32	843	6344.05	843	3102.68	843	15808	843	9881.65
844	6898.94	844	1883.07	844	12954.9	844	10385.7	844	8911.68	844	5546.9	844	16518.5	844	10411.9
845	7874.01	845	2784.73	845	11446.7	845	8600.61	845	9887.05	845	6239.06	845	16561.6	845	10530.5
846	14225.2	846	4998.11	846	15556.4	846	11045.4	846	9720.99	846	6246.81	846	17693.8	846	10040.4
847	12352.8	847	4710.23	847	17560.3	847	11032.8	847	9171.05	847	5842.26	847	18896.7	847	10652.1
848	11494.7	848	4680.51	848	16497.6	848	9743.11	848	9208.4	848	5689.66	848	18543.8	848	10317
849	9403.8	849	4080.19	849	16201.1	849	9009.7	849	8425.42	849	5584.14	849	18568.8	849	9451.39
850	7771.67	850	3647.57	850	13752.5	850	8128.42	850	7184.37	850	5207.43	850	18714.8	850	8565.27
851	10331.9	851	5120.83	851	12477.4	851	10474.4	851	6760.33	851	5507.87	851	19672	851	9146.17
852	10961.8	852	6545.88	852	11287.5	852	8884.42	852	6522.74	852	4982.82	852	20234.8	852	9269.65
853	12068.7	853	7298.05	853	10349.3	853	9455.64	853	6692.2	853	4896.04	853	21512.9	853	10054.5
854	13579.2	854	8138.58	854	10764.9	854	8284.08	854	6945.65	854	4776.57	854	20736.8	854	10889.4
855	20785	855	12693.4	855	11063.3	855	6336.16	855	7554.28	855	5678.1	855	19153.6	855	10231.6
856	18881.2	856	11342.8	856	12279.2	856	6686.95	856	7411.77	856	4405.03	856	17977.5	856	9942.1
857	19951.6	857	10591.1	857	13465.9	857	7104.15	857	6830.25	857	5108.27	857	19061.5	857	10441.5
858	22065.9	858	12510.8	858	12595.4	858	7190.19	858	6389.29	858	4944.82	858	20933.1	858	10604.1
859	20583.4	859	12399.7	859	12454.7	859	6802.94	859	6854.87	859	5043.99	859	22709.7	859	11342.5
860	14218.3	860	10760.7	860	10781.1	860	7379.66	860	7347.27	860	5136.92	860	22853	860	11784.1
861	9660.75	861	8507.6	861	11447	861	8106.01	861	7665.55	861	6163.71	861	21860.9	861	11126.3
862	4062.76	862	4385.52	862	10923.7	862	8508.05	862	7744.63	862	5385.51	862	24182.8	862	12788.7
863	2353.15	863	2616.17	863	10073.7	863	8309.5	863	8723.34	863	5917.22	863	22881.8	863	11751.8
864	1250.37	864	857.8	864	9532.67	864	8714.72	864	8785.19	864	6482.5	864	22801.9	864	11438
865	3026.9	865	1986.92	865	9122.63	865	9458.3	865	9681.91	865	7879.95	865	20905.2	865	10376.2
866	3895.85	866	3091.79	866	7190.93	866	7841.01	866	9053.62	866	6050.14	866	16879.2	866	7776.5
867	3916.89	867	2477.21	867	9036.21	867	8124.85	867	10565.1	867	9458.74	867	17605.2	867	8389.96
868	5733.88	868	4415.39	868	8467.53	868	7164.63	868	11449.5	868	9516.74	868	18412.2	868	8737.26
869	6694.34	869	4276.62	869	7960.78	869	6364.24	869	12108.2	869	7065.85	869	19910.1	869	10044.1
870	6823.5	870	3377.37	870	8307.88	870	6011.38	870	11644.1	870	5561.68	870	18939.8	870	10651.1
871	8210.01	871	4011.6	871	8336.88	871	6473.56	871	11048.1	871	5747.51	871	16672.2	871	9684.86
872	9600.66	872	3619.08	872	9122.27	872	7443.98	872	10288.4	872	5846.32	872	17466.5	872	11158.6
873	10159.3	873	3286.19	873	8856.45	873	8084.41	873	9388.98	873	4969.44	873	16397.7	873	10619.5
874	13184.4	874	4745.19	874	9634.51	874	7651.84	874	8601.55	874	5112.25	874	17970.7	874	12261.1
875	14302.7	875	4539.73	875	9783.04	875	7869.76	875	7939.19	875	4733.1	875	17712.7	875	11575.7
876	17417.7	876	5678.57	876	8445.98	876	7589.36	876	7447.75	876	4287.04	876	18401.7	876	11561.5
877	15399.7	877	5157.9	877	6734.55	877	6274.75	877	7045.01	877	4107.9	877	17511.9	877	11255.2
878	11869	878	3863.28	878	6670.33	878	5198.29	878	7118.61	878	4397.3	878	17259.5	878	10194.9
879	14081	879	4621.34	879	7583.09	879	4086.16	879	6714.04	879	4196.39	879	18985.5	879	11572.4
880	14079.9	880	4269.65	880	9157.03	880	4164.94	880	7128.71	880	4471.86	880	20453.9	880	12164
881	12320.6	881	3688.34	881	10046.8	881	5333.05	881	7138.06	881	4577.73	881	22492.3	881	14129.6
882	14829.1	882	5100.92	882	10589.3	882	6995.37	882	6686.41	882	4280.83	882	23851.4	882	15114.6
883	11183.3	883	4141.45	883	12488.9	883	9602.26	883	7052.76	883	5199.23	883	24175.1	883	15234.8
884	9443.43	884	2154	884	13047.4	884	9620.32	884	7234.23	884	4781.89	884	26901.3	884	17243.2
885	11940.9	885	3765.84	885	8319.9	885	5002.63	885	7255.27	885	4958.87	885	26391	885	16929.6
886	9496.16	886	3467.74	886	7950.51	886	4118.64	886	7487.41	886	4542.36	886	25598.7	886	16039
887	9513.68	887	4887.26	887	5299.42	887	3138.04	887	7082.78	887	4750.35	887	24629.3	887	15584.2
888	11311.1	888	4937.99	888	4562.6	888	3067.7	888	7315.29	888	4364.66	888	23391.9	888	15300.1
889	9906.7	889	4413.69	889	5497.08	889	3998.54	889	8579.82	889	5264.17	889	21892.5	889	15077.8
890	9817.09	890	3069.12	890	5585.5	890	3319.19	890	8703.57	890	5326.47	890	20063.5	890	14469.7
891	10627.6	891	3038.93	891	4819.6	891	2313.65	891	9822	891	5979.83	891	18540.7	891	13246.5
892	11432	892	3700.56	892	2449.54	892	1501.43	892	10220.8	892	5808.84	892	20513.8	892	14425.1
893	11907.8	893	4246.98	893	2881.94	893	1911.82	893	10454.8	893	6612.38	893	21442	893	14587.8
894	13310.4	894	4936.9	894	7077.91	894	6200.92	894	10859.6	894	5518	894	20126.8	894	14164.5
895	15336.6	895	5390.19	895	11044.2	895	7419.17	895	11651	895	5828.23	895	19077.3	895	14927.8
896	18617	896	6604.41	896	9388.86	896	6265.23	896	10969.7	896	5955.13	896	17926.7	896	14539.1
897	20059	897	7373.27	897	11434.9	897	7544.56	897	10504.1	897	4606.32	897	17288.4	897	14226.8
898	16790.6	898	5665.14	898	13550.3	898	9655.03	898	10479.5	898	5014.55	898	16205.3	898	13560.9
899	14650.1	899	4673.22	899	14355.8	899	10776.5	899	10892	899	4928.42	899	15201.4	899	12056.1
900	14104.8	900	5480.82	900	13510.5	900	9880.68	900	10911.8	900	4442.21	900	15014.2	900	12596.8
901	13482	901	5523.75	901	12483.4	901	8844.01	901	11094.8	901	4373.91	901	14808.3	901	12612.9
902	8193.39	902	3289.41	902	11270.3	902	6286.43	902	11176.2	902	4832.86	902	16587.2	902	14436.3
903	10993.8	903	4378.71	903	10999.7	903	5481.49	903	10896	903	4711.34	903	18492.2	903	15895.3
904	11100.9	904	4464.18	904	11669	904	6583.93	904	10532.3	904	5040.48	904	17941.5	904	15265.8
905	14946.3	905	5989.87	905	9618.69	905	5262.77	905	8112.62	905	5086.87	905	18252.5	905	16154.1
906	14853.6	906	6918.31	906	8241.65	906	5495.92	906	7780.61	906	4573.04	906	19183.6	906	16802.5
907	19168.1	907	9354.44	907	6396.35	907	3199.46	907	7583.77	907	5233.97	907	19601.5	907	17205.4
908	22194	908	10506.5	908	5593.74	908	3275.08	908	8347.01	908	5906.05	908	18316.1	908	16112.8
909	21923.3	909	10159.6	909	5685.73	909	3388.05	909	8749.39	909	5529.63	909	19240.6	909	16120
910	24538.7	910	9876.14	910	7302.45	910	4952.41	910	9997.07	910	5631.76	910	19851.8	910	16233
911	23611.9	911	10447.1	911	10439.8	911	7877.09	911	11358.9	911	6769.04	911	18077.6	911	15957.9
912	24426.3	912	11310.2	912	11326.5	912	8079.93	912	12956.9	912	7802.04	912	19659.6	912	16677.1
913	23583.1	913	11507.1	913	8785.82	913	6106.16	913	12983.8	913	6614.24	913	19113.7	913	16342.7
914	20926.9	914	10768.1	914	9528.03	914	7048.93	914	11309.1	914	6722.08	914	17994.5	914	15608.1
915	23249.7	915	10125.5	915	7505.45	915	4989.26	915	9998.18	915	5304.57	915	19157.8	915	16139.6
916	21267.5	916	9858.03	916	4806.05	916	3018.41	916	10215.8	916	5978.37	916	18523.2	916	15841.2
917	21995.1	917	8679.8	917	4440.82	917	4212.84	917	10803.1	917	7254.04	917	18179.5	917	15814.7
918	21746.2	918	8883.56	918	5836.59	918	5907.52	918	10584.7	918	7504.55	918	18402.6	918	15735.8
919	19968.8	919	8558.82	919	8126.8	919	7527.06	919	10085.8	919	6939.88	919	18472.2	919	16253.4
920	19733.5	920	8808.44	920	9771.8	920	7294.39	920	9510.11	920	7204.37	920	19268	920	16417
921	18988.2	921	9122.55	921	9075.18	921	5488.05	921	9521.59	921	6945	921	17801.4	921	14628.3
922	21305.9	922	10525.2	922	7475.19	922	4700.24	922	9132.28	922	4546.92	922	17520.3	922	14800
923	20584.5	923	9325.03	923	6289.12	923	3655.61	923	8573.18	923	4751.21	923	18453.9	923	15408.4
924	19461.2	924	8440.33	924	5444.85	924	3182.91	924	8887.71	924	4890.29	924	17710.1	924	14933
925	19740.5	925	9740.86	925	4818.5	925	3484.43	925	8881.88	925	4338.72	925	19188.6	925	15782.8
926	19460.5	926	9234.51	926	4320.91	926	2774.86	926	9199.62	926	6083.43	926	21153.3	926	16372.9
927	19301.7	927	9228.55	927	4833.77	927	2994.3	927	8901.78	927	6016.18	927	21443.5	927	16621.2
928	19586.5	928	9095.93	928	4376.23	928	2255.01	928	8789.15	928	6414.33	928	20556.3	928	15229.5
929	18591.6	929	8548.75	929	5250.15	929	4121.74	929	9558.66	929	6977.62	929	22761.2	929	17984.5
930	19609.6	930	9780.61	930	6753.76	930	4398.96	930	11824.9	930	5414.31	930	23354.6	930	17028.5
931	22595.2	931	11166	931	7254.84	931	3304.84	931	14657	931	6608.37	931	21879.9	931	15565.7
932	23493.4	932	11976.5	932	6568.28	932	3654.69	932	14636.3	932	7619.17	932	20773.6	932	15518.2
933	21883.3	933	10958.4	933	6011.75	933	4240.3	933	13264.7	933	9304.98	933	23507.1	933	18791.1
934	19849.2	934	10647.7	934	5893.84	934	5654.54	934	12177.4	934	8864.48	934	20424.6	934	16991.4
935	19630.4	935	10155.1	935	5922.1	935	6474.7	935	10045	935	8059.79	935	17578.6	935	14787.4
936	19182.4	936	9006.55	936	5543.92	936	6276.48	936	10797.5	936	8739.68	936	15147.3	936	12111.4
937	17605.7	937	7218.16	937	5545.64	937	6061.88	937	7621.88	937	7322.99	937	13877.8	937	10005.2
938	19513.3	938	8455.6	938	5479.7	938	5795.67	938	8680.59	938	6986.34	938	13845.7	938	9312.41
939	21164	939	9624.57	939	5914.66	939	6422.88	939	7260.15	939	7320.62	939	14308.5	939	8990.14
940	19240	940	8550.69	940	5960.31	940	6746.09	940	6979.31	940	5940.64	940	15071.2	940	9607.44
941	19481.1	941	8573.23	941	6765.18	941	8283.46	941	6912.22	941	5914	941	15554.3	941	9716.77
942	19512.6	942	8347.9	942	7288.69	942	7316.24	942	5880.6	942	5372.82	942	16747.2	942	11309.4
943	20152.4	943	9014.67	943	8463.74	943	8408.06	943	4736.5	943	4094.95	943	16235.2	943	11432.1
944	18524.8	944	8884.01	944	8918.11	944	9096.48	944	5999.76	944	3988.72	944	16257	944	10946.8
945	18574.1	945	9572.13	945	10111	945	9085.65	945	8546.25	945	5153.09	945	16897	945	11467.4
946	19290.1	946	9369.98	946	9355.08	946	9052.55	946	11730.9	946	8049.29	946	16350.2	946	11081.9
947	16332.9	947	6722.63	947	10910.9	947	9927.54	947	14626.3	947	9449.19	947	14820.3	947	10285.6
948	16630.1	948	7534.4	948	10236.9	948	10482.7	948	17210.1	948	10014.7	948	15222	948	10587
949	15010.9	949	7636.12	949	11932.4	949	11942.8	949	21079.5	949	14118	949	15629.8	949	10104.1
950	16793.4	950	7941.77	950	9210.95	950	12850	950	20669.2	950	15342.7	950	15264.6	950	10273.3
951	17261.2	951	8110.15	951	6341.95	951	8474.55	951	23252.5	951	17352.3	951	13733.5	951	9326.42
952	18579.9	952	8165.59	952	6104.74	952	7998.97	952	22577.2	952	19883.9	952	13537.1	952	8054.73
953	15526.3	953	6463.85	953	6394.52	953	7098.85	953	20998.2	953	17964.4	953	11617.7	953	6766.48
954	18950.2	954	9148.57	954	7591	954	8383.88	954	17944.5	954	16353.1	954	12966.2	954	7626.73
955	15432.4	955	7585.86	955	7115.47	955	4003.08	955	18054.6	955	18530.5	955	10773	955	6064.89
956	14913.1	956	7208.01	956	7042.06	956	4236.15	956	16719.6	956	17491.6	956	9595.05	956	5639.16
957	15690.8	957	8041.56	957	5592.76	957	4577.5	957	18350.5	957	18007.8	957	9458.19	957	6907.64
958	16983.8	958	8768.62	958	4544.4	958	3817.3	958	19208.1	958	17017	958	10233.1	958	7515.48
959	17788.8	959	9989.18	959	5419.47	959	3238.94	959	19660.1	959	13871.1	959	9719.59	959	6759.1
960	19490.5	960	10866.2	960	6829.62	960	3600.9	960	22498.5	960	15410.5	960	8406.83	960	6188.6
961	18072.7	961	8425.16	961	7627.99	961	5000.05	961	19511.3	961	13392.4	961	7342.7	961	4701.77
962	19758.2	962	9489	962	9086.93	962	7023.64	962	22838.3	962	15308.4	962	7684.26	962	5830.93
963	17910	963	9145.71	963	9479.85	963	6737.4	963	20186.1	963	14916.3	963	8916.38	963	7637.8
964	16154.2	964	8059.02	964	9195.21	964	6419.74	964	18139.5	964	14567.7	964	8022.5	964	5291.53
965	14534.8	965	7773.82	965	7613.58	965	5177.41	965	17259.7	965	13810.5	965	9901.84	965	7758.85
966	12689	966	7293.77	966	5772.99	966	4870.83	966	20750.4	966	17036.8	966	10576.2	966	8561.16
967	10414.9	967	5523.64	967	5307.1	967	3981.9	967	20064.6	967	16146.3	967	11738.3	967	8550.01
968	8578.07	968	4450.4	968	6486	968	4112.65	968	19430.1	968	16755.1	968	12658.1	968	9500.19
969	13039	969	6760.05	969	6915.81	969	5144.81	969	19903.5	969	16369.5	969	13614.7	969	8922.15
970	12926.2	970	7332.36	970	7671.65	970	5688.17	970	18753.6	970	13984.4	970	15448.5	970	8843.51
971	13820.5	971	7671.56	971	6754.52	971	4236.27	971	17487.2	971	11887.1	971	15307.9	971	8533.64
972	15477	972	7541.72	972	8590.98	972	7049.63	972	16476.3	972	11430.8	972	13621.1	972	6130.62
973	14092.6	973	8699.82	973	7670.87	973	4437.71	973	15998.6	973	10125.2	973	12680.5	973	5578.09
974	16753.8	974	9808.26	974	6423.25	974	3786.88	974	17957.1	974	13044.3	974	11883.1	974	5087.55
975	20637.4	975	11266.9	975	5662.71	975	2881.07	975	17832	975	13325.4	975	11059.9	975	4501.94
976	22430.9	976	12453.4	976	5479.05	976	2681.16	976	15022.5	976	12092.2	976	11339.6	976	5556.43
977	19785.9	977	11036.2	977	5173.11	977	3314.79	977	14016.9	977	9712.43	977	12439.7	977	6385.95
978	15817.8	978	8059.36	978	4308.35	978	2501.93	978	15769.2	978	12766	978	13535.1	978	6314.79
979	13058.8	979	6660.3	979	4452.8	979	1303.39	979	13686	979	10198.7	979	15932.9	979	8165.1
980	12224.9	980	5716.03	980	3619.92	980	1833.61	980	15287.5	980	12892.8	980	17482	980	9263.27
981	13064.5	981	6567.94	981	4823.12	981	3089.74	981	15434.1	981	12180.2	981	19265.8	981	10237.2
982	13338.6	982	6387.11	982	4265.37	982	2690	982	12411.8	982	7476.46	982	20321.7	982	11020.3
983	13374.5	983	6397.81	983	5711.53	983	2962.32	983	13830	983	10317.1	983	19955.6	983	10220.3
984	14235.9	984	7186.53	984	8131.07	984	4855.04	984	14786.8	984	11810.7	984	19408.3	984	10618.8
985	14646.6	985	6877.34	985	6734.93	985	4887.2	985	14107.4	985	9931.92	985	17895.9	985	10123.6
986	14939.5	986	7972.79	986	6195.57	986	2934.47	986	15313.3	986	11862.7	986	17636.2	986	11763.3
987	11748.6	987	7425.47	987	7492.58	987	5957.4	987	14481.4	987	9657.23	987	17758.6	987	11067.9
988	8918.97	988	5198.2	988	8179.3	988	5163.92	988	14209.2	988	10892.9	988	17997.6	988	10890.6
989	9238.42	989	4067.7	989	7682.88	989	4847.07	989	13133.4	989	9602.23	989	19159.6	989	12127.9
990	11259.1	990	5241.91	990	5398.83	990	2352.26	990	13162.2	990	9986.81	990	16666.6	990	11078.8
991	12865.2	991	6744.4	991	8950.86	991	5001.48	991	12209.1	991	9272.67	991	15978.2	991	10000.9
992	12879.4	992	7227.15	992	7742.59	992	4562.55	992	12671	992	9048.65	992	16324.3	992	9776.18
993	12770.8	993	5520.32	993	10586.6	993	8278.84	993	12879.2	993	9552.68	993	16160.9	993	9484.62
994	11205.2	994	4606.48	994	13048.1	994	11144.1	994	10900.3	994	8629.26	994	16655	994	10053.6
995	12726.4	995	5238.53	995	13910.2	995	14003.7	995	12710.8	995	10726.6	995	17309.6	995	10454.2
996	12406	996	5842.29	996	12158.1	996	9253.43	996	14150.7	996	11217.5	996	16573.6	996	10232.6
997	12074.2	997	5557.03	997	12115.5	997	9051.98	997	12807	997	10716.9	997	16300.3	997	8702.95
998	10478.5	998	4729.35	998	11763.8	998	9115.48	998	10236.5	998	7659.95	998	17065.8	998	10129.9
999	9579.55	999	4056.39	999	12463.2	999	11335.8	999	9842.95	999	7207.21	999	15779.1	999	8586.96
1000	9702.9	1000	4188.96	1000	14474.7	1000	14790.6	1000	8812.78	1000	6216.53	1000	15555	1000	8891.23
1001	9617.57	1001	4255.83	1001	14600.1	1001	13614.2	1001	10679.6	1001	8580.86	1001	15290.8	1001	9414.64
1002	9675.72	1002	4555.73	1002	13660.7	1002	10133	1002	9829.58	1002	9275.44	1002	14895.8	1002	9151.29
1003	10880.9	1003	4284.4	1003	10767.2	1003	6873.17	1003	10728	1003	9095.89	1003	16147.8	1003	9950.98
1004	10968.1	1004	4468.85	1004	7988.23	1004	4913.6	1004	9823.69	1004	8782.89	1004	15982.7	1004	10306.3
1005	10230.3	1005	3259.43	1005	8332.02	1005	5042.64	1005	9042.07	1005	7431.43	1005	14929	1005	10410.5
1006	9616.28	1006	2729.79	1006	8595.86	1006	6432.5	1006	9060.86	1006	6712.08	1006	16806.7	1006	10672.7
1007	9765.77	1007	3229.52	1007	9589.3	1007	8694.09	1007	9653.5	1007	8212.14	1007	18658.7	1007	11619.6
1008	10768.7	1008	3873.24	1008	9455.19	1008	7908.37	1008	9994.96	1008	8116.4	1008	19693.2	1008	11304.9
1009	11579.9	1009	3856.74	1009	9924.22	1009	8482.08	1009	10233	1009	7834.1	1009	20380.5	1009	11318.8
1010	12928.2	1010	3993.76	1010	10184.1	1010	8047.55	1010	10178.9	1010	7754.81	1010	20430.4	1010	11380.5
1011	15141.3	1011	6680.45	1011	10787.1	1011	9123.95	1011	9350.61	1011	8469.08	1011	20189.8	1011	10855
1012	14848.8	1012	6208.67	1012	9135.79	1012	7994.85	1012	10009.4	1012	8244.49	1012	20864.2	1012	11234.8
1013	14706.7	1013	7205.29	1013	10992.7	1013	9908.16	1013	10445.3	1013	8413.83	1013	19161.5	1013	10103.8
1014	14255.7	1014	6372.7	1014	9133.95	1014	8615.84	1014	10375.5	1014	8304.48	1014	16137.7	1014	8107.61
1015	15653.1	1015	8150.3	1015	8856.86	1015	5900.01	1015	12650.7	1015	10212.9	1015	13590.6	1015	6616.92
1016	13962.3	1016	7708.48	1016	8481.11	1016	5163.42	1016	13434.9	1016	10085.9	1016	12518.9	1016	6350.47
1017	13530.7	1017	6943.91	1017	9962.27	1017	5887.86	1017	14003	1017	10696.5	1017	12348.3	1017	5605.19
1018	12132.5	1018	5257.51	1018	9693.34	1018	6020.27	1018	12754.9	1018	8404.01	1018	12092.2	1018	5186.64
1019	13510.4	1019	6003.49	1019	7201.86	1019	4862.43	1019	13009.4	1019	9385.23	1019	12627.9	1019	4861.32
1020	15613.4	1020	7380.36	1020	4822.14	1020	3029.76	1020	12531.8	1020	9108.55	1020	12659.7	1020	4961.09
1021	15377.5	1021	6941.39	1021	4247.03	1021	2076.53	1021	11684.1	1021	9186.93	1021	13032.8	1021	5084.39
1022	16790.9	1022	7403.56	1022	2391.55	1022	961.442	1022	11604.1	1022	6886.94	1022	12674.8	1022	5171.23
1023	14008.9	1023	6750.2	1023	3566.87	1023	1767.08	1023	11480	1023	7188.51	1023	12330.6	1023	6327.38
1024	12255.8	1024	5452.45	1024	5940.1	1024	3645.42	1024	11605.5	1024	7473.89	1024	11470.3	1024	6153.35
1025	11805.3	1025	5443.75	1025	6285.23	1025	3668.31	1025	10957.7	1025	6996.23	1025	10234.3	1025	6104.17
1026	10864.1	1026	4471.29	1026	9339.52	1026	5913.54	1026	10563.2	1026	5446.36	1026	10981	1026	6626.37
1027	11539.2	1027	4364.93	1027	10553	1027	6608.44	1027	10611.1	1027	5666.16	1027	11746.8	1027	7068.1
1028	15090.7	1028	6723.13	1028	13494.2	1028	9282.07	1028	11140.2	1028	6603.08	1028	10286.6	1028	5985.87
1029	11414.7	1029	4689.24	1029	16622.1	1029	10828.5	1029	12656.1	1029	6994.26	1029	10533.1	1029	5564.5
1030	15831.8	1030	7059.73	1030	16868.6	1030	8892	1030	12445.2	1030	8531.19	1030	10349.8	1030	5665.94
1031	17498.5	1031	7310.66	1031	16617.6	1031	10327	1031	12748	1031	9578.17	1031	10312.1	1031	5641.21
1032	16842.1	1032	7228.95	1032	15530.4	1032	9039.04	1032	13914.4	1032	9763	1032	9185.64	1032	5102.6
1033	20201	1033	7273.08	1033	13814.7	1033	7433.68	1033	13589.5	1033	9349.88	1033	9766.56	1033	5281.93
1034	20851.8	1034	7421.13	1034	13178.4	1034	6032.08	1034	9864.48	1034	7875.65	1034	10880.9	1034	6164.09
1035	21009.2	1035	7725.15	1035	12680.9	1035	6964.31	1035	9740.5	1035	7325.69	1035	10536.9	1035	6443.72
1036	22872.4	1036	8512.97	1036	10266.5	1036	6884.13	1036	10674.2	1036	7749.92	1036	10292.5	1036	6659.45
1037	22724	1037	8994.22	1037	9727.5	1037	6443.18	1037	9868.82	1037	6467.6	1037	10675	1037	6827.89
1038	21920	1038	9453.16	1038	9330.23	1038	6603.16	1038	11458.7	1038	7173.5	1038	10416.9	1038	6936.53
1039	21104.5	1039	8385.98	1039	9992.76	1039	8097.08	1039	10771.7	1039	6367.02	1039	10717.1	1039	7005.6
1040	19663.5	1040	8179.77	1040	10428.8	1040	8115.47	1040	10223.1	1040	7376.54	1040	11663.2	1040	7301.82
1041	21188	1041	7430.79	1041	10425.2	1041	6757.78	1041	12303.5	1041	9011.16	1041	11757.3	1041	7760.72
1042	20648.3	1042	7126.03	1042	10126.8	1042	6906.61	1042	11641.4	1042	7775.16	1042	10531.6	1042	6949.23
1043	20359.3	1043	7296.6	1043	11658.2	1043	6980.82	1043	11553.3	1043	7325.45	1043	12482.8	1043	8498.43
1044	22073	1044	7847.79	1044	11826.3	1044	8201.14	1044	11935.2	1044	7546.54	1044	10546.5	1044	7576.35
1045	20471.4	1045	8455.77	1045	12274.9	1045	8780.3	1045	11902.6	1045	7626.98	1045	9144.03	1045	6715.61
1046	19745.8	1046	8556.93	1046	10298.4	1046	8368.02	1046	11571.5	1046	8613	1046	13480.7	1046	9348.98
1047	20159.2	1047	9883.61	1047	9642.81	1047	7284.46	1047	11430.1	1047	9723.35	1047	13847.7	1047	9260.54
1048	19276.5	1048	9045.3	1048	9337.48	1048	5745.42	1048	11770.9	1048	11721.5	1048	13215.5	1048	8505.5
1049	17457.7	1049	8550.73	1049	9461.12	1049	6109.14	1049	11691.5	1049	11912.6	1049	15283.9	1049	8842.71
1050	15577.8	1050	7658.9	1050	9632.99	1050	5462.75	1050	10325.5	1050	12042.7	1050	14195.9	1050	8523.88
1051	13349.7	1051	6530.15	1051	8871.26	1051	3331.33	1051	11374	1051	12684.5	1051	14960.7	1051	8781.02
1052	13513.9	1052	7151.06	1052	7765.97	1052	3616.16	1052	9768.66	1052	11199.2	1052	16118.5	1052	10176.6
1053	13254.9	1053	7636.76	1053	9330.67	1053	5430.72	1053	9059.76	1053	10328	1053	17163.3	1053	11372.3
1054	11151.3	1054	5393.92	1054	8134.52	1054	6339.96	1054	7851.09	1054	9481.74	1054	15752.2	1054	10052.9
1055	11294	1055	5148.18	1055	8231.91	1055	9367.21	1055	7007.69	1055	8266.31	1055	13950.3	1055	10052.8
1056	9292.58	1056	4466.76	1056	9322.6	1056	9951.35	1056	7679.14	1056	9346.63	1056	12831.3	1056	10084.8
1057	8715.99	1057	5064.97	1057	9743.83	1057	9847.84	1057	8359.87	1057	10859.4	1057	11587.8	1057	9438.25
1058	8512.94	1058	4846.48	1058	9838.41	1058	8773.47	1058	9289.25	1058	8527.14	1058	13311.8	1058	11427.5
1059	9015.57	1059	5054.7	1059	9781.28	1059	6767.16	1059	10104.7	1059	8809.4	1059	13431.6	1059	11995.5
1060	9572.66	1060	4015.66	1060	9303.96	1060	6092.66	1060	12258.6	1060	8919.37	1060	14858.1	1060	11668.7
1061	9776.04	1061	4020.36	1061	9720.76	1061	5428.21	1061	13656.4	1061	8705	1061	15924.9	1061	11641.5
1062	11300.7	1062	4192.06	1062	10983.1	1062	7804.21	1062	14912.2	1062	10339.1	1062	15963.7	1062	9645.88
1063	10690.3	1063	4008.91	1063	11383.3	1063	8515.05	1063	14566.2	1063	10190.1	1063	16279.9	1063	9628.8
1064	11023.4	1064	4718.36	1064	10202.4	1064	6616.47	1064	14456.7	1064	9130.77	1064	15980.8	1064	8928.44
1065	12729.1	1065	6942.78	1065	11635.5	1065	7722.43	1065	13024.5	1065	9958.39	1065	17362.7	1065	9161.88
1066	16504.9	1066	8846.66	1066	10982.8	1066	8569.4	1066	12646.4	1066	10590.1	1066	17641.3	1066	9435.3
1067	18291.1	1067	8455.33	1067	9384.67	1067	8910.47	1067	12889.3	1067	10643	1067	17672.4	1067	10602.8
1068	17513.2	1068	7912.02	1068	9194.91	1068	8637.24	1068	13897.1	1068	11188.9	1068	18190.5	1068	11296.2
1069	16996.9	1069	8423.57	1069	6510.48	1069	6025.78	1069	13920.9	1069	10164.2	1069	18131.3	1069	11376.6
1070	13468.1	1070	8205.26	1070	6977.64	1070	5543.09	1070	14309.9	1070	11829.6	1070	17471	1070	12888.4
1071	14874	1071	7714.2	1071	7155.31	1071	5328.9	1071	13443.3	1071	12579.1	1071	15076.7	1071	11348.5
1072	12959.7	1072	6208.12	1072	6924.77	1072	6079.76	1072	13203.1	1072	13744.2	1072	13609	1072	10915.5
1073	11192.3	1073	5964.29	1073	6192.69	1073	5508.08	1073	13044.9	1073	12956.7	1073	11123.9	1073	9104.26
1074	11474	1074	5552.52	1074	7140.69	1074	5704.18	1074	12306.4	1074	10491.5	1074	12602.1	1074	9716.95
1075	12743.5	1075	5176.81	1075	7958.04	1075	6959.87	1075	11709.6	1075	8196.2	1075	15620.6	1075	10728
1076	16587.2	1076	6706.94	1076	6929.51	1076	7002.5	1076	11693.1	1076	8016.31	1076	15332.9	1076	9819.04
1077	18992.6	1077	7254.51	1077	6893.3	1077	5640.25	1077	10805.5	1077	7314.09	1077	16401.2	1077	9884.88
1078	17379.2	1078	7070.23	1078	7013.03	1078	6654.41	1078	12838.1	1078	8349.41	1078	16155.4	1078	9891.43
1079	19726.7	1079	7770.86	1079	8734.7	1079	6657.34	1079	11664.3	1079	8168.57	1079	14892.7	1079	9805.09
1080	20236.6	1080	6892.61	1080	8099.52	1080	7180.07	1080	10300.2	1080	8614.86	1080	14539.4	1080	8366.02
1081	16923.8	1081	5654.19	1081	9500.15	1081	8018.41	1081	10660.5	1081	10767.3	1081	14475.4	1081	8137.63
1082	16989.1	1082	5066.19	1082	7938.97	1082	7332.98	1082	9126.54	1082	7808.24	1082	14650.1	1082	7295.13
1083	18124.2	1083	5357.61	1083	9264.92	1083	8582.51	1083	9067.56	1083	7696.28	1083	15171	1083	6716.02
1084	18569.2	1084	6232.48	1084	9177.79	1084	7607.03	1084	9780.71	1084	7659.03	1084	15446.9	1084	7503.72
1085	16528.6	1085	5194.78	1085	7550.51	1085	5398.07	1085	10317.4	1085	8248.54	1085	14072.4	1085	6717.48
1086	17692.5	1086	5581.38	1086	10489.9	1086	8307.04	1086	11007.2	1086	10426.2	1086	14199.7	1086	7074.78
1087	19159.8	1087	6472.27	1087	11191.1	1087	8101.36	1087	13740.5	1087	12520.7	1087	13778.5	1087	7890.16
1088	17960.7	1088	6435.11	1088	10073.3	1088	5673.8	1088	12361.5	1088	12612.9	1088	13100.2	1088	8284.55
1089	17727.6	1089	7075.94	1089	9601.22	1089	6608.82	1089	13707.2	1089	14216.7	1089	12260.3	1089	8242.23
1090	19405.9	1090	7611.28	1090	10059.6	1090	5618.03	1090	12445.7	1090	13384.5	1090	12409.6	1090	9081.11
1091	18471.6	1091	6865.86	1091	11275.8	1091	8849.68	1091	11937.9	1091	12646.7	1091	14445.9	1091	8471.8
1092	18952.6	1092	6483.27	1092	9987.99	1092	6979.35	1092	11633.4	1092	11605.8	1092	15606.3	1092	9073.94
1093	19249.5	1093	5773.41	1093	4670.73	1093	1792.65	1093	10929.2	1093	10792	1093	17326	1093	9160.02
1094	18061.8	1094	6228.13	1094	7113.44	1094	3391.45	1094	10149.3	1094	9652.98	1094	14287.6	1094	8255.92
1095	17717.7	1095	6106.87	1095	8369.89	1095	2342.75	1095	9650.76	1095	10117.4	1095	15380.8	1095	8620.29
1096	19718.5	1096	6343.63	1096	9763.81	1096	2921.03	1096	9184.48	1096	8305.02	1096	12766.3	1096	7538.22
1097	17381	1097	5921.58	1097	12823.1	1097	5020.05	1097	7971.5	1097	6469.83	1097	14039.6	1097	7661.5
1098	18549.5	1098	6274.92	1098	17078.8	1098	9338.67	1098	7699.66	1098	7085.94	1098	10872.5	1098	6316.12
1099	14688	1099	6250.77	1099	17770.5	1099	9837.08	1099	8159.56	1099	8010.19	1099	9282.86	1099	5791.07
1100	15828	1100	6199.51	1100	16171.1	1100	9823.8	1100	8636.6	1100	8950.59	1100	8213.25	1100	5860.65
1101	14446.1	1101	6463.03	1101	14120.7	1101	9023.44	1101	9055.46	1101	8552.41	1101	7386.4	1101	5710.71
1102	15686.4	1102	7317.23	1102	12261.7	1102	7160.6	1102	10011.4	1102	8375.46	1102	7679.37	1102	5909.02
1103	17444.6	1103	9767.19	1103	10583	1103	6674.32	1103	10106.1	1103	8204.82	1103	8719.4	1103	6170.89
1104	17352.5	1104	9473.06	1104	12873.6	1104	7090.21	1104	11628.4	1104	10304.7	1104	9196.29	1104	5915.23
1105	17338.4	1105	8829.32	1105	14220.2	1105	8836.31	1105	11089.2	1105	9311.86	1105	9401.72	1105	5640.12
1106	16562.1	1106	7801.8	1106	15472.9	1106	9686.92	1106	9728.58	1106	8946.21	1106	9219.06	1106	5487.15
1107	14709.6	1107	6162.22	1107	17338.2	1107	9886.15	1107	8502.37	1107	7141.91	1107	9517.91	1107	6816.87
1108	12611.5	1108	4701.84	1108	17693.3	1108	10131.9	1108	8297.27	1108	6616.84	1108	9919.17	1108	7238.2
1109	16366.2	1109	6646.94	1109	16215.6	1109	9351.2	1109	8592.4	1109	5688.81	1109	11971.2	1109	9564.32
1110	16360.1	1110	6376.24	1110	15463.9	1110	9531.82	1110	8817.85	1110	4762.51	1110	14225.6	1110	9422.47
1111	22885.3	1111	7819.26	1111	14824.4	1111	9127.04	1111	7863.51	1111	4350.5	1111	14844.6	1111	9085.98
1112	21969.1	1112	7157.9	1112	15342.2	1112	9816.3	1112	7409.98	1112	4502.56	1112	15419.8	1112	9796.88
1113	19509.3	1113	6580.43	1113	14304.5	1113	10622.8	1113	6634.63	1113	6650.99	1113	16011.4	1113	9723.62
1114	15538.7	1114	5874.77	1114	14053.9	1114	11014.7	1114	7468.61	1114	7912.65	1114	14424.2	1114	9378.73
1115	16115.7	1115	5465.29	1115	13991.9	1115	13932.6	1115	7582.63	1115	7327.2	1115	11650.5	1115	7840.66
1116	14685.6	1116	5620.34	1116	14205.1	1116	12617	1116	7558.93	1116	6364.74	1116	13123.6	1116	8389.52
1117	14482.4	1117	5691.64	1117	15538.5	1117	12541.8	1117	7428.38	1117	6693.43	1117	12202.2	1117	6725.9
1118	14363.1	1118	5561.18	1118	17523.1	1118	15615.5	1118	6946.21	1118	4519.98	1118	10922.7	1118	6039.16
1119	15181.8	1119	6110.45	1119	18679.3	1119	14920.8	1119	7740.55	1119	5749.95	1119	9870.16	1119	5840.4
1120	16611.3	1120	6612.61	1120	17743.2	1120	14949.2	1120	8558.99	1120	6161.07	1120	10042.7	1120	5933.65
1121	16471.2	1121	7436.46	1121	20449.1	1121	16156.5	1121	9521.1	1121	7606.01	1121	12081.9	1121	8110.9
1122	15160	1122	8442.41	1122	15122.3	1122	11675.6	1122	10987.6	1122	8353.6	1122	15314.5	1122	9384.39
1123	16706.7	1123	9327.69	1123	17216.5	1123	14298.3	1123	10566.3	1123	8489.04	1123	16597	1123	9993.84
1124	17040	1124	9160.47	1124	13667.2	1124	9876.91	1124	11144.4	1124	9015.65	1124	16858.9	1124	9811.75
1125	15711.2	1125	8125.44	1125	10738	1125	6672.99	1125	10571.8	1125	8309.41	1125	14782.1	1125	9552.51
1126	14104.6	1126	8166.2	1126	11346	1126	5822.7	1126	9930.86	1126	9398.57	1126	13834.1	1126	9699.21
1127	14971.8	1127	7354.78	1127	11057	1127	6179.53	1127	9512.16	1127	8702.3	1127	13411.5	1127	9754.38
1128	15342.2	1128	7166.73	1128	11893.3	1128	6322.91	1128	8947.54	1128	8304.16	1128	12575.8	1128	9020.57
1129	15773	1129	6896.09	1129	11072.7	1129	5906.01	1129	8799.59	1129	9201.53	1129	11355.1	1129	7550.27
1130	16488	1130	7282.84	1130	10068	1130	6727.86	1130	9038.88	1130	11626.9	1130	11559.6	1130	7439.61
1131	18361	1131	8460.88	1131	9718.88	1131	6878.85	1131	9369.85	1131	13412.6	1131	12763.2	1131	8024.53
1132	18401.2	1132	8417.14	1132	10398	1132	6895.31	1132	9317.13	1132	11363.2	1132	14118.1	1132	8772.77
1133	16902.8	1133	7327.29	1133	10320	1133	7774.26	1133	9802.73	1133	9996.42	1133	14795.4	1133	9711.31
1134	14516.8	1134	6458.12	1134	10897.6	1134	8532.35	1134	10625.4	1134	9879.07	1134	15281.2	1134	9913.16
1135	13179.4	1135	5822.19	1135	10107	1135	6686.17	1135	9832.08	1135	7564.95	1135	16857.9	1135	10588.1
1136	11318.3	1136	4914.22	1136	9831.73	1136	7245.49	1136	8663.22	1136	7555.4	1136	17586.7	1136	11861.3
1137	12979.1	1137	5396.03	1137	8963.6	1137	6507.31	1137	9072.35	1137	8600.94	1137	17789.8	1137	12749
1138	8090.84	1138	3549.45	1138	9280.61	1138	6843.53	1138	10402.2	1138	11525.5	1138	15372.1	1138	11662.6
1139	8499.78	1139	4030.94	1139	10226.2	1139	8396.39	1139	10263.4	1139	11453.7	1139	14124.8	1139	10072
1140	8844.36	1140	4423.45	1140	11925.6	1140	10213.4	1140	11602.5	1140	13132.5	1140	14230.7	1140	9686.13
1141	9329.02	1141	5379.2	1141	12759.5	1141	11786.9	1141	11443	1141	10184	1141	16275.2	1141	10551.6
1142	9514.75	1142	4820.81	1142	13306.2	1142	11510.5	1142	12501.4	1142	11292.1	1142	16747.4	1142	10980.2
1143	7926.51	1143	4039.3	1143	14341.2	1143	9905.96	1143	14076.3	1143	12197.3	1143	15761	1143	9014.67
1144	6410.95	1144	4251.02	1144	14856.6	1144	9987.48	1144	14304.4	1144	12401.6	1144	14611.6	1144	7825
1145	10319.3	1145	7841.4	1145	14289.7	1145	10180.3	1145	15610.4	1145	13001.4	1145	13947.3	1145	7947.87
1146	14778.2	1146	8914.45	1146	13741.6	1146	11537.8	1146	15739.7	1146	11237	1146	16949.1	1146	9532.51
1147	14764.6	1147	9423.6	1147	13159.6	1147	10007	1147	15847.2	1147	13298.1	1147	15677.4	1147	9106.8
1148	15474.2	1148	9683.09	1148	11455.3	1148	7399.26	1148	14376.9	1148	11184.3	1148	15321.1	1148	8954.01
1149	17358.2	1149	11131.3	1149	9798.41	1149	7114	1149	12639.7	1149	9944.37	1149	15943.4	1149	8682.58
1150	18119.7	1150	11701.2	1150	9599.7	1150	7014.48	1150	10746.6	1150	8050.06	1150	15392.1	1150	7945.71
1151	17549.4	1151	10157.3	1151	8248.56	1151	6314.93	1151	9719.17	1151	8222.68	1151	15290.5	1151	8036.59
1152	17242.7	1152	10214.2	1152	7184.64	1152	7291.7	1152	7642.05	1152	7901.02	1152	14868.1	1152	7741.86
1153	15694.9	1153	9818.71	1153	8378.28	1153	7058.59	1153	6668.76	1153	6719.82	1153	14205	1153	8544.73
1154	15489.5	1154	9717.4	1154	8071.64	1154	6925.41	1154	6814.42	1154	5090.4	1154	14812.6	1154	9285.29
1155	12672.5	1155	7612.43	1155	9195.3	1155	6277.67	1155	5807.55	1155	5100.91	1155	15846.6	1155	9773.21
1156	12891.6	1156	7508.59	1156	9643.78	1156	6727.95	1156	6691.52	1156	6305.41	1156	14632.3	1156	9481.92
1157	12862.6	1157	7037.04	1157	9656.78	1157	7589.53	1157	7529.28	1157	7361.79	1157	14661.6	1157	10024.6
1158	14434.1	1158	7383.08	1158	9740.62	1158	7168.51	1158	7464.76	1158	6176.31	1158	13899.7	1158	9425.22
1159	15895.8	1159	8226.43	1159	9941.83	1159	6387.1	1159	8079.51	1159	4182.61	1159	13704.7	1159	9610
1160	14967.2	1160	7699.99	1160	9907.45	1160	5468.53	1160	6536.66	1160	2704.82	1160	14117.4	1160	8695.2
1161	11874.6	1161	5549.03	1161	9079.36	1161	5354.39	1161	6026.14	1161	3359.16	1161	15679.1	1161	9311.98
1162	12357.8	1162	6184.32	1162	7923.01	1162	4774.45	1162	6424.69	1162	3215.02	1162	16170.6	1162	9736.37
1163	16007.6	1163	8516.45	1163	6701.78	1163	4326.2	1163	6932.79	1163	2762.87	1163	17441	1163	11844
1164	13803.5	1164	6816.52	1164	6479.31	1164	3596.71	1164	6604.98	1164	2206.89	1164	18376.7	1164	11588.2
1165	16251	1165	8524.57	1165	6569.56	1165	3524.88	1165	6255.34	1165	2089.47	1165	17919	1165	10814.6
1166	13904.2	1166	6331.81	1166	6116.52	1166	3536.57	1166	6750.93	1166	2890.75	1166	20094.9	1166	12708.4
1167	15671.8	1167	7055.1	1167	5587.15	1167	3810.04	1167	5568.11	1167	4098.15	1167	17187	1167	10866.1
1168	16732	1168	8118.41	1168	5064.08	1168	3482.85	1168	5522.16	1168	4687.69	1168	16056	1168	9944.13
1169	17305.7	1169	8771.18	1169	4658.38	1169	3588.28	1169	6299.67	1169	5361.69	1169	15797.8	1169	10488.5
1170	15857	1170	7646.15	1170	4604.53	1170	3510.36	1170	7191.26	1170	6981.19	1170	16363.6	1170	9541.51
1171	16452.1	1171	7460.32	1171	3732.5	1171	3274.3	1171	6996.6	1171	7743.82	1171	16084.9	1171	10063
1172	18463.3	1172	10197.4	1172	4159.67	1172	4073.47	1172	7369.27	1172	8044.59	1172	16048.5	1172	9546.03
1173	15126.5	1173	8786.37	1173	6215.18	1173	5373.45	1173	7926.27	1173	7887.19	1173	15673.2	1173	10003.4
1174	14464.4	1174	7565.53	1174	6464.05	1174	5215.55	1174	7677.49	1174	6861.72	1174	16187.1	1174	10282.1
1175	2954.81	1175	2903.53	1175	7823.5	1175	5507.42	1175	8606.19	1175	7526.77	1175	17051.4	1175	10135.8
1176	6269.67	1176	3964.02	1176	8223.16	1176	5407.48	1176	8911.35	1176	8233.25	1176	17711.9	1176	10286.1
1177	6419.1	1177	3492.84	1177	9394.46	1177	6833.59	1177	8797.42	1177	7293.26	1177	17955.6	1177	9675.77
1178	7447.64	1178	3732.16	1178	10343.4	1178	7897.46	1178	9454.63	1178	7138.45	1178	18340.7	1178	10482
1179	10479.7	1179	4711.14	1179	12717	1179	9026.06	1179	11664.3	1179	9820.2	1179	18943.5	1179	11425
1180	11684	1180	5932.78	1180	14838	1180	11576.1	1180	13604.2	1180	10605.6	1180	19755.5	1180	12005
1181	16257	1181	7141.76	1181	15338.2	1181	11700	1181	13167.1	1181	9786.78	1181	20205.4	1181	13222.3
1182	16292.3	1182	8017.36	1182	16625.9	1182	9879.92	1182	13069.9	1182	9277.12	1182	20128.7	1182	13206.8
1183	16706.5	1183	8157.77	1183	16113.8	1183	9236.69	1183	10783	1183	6855.85	1183	20091.4	1183	13491.2
1184	17271.9	1184	7270.14	1184	14598.6	1184	9787.75	1184	12272	1184	8687.47	1184	24152.3	1184	15318.4
1185	18371.2	1185	8060.99	1185	12556.1	1185	9293.83	1185	12677.3	1185	9065.7	1185	22941.2	1185	14963.9
1186	22821.1	1186	10260.8	1186	11791.7	1186	10442.3	1186	12396.5	1186	8859.48	1186	22638.8	1186	15050.9
1187	22306	1187	10484.3	1187	12826.6	1187	12383.5	1187	13008.9	1187	9320.06	1187	21841.6	1187	15096.2
1188	18576	1188	9203.01	1188	12147.5	1188	12910.4	1188	13460.3	1188	9308.81	1188	21754.2	1188	15180.2
1189	16443.4	1189	9051.92	1189	11566	1189	12148.1	1189	13705.5	1189	10318.7	1189	21463.6	1189	14549.9
1190	15502.8	1190	9185.79	1190	10888.1	1190	8569.92	1190	13979.9	1190	10589.1	1190	21072.8	1190	15285.2
1191	16675.6	1191	8395.83	1191	10504.8	1191	7728.63	1191	14576.4	1191	11980.5	1191	18994.1	1191	15086.7
1192	11619	1192	4383.14	1192	12260.2	1192	10874.6	1192	16959.2	1192	12142.7	1192	17810.9	1192	13098.8
1193	10721.5	1193	6251.41	1193	10650	1193	8185.82	1193	15832.6	1193	10640.1	1193	17099.4	1193	11752.2
1194	13616.7	1194	8376.85	1194	7821.81	1194	5118.92	1194	16862.3	1194	11878.6	1194	18005.7	1194	12462.5
1195	12725.1	1195	8630.67	1195	6906.79	1195	5072.73	1195	13869.6	1195	8269.08	1195	20255.3	1195	12853.7
1196	15283.8	1196	9890.66	1196	6566.91	1196	5124.11	1196	12738.8	1196	7163.33	1196	19030.8	1196	11814.3
1197	15278.4	1197	9644.75	1197	5959.69	1197	4948.66	1197	10348.8	1197	5384.79	1197	18756.6	1197	10919.5
1198	14889.8	1198	9139.36	1198	6310.28	1198	4623.99	1198	10165.7	1198	4632.84	1198	16082	1198	9372.02
1199	12643.2	1199	6864.58	1199	8415.96	1199	5794.49	1199	9563.54	1199	5578.2	1199	13753.8	1199	8873.34
1200	13311.1	1200	7319.21	1200	8025.91	1200	4236.01	1200	8038.23	1200	4161.26	1200	11128.2	1200	8260.24
1201	12559.7	1201	7201.19	1201	11476.6	1201	7106.61	1201	7836.21	1201	3408.21	1201	11074.4	1201	9253.42
1202	10773.8	1202	6317.82	1202	12835.2	1202	8087.27	1202	8178.99	1202	3920.36	1202	11738.1	1202	9388.2
1203	9406.96	1203	6445.46	1203	10596.7	1203	6611.14	1203	7829.34	1203	3889.57	1203	13507.3	1203	10191.9
1204	7760.12	1204	4792.93	1204	9101.19	1204	5650.9	1204	7975.86	1204	3595.78	1204	13659.8	1204	10861.4
1205	6183.19	1205	3644.89	1205	9030.96	1205	6339.57	1205	7744.51	1205	3817.17	1205	14734	1205	9530.8
1206	6269.09	1206	3147.63	1206	8845.33	1206	5029.82	1206	7321.71	1206	3509.94	1206	14353.5	1206	9745.82
1207	7266.62	1207	4012.82	1207	9573.03	1207	5128.8	1207	7918.71	1207	3368.01	1207	13373.3	1207	8969.47
1208	10075.5	1208	5190.03	1208	11146	1208	6344.56	1208	7562.23	1208	3075.03	1208	12297.3	1208	7900.73
1209	10284.8	1209	4940.2	1209	9316.16	1209	4394.64	1209	8354.76	1209	3217.61	1209	12899	1209	7730.02
1210	10431.8	1210	4977.4	1210	12119.9	1210	7107.44	1210	10326.7	1210	5941.79	1210	13554	1210	8107.87
1211	9747.97	1211	4919.39	1211	10676.7	1211	6150.76	1211	11014.3	1211	6621.26	1211	12983.7	1211	7657.65
1212	9925.71	1212	4626.4	1212	10881.7	1212	5083.9	1212	13234.1	1212	7750.19	1212	12862.3	1212	7895.66
1213	13275.5	1213	7516.06	1213	10068.8	1213	4513.41	1213	14518.6	1213	8759.03	1213	12894	1213	8091.26
1214	11165.8	1214	5794.17	1214	9891.15	1214	4039.04	1214	17390	1214	10842.8	1214	12264.1	1214	8177.14
1215	11448.4	1215	6948.47	1215	10592.4	1215	5107.54	1215	17071.8	1215	11772.4	1215	10455	1215	7781.18
1216	9172.62	1216	6028.67	1216	9953.13	1216	6788.96	1216	17444.6	1216	12521.1	1216	6898.79	1216	6132.93
1217	8862.92	1217	6449.04	1217	9440.9	1217	5988.69	1217	13898	1217	10530	1217	4869.56	1217	5458.69
1218	7568.35	1218	5621.89	1218	10056	1218	6670.54	1218	10287.5	1218	9773.44	1218	4967.29	1218	5396.37
1219	8821.88	1219	5825.21	1219	9266.3	1219	6322.27	1219	10188.1	1219	8916.14	1219	6780.82	1219	6837.52
1220	12192.4	1220	8260.55	1220	9409.44	1220	6988.18	1220	9020.73	1220	5935.51	1220	9646.88	1220	7821.04
1221	12356.7	1221	7896.37	1221	8238.41	1221	4991.87	1221	6807.2	1221	4445.74	1221	11682.4	1221	8592.72
1222	11660.6	1222	6981.58	1222	6688.91	1222	5215.11	1222	5037.95	1222	3631.7	1222	12925.7	1222	8921.52
1223	11724.5	1223	7016.33	1223	6180.71	1223	5081.92	1223	4340.24	1223	3209.15	1223	14274.6	1223	9258.3
1224	12056.2	1224	7389.6	1224	5980.09	1224	3979.81	1224	5587.18	1224	4176.56	1224	13804.8	1224	8655.6
1225	10423	1225	7150.72	1225	5904.02	1225	4202.27	1225	6426.32	1225	5139.91	1225	13162.3	1225	9082.95
1226	5937.23	1226	4915.69	1226	6257.17	1226	3584.06	1226	7783.36	1226	5075.71	1226	11118.8	1226	7607.47
1227	4920.65	1227	3846.91	1227	6122.37	1227	3264.76	1227	8552.79	1227	9093.76	1227	9393.75	1227	6515.12
1228	5405.03	1228	4414.19	1228	6255.17	1228	3653.93	1228	9204.4	1228	8723.88	1228	12938.5	1228	8741.17
1229	8436.55	1229	5413.79	1229	6410.9	1229	5076.11	1229	9873.57	1229	8250.94	1229	18812.8	1229	11926.7
1230	11237.9	1230	6429.31	1230	6946.79	1230	4430.59	1230	12058.2	1230	8606.14	1230	14832.9	1230	9485.06
1231	19969.1	1231	8675.29	1231	6525.55	1231	3081.61	1231	12588.9	1231	6585.86	1231	12563.3	1231	8809.11
1232	19014.4	1232	8804.69	1232	5117.2	1232	2293.45	1232	10836.1	1232	7335.26	1232	9647.51	1232	7929.29
1233	19789.9	1233	9020.42	1233	4309.03	1233	3328.85	1233	10060.4	1233	7283.41	1233	6540.73	1233	5526.59
1234	20053.7	1234	8187.38	1234	4813.31	1234	3960.52	1234	8526.06	1234	6827.9	1234	5725.14	1234	5286.81
1235	18416.7	1235	7588.31	1235	6301.01	1235	5312.04	1235	8817.54	1235	8305.48	1235	5318.65	1235	5484.51
1236	18424.2	1236	8113.1	1236	7479.38	1236	6165.17	1236	8810.36	1236	6936.73	1236	4619.85	1236	4903.67
1237	17247.8	1237	6372.99	1237	9926.12	1237	7565.28	1237	8875.05	1237	5295.04	1237	4057.43	1237	4529.61
1238	14165.9	1238	5582.41	1238	11057	1238	8478.43	1238	9219.15	1238	5553.49	1238	3869.81	1238	4797.54
1239	12547.1	1239	5073.97	1239	14856.6	1239	13534.6	1239	9518.01	1239	4591.16	1239	7930.72	1239	9023.15
1240	11499.5	1240	4650.73	1240	16866.4	1240	14192.1	1240	9390.69	1240	6716.24	1240	12519.2	1240	10008.6
1241	12812.2	1241	5349.03	1241	15475.8	1241	14073.5	1241	8392.94	1241	5423.88	1241	14107.2	1241	10299.5
1242	16108.2	1242	8378.76	1242	14039.4	1242	10861.8	1242	8580.44	1242	6213.71	1242	13976.9	1242	10585.2
1243	17998	1243	9237.1	1243	13350.2	1243	10950.9	1243	7968.6	1243	5467.16	1243	14804.5	1243	10300.6
1244	16077.9	1244	8033.15	1244	10803.6	1244	9073.41	1244	8235.4	1244	5530.57	1244	14858.2	1244	11378.6
1245	16138.7	1245	9446.59	1245	10286.8	1245	9820.88	1245	8653.79	1245	5467.14	1245	13876.2	1245	11853
1246	14338.7	1246	8739.28	1246	10084.7	1246	9955.87	1246	9898.72	1246	4925.01	1246	14195.5	1246	12940.2
1247	12848.2	1247	8246.73	1247	9123.07	1247	7028.92	1247	13448.1	1247	5974.23	1247	14031	1247	12800.5
1248	14317.1	1248	8704.92	1248	9813.5	1248	8982.16	1248	14266.6	1248	6191.21	1248	12861.4	1248	12526.4
1249	15755.6	1249	8335.15	1249	8888.86	1249	9345.55	1249	15635.3	1249	10536.7	1249	11570.9	1249	11315
1250	15128.2	1250	7976.97	1250	7833.84	1250	8115.88	1250	13957.1	1250	12020.1	1250	11536.8	1250	10414.2
1251	15005	1251	7524.63	1251	7634.56	1251	7929.34	1251	12574.4	1251	9808.86	1251	13630.7	1251	11306.6
1252	15645.7	1252	8663.35	1252	6438.67	1252	6240.54	1252	13518.6	1252	10135.3	1252	15030	1252	11546.1
1253	16139.4	1253	7645.02	1253	5449.87	1253	4221.92	1253	15207.5	1253	10507.6	1253	16134	1253	12472.4
1254	16274.3	1254	8276.53	1254	6976.28	1254	4009.41	1254	15928.8	1254	9147.33	1254	15404.1	1254	11434.4
1255	17606.3	1255	8179.49	1255	7980.44	1255	6120.88	1255	13514	1255	6900.11	1255	15050.3	1255	10807.7
1256	20200.8	1256	8464.05	1256	7756.17	1256	6211.32	1256	13338.8	1256	6006.42	1256	14552.3	1256	12487.5
1257	21295.4	1257	10476.8	1257	7446.92	1257	4776.82	1257	12613.8	1257	5791.98	1257	12313.9	1257	11140.8
1258	22310.5	1258	10826.4	1258	7464.76	1258	3465.78	1258	12170.3	1258	4999.24	1258	12651.3	1258	11990.8
1259	24681.1	1259	11080	1259	7206.31	1259	5385.03	1259	11337.4	1259	4715.06	1259	11930.3	1259	10921.5
1260	24164.6	1260	10620.4	1260	6747.52	1260	4502.76	1260	9756.01	1260	5693.05	1260	11569.7	1260	9866.1
1261	22498.8	1261	10417.4	1261	6333.91	1261	3853.3	1261	9159.73	1261	7267.03	1261	12939.3	1261	9912.8
1262	21186.1	1262	9506.42	1262	4864.82	1262	3112.1	1262	9901.77	1262	8279.68	1262	15494	1262	10091
1263	18413	1263	8998.64	1263	4655.54	1263	3136.02	1263	10646.9	1263	7870.54	1263	17684.5	1263	12439.3
1264	23750.7	1264	10986.3	1264	4462.06	1264	2600.93	1264	10741.7	1264	6591.42	1264	16727.7	1264	12107.6
1265	28215.4	1265	14038.9	1265	4509.03	1265	3196.36	1265	10438	1265	6013.29	1265	15297	1265	9958.34
1266	27471.6	1266	14378.3	1266	3517.42	1266	3183.01	1266	9714.06	1266	4625.63	1266	17058.9	1266	11154.2
1267	25401.7	1267	13636.6	1267	2869.23	1267	1836.12	1267	8555.02	1267	3901.11	1267	15466.3	1267	9446.03
1268	21831.4	1268	12083.2	1268	3140.19	1268	2086.33	1268	8115.12	1268	5792.93	1268	16007	1268	10101.5
1269	18063.7	1269	10503.2	1269	3661.38	1269	2665.59	1269	7654.9	1269	4456.29	1269	13125.4	1269	10149
1270	17421.6	1270	9403.02	1270	2351.12	1270	1321.61	1270	8688.34	1270	7711.63	1270	11751.3	1270	9721.44
1271	16635.5	1271	9082.58	1271	2723.07	1271	1061.91	1271	8683.59	1271	6738.61	1271	11395.6	1271	9991.99
1272	17867.2	1272	9941.18	1272	2676.49	1272	1467.08	1272	7965.32	1272	7095.01	1272	11471.8	1272	9610.55
1273	15174.6	1273	8994.72	1273	4607.91	1273	2871.85	1273	7555.61	1273	7211.34	1273	11692.3	1273	9548.78
1274	12417.9	1274	8080.54	1274	3421.29	1274	1844.33	1274	6968.58	1274	7375.09	1274	13808.7	1274	10410.5
1275	11841.3	1275	8272.38	1275	3330.36	1275	2029.28	1275	7451.18	1275	8140.95	1275	16453.9	1275	10759.8
1276	11820	1276	7145.94	1276	4967.49	1276	3308.41	1276	8596.7	1276	7566.69	1276	18276.9	1276	11225.6
1277	15101.8	1277	7339.26	1277	7218.06	1277	3977.13	1277	10269.8	1277	9074.88	1277	18958.4	1277	11816.8
1278	19420.5	1278	8079.7	1278	5765.9	1278	3536.06	1278	11129	1278	9036.93	1278	19173.5	1278	12068.2
1279	18937.5	1279	7586.76	1279	6946	1279	3331.44	1279	11445.2	1279	7214.27	1279	18802.3	1279	12059.9
1280	19945.3	1280	8452.58	1280	7218.35	1280	3846.14	1280	11423.6	1280	8103.99	1280	18786.4	1280	12089.2
1281	21110.6	1281	9105.44	1281	7702.86	1281	4563.57	1281	11680.3	1281	8466.52	1281	19271.4	1281	11920.1
1282	23337.7	1282	10320.6	1282	8868.04	1282	4093.03	1282	11672.4	1282	7317.98	1282	16433	1282	9651.15
1283	22006.1	1283	10403.9	1283	9618.66	1283	4943.64	1283	11014.1	1283	7454.14	1283	18624.3	1283	11371.3
1284	15537.4	1284	7483.77	1284	8728.06	1284	4568.41	1284	10041.4	1284	6288.06	1284	18459.3	1284	12002.2
1285	12987.7	1285	6949	1285	7971.24	1285	4951.06	1285	8438.23	1285	6306.15	1285	15569.7	1285	8814.08
1286	12590.6	1286	6661.62	1286	7178.22	1286	4586.67	1286	7201.19	1286	6822.41	1286	13090.3	1286	7443.95
1287	14303.1	1287	6881.19	1287	7479.09	1287	5448.21	1287	7468.95	1287	7093.14	1287	11631.3	1287	6870.14
1288	13131.3	1288	6094.78	1288	7854.67	1288	5432.68	1288	7499.64	1288	3280.73	1288	9333.13	1288	8135.91
1289	12090	1289	6377.47	1289	8418.14	1289	6803.88	1289	8022.46	1289	3981.24	1289	9794.03	1289	9609.63
1290	9955.64	1290	5169.4	1290	7754.13	1290	6133.91	1290	7311.01	1290	3987.9	1290	14157.9	1290	12141.7
1291	10617.7	1291	4315.25	1291	6279.1	1291	3571.05	1291	7230.95	1291	2952.69	1291	17338.8	1291	13964.6
1292	7727.82	1292	3106.61	1292	4981.36	1292	1699.34	1292	7439.98	1292	2726.76	1292	15205.8	1292	12153.4
1293	7263.11	1293	3764.29	1293	4408.27	1293	1174.11	1293	9499.48	1293	4771.55	1293	15530.4	1293	11437.9
1294	7017.88	1294	3834.32	1294	4508.22	1294	1686.05	1294	9877.36	1294	5750.56	1294	17666.2	1294	12108.6
1295	7019.85	1295	2926.74	1295	5956.3	1295	3808.31	1295	10710.7	1295	6256.59	1295	17800.7	1295	12436.7
1296	6246.57	1296	1998.58	1296	8150.25	1296	5912.69	1296	10713.1	1296	7433.15	1296	16725.9	1296	11796
1297	12995.8	1297	4871.4	1297	7479.09	1297	5309.62	1297	9139.84	1297	5872.17	1297	16186	1297	13875.8
1298	16400	1298	7480.34	1298	6647.64	1298	3254.08	1298	9586.27	1298	5740.18	1298	16556.7	1298	14294.5
1299	17469.5	1299	8182.19	1299	7509.67	1299	3675.41	1299	8949.52	1299	4921.25	1299	19857.4	1299	15244.7
1300	22292.2	1300	10334.7	1300	9044.09	1300	5418.92	1300	8093.11	1300	4436.29	1300	20477.9	1300	13351.4
1301	25266.4	1301	13182.1	1301	9779.45	1301	8183.8	1301	6999.31	1301	4116.5	1301	18263.3	1301	12861
1302	22661.4	1302	12386.8	1302	10242.5	1302	8422.08	1302	6685.72	1302	4874.89	1302	17237.2	1302	13356.2
1303	22680.4	1303	12074.8	1303	10956.9	1303	10475.9	1303	6386.38	1303	5831.44	1303	17100.5	1303	13680.2
1304	23030.1	1304	11883.6	1304	8879.45	1304	9487.57	1304	5863.14	1304	5346.23	1304	20926.6	1304	16502.1
1305	22653.3	1305	12468.7	1305	8341.18	1305	8271.93	1305	6022.16	1305	5230.66	1305	18938.4	1305	14678.2
1306	20436.2	1306	11987	1306	9513.92	1306	9466.8	1306	6861.71	1306	6629.44	1306	20638.9	1306	14124.8
1307	21586.4	1307	12766.4	1307	10458	1307	9329.67	1307	7473.43	1307	7072.8	1307	19740.2	1307	13460.5
1308	20368.7	1308	11517.8	1308	10466	1308	7744.3	1308	7647.62	1308	8320.36	1308	19736.4	1308	12812.4
1309	20999.8	1309	11330.2	1309	9646.05	1309	5642.01	1309	8198.98	1309	7378.29	1309	19914.1	1309	11278.1
1310	21158.5	1310	9772.37	1310	8899.5	1310	4620.11	1310	9276.53	1310	8168.65	1310	21093.4	1310	12148
1311	20048.7	1311	9436.08	1311	8701.3	1311	5037.68	1311	8382.28	1311	5950.69	1311	21866.9	1311	13731.5
1312	13893.9	1312	6301.23	1312	8791.25	1312	4743.36	1312	7725.23	1312	4169.73	1312	21453.9	1312	12807.8
1313	16526.3	1313	7927.97	1313	9142.73	1313	5184.34	1313	7849.92	1313	4019.11	1313	23203.6	1313	14950
1314	10574.4	1314	4398.49	1314	8947.31	1314	5359.02	1314	6815.07	1314	3669.59	1314	21609.5	1314	13111.8
1315	11744	1315	4686.59	1315	8669.59	1315	4953.5	1315	10622.8	1315	5143.94	1315	22054	1315	15292.9
1316	13651.6	1316	5747.75	1316	9513.58	1316	5468.76	1316	9503.56	1316	4260.1	1316	21297.5	1316	14751.1
1317	18492.4	1317	8059.48	1317	9805.84	1317	7503.72	1317	11162.8	1317	5573.72	1317	20129.9	1317	13933.9
1318	24182.7	1318	10615.6	1318	9048.23	1318	8217.8	1318	10116.9	1318	4746.97	1318	21644.7	1318	15083.6
1319	25835.1	1319	11775.2	1319	9902.25	1319	9416.37	1319	10391.2	1319	5952.28	1319	21165.4	1319	14874.7
1320	25878.7	1320	12712.2	1320	11468.4	1320	10008.6	1320	8738.55	1320	4583.6	1320	20804.4	1320	13878.4
1321	21153.9	1321	12593	1321	12993.9	1321	10611.9	1321	8348.87	1321	5064.11	1321	22971.6	1321	15535.1
1322	18085.7	1322	10343.1	1322	12257.5	1322	10122.4	1322	8504.9	1322	4883.48	1322	22008.1	1322	14709.3
1323	18216.6	1323	8220.19	1323	13600	1323	11266.5	1323	8597.74	1323	4467.1	1323	19535.8	1323	12333.7
1324	17930.9	1324	8543.71	1324	17039.6	1324	15546.8	1324	9004.33	1324	5177.09	1324	19012.4	1324	11874.8
1325	19705.5	1325	10796.4	1325	15386.7	1325	12526.5	1325	9275.88	1325	4916.73	1325	18267.4	1325	12281.5
1326	20901	1326	12880.2	1326	14567.7	1326	13624.2	1326	10039.7	1326	4414.74	1326	17044.9	1326	12066.8
1327	18752.3	1327	11857.6	1327	15516.4	1327	13090.3	1327	13093.2	1327	6082.41	1327	18946.5	1327	12526.6
1328	16080	1328	9827.7	1328	17102.9	1328	15440.5	1328	14683.5	1328	10469.9	1328	18174.2	1328	11981.5
1329	15699.8	1329	8878.65	1329	18962.1	1329	15035.5	1329	13450.2	1329	11457.4	1329	17519.4	1329	12037.2
1330	16746	1330	9013.8	1330	19907.2	1330	16719.9	1330	14795.8	1330	8393.98	1330	15971.9	1330	12592.7
1331	18012.3	1331	10881.7	1331	19171.4	1331	16274.9	1331	14534	1331	10150.1	1331	16796.2	1331	12972.7
1332	17532.2	1332	10507.7	1332	19690	1332	15800.7	1332	13891.9	1332	9685	1332	15072	1332	11352
1333	17831.1	1333	10428.7	1333	17998.4	1333	13900.7	1333	13679	1333	9312.9	1333	14078.8	1333	9699.08
1334	18407.6	1334	9943.3	1334	15757	1334	11884.8	1334	12411.9	1334	8989.49	1334	15550.3	1334	10130
1335	22411	1335	11805.8	1335	13584.7	1335	10298.6	1335	11404.1	1335	8230.59	1335	15296.7	1335	8937.4
1336	20262.9	1336	9988.87	1336	13252.8	1336	9282.18	1336	10541.6	1336	8460.03	1336	15303	1336	9180.85
1337	20078.1	1337	10227	1337	12572	1337	8725.49	1337	9394.42	1337	8940.2	1337	14422.3	1337	9625.62
1338	21303.5	1338	11511.1	1338	13391.6	1338	9231.67	1338	8673.62	1338	7444.78	1338	15107.4	1338	9152.47
1339	22173.3	1339	11618.1	1339	15118.3	1339	9198.74	1339	8031.03	1339	7450.76	1339	14009.6	1339	8546.78
1340	21567.2	1340	10113.4	1340	13321.4	1340	9584.8	1340	7279.08	1340	7715.26	1340	12997.8	1340	8644.1
1341	19029.2	1341	8601.11	1341	11570	1341	8520.61	1341	8354.52	1341	7973.5	1341	14565.6	1341	9027.52
1342	17011.2	1342	7846.75	1342	10270.9	1342	8064.12	1342	9231.9	1342	6180.55	1342	14943.4	1342	11254.4
1343	16183.9	1343	8517.91	1343	9982.4	1343	6615.51	1343	9877.56	1343	6292.43	1343	15419.3	1343	9522.2
1344	17022.3	1344	10184.4	1344	9081.12	1344	5406.99	1344	10196.9	1344	6434.2	1344	13830.5	1344	8665.08
1345	20390.2	1345	12431	1345	7950.81	1345	4587.02	1345	10154.3	1345	6774.23	1345	14186.8	1345	8244.02
1346	15087.6	1346	8490.99	1346	7807.37	1346	4825.81	1346	10356.5	1346	6544.37	1346	14456.3	1346	8224.71
1347	14454.9	1347	7754.33	1347	7364.26	1347	5120.47	1347	9922.9	1347	5958.76	1347	14649.1	1347	8406.39
1348	12968.1	1348	7036.72	1348	6113.67	1348	5717.27	1348	10364.7	1348	6564.91	1348	14443.5	1348	9114.8
1349	14504.4	1349	8720.62	1349	4658.78	1349	5515.93	1349	10648.3	1349	6028.29	1349	14647.8	1349	8918.26
1350	13606.3	1350	7594.63	1350	4302.28	1350	4129.38	1350	10543.9	1350	6174.1	1350	15602.2	1350	10209.8
1351	16806.6	1351	9433.69	1351	4782.93	1351	4458.83	1351	11355.2	1351	5627.97	1351	16229.3	1351	10460.6
1352	15152.6	1352	9158.51	1352	3759.03	1352	2881.48	1352	11747	1352	5412.48	1352	15837.2	1352	10396.5
1353	16230.5	1353	10008	1353	4972.39	1353	3646.02	1353	10515.6	1353	7162.94	1353	15742.7	1353	10430.4
1354	12992.9	1354	6914.97	1354	5971.36	1354	3255.35	1354	9178.39	1354	7120.26	1354	15037.6	1354	10403
1355	12527.4	1355	6428.74	1355	7044.09	1355	5089.28	1355	9015.35	1355	5052.82	1355	15117	1355	10400.8
1356	12223.2	1356	7142.21	1356	8611.22	1356	6483.18	1356	8965.62	1356	4227.46	1356	15123	1356	10377.1
1357	14421.2	1357	8196.84	1357	11252.3	1357	8886.57	1357	8809.52	1357	4800.68	1357	15842.6	1357	9584.26
1358	16110.4	1358	8575.14	1358	12340	1358	9638.53	1358	9509.85	1358	4057.77	1358	17789.8	1358	11466.6
1359	14318.8	1359	6634.91	1359	11320.7	1359	9873.85	1359	9764.63	1359	4773.52	1359	18045	1359	10564.6
1360	13182.5	1360	5099.6	1360	8810.89	1360	7459.8	1360	9901.67	1360	5083.6	1360	18992.3	1360	10624.5
1361	13460.9	1361	5068.65	1361	7572.42	1361	6077.84	1361	8923.17	1361	4162.76	1361	19245.2	1361	11550.9
1362	14205.8	1362	5279.18	1362	7390.24	1362	5604.62	1362	9884.3	1362	5094.79	1362	16696.5	1362	9905.69
1363	13990.5	1363	5867.26	1363	7569.96	1363	4809.72	1363	9651.02	1363	5890.65	1363	15577.9	1363	11229.9
1364	12916.5	1364	5492.06	1364	8517.35	1364	4774.54	1364	9476.35	1364	5788.23	1364	16713.9	1364	11246.2
1365	16884.8	1365	7761.28	1365	9094.04	1365	5572.38	1365	9665.05	1365	7045.56	1365	16130.9	1365	11484.7
1366	16741.4	1366	7994.01	1366	8537.65	1366	6077.46	1366	9053.87	1366	6967.41	1366	13876.1	1366	10791.8
1367	19492.4	1367	9540.69	1367	8835.75	1367	6082.47	1367	7724.13	1367	6396.66	1367	12244.3	1367	9860.42
1368	18527.2	1368	9316.44	1368	9344.57	1368	8000.05	1368	7254.74	1368	6602.23	1368	12222.7	1368	9299.23
1369	19131.6	1369	8694.42	1369	7081.2	1369	6987.91	1369	6424.75	1369	6303.1	1369	11683.4	1369	8502.8
1370	19259.1	1370	9279.04	1370	6642.07	1370	7130.69	1370	7599	1370	7778.12	1370	11809.6	1370	8822.43
1371	15810.2	1371	6689.25	1371	6868.94	1371	6483.71	1371	8073.04	1371	8058.81	1371	12282.5	1371	8709.22
1372	12272.9	1372	5121.79	1372	6932.47	1372	6458.12	1372	9028.13	1372	8290.12	1372	13654.5	1372	9416.54
1373	13114.8	1373	5505.32	1373	8768.68	1373	7207.15	1373	8503.12	1373	5829.12	1373	13909.7	1373	10096.2
1374	12430.5	1374	5577.91	1374	10637.9	1374	7901.2	1374	6343.99	1374	4159.04	1374	16897.3	1374	12317.9
1375	11193.5	1375	5519.81	1375	10759.7	1375	8028.29	1375	7436.81	1375	5313.59	1375	17367.7	1375	13454.2
1376	14030.7	1376	8304.02	1376	8967.27	1376	6320.09	1376	7319.67	1376	5078.9	1376	18694.2	1376	16191.1
1377	21477.5	1377	12189.6	1377	7413.18	1377	5047.81	1377	8532.16	1377	7162.7	1377	17154.1	1377	14556.1
1378	25724.9	1378	13234.5	1378	6505.22	1378	4640.36	1378	9161.16	1378	7241.36	1378	14819.2	1378	12834.5
1379	26528.8	1379	13362.1	1379	5940.91	1379	4636.24	1379	10212.3	1379	8246.06	1379	14129.2	1379	11040.2
1380	24767	1380	12018.7	1380	6763.53	1380	5248.94	1380	10605	1380	7062.41	1380	13385.6	1380	7956.54
1381	21099	1381	10573.7	1381	6310.58	1381	4312	1381	10361.9	1381	5977.29	1381	10155.8	1381	5743.66
1382	24394	1382	12040	1382	6315.09	1382	4928.49	1382	10529.8	1382	6498.04	1382	3322.91	1382	1140.54
1383	25049.2	1383	12035.6	1383	6959.56	1383	5796.27	1383	10999.3	1383	6190.81	1383	1417.61	1383	985.56
1384	24243.5	1384	11556	1384	7009.44	1384	6298.8	1384	10842.9	1384	5881.52	1384	1716.59	1384	2209.36
1385	21674	1385	11345.2	1385	8126.02	1385	6947.07	1385	10723.9	1385	6598.44	1385	3564.82	1385	3954.75
1386	19965.8	1386	10227.7	1386	9729.84	1386	7766.78	1386	10982.6	1386	5385.37	1386	4434.9	1386	4579.57
1387	18927.2	1387	9333.71	1387	10361.1	1387	6950.19	1387	10105.3	1387	4660.7	1387	4422.61	1387	5034.76
1388	17643.6	1388	8443.65	1388	11887	1388	8626.47	1388	10506.6	1388	4782.72	1388	8146.89	1388	8677.89
1389	19737.8	1389	8929.7	1389	10066.3	1389	8580.62	1389	11281.5	1389	5159.08	1389	12845.9	1389	10483.2
1390	20953.8	1390	8788.9	1390	7036.39	1390	6169.63	1390	11514.4	1390	4680.39	1390	14127.9	1390	8851.09
1391	19079.8	1391	7335.98	1391	6191.89	1391	5967.01	1391	11986.4	1391	5344.06	1391	13481.9	1391	10100.7
1392	17508.9	1392	7331.02	1392	7061.31	1392	7186.62	1392	12479.8	1392	6327.67	1392	11796.3	1392	10643.3
1393	18350.9	1393	8697.27	1393	6620.85	1393	6743.27	1393	11746	1393	6673.64	1393	9236.53	1393	7393.2
1394	19940.7	1394	9447.83	1394	7087.41	1394	5495.49	1394	10922.9	1394	7481.44	1394	7334.94	1394	5461.29
1395	19946.2	1395	8948.31	1395	7239	1395	5198.97	1395	11440.8	1395	6582.22	1395	7963.26	1395	6451.09
1396	18702.9	1396	9525.81	1396	7396.8	1396	5723.93	1396	11196.9	1396	6838.83	1396	5783.16	1396	5424.38
1397	17811.7	1397	10075.6	1397	6861.96	1397	5484.49	1397	10853.3	1397	6267.94	1397	4471.84	1397	4419.48
1398	20340.9	1398	11314.9	1398	6634.77	1398	5341.95	1398	11645.8	1398	6429.81	1398	3740.32	1398	4553.1
1399	23786.1	1399	13667.4	1399	5464.03	1399	5047.59	1399	12499.3	1399	6535.44	1399	3175.88	1399	4245.18
1400	23150.3	1400	13246.6	1400	5286.88	1400	5037.77	1400	13946.7	1400	7349.23	1400	3269.32	1400	3152.5
1401	25329.6	1401	13622.5	1401	5882.2	1401	6261.81	1401	13093.3	1401	7645.24	1401	4107.65	1401	2340.43
1402	23978.2	1402	13685	1402	4946.92	1402	5099.98	1402	12527.5	1402	6522.27	1402	5558.64	1402	2909.39
1403	21148.9	1403	11277.9	1403	7518.61	1403	8575.8	1403	10291.3	1403	4665.86	1403	4143.24	1403	3141.73
1404	23351.2	1404	11530.8	1404	8205.93	1404	7983.39	1404	9005.23	1404	4655.23	1404	7078.62	1404	4105.49
1405	20469.1	1405	10228.5	1405	8406.91	1405	5646.28	1405	8648.66	1405	5050.93	1405	9310.03	1405	4581.87
1406	18963.3	1406	9434.4	1406	9283.73	1406	5474.33	1406	8663.14	1406	6006.97	1406	11166.3	1406	5450.79
1407	20475.4	1407	10890.9	1407	10626.4	1407	5558.74	1407	9051.58	1407	5363.06	1407	11986.5	1407	7398.72
1408	17020.4	1408	9246.8	1408	9019.28	1408	4197.59	1408	8125.73	1408	4982.21	1408	12666.3	1408	7171
1409	14713.1	1409	7742.32	1409	7962.89	1409	4558.04	1409	9147.51	1409	6893.3	1409	11745.2	1409	6252.71
1410	14788.3	1410	8298.46	1410	7856.86	1410	5840.06	1410	11176.6	1410	8498.7	1410	10903.8	1410	6004.07
1411	14493.4	1411	8270.08	1411	8555.36	1411	4854.95	1411	13315.4	1411	9851.34	1411	10606.8	1411	4740.84
1412	15102.8	1412	5956.35	1412	8359.89	1412	4301.41	1412	13191.3	1412	8428.73	1412	9345.04	1412	3612.8
1413	19153.9	1413	8255.11	1413	7049.28	1413	4129.68	1413	13417.7	1413	8555.5	1413	8165.86	1413	3107.67
1414	20703.6	1414	8420.37	1414	8408.47	1414	3756.02	1414	12543.8	1414	8532.13	1414	5750.1	1414	1091.77
1415	20989.3	1415	8529.98	1415	8442.72	1415	4859.85	1415	10960	1415	7602.57	1415	2585.41	1415	692.442
1416	21777.7	1416	9080.06	1416	6799.85	1416	4462.81	1416	9942.64	1416	7614.81	1416	2919.77	1416	1368.67
1417	21630.1	1417	11448.9	1417	7189.22	1417	5450.07	1417	8581.85	1417	5733.79	1417	3590.22	1417	3277.04
1418	21605.1	1418	11089.9	1418	7841.33	1418	6118.98	1418	8350	1418	5254.75	1418	5816.65	1418	4277.48
1419	20810.3	1419	10229.3	1419	7901.67	1419	7380.1	1419	8815.93	1419	5353.24	1419	4784.94	1419	3776.06
1420	20786.1	1420	9671.44	1420	7583.38	1420	6490.12	1420	8457.54	1420	4604.64	1420	4771	1420	4820.52
1421	20761.3	1421	9570.59	1421	8562.63	1421	5779.24	1421	7150.3	1421	3544.24	1421	5812.77	1421	5506.38
1422	19011.1	1422	8400.61	1422	8070.48	1422	5297.02	1422	5946.7	1422	3472.74	1422	7083.26	1422	6140.35
1423	20411.9	1423	9470.56	1423	8707.2	1423	6255.94	1423	5778.86	1423	3345.25	1423	7367.58	1423	6027.75
1424	21240.1	1424	11038.5	1424	8054.51	1424	5520.53	1424	5212.2	1424	2334.86	1424	8030.41	1424	6078.62
1425	21025.1	1425	10170.3	1425	8924.08	1425	7173.64	1425	4808.3	1425	3372.88	1425	9205	1425	6741.66
1426	22806.5	1426	10643.2	1426	8624.26	1426	7499.48	1426	5655.09	1426	5148.49	1426	9864.35	1426	6802.21
1427	22408.2	1427	10705.9	1427	9521.07	1427	7191	1427	6764.68	1427	6089.51	1427	8945.94	1427	6427.52
1428	21617.7	1428	9889.98	1428	8222.29	1428	6683.01	1428	8450.03	1428	6594.58	1428	8394.66	1428	6323.3
1429	22345.4	1429	8843.76	1429	8913.99	1429	8551.88	1429	9713.85	1429	7105.29	1429	7534.28	1429	6243.81
1430	22105.3	1430	9603.77	1430	11538.6	1430	8323.57	1430	9228.83	1430	6848.75	1430	6445.97	1430	5697.75
1431	20561.6	1431	10840.7	1431	11661.5	1431	7271.57	1431	7707.23	1431	5512.54	1431	6313.41	1431	5369.88
1432	20108.6	1432	10393.4	1432	10682.1	1432	6652	1432	5925.37	1432	5016.68	1432	5589.85	1432	4504.99
1433	19655.7	1433	8718.7	1433	10551	1433	8012.98	1433	4667.46	1433	3995.77	1433	5834.59	1433	5054.45
1434	18586.4	1434	8989.5	1434	11591.8	1434	8392.4	1434	6508.1	1434	6665.19	1434	6894.9	1434	5658.77
1435	17212.8	1435	8593.31	1435	12536.2	1435	8471.76	1435	8191.63	1435	6754.55	1435	6487.68	1435	5082.81
1436	16322	1436	7370.59	1436	13720.9	1436	8326.98	1436	9585.91	1436	6745.1	1436	7743.37	1436	6298.69
1437	18005.7	1437	8959.67	1437	13330.4	1437	8626.56	1437	9365.07	1437	6222.48	1437	8457.42	1437	7467.65
1438	17214.5	1438	8623.26	1438	12912.9	1438	8484.7	1438	8687.9	1438	6497.39	1438	9176.17	1438	8159.78
1439	17563.6	1439	9802.17	1439	12819.2	1439	8371.5	1439	7887.47	1439	6107.62	1439	9404.11	1439	7581.5
1440	17830.5	1440	10204.5	1440	10997.7	1440	5791.48	1440	6883.19	1440	6323.71	1440	10311.9	1440	7721.99
1441	19173.3	1441	10765.5	1441	8562.5	1441	6388.45	1441	6361.44	1441	5216.61	1441	10548.3	1441	6081.88
1442	20088.9	1442	11197.9	1442	9505.07	1442	6528.85	1442	7799.63	1442	4656.07	1442	11061.5	1442	7318.83
1443	20236.1	1443	13384	1443	8448.6	1443	6333.1	1443	7185.9	1443	3623.6	1443	12203	1443	6908.23
1444	20369.3	1444	12888.9	1444	8366.13	1444	6365.69	1444	7563.78	1444	4967.27	1444	12656.6	1444	8318.9
1445	19287.4	1445	11002.7	1445	8792.88	1445	7359.08	1445	6968.35	1445	5413.61	1445	12624.3	1445	7155.33
1446	17690.5	1446	9727.69	1446	9419.44	1446	7578.99	1446	6891.65	1446	4282.24	1446	11190.2	1446	6054.23
1447	17793.1	1447	8816.65	1447	11284.7	1447	7632.78	1447	7582.92	1447	4444.24	1447	12635	1447	7170.5
1448	23588.8	1448	9730.93	1448	12824.2	1448	9062.72	1448	7735.35	1448	4768.23	1448	13891.4	1448	9363.96
1449	19667.1	1449	8506.89	1449	11506.7	1449	9478.28	1449	7161.86	1449	4545.77	1449	13356.5	1449	8573.64
1450	22746.3	1450	10353.4	1450	9391.46	1450	7335.73	1450	7280.05	1450	5017.57	1450	12963	1450	8441.17
1451	23809.7	1451	10430	1451	9692.62	1451	8959.23	1451	8236.1	1451	6256.4	1451	12819.5	1451	10039.9
1452	14165.5	1452	4102.61	1452	10385.2	1452	9930.14	1452	8676.71	1452	6692.82	1452	12153.5	1452	11199.8
1453	13859.7	1453	4619.01	1453	9767.99	1453	7835.3	1453	9830.47	1453	6464.4	1453	9306.28	1453	8720.87
1454	10533.4	1454	3228.17	1454	9720.27	1454	7974.55	1454	9172.19	1454	5736.75	1454	7460.97	1454	7859.89
1455	18133.6	1455	6626.51	1455	10283.4	1455	9248.65	1455	8567.89	1455	5661.2	1455	6285.94	1455	6740.45
1456	22336.5	1456	10298.3	1456	6285.09	1456	7321.27	1456	8267.74	1456	6367.78	1456	5346.65	1456	6711.32
1457	21497.8	1457	10921.6	1457	5485.33	1457	5974.59	1457	8135.9	1457	5662.92	1457	3096.86	1457	4964.36
1458	20286	1458	11270.7	1458	5266.14	1458	6040.85	1458	7651.39	1458	5115.89	1458	4056.04	1458	3757.41
1459	13928.4	1459	8605.1	1459	4630.92	1459	4515.63	1459	6816.62	1459	5993.64	1459	5087.43	1459	3285.97
1460	9168.96	1460	7379.68	1460	4757.61	1460	4566.2	1460	5684.26	1460	6789.77	1460	6523.45	1460	3187.67
1461	6282.2	1461	5245.04	1461	5037.62	1461	3026.41	1461	5937.22	1461	8160.03	1461	9709.25	1461	4872.54
1462	12674.6	1462	7457.75	1462	5970.69	1462	5165.6	1462	7120.2	1462	8486.37	1462	11334.5	1462	5404.56
1463	10840.6	1463	6943.51	1463	7762.96	1463	4769.84	1463	7751.1	1463	7925.89	1463	12913.4	1463	7566.37
1464	13191.6	1464	6976.08	1464	9914.02	1464	5527.91	1464	7686.75	1464	6292.42	1464	11539.2	1464	6803.68
1465	16992.8	1465	8730.45	1465	11669.4	1465	8529.17	1465	9151.71	1465	8281.32	1465	12438.2	1465	8349.93
1466	16762.5	1466	8449.08	1466	13606.7	1466	10092.7	1466	11628.9	1466	7401.29	1466	9878.14	1466	6157.35
1467	15708.3	1467	7519.81	1467	14651.7	1467	11504.2	1467	11182.7	1467	5905.99	1467	9532.1	1467	5351.76
1468	16292.7	1468	8804.48	1468	15660.6	1468	11899.8	1468	10258.7	1468	4757.86	1468	9296.27	1468	4979.22
1469	15451.5	1469	7939.94	1469	16739.8	1469	14204.1	1469	7776.89	1469	5059.1	1469	9694.53	1469	6214.78
1470	16762.8	1470	8489.95	1470	17012.3	1470	12359.1	1470	8201.16	1470	4543.43	1470	8054.94	1470	5169.8
1471	13857	1471	6821.98	1471	13814.3	1471	9619.26	1471	7554.53	1471	3611.92	1471	7194.94	1471	4385.94
1472	15281.3	1472	8182.2	1472	14186.1	1472	9315.12	1472	5742.43	1472	3727.39	1472	7131.65	1472	4886.72
1473	12857.2	1473	7806.93	1473	13851.8	1473	8899.12	1473	4184.04	1473	2660.74	1473	7110.98	1473	5442.14
1474	13854.4	1474	7509.34	1474	13184.9	1474	7753	1474	5138.01	1474	2811.84	1474	8092.65	1474	6576.83
1475	11001.5	1475	6398.47	1475	12818.1	1475	7883.93	1475	1749.05	1475	992.015	1475	9155.17	1475	6735.13
1476	8650.09	1476	5103.2	1476	12208.4	1476	8455.91	1476	661.756	1476	1226.77	1476	7943.57	1476	5007.77
1477	6739.02	1477	5013.43	1477	10773.1	1477	7287.92	1477	148.493	1477	535.806	1477	6341.37	1477	3857.92
1478	7982.16	1478	4484.15	1478	10944.6	1478	7865.8	1478	824.562	1478	1756.67	1478	7189.15	1478	4636.36
1479	7076.55	1479	4399.83	1479	11399	1479	8117.16	1479	917.729	1479	1415.41	1479	7925.31	1479	5560.55
1480	9584.99	1480	4131.74	1480	11692.7	1480	8402.4	1480	2229.17	1480	1260.8	1480	9555.59	1480	6563.65
1481	12445.2	1481	6060.37	1481	11541.6	1481	7073.34	1481	2540.19	1481	620.358	1481	9471.33	1481	7998.36
1482	11744.7	1482	7565.57	1482	12287.6	1482	8101.61	1482	3345.45	1482	1340.99	1482	8109.35	1482	6357.64
1483	14837.5	1483	9580.32	1483	12313.9	1483	8467.82	1483	4485.76	1483	1445.57	1483	6831.5	1483	5737.26
1484	16065.1	1484	10616.9	1484	10318.4	1484	9048.82	1484	4414.74	1484	1417.28	1484	7446.86	1484	6507.73
1485	16633.5	1485	10523	1485	11292.6	1485	9945.81	1485	4299.45	1485	1571.44	1485	7329.3	1485	5470.4
1486	22128.9	1486	11800.1	1486	12980.7	1486	9595.89	1486	3761.78	1486	2336.08	1486	7800.97	1486	5000.75
1487	21307.6	1487	11762.6	1487	13004	1487	9793.28	1487	3198.1	1487	1796.58	1487	9161.88	1487	7001.72
1488	24773.4	1488	11924.5	1488	13231.5	1488	8962.34	1488	2850.04	1488	2169.15	1488	9863.1	1488	7962.36
1489	24387.6	1489	11165.3	1489	13344.6	1489	8832.35	1489	2245.08	1489	1715.77	1489	9777.53	1489	8323.03
1490	20508.1	1490	9069.87	1490	13217	1490	9301.24	1490	2409.95	1490	1564.59	1490	9880.21	1490	7513.15
1491	19468.7	1491	8570.03	1491	12716.8	1491	9131.62	1491	2663.41	1491	1691.83	1491	9977.96	1491	7456.52
1492	18743.6	1492	9286.22	1492	11916.5	1492	9129.69	1492	4176.7	1492	2981.35	1492	9838.62	1492	7138.56
1493	15387.8	1493	8463.2	1493	11627.6	1493	9021.1	1493	5080.86	1493	3471.87	1493	8424.92	1493	6673.5
1494	13214.8	1494	6679.95	1494	10759.2	1494	8358	1494	5386.78	1494	3844.4	1494	7760.68	1494	6577.82
1495	14644.3	1495	7583.22	1495	10149.9	1495	6691.21	1495	5864.23	1495	3860.79	1495	7743.43	1495	5937.72
1496	16026.5	1496	9238.57	1496	12744.3	1496	8778.78	1496	5635.03	1496	3930.73	1496	9406.84	1496	6340.42
1497	18884.2	1497	11517.7	1497	11624.7	1497	8349.7	1497	5846.5	1497	3417.47	1497	11347.9	1497	7129.42
1498	19543.2	1498	11550.4	1498	10201.5	1498	5818.68	1498	6184.1	1498	3395.1	1498	11646.3	1498	7566.3
1499	21398.8	1499	13391.2	1499	10061.8	1499	4933.11	1499	6314.44	1499	3472.96	1499	12382.7	1499	8347.98
1500	21043.9	1500	12086	1500	9909.36	1500	6195.99	1500	6058.29	1500	3246.18	1500	17537	1500	10364
1501	17862.2	1501	10351.1	1501	9529.18	1501	6010.65	1501	5948.73	1501	3149.26	1501	17295.2	1501	10663.4
1502	14824.8	1502	8455.2	1502	8293.54	1502	4446.53	1502	4295.65	1502	3636.79	1502	17503.5	1502	10433.9
1503	13905.6	1503	8035.01	1503	7408.78	1503	4907.81	1503	3812.34	1503	3785.1	1503	18172.3	1503	13715.8
1504	14092.7	1504	7641.54	1504	7221.73	1504	5048.26	1504	3564.98	1504	4605.73	1504	17769.5	1504	13640.1
1505	14863.9	1505	7639.56	1505	7323.12	1505	4830.74	1505	2316.16	1505	3188.26	1505	15527.5	1505	12294.4
1506	15299	1506	8784.65	1506	6813.1	1506	4193.22	1506	1005.55	1506	2197.69	1506	12804.6	1506	9639.93
1507	15811.1	1507	9164.17	1507	5979.69	1507	6146.61	1507	1900.29	1507	3283.07	1507	10173.2	1507	7574.98
1508	15462.5	1508	8994.35	1508	6282.24	1508	6742.15	1508	1389.47	1508	834.816	1508	9272.62	1508	7629.03
1509	13321	1509	8000.04	1509	5225.2	1509	5135.19	1509	2661.34	1509	1682.03	1509	9129.14	1509	7462.57
1510	11951.2	1510	7083.01	1510	4782.37	1510	3612.12	1510	4768.39	1510	2660.32	1510	9077.65	1510	7625.36
1511	12294.9	1511	6587.44	1511	4320.98	1511	2194.3	1511	5841.66	1511	2732.8	1511	8087.24	1511	7105.62
1512	14405.3	1512	7639.13	1512	5618.73	1512	2170.54	1512	7094.3	1512	3535.09	1512	6838.58	1512	6261.4
1513	16623.4	1513	9524.98	1513	6306.78	1513	3792.22	1513	6533.26	1513	3779.59	1513	6739.59	1513	6967.21
1514	17300.7	1514	10534.5	1514	7109.69	1514	4943.02	1514	6040.04	1514	3679.8	1514	7070.03	1514	7847.69
1515	15061.7	1515	9249.61	1515	8726.36	1515	7043.26	1515	3326.6	1515	3396.28	1515	7686.34	1515	7942.94
1516	12585.1	1516	7493.7	1516	10176	1516	6596.51	1516	1867.17	1516	2294.55	1516	9001.82	1516	7900.34
1517	11961.8	1517	7032.12	1517	9541.55	1517	5621.89	1517	776.77	1517	563.578	1517	10224.7	1517	8165.86
1518	11626.6	1518	7097.8	1518	8090.47	1518	4684.35	1518	925.873	1518	803.058	1518	11219.2	1518	8710.41
1519	11387.3	1519	6437.58	1519	6235.52	1519	4783.93	1519	625.001	1519	369.782	1519	12365.2	1519	8868.83
1520	11365.2	1520	5665.62	1520	6972.06	1520	5006.69	1520	1241.58	1520	558.959	1520	12374.8	1520	9823.58
1521	10371.4	1521	5101.81	1521	10224.6	1521	6742.72	1521	2029.63	1521	411.384	1521	12598.7	1521	9985.67
1522	9325.47	1522	4832.32	1522	8776.79	1522	5056.9	1522	2429.74	1522	716.459	1522	12928.8	1522	9068.28
1523	9272.46	1523	4502.44	1523	11536.2	1523	5487.05	1523	2812.06	1523	1195.86	1523	13456.8	1523	10832.8
1524	11389.1	1524	5578.13	1524	11860.6	1524	5847.28	1524	3217.07	1524	1952.62	1524	12345.6	1524	11561
1525	11406	1525	5582.83	1525	11362.8	1525	5809.07	1525	2513.65	1525	1425.56	1525	12893.9	1525	11918
1526	11107.6	1526	5903.08	1526	9851.09	1526	4526.71	1526	2697.71	1526	2549.98	1526	12891.1	1526	10202.9
1527	11066.5	1527	6170.5	1527	11088	1527	5419.06	1527	1942.83	1527	2335.19	1527	12390	1527	11322.8
1528	11007.7	1528	6126.49	1528	11016.3	1528	6301.79	1528	1419.6	1528	2419.37	1528	12263.7	1528	8912.77
1529	12758.4	1529	6303.56	1529	10322.8	1529	7118.77	1529	2077.38	1529	2275.65	1529	12429.4	1529	8311.72
1530	14111.3	1530	6836.84	1530	11832.9	1530	6814.07	1530	4654	1530	4813.5	1530	12552.6	1530	9886.82
1531	14755.3	1531	7373.84	1531	10379.3	1531	6880.74	1531	5903.88	1531	5081.63	1531	11135.9	1531	9895.77
1532	16150.7	1532	8589.53	1532	11692.8	1532	7787.05	1532	6661.56	1532	5193.85	1532	12672.9	1532	8634.48
1533	16497.5	1533	8581.67	1533	10429.3	1533	8045.08	1533	8783.75	1533	6201.43	1533	12804	1533	7509.5
1534	15509.6	1534	7012.67	1534	11858.5	1534	9907.27	1534	10012.1	1534	6558.64	1534	11992.8	1534	7059.18
1535	15018.9	1535	5389.25	1535	12553.9	1535	10617.6	1535	8142	1535	5876.44	1535	12239.7	1535	7515.6
1536	15784.9	1536	5012.81	1536	13317.6	1536	10710.8	1536	6629.5	1536	6033.2	1536	12860.3	1536	9573.59
1537	15431.8	1537	4572.94	1537	14776.4	1537	12328.8	1537	6062.01	1537	7250.7	1537	11933.5	1537	9688.11
1538	19183.1	1538	6619.27	1538	14734.6	1538	11277.9	1538	6180.2	1538	6673.93	1538	11914.3	1538	10276.1
1539	19148	1539	6932.03	1539	15521.8	1539	11417.5	1539	6319.26	1539	4975.53	1539	12292.6	1539	10611.3
1540	19465.5	1540	7966.55	1540	14606.5	1540	11146.8	1540	6502.39	1540	4688.68	1540	12046.8	1540	11744.5
1541	20342.9	1541	9295.34	1541	15431.8	1541	12989.7	1541	5413.62	1541	4282.27	1541	11672.4	1541	11359.4
1542	20387.5	1542	9540.03	1542	14593.6	1542	12170.7	1542	7026.23	1542	6192.19	1542	12770.8	1542	12736.4
1543	20422.5	1543	8829.2	1543	14052	1543	10645.2	1543	7737.5	1543	7287.07	1543	15935.1	1543	14289.2
1544	19773.6	1544	8704.14	1544	12723	1544	8665.73	1544	7059.71	1544	6467.41	1544	15099.8	1544	14484.5
1545	18940.8	1545	8818.85	1545	11327.9	1545	8651.57	1545	5604.31	1545	6703.98	1545	18190.8	1545	16308.5
1546	16550.7	1546	7215.23	1546	9520.85	1546	8317.06	1546	4248.65	1546	4255.21	1546	17554.4	1546	16726.5
1547	14759.8	1547	5863.89	1547	8991.4	1547	7741.24	1547	4127.78	1547	3569.73	1547	18576.8	1547	18260.4
1548	14719.6	1548	6051.77	1548	8502.81	1548	9069.07	1548	4365.16	1548	3780.93	1548	23152.6	1548	22953.2
1549	17315.5	1549	7331.88	1549	7122.32	1549	6956.66	1549	4712.02	1549	3978.03	1549	27465.1	1549	26379.2
1550	19070.9	1550	8364.35	1550	5723.72	1550	5395.32	1550	4315.84	1550	5449.15	1550	24869.5	1550	24590
1551	18979.2	1551	8226.33	1551	4861.98	1551	4873.04	1551	4753.06	1551	4869.52	1551	24717	1551	24042.1
1552	17566.9	1552	7064.11	1552	5206.57	1552	4976.47	1552	5829.65	1552	5434.96	1552	27493.4	1552	23463.1
1553	17776.8	1553	7191.51	1553	5617.6	1553	4973.33	1553	6719.64	1553	5987.77	1553	26094.8	1553	22382.4
1554	20416.4	1554	8712.64	1554	6009.16	1554	4671.15	1554	6238.08	1554	6421.6	1554	26181.7	1554	18958.7
1555	20485.2	1555	8285.76	1555	6187.94	1555	4903.69	1555	6358.41	1555	5445.15	1555	22421.5	1555	13437.7
1556	22470.1	1556	9621.03	1556	6561.14	1556	5125.88	1556	5962.06	1556	5137.71	1556	25447.8	1556	18378.2
1557	27283.8	1557	12434.7	1557	6670.08	1557	4553	1557	6679.47	1557	5341.77	1557	25091.5	1557	20124.4
1558	27587.8	1558	12899.4	1558	6721.88	1558	3764.19	1558	6696.6	1558	5744.37	1558	23525.2	1558	19377.5
1559	27313	1559	12550.4	1559	7086.56	1559	4232.93	1559	7268.44	1559	6920.62	1559	23541.3	1559	21577.5
1560	26408.1	1560	12186.4	1560	7501.3	1560	5637.22	1560	6925.64	1560	6470.8	1560	20548.8	1560	15199.4
1561	26127.2	1561	12407.3	1561	8270.82	1561	7309.67	1561	8347.48	1561	7850.73	1561	21114.1	1561	17292.3
1562	26363.7	1562	14595.7	1562	7300.81	1562	6590.07	1562	7702.37	1562	8176.26	1562	20685.4	1562	17917.1
1563	26225.8	1563	13223.5	1563	5858.27	1563	5236.52	1563	7774.95	1563	8416.65	1563	20943.3	1563	17457.1
1564	27164.2	1564	15433.8	1564	4349.37	1564	4638.15	1564	8391.33	1564	9148.41	1564	19945.5	1564	15656.4
1565	25716.9	1565	14506.8	1565	4001.8	1565	3002.39	1565	10088.5	1565	11185.8	1565	17060.8	1565	11646
1566	27586.4	1566	14961.1	1566	3781.93	1566	4367.78	1566	8276.66	1566	8221.32	1566	18098.9	1566	13309.2
1567	24262.3	1567	13618.1	1567	4459.91	1567	5344.04	1567	8064.52	1567	8279.77	1567	18648.2	1567	14822.5
1568	26959.3	1568	15000.4	1568	5629.55	1568	6378.1	1568	8476.74	1568	8611.39	1568	19265.9	1568	17023.6
1569	25280.8	1569	13787.7	1569	6318.67	1569	6580.04	1569	6494.66	1569	5701.06	1569	19269.3	1569	17732
1570	21228.4	1570	11329.1	1570	8067.07	1570	6974.5	1570	8888.9	1570	7584.27	1570	16003.5	1570	12429.6
1571	25019.5	1571	13698.6	1571	7982.28	1571	6118.88	1571	11290.5	1571	10804.4	1571	17517.9	1571	14988
1572	21342.9	1572	11576.8	1572	9013.52	1572	6866.19	1572	11156.2	1572	11034.7	1572	18053.4	1572	15408.4
1573	18825.4	1573	9856.04	1573	8820.42	1573	6760.44	1573	12202.4	1573	11639	1573	18820.4	1573	15511.3
1574	16864.5	1574	8582.66	1574	9144.11	1574	6677.98	1574	12453.3	1574	12977.6	1574	19124	1574	14678.3
1575	17232.5	1575	7470.94	1575	9096.14	1575	6761.56	1575	13449.9	1575	11498.7	1575	17715.5	1575	13274.9
1576	18599.4	1576	8565.27	1576	7171.92	1576	5794.98	1576	13034.9	1576	11547.1	1576	18932.8	1576	14889.2
1577	16228.7	1577	7852.26	1577	7718.38	1577	5029.12	1577	12434.7	1577	11907.6	1577	17908.9	1577	16218.2
1578	16393.8	1578	8571.27	1578	5966.78	1578	4645.64	1578	12329.5	1578	10030.1	1578	17005.2	1578	16670.4
1579	13097.7	1579	7505.08	1579	7771.88	1579	5779.84	1579	13570	1579	10755.7	1579	16426.8	1579	16420.7
1580	11081.2	1580	6789.74	1580	5128.65	1580	4940.32	1580	13152.9	1580	9906.65	1580	16105	1580	15077.3
1581	12320.3	1581	5628.82	1581	4495.16	1581	4314.63	1581	10714.5	1581	7072.45	1581	15598.9	1581	15874.8
1582	15357.8	1582	6551.28	1582	2831.96	1582	2881.55	1582	9824.41	1582	5953.44	1582	14740.3	1582	15047.7
1583	18886.6	1583	8997.08	1583	2264.14	1583	1620.37	1583	11578.7	1583	8675.35	1583	16200.7	1583	15465.8
1584	21210.3	1584	11370.9	1584	2661.58	1584	2277.79	1584	11843.4	1584	9039.35	1584	15412.9	1584	14796.8
1585	19137.9	1585	11469.8	1585	3499.3	1585	2833.76	1585	11278.8	1585	8426.94	1585	16573	1585	14969.4
1586	19415.3	1586	12009.4	1586	3944.93	1586	2496.2	1586	12381.4	1586	8148.09	1586	16535.6	1586	14574
1587	20239.8	1587	13203.4	1587	6152.17	1587	4302.21	1587	9558.44	1587	6654.58	1587	15921.8	1587	14491
1588	19346.8	1588	11922.8	1588	6554.71	1588	3940.37	1588	8390.52	1588	4998.23	1588	19194.6	1588	16844.2
1589	19772.3	1589	13045.4	1589	7172.21	1589	4640.1	1589	10166.6	1589	6983.98	1589	17553.2	1589	15901.2
1590	19873.7	1590	12258.3	1590	7364.8	1590	4771.19	1590	10729.9	1590	7188.69	1590	17078.5	1590	16505.9
1591	17972.8	1591	10220.8	1591	8398.11	1591	6610.97	1591	11100.5	1591	8782.54	1591	19585.1	1591	18118.7
1592	15673.7	1592	8203.72	1592	9011.09	1592	7271.5	1592	12570.3	1592	9197.59	1592	18074.7	1592	17756.5
1593	14924.2	1593	7544.66	1593	8901.54	1593	6327.66	1593	12825.1	1593	7809.61	1593	16879.7	1593	16540.8
1594	12575.2	1594	5832.24	1594	9436.13	1594	6961.84	1594	10158.4	1594	6138.53	1594	15571.4	1594	15247.7
1595	15169.2	1595	7443.59	1595	8936.72	1595	7179.82	1595	9373.52	1595	8417.65	1595	16490.9	1595	15262.9
1596	17880.8	1596	9826.05	1596	8501.04	1596	6451.78	1596	8407.82	1596	7037.68	1596	16139.6	1596	14428.8
1597	19095.7	1597	11246.1	1597	8462.27	1597	5755.7	1597	6423.65	1597	5338.51	1597	17119.6	1597	14776.2
1598	19477.7	1598	12316.7	1598	9403.47	1598	5662.74	1598	5348.19	1598	3269.5	1598	17138.6	1598	14568.7
1599	19386.3	1599	12987.3	1599	8356.9	1599	4745.95	1599	6220.07	1599	4913.03	1599	16947.8	1599	15204.8
1600	18418.9	1600	12668.8	1600	8507.15	1600	5109.66	1600	6593.06	1600	5056.45	1600	16085.6	1600	15340.2
1601	18967.1	1601	12310.2	1601	6610.43	1601	5069.94	1601	8784.76	1601	5560.89	1601	14551.2	1601	14493.4
1602	19285.8	1602	11472.5	1602	5392.11	1602	3537.89	1602	10090.6	1602	6667.91	1602	12515.5	1602	12495.1
1603	21402.3	1603	11660.2	1603	5084.74	1603	3000.73	1603	9880.91	1603	6123.75	1603	10343.7	1603	10242.7
1604	20958.3	1604	10619.8	1604	3847.81	1604	1157.86	1604	10586.2	1604	8157.86	1604	8558.4	1604	8209.2
1605	20758.9	1605	10738.8	1605	5619.16	1605	2251.38	1605	10428.9	1605	8181.37	1605	7458.74	1605	6829.94
1606	20734.6	1606	9433.11	1606	6854.24	1606	2661.35	1606	11585.4	1606	7814.61	1606	6516.88	1606	5922.86
1607	17988.1	1607	8530.89	1607	6110.63	1607	3604.88	1607	13989.7	1607	10841.4	1607	5597.42	1607	5027.92
1608	18815.7	1608	10365.5	1608	7246.94	1608	4319.28	1608	14347.8	1608	12040.8	1608	5065.31	1608	4259.35
1609	19619	1609	12861.6	1609	9488.94	1609	6276.91	1609	11744.3	1609	9505.32	1609	5330.42	1609	4195.44
1610	17166.5	1610	13264.3	1610	11090.5	1610	8591.75	1610	8915.91	1610	5896.58	1610	6092.61	1610	4530.02
1611	18913.8	1611	13875.7	1611	12090.3	1611	8916.19	1611	7000.18	1611	5449.44	1611	6903.29	1611	4305.11
1612	18810.7	1612	14456	1612	12052.9	1612	9012.14	1612	3934.8	1612	3621.11	1612	8452.09	1612	6640.19
1613	18482.6	1613	14036.5	1613	11454.6	1613	7792.94	1613	4947.29	1613	3752.12	1613	10590.6	1613	8286.16
1614	18152.3	1614	13759.3	1614	11231.3	1614	7025.35	1614	3306.06	1614	3528.84	1614	11407.9	1614	8516.77
1615	18295.4	1615	11794.9	1615	11426.2	1615	6543.99	1615	3808.68	1615	4415.19	1615	11796.6	1615	8562.62
1616	21304	1616	14390.6	1616	10262.7	1616	5693.85	1616	4991.05	1616	5454.41	1616	12222.9	1616	8874.22
1617	24117.5	1617	12776.8	1617	7522.51	1617	2928.83	1617	7781.08	1617	7326.74	1617	14788.6	1617	10082.6
1618	25833.8	1618	13361.5	1618	5916.65	1618	2204.95	1618	9058.48	1618	6527.59	1618	14968.1	1618	9979.45
1619	25866.4	1619	13869.8	1619	6235.83	1619	2455.84	1619	9554.85	1619	6219.12	1619	14518.8	1619	9789.72
1620	26586.7	1620	13229.2	1620	6506.89	1620	2921.26	1620	8911.74	1620	5277.11	1620	17430.8	1620	12253.4
1621	22215.7	1621	10810.5	1621	6437.77	1621	3233.92	1621	7804.02	1621	4804.18	1621	15439.7	1621	11688.2
1622	22344.5	1622	10385	1622	7017.88	1622	3924.02	1622	8000.52	1622	8025.94	1622	12534.5	1622	10418.9
1623	20436	1623	9574.23	1623	9323.03	1623	6663.24	1623	7357.14	1623	7342.12	1623	10474.6	1623	8247.55
1624	22740.3	1624	11003.9	1624	11025.5	1624	8490.8	1624	6388.86	1624	6890.09	1624	9839.08	1624	8039.27
1625	21879.6	1625	10611.4	1625	10298.5	1625	8105.58	1625	6689.43	1625	6534.62	1625	10693.5	1625	8266.74
1626	20367.6	1626	9054.77	1626	12127.8	1626	9519.08	1626	6618.96	1626	5263.75	1626	9988.33	1626	7789.9
1627	19298.9	1627	8530.47	1627	11589.2	1627	9028.91	1627	6846.45	1627	4583.67	1627	9572.72	1627	8261.08
1628	19775.4	1628	7902.61	1628	10926.8	1628	8430.11	1628	8448.81	1628	4472.61	1628	10715.3	1628	8553.55
1629	22047.3	1629	9465.65	1629	10208.5	1629	6903.73	1629	9647	1629	5001.81	1629	9685.64	1629	8302.36
1630	23342	1630	11678	1630	11084.3	1630	6704.79	1630	11926.4	1630	6055.95	1630	9249.31	1630	7530.39
1631	23544.2	1631	13800.6	1631	11608.5	1631	7683.18	1631	12192.4	1631	6145.65	1631	10082.8	1631	7864.68
1632	23988.5	1632	14508.7	1632	10340.3	1632	7019.31	1632	13394.2	1632	9278.29	1632	11199.3	1632	7612.91
1633	24536.2	1633	13965.7	1633	10570.3	1633	7693.96	1633	13927.6	1633	9454.84	1633	11323.1	1633	9685.98
1634	22660.7	1634	12566.5	1634	10186	1634	8013.15	1634	12943.8	1634	11037.9	1634	10707.3	1634	8688.52
1635	25736.6	1635	12767.7	1635	10172.8	1635	8047.8	1635	10573	1635	7949.91	1635	10858.4	1635	8517
1636	22542.5	1636	10569.3	1636	10557.3	1636	9078.85	1636	8941.33	1636	7532.77	1636	11187.3	1636	8693.93
1637	19937.4	1637	8478	1637	11473.4	1637	11808.7	1637	7255.13	1637	6247.94	1637	10067.4	1637	7478.41
1638	19109.6	1638	8642.69	1638	12312.9	1638	14166.6	1638	6387.52	1638	6084.16	1638	9368.82	1638	6599.89
1639	18699	1639	9820.38	1639	12299.1	1639	14032.4	1639	5644.13	1639	8311.21	1639	9845.06	1639	6926.25
1640	17169.7	1640	9557.25	1640	11552.7	1640	12584.2	1640	4592.43	1640	6266.32	1640	8686.65	1640	7539.76
1641	16441.6	1641	9175.41	1641	11831.1	1641	14452.7	1641	4836.39	1641	6626.28	1641	10679	1641	7123.75
1642	19886.4	1642	9452.06	1642	10833.3	1642	11516.8	1642	5042.8	1642	9299.54	1642	10090.7	1642	7558.36
1643	24638.6	1643	10109.8	1643	10692.6	1643	12707.5	1643	3933.53	1643	6945.41	1643	9079.84	1643	6425.37
1644	25522.3	1644	11106	1644	11266.9	1644	12408.2	1644	5672.79	1644	7103.42	1644	9467.83	1644	5972.81
1645	27171.1	1645	12477.5	1645	11282.5	1645	11489.5	1645	8232.64	1645	8807.3	1645	11582.1	1645	6477.24
1646	28830.7	1646	13528.2	1646	10886.8	1646	10765.5	1646	8384.25	1646	6527.88	1646	12564.2	1646	7239.94
1647	30950.7	1647	13888.3	1647	9155.99	1647	9705.46	1647	9329.81	1647	8332.44	1647	11871	1647	6673.75
1648	31684.1	1648	14103.1	1648	9236.1	1648	8321.42	1648	8997.49	1648	9784.62	1648	12931.8	1648	7011.62
1649	31951.8	1649	14341.2	1649	10044.5	1649	7343.7	1649	9136.35	1649	8024.07	1649	11448.4	1649	6140.84
1650	32763.7	1650	15105.4	1650	10221.7	1650	6824.17	1650	9779.88	1650	5432.61	1650	12564.5	1650	6551.94
1651	30859.6	1651	13231.1	1651	10080.5	1651	7444.32	1651	10811.3	1651	8245.79	1651	15832.6	1651	7646.71
1652	28689.2	1652	12340.8	1652	9992.48	1652	8461.6	1652	12212.2	1652	8938.72	1652	14095.9	1652	6299.33
1653	28105.6	1653	11928.8	1653	10628.3	1653	9951.43	1653	12774.6	1653	9977.64	1653	15379.8	1653	6978.98
1654	29118	1654	13307.4	1654	9510.83	1654	11775.4	1654	14143	1654	9669.53	1654	15790.7	1654	6563.93
1655	26082.5	1655	12021.6	1655	10798	1655	11595.6	1655	13961.3	1655	11852.4	1655	14231.7	1655	5969.25
1656	24512.9	1656	11961.5	1656	7555.67	1656	9419.05	1656	10423.5	1656	12995.5	1656	12434.4	1656	5676.18
1657	23273.8	1657	10612.8	1657	8794.47	1657	10043	1657	13428	1657	9931.27	1657	13555.2	1657	5938.83
1658	20153.5	1658	8936.29	1658	9012.99	1658	10178.3	1658	10045.5	1658	8732.28	1658	14696	1658	6408.45
1659	21708.2	1659	10573.4	1659	10538.9	1659	11881.3	1659	9478.85	1659	8061.36	1659	15419.8	1659	5839.53
1660	20554.4	1660	10106.6	1660	10940.9	1660	9542.11	1660	9312.19	1660	7222.05	1660	14608.2	1660	5362.84
1661	18786.3	1661	10275.8	1661	10775.5	1661	8587.44	1661	9850.44	1661	5308.25	1661	11871.1	1661	4822.71
1662	17858.6	1662	9954.1	1662	9887.49	1662	10041.2	1662	9394.68	1662	6124.84	1662	13097.6	1662	5557.96
1663	16955.8	1663	9115.6	1663	5546.8	1663	6420.81	1663	10193.2	1663	5911.73	1663	12221.1	1663	5261.33
1664	16499	1664	8595.6	1664	8296.45	1664	8730.48	1664	10737.7	1664	4811.75	1664	9611.09	1664	3466.91
1665	17095	1665	8077.09	1665	8818.33	1665	9303.43	1665	9852.59	1665	4812.25	1665	10251.7	1665	4187.14
1666	18064.9	1666	8059.69	1666	9230.24	1666	9839.64	1666	10571.5	1666	6177.77	1666	12933.5	1666	6773.46
1667	17071.6	1667	6895.92	1667	10360.1	1667	10423.8	1667	12293	1667	7925.15	1667	17064.7	1667	9275.05
1668	14075.6	1668	5903.45	1668	11413.8	1668	10887.9	1668	12812	1668	8557.14	1668	20239.7	1668	11461.6
1669	13884.6	1669	7108.09	1669	12970.4	1669	12244.1	1669	11939	1669	9346.71	1669	18743	1669	9720.13
1670	14642.3	1670	6531.83	1670	13034	1670	10989	1670	11672.7	1670	9302.88	1670	16577	1670	7878.68
1671	14053.7	1671	5688.23	1671	9900.44	1671	11276.3	1671	12037.4	1671	8736.15	1671	19182.5	1671	9732.07
1672	13016.4	1672	5076.83	1672	11604.6	1672	11592.8	1672	10148.4	1672	6946.21	1672	21161.4	1672	12237.7
1673	19103.3	1673	7329.11	1673	11885.8	1673	12269.2	1673	12108.1	1673	7965.13	1673	18607.1	1673	9849.52
1674	17222.4	1674	6790.35	1674	12111.9	1674	11387.7	1674	12020.4	1674	8505.72	1674	16455.5	1674	9529.74
1675	26373.3	1675	12182.7	1675	12652.8	1675	11899.9	1675	13380.9	1675	8703.29	1675	19710	1675	11339
1676	23505.1	1676	11189.8	1676	13238.2	1676	12385	1676	16286.9	1676	12051.6	1676	18905.5	1676	10634.5
1677	22808.1	1677	11687	1677	12902.5	1677	11885.5	1677	17507	1677	12511.5	1677	18265	1677	10384.1
1678	22033.4	1678	12282.1	1678	11336.7	1678	10835.5	1678	17288.1	1678	11721.6	1678	17246.4	1678	9411.36
1679	22384.4	1679	13090.7	1679	10393	1679	10653.1	1679	15833.1	1679	10123	1679	16846	1679	10710
1680	20543.3	1680	11398.5	1680	8648.41	1680	9252.7	1680	14728.4	1680	9048.58	1680	15646.3	1680	8153.3
1681	19188.1	1681	9564.31	1681	7986.7	1681	8142.45	1681	14002.2	1681	8750.71	1681	15854.4	1681	8364.44
1682	19882.9	1682	9839.91	1682	7075.53	1682	7159.12	1682	11498.3	1682	6735.06	1682	17017.1	1682	9552.75
1683	20309.7	1683	9852.23	1683	8204.43	1683	8352.24	1683	11761.2	1683	6626.34	1683	17313.6	1683	9274.77
1684	20553.5	1684	9929.99	1684	7576.06	1684	8232.32	1684	11075.4	1684	6635.1	1684	19464.9	1684	9937.06
1685	20364.7	1685	9130.84	1685	7570.19	1685	7711.48	1685	11423.5	1685	7370.21	1685	20101.4	1685	10947.4
1686	22619.3	1686	11944.3	1686	7414.17	1686	8480.31	1686	10897.4	1686	6630.5	1686	20289.8	1686	11208
1687	23218.6	1687	10748.9	1687	7412.41	1687	7777.84	1687	12639.2	1687	7998.04	1687	21664.1	1687	11371.3
1688	25148	1688	13198.3	1688	6772.53	1688	7529.06	1688	13414.6	1688	6935.69	1688	21581.4	1688	10226.5
1689	25214.5	1689	12313.8	1689	7095.72	1689	7004.68	1689	14214.2	1689	10213.7	1689	18375	1689	8173.66
1690	27464.8	1690	13462.7	1690	6807.22	1690	7090.89	1690	14956	1690	9599.77	1690	15240.4	1690	7278.13
1691	30512.2	1691	15524.9	1691	6284.1	1691	5822.53	1691	16598.4	1691	11118.9	1691	13111	1691	6171.86
1692	33583.4	1692	16842.7	1692	6077.67	1692	5410.17	1692	16254.8	1692	12117.3	1692	15380.6	1692	7606.16
1693	34392.6	1693	17546.4	1693	7092.96	1693	6787.78	1693	16063	1693	12153.1	1693	13123.4	1693	5729.26
1694	39356.1	1694	19566.8	1694	6643.82	1694	6307.15	1694	16112.6	1694	12871.6	1694	13691.4	1694	6726.47
1695	38895.3	1695	18774.3	1695	6770.62	1695	5268.06	1695	16514.4	1695	12920.7	1695	12492.9	1695	6634.34
1696	41471.7	1696	21739	1696	7016.99	1696	6002.8	1696	18285.6	1696	13296.5	1696	12503.6	1696	6666.6
1697	40652.6	1697	22912.6	1697	7450.77	1697	6296.57	1697	18137.6	1697	10982	1697	12742.9	1697	7076.97
1698	40128.1	1698	23383.7	1698	6163.59	1698	4433.23	1698	18169.7	1698	11511.5	1698	14547.4	1698	9169.93
1699	40649.3	1699	25610.5	1699	6499.47	1699	5504.9	1699	19859.9	1699	13363.8	1699	16883	1699	11023.5
1700	38887.6	1700	26456.2	1700	6912.14	1700	5360.81	1700	19933.3	1700	16009.4	1700	17797.9	1700	10095.1
1701	37590.4	1701	26139.8	1701	6135.46	1701	4611.8	1701	19660.1	1701	14012.5	1701	16184.4	1701	8590.16
1702	38499	1702	27052.2	1702	6774.28	1702	5789.38	1702	18622.4	1702	12219.3	1702	14325.1	1702	7755.89
1703	39232.7	1703	27545.6	1703	7980.11	1703	6530.06	1703	17610.4	1703	12742.8	1703	13227	1703	7143.76
1704	40746	1704	27785.2	1704	6968.65	1704	6986.53	1704	19546.6	1704	14281	1704	12941.9	1704	7000.44
1705	41684.1	1705	28676.1	1705	7364.34	1705	7883.28	1705	17191.6	1705	14668.2	1705	14892.3	1705	8524.68
1706	43054.6	1706	29218.8	1706	7745.59	1706	9267.8	1706	16328.7	1706	13168.6	1706	13972.2	1706	7608.59
1707	43406.1	1707	30359.6	1707	9051.49	1707	10947.7	1707	15858.5	1707	12574.1	1707	14141.2	1707	7405.05
1708	43525.1	1708	30250.6	1708	11747.1	1708	11959.4	1708	15556.7	1708	12265.9	1708	13745.1	1708	7301.44
1709	41790.8	1709	29143	1709	10466.5	1709	11734.5	1709	15049.2	1709	11023	1709	13198.2	1709	6687.8
1710	41891	1710	28857.9	1710	13374.9	1710	14477	1710	14492.2	1710	11346.4	1710	13495.5	1710	6998.76
1711	43640.1	1711	29098.3	1711	13010.4	1711	13106.5	1711	12985.1	1711	11102.8	1711	14436.5	1711	7817.07
1712	44687.4	1712	30329.8	1712	16092.2	1712	16472.8	1712	12112.7	1712	10563.8	1712	14405.5	1712	7631.23
1713	45492.7	1713	31051.7	1713	19352.7	1713	18497.8	1713	11448.1	1713	9108.58	1713	14019.3	1713	7653.76
1714	45707.5	1714	31740.4	1714	18215	1714	17498.7	1714	11942.6	1714	9070.58	1714	13605	1714	8716.2
1715	45526.6	1715	30490.7	1715	17262.8	1715	17655.9	1715	13428.8	1715	9326.22	1715	12643.2	1715	8895.66
1716	45709.7	1716	29382.7	1716	16946.3	1716	17549.5	1716	14123.6	1716	9964.08	1716	12710.7	1716	8798.21
1717	46233.5	1717	28330.9	1717	16242.9	1717	16134.4	1717	12989.1	1717	10573.7	1717	11531.6	1717	7183.59
1718	46514.4	1718	27737.8	1718	15151.2	1718	14246.4	1718	11153.4	1718	9093.22	1718	10236.5	1718	6198.81
1719	46258.1	1719	28438.5	1719	13459.4	1719	12519.3	1719	10087	1719	8758.85	1719	9649.5	1719	5818.88
1720	47122.4	1720	29196.7	1720	13119	1720	11870.1	1720	11989.9	1720	11349.3	1720	9308.62	1720	5184.71
1721	36844.6	1721	16090.9	1721	12379.6	1721	8741.02	1721	10867.5	1721	10130.5	1721	9420.34	1721	5092.47
1722	25437.1	1722	9901.98	1722	12112.9	1722	8509.17	1722	10376.7	1722	9446.84	1722	11961.9	1722	6188.45
1723	19470.9	1723	7308.62	1723	10213.9	1723	7218.29	1723	9480.75	1723	8385.73	1723	14387.5	1723	8798.71
1724	16061.2	1724	6097.83	1724	10880.3	1724	7532.74	1724	9615.43	1724	7827.92	1724	14527.5	1724	9381.88
1725	16594.3	1725	7076.18	1725	8242.75	1725	6141.28	1725	9806.13	1725	7391.32	1725	14343.5	1725	9448.37
1726	13390.2	1726	6399.57	1726	7852.16	1726	6643.1	1726	8859.34	1726	6689.64	1726	14476.5	1726	10445.6
1727	13145.3	1727	7077.73	1727	8799.3	1727	7765.55	1727	7355.63	1727	4755.63	1727	13231.8	1727	10442.1
1728	14138.8	1728	7833.88	1728	8299.23	1728	7099.24	1728	7586.46	1728	4933.3	1728	14901.5	1728	11157.7
1729	13916.8	1729	6696.18	1729	7947.03	1729	6516.78	1729	7776.94	1729	5725.73	1729	14331.4	1729	10827.1
1730	10279.1	1730	3900.16	1730	7758.69	1730	5809.67	1730	7820.16	1730	6439.94	1730	16409.9	1730	11320
1731	7804.82	1731	3427.47	1731	7264.58	1731	6731.39	1731	7410.89	1731	6185.9	1731	15907.8	1731	9935.82
1732	11403.1	1732	5074.17	1732	6590.61	1732	6124.2	1732	7394.27	1732	5213.56	1732	15666.3	1732	9220.4
1733	13947.3	1733	5874.68	1733	6676.38	1733	6147.34	1733	6260.86	1733	3899.51	1733	16141.4	1733	9016.78
1734	16630.4	1734	6540.48	1734	6454.71	1734	6086.86	1734	6129.87	1734	3753.68	1734	17654.5	1734	9335.05
1735	19303	1735	7235.91	1735	6186.14	1735	5909.95	1735	6312.17	1735	2705.35	1735	19232.5	1735	9895.11
1736	20186.3	1736	7747.99	1736	7101.73	1736	6918.62	1736	7188.59	1736	4379.64	1736	19063.3	1736	9962.99
1737	17194.6	1737	5363.5	1737	8554.52	1737	7932.43	1737	7019.6	1737	5844.64	1737	19320.4	1737	9191.62
1738	16993.4	1738	7235.03	1738	8155.83	1738	7198.5	1738	6219.87	1738	6916.21	1738	16455.8	1738	6154.77
1739	16201.6	1739	6656.5	1739	8731.12	1739	7462.47	1739	6369.4	1739	5181.36	1739	13315.7	1739	4437.94
1740	15374.9	1740	6857.81	1740	8479.8	1740	8739.84	1740	6650.18	1740	7236.43	1740	10129.9	1740	3555.12
1741	16548.4	1741	8072.75	1741	7129.77	1741	7119.6	1741	7034.32	1741	6345.95	1741	9707.91	1741	4851.79
1742	18418.6	1742	8221.05	1742	7995.26	1742	8211.3	1742	6489.75	1742	4502.43	1742	10462.2	1742	5905.72
1743	19446.2	1743	7356.07	1743	6213.11	1743	7617.16	1743	6560.58	1743	4407.86	1743	9441.02	1743	7357.48
1744	24062.3	1744	11392.2	1744	6564.58	1744	8027.43	1744	7119.04	1744	5483.6	1744	9394.27	1744	7837.21
1745	22547.2	1745	9940.25	1745	7165.87	1745	7724.75	1745	6550.96	1745	4022.25	1745	9268.7	1745	8370.37
1746	21409.6	1746	11300.3	1746	7860.19	1746	6664.39	1746	6993.14	1746	4165.94	1746	9883.52	1746	8306.71
1747	22904.4	1747	11748.4	1747	7550.28	1747	5420.38	1747	7584.78	1747	5261.38	1747	9340.05	1747	7333.79
1748	24976.6	1748	13819.6	1748	7607.05	1748	4775.73	1748	8191.82	1748	5059.33	1748	8745.44	1748	7084.48
1749	25172.5	1749	13044.4	1749	6167.54	1749	2601.1	1749	8339.4	1749	6120.51	1749	8676.51	1749	6722.03
1750	23058.5	1750	12043.6	1750	7307.92	1750	3559.82	1750	8428.19	1750	5686.92	1750	9283.84	1750	7054.87
1751	19897.3	1751	9961.59	1751	8392.52	1751	3757.27	1751	8526.23	1751	7063.06	1751	9398.99	1751	7333.85
1752	17372.7	1752	8985.68	1752	7506.92	1752	4969.63	1752	8710.01	1752	7094.73	1752	10472.5	1752	8862.75
1753	15891.7	1753	7921.5	1753	7208.12	1753	4316.48	1753	8574.3	1753	7760.71	1753	12173.7	1753	10951.1
1754	15614.9	1754	7801.05	1754	5907.19	1754	4315.55	1754	8310.39	1754	7789.4	1754	12893.7	1754	12229.3
1755	16716	1755	8367.42	1755	5086.4	1755	4790.32	1755	7796.78	1755	8332.07	1755	13434.6	1755	12656.7
1756	17746.6	1756	8342.95	1756	5805.18	1756	5005.12	1756	7310.79	1756	7850.76	1756	14178.5	1756	13206.2
1757	17475.6	1757	8756.6	1757	5648.62	1757	4979.3	1757	7405.39	1757	7044.7	1757	14324.2	1757	13031.1
1758	14541.6	1758	6174.61	1758	7215.53	1758	5944.69	1758	7602.53	1758	7697.53	1758	16090.1	1758	13651
1759	11858.8	1759	5112.82	1759	8411.68	1759	5792.3	1759	7660.35	1759	5938.98	1759	17096.7	1759	11205.6
1760	7674.91	1760	3300.36	1760	7872.98	1760	5162.94	1760	7647.1	1760	6117.01	1760	15794.2	1760	9440.26
1761	4789.26	1761	2981.64	1761	9985.92	1761	6798.41	1761	7197.14	1761	6833.62	1761	13907.3	1761	8766.66
1762	4819.51	1762	3673.26	1762	9983.28	1762	6561.79	1762	7544.84	1762	5528.43	1762	11530.3	1762	7751.34
1763	6755.85	1763	3785.36	1763	8943.36	1763	6240.14	1763	8073.76	1763	4838.29	1763	9665.13	1763	7379.91
1764	9093.75	1764	5106.89	1764	8724.47	1764	6194.36	1764	8093.43	1764	4833.67	1764	8612.81	1764	6923.76
1765	11090.2	1765	6509.37	1765	10175.2	1765	6605.28	1765	7004.56	1765	4712.32	1765	8182.41	1765	7247.54
1766	12242.4	1766	7517.26	1766	10124.1	1766	6676.2	1766	6276.55	1766	4505.35	1766	7277.93	1766	6190.06
1767	12543.8	1767	7221.87	1767	10533	1767	5893.63	1767	6650.59	1767	6063.93	1767	6257.68	1767	5390.83
1768	13798.6	1768	7818.38	1768	10365.3	1768	5851.71	1768	6782.34	1768	6871.17	1768	5856.14	1768	4173.68
1769	16013.8	1769	7978.15	1769	9258.56	1769	6591.67	1769	6110.66	1769	6919.58	1769	5524.35	1769	3260.08
1770	18220.2	1770	8901.64	1770	9164.83	1770	6505.37	1770	5924.67	1770	6385.41	1770	5776.77	1770	4810.42
1771	17694.6	1771	8865.72	1771	10838.7	1771	8299.73	1771	6623.38	1771	6402.78	1771	8264.74	1771	6574.74
1772	18812.1	1772	9643.14	1772	10534.4	1772	8817.43	1772	7322.94	1772	6560.78	1772	9695.98	1772	8155.67
1773	21170.1	1773	10818.4	1773	13446.9	1773	10784.7	1773	7204.85	1773	6424.31	1773	11583.9	1773	7861.05
1774	19699.3	1774	11160.2	1774	11763.4	1774	10495	1774	6433.09	1774	6304.54	1774	12564.5	1774	7529.56
1775	16925.5	1775	9003.55	1775	11100.1	1775	9155.96	1775	7761.08	1775	7686.1	1775	12734.9	1775	6896.11
1776	20366.8	1776	9253.1	1776	10836.4	1776	9198.57	1776	8099.8	1776	6903.11	1776	13877.2	1776	7522.64
1777	21091.2	1777	9120.62	1777	9904.37	1777	7867.63	1777	8918.68	1777	6229.65	1777	15031.9	1777	8721.72
1778	20445.1	1778	8583.61	1778	9617.13	1778	6382.16	1778	10650	1778	5225.84	1778	15155.5	1778	5441
1779	18964.5	1779	9230.24	1779	10300.2	1779	6103.17	1779	11189.2	1779	4873.49	1779	13332.4	1779	5374.27
1780	20943.7	1780	11293.6	1780	9060.51	1780	5132.53	1780	11875.8	1780	6064.3	1780	12312.1	1780	5641.08
1781	24630.6	1781	11420.3	1781	7593.98	1781	5420.85	1781	12257.3	1781	6536.26	1781	12812.2	1781	6508.06
1782	21610.5	1782	9217.98	1782	8413.68	1782	5006.18	1782	10947.3	1782	5008.75	1782	13351	1782	6874.02
1783	15827.9	1783	7345.71	1783	9737	1783	5875.65	1783	9674.32	1783	5186.19	1783	13026.5	1783	7466.39
1784	12329.2	1784	6235.35	1784	8700.8	1784	5878.4	1784	10132.4	1784	5953.37	1784	14735.7	1784	8179.08
1785	11052.8	1785	4973.3	1785	7475.92	1785	5032.79	1785	11917.5	1785	6891.73	1785	15707.7	1785	8874.77
1786	10856	1786	4846.36	1786	8851.15	1786	7111.19	1786	9973.6	1786	5071.85	1786	14980.2	1786	8418.1
1787	12478.8	1787	5492.46	1787	9848.02	1787	8381.76	1787	11293.3	1787	5402.62	1787	13758.6	1787	8673.28
1788	11742.9	1788	4827.26	1788	9250.49	1788	7640.69	1788	12165.6	1788	6427.84	1788	14995.3	1788	9863.82
1789	13094.9	1789	5944.76	1789	8928.81	1789	5765.54	1789	11694.1	1789	5754.11	1789	15913.5	1789	10792.5
1790	11054	1790	4825.09	1790	8276.08	1790	5303.45	1790	11099.2	1790	4990.09	1790	15575.9	1790	11510.3
1791	14838.5	1791	6690.12	1791	9672.85	1791	6636.15	1791	10172.4	1791	5385.17	1791	17027.5	1791	12113.3
1792	12523.4	1792	5971.7	1792	8262.93	1792	6771.01	1792	10053.5	1792	7433.7	1792	14370.6	1792	9094.53
1793	10959.5	1793	5164.93	1793	8301.15	1793	7029.68	1793	9629.58	1793	7420.77	1793	15354.1	1793	9780.3
1794	9510.25	1794	4871.72	1794	7511.44	1794	5949.63	1794	11647.9	1794	8357.89	1794	15715.3	1794	9550.23
1795	11736.6	1795	5685.65	1795	6773.06	1795	5775.58	1795	11319.2	1795	8932.69	1795	16568.5	1795	9900.88
1796	14980	1796	6266.3	1796	6864.41	1796	3543.99	1796	10506.2	1796	8574.23	1796	17383.3	1796	10504.4
1797	15171.3	1797	6579.03	1797	8150.38	1797	4169.41	1797	9541.22	1797	8879.23	1797	16934.9	1797	11750.7
1798	16243.6	1798	7074.93	1798	8264.61	1798	5223.38	1798	8716.23	1798	7333.37	1798	15316.3	1798	11755.5
1799	17642.1	1799	8594.83	1799	8077.46	1799	4298.05	1799	9795.04	1799	8318.2	1799	14030.7	1799	10121.3
1800	17527.7	1800	8084.05	1800	6958.19	1800	4783.91	1800	10211.2	1800	9139.82	1800	13887.8	1800	9489.44
1801	15931.9	1801	6441.4	1801	9320.61	1801	5089.22	1801	10037.1	1801	9659.7	1801	15225.3	1801	9876.93
1802	18301.4	1802	8873.63	1802	8333.52	1802	5372.26	1802	9548.39	1802	8645.41	1802	14498.8	1802	9521.5
1803	20421	1803	9812.03	1803	9926.8	1803	7453.93	1803	9422.81	1803	8135.77	1803	14698.7	1803	10088.5
1804	18562.9	1804	9816	1804	10832.6	1804	8187.37	1804	9428.38	1804	8606.36	1804	14413.2	1804	9406.34
1805	20107.3	1805	10177	1805	10685.4	1805	8320.53	1805	6680.41	1805	5290.83	1805	15981.5	1805	9587.36
1806	20153.7	1806	9786.86	1806	9340.25	1806	9406.14	1806	7048.03	1806	5976.01	1806	16568.4	1806	12507.6
1807	19153.5	1807	8951.94	1807	7300.01	1807	8871.53	1807	5285.15	1807	4367.4	1807	16161.6	1807	12479.1
1808	17580.6	1808	8264.29	1808	6861.86	1808	9021.4	1808	5059.87	1808	4716.08	1808	14911.8	1808	8853.82
1809	16583.9	1809	8905.7	1809	7978.77	1809	9769.09	1809	6557.47	1809	3856.76	1809	13978	1809	10854.3
1810	17530.6	1810	9460.65	1810	5977.74	1810	7329.82	1810	6816.63	1810	4158.81	1810	12038.3	1810	8579.6
1811	17185.7	1811	9064.41	1811	4980.64	1811	5637.7	1811	8620.59	1811	5595.38	1811	14294.4	1811	11234.1
1812	16081.1	1812	8183.45	1812	6011.77	1812	7180.62	1812	9090.12	1812	5915.13	1812	14295.9	1812	11514.3
1813	14735.6	1813	7280.71	1813	8092.77	1813	8793.99	1813	9681.81	1813	6700.9	1813	13204.9	1813	9938.47
1814	13965.5	1814	6874.43	1814	11002.9	1814	11804.3	1814	10888.9	1814	10151.9	1814	13843.4	1814	10585.9
1815	16589.9	1815	7240.17	1815	13654.1	1815	11542.5	1815	12168.7	1815	10456.9	1815	13862.7	1815	9780.16
1816	17264.2	1816	8350.53	1816	12834.2	1816	8180.4	1816	13160	1816	12290.8	1816	10717.8	1816	8136
1817	19484.3	1817	10688.7	1817	11599.2	1817	6936.64	1817	12649.4	1817	10662.8	1817	10753.9	1817	8203.31
1818	20094.7	1818	10898.4	1818	11291.7	1818	8732.14	1818	11760.5	1818	10005.9	1818	11360.5	1818	8165.89
1819	21574.2	1819	12981.7	1819	13054.6	1819	11089.5	1819	11949.9	1819	9415.9	1819	12375.2	1819	8185.09
1820	22698.3	1820	13747.4	1820	11992.8	1820	10919.4	1820	12883.7	1820	10666.4	1820	13230.3	1820	8633.89
1821	25194.2	1821	14081.9	1821	12894.3	1821	14280.1	1821	14438.9	1821	12808.4	1821	15203.3	1821	11401.3
1822	27946.9	1822	14607.5	1822	12304.9	1822	15056.2	1822	14476.2	1822	11940.6	1822	16721.8	1822	13161.1
1823	26545.5	1823	14516.4	1823	12881.5	1823	12496.4	1823	13422.8	1823	9452.91	1823	15713	1823	12145
1824	26461.9	1824	15275.5	1824	13810.1	1824	10208.3	1824	11489.1	1824	6064.91	1824	14411.6	1824	9146.57
1825	26086.4	1825	14837.4	1825	13266.5	1825	10110.2	1825	9887.52	1825	6069.15	1825	18863.2	1825	10277
1826	25089.2	1826	13204.7	1826	12619.9	1826	10173.8	1826	7075.77	1826	5360.05	1826	25173.8	1826	15562.1
1827	24071.5	1827	12004.9	1827	12012.3	1827	10330.5	1827	8371.26	1827	5625.07	1827	23633.2	1827	14894.3
1828	23956.6	1828	10770.6	1828	9610.97	1828	10151.1	1828	7453.79	1828	5440.37	1828	24409.3	1828	15201.8
1829	25073.2	1829	11758.7	1829	9584.12	1829	9822	1829	8019.53	1829	7063.28	1829	20429	1829	17145
1830	25880	1830	12201.5	1830	9076.24	1830	9217.52	1830	8888.04	1830	8258.91	1830	15661.4	1830	12350.6
1831	27417.3	1831	12199.6	1831	7338.91	1831	7235.98	1831	9192.9	1831	7231.59	1831	15564.6	1831	10757.3
1832	25908.3	1832	11635.7	1832	7656.03	1832	6963.06	1832	9175.65	1832	7424.22	1832	16331.8	1832	11133.7
1833	22463.2	1833	10653.2	1833	6338.05	1833	5827.85	1833	10355	1833	8586.74	1833	15362.1	1833	10535.2
1834	20380.8	1834	8175.32	1834	7932.19	1834	6602.47	1834	11094.6	1834	8730.98	1834	16423	1834	11236.8
1835	20574.8	1835	8030.75	1835	6483.19	1835	5722.84	1835	11702.6	1835	6855.22	1835	16215.5	1835	10479.4
1836	19925.7	1836	7844.34	1836	6550.53	1836	4768.21	1836	10288.7	1836	4209.54	1836	16105.9	1836	9909.85
1837	19397	1837	7665.51	1837	5401.32	1837	2940.8	1837	11999	1837	6201.38	1837	16086.1	1837	9291.94
1838	18304.9	1838	8011.66	1838	5538.04	1838	2749.93	1838	12737	1838	7440.71	1838	14822.6	1838	8854.42
1839	18255.8	1839	6333.73	1839	5339.34	1839	2997.59	1839	9764.92	1839	5024.1	1839	15724.1	1839	8887.93
1840	18046.6	1840	6163.2	1840	9169.97	1840	5715.19	1840	7275.07	1840	3287.91	1840	14961	1840	9547.71
1841	18400.3	1841	6130.15	1841	7438.44	1841	4108.06	1841	7615.54	1841	4346.8	1841	14901.2	1841	9718.35
1842	17967.5	1842	6193.1	1842	8874.99	1842	5737.98	1842	6566.06	1842	3242.43	1842	14630.9	1842	10287.1
1843	16513.9	1843	5786.93	1843	8957.14	1843	5392.78	1843	6753.25	1843	3253.07	1843	14519.2	1843	10867.5
1844	15724.2	1844	5429.18	1844	10519.9	1844	5252.31	1844	7225.82	1844	3907.46	1844	14335.9	1844	11594.4
1845	16645.6	1845	6371.39	1845	9630.15	1845	5022.28	1845	7678.32	1845	4715.42	1845	14118.6	1845	11930
1846	18168.4	1846	7341.67	1846	9968.4	1846	5603.56	1846	10921.4	1846	6695.74	1846	16532.1	1846	11878.2
1847	19651.5	1847	7657.75	1847	9235.82	1847	5088.29	1847	10626.4	1847	6651.99	1847	13825.7	1847	11282.2
1848	23153.2	1848	7932.21	1848	10940.8	1848	5589.88	1848	14553.8	1848	9218.9	1848	15742.7	1848	9406.44
1849	24680.6	1849	8370.71	1849	10519.9	1849	5294.24	1849	13233.6	1849	6257.35	1849	16529.2	1849	9078.42
1850	25307.1	1850	8077.19	1850	8663.27	1850	4660.57	1850	11497.6	1850	5129.11	1850	14885.1	1850	8001.99
1851	21787	1851	6382.23	1851	8506.52	1851	5715.47	1851	10192	1851	5543.88	1851	13812.4	1851	6892.87
1852	23777.8	1852	6683.2	1852	8543.71	1852	5836.28	1852	7881.42	1852	3889.73	1852	13963.6	1852	7204.82
1853	25607.8	1853	7349.79	1853	7935.66	1853	5315.13	1853	6917.38	1853	3739.4	1853	14806.6	1853	7588.24
1854	26903.5	1854	7392.22	1854	7471.58	1854	4118.32	1854	8341.79	1854	3565.33	1854	14792.2	1854	7779.36
1855	25879.6	1855	8768.16	1855	7293.31	1855	4778.69	1855	9672.65	1855	4844.72	1855	16581.1	1855	8923.43
1856	24278.6	1856	9394.99	1856	7001.46	1856	4050.59	1856	10576.5	1856	6028.68	1856	15634.5	1856	8956.75
1857	20259.8	1857	7817.08	1857	6904.78	1857	4393.88	1857	11404.2	1857	6733.16	1857	14634.2	1857	9350.45
1858	16202.2	1858	5724.45	1858	6678.19	1858	4223.72	1858	12091.3	1858	6399.74	1858	15890.7	1858	9514.27
1859	14462.2	1859	4984.81	1859	6409.66	1859	4235.29	1859	13248.2	1859	8248.64	1859	14787.5	1859	9312.83
1860	12230.2	1860	4602.46	1860	6760.96	1860	4190.51	1860	12730.4	1860	8513.25	1860	15382.4	1860	9620.25
1861	13711.9	1861	4840.73	1861	6741.02	1861	4103.14	1861	12805.8	1861	9280.69	1861	16419.5	1861	10137.3
1862	15403.5	1862	5244.08	1862	8124.02	1862	5357.87	1862	13416.4	1862	10496.9	1862	15413.3	1862	9969.16
1863	15388.8	1863	5832.35	1863	8923.85	1863	6620.48	1863	12721.5	1863	6773.99	1863	14538.2	1863	10442.1
1864	15809.8	1864	5722.79	1864	9380.54	1864	7185.89	1864	11473.2	1864	6310.65	1864	15483.6	1864	10835
1865	13953.5	1865	6881.89	1865	9807.38	1865	7631.81	1865	11068.2	1865	6311.44	1865	15126.9	1865	10002.5
1866	12477.1	1866	4689.65	1866	10541.9	1866	6852.96	1866	10488.7	1866	5677.07	1866	15350.2	1866	9620.58
1867	13626.1	1867	4580.49	1867	10319.3	1867	6137.1	1867	10846.7	1867	5338.53	1867	15219.6	1867	9640.68
1868	14645	1868	3866.46	1868	10692.8	1868	7762.44	1868	11073.4	1868	4190.82	1868	16188.7	1868	9544.16
1869	14932.4	1869	4575.72	1869	9855.29	1869	8400.67	1869	10583.6	1869	4654.6	1869	17012.8	1869	9893.65
1870	15517.3	1870	3261.32	1870	12676.9	1870	11593.5	1870	11318.3	1870	4499.61	1870	17802.5	1870	10565.7
1871	17873.4	1871	4333.25	1871	12043	1871	8177.6	1871	10691.6	1871	4077.55	1871	19703.8	1871	12546.9
1872	19922.3	1872	4896.91	1872	11756	1872	7050.31	1872	11151.2	1872	5266.49	1872	19295.8	1872	11457.2
1873	20085.7	1873	5352.88	1873	10629.4	1873	6982.17	1873	9685.35	1873	6219.75	1873	19908.4	1873	12161.6
1874	21703	1874	5674.71	1874	9373.7	1874	6652.94	1874	7701.95	1874	5735.69	1874	19957.8	1874	12700.9
1875	20631.4	1875	6452.23	1875	8404.07	1875	5478.59	1875	7067.01	1875	4381.35	1875	20196.1	1875	12700.8
1876	18928.8	1876	6151.69	1876	8057.12	1876	5807.27	1876	7677.32	1876	4707.89	1876	21969.9	1876	14826.9
1877	17154.1	1877	5444.66	1877	8939.15	1877	6306.9	1877	8351.29	1877	5773.71	1877	21400.6	1877	14447.3
1878	17252.7	1878	5135.79	1878	8932.16	1878	4944.98	1878	10599.5	1878	9603.53	1878	22837.6	1878	15854.1
1879	18718.7	1879	6093.78	1879	8551.73	1879	4584.47	1879	10722	1879	10616.6	1879	19783.2	1879	13506.5
1880	18635.6	1880	5992.7	1880	8224.17	1880	5519.99	1880	10446.6	1880	8863.49	1880	17679.8	1880	11512.8
1881	14806.1	1881	5294.75	1881	6065.77	1881	4896.29	1881	11440.6	1881	10022.8	1881	18373.3	1881	11495
1882	11433.4	1882	4449.62	1882	5950.98	1882	4631.13	1882	11916.6	1882	9184.85	1882	17932.5	1882	11395.5
1883	10773.8	1883	3756.59	1883	5803.61	1883	4443.69	1883	11454.3	1883	8577.17	1883	17088	1883	10657.7
1884	11348	1884	3968.54	1884	5730.4	1884	4734.44	1884	12002.4	1884	10132.3	1884	18745.9	1884	12717.9
1885	12753.1	1885	4955.46	1885	5738.66	1885	4617.85	1885	11087	1885	9793.8	1885	18381.2	1885	13609.7
1886	10560.8	1886	4010.26	1886	5747.39	1886	4963.44	1886	12649.8	1886	8836.16	1886	16879.3	1886	13362.4
1887	9997.34	1887	3835.15	1887	6086.47	1887	4663.35	1887	12647.9	1887	8847.77	1887	16185.7	1887	12263.9
1888	11205.9	1888	4654.74	1888	6078.1	1888	5389.57	1888	12878	1888	9637.39	1888	17139.8	1888	12117.7
1889	13509	1889	5775.6	1889	6111.82	1889	5795.92	1889	12042.8	1889	8698.74	1889	17690.3	1889	12067.6
1890	16618.2	1890	7029.73	1890	6375.84	1890	5943.64	1890	11262.4	1890	7887.9	1890	19832.4	1890	13096.7
1891	19990.4	1891	7850.33	1891	6551.72	1891	6086.3	1891	9034.71	1891	6937.99	1891	19824.8	1891	13966
1892	21306.4	1892	7906.58	1892	7786.68	1892	5447.99	1892	8116.98	1892	7017.45	1892	18367.1	1892	12525.5
1893	21927	1893	8355.27	1893	8098.82	1893	5202.04	1893	9773.83	1893	8844.56	1893	21182.6	1893	13561.1
1894	21588.8	1894	9751.59	1894	8749.5	1894	5761.91	1894	10896.5	1894	8910.26	1894	20457.5	1894	12627
1895	19144	1895	7565.05	1895	8803.89	1895	6314.29	1895	12049.4	1895	8135.02	1895	18765.8	1895	10627.4
1896	20477.9	1896	7090.2	1896	8545.11	1896	6471.14	1896	12746.4	1896	9311.34	1896	22418.8	1896	13198.8
1897	20202.7	1897	6889.27	1897	7814.08	1897	6795.72	1897	14404.4	1897	10178.7	1897	24544.2	1897	14353.5
1898	24958.7	1898	8570.55	1898	7942.71	1898	6335.02	1898	14790.1	1898	10162.5	1898	23870.7	1898	13626.2
1899	22993.6	1899	8840.4	1899	8483.52	1899	6251.31	1899	14601.4	1899	9708.43	1899	23541	1899	13151.8
1900	24089.9	1900	9264.83	1900	10233.1	1900	6269.6	1900	13821.7	1900	8884.97	1900	21842.9	1900	12533.9
1901	23490.8	1901	7570.38	1901	6915.16	1901	4946.03	1901	14231.8	1901	9938.87	1901	21738.3	1901	12820.8
1902	19050.2	1902	5986	1902	5981.24	1902	5462.31	1902	13149.4	1902	8845.71	1902	21287.4	1902	11939.7
1903	15079.9	1903	4464.27	1903	6524.94	1903	5954.37	1903	10456.4	1903	5963.94	1903	21692.3	1903	11739.2
1904	12348.3	1904	4478.08	1904	6062.37	1904	5451.57	1904	9940.29	1904	7355.98	1904	22212.3	1904	12163.2
1905	11171.4	1905	5516.4	1905	6335.78	1905	6139.9	1905	8933.15	1905	6656.97	1905	22705.2	1905	12485.1
1906	11885.5	1906	4107.01	1906	7688.14	1906	5394.73	1906	8832.84	1906	5934.64	1906	22969.7	1906	12737.2
1907	10465.9	1907	3768.16	1907	8977.34	1907	4772.34	1907	10301.5	1907	7092.99	1907	22696.9	1907	13163.1
1908	9146.56	1908	3106.65	1908	8341.13	1908	5405.77	1908	10155.6	1908	7039.05	1908	22631	1908	13256.8
1909	7930.48	1909	2487.88	1909	7783.26	1909	6038.68	1909	9870.21	1909	7530.68	1909	20422	1909	12811.3
1910	7655.55	1910	3103.23	1910	7596.66	1910	7892.95	1910	10455.8	1910	8480.36	1910	18399.2	1910	11890.1
1911	8452.68	1911	3804.54	1911	7059.4	1911	7658.38	1911	10724.7	1911	9435.28	1911	17518.1	1911	11615.5
1912	13949.8	1912	6950.08	1912	6398.86	1912	6725.12	1912	11796.6	1912	10467.4	1912	15500.5	1912	9225.42
1913	12105.8	1913	6318.29	1913	6742.37	1913	6651.35	1913	12263.2	1913	8736.83	1913	14414.7	1913	7526.67
1914	12645.6	1914	5789.09	1914	6284.19	1914	5877.6	1914	12590.7	1914	8143.14	1914	13858.8	1914	6703.62
1915	12312.2	1915	6121.49	1915	6501.11	1915	5112.06	1915	13832.8	1915	7994.02	1915	13895.4	1915	6492.2
1916	12741.6	1916	5728.72	1916	7217.48	1916	5477.23	1916	13857.3	1916	7727.17	1916	13195.8	1916	6325.31
1917	13195.4	1917	6152.48	1917	7380.65	1917	4500.88	1917	14531.7	1917	8558.18	1917	13065.8	1917	6654.51
1918	12552.1	1918	5868.62	1918	6812.93	1918	4718.21	1918	13412.2	1918	7616.98	1918	12924.6	1918	7038.35
1919	13329.6	1919	6375.62	1919	6696.66	1919	5235.65	1919	12472.2	1919	8248.04	1919	13211.2	1919	8027.68
1920	14717.2	1920	7699.71	1920	6596.4	1920	4978.92	1920	11480.8	1920	7050.59	1920	13867.2	1920	7597.58
1921	16453.4	1921	7895.2	1921	5882.21	1921	3483.78	1921	11661.1	1921	9506.59	1921	13415.9	1921	7468.56
1922	19639.1	1922	9578.52	1922	6313.65	1922	4346.35	1922	12496.5	1922	10647.8	1922	14228.5	1922	8630.32
1923	22139.1	1923	9936.86	1923	6269.92	1923	4794.85	1923	13229.2	1923	12559.2	1923	14882.6	1923	8533.08
1924	20430.3	1924	10099.1	1924	6326.27	1924	4794.71	1924	13748.5	1924	13368.6	1924	13693.3	1924	8366.52
1925	23084.1	1925	9898.69	1925	6183.89	1925	5566.04	1925	14047.6	1925	14689.2	1925	15501.3	1925	9051.27
1926	22125.2	1926	9482.54	1926	5337.45	1926	4857.2	1926	13352	1926	15274.1	1926	16892.3	1926	9140.18
1927	20733	1927	8498.64	1927	4111.95	1927	3757.97	1927	13921.1	1927	15217.4	1927	15033.6	1927	7728.87
1928	19569.4	1928	6913.59	1928	4269.2	1928	3963.82	1928	12540.1	1928	12853.9	1928	15116.1	1928	8271.79
1929	16048.5	1929	5781.48	1929	4176.27	1929	4081.68	1929	13366.4	1929	12358.3	1929	15601.9	1929	8875.59
1930	13266	1930	5090.26	1930	5348.64	1930	4985.29	1930	12202.8	1930	11045.6	1930	15571.6	1930	8444.63
1931	14247.1	1931	6352.83	1931	5467.45	1931	4207.76	1931	11742.3	1931	9856.33	1931	15528.1	1931	8684.82
1932	15048.1	1932	6431.07	1932	5313.08	1932	3939.21	1932	10490.2	1932	10080.9	1932	16043.8	1932	8762.29
1933	14114.5	1933	4973.94	1933	5452.64	1933	3720.24	1933	8945.74	1933	9475.11	1933	16339.2	1933	9250.97
1934	13651.6	1934	5071.36	1934	5357.51	1934	4068.5	1934	9514.8	1934	9246.25	1934	15809.7	1934	8311.72
1935	14596.1	1935	5888.65	1935	5233.92	1935	4643.81	1935	9223.58	1935	6847.19	1935	13570.2	1935	7265.94
1936	15895.2	1936	6995.81	1936	5014.12	1936	5218.21	1936	10053.9	1936	6698.32	1936	15380.5	1936	9094.72
1937	18062.2	1937	7979.25	1937	3549.94	1937	3318.46	1937	9028.53	1937	6201.81	1937	14886.5	1937	8682.28
1938	15843.1	1938	6570.88	1938	4442.33	1938	4093.23	1938	9860.76	1938	6997.88	1938	12963.9	1938	7459.02
1939	12409.4	1939	5607.02	1939	5703.52	1939	4434.89	1939	10279.4	1939	5384.58	1939	15811	1939	9820.44
1940	7896.09	1940	4184.18	1940	9352.92	1940	7433.47	1940	11198.7	1940	6577.59	1940	13545.6	1940	8657.84
1941	9391.27	1941	5698.23	1941	13600	1941	10442.3	1941	11037.4	1941	7195.9	1941	16535.5	1941	10349.7
1942	7647.52	1942	5377.83	1942	16329.7	1942	11468.2	1942	9360.25	1942	5189.15	1942	16408.9	1942	10506.3
1943	12684.8	1943	8514.73	1943	14062.7	1943	9043.91	1943	8049.82	1943	5834.31	1943	16033.9	1943	10640.9
1944	11271.5	1944	7540.49	1944	11079.1	1944	5965.84	1944	6915.05	1944	6129.67	1944	16419.9	1944	10612
1945	17137.2	1945	8483.84	1945	10445.6	1945	5939.56	1945	6887.42	1945	6885.9	1945	17189.5	1945	11000.7
1946	17326.8	1946	6735.53	1946	10692.1	1946	6949.94	1946	6753.55	1946	8309.96	1946	16333.6	1946	10113.9
1947	15876.3	1947	5428.04	1947	11801.8	1947	8551.81	1947	6795.97	1947	7379.27	1947	15703.3	1947	9863.01
1948	14503.8	1948	4158.65	1948	15616.6	1948	12392	1948	6605.42	1948	5836.32	1948	14256	1948	8524.2
1949	19623.8	1949	7043.43	1949	13859.8	1949	11373.1	1949	7728.47	1949	6065.52	1949	12220	1949	7517.19
1950	18203.3	1950	6009.18	1950	17423.2	1950	13837.3	1950	8571.83	1950	9159.97	1950	14815	1950	9390.23
1951	19421	1951	4581.64	1951	13982.7	1951	10999	1951	10770.7	1951	9914.29	1951	13800.3	1951	8606.68
1952	19970.6	1952	5407.13	1952	16120.9	1952	12860	1952	10599.3	1952	9120.96	1952	14368.3	1952	8790.22
1953	21107.1	1953	6148.94	1953	14331.4	1953	8654.78	1953	10320.8	1953	9752.34	1953	11306.7	1953	6664.99
1954	20183.8	1954	7264.97	1954	13400.7	1954	8067.35	1954	9204.54	1954	9124.69	1954	7043.22	1954	3943.22
1955	17986	1955	6295.51	1955	12583.4	1955	8163.5	1955	8618.05	1955	8108.39	1955	11230.9	1955	6247.96
1956	15922.8	1956	5547.4	1956	11752.8	1956	7470.45	1956	9409	1956	9127.82	1956	12403.5	1956	7321.2
1957	14208.4	1957	5657.34	1957	11497.4	1957	9475.56	1957	12069.5	1957	9897.79	1957	6444.33	1957	4600.39
1958	14613.6	1958	5795.21	1958	11271.6	1958	8798.68	1958	12518.5	1958	10594.4	1958	6173.76	1958	5090.81
1959	13666.6	1959	5613.33	1959	11749.4	1959	8356.73	1959	10183.8	1959	11229.9	1959	7099.67	1959	6092.8
1960	15196.2	1960	6301.64	1960	11676.9	1960	8745.4	1960	10436	1960	9245.05	1960	5959.41	1960	4901
1961	15568.4	1961	5550.32	1961	12166.8	1961	8375.05	1961	9185.65	1961	10426.1	1961	5448.16	1961	4286.95
1962	17000.7	1962	6892.06	1962	12042.3	1962	8789.5	1962	10802.4	1962	10418.3	1962	6220.65	1962	3924.61
1963	19033.8	1963	8648.77	1963	12296.8	1963	8445.73	1963	10747.5	1963	12205.8	1963	6684.4	1963	3830.05
1964	18457.4	1964	8032.88	1964	9963.35	1964	7204.26	1964	10161.2	1964	13871.3	1964	8676.76	1964	4222.02
1965	22947	1965	9893.83	1965	12134.6	1965	8940.4	1965	10345.5	1965	12833.7	1965	9622.25	1965	4790.8
1966	22494.9	1966	10327	1966	10706.7	1966	7276.58	1966	10988.7	1966	12233.9	1966	9897.43	1966	5340.01
1967	24411	1967	10002.1	1967	11072.2	1967	8533.98	1967	10891.8	1967	12738.4	1967	9587.82	1967	6026.96
1968	28548.8	1968	11782.9	1968	11911.2	1968	8718.29	1968	10206	1968	11469.6	1968	8781.78	1968	5907.5
1969	28023.1	1969	11884.4	1969	11523.1	1969	6727.29	1969	11102.4	1969	11517.3	1969	10015.3	1969	6554.31
1970	26733.8	1970	11670	1970	11212.2	1970	7049.04	1970	10487.9	1970	10902.2	1970	10063.6	1970	6579.61
1971	26764.6	1971	11556.3	1971	9902.65	1971	6407.22	1971	10954.9	1971	12156.3	1971	8287.44	1971	5976.33
1972	26163.9	1972	11394	1972	8925.87	1972	7274.73	1972	11297.1	1972	13547.8	1972	10570.7	1972	6001.01
1973	26030.3	1973	12406.7	1973	9399.58	1973	7661.99	1973	11278.8	1973	13301.7	1973	12056.6	1973	6698.84
1974	24983.7	1974	11643.8	1974	9340.2	1974	7353.92	1974	10733.4	1974	12575.5	1974	12904.6	1974	6540.28
1975	24821.4	1975	11376.9	1975	8966.39	1975	7090.46	1975	11271.4	1975	12116.4	1975	12676.3	1975	7050.43
1976	23960.9	1976	10176.1	1976	8412.73	1976	7051.19	1976	11571.3	1976	13404.3	1976	12295.1	1976	7069.21
1977	24600.2	1977	10479.8	1977	8579.44	1977	6456.19	1977	13151.8	1977	12971.2	1977	11501.4	1977	7043.32
1978	23264.6	1978	9896.38	1978	8447.3	1978	6060.99	1978	13389.9	1978	11371.8	1978	11678.3	1978	7528.94
1979	25040.3	1979	11125	1979	8344.25	1979	5981.89	1979	13444.1	1979	8829.21	1979	12610.1	1979	8557.98
1980	22453.9	1980	9977.49	1980	7533.88	1980	4975.48	1980	12224.8	1980	8025.58	1980	13120.2	1980	9166.37
1981	19715.6	1981	8907.98	1981	9152.17	1981	6086.32	1981	10816.1	1981	5496.1	1981	13902.2	1981	10029.1
1982	18686.9	1982	7673.54	1982	7669.85	1982	5749.18	1982	9999.21	1982	3704.01	1982	13729.9	1982	7998.69
1983	20138.4	1983	9465.59	1983	6824.93	1983	4937.79	1983	10617.3	1983	5183.64	1983	13993	1983	8402.26
1984	23063.4	1984	11653.2	1984	7424.14	1984	4524.66	1984	9040.46	1984	3724.16	1984	12848.5	1984	8013.4
1985	18381.9	1985	9269.76	1985	6623.47	1985	3887.35	1985	9018.2	1985	5923.78	1985	13852.7	1985	10027.9
1986	19525.7	1986	10286.8	1986	7973.49	1986	4569.33	1986	8850.16	1986	6070.5	1986	13388.5	1986	9417.33
1987	22672.3	1987	11558.2	1987	7470.22	1987	4598.37	1987	7992.52	1987	5102.61	1987	12808.9	1987	8132.43
1988	18549.4	1988	8905.15	1988	7188.31	1988	5709.65	1988	6763.71	1988	4896.71	1988	12518.1	1988	7910.81
1989	18060.3	1989	9428.78	1989	7600.23	1989	6279.83	1989	6875.47	1989	5135.43	1989	12937.8	1989	7935.21
1990	19679.6	1990	9266.99	1990	11154.3	1990	8427.68	1990	7771.83	1990	6455.5	1990	13635.1	1990	8855.24
1991	19848.6	1991	10715.1	1991	9110.61	1991	5784.07	1991	8089.49	1991	6587.44	1991	13393.9	1991	9816.26
1992	20639.3	1992	10980.6	1992	8577.4	1992	7376.42	1992	7427.03	1992	5853.71	1992	11938	1992	8216.16
1993	18860.2	1993	9871.23	1993	11929.8	1993	6958	1993	6513.09	1993	3665.48	1993	10036.7	1993	7177.43
1994	18533.9	1994	9803.83	1994	11082.2	1994	7059.17	1994	8417.78	1994	6118.72	1994	7281.68	1994	5546.08
1995	18168.8	1995	9066.02	1995	10984.9	1995	7432.04	1995	10306.1	1995	5968.84	1995	6468.86	1995	5201.65
1996	22005.6	1996	11187	1996	10810.4	1996	6640.94	1996	11060.6	1996	5033.2	1996	7267.89	1996	5709.1
1997	23397.5	1997	11867.5	1997	10288.7	1997	6462.73	1997	10925.7	1997	3810.73	1997	7571.52	1997	5781.36
[truncated: 6,003 more rows]

## Sheet: T141A-G142A
GFP		RFP		GFP		RFP		GFP		RFP		GFP		RFP
Pixel	Intensity	Pixel	Intensity	Pixel	Intensity	Pixel	Intensity	Pixel	Intensity	Pixel	Intensity	Pixel	Intensity	Pixel	Intensity
0	3280.75	0	2267.16	0	6520.78	0	2266.21	0	10799.1	0	9030.21	0	12284.6	0	6122.22
1	2904.01	1	1965.93	1	6604.16	1	1075.07	1	11007.7	1	9905	1	12277.1	1	5607.6	Fluorescence intensity recorded along microtubules for the RFP and GFP channels (as described in Methods) and for indicated RFP- and GFP- tagged proteins .
2	2942.25	2	2365.45	2	7829	2	2364.98	2	10196.4	2	9198.94	2	12941	2	6411.39
3	2923.51	3	2700.95	3	9762.35	3	2716.01	3	11130.7	3	9492.66	3	13489.3	3	6803.12
4	2069.9	4	2730.33	4	9607.36	4	2635.86	4	10581.7	4	8911.44	4	12664.8	4	6609.28
5	2955.25	5	3415.69	5	8865.52	5	2687.95	5	10377.3	5	8075.19	5	13268.7	5	7166.91
6	3827.26	6	3978.76	6	7354.72	6	3390.64	6	11062.1	6	8723.94	6	13538.2	6	8241.29
7	3324.05	7	3432.16	7	6660.05	7	3398.65	7	10731.6	7	8399.69	7	12915.5	7	7245.28
8	4973.38	8	4026.27	8	8411.76	8	4047.58	8	10519.1	8	9091.73	8	13554.8	8	8284.49
9	5128.6	9	4278.4	9	6740.11	9	3179.03	9	10046	9	8460.52	9	12327.7	9	7516.06
10	6434.64	10	5613.92	10	6028.25	10	2716.37	10	8877.84	10	7721.02	10	11579.8	10	6885.65
11	6742.36	11	4670.55	11	6685.81	11	2583.02	11	9089.01	11	8109.4	11	12901.9	11	7749.31
12	5986.61	12	3726.36	12	6938.09	12	2623	12	8829.3	12	7633.44	12	13545.8	12	8633.1
13	6274.66	13	4419.63	13	7459.66	13	3103.18	13	8235.05	13	7111.55	13	13239	13	7418.65
14	6028.64	14	4236.9	14	8054.03	14	3332.5	14	7588.58	14	7015.62	14	13243.1	14	6940.04
15	5473.92	15	2713.01	15	8022.15	15	3360.33	15	7186.93	15	6925.41	15	12952.1	15	6742.91
16	4031.74	16	1498.9	16	6850.56	16	3244.05	16	7720.35	16	8045.02	16	12040.7	16	6372
17	2429.67	17	316.265	17	7407.81	17	3379.41	17	8487.54	17	8711.78	17	13930.2	17	7365.38
18	1941.11	18	610.489	18	8034.18	18	4059.94	18	7242.96	18	8367.31	18	12708.5	18	6486.86
19	2676.2	19	938.025	19	7602.47	19	3669.63	19	5893.5	19	6864.5	19	12988.2	19	6846.93
20	2692.37	20	1052.6	20	7446.74	20	4201.06	20	5849.11	20	6827.45	20	13704.4	20	7757.44
21	2820.54	21	1625.08	21	6983.3	21	4142.07	21	6033.97	21	7034.48	21	14217.9	21	9123.8
22	2998.3	22	1114.14	22	4728.55	22	3377.17	22	7136.64	22	7147.84	22	14119.9	22	7440.94
23	3393.65	23	1143.51	23	3728.89	23	1429.5	23	6505.99	23	6397.55	23	13722.6	23	7760.56
24	4309.99	24	2766.34	24	4325.19	24	1232.67	24	5897.69	24	7501.82	24	14672.2	24	10074.5
25	3901.01	25	2247.74	25	4595.22	25	1103.25	25	5566.1	25	6778.72	25	15068.7	25	11078.5
26	4237.72	26	1984.58	26	3410.3	26	676.651	26	6213.86	26	6521.87	26	16871.7	26	10772.2
27	4607.65	27	2548.63	27	5779.08	27	1181.37	27	7677.3	27	7373.65	27	18386	27	11733.3
28	4520.48	28	2414.59	28	6129.59	28	1809.93	28	7611.24	28	7331.23	28	17541.5	28	12767.4
29	3959.15	29	2348.97	29	8597.62	29	3640.27	29	8639.13	29	7640.81	29	18628.4	29	13490.6
30	4002.38	30	2942.36	30	9197.12	30	4122.49	30	8522.9	30	7705.75	30	18011.1	30	14417.6
31	3329.89	31	2694.34	31	9634.51	31	4824.45	31	8684.61	31	7510.41	31	16635	31	15174.3
32	2936.18	32	2079.19	32	10288.4	32	5177.48	32	8558.77	32	7976.85	32	17424.6	32	16022.5
33	2810.44	33	2063.89	33	10604.7	33	5750.77	33	9222.17	33	8783.53	33	17586	33	16290.4
34	1189.35	34	919.582	34	11926.4	34	8080.58	34	9367.94	34	8672.08	34	18217.6	34	15302.6
35	1401.03	35	1263.12	35	9434.64	35	7547.83	35	10903.5	35	9978.57	35	17439.5	35	15368.9
36	1891.97	36	2044.86	36	6946.56	36	6715.03	36	10487.1	36	10185	36	17724.3	36	14886.7
37	2891.31	37	3299.41	37	7364.44	37	6568.99	37	11195.7	37	11175.8	37	18744.3	37	15240.9
38	4503.27	38	4006.9	38	7461.62	38	5674.14	38	10855	38	10641.8	38	18517.8	38	14281.7
39	6345.99	39	4204.47	39	9173.21	39	7052.15	39	10019.8	39	11282.3	39	17910.5	39	13614.2
40	7406.17	40	4173.88	40	6881.83	40	5896	40	11043.1	40	12020.2	40	16982.8	40	12967.1
41	7399.46	41	3672.19	41	7039.58	41	6422.96	41	9745.2	41	10352.1	41	15720.9	41	13481.9
42	5637.22	42	2266.4	42	7099.89	42	6780.98	42	11047.8	42	12308.5	42	14262.1	42	12203.6
43	3912.8	43	2188.38	43	8496.24	43	7977.28	43	9407.36	43	10038	43	14556.5	43	13996.1
44	3383.32	44	1655.09	44	8310.11	44	6657.77	44	7636.65	44	9657.4	44	14102	44	12618.2
45	2745.11	45	1046.71	45	7781.96	45	3608.47	45	8095.87	45	9384.66	45	15342.2	45	11687
46	2826.53	46	1428.42	46	8197.4	46	3787.17	46	6889.79	46	8169.82	46	15702.8	46	10067.9
47	2807.12	47	2377.89	47	8114.56	47	4821.94	47	6128.79	47	6800.58	47	16769.2	47	9936.32
48	3319.86	48	2816.84	48	7892.38	48	5702.68	48	5894.76	48	6460.97	48	17654.7	48	10452.4
49	2903.9	49	3194.34	49	8631.57	49	3543.69	49	5680.88	49	6096.6	49	17434.1	49	11614.6
50	3621	50	3020.28	50	9651.56	50	3425.02	50	6333.1	50	6514.99	50	16940.4	50	12327.8
51	4510.06	51	2689.4	51	8593.82	51	2286.06	51	7413.52	51	7466.6	51	16707	51	11671.9
52	4863.35	52	3025.06	52	7993.47	52	2402.42	52	8293.42	52	7144.35	52	16352	52	12020.2
53	3879.68	53	2668.91	53	6846.75	53	2874.45	53	7700.81	53	6529.13	53	17254.5	53	13136.9
54	3500.72	54	2833.29	54	7104.29	54	3263.96	54	7587.63	54	6157.75	54	19060	54	15117
55	2743.07	55	2359.21	55	6949.13	55	5492.12	55	7358.87	55	6247.66	55	20632.7	55	16946.5
56	3397.67	56	2371.82	56	7859.91	56	6855.38	56	6063.78	56	5993.38	56	20632	56	19247.9
57	3234.86	57	1905.81	57	8722.22	57	6494.86	57	5964.84	57	7048.65	57	21966.5	57	20228.3
58	2706.95	58	1640.25	58	9220.56	58	5888.74	58	5798.07	58	7077.05	58	21737.9	58	20931.5
59	2960.96	59	1853.42	59	8045.86	59	4849.6	59	5697.67	59	7159.84	59	21243.1	59	19778
60	2538.45	60	1690	60	6537.29	60	5081.84	60	4937.49	60	5932.28	60	21057.2	60	19183.8
61	2651.18	61	1116.4	61	6533.99	61	4466.14	61	4701.77	61	5756.67	61	21185.5	61	16849.9
62	2232.48	62	1072.18	62	7074.02	62	4792.72	62	3683.43	62	4887.19	62	20999	62	17506.5
63	2104.82	63	921.095	63	8614.95	63	6936.91	63	2618.34	63	4077.79	63	19744.5	63	16238.6
64	2481.02	64	841.087	64	6931.77	64	8122.1	64	1769.61	64	2689.7	64	18593.2	64	15767.8
65	3543.45	65	1099.58	65	5825.5	65	7054.84	65	1233.34	65	2184.1	65	18400.9	65	15012.5
66	5027.85	66	1901.96	66	2564.01	66	3353.74	66	1057.78	66	3214.53	66	18802.6	66	15151.9
67	5278.21	67	1938.55	67	2461.4	67	3589.11	67	464.014	67	1283.62	67	18732.6	67	15150.5
68	4833.72	68	1311.59	68	3592.77	68	4353.63	68	794.503	68	2196.45	68	18999.9	68	16348.6
69	3520.11	69	685.33	69	4765.43	69	3321.48	69	799.922	69	1901.33	69	17229.9	69	14550.3
70	2302.61	70	224.623	70	5857.44	70	3200.99	70	891.127	70	1414.9	70	14801.1	70	10964
71	3427.02	71	699.691	71	6146.14	71	3719.78	71	1500.89	71	1936.29	71	15600.5	71	11760.6
72	4159.99	72	611.798	72	7064.53	72	3666.77	72	856.84	72	1136.13	72	16364.2	72	12577.4
73	3626.04	73	625.32	73	7103.25	73	4197.56	73	1780.48	73	2801	73	15755.5	73	10291.6
74	3540.51	74	977.74	74	8147.18	74	3877.89	74	1389.17	74	2433.1	74	15426.7	74	10121.2
75	3701.35	75	764.221	75	10756.3	75	5482.36	75	2536.88	75	4242.7	75	17995.1	75	12295.1
76	3704.89	76	744.795	76	11639.1	76	6282.51	76	2404.32	76	3513.42	76	19495.2	76	14664.6
77	5125.3	77	1756.82	77	9669.08	77	4945.62	77	3359.4	77	4015.14	77	19877	77	16000.6
78	6537.67	78	2947.96	78	7331.2	78	4302.83	78	2029.22	78	2823.3	78	21470.2	78	18639.4
79	6589.25	79	3977.83	79	5787.06	79	3440.48	79	1198.51	79	1757.15	79	22709.8	79	18800.5
80	5798.42	80	4380.46	80	4949.27	80	2479.09	80	2148.87	80	2672.01	80	22314.7	80	19517.1
81	5850.85	81	4883.96	81	4370.71	81	1210.17	81	2101.25	81	2983.26	81	19371.3	81	14758.8
82	4916.81	82	4918.71	82	4628.25	82	3042.29	82	1396.57	82	1501.48	82	16969	82	13409.6
83	4058.88	83	4648.09	83	5645.84	83	4055.84	83	2931.52	83	4593.19	83	17693.1	83	16701.1
84	4198.28	84	5547.9	84	5298.1	84	3273.5	84	6926.9	84	10392.9	84	17276.7	84	19615.3
85	4363.34	85	6555.39	85	5279.6	85	2773.8	85	5105.38	85	7516.98	85	18712.4	85	23269.1
86	5136.01	86	6998.3	86	6225.1	86	4605.41	86	4212.32	86	5566.56	86	17927.9	86	16207.3
87	6126.53	87	7661.44	87	8874.4	87	7444.65	87	3264.68	87	3150.5	87	17650.9	87	14989.7
88	6339.2	88	9152.04	88	9278.13	88	8705.78	88	3972.91	88	4360.09	88	17217.8	88	13733.6
89	6183.04	89	7871.42	89	8456.36	89	7414.27	89	4265.69	89	5850.84	89	16641.2	89	12834.7
90	4464.34	90	5577.61	90	8963.01	90	7843.69	90	3097.13	90	3841.52	90	15789.7	90	12263.2
91	4287.39	91	4701.65	91	8253.57	91	4985.33	91	1744.89	91	1959.93	91	15563.7	91	13106.6
92	3144.96	92	1117.92	92	8087.99	92	5370.12	92	2082.68	92	1671.26	92	15299.6	92	13605
93	2700.54	93	468.076	93	8044.34	93	5611.5	93	3483.36	93	3467.35	93	14169.6	93	13797.7
94	2333.51	94	383.84	94	8338.83	94	4937.12	94	2688.23	94	1955.14	94	14425.2	94	14509
95	2260.8	95	384.45	95	6790.63	95	4081.48	95	3763.11	95	3895.26	95	16065.9	95	18572.4
96	2824.28	96	318.614	96	6678.24	96	3884.47	96	3497.75	96	4230.43	96	17580.2	96	20061.3
97	3354.81	97	279.883	97	7827.19	97	4765.3	97	2725.06	97	3339.64	97	17746.2	97	20887.7
98	2714.45	98	820.791	98	7628.19	98	4766.72	98	1726.25	98	1513.3	98	18779.3	98	19491.6
99	1620.97	99	1108.2	99	7786.06	99	4877.37	99	1143.71	99	796.099	99	17846.3	99	20329.1
100	2263.21	100	2376.12	100	8352.78	100	5294.92	100	1491.79	100	1373.78	100	17243.5	100	19792.8
101	3159.04	101	3135.66	101	8896.85	101	5293.6	101	1054.58	101	755.719	101	17023.7	101	19811.8
102	3489.6	102	2643.15	102	9190.1	102	5584.36	102	1374.1	102	871.121	102	16534.9	102	20947.6
103	4026.41	103	2687.68	103	8911.44	103	6007.78	103	1255.82	103	826.926	103	14529.3	103	17616.1
104	4109.47	104	2663.34	104	6626.14	104	5222.07	104	1673.73	104	1140.17	104	11978.1	104	13588
105	5167.93	105	3175.78	105	8130.01	105	5467	105	3722.53	105	2763.55	105	12869.8	105	15061
106	4261.08	106	2617.56	106	8051.08	106	5243.94	106	3371.48	106	2696.71	106	15104.7	106	15355.2
107	4159.58	107	2629.14	107	7915.2	107	6084.8	107	3923.88	107	3465.88	107	16124.3	107	13031.2
108	4241.07	108	2855.68	108	6260.85	108	5706.92	108	2902.48	108	2774.18	108	16927	108	13705.6
109	3539.48	109	2227.44	109	6462.15	109	6776.43	109	1826.52	109	2319.95	109	13985.9	109	11565.6
110	3515.63	110	3112.73	110	7042.19	110	6801.6	110	1792.15	110	2763.75	110	17363.9	110	14618.2
111	2412.48	111	2421.61	111	6825.53	111	7155.65	111	2629.84	111	4394.21	111	15642	111	14202.3
112	1878.14	112	1960.19	112	6573.5	112	7127.4	112	2050.32	112	3507.9	112	15677.4	112	14250.3
113	2438.7	113	2164.32	113	7986.12	113	8196.48	113	4380.1	113	5684.32	113	16663.2	113	17499
114	2731.4	114	2116.32	114	6827.93	114	7391.72	114	4016.22	114	5323.2	114	14971.1	114	17883
115	3369.84	115	2911.1	115	8142.33	115	7549.99	115	4385.29	115	5760.18	115	14982.5	115	13689.9
116	4028.31	116	3347.48	116	8456.48	116	8098.62	116	8474.49	116	11321.7	116	10610.7	116	5527.9
117	4332.05	117	2720.57	117	7337.16	117	8078.15	117	7388.65	117	9715	117	11967.9	117	8975.68
118	3886.86	118	2794.83	118	7350.24	118	8388.91	118	12531.1	118	14591	118	7466.25	118	4394.49
119	4723.65	119	3053.4	119	8100.09	119	8412.39	119	9214.3	119	10952.4	119	5827.99	119	6222.49
120	5456.9	120	2511.4	120	8535.97	120	8166.36	120	13808.1	120	14182.3	120	6515.53	120	6264.17
121	5508.72	121	2468.54	121	9491.62	121	8773.15	121	12439.4	121	12951.6	121	7236.05	121	5104.82
122	5825.31	122	3180.92	122	9247.9	122	8056.3	122	17199.5	122	17694.5	122	9372.55	122	5540.32
123	5655.96	123	3361.48	123	8067.01	123	6758	123	13853.2	123	15057	123	9311.98	123	6363.86
124	5444.03	124	3695.42	124	8350.06	124	7646.42	124	11829	124	14329.5	124	9380.09	124	8193.5
125	5882.19	125	4209.15	125	8161.41	125	7494.32	125	10282.6	125	11580.4	125	9006.25	125	8823.22
126	5535.55	126	4271.16	126	6109.17	126	6586.5	126	9833.75	126	9951.05	126	8750.57	126	8393.61
127	3616.61	127	3365.29	127	6018.08	127	6607.72	127	13461.1	127	13030.2	127	9075.78	127	10354.9
128	3571.77	128	2318.26	128	5550.71	128	6266.74	128	10905.2	128	9834.59	128	10324.4	128	10765.8
129	5155.41	129	5012.84	129	3964.58	129	4680.19	129	9253.82	129	8186.13	129	11424.9	129	13169.3
130	3694.78	130	2763.34	130	4220.76	130	5130.47	130	7797.41	130	6829.99	130	13626.3	130	12744.2
131	4871.21	131	4049.42	131	4591.98	131	5753.17	131	6414.94	131	5526.57	131	13623	131	13768.4
132	4072.49	132	2636.08	132	3344.12	132	5140.86	132	5210.48	132	4472.98	132	14373.3	132	12242.3
133	4610.15	133	3009.64	133	4381.42	133	4962.63	133	3847.66	133	3509.11	133	13014.7	133	9833.48
134	5665.6	134	3703.65	134	4675.89	134	5970.39	134	6396.36	134	5194.55	134	11757.7	134	8864.51
135	7195.01	135	4811.93	135	5117.11	135	5144.7	135	5901.68	135	5078.74	135	12211.5	135	9183.58
136	8237.72	136	5155.59	136	6406.48	136	5479.21	136	5098.45	136	4810.97	136	10970.4	136	7280.65
137	8681.17	137	4454.96	137	6705.91	137	5853.03	137	5115.98	137	4785.78	137	9467.38	137	6480.84
138	8197.35	138	4247.76	138	8480.52	138	6423.52	138	4943.19	138	4924.97	138	8336.02	138	6334.03
139	6804.95	139	4206.13	139	9843.01	139	6723.14	139	4860.59	139	4647.49	139	8112.46	139	6547.62
140	5879.08	140	3346.79	140	9277.79	140	6301.81	140	4268.04	140	4089.38	140	8786.79	140	6648.28
141	5342.88	141	2185.64	141	7939.42	141	5677.98	141	4086.62	141	3445.77	141	10732.4	141	7832.75
142	5323.09	142	2453.17	142	9389.82	142	6188.81	142	4656.08	142	3749.55	142	11117.5	142	8624.31
143	5370.15	143	2729.84	143	9952.5	143	7001.24	143	5539.82	143	4522.09	143	11771.5	143	9159.66
144	4236.42	144	2134.64	144	9911.01	144	6255.91	144	6834.01	144	5655.48	144	11312.4	144	8966.61
145	3064.84	145	1984.92	145	11620.2	145	6040.44	145	8071.58	145	7466.79	145	10332.1	145	9733.79
146	2557.88	146	1633.65	146	14309.1	146	5857.37	146	8823.47	146	8453.19	146	9470.61	146	9523.66
147	3073.14	147	2437.2	147	15039	147	6679.17	147	8190.09	147	7190.19	147	9132.2	147	9207.94
148	3811.59	148	3322.1	148	16421.7	148	7349.77	148	6765.39	148	5365.73	148	7701.15	148	7563.78
149	5497.91	149	4395.69	149	21935	149	10161.8	149	4218.88	149	3521.31	149	8170.23	149	8955.21
150	5474.55	150	3544.58	150	20905.8	150	8917.77	150	2461.62	150	1889.45	150	8625.65	150	10081.9
151	5252.75	151	3442.44	151	18915.9	151	7090.08	151	1663.88	151	1224.11	151	9735.35	151	11455.3
152	5163.84	152	3696.42	152	21617.4	152	8105.16	152	2190.44	152	1774.48	152	10252.1	152	12506.1
153	5231.26	153	4574.39	153	19498.7	153	8376.37	153	2710.38	153	2340.67	153	10253.9	153	12067.9
154	5582.94	154	4511.4	154	18648.5	154	7572.6	154	4326.09	154	3667.83	154	10837.3	154	10541
155	5555.61	155	5104.6	155	19594.3	155	8265.26	155	4597.85	155	4103.68	155	11399.8	155	11871.2
156	5343.31	156	4863.08	156	20810.4	156	9624.73	156	5323.43	156	3999.3	156	11384.6	156	11961.2
157	4365.19	157	3744.7	157	21084	157	9659	157	4622.03	157	3355.86	157	10255.8	157	11072.4
158	3537.03	158	2443.76	158	20438	158	7534.18	158	4564.54	158	3719.83	158	10096.5	158	10943
159	2269.93	159	1674.38	159	20216	159	6686.84	159	3903.05	159	3370	159	9333.63	159	9895.74
160	1942.7	160	1539.79	160	18973.7	160	5304.79	160	3984.96	160	3489.02	160	8615.01	160	9734.4
161	2864.91	161	2363.37	161	17239.6	161	4670.96	161	4289.22	161	3787.55	161	9907.31	161	10944.3
162	3133.45	162	2431.49	162	22556.5	162	5499.77	162	4660.59	162	4009.94	162	10711.7	162	12519.3
163	4039.96	163	2695.54	163	20969.1	163	6334.76	163	4657.66	163	4294.02	163	11287.6	163	11996.9
164	4482.75	164	2465.34	164	19777.1	164	5797.46	164	4542.03	164	4278.17	164	11479.6	164	10963.5
165	5947.98	165	3237.7	165	25526.7	165	7662.43	165	3969.82	165	3478.36	165	11196	165	10866.5
166	5845.77	166	4923.48	166	22781.3	166	7839.08	166	3230.87	166	3096.75	166	11684	166	11584.9
167	5780.97	167	4434.07	167	22809.2	167	8128.98	167	3255.5	167	2819.55	167	11604.4	167	11402
168	4896.55	168	3256.52	168	22487.4	168	9482.55	168	3690.53	168	2580.88	168	10889.9	168	10551.6
169	4544.1	169	2679.84	169	21824.4	169	10173.2	169	3856.63	169	2598.21	169	10658.8	169	10206.1
170	4604.69	170	2896.2	170	21591.1	170	10279.6	170	3486.17	170	2884.45	170	11217.1	170	8710.22
171	2539.12	171	1284.48	171	20193.4	171	9088.98	171	3185.8	171	2894.09	171	9899.91	171	8524.02
172	2446.93	172	846.057	172	21285.9	172	9270.42	172	3205.01	172	2408.46	172	9891.52	172	8863.72
173	3606.14	173	946.522	173	10830.3	173	3031.53	173	3335.86	173	2890.37	173	10417.3	173	9348.53
174	3126.94	174	1292.17	174	14643.3	174	4747.36	174	3414.66	174	2731.61	174	11114.2	174	8791.02
175	3232.64	175	1979.36	175	4953.55	175	987.075	175	3219.55	175	2980.45	175	9059.3	175	5139.94
176	4330.63	176	2256.47	176	8462.71	176	2403.63	176	3201.65	176	2845.38	176	9037.48	176	5366.16
177	4469.49	177	2316.04	177	5906.42	177	1547.08	177	3070.15	177	2878.19	177	9359.41	177	3607.38
178	4188.87	178	2087.36	178	1753.42	178	317.9	178	3198.54	178	3006.74	178	10019	178	3287.75
179	4987.63	179	2384.71	179	3345.19	179	1014.38	179	3109.04	179	2872.14	179	10284.3	179	3816.19
180	5822.44	180	2929.99	180	1045.84	180	827.179	180	2973.98	180	3069.66	180	10353.6	180	6956.96
181	7491.24	181	4134.7	181	1369.71	181	1290.33	181	3314.69	181	3154.9	181	12271.5	181	8076.54
182	8802.95	182	4648.13	182	2435.49	182	1740.11	182	3233.53	182	2892.47	182	11924	182	7016.88
183	9684.22	183	5023.47	183	3444.79	183	2403.8	183	4707.52	183	3397.3	183	9308.42	183	3567.99
184	9227.11	184	5017.25	184	3080.35	184	2392.18	184	5683.32	184	3690.53	184	8740.3	184	4231.27
185	10301.8	185	5106.69	185	6944.61	185	3696.75	185	5599.9	185	4485.44	185	8628.9	185	5160.01
186	10582	186	5199.59	186	4996.89	186	2807.5	186	5286.98	186	4275.24	186	9676.74	186	7039.73
187	9846.27	187	5143.13	187	5275.1	187	2540.13	187	4910.62	187	4412.67	187	12067.1	187	10537.2
188	7186.34	188	3835.44	188	5434.76	188	2231.61	188	5089.77	188	4327.35	188	11895.6	188	8458.94
189	5816.04	189	3089.22	189	5736.77	189	3152.69	189	5185.55	189	4132.41	189	13467.5	189	11797.9
190	5272.42	190	2986.86	190	5134.6	190	3356.38	190	4969.77	190	4683.17	190	12732.6	190	13250.3
191	5570.25	191	3321.22	191	5679.61	191	3751.32	191	5978.58	191	5014.29	191	11822.6	191	12520.6
192	5323.1	192	3115.36	192	6100.38	192	2983.21	192	6959.9	192	5636.53	192	8063.24	192	7281.79
193	4879.87	193	2264.1	193	5840.3	193	3121.64	193	6103.9	193	5010.44	193	4464.2	193	4907.17
194	4611.61	194	1841.57	194	6234.29	194	2928.03	194	6473.39	194	4875.95	194	3476.5	194	6376.58
195	5279.73	195	2003.86	195	6855.64	195	3167.96	195	6908.82	195	5080.06	195	7097.45	195	8152.59
196	5310.24	196	1703.68	196	6453.48	196	2874.15	196	6529.08	196	4600.35	196	7468.75	196	8540.78
197	5012.06	197	2189.37	197	6802.86	197	4084.88	197	6352.99	197	4723.8	197	5629.6	197	8297.45
198	4132.56	198	3001.74	198	6279.33	198	4606.97	198	6498.9	198	5385.08	198	4172.81	198	5698.76
199	4125.82	199	2921.98	199	6014.4	199	3736.86	199	6635.3	199	5131.52	199	4483.67	199	4084.07
200	4196.15	200	3255	200	5180.73	200	2808.64	200	6452.47	200	5670.76	200	6529.4	200	4597.77
201	4981.22	201	3550.83	201	4545.14	201	2750.72	201	6140.3	201	4814.17	201	9282.36	201	6550.75
202	6031.83	202	4008.64	202	5204.34	202	3374.27	202	6375.21	202	5665.84	202	11906.2	202	8131.63
203	6538.94	203	3914.65	203	6784.32	203	4545.1	203	6757.4	203	6501.41	203	14155.9	203	10644.7
204	7639.04	204	4267.5	204	6924.95	204	4462.34	204	7486.39	204	6722.5	204	15229.1	204	12273.1
205	5981.55	205	3594.34	205	7578.89	205	3911.75	205	7934.78	205	7038.99	205	15885.6	205	14860
206	5005.66	206	3718.42	206	8193.1	206	4843.3	206	7797.23	206	7340.82	206	14192.2	206	11511
207	6096.37	207	3349.53	207	8484.03	207	5122.44	207	7573.58	207	6313.78	207	14487.4	207	14962.9
208	5911.74	208	2969.43	208	9376.55	208	6125.36	208	7501.47	208	6611.19	208	13885.4	208	14079.8
209	4395.28	209	3356.23	209	9235.77	209	6299.45	209	7060.34	209	6959.21	209	14753.4	209	14248
210	4639.2	210	3562.78	210	7725.01	210	4928.08	210	7041.16	210	6931.77	210	13680.6	210	13338.7
211	4697.88	211	4178.59	211	9001.06	211	6882.66	211	6920.6	211	6586.69	211	13274.8	211	13655.6
212	3971.96	212	2723.66	212	9309.12	212	6631.84	212	6583.81	212	6099.9	212	12957.3	212	13821.3
213	5443.96	213	4033.01	213	8735.6	213	6230.52	213	6633.63	213	6233.79	213	10578.7	213	10825.7
214	4711.61	214	3856.28	214	6820.95	214	4957.1	214	6879.14	214	6413.11	214	8663.19	214	8836.73
215	4032.19	215	3909.89	215	7076.77	215	4483.93	215	6638.23	215	6903.6	215	7677.44	215	9547.24
216	4531.22	216	4136.01	216	6505.92	216	3637.2	216	7547.35	216	7977.73	216	6202.57	216	9404.48
217	2846.33	217	2578.65	217	5378.23	217	3003.49	217	7402.77	217	7443.61	217	4645.62	217	5704.12
218	2508.43	218	2120.39	218	5694.53	218	3522.1	218	7339.07	218	7362.19	218	4122.04	218	5363.36
219	2540.63	219	1922.5	219	4402.17	219	1556.76	219	6857.52	219	6448.41	219	3752.05	219	4991.96
220	2808.06	220	1728.44	220	4304.51	220	1623.22	220	6786.17	220	6462.41	220	4286.18	220	5304.71
221	2765.93	221	1756.63	221	3277.31	221	1313.42	221	6004.37	221	5749.16	221	4697.4	221	5752.49
222	1939.82	222	979.395	222	2436.29	222	843.751	222	5952.25	222	5950.33	222	4927.94	222	6306.83
223	1956.35	223	1195.89	223	2427.77	223	1254.29	223	5665.19	223	5486.67	223	5297.31	223	6065.13
224	1631.69	224	958.591	224	2297	224	678.323	224	4915.55	224	5095.29	224	5900.43	224	5259.46
225	1917.87	225	1035.05	225	2781.47	225	626.77	225	5808.67	225	5940.03	225	6055.95	225	6153.89
226	2493.76	226	1499.9	226	2339.71	226	664.534	226	5791.63	226	6374.72	226	6433.14	226	5350.03
227	2936.2	227	1754.06	227	2917.07	227	840.921	227	6163.18	227	6981.26	227	7264.78	227	6145.51
228	3318.45	228	1653.27	228	3038.43	228	1056.63	228	6237.42	228	6610.16	228	8733.43	228	6658.02
229	3520.47	229	1110.07	229	3690.39	229	696.309	229	6534.35	229	7421.95	229	9425.61	229	8952.09
230	3441.96	230	1394.59	230	4856.29	230	2450.36	230	7205.15	230	7263.97	230	9428.93	230	10218.9
231	4417.48	231	1490.54	231	3923.06	231	2033.29	231	6932	231	6624.1	231	9640.27	231	9690.92
232	4243.97	232	2165.91	232	3956.77	232	2100.78	232	6657.58	232	5881.58	232	9987.75	232	12519.6
233	3784.66	233	1871.69	233	6122.46	233	6322.98	233	6671.77	233	5792.69	233	10789.4	233	13389.3
234	3187.51	234	1854.62	234	8499.31	234	7347.87	234	6912.67	234	5875.08	234	11711.1	234	14624.4
235	3076.09	235	2472.75	235	6631.7	235	4845.09	235	5919.32	235	5321.59	235	9743.68	235	12968.1
236	3901.04	236	2814.27	236	6527.05	236	6981.21	236	4863.05	236	5018.85	236	8468.72	236	9887.47
237	3755.82	237	1713.99	237	7101.94	237	7048.71	237	4661.38	237	4590.88	237	9979.6	237	10832.2
238	2292.33	238	1168.61	238	6818.22	238	6346.73	238	4737.7	238	4732.18	238	8896.32	238	8323.31
239	2936.79	239	1317.01	239	6113.61	239	5399.77	239	5360.58	239	5029.32	239	7936.39	239	7512.91
240	2600.23	240	965.701	240	6284.01	240	4459.91	240	5559.62	240	4859.31	240	7638.7	240	7118.6
241	2626.82	241	1051.03	241	6226.7	241	3276.53	241	5221.16	241	4524.16	241	7903.05	241	8285.92
242	4593.85	242	1592.99	242	5470.13	242	2591.72	242	5194.56	242	4945.68	242	6771.48	242	7907.21
243	4353.71	243	1579.64	243	4707.93	243	2006.34	243	5056.35	243	4616.48	243	6368.41	243	8531.85
244	4738.5	244	1520.49	244	4586.16	244	1852.18	244	5522.7	244	5399.05	244	7115.88	244	9782.42
245	5756.67	245	1745.74	245	4989.64	245	2209.29	245	6046.86	245	5160.47	245	6653.51	245	9928.31
246	6092.21	246	1960.85	246	4689.69	246	2108.95	246	6456.67	246	5390.8	246	6597.25	246	9024
247	5895.85	247	2533.09	247	4742.6	247	1785.29	247	6436.85	247	5432.31	247	7168.65	247	9143.91
248	7156.85	248	2988.94	248	4251.58	248	2010.1	248	6286.84	248	5485.26	248	5878.67	248	7203
249	6339.33	249	2876.59	249	3260.97	249	2244.56	249	6063.59	249	5577.4	249	5979.42	249	6829.17
250	5962.44	250	1929.93	250	3654.18	250	2241.35	250	6348.41	250	4989.22	250	6391.11	250	6402.86
251	5435.31	251	1804.05	251	4517.38	251	2067.62	251	5693.25	251	5069.27	251	7673.53	251	7271.38
252	5242.64	252	2201.89	252	4831.5	252	2161.5	252	5748.21	252	5462.38	252	7714.89	252	5880.91
253	5165.62	253	2721.33	253	4572.62	253	2262.55	253	4991.5	253	5191.14	253	7396.84	253	5144.83
254	4701.28	254	2701.95	254	3920.16	254	1789.97	254	4935.73	254	5267.31	254	7884.31	254	6940.42
255	4926.39	255	2257.17	255	3309.95	255	1423.48	255	3858.9	255	4412.24	255	8568.85	255	8058.78
256	3988.98	256	2202.83	256	3878.36	256	1436.7	256	4360.47	256	4559.52	256	8325.18	256	6856.48
257	2814.56	257	1846.78	257	4119.54	257	1464.54	257	4137.61	257	4162.01	257	10063.2	257	9734.63
258	2832.6	258	1675.89	258	3316.99	258	1727.77	258	4061.31	258	3970.16	258	11498.8	258	10915.7
259	3025.07	259	2407.34	259	4279.25	259	2406.29	259	4129.58	259	4048.76	259	11614.8	259	10669.1
260	3358.09	260	2028.7	260	3896.23	260	2351.68	260	4506.67	260	4041.81	260	10788.1	260	10575
261	2992.78	261	1599.89	261	3968.25	261	2653.64	261	4892.18	261	3685.22	261	11078.6	261	10453.7
262	2409.69	262	1512.24	262	3806.18	262	2004.96	262	5844.37	262	3442.97	262	10242.9	262	8771.41
263	3614.24	263	2810.24	263	3632.03	263	1885.19	263	6163.14	263	3492.86	263	10568.2	263	7859.36
264	6031.54	264	5149.24	264	3747.55	264	1918.29	264	6442.42	264	4723.55	264	9722.31	264	6036.89
265	6644.33	265	6062.02	265	4055.8	265	2498.74	265	7296.08	265	6368.75	265	6544.96	265	3970.51
266	8742.81	266	7112.98	266	5278.99	266	3115.05	266	7314.27	266	6768.27	266	7872.63	266	5387.83
267	8291.84	267	6392.14	267	3366.6	267	1630.79	267	8297	267	7300.46	267	9451.97	267	6289.48
268	7630.59	268	5966.96	268	4132.84	268	2429.39	268	8503.25	268	7034.26	268	10876	268	8716.05
269	6631.8	269	4961.1	269	3648.79	269	2062.54	269	8523.26	269	6958.37	269	9694.52	269	8119.56
270	4589.51	270	2823.64	270	3348.74	270	1984.43	270	8031.73	270	6389.2	270	10558.6	270	9015.13
271	3704.97	271	2247	271	3654.72	271	1835.62	271	6904.42	271	5842.18	271	11747.3	271	7633.8
272	3165.2	272	2516.08	272	3808.47	272	2589.99	272	7588.37	272	6477.2	272	11948.6	272	7688.81
273	4049.28	273	3833.13	273	4379.55	273	2797.88	273	6899.16	273	5910.62	273	11477.3	273	7357.47
274	5205.06	274	5084.82	274	4108.54	274	1744.89	274	7167.42	274	6050.93	274	12348.9	274	8426.62
275	4028.74	275	3572.59	275	4898.13	275	1229.93	275	7007.34	275	5936.45	275	13317.7	275	10027.4
276	4826.47	276	3647.47	276	4269.14	276	748.7	276	6982.7	276	6408.36	276	13722.5	276	11279.6
277	6363.16	277	4736.57	277	2589.99	277	281.903	277	7338.32	277	7703.03	277	12234.7	277	10894.7
278	6363.99	278	5119.47	278	3429.79	278	602.829	278	7142.52	278	6483.56	278	14249.7	278	12708.2
279	5327.33	279	4822.71	279	3082.91	279	674.925	279	8064.96	279	6747.82	279	15252.8	279	13878.8
280	5615.56	280	4197.85	280	2450.66	280	1445.36	280	7272.4	280	6364.99	280	13755.5	280	11043.8
281	5735.12	281	3891.7	281	2926.06	281	1420.82	281	7553.11	281	5665.57	281	11070	281	9978.7
282	6780.58	282	3784.82	282	1989.72	282	559.161	282	7992.35	282	5980.36	282	9614.97	282	8433.13
283	5945.52	283	4038.07	283	2615.09	283	1686.92	283	7689.27	283	4994.22	283	7192.01	283	6723.9
284	5396.39	284	3827.42	284	2747.86	284	2341.45	284	8549.52	284	6375.81	284	6419.95	284	6794.79
285	4874.47	285	4003.98	285	1977.01	285	2190.49	285	8478.09	285	6510.3	285	5642.26	285	5454.02
286	3258.15	286	3481.17	286	2782.54	286	1568.56	286	8774.36	286	6999.19	286	5850.79	286	5631.57
287	3236.45	287	3064.13	287	4324.66	287	1815.15	287	8702.56	287	6143.06	287	6109.58	287	4576.85
288	3745.12	288	3044.71	288	5251.84	288	1918.87	288	7134.07	288	5426.18	288	6513.84	288	5293.34
289	4331.51	289	3931.3	289	5058.37	289	1697.99	289	5841.84	289	4562.99	289	7042.47	289	5419.04
290	4907.95	290	4365.51	290	4808.24	290	2787.33	290	5760.82	290	4133.82	290	8097.06	290	6690.96
291	4516.77	291	4636.98	291	4144.59	291	2767.25	291	5903.36	291	4690.44	291	8832.21	291	7671.32
292	3817.11	292	4758.57	292	3817.14	292	2837.59	292	5240.17	292	6186.04	292	9415.35	292	8074.11
293	3134.71	293	3535.2	293	4260.27	293	2084.24	293	5570.74	293	6349.43	293	10587.3	293	9876.38
294	4041.45	294	4349.53	294	4595.03	294	3636.48	294	5262.31	294	4727.29	294	11635.2	294	10918.7
295	4792.06	295	4629.29	295	5058.37	295	3800.39	295	5287.19	295	3599.15	295	12813.4	295	10751.5
296	4735.79	296	4779.92	296	5945.25	296	4044.92	296	6297.98	296	4741.83	296	12507.9	296	10997.9
297	4126.08	297	4303.12	297	6469.4	297	4387.12	297	6240.18	297	3224.97	297	12476	297	12471.6
298	4671.1	298	4763.74	298	7192.95	298	4909.35	298	5773.33	298	3406.7	298	11756.6	298	11714.9
299	5041.44	299	5910.19	299	6874.72	299	4715.14	299	5373.04	299	3050.79	299	11567.9	299	9879.84
300	5647.82	300	6324.4	300	8199.72	300	4880.37	300	5306.74	300	3660.17	300	10668.3	300	10219.4
301	5056.29	301	5245.94	301	7286.17	301	4571.99	301	5739.39	301	4026.93	301	9641.07	301	7591.26
302	2569.15	302	4316.3	302	5376.67	302	2691.57	302	5783.81	302	5206.36	302	7779.19	302	4807.67
303	1306.8	303	2732.83	303	5032.97	303	2880.83	303	5765.8	303	4447.63	303	6306.54	303	2618.24
304	3380.71	304	4018.45	304	6396.41	304	3499.38	304	5119	304	4159.24	304	5203.82	304	2307.95
305	4243.5	305	4247.42	305	7332.36	305	3983.95	305	4746.03	305	4067.96	305	4440.98	305	2842.86
306	3647.26	306	3752.57	306	7404.96	306	4066.07	306	4811.45	306	4990.27	306	3294.19	306	2153.31
307	3985.28	307	3716.14	307	7089.34	307	4290.89	307	4131.94	307	4290.39	307	3028.07	307	2356.84
308	5489.41	308	5373.34	308	6911.86	308	3907.49	308	3698.8	308	4101.77	308	4591.2	308	4216.09
309	5060.64	309	4855.02	309	6117.67	309	5304.3	309	4418.54	309	4235.44	309	4109.77	309	4552.09
310	5158.33	310	4642.4	310	5343.79	310	4991.46	310	4109.57	310	4609.99	310	7470.21	310	8243.52
311	5765.3	311	4526.08	311	6109.28	311	4401.81	311	4613.86	311	5346.87	311	7232.57	311	7351.09
312	5068.23	312	3482.68	312	6207.94	312	5181.92	312	4821.52	312	5657.13	312	8928.17	312	9208.15
313	5488.08	313	3955.85	313	7143.92	313	4001.25	313	5173.08	313	6879.1	313	6972.23	313	6544.9
314	4028.76	314	1951.31	314	7453.29	314	3830.98	314	4910.02	314	6452.47	314	3991.29	314	2638.89
315	3238.24	315	1920.7	315	7543.36	315	3791.83	315	4505.03	315	5549.6	315	5237.04	315	4110.35
316	2620.04	316	1621.11	316	7099.16	316	3198.82	316	4720.16	316	5060.77	316	5955.4	316	4859.13
317	2119.69	317	1127.57	317	6635.95	317	3727.77	317	5645.54	317	6068.77	317	7772.31	317	6719.15
318	1713.83	318	1163.3	318	6284.91	318	3428.63	318	6104.79	318	5863.26	318	6472.11	318	7163.41
319	4007.39	319	2316.8	319	7018.41	319	3739.42	319	5344.17	319	5394.95	319	4872.23	319	6361.41
320	3261.26	320	1831.88	320	6513.45	320	2830.66	320	4893.98	320	5185.87	320	4788.7	320	6151.12
321	4277.46	321	2887.25	321	6053.45	321	3549.76	321	4134.76	321	4845.72	321	6748.12	321	5229.49
322	3612.57	322	1937.9	322	5630.83	322	4159.52	322	3775.59	322	4699.85	322	7329.53	322	7801.38
323	4347.78	323	2803.74	323	5075.49	323	3568.52	323	3729.84	323	4429.62	323	8383.65	323	6757.04
324	5046.95	324	3860.18	324	4359.66	324	4441.76	324	2981.13	324	4304.83	324	7306.48	324	6663.55
325	5535.84	325	3979.69	325	4255.15	325	3915.44	325	3286.6	325	4801.09	325	6248.85	325	6341.97
326	6112.54	326	3680.71	326	4712.41	326	4142.77	326	4328.52	326	5655.65	326	7306.07	326	6762.09
327	5421.08	327	4028.33	327	4387.68	327	3365.33	327	4284.53	327	5613.89	327	7664.12	327	5447.08
328	5046.9	328	3561.23	328	4634.65	328	3297	328	4154.88	328	5184.74	328	7971.04	328	5151.61
329	5012.47	329	3129.66	329	4283.12	329	2997.44	329	4220.01	329	4212.82	329	7959	329	5381.47
330	4972.53	330	3669.46	330	3507.84	330	2505.61	330	4701.1	330	4946.28	330	8698.05	330	7386.51
331	5673.31	331	4013.25	331	4511.23	331	2682.38	331	4931.34	331	4323.58	331	9621.51	331	8600.75
332	5828.99	332	3872.15	332	4592.31	332	2769.86	332	5114.92	332	5534.88	332	9685.57	332	8687.05
333	6741.56	333	4743.56	333	4920.23	333	3122.84	333	5008.05	333	4929.96	333	8136.98	333	8475.22
334	8186.52	334	5253.78	334	3848.43	334	3088.61	334	5441.68	334	5808.24	334	7626.56	334	9214.24
335	8841.52	335	5501.03	335	3676.24	335	4178.79	335	5110.49	335	6448.5	335	5339.56	335	6097.47
336	9341.92	336	5675.13	336	3709.15	336	3225.39	336	4240.38	336	5380.54	336	5397.35	336	4463.01
337	9631.89	337	6120.3	337	3207.9	337	3930.62	337	4257.23	337	4727.09	337	8610.29	337	7301.99
338	9584.79	338	7341.93	338	3558.51	338	3547.68	338	4469.65	338	4917.89	338	6542.19	338	5294.37
339	6894.63	339	4871.05	339	3653.47	339	2751.04	339	5346.15	339	6631.44	339	9317.77	339	9002.71
340	7519.72	340	4629.13	340	3453.63	340	3229.56	340	5879.88	340	5854.41	340	11825.3	340	13162.2
341	6476.97	341	4221.11	341	3138.92	341	3458.13	341	5799.58	341	5449.14	341	14600.8	341	16844.1
342	6675.82	342	5103.03	342	4078.4	342	3435.37	342	6009.57	342	5058.46	342	12949.7	342	11190.4
343	6681.8	343	5183.44	343	4054.43	343	3350.93	343	6348.11	343	4895.16	343	10424	343	8561.55
344	7116.81	344	6451	344	4279.46	344	3847.31	344	6366.4	344	5692.54	344	9179.95	344	7321.44
345	7070.2	345	6660.85	345	5130.05	345	3694.44	345	5494.62	345	5263.55	345	8192.18	345	6125.01
346	6368.05	346	5309.62	346	5256.98	346	3329.69	346	5726.95	346	5880.3	346	8744.43	346	7204.41
347	6525.66	347	4473.34	347	5091.14	347	3939.93	347	5483.15	347	5797.44	347	6959.23	347	5541.36
348	6826.12	348	4225.67	348	4597.16	348	2747.25	348	5329.85	348	6520.33	348	9594.4	348	8834.81
349	7181.83	349	4808.85	349	3665.16	349	2807.67	349	4621.42	349	5325.14	349	11519	349	9312.72
350	7528.37	350	5126.64	350	3952.47	350	2530.51	350	4056.61	350	5139.71	350	10675.2	350	7610.47
351	7974.9	351	5894.21	351	4380.23	351	2110.88	351	3774.01	351	5135.46	351	10589.2	351	8564.14
352	7671.54	352	5165.08	352	3656.41	352	2671.55	352	3624.57	352	4786.38	352	8387.63	352	6547.6
353	6326.37	353	3716.33	353	3518.07	353	2401.81	353	3224.83	353	3880.04	353	5944.89	353	4952.64
354	5343.41	354	2947.51	354	4557.64	354	2774.29	354	3276.13	354	3445.83	354	6720.57	354	5494.36
355	4570.62	355	2488.75	355	6641.55	355	4274.4	355	3444.42	355	3323.1	355	9705.2	355	9215.08
356	3906.7	356	1908.08	356	5881.09	356	3943.25	356	4336.12	356	4479	356	6496.68	356	6362.49
357	3186.7	357	1580.05	357	4706.22	357	2915.55	357	4636.24	357	4102.92	357	4888.91	357	5700.44
358	2392.62	358	1526.61	358	5952.99	358	3083.51	358	4931.54	358	3889.8	358	4280.15	358	6038.73
359	2061.57	359	1430.97	359	6252.85	359	3601.86	359	4405.34	359	4462.75	359	4138.25	359	5009.29
360	2085.12	360	1433.96	360	8982.94	360	4875.61	360	3785.4	360	3565.04	360	3668.19	360	5607.66
361	3193.01	361	1836.92	361	7212.46	361	3746	361	3361.49	361	3357.89	361	2509.46	361	4308.85
362	2932.06	362	1465.21	362	7176.6	362	3466.93	362	3639.64	362	2576.16	362	4817.69	362	5981.53
363	3021.2	363	1475.45	363	7532.9	363	4743.97	363	4328.82	363	3299.01	363	7091.11	363	7098.23
364	4152.28	364	2295.84	364	7207.92	364	3766.15	364	4917.57	364	3986.82	364	9213.23	364	8198.3
365	4109.79	365	2392.29	365	7433.44	365	4206.85	365	5694.23	365	4256.45	365	10009.7	365	9069.52
366	5711.33	366	3009.53	366	7048.34	366	4387.44	366	5710.55	366	4954.03	366	10156.8	366	9149.65
367	6194.05	367	3204.78	367	5368.18	367	3767.87	367	6103.26	367	6402.74	367	10855.7	367	10398.8
368	7407.9	368	4098.13	368	5610	368	4123.47	368	6004.63	368	7086.22	368	13251.9	368	14366.4
369	7439.39	369	4780.5	369	5700.21	369	3264.73	369	6357.26	369	6557.86	369	16789.3	369	18487.4
370	7075.51	370	3809.3	370	4945	370	2905.85	370	6456.74	370	6794.62	370	18687.2	370	19005.5
371	6761.52	371	3825.51	371	4173.56	371	3505.89	371	6918.69	371	6577.03	371	17499.9	371	15313.7
372	6851.47	372	4382.22	372	4000.5	372	3493.84	372	7675.07	372	6918.46	372	16388.6	372	14590.5
373	6811.22	373	3974.18	373	3911.45	373	3351.27	373	6843.5	373	6418.28	373	13122.2	373	11531.3
374	6744.99	374	3587.22	374	4263.33	374	3316.47	374	6970.01	374	7180.01	374	13323	374	11381.3
375	6278.83	375	2594.7	375	4203.82	375	2721.17	375	5641.57	375	5781.96	375	15148	375	12638.3
376	5582.74	376	1593	376	4482.37	376	3118.61	376	4616.79	376	4582.26	376	14987.4	376	14938
377	5312.22	377	1924.62	377	4316.72	377	3247.54	377	4541.33	377	4377.24	377	14176.5	377	12499.9
378	4440.61	378	1515.3	378	4801.94	378	2951.38	378	5279.78	378	4925.95	378	12146.6	378	11625
379	3654.2	379	1399.23	379	5609.15	379	3556.28	379	6671.69	379	8081.6	379	12613	379	11239.9
380	2594.38	380	1172.58	380	5349.35	380	3389.49	380	6943.83	380	8023.81	380	11370.4	380	7948.97
381	3109.13	381	1689.25	381	6374.76	381	4793.78	381	6314.44	381	8974.91	381	10259.8	381	7332.92
382	3212.12	382	1205.62	382	5898.4	382	4351.71	382	4834.4	382	7487.52	382	8807.33	382	6108.44
383	4198.29	383	1734.1	383	5654.26	383	3891.66	383	5576.26	383	6998.31	383	8627.76	383	7465.11
384	4844.96	384	1746.1	384	6024.57	384	3395.02	384	5499.54	384	6305.57	384	8356.8	384	6821.5
385	6216.84	385	2957.7	385	5301.16	385	3177.46	385	5073.15	385	6419.9	385	8136.14	385	6504.95
386	5902.61	386	2726.67	386	5115.4	386	3339.21	386	5502.75	386	6935.56	386	9165.68	386	8126.55
387	6054.76	387	4591.38	387	4759.64	387	2653.2	387	5868.31	387	7637.79	387	9446.2	387	8765.06
388	7028.43	388	6732.3	388	4399.49	388	1658.97	388	6362.84	388	7604.61	388	9852.75	388	9056.54
389	8729.03	389	8651.09	389	3810.42	389	1391.55	389	6511.31	389	7608.19	389	8892.6	389	7671.17
390	8878.47	390	7644.8	390	3730.08	390	1217.23	390	6537.42	390	7649.71	390	9398.69	390	7883.75
391	8353.99	391	6294.92	391	3289.01	391	1666.96	391	6436.87	391	8088.97	391	9375.04	391	6837.54
392	8118.27	392	6262	392	2806.93	392	1913.15	392	6026.62	392	7647.89	392	9952.7	392	8338.19
393	8057.94	393	6010.74	393	2976.5	393	1605.07	393	5564.15	393	7759.48	393	12014.4	393	10826.3
394	8633.71	394	6570.27	394	2976.09	394	1366.75	394	5594.52	394	6802.45	394	10833	394	9140.46
395	8907.76	395	7498.76	395	2855.49	395	1207.71	395	4537.46	395	6580.5	395	8950.57	395	6230.66
396	8512.56	396	7200.22	396	2829.68	396	1791.81	396	3467.46	396	5394.73	396	7333.98	396	4371.18
397	7033.88	397	5780.84	397	2793.51	397	2223.72	397	3805.74	397	5912	397	7065.75	397	6055.32
398	6552.85	398	6017.52	398	3509.19	398	2069.82	398	4062.39	398	5605.69	398	6744.44	398	5144.6
399	5770.66	399	5033.64	399	2727.41	399	1849.78	399	4417.63	399	5713.81	399	6193.13	399	4835.71
400	5492.48	400	4199.43	400	4594.23	400	2921.2	400	5063.5	400	6145.53	400	5202.4	400	3693.94
401	5712.7	401	3684.36	401	4001.47	401	2375.09	401	5341.82	401	5981.41	401	4483.76	401	3920.22
402	4826.28	402	2756.6	402	4370.77	402	2583.7	402	5732.05	402	5997.32	402	4560.08	402	4663.19
403	4397.61	403	2833.97	403	5360.37	403	2316.93	403	5300.45	403	6019.32	403	4694.17	403	4620.74
404	5177.63	404	3035.69	404	5515.99	404	1759.27	404	5182.27	404	6130.47	404	5786.06	404	7363.72
405	6398.75	405	3816.16	405	5318.97	405	1706.05	405	4682.87	405	4893.32	405	8042.47	405	10141.1
406	6118.84	406	3366.32	406	4399.09	406	686.045	406	4065.25	406	4310.74	406	8562.19	406	9443.7
407	6248.68	407	3126.36	407	4951.4	407	1680.52	407	3890.31	407	4240.4	407	8411.49	407	7777.7
408	7769.14	408	5079.77	408	5732.67	408	1523.77	408	4422.2	408	5163.74	408	8579.44	408	9148.98
409	9108.18	409	6266.52	409	6681.31	409	1745.79	409	5001.04	409	5787.2	409	9853.87	409	10437.2
410	9781.05	410	7821.4	410	7846.92	410	2563.67	410	5083.97	410	6015.69	410	11119.8	410	12479.3
411	9213.35	411	7171.21	411	8653.52	411	2383.26	411	4625.91	411	6427.24	411	12607.1	411	15359.6
412	8559.75	412	6066.06	412	8405.61	412	2743.17	412	4456.48	412	5282.96	412	13742.3	412	14552.4
413	8606.02	413	6629.67	413	8319.75	413	3573.3	413	4666.64	413	5135.99	413	13141.5	413	14418.6
414	7852.48	414	6847.04	414	8119.48	414	3345.22	414	5328.84	414	4780.22	414	13162	414	12885.5
415	7855.54	415	6767.36	415	6846.53	415	2028.56	415	5671.69	415	4599.35	415	13417.4	415	12200.3
416	7286.11	416	6308.83	416	7242.72	416	3904.23	416	5979.73	416	5129.86	416	11193.9	416	10031.7
417	7598.22	417	6409.26	417	5383.03	417	3101.09	417	6514.71	417	5211.6	417	10591.5	417	8362.06
418	8391.4	418	7015.71	418	6141.37	418	2974.42	418	4990.37	418	3873.96	418	9713.97	418	8021.22
419	8229.91	419	7310.48	419	5891.01	419	2123.11	419	6361.04	419	4818.28	419	8971.91	419	8000.55
420	6289.64	420	6769.72	420	6591.39	420	2428.2	420	7023.59	420	5255.05	420	9196.66	420	6937.19
421	4902.02	421	5573.14	421	7999.09	421	2780.23	421	6707.56	421	4809.82	421	9291.44	421	7908.56
422	5487.57	422	5986.75	422	8868.9	422	3376.22	422	7612.32	422	5731.1	422	9251.93	422	7891.79
423	4285.16	423	4834.17	423	8039.22	423	3045.01	423	8885.04	423	7372.51	423	10798.7	423	8502.46
424	4863.04	424	5788.19	424	6346.74	424	2862.63	424	7817	424	6761.04	424	11850.3	424	10020.9
425	4952.58	425	5373.82	425	7526.35	425	3058.3	425	7784.48	425	5446.18	425	12923.2	425	9826.34
426	5960.53	426	5817.24	426	6426.8	426	3482.62	426	6689.74	426	4502.7	426	12057.3	426	7675.37
427	5174.98	427	5243.34	427	6111.24	427	2766.88	427	5705.39	427	4985.14	427	13000.1	427	8891.85
428	5620.84	428	5308.31	428	6369.7	428	3507.18	428	6230.86	428	5304.21	428	11712.9	428	7190.21
429	5501.02	429	4806.3	429	7180.76	429	4083.2	429	4478.33	429	5729.99	429	11633.2	429	6596.95
430	5927.93	430	4347.95	430	7671.78	430	4321.32	430	4445.65	430	5448.71	430	11897.3	430	6686.86
431	6025.98	431	4348.76	431	7913.18	431	4080.33	431	4628.11	431	4336.78	431	12034.7	431	7804.02
432	4964.56	432	3518.28	432	7145.77	432	3446.47	432	4537.23	432	4864.09	432	11727.9	432	8506.65
433	5262.22	433	3245.89	433	7358.07	433	3495.24	433	4758.83	433	4847.16	433	13080.5	433	11684.7
434	4853.2	434	3168.31	434	7765.79	434	3689.85	434	6360.15	434	6386.94	434	14229.7	434	12373.7
435	4721.61	435	2813.24	435	8661.41	435	4051.66	435	7021.34	435	6942.64	435	14723.5	435	11776
436	4416.24	436	2344.11	436	9729.09	436	4549.98	436	7108.19	436	7624.58	436	13488.5	436	10641.2
437	5229.07	437	2893.43	437	9903.05	437	4772.29	437	6837.42	437	8045.5	437	12285.4	437	10631.1
438	5364.19	438	4092.76	438	9615.36	438	4271.84	438	6203.27	438	8715.86	438	10659.1	438	8940.39
439	4735.35	439	3358.38	439	9042.65	439	3962.49	439	4813.51	439	9200.48	439	11372.1	439	10203.7
440	4759.62	440	3004.15	440	7953.59	440	4678.78	440	4938.69	440	7680.34	440	11180.8	440	10416.4
441	5078.69	441	3739.1	441	7233.44	441	4748.51	441	4344.26	441	6409.14	441	10112.8	441	8241.55
442	6847.36	442	5273.69	442	7683.75	442	3921.17	442	3989.89	442	6185.39	442	11358.7	442	8291.18
443	9359.2	443	6393.48	443	7782.4	443	4952.18	443	3689.25	443	5710.55	443	12025.2	443	8391.99
444	9295.99	444	5438.48	444	8659.49	444	5273.64	444	3987.07	444	6649.72	444	12693.5	444	7975.19
445	8526.05	445	4116.5	445	8151.3	445	4613.74	445	3515.96	445	5812.56	445	12577.5	445	9198.92
446	7137.27	446	3679.09	446	7448.91	446	4245.93	446	3823.81	446	5861.6	446	12964.1	446	11111.5
447	6684.17	447	4521.07	447	6555.1	447	4125.19	447	4312.54	447	6285.89	447	13990.7	447	12733.5
448	6750.01	448	5378.31	448	6184.94	448	3850.37	448	5054.41	448	6054.14	448	14238.6	448	13657.7
449	7956.24	449	5612.99	449	6132.35	449	3725.96	449	6340.71	449	7423.95	449	15062	449	14726.1
450	8267.59	450	6340.63	450	6589.76	450	3758.55	450	7083.2	450	9762.27	450	16617.5	450	16076.4
451	8828.41	451	6797.07	451	6870.46	451	3600.31	451	7582.23	451	10321.8	451	16556.1	451	16251.7
452	7333.12	452	5846.35	452	6373.84	452	4139.93	452	7422.33	452	10645.1	452	12514.1	452	11603.4
453	6811.52	453	4378.79	453	5082.54	453	3278.56	453	6734.87	453	9501.55	453	10354.9	453	9900.82
454	6927.83	454	4091.31	454	6667.21	454	3896.54	454	6344.54	454	8289.21	454	9509.96	454	6203.18
455	7506.66	455	4877.42	455	6462.15	455	4084.46	455	6952.88	455	10026.2	455	9800.81	455	6155.86
456	8500.07	456	6296.9	456	6169.57	456	3775.53	456	7204.75	456	10802.5	456	8195.04	456	3334.69
457	8788.01	457	6868.87	457	5359.39	457	3471.91	457	7513.12	457	11186.9	457	8819.86	457	4108.35
458	7843.29	458	5000.08	458	6933.45	458	3461.88	458	5831.31	458	6665.47	458	8820.28	458	3606.29
459	7029.29	459	4721.49	459	7870.86	459	3952.1	459	5204.36	459	6051.02	459	9347.87	459	4087.15
460	6926.4	460	4548.5	460	7672.93	460	4369.47	460	5367.9	460	6493.77	460	9851.39	460	5289.16
461	6257.1	461	4132.45	461	8807.88	461	4788.62	461	4694.39	461	6115.84	461	9731.25	461	6235.08
462	5934.37	462	4582.26	462	9456.26	462	5571.64	462	4084.1	462	4372.74	462	10031.1	462	6369.64
463	5101.63	463	3462.92	463	9441.1	463	5416.23	463	2718.34	463	3712.11	463	10868.2	463	7936.03
464	5704.25	464	2916.99	464	9113.38	464	5754.52	464	2815.55	464	2810.28	464	11479.2	464	9052.94
465	7283.66	465	2819.8	465	8909.76	465	4851.43	465	3116.77	465	4260.58	465	11966	465	10187.6
466	6333.97	466	2383.32	466	7946.05	466	4519.18	466	2950.99	466	4075.5	466	11449.1	466	9854.09
467	8315.04	467	2920.58	467	10554.3	467	4943.28	467	2715.21	467	2699.62	467	11141.9	467	9445.64
468	7980.29	468	3670.16	468	9827.35	468	3634.85	468	3071.84	468	3508.39	468	10777.3	468	10122.3
469	8299.37	469	3988.03	469	10435	469	4260.29	469	2701.14	469	3739.16	469	11233	469	11678.6
470	8888.59	470	4574.84	470	10670.4	470	5647.15	470	2912.53	470	3373.42	470	10792.6	470	10088.7
471	8837.5	471	5225.94	471	10906.6	471	5147.67	471	3262.4	471	4358.68	471	10125.6	471	7989.45
472	8159.91	472	5698.77	472	9924.74	472	4200.64	472	3775.02	472	3839.76	472	9536.44	472	7844.28
473	8219.03	473	5638.09	473	8226.58	473	4164.16	473	3616.54	473	3333.11	473	9299.4	473	8125.13
474	7557.85	474	6563.46	474	7367.41	474	4925.59	474	3875.89	474	3917.51	474	8860.65	474	8446.52
475	8747.33	475	7348.5	475	10215.2	475	6774.7	475	4803.97	475	4403.05	475	9068.87	475	8679.68
476	9052.95	476	7639.9	476	10121.6	476	6568.06	476	5556.04	476	5110.15	476	7827.31	476	8238.56
477	7631.49	477	5665.17	477	11533.8	477	6310.35	477	5847.07	477	6420.01	477	7509.58	477	7689.47
478	5510.1	478	4309.67	478	12569	478	6095.08	478	5938.56	478	8395.33	478	6968.92	478	7204.71
479	4273.58	479	3220.43	479	12971.7	479	6732.75	479	6096.4	479	7068.79	479	6355.11	479	7062.01
480	4090.97	480	3684.73	480	13277.7	480	6808.88	480	6324.61	480	7558.05	480	6087.4	480	6994.47
481	3898.72	481	3430.8	481	12819.3	481	7150.21	481	6366.98	481	9109.11	481	6537.96	481	5937.33
482	5698.91	482	4541.41	482	14010	482	8086.77	482	6837.11	482	9527.37	482	8101.26	482	9600.88
483	6785.16	483	5862.31	483	9808.5	483	6838.42	483	6572.73	483	9651.47	483	6909.2	483	8440.72
484	8430.9	484	7910.51	484	6469.23	484	3272.04	484	6760.19	484	9747.7	484	7297.71	484	8353.51
485	8006.12	485	6453.18	485	5170.6	485	2177.4	485	6799.39	485	9286.72	485	6451.36	485	4990.21
486	8969.21	486	6188.48	486	5473.63	486	2315.77	486	7318.61	486	8635.26	486	7548.69	486	6687.35
487	8760.74	487	4594.12	487	7490.88	487	3185.5	487	8542.98	487	10224.6	487	7807.9	487	8639.77
488	8163.37	488	3417.74	488	7422.53	488	2914.58	488	9106.55	488	13072.2	488	7430.93	488	8133.51
489	8409.83	489	4006.89	489	10227.8	489	5296.76	489	9564.54	489	13965.4	489	4795.26	489	3761.76
490	8948.95	490	4873.16	490	12363.1	490	6600.71	490	9961.27	490	13660.2	490	5663.84	490	4572.91
491	9818.36	491	6033.06	491	12014.7	491	7584.12	491	10666.3	491	14511.4	491	5112.3	491	3754.06
492	10263.7	492	5841.33	492	12757.9	492	7896.86	492	10860.8	492	14461.1	492	5083.34	492	4682.28
493	9388.81	493	5399.47	493	9052.57	493	7378.98	493	10841.1	493	12638.5	493	5655.17	493	6028.77
494	10203.7	494	6001.27	494	7649.88	494	6803.6	494	10308.4	494	10360.3	494	6473.03	494	6357.29
495	9708.72	495	6452.44	495	8415.56	495	7340.44	495	8489.33	495	5844.92	495	7100.6	495	6389.17
496	9687	496	7727.76	496	5745.08	496	4532.78	496	8783.6	496	6870.2	496	8027.3	496	6413.27
497	9589.08	497	7471.42	497	5559.05	497	2975.3	497	6962.4	497	3955.99	497	8470.7	497	7573.32
498	9910.22	498	7545.56	498	6357.04	498	3422.95	498	6579.47	498	4182.86	498	9537.15	498	8696.17
499	10619.1	499	7966	499	6873.93	499	3268.1	499	4523.06	499	2451.35	499	9864.24	499	9440.02
500	9744.52	500	8293.29	500	10040.9	500	4265.5	500	3168.36	500	884.128	500	9499.91	500	9124.77
501	8425.75	501	6942.51	501	11283.8	501	6319.18	501	3118.64	501	806.364	501	7515.39	501	7204.04
502	8543.73	502	7482.73	502	5204.14	502	4239.48	502	1750.91	502	1051.61	502	6368.06	502	7475.46
503	7433.24	503	6107.89	503	5346.24	503	4713.45	503	1378.76	503	1184.57	503	6591.75	503	7045.63
504	7045.77	504	5821.27	504	5386.64	504	3608.73	504	1841.88	504	1671.56	504	5810.84	504	6546.45
505	7523.97	505	5526.9	505	5475.7	505	2689.62	505	3097.98	505	3270.33	505	6035.56	505	6532.71
506	7520.86	506	4928.93	506	5190.68	506	3639.36	506	2593.43	506	2928.1	506	6127.41	506	7170.42
507	7723.06	507	4387.39	507	4139.88	507	3845.64	507	2460.01	507	2900.73	507	8103.97	507	7906.62
508	9848.58	508	5980.27	508	5466.78	508	5403.79	508	3644.17	508	4116.54	508	8303.01	508	8345.36
509	10675.7	509	7025.53	509	6002.72	509	6577.15	509	3053.8	509	4174.98	509	9722.23	509	8885.64
510	11205.7	510	8382.31	510	5795.1	510	6817.76	510	4047.39	510	5054.3	510	9431.59	510	7410.27
511	10673.7	511	8221	511	8173.97	511	7724.5	511	4234.67	511	5210.94	511	8310.82	511	6313.11
512	10409.5	512	8266.72	512	10065.4	512	8455.63	512	3670.69	512	3709.13	512	7686.39	512	5720.89
513	10478.2	513	7817.62	513	13150.5	513	9619.2	513	4106.71	513	4423.37	513	7764.97	513	6159.58
514	10485.6	514	7983.43	514	13803.2	514	10339.3	514	3809.97	514	3561.05	514	6917.32	514	5967.43
515	10907.8	515	10119	515	12362.4	515	10467.5	515	3060.18	515	3182.68	515	8212.2	515	9824.9
516	11820.8	516	10964.9	516	10575.7	516	9866.44	516	2956.31	516	2876.02	516	9343	516	10227.4
517	10772.1	517	9072.37	517	9856.33	517	8855.76	517	3163.54	517	3297.8	517	9100.71	517	9849.79
518	10792.5	518	9162.22	518	10725	518	6845.69	518	3180.99	518	3414.43	518	8817.84	518	8564.88
519	10203.9	519	8586.9	519	9436.6	519	6850.14	519	3162.03	519	3477.77	519	8129.81	519	8718.18
520	9276.33	520	8263.65	520	9791.94	520	7433.58	520	3375.9	520	3444.15	520	8906.95	520	9248.45
521	9050.49	521	8083.58	521	7050.31	521	5065.49	521	3141.93	521	3012.84	521	9977.22	521	12135.3
522	8399.19	522	7543.03	522	8917.4	522	5797.53	522	3772.17	522	2924.29	522	9352.66	522	10166.3
523	8340.58	523	7317.18	523	7403.8	523	5326.82	523	4082.35	523	2477.54	523	9216.54	523	9200.29
524	8225.44	524	7228.46	524	6978.94	524	4860.32	524	3670.18	524	1670.74	524	9903.3	524	7676.33
525	7672.47	525	7197.03	525	6911.03	525	5727.68	525	3842.8	525	1750.19	525	9110.06	525	7945.63
526	7348.8	526	7223.42	526	6342	526	5188.41	526	4365.03	526	2311.08	526	9948.25	526	8550.73
527	7995.44	527	6865.21	527	6483.45	527	6791.41	527	5220.01	527	2429.2	527	8514.65	527	7015.9
528	7769.01	528	6845.91	528	7075.17	528	6904.56	528	5073.61	528	2090.89	528	7637.93	528	5910.85
529	7845.23	529	7204.9	529	8319.36	529	5986.24	529	5575.44	529	2325.25	529	7132.5	529	5693.6
530	8039.92	530	7593.32	530	7922.64	530	6426.43	530	6291.48	530	3813.02	530	7822.64	530	6828.62
531	6632.12	531	6189.88	531	9488.58	531	5285.88	531	6819.45	531	3779.43	531	9186.47	531	7577.64
532	5069.26	532	4782.7	532	10488.9	532	4526.61	532	8209.55	532	4857.33	532	8944.57	532	6953.56
533	4514.24	533	4187.61	533	14590.1	533	6911.96	533	7516.92	533	4585.42	533	7816.89	533	6430.25
534	5633.52	534	5247.62	534	16385.2	534	8334.1	534	8811.61	534	7075.19	534	6672.86	534	6022.58
535	5294.16	535	4099.43	535	19600.9	535	11415.1	535	8226.31	535	6255.94	535	7354.22	535	5925.03
536	5872.46	536	5239.44	536	22223.3	536	12995.1	536	9260.94	536	9601.56	536	6045.81	536	4591.82
537	4967.31	537	5021.1	537	25912.3	537	12635.3	537	8938.73	537	10721.8	537	4740.56	537	3961.09
538	6539.18	538	6182.47	538	26878.4	538	13974.8	538	9138.9	538	11106.8	538	5512.06	538	5152.29
539	7208.39	539	6154.88	539	29772.6	539	15232.3	539	7953.52	539	7122.11	539	6204.67	539	6285.62
540	6914.5	540	5659.72	540	27199.9	540	14636.4	540	8917.96	540	8262.48	540	4966.3	540	5989.98
541	5614.67	541	5595.44	541	26137.9	541	15198.6	541	8863.71	541	7422.95	541	4925.94	541	5596.18
542	5786.43	542	5631.03	542	27428.2	542	16299.4	542	8471.31	542	8041.65	542	5519.29	542	4718.85
543	5157.66	543	4748.19	543	23940.4	543	15215.5	543	7162.7	543	7169.66	543	6415.6	543	4634.16
544	5123.7	544	4990.32	544	22480.1	544	13199.7	544	5981.64	544	5645.69	544	7617.1	544	5735.92
545	5781.11	545	6170.85	545	19889	545	11537.8	545	6856.63	545	6195.64	545	7996.99	545	6552.04
546	6379.52	546	6705.39	546	17913.7	546	10420.9	546	6494.04	546	5703.28	546	8785.44	546	7279.95
547	6572.21	547	6161.42	547	16169.2	547	8988.14	547	6886.27	547	5061	547	9646.78	547	8348.1
548	6755.2	548	6034.18	548	15321.8	548	9130.94	548	8164.44	548	6998.55	548	12135.6	548	12576.3
549	7191.05	549	6014.23	549	14476.5	549	9605.25	549	8629.99	549	8595.71	549	10802.3	549	10046.2
550	7001.82	550	5595.31	550	13886.3	550	9334.77	550	8312.97	550	8482.61	550	10428.4	550	8620.68
551	6267.45	551	5154.2	551	13516.3	551	9249.44	551	7329.85	551	7425.32	551	10652.9	551	9616.52
552	5460.58	552	4519.78	552	12286.6	552	9146.84	552	7465.12	552	7077.06	552	8720.23	552	8292.66
553	5747.68	553	4451.02	553	11766.8	553	9389.85	553	6543.81	553	7148.53	553	8444.53	553	8016.5
554	7285.63	554	6227.58	554	11364.6	554	8424.84	554	6318.43	554	8598.36	554	6906.29	554	6547
555	6856.04	555	5457.1	555	11889.2	555	8473.84	555	6294.71	555	10188.5	555	6152.82	555	6604.16
556	7054.59	556	5219.01	556	11628	556	9763.85	556	6213.35	556	9926.11	556	6343.44	556	6152.34
557	6765.04	557	5320.49	557	11692.7	557	7794.43	557	5946.88	557	9059.74	557	7687.62	557	7831.5
558	6226.81	558	4739.16	558	11925.3	558	6495.51	558	6283.1	558	9573.62	558	9163.8	558	8293.14
559	5832.07	559	4324.43	559	11075.4	559	6761.31	559	6068.76	559	10803.5	559	9954.69	559	9936.37
560	6064.46	560	4561.08	560	14239.7	560	7335.66	560	5055.26	560	8659.01	560	11338.6	560	12260.6
561	6232.19	561	5913.6	561	14596	561	8158.09	561	5851.51	561	9665.1	561	11231.2	561	11921.4
562	5829.69	562	6240.83	562	15058.2	562	8885.28	562	6244.21	562	7754.62	562	10867.7	562	11737.9
563	5053.98	563	5153.18	563	15750.7	563	8942.6	563	5797.73	563	5363.31	563	9963.41	563	9958.58
564	4532.1	564	4250.87	564	18813.5	564	8935.11	564	5377.57	564	4997.35	564	8706.84	564	7998.71
565	4790.26	565	4495.9	565	22331.1	565	12434.2	565	6018.4	565	4989.95	565	8535.77	565	7189.58
566	5621.64	566	4542.49	566	24875.2	566	14130.5	566	6021.48	566	4274.42	566	9072.83	566	7572.81
567	5869.76	567	4147.4	567	25771	567	13377.5	567	6179.03	567	4881.29	567	10120.5	567	7805.29
568	6021.24	568	3514.97	568	25544	568	12531.7	568	6246.24	568	6266.05	568	11153.3	568	8666.31
569	6047.57	569	3996.19	569	24648	569	11399.7	569	6312.4	569	6909.8	569	13719	569	12535.1
570	7499.34	570	5033.44	570	24876.2	570	11565.4	570	5002.71	570	4984.97	570	15102.9	570	14529.5
571	6396.95	571	4273	571	25282.8	571	12158.4	571	4710.34	571	5247.1	571	15875.7	571	15747.7
572	5690.49	572	3507.02	572	24662.7	572	12891.8	572	4911.79	572	6121.16	572	15561.5	572	14845.9
573	3478.6	573	1853.62	573	24165.4	573	13421.3	573	5282.71	573	6188.57	573	15369.1	573	13306.1
574	3990	574	1785.89	574	22334	574	13644.9	574	6049.58	574	7967.3	574	13199.4	574	8190.01
575	2169.55	575	916.001	575	21527	575	13558.3	575	6211.71	575	9103.41	575	11373.1	575	6656.55
576	2608.51	576	1310.45	576	15949.3	576	11086.8	576	6523.86	576	9651.15	576	9713.43	576	5252.48
577	2428.12	577	1645.74	577	16754.3	577	10988.1	577	7068.04	577	11479.9	577	8215.82	577	3328.31
578	4230.82	578	2848.31	578	16058.1	578	11756.6	578	7809.39	578	12051.3	578	7638.88	578	2549.93
579	3600.93	579	2372.45	579	16744.5	579	12449.7	579	8129.76	579	10691.2	579	8271.73	579	3535.25
580	5440.95	580	3752.61	580	15659.5	580	10414.4	580	7664.64	580	10617.2	580	7908.91	580	4533.41
581	5067.4	581	4287.36	581	15298.3	581	9669.04	581	7941.71	581	10996.3	581	7743.94	581	5340.86
582	7372.42	582	7202.21	582	15142.3	582	10244.4	582	7766.24	582	10395.2	582	7816.51	582	7169.22
583	6281.07	583	6126.79	583	14337.5	583	8849.48	583	7882.62	583	11817.6	583	8753.89	583	8606.37
584	6367.26	584	5636.98	584	14206.3	584	9111.1	584	7292.29	584	11320	584	9963	584	11015.4
585	5837.2	585	5994.82	585	14833.9	585	9419.67	585	7718.44	585	12799.1	585	10238	585	12741.9
586	5838.05	586	5984	586	14175.7	586	9127.97	586	7488.46	586	12266.8	586	10913.1	586	11892.5
587	5617.26	587	4902.09	587	12502.6	587	8296.66	587	6971.61	587	11338.9	587	11178.3	587	10412.8
588	5532.62	588	4580.42	588	10511.5	588	7703.33	588	6146.09	588	10415.1	588	10468.1	588	8844.19
589	6518.25	589	4762.56	589	8608.05	589	6497.45	589	6228.13	589	11338.3	589	8759.49	589	6779.58
590	6569.75	590	4773.61	590	7562.55	590	5936.55	590	6025.61	590	11597.1	590	6807.01	590	5272.13
591	7167.99	591	5320.44	591	7989.12	591	6352.1	591	7114.27	591	12008.4	591	7140.7	591	5426.41
592	7633.77	592	6769.01	592	8200.01	592	5890.8	592	8618.21	592	12632.2	592	7188.13	592	5044.79
593	7187.98	593	6712.66	593	8604.93	593	5253.34	593	8831.47	593	13661	593	7690.18	593	5469.6
594	8479.47	594	6693.33	594	9082.05	594	5672.87	594	8937.32	594	13555.6	594	8478.62	594	6666.81
595	9014.22	595	5249.39	595	8404.14	595	5464.19	595	8568.51	595	12947.6	595	10023.3	595	7379.35
596	8735.74	596	4527.3	596	8374.32	596	6062.2	596	6680.99	596	11337.4	596	10094.6	596	6934.47
597	7391.81	597	2937.68	597	8781.55	597	6581.43	597	7368.95	597	11567.1	597	10194	597	6559.91
598	5031.72	598	3010.34	598	9006.05	598	6929.74	598	5777.85	598	9334.53	598	9230.81	598	5268.46
599	3006.13	599	2699.94	599	10359.8	599	6471.61	599	6337.77	599	9061.6	599	7754.51	599	4120.55
600	1570.09	600	1476.52	600	10993	600	6445.23	600	6626	600	8391.84	600	7882.39	600	4895.22
601	783.105	601	870.525	601	11315.5	601	6851.46	601	4440.04	601	5964.33	601	7994.73	601	6553.12
602	1811.9	602	1443.8	602	10055.6	602	7760.32	602	5131.91	602	6862.73	602	8452.17	602	7909.56
603	3040.78	603	2379.21	603	8742.01	603	7344.17	603	4596.51	603	6626.79	603	9582.12	603	9367.15
604	2972.17	604	2700.44	604	11477.3	604	8057.11	604	3503.28	604	5121.18	604	10751.3	604	9778.98
605	3780.69	605	3443.03	605	11116.8	605	8170.35	605	4080.29	605	5669.31	605	10662.8	605	7723.66
606	4466.87	606	4934.17	606	11923.1	606	6707.92	606	2475.28	606	3219.44	606	10976.7	606	8103.3
607	7125.1	607	6079.36	607	12520.5	607	7643.57	607	2550.1	607	3239.93	607	11159.2	607	7460.84
608	8594.56	608	6080.4	608	12831.9	608	7224.45	608	3168.98	608	3890.63	608	11779.6	608	6488.09
609	5493.67	609	3870.93	609	13034.4	609	7425.53	609	4702.62	609	4691.43	609	12904.9	609	8171.28
610	6526.2	610	4889.33	610	12413.3	610	6877.32	610	5613.36	610	4877.04	610	12031.4	610	7282.27
611	4393.23	611	3549.03	611	10803.8	611	6159.44	611	6968.24	611	5905.85	611	11966.1	611	6873.15
612	6752.73	612	6114.14	612	11326.1	612	4726.25	612	7072.73	612	6426.39	612	12372.9	612	7688.38
613	8292.73	613	7174.76	613	9164.71	613	5334.39	613	6297.23	613	6656.06	613	13290.2	613	7468.19
614	11010.7	614	9264.21	614	7517.64	614	4883.96	614	6817.24	614	6858.49	614	12509.5	614	8483.15
615	9037.2	615	7753.16	615	8640.8	615	5128.6	615	5927.92	615	6648.75	615	13887.3	615	7973.66
616	10920.5	616	9888.34	616	7733.41	616	4693.12	616	6536.07	616	7299.42	616	13535.5	616	9089.93
617	12869.3	617	11157.6	617	8377.13	617	5167.7	617	5658.54	617	5473.12	617	13191.2	617	9859.92
618	14142	618	11681.4	618	7228.53	618	4879.81	618	6444.04	618	5405.86	618	12035.4	618	7611.37
619	15511.5	619	11228.6	619	8287.58	619	4697.67	619	6459.37	619	5206.53	619	11107.7	619	6235.3
620	17207	620	10341.7	620	5770.24	620	4336.07	620	6607.69	620	5278.47	620	9246.24	620	5377.44
621	17850.3	621	10377.8	621	8252.81	621	7160.18	621	6869.11	621	5926.62	621	6090.22	621	3652.34
622	17538	622	10569.4	622	7456.65	622	5854.75	622	6057.87	622	6586.48	622	4323.28	622	2881.41
623	18463.7	623	12659.2	623	7587.03	623	6295.39	623	5658.61	623	6018.21	623	3294.7	623	2565.85
624	18458.6	624	12553.8	624	7352.32	624	6064.95	624	5464.64	624	6094.31	624	2437.95	624	1865.12
625	18784.6	625	11871.8	625	7934.29	625	5993.86	625	5899.94	625	6660.39	625	2206.27	625	1815.45
626	18434.4	626	9780.51	626	7189.06	626	5334.02	626	6844.24	626	7783.3	626	2534.05	626	2166.84
627	16514	627	8254.63	627	7738.88	627	5208.85	627	7976.12	627	8421.77	627	3390.6	627	2412.65
628	17812.3	628	9784.76	628	7708.39	628	6554.96	628	7811.73	628	9355.24	628	3949.55	628	1744.97
629	19051.3	629	11587.4	629	6167.23	629	5851.22	629	8095.66	629	9020.64	629	4191.54	629	1570.24
630	17514.6	630	9892.61	630	6573.05	630	5882.99	630	7650.37	630	8335.76	630	5081.31	630	2603.24
631	17096.1	631	9226.69	631	6935.26	631	6184.93	631	8909.56	631	9574.52	631	5582.72	631	2908.87
632	16900.2	632	9465.67	632	7805.14	632	7000.75	632	8740.35	632	8110.15	632	6262.81	632	3119.91
633	15724.5	633	7215	633	7416.58	633	4724.37	633	8272.61	633	6832.89	633	6534.8	633	3174.24
634	15107.9	634	6843.12	634	7800.5	634	4692.81	634	7607.38	634	6646.8	634	6390.67	634	3538.35
635	13265.1	635	6687.03	635	6727.04	635	4016.28	635	8958.35	635	10888.4	635	5756.69	635	4313.67
636	12673.6	636	6673.69	636	7353.28	636	3548.24	636	8140.09	636	9711.03	636	6176.66	636	4556.26
637	11682.4	637	6553.31	637	6888.96	637	4627.08	637	8448.12	637	11019.3	637	6395.25	637	5438.14
638	11177.9	638	5775.63	638	7423.47	638	4430.13	638	9277.17	638	11877	638	6770.76	638	6109.92
639	10936.6	639	5561.72	639	6903.94	639	3607.18	639	9606.78	639	11374.3	639	6774.89	639	6097.19
640	12549.3	640	6406.34	640	7039.49	640	3857.4	640	10668.6	640	12185.8	640	6483.6	640	4892.68
641	10017.6	641	6111.67	641	6570.12	641	3835.64	641	10537.4	641	10422.5	641	6599.09	641	3479.03
642	9520.22	642	4877.8	642	5787.52	642	4137.28	642	10575.1	642	9904.1	642	7478.02	642	3645.75
643	7697.88	643	4240.21	643	5589.99	643	4450.88	643	12996.8	643	12272.3	643	7994.97	643	4259.88
644	7343.68	644	4822.29	644	7238.06	644	5242.56	644	11613.4	644	10646.4	644	9015.47	644	5823.03
645	7171.96	645	4167.47	645	7343.05	645	5023.15	645	12784.8	645	11390	645	8366.54	645	6667.81
646	8067.98	646	5306.84	646	7337.26	646	4027.9	646	12406.8	646	10935.5	646	7768.46	646	5486.78
647	8733.27	647	7127.59	647	7979.55	647	4123.97	647	12817.3	647	11031.7	647	7726.76	647	5108.27
648	10109.4	648	9356.06	648	7370.77	648	4405.34	648	13070.2	648	11140.8	648	7595.19	648	4939.55
649	8714.38	649	8509.65	649	7923.19	649	4615.81	649	14394.6	649	12250.4	649	7458.46	649	4987.27
650	6326.7	650	6253.18	650	7871.24	650	4460.58	650	12303.2	650	11179.8	650	7473.39	650	5318.64
651	5591.27	651	5901.68	651	7141.61	651	4173.57	651	13106.6	651	11850.9	651	7811.26	651	7090.67
652	5013.94	652	5021.18	652	7400.55	652	4214.8	652	9570.77	652	7162.79	652	8616.64	652	9953.46
653	5529.12	653	5058.44	653	4221.21	653	1594.18	653	9151.14	653	7380.22	653	8394.64	653	8444.67
654	5938.85	654	5487.58	654	3089.07	654	1710.86	654	8896.88	654	8691.38	654	8951.68	654	10219.4
655	5896.13	655	5070.04	655	3352.87	655	1948.02	655	8384.69	655	9049.02	655	8598.09	655	9563.11
656	4678.11	656	3992.36	656	3614.05	656	2163.76	656	7356.62	656	7648.65	656	8783.31	656	9210.91
657	4545.36	657	3399.51	657	1803.74	657	735.538	657	6114.3	657	6278.15	657	9569.02	657	8894.16
658	4364	658	3456.3	658	2057.73	658	1634.05	658	5612.49	658	5894.47	658	9114.68	658	9203.33
659	4265.97	659	3712.26	659	4158.51	659	1672.12	659	5431.71	659	5422.98	659	9042.43	659	8833.29
660	2594.63	660	2521.95	660	5489.02	660	1904.06	660	5515.88	660	5719.88	660	8705.11	660	7534.95
661	2800.5	661	2423.79	661	5524.79	661	2899.35	661	5276.92	661	6248.78	661	7635.13	661	6628.63
662	2367.38	662	2219.43	662	5924.2	662	2835.84	662	5662.62	662	7509.26	662	7662.1	662	5424.82
663	3485.61	663	2976.27	663	6513.72	663	3273.21	663	6162.5	663	8515.5	663	8060.63	663	6424.77
664	4001.74	664	3235.08	664	6175.36	664	4683.17	664	6373.89	664	8509.22	664	8322.13	664	6799.63
665	4253.44	665	3096.08	665	5364.24	665	4428.42	665	6447.89	665	7588.56	665	8962.12	665	7394.36
666	5808.74	666	3818.58	666	5731.67	666	4980.82	666	6206.01	666	6463.78	666	9532.63	666	7508.09
667	7236.52	667	3689.89	667	5899.82	667	3560.03	667	5378.83	667	6510.12	667	8992.41	667	6281.55
668	7516.54	668	3661.5	668	7402.33	668	4712.62	668	5478.72	668	5961.72	668	7583.36	668	4137.16
669	7143.71	669	3596.42	669	6605.92	669	4272.04	669	6125.98	669	7259.69	669	7235.85	669	2965.21
670	6988.84	670	5354.85	670	6887.83	670	3506.42	670	6661.15	670	8127.27	670	6749.42	670	3094.84
671	6473.01	671	4935.91	671	8170.28	671	4320.11	671	7489.24	671	9720.29	671	6281.9	671	3629.38
672	7141.22	672	5627.6	672	9397.99	672	4928.69	672	8602.39	672	12794.5	672	6753.81	672	3343.41
673	6911.01	673	5337.19	673	9093.3	673	4407.37	673	8567.42	673	16876.4	673	6354.7	673	3355.83
674	6000.83	674	4261.35	674	7608.97	674	3894.7	674	8349.37	674	18762	674	6915.73	674	3958.85
675	5531.84	675	4037.65	675	7315.53	675	2710.84	675	8266.68	675	16998.5	675	8295.01	675	5577.24
676	5762.36	676	4065.9	676	5193.09	676	3317.4	676	7837.82	676	16191.1	676	9357.06	676	8284.37
677	4825.28	677	3824.96	677	6092.13	677	4531.58	677	7092.51	677	13867.3	677	11018	677	8719.08
678	4113.29	678	3156.8	678	6543.68	678	4521.27	678	5873.08	678	9938.33	678	10814.3	678	9583.14
679	6062.27	679	4467.76	679	6926.23	679	5040.58	679	5850.93	679	9421.47	679	11393.9	679	10176.6
680	5582.05	680	4370.14	680	9481.13	680	7892.05	680	6395.97	680	11720.3	680	10218.4	680	10967.2
681	6344.2	681	5508.59	681	10383.7	681	6912.96	681	8158.67	681	14995	681	9597.47	681	9807.85
682	6504.35	682	5641.02	682	9640.23	682	6331.61	682	7695.64	682	14694	682	9709.55	682	8694.07
683	6503.69	683	6333.56	683	7889.41	683	5146.57	683	8213.36	683	12459.7	683	10995.8	683	9477.42
684	7407.98	684	7829.74	684	5981.82	684	4035.27	684	8070.56	684	14318.8	684	12252	684	9473.48
685	7033.67	685	7885.35	685	4661.88	685	3711.14	685	7553.41	685	12030.8	685	10048.8	685	10145.8
686	6706.74	686	7014.33	686	4215.67	686	4649.93	686	7118.92	686	11376.5	686	8385.38	686	8411.54
687	6603.78	687	7713.04	687	6527.1	687	5522.18	687	7626.33	687	12805.3	687	7007.02	687	6417.03
688	5848.06	688	6365.81	688	6806.8	688	4252.08	688	8381.97	688	13513.8	688	6459.99	688	5530.73
689	4149.72	689	4577.57	689	7863.26	689	4042.47	689	8210.55	689	12339.7	689	6172.76	689	5024.77
690	4903.37	690	4374.77	690	9901.03	690	4982.4	690	8261.64	690	9643.33	690	6721.09	690	6725.22
691	6474.07	691	5818.26	691	11064.8	691	5291.97	691	9299.99	691	12349.8	691	6189.51	691	6173.3
692	6081.01	692	5543.1	692	11219.5	692	6414.92	692	8192.38	692	8834.48	692	5464.08	692	6019.02
693	7360.05	693	7866.04	693	10371.5	693	6076.1	693	6588.36	693	4781.78	693	6760.07	693	8704.63
694	6654.24	694	7627.08	694	8302.94	694	5950.17	694	5809.18	694	5636.43	694	7578.1	694	9274.19
695	6496.02	695	7760.62	695	9744.5	695	5232.71	695	6127.65	695	9758.35	695	8390.18	695	11231.6
696	7562.15	696	7437.26	696	9131.39	696	5707.63	696	7484.26	696	13584.3	696	9629.09	696	11121.6
697	7465.85	697	7236.09	697	9740.97	697	5519.46	697	6852.53	697	11388.2	697	8863.05	697	12809.5
698	6968.69	698	7663.83	698	9028.49	698	5127.04	698	6129.35	698	8524.07	698	8024.28	698	11163.6
699	6862.5	699	5958.63	699	7881.68	699	4662.43	699	6014.34	699	9361.7	699	8247.07	699	9256.77
700	6143.2	700	4713.55	700	7808.64	700	4362.31	700	6957.13	700	12710.1	700	7112.82	700	8424.45
701	6044.84	701	3963.24	701	6352.85	701	4003.42	701	5859.77	701	9824.77	701	7161.26	701	6691.29
702	5729.15	702	3415.36	702	5597.16	702	3210.38	702	6054.04	702	10978.6	702	5608.68	702	4784.65
703	6153.42	703	3741.32	703	5561.59	703	3832.35	703	5112.66	703	7342.18	703	6752.92	703	5905.11
704	7512.27	704	4992.55	704	5571.4	704	2930.37	704	4372.7	704	7405.74	704	7239.07	704	6411.89
705	8116.76	705	7225.37	705	6568.8	705	3990.44	705	2563.25	705	3736.35	705	7185.97	705	6200.31
706	8597.35	706	7051.76	706	5962.51	706	3628.6	706	2670.07	706	4595.61	706	7596.13	706	5977.56
707	9884.57	707	7727.76	707	6265.23	707	4183.12	707	2662.19	707	4190.69	707	7464.43	707	5869.62
708	8357.9	708	7127.42	708	6211.54	708	5155.98	708	3497.03	708	6500.39	708	7496.41	708	4924.07
709	6414.45	709	5380.66	709	5491.22	709	4140.52	709	5961.2	709	12195.9	709	7776.11	709	5197.19
710	8049.29	710	6234.91	710	5853.74	710	4338.97	710	4669.98	710	9910.89	710	8657.93	710	5268.08
711	8085.17	711	7241.77	711	6393.83	711	4249.37	711	7036.55	711	15151.9	711	10039.9	711	5907.2
712	5869.08	712	5006.64	712	6351.5	712	2755.44	712	7538.75	712	13289.6	712	11422.7	712	5898.8
713	6148.4	713	5324	713	5158.24	713	2659.04	713	6639.29	713	10152	713	10361.6	713	6899.98
714	7379.33	714	6093.07	714	5356.59	714	2828.26	714	6250.92	714	9279.73	714	9121.71	714	6423.98
715	7136.36	715	4900.84	715	5024.87	715	2862.9	715	5617.37	715	8462.31	715	9157.42	715	7342.53
716	7666.66	716	5055.59	716	4883.26	716	2807.22	716	4848.18	716	7107.39	716	9320.61	716	7026.4
717	8820.41	717	6267.64	717	4253.31	717	2749.57	717	3668.54	717	6172.97	717	8477.62	717	6874.95
718	7849.49	718	5560.7	718	4873.02	718	3434.99	718	4314.25	718	5989.4	718	7928.25	718	6846.76
719	7495.99	719	4830.01	719	4696.81	719	3121.16	719	4537.9	719	6776.56	719	8619.53	719	6709.71
720	7091.81	720	4632.95	720	4207.85	720	3054.48	720	3760.13	720	6171.57	720	10513.4	720	5858.19
721	5898.38	721	2797.32	721	4569.47	721	3870.19	721	4056.58	721	6142.54	721	11186.4	721	6202.73
722	6909.35	722	4714.69	722	5935.94	722	4570.64	722	4341.36	722	6546.1	722	10799	722	6616.65
723	7778.49	723	5176.92	723	6925.57	723	4178.48	723	4006.88	723	6259.89	723	9409.39	723	6969.71
724	7658.01	724	5331.68	724	7703.86	724	4467.02	724	3678.89	724	6106.54	724	8339.81	724	5660.79
725	6982.75	725	3865.28	725	7286.37	725	4314.89	725	3562.09	725	6269.01	725	6878.68	725	5005.21
726	6474.71	726	3582.97	726	6043.52	726	3937.35	726	4119.45	726	6737.13	726	5762.86	726	4230.14
727	6298.23	727	3993.03	727	5060.41	727	2944.03	727	4537.01	727	7122.97	727	5906.61	727	6204.07
728	5923.66	728	4354.64	728	4674.98	728	3390.64	728	4361.85	728	5581.08	728	5874.39	728	4629.08
729	6707.45	729	6262.98	729	5038.86	729	3283.43	729	5635.52	729	6554.11	729	6496.27	729	4484.28
730	6083.58	730	5655.95	730	4831.94	730	2731.24	730	4916.58	730	6118.12	730	6660.2	730	6138.45
731	5730.87	731	5386.81	731	4167.07	731	2592.27	731	4867.68	731	5766.7	731	6666.57	731	5733.46
732	5328.38	732	5797.01	732	4149.68	732	2785.99	732	4814.93	732	6006.42	732	7114.24	732	5052.6
733	5290.58	733	5880.4	733	3958.71	733	2761.14	733	3991.34	733	4482.2	733	9123.04	733	6421.52
734	5122.82	734	5310.3	734	4120.05	734	3268.31	734	3649.2	734	4270.7	734	9348.09	734	6769.47
735	5374.32	735	4818.83	735	4270.36	735	2568.45	735	3757.7	735	4808.15	735	9982.56	735	6850.9
736	6173.46	736	6243.28	736	4123.32	736	2730.98	736	3048.77	736	2984.62	736	12021	736	9402.62
737	5726.02	737	5408.78	737	4573.52	737	2467.52	737	3405.29	737	2016.05	737	11691.7	737	8439.5
738	5349.67	738	5298.33	738	4471.29	738	3470.52	738	2247.05	738	301.769	738	11708.6	738	10365.4
739	5126.62	739	5496.32	739	4732.86	739	3502.07	739	2192.51	739	1418.26	739	10666.9	739	10406.6
740	5043.77	740	5769.86	740	5261.08	740	3361.76	740	2138.72	740	1085.07	740	7341.93	740	5968.22
741	5121.97	741	5770.9	741	3719.14	741	3182.38	741	1923.72	741	1347.53	741	6636.5	741	4472.47
742	5254.61	742	4389.86	742	3843.39	742	3067.86	742	1966.17	742	865.811	742	6708.06	742	4640.18
743	6008.93	743	5192.24	743	4163.41	743	2984.02	743	2454.97	743	1017.44	743	7298.99	743	5736.56
744	6542.68	744	4188.75	744	4126.66	744	3236.98	744	2480.26	744	1641.08	744	7498.98	744	5748.49
745	5987.55	745	3511.09	745	3497.03	745	3638.05	745	2309.8	745	2285.38	745	8275.07	745	8211.85
746	6410.62	746	3255.82	746	3095.55	746	3496.31	746	2056.47	746	1802.49	746	8855.87	746	8124.71
747	6898.74	747	3831.23	747	2613.25	747	2992.32	747	1190.39	747	914.915	747	9619.16	747	9064.89
748	6224.27	748	3810.92	748	2633.32	748	2786.74	748	1155.6	748	1716.44	748	10519.2	748	10535
749	6071.37	749	3509.86	749	3243.39	749	2174.09	749	1323.48	749	1264.34	749	11299.4	749	10849.1
750	7219.79	750	3971.63	750	3879.11	750	2072.2	750	943.534	750	1044.98	750	11407.8	750	9666.56
751	8631.42	751	5965.27	751	5131.46	751	3135.7	751	1601.7	751	1329.35	751	11700.2	751	11254.8
752	9606.04	752	6379.85	752	5862.41	752	3357.61	752	2062.78	752	1231.37	752	12117	752	13635.8
753	9150.18	753	7765.08	753	7050.29	753	3391.69	753	2819.55	753	1692.55	753	12051.2	753	13319
754	9985.23	754	9573.39	754	6984.38	754	3131.18	754	3158.2	754	2722.6	754	11916.9	754	12934.2
755	9691.28	755	10069	755	5177.14	755	3034.69	755	4315.19	755	3717.24	755	9192.29	755	9547.55
756	8977.57	756	9118.97	756	5734.78	756	2808.71	756	3832.59	756	4099.82	756	9784.58	756	9395.29
757	9069.56	757	9278.46	757	5395.96	757	2528.36	757	5066.69	757	5652.55	757	7051.76	757	5635.28
758	8960.5	758	9183.88	758	5644.48	758	2056.02	758	6271.34	758	8229.84	758	7412.19	758	6030.7
759	8171.14	759	8072.34	759	5302.32	759	2279.04	759	5382.02	759	7767.3	759	7934.14	759	5702.61
760	9147.89	760	8945.09	760	5278.54	760	3070.43	760	4526.07	760	6324.82	760	7448.67	760	5005.07
761	9617.07	761	8494.43	761	5644.22	761	4062.24	761	4107.15	761	6913.55	761	6750.09	761	3468.81
762	8802.8	762	7021.71	762	4916.12	762	3897.7	762	3850.54	762	6945.37	762	6221.28	762	3304.12
763	6636.99	763	6076.54	763	5024.54	763	3252.19	763	3615.39	763	6166.76	763	6421.92	763	3269.08
764	4390.06	764	4859.23	764	4853.96	764	3292.3	764	3143.91	764	5797.95	764	6514.99	764	4823.97
765	3540.77	765	3020.95	765	4911.5	765	2961.72	765	3088.35	765	6078.35	765	6389.98	765	5351.17
766	3804.15	766	2577.51	766	3370.1	766	3575.06	766	2953.68	766	5281.61	766	5647.55	766	4448.36
767	3691.02	767	2668.68	767	2908.79	767	4293.06	767	3084.81	767	5199.14	767	5874.91	767	3842.55
768	4652.57	768	3104.69	768	3512.01	768	4767.1	768	3187.43	768	4740.33	768	6916.71	768	4296.17
769	5524.82	769	3616.96	769	3103.27	769	3249.72	769	3953.88	769	5557.02	769	7844.28	769	4858.6
770	6691.08	770	4345.05	770	4292.01	770	2415.11	770	5135.09	770	6866.85	770	7026.38	770	5588.7
771	5825.86	771	4271.7	771	4705.88	771	2844.92	771	7102.62	771	9637.5	771	6104.69	771	5444.12
772	4309.51	772	3691.5	772	6128.69	772	3159.98	772	8596.63	772	11209.1	772	5766.37	772	4506.97
773	3297.24	773	2782.39	773	5664.06	773	3310.51	773	9015.3	773	11590.3	773	6130.14	773	4586.14
774	2709.28	774	2489.89	774	5003.31	774	3953.75	774	8915.7	774	11102.3	774	5766.88	774	4369.6
775	2965.61	775	2323.43	775	4246.79	775	3664.13	775	6780.58	775	8870.74	775	6551.92	775	3999.22
776	3585.72	776	2775.69	776	5912.79	776	3801.36	776	7071.31	776	8620.74	776	7464.95	776	4132.81
777	4242.36	777	2710.28	777	6524.86	777	3699.43	777	8208.58	777	9222.56	777	8417.82	777	5283.22
778	4314.88	778	2999.86	778	7641.52	778	4616.42	778	8786.02	778	10649.4	778	9830.05	778	6686.8
779	4137.1	779	2462.88	779	7511.16	779	4137.47	779	8883.63	779	13029.5	779	10475.1	779	9271.32
780	5546.12	780	4526.31	780	7266.41	780	4853.76	780	8116.06	780	13447.6	780	9175.86	780	9788.17
781	5564.2	781	5082.07	781	8327.64	781	5703.64	781	6617.02	781	10588.1	781	8565.43	781	9169.64
782	5476.34	782	4451.84	782	8101.57	782	5689.81	782	6305.46	782	7419.24	782	8609.42	782	8384.91
783	4663.2	783	2949.18	783	6380.58	783	5927.38	783	5914.14	783	6058.85	783	9172.86	783	8219.29
784	4059.62	784	2021.94	784	7646.93	784	6457.24	784	5779.75	784	6377.02	784	8930.25	784	7076.18
785	2952.89	785	986.707	785	4965.34	785	5375.03	785	5798.7	785	5529.06	785	9237.5	785	7577.81
786	2604.25	786	1177.02	786	4935.25	786	4427.66	786	5533.34	786	4774.94	786	9713.07	786	8643.4
787	1634.16	787	538.212	787	3957.34	787	3160.83	787	5550.65	787	5428	787	9103.86	787	7343.17
788	1486.71	788	708.478	788	4136.35	788	2230.02	788	5269.55	788	5792.71	788	9693.31	788	8178.97
789	1652.24	789	1241.82	789	4975.18	789	2952.06	789	5002.29	789	5321.75	789	9507.46	789	7760.72
790	3227.71	790	2113.11	790	6353.25	790	3597.33	790	5210.93	790	5645.7	790	10129.2	790	8120.32
791	4073.85	791	2200.92	791	7179.44	791	3654.07	791	5187.74	791	5829.55	791	9931.17	791	9629.24
792	4666.2	792	3092.84	792	8344.78	792	4504.5	792	4635.91	792	5505.03	792	8667.21	792	10025.9
793	4682.91	793	3667.84	793	8080.52	793	3976.28	793	4446.33	793	7540.39	793	8966.96	793	6853.73
794	5042.55	794	3764.09	794	8257.72	794	4851.3	794	4494.58	794	6489.89	794	9621.09	794	7832.37
795	5582.07	795	4029.15	795	7552.58	795	3750.47	795	5002.74	795	5968.06	795	11025.7	795	9533.03
796	5023.76	796	4500.67	796	7456.69	796	3995.97	796	6143.58	796	6908.13	796	10400.2	796	8590.9
797	5083.47	797	4364.66	797	6915.48	797	3595.38	797	6695.93	797	8747.65	797	10962.2	797	10094.2
798	4260.06	798	3033.13	798	6995.07	798	2811.17	798	6405.52	798	9402.47	798	9887.06	798	9175.74
799	4694.51	799	3167.94	799	6240.21	799	2495.94	799	7052.82	799	10588.1	799	10845.3	799	9438
800	4925.05	800	2934.36	800	5849.19	800	2045.82	800	6160.76	800	11294.7	800	11611.7	800	8333.89
801	3666.37	801	1652.25	801	6862.6	801	2585.1	801	6153.54	801	11036.2	801	10310.6	801	8220.56
802	3249.79	802	2102.94	802	6450.26	802	2609.48	802	6105.76	802	10033.8	802	9818.45	802	7554.76
803	4528.66	803	2786.57	803	6990.82	803	3039.12	803	7883.83	803	12628.4	803	10422.6	803	7196.05
804	5354.85	804	3099.25	804	6944.63	804	3525.53	804	7623.02	804	11780.6	804	10936.2	804	8641.98
805	7400.71	805	5184.92	805	6858.91	805	3215.15	805	6812.08	805	10402.6	805	10942.2	805	8801.57
806	7830.16	806	6074.77	806	6780.87	806	3352.53	806	7113.27	806	10711	806	12031.2	806	10440
807	8835.61	807	6530.56	807	6544.82	807	4410.14	807	7324.7	807	11042.3	807	12249.2	807	12334.7
808	7362.05	808	6420.11	808	6125.63	808	3964.2	808	7794.28	808	10984	808	13350.6	808	13409.4
809	6183.92	809	4619.04	809	5881.81	809	4696.97	809	7144.86	809	8665.78	809	12768.9	809	12177.1
810	6919.46	810	5588.27	810	6043.6	810	4514.86	810	7057	810	7986.28	810	12944.5	810	13254.4
811	6201.28	811	4722.93	811	5364.49	811	2668.57	811	6822	811	7918.5	811	13496.3	811	15500.1
812	6248.53	812	3875.83	812	5553.66	812	3389.88	812	5634.06	812	6694.38	812	12840.5	812	13696.3
813	6612.7	813	4998.81	813	6729.14	813	3285.42	813	4473.92	813	6262.76	813	11231.3	813	12957.2
814	6583.74	814	5084.77	814	7763.73	814	4041.68	814	6498.35	814	12281.1	814	10704.4	814	11620.6
815	6431.88	815	5767.36	815	7533.77	815	3867.76	815	5301.3	815	8919.35	815	9908.72	815	10333.4
816	6160.35	816	5686.11	816	7732.77	816	4133.95	816	5497.03	816	9797.93	816	10406.3	816	9676.42
817	5896.2	817	5339.84	817	9016.08	817	5951.33	817	6216.69	817	10683.3	817	11131.9	817	11622.3
818	6706.57	818	5458.07	818	8630.48	818	5137.29	818	5508.94	818	9640.69	818	10182.9	818	10401.1
819	8072.1	819	5732.51	819	9385.43	819	4211.55	819	5521.22	819	8316.35	819	10426.8	819	9815.08
820	7265.85	820	5332.4	820	9126.54	820	3618	820	5720.92	820	7508.68	820	9815.31	820	8958.32
821	6887.46	821	6244.22	821	9169.13	821	3996.52	821	6584.15	821	7890.95	821	8659.9	821	9118.11
822	6736.27	822	5436.95	822	8600.91	822	3736.29	822	7005.53	822	8287.61	822	7680.01	822	7244.82
823	5791.65	823	4500.57	823	9420.76	823	3707.5	823	7279.06	823	7851.7	823	6604.58	823	6616.07
824	5924.5	824	3820.2	824	10496.3	824	3798.63	824	7327.47	824	6214.06	824	6022.17	824	6533.47
825	5138.72	825	2990.16	825	10791.4	825	4412.65	825	7547.24	825	6982.56	825	4888.7	825	4679.66
826	5359.97	826	2840.25	826	9780.67	826	4176.22	826	7073.1	826	7595.19	826	4618.31	826	4741.24
827	6952.27	827	3560.47	827	8443.67	827	4468.28	827	6329.79	827	7574.87	827	5064.4	827	5885.21
828	8134.28	828	5225.36	828	9377.09	828	4298.63	828	5146.19	828	6748.66	828	5140.03	828	6068.9
829	7395.18	829	5484.32	829	9442.34	829	3872.71	829	6000.02	829	9182.92	829	5044.1	829	4253
830	8982.19	830	6484.44	830	9167.96	830	4225.86	830	5674.34	830	9072.52	830	5777.81	830	4505.46
831	8339.88	831	7000.45	831	10441.9	831	3931.1	831	5283.78	831	8730.42	831	6659.39	831	4197.26
832	8539.06	832	7256.16	832	10519.4	832	3839.88	832	4673.2	832	8989.26	832	8138.15	832	6463.43
833	7900.58	833	6771.34	833	10201.8	833	4884.83	833	3767.94	833	6034.16	833	10896.6	833	7333.57
834	8616.73	834	7117.2	834	10048.8	834	5556.5	834	4060.18	834	6697.97	834	12622.9	834	9240.34
835	8639.2	835	7521.7	835	8115.66	835	4683.86	835	3943.74	835	3827.93	835	12703.7	835	8919.17
836	8220.23	836	6259.95	836	7271.02	836	4831.54	836	4012.68	836	3364.28	836	12833.9	836	8979.3
837	8372.55	837	6525.38	837	8480.01	837	5113.79	837	5529.96	837	4449.72	837	11717.3	837	7870.57
838	8462.41	838	5526.49	838	10217.7	838	5235.52	838	6611	838	6138.71	838	10134.4	838	6208.56
839	8086.57	839	5760.46	839	10331.2	839	5824.11	839	7645.94	839	8638.95	839	9972.19	839	6634.88
840	7324.92	840	5073.31	840	8231.53	840	5029.06	840	8718.23	840	11744.5	840	9037.76	840	6053.6
841	6962.95	841	4614.53	841	8309.92	841	3715.18	841	8098.31	841	11769.3	841	9394.99	841	9642.26
842	6391.14	842	3907.48	842	8812.38	842	4236.06	842	6130.78	842	8465.43	842	10282.5	842	10721.4
843	6169.06	843	4309.86	843	9655.85	843	4644.71	843	4805.84	843	6883.04	843	9778.89	843	9216.03
844	6235.99	844	4346.01	844	8737.53	844	4131.28	844	4469.59	844	5110.74	844	8428.82	844	6918.37
845	5683.77	845	3430.45	845	8421.6	845	4267.57	845	5191.14	845	5005.77	845	7969.39	845	6788.74
846	5942.09	846	3196.5	846	8882.12	846	4663.88	846	5539.86	846	4750.13	846	9931.49	846	10364.1
847	5334.35	847	2706.41	847	8524.37	847	4824.97	847	4499.92	847	4515.03	847	10052.4	847	9061.33
848	5164.06	848	2859.89	848	8385.06	848	4391.44	848	3656.38	848	3926.25	848	10845	848	10470.5
849	4758.6	849	3735.17	849	8207.03	849	3971.2	849	4005.73	849	4122.38	849	11709.9	849	11707.4
850	4887.31	850	3915.57	850	7372.93	850	3665.78	850	3337.57	850	3384.13	850	11177.1	850	13148.3
851	4756.74	851	2889.55	851	8929.44	851	4323.62	851	3077.82	851	3524.35	851	7694.73	851	9476
852	4922	852	3440.38	852	9244.61	852	5483.51	852	2852.46	852	4482.29	852	4796.65	852	4627.62
853	6000.9	853	3772.11	853	8754.36	853	3664.97	853	3056.06	853	4514.62	853	4584.23	853	3564.02
854	6389.43	854	4700.38	854	7500.03	854	2397.2	854	3328.49	854	4972.76	854	5099.73	854	4312.57
855	6399.45	855	4750.46	855	8233.32	855	3347.2	855	3019.2	855	4116.58	855	4380.65	855	3780.19
856	7423.65	856	4534.06	856	9277.78	856	5761.81	856	3114.78	856	4084.18	856	4095.28	856	3964.15
857	6748.53	857	4343.51	857	8172.01	857	6514.96	857	3438.21	857	4094.91	857	4020.65	857	3631.69
858	6301.8	858	4511.5	858	9206.73	858	8590.83	858	3487.95	858	4040.53	858	5014.4	858	2769.82
859	4563.3	859	2354.61	859	10318	859	6868.33	859	4135.78	859	4002.16	859	5902.54	859	3994.17
860	5354.06	860	3409.89	860	8333.02	860	4744.43	860	4586.96	860	5100.1	860	6027.37	860	2858.87
861	5054.03	861	3216.07	861	8989.62	861	5408.61	861	3900.91	861	4319.18	861	7062.96	861	3697.22
862	5112.82	862	3092.56	862	7591.22	862	4861.5	862	2643.29	862	3188.82	862	8519.65	862	5307.12
863	5786.95	863	3980.2	863	7176.23	863	3124.44	863	3547.95	863	4024.12	863	9509.25	863	7074.27
864	5889.88	864	3901.34	864	7508.13	864	2779.19	864	3072.04	864	3466.2	864	10661.6	864	8195.82
865	5910.62	865	4192.06	865	7261.94	865	3551.8	865	2949.43	865	3314.13	865	9981.61	865	8757.84
866	5611.52	866	4203.9	866	6866.77	866	2913.62	866	4038.6	866	4461.6	866	10622.4	866	11605.9
867	4497.46	867	3213.28	867	6358.78	867	2564.68	867	5232.31	867	6591.21	867	10816.1	867	12960.5
868	3938.26	868	2094.97	868	6060.91	868	3842.09	868	4817.03	868	5515.65	868	10905.8	868	12714.4
869	4332.81	869	2017.99	869	5570.52	869	3553.75	869	4927.86	869	5782.33	869	12082.8	869	10947.4
870	5693.94	870	2878.28	870	6502.55	870	5526.74	870	4241.08	870	4462.12	870	11004.6	870	11061.6
871	7487.24	871	5168.08	871	6940.92	871	6794.94	871	4239.19	871	3825.68	871	9356.4	871	11047.9
872	8220.94	872	6643.09	872	9001.98	872	6020.83	872	3492.15	872	2919.8	872	9040.55	872	10523.7
873	7587.1	873	6615.35	873	10414.7	873	5214.44	873	3198.49	873	2807.54	873	9405.37	873	11337.5
874	8154.2	874	6541.22	874	9842.77	874	6498.29	874	3898.3	874	3916.33	874	8643.95	874	11592.9
875	7047.09	875	6202.24	875	11351	875	5654.63	875	3803.05	875	4323.19	875	7854.13	875	10450.5
876	8212.72	876	7230.68	876	10827.3	876	7794.87	876	5750.72	876	4602.74	876	5949.42	876	4759.2
877	8166.08	877	6918.14	877	9732.28	877	6066.91	877	5383.45	877	3773.94	877	6815.89	877	6185.86
878	8458.54	878	6268.96	878	9990.88	878	6880.41	878	6120.65	878	5441.44	878	7163.94	878	5221.37
879	8740.32	879	5955.16	879	9150.87	879	6005.29	879	6230.49	879	4767.03	879	9512.42	879	7430.41
880	9036.81	880	6948.39	880	10679.2	880	6767.23	880	6155.87	880	5014.68	880	8784.56	880	7470.87
881	7519.36	881	6449.15	881	13235	881	6812.55	881	5127.59	881	4353.3	881	8846.21	881	6986.56
882	7045.4	882	5254.28	882	14308.1	882	6361.52	882	4285.8	882	3787.94	882	8664.58	882	6159.19
883	8331.32	883	6197.28	883	15318.2	883	6702.89	883	5965.43	883	6849.16	883	9838.08	883	6353.4
884	7634.4	884	6004.11	884	14823.8	884	7581.18	884	5109.85	884	5588.1	884	10418.2	884	8038.63
885	6884.11	885	5764.79	885	16137	885	8225.68	885	4672.99	885	4808.47	885	10871.8	885	10320
886	6461.07	886	5831.69	886	15564.3	886	8756.5	886	5086.18	886	4481.53	886	11374.3	886	11105.9
887	6182.26	887	5312.83	887	13252.6	887	6995.43	887	6224.35	887	5215.67	887	10542.9	887	10789.8
888	4472.13	888	4022.42	888	12738.2	888	7618.05	888	5736.75	888	4805.73	888	10541.3	888	9343.91
889	6070.42	889	4825.95	889	13562.2	889	8762.68	889	5895.56	889	5034.56	889	11988.1	889	11625.7
890	4873.99	890	4670.58	890	15010.6	890	8560.63	890	6266.86	890	6387.5	890	11199	890	9188.86
891	4166.07	891	4575.82	891	16532.2	891	8056.55	891	6115.78	891	5507.15	891	11340.4	891	9715.81
892	4463.9	892	4653.17	892	17168.1	892	8275.98	892	5535.12	892	4985.57	892	8958.03	892	6969.55
893	2762.73	893	3779.43	893	17762.4	893	8733.86	893	4941.3	893	4996.89	893	8719.47	893	5720.04
894	3436.83	894	3474.13	894	18273	894	11139	894	4492.65	894	5576.66	894	9800.34	894	7246.9
895	3826.11	895	3853.51	895	19402.7	895	10340.6	895	7020.5	895	7760.32	895	10969.6	895	8075.84
896	3730.1	896	3628.15	896	18916	896	10065.1	896	6754.03	896	7587.86	896	10418.1	896	7387.48
897	4646.77	897	4138.84	897	19385.7	897	10772	897	7558.01	897	7052.05	897	11330.2	897	9316.19
898	3496.53	898	3208.21	898	19838.5	898	10909.9	898	7191.45	898	6891.26	898	10963.8	898	10202.3
899	3434.45	899	2312.3	899	18747.8	899	9867.97	899	6816.48	899	5897.44	899	11511.6	899	9134.96
900	2782.96	900	2098.18	900	17077	900	8924.36	900	6550.61	900	5991.26	900	12133.9	900	9145.81
901	3046.9	901	2200.15	901	16463.9	901	9422.57	901	6504.12	901	5038.12	901	11688	901	9076.84
902	1972.09	902	2159.67	902	16832.1	902	8453.15	902	6155.4	902	5498.53	902	11069.5	902	9193.25
903	2378.48	903	2170.18	903	16791	903	7775.38	903	4698.12	903	3033.01	903	9930.68	903	9104.63
904	1494.79	904	2180.5	904	14999.7	904	7738.95	904	4651.97	904	3011.8	904	8820.9	904	7085.85
905	2387.89	905	3005.56	905	9209.77	905	3110.55	905	4079.4	905	2660	905	10292	905	9502.5
906	3399.19	906	4153.39	906	4686.38	906	1834.29	906	3629.52	906	3140.35	906	11688	906	10714.9
907	3750.59	907	4279.01	907	2244.68	907	2484.2	907	3815.01	907	3748.66	907	15373	907	12251.1
908	2315.14	908	3176.47	908	2692.23	908	2358.97	908	3653.19	908	3499.98	908	14086.4	908	11757.6
909	2382.32	909	2632.1	909	5083.9	909	5307.55	909	3966.35	909	3473.96	909	13999.3	909	12753.5
910	2476.1	910	2341.39	910	7924.91	910	6652.05	910	4357.77	910	3780.27	910	14028.9	910	13932.8
911	1216.69	911	1175.74	911	10384.1	911	8568.57	911	4695.37	911	5013.97	911	14697.6	911	14254.6
912	2661.34	912	2500.84	912	8874.69	912	7963.02	912	4610.87	912	4732.76	912	15037.7	912	14094
913	3017.35	913	2299.82	913	11796.1	913	9080.21	913	5017.44	913	5633.46	913	15075.8	913	12930.4
914	3790.41	914	2416.63	914	12903.4	914	10107.2	914	4951.66	914	5618.68	914	14579.2	914	13450.4
915	4602.58	915	2209.56	915	13795.7	915	8229.07	915	4938.22	915	6750.71	915	16663.4	915	18624.5
916	5133.51	916	2048.43	916	12795.5	916	6062.41	916	5969.45	916	7436.78	916	15034.5	916	16641.6
917	4371.16	917	1637.32	917	11133.7	917	6098.1	917	7186.41	917	7434.01	917	17306.7	917	19995.3
918	4765.36	918	2355.68	918	11281.8	918	7155.72	918	7615	918	9062.38	918	17207.8	918	17111.7
919	3616.02	919	2993.57	919	9040.25	919	5769.3	919	8147.09	919	8326.77	919	15976.7	919	16471.2
920	4281.71	920	3226.5	920	7501.56	920	4923.31	920	7492.04	920	7225.26	920	13681.6	920	13373.6
921	4042.72	921	3158.69	921	8116.62	921	6457.34	921	8353	921	8000.43	921	11948	921	11788
922	1788.67	922	1420.95	922	9313.42	922	7038.36	922	7603.94	922	6883.28	922	11000.7	922	9964.25
923	2146.36	923	1625.91	923	10169	923	7597.27	923	7973.38	923	7774.94	923	10414.9	923	10064.7
924	2437.87	924	1959.38	924	10894.5	924	6515.52	924	6804.57	924	6611.01	924	10395.4	924	10973.7
925	2389.25	925	1986.28	925	13096.3	925	6928.04	925	7685.42	925	7649.06	925	9095.67	925	8241.27
926	1536.89	926	1538.87	926	13709.8	926	9088.26	926	7612.66	926	7431.98	926	8171.9	926	7821.19
927	1609.27	927	1402.72	927	13800.3	927	8792.66	927	6460.37	927	7135.22	927	8108.53	927	6517.19
928	1860.46	928	1833.32	928	13717	928	8848.3	928	6229.56	928	7012.55	928	8103.79	928	5291.36
929	1255.13	929	1307.15	929	13609.7	929	7947.64	929	7188.44	929	7170.55	929	8053.99	929	5410.57
930	1743.98	930	1624.83	930	10311.6	930	6531.19	930	5949.73	930	5871.92	930	7627.25	930	4685.33
931	1613.67	931	1006.75	931	11662.6	931	5594.68	931	5376.36	931	4458.29	931	7804.72	931	4248.81
932	2164.66	932	1295.07	932	11065	932	4451.45	932	6622.2	932	6044.15	932	7863.94	932	5005.83
933	1982.19	933	1033.5	933	13380.6	933	7081.13	933	7786.21	933	6310.7	933	8439.96	933	5898.96
934	1899.94	934	1358.55	934	15933.3	934	8674.97	934	8345.4	934	5596.19	934	9540.74	934	7623.56
935	2012.15	935	1340.21	935	15630.4	935	9452.63	935	7937.89	935	5971.22	935	10825.3	935	9769.42
936	2025.83	936	1589.58	936	16752.3	936	8981.21	936	7831.27	936	5568.21	936	12112.1	936	11496.3
937	3026.55	937	2477.32	937	17189.1	937	7034.75	937	6796.77	937	5510.47	937	13063.9	937	11449.5
938	3096.67	938	2379.13	938	15678.1	938	7661.85	938	6905.54	938	5589.28	938	12016.3	938	9788.27
939	3179.25	939	2016.88	939	14520.7	939	7546.63	939	6648.34	939	5594.03	939	11768.9	939	10816.3
940	2735.62	940	1762.42	940	13485.3	940	5796.84	940	5972.54	940	5671.82	940	12666	940	12008.7
941	2036.8	941	1501.3	941	15025.1	941	6859.71	941	4610.76	941	4454.45	941	11290.8	941	13154.9
942	2030.98	942	1376.16	942	15601.5	942	8967.97	942	4855.35	942	5104.11	942	11151.1	942	13116.1
943	2598.12	943	1890.13	943	13188.2	943	7925.19	943	3678.05	943	4351.44	943	11714	943	12805
944	2740.83	944	1596.14	944	9492.29	944	6352.35	944	5211.13	944	5276.38	944	13054.8	944	14182.7
945	2442.01	945	1250.68	945	8400.19	945	6063.06	945	3920.74	945	4098.85	945	12560	945	13488.9
946	2351.43	946	1113.04	946	8319.4	946	6862.02	946	3228.59	946	3593.61	946	14107.6	946	14067.8
947	2471.07	947	960.586	947	8881.46	947	7482.85	947	2961.25	947	3689.46	947	15969	947	17205.2
948	3160.09	948	960.244	948	6302.85	948	4851.36	948	4913.46	948	4871.54	948	15759.3	948	17983.5
949	4042.39	949	1194.08	949	6843.13	949	5836.8	949	4822.62	949	4645.54	949	15894.4	949	16194.6
950	5027.55	950	1935.58	950	7122.92	950	6243.12	950	4351.17	950	4839.6	950	13128.5	950	14400.8
951	4976.71	951	2406.82	951	5941.5	951	4926.75	951	4498.9	951	4415.41	951	13270.4	951	13033.4
952	4968.44	952	2167.51	952	7349.52	952	6221.65	952	3972.26	952	4006.18	952	12900	952	11588.2
953	5256.47	953	2355.65	953	8190.82	953	7182.41	953	3903.47	953	3166.65	953	12533.8	953	12728
954	5911.07	954	2606.3	954	9484.65	954	6656.32	954	3704.07	954	3330.92	954	13612.4	954	15306
955	6373.34	955	3021.86	955	8378.7	955	6238.7	955	3194.39	955	3605.48	955	14762.8	955	17662.9
956	6298.27	956	3351.03	956	6816.99	956	5095.81	956	3246.88	956	2899.96	956	14688.6	956	18209.8
957	6955.49	957	2927.23	957	6545.63	957	4481.75	957	3416.4	957	3131.02	957	13883.2	957	16529
958	7462.35	958	3129.97	958	6729.74	958	4248.24	958	3053.22	958	3194.86	958	11666.8	958	15076.7
959	6977.47	959	2853	959	6652.45	959	3879.72	959	2881.43	959	3075.7	959	10458.7	959	14029.6
960	8035.3	960	4162.23	960	7169.38	960	3303.86	960	3668.27	960	3320.88	960	10921.6	960	13429.9
961	8230.2	961	4800.57	961	6617.95	961	2346.62	961	3365.31	961	3771.03	961	9468.29	961	12089.6
962	7074.59	962	4315.81	962	6902.85	962	2849.51	962	3447.5	962	3051.57	962	8140.35	962	9761.5
963	8345.15	963	4667.65	963	7149.14	963	3536.31	963	3323.72	963	3029.79	963	8112.74	963	9676.02
964	8810.33	964	3852.72	964	6944.19	964	3563.85	964	3681.48	964	3479.54	964	10203.8	964	8804.64
965	7869.94	965	3794.95	965	7303.8	965	4957.33	965	5012.69	965	4178.25	965	9773.36	965	9341.4
966	7687.6	966	4220.58	966	7125.15	966	5135.67	966	4363.85	966	3641.09	966	10295.4	966	9176.99
967	7906.23	967	3785.18	967	7560.79	967	4505.97	967	4415.8	967	3895.85	967	9544.56	967	8441.32
968	7717.52	968	4222.23	968	7127.81	968	4589.51	968	4135.41	968	4365.48	968	9875.55	968	9940.12
969	7158.9	969	4257.51	969	7815.91	969	4454	969	4603.08	969	4074.06	969	10300.2	969	10834.9
970	6602.05	970	4732.88	970	9721.18	970	5681.79	970	5762.94	970	4604.12	970	10255.3	970	11167.5
971	6253.1	971	5437.1	971	10087.5	971	5453.1	971	7148.15	971	5636.91	971	9880.64	971	9962.94
972	6520.24	972	5041.42	972	8969.93	972	6142.54	972	7808.72	972	7067.66	972	12117.4	972	11785.4
973	6174.02	973	4513.81	973	9428.06	973	4626.82	973	7205.67	973	7269.38	973	11325.1	973	10924.4
974	5752.84	974	4041.18	974	7650.98	974	5131.18	974	6007.43	974	6321.06	974	11496.9	974	11726.6
975	5803.52	975	3941.53	975	7135.08	975	4983.78	975	5024.13	975	5430.55	975	11758.9	975	13395.7
976	4638.77	976	3241.22	976	6374.89	976	5428.1	976	6005.87	976	6442.75	976	12305.9	976	14990.5
977	4541.38	977	3521.03	977	5156.73	977	4482.96	977	7054.27	977	7049.27	977	11897.5	977	12309.2
978	3085.81	978	1434.04	978	5620.98	978	3953.76	978	6564.53	978	6620.36	978	12464.6	978	11127.9
979	3750.53	979	2120.45	979	4801.75	979	3125.65	979	7601.63	979	6850.78	979	12463.5	979	12950.5
980	4705.86	980	2921.78	980	4482.77	980	1456.41	980	6707.45	980	6633.42	980	12567.5	980	11686.5
981	3901.31	981	2094.33	981	2756.72	981	905.297	981	6381.91	981	7530.44	981	11029.7	981	9838.17
982	2629.4	982	949.255	982	2998.96	982	1313.78	982	6256.36	982	7457.8	982	10482.8	982	7695.16
983	4026.77	983	2149.86	983	3165.38	983	1583.89	983	5444.78	983	7167.21	983	7503.52	983	4673.44
984	4783.43	984	1818.99	984	2931.44	984	1310.71	984	5004.03	984	7417.73	984	7146.37	984	4567.38
985	4278.26	985	803.461	985	2915.66	985	662.413	985	5357.43	985	7921.35	985	6333.44	985	3694.83
986	5138.26	986	1196.82	986	3635.38	986	1027.97	986	5324.24	986	7236.53	986	6071.99	986	2888.07
987	3900.74	987	928.579	987	3731.21	987	991.478	987	4855.78	987	5953.17	987	6632.92	987	4510.8
988	2917.12	988	527.4	988	3195.16	988	874.465	988	5905.39	988	7250.9	988	6659.1	988	5427.56
989	3314.99	989	801.957	989	3825.8	989	1833.14	989	4551.52	989	5697.43	989	6217.5	989	5586.12
990	4157.32	990	1033.94	990	2599.58	990	1724.81	990	4164.83	990	4889.69	990	6351.95	990	5338.71
991	2507.18	991	563.251	991	3879.73	991	4131.64	991	4335.06	991	3963.28	991	5445.28	991	5277.16
992	4105.07	992	857.676	992	6382.76	992	5785.98	992	4886.79	992	4364.86	992	6536.18	992	5585.81
993	4744.57	993	1904.35	993	8573.47	993	5189.11	993	5052.27	993	5212.57	993	7866.57	993	6665.07
994	3138.74	994	1409.71	994	9144.4	994	6750.7	994	5147.57	994	4997.38	994	8932.65	994	7644.37
995	3369	995	1916.91	995	11467.3	995	9179.41	995	4095.34	995	4044.96	995	10350	995	9766.71
996	3235.3	996	774.34	996	15859.7	996	11618.8	996	4119.03	996	3246.09	996	11237.2	996	11373.7
997	4328.65	997	1349.38	997	15882.9	997	10859.2	997	4234.58	997	3663.11	997	10907.2	997	10689.5
998	3504.76	998	265.755	998	20467.7	998	10172.4	998	3854.96	998	4178.66	998	10840.8	998	11292.3
999	3968.92	999	622.658	999	18974.9	999	7442.49	999	4428.47	999	3987.15	999	10423.4	999	11635.1
1000	2608.55	1000	769.2	1000	16343.4	1000	6929.46	1000	4756.71	1000	4311.45	1000	11045.2	1000	13539.4
1001	2807.91	1001	1027.16	1001	14519.7	1001	6840.19	1001	4837.26	1001	4036.49	1001	10479.5	1001	13153.5
1002	3728.29	1002	1633.85	1002	12317.8	1002	7098.95	1002	6393.39	1002	5206.69	1002	10341.8	1002	13327.5
1003	3516.38	1003	1650.91	1003	11028.9	1003	6921.05	1003	6759.02	1003	5328.35	1003	11179.7	1003	16040
1004	3753.01	1004	1788.08	1004	11030	1004	6593.21	1004	6454.47	1004	5831.47	1004	11875.3	1004	15689
1005	2442.56	1005	1203.76	1005	11465.5	1005	5453.32	1005	6210.18	1005	7254.96	1005	10984.7	1005	15455.2
1006	2606.8	1006	1310.61	1006	11427.6	1006	5845.3	1006	5906.2	1006	8562.28	1006	10078.2	1006	12455.6
1007	2451.06	1007	832.014	1007	10510.3	1007	4959.28	1007	6173.55	1007	7364.01	1007	11252	1007	13429.1
1008	2779.34	1008	1439.18	1008	10531.9	1008	5704.63	1008	5996.25	1008	6960.4	1008	11538	1008	13511.9
1009	2790.17	1009	1415	1009	10669	1009	5002.23	1009	6010.25	1009	7283.48	1009	11599.7	1009	12666.9
1010	3259	1010	2191.65	1010	11918.4	1010	6232.37	1010	6362.54	1010	7921.05	1010	10881.5	1010	13508.3
1011	3221.34	1011	2427.43	1011	11162	1011	5244.07	1011	5513.86	1011	7315.78	1011	9987.86	1011	13844.7
1012	4730.86	1012	4336.38	1012	9428.98	1012	3495.17	1012	5811.58	1012	7209.37	1012	10824.6	1012	12763.6
1013	3812.2	1013	3555.13	1013	6683.28	1013	2796.92	1013	6454.07	1013	7439.6	1013	11923.6	1013	11793.1
1014	5266.12	1014	2946.59	1014	4391.17	1014	2489.71	1014	6139.14	1014	6672.75	1014	11372.3	1014	9499.94
1015	4345.3	1015	1160.35	1015	5147.79	1015	2135.15	1015	6115.51	1015	6392.47	1015	9778.8	1015	6642.09
1016	3633.91	1016	997.974	1016	4690.67	1016	3726.65	1016	5806.06	1016	6090.48	1016	9691.75	1016	8697.95
1017	2318.1	1017	500.009	1017	4009.9	1017	3984.56	1017	5660.77	1017	4889.88	1017	9362.28	1017	8079.88
1018	2071.64	1018	974.657	1018	5379.34	1018	3951.24	1018	5480.33	1018	5124.72	1018	9326.1	1018	9046.09
1019	1959.2	1019	1582.95	1019	5784.59	1019	4675.68	1019	4408.29	1019	4982.7	1019	9157.27	1019	8039.73
1020	3088.83	1020	2458.55	1020	6166.57	1020	4391.34	1020	6116.95	1020	6283.77	1020	9539.65	1020	9891.83
1021	2319.26	1021	1888.02	1021	7403.14	1021	4908.75	1021	7528.56	1021	6717.89	1021	10426.3	1021	11647.3
1022	2919.42	1022	1336.3	1022	8986.3	1022	5762.83	1022	6572.37	1022	6418.9	1022	11441.8	1022	12491.5
1023	2421.08	1023	997.396	1023	9873.85	1023	6408.24	1023	6429.26	1023	5986.94	1023	12637	1023	13349.3
1024	2717.1	1024	122.916	1024	9340.5	1024	5476.62	1024	6532.68	1024	5188.92	1024	12321.8	1024	13273.7
1025	2658.93	1025	507.09	1025	8373.56	1025	5215.45	1025	6287.86	1025	5594.9	1025	14523.1	1025	15312.5
1026	2871.07	1026	924.289	1026	10161.7	1026	5935.6	1026	6017.73	1026	5152.02	1026	15030	1026	16864.5
1027	3448.12	1027	461.779	1027	9303.95	1027	5365.55	1027	5752.58	1027	5899.59	1027	14139.3	1027	17222.8
1028	2837.37	1028	1732.43	1028	9544.92	1028	5395.42	1028	5259.9	1028	5623.59	1028	15043.7	1028	17471.3
1029	3324.11	1029	4178.66	1029	8674.82	1029	7136.9	1029	5915.32	1029	6130.34	1029	13584.7	1029	14350.1
1030	2971.95	1030	3435.46	1030	8350.83	1030	6432.43	1030	5300.85	1030	5510.08	1030	11470	1030	12015.8
1031	3623.1	1031	4104.49	1031	6658.88	1031	6054.49	1031	4959.03	1031	3923.94	1031	10126.8	1031	10940.8
1032	5131.9	1032	4490.06	1032	7655.82	1032	6603.92	1032	4735.84	1032	4223.01	1032	9181.51	1032	8971.17
1033	5156.83	1033	3261.95	1033	8533.33	1033	7570.76	1033	3748.91	1033	3915.25	1033	7023.33	1033	5916.94
1034	5622.55	1034	2742.94	1034	8919.58	1034	6153.06	1034	2932.8	1034	4031.4	1034	6217.55	1034	5456.28
1035	5471.15	1035	2604.17	1035	7889.61	1035	5254.84	1035	2651.24	1035	3865.77	1035	7908.5	1035	7310.19
1036	6803.48	1036	3668.73	1036	6999.67	1036	5394.49	1036	2560.97	1036	3204.38	1036	8425.77	1036	6715.13
1037	6492	1037	3824.55	1037	5722.01	1037	4280.73	1037	2962.78	1037	3110.3	1037	8725.62	1037	7607.24
1038	6420.15	1038	3732.26	1038	5976.95	1038	5090.95	1038	3956.39	1038	3955.49	1038	8881.97	1038	6986.69
1039	6288.52	1039	3601.37	1039	5620.05	1039	4823.9	1039	4571.77	1039	4705.52	1039	7070.77	1039	6250.78
1040	6753.61	1040	4762.89	1040	6082.38	1040	4990.76	1040	4419.05	1040	6247.6	1040	7323.04	1040	4965.88
1041	7264.32	1041	5346.23	1041	5578.01	1041	2637.58	1041	2937.14	1041	5194.06	1041	5604.99	1041	6114.55
1042	8063.12	1042	6252.02	1042	5123.54	1042	1872.77	1042	3586.37	1042	5015.3	1042	4212.27	1042	6064.34
1043	10145.7	1043	7262.82	1043	4034.27	1043	1236.14	1043	4731.09	1043	5270.72	1043	4253.26	1043	6308.82
1044	9443.53	1044	5546.22	1044	3961.34	1044	1988.49	1044	4558.12	1044	5007.32	1044	4978.69	1044	5490.44
1045	7621.2	1045	4477.17	1045	3805.07	1045	2141.73	1045	3865.22	1045	4837.27	1045	5135.72	1045	5160.69
1046	6269.76	1046	3963.84	1046	3352.69	1046	2122.84	1046	4186.59	1046	4741.55	1046	6535.39	1046	6367.93
1047	6969.83	1047	4410.35	1047	3149.04	1047	1833.29	1047	4171.39	1047	4364.09	1047	7334.16	1047	9813.78
1048	7594.82	1048	5404.07	1048	3729	1048	1073.95	1048	3915.18	1048	4206.26	1048	8099.08	1048	11793
1049	9108.56	1049	7567.58	1049	4489.86	1049	1949.59	1049	4297.65	1049	5967.35	1049	8075.89	1049	10062.3
1050	9522.41	1050	6862.42	1050	6260.76	1050	2827.1	1050	4292.5	1050	5178.23	1050	6731.83	1050	6216.16
1051	9775.22	1051	5918.06	1051	4523.44	1051	2401.01	1051	2990.49	1051	5096.04	1051	6755.49	1051	6286.41
1052	9173.51	1052	5907.96	1052	4535.66	1052	2312.81	1052	4063.16	1052	6173.57	1052	6506.22	1052	7017.35
1053	11620.3	1053	7556.23	1053	4654.05	1053	2195.55	1053	3140.99	1053	5284.44	1053	6430.57	1053	6799.23
1054	10877.2	1054	7113.09	1054	3881.87	1054	2437.07	1054	3229.71	1054	4901.4	1054	5381.21	1054	6250.86
1055	11064.4	1055	6405.62	1055	4260.9	1055	2466.06	1055	1828.45	1055	2528.24	1055	5225.17	1055	7474.66
1056	9110.96	1056	5080.58	1056	5377.6	1056	3033.36	1056	2356.01	1056	3532.08	1056	5589.37	1056	7239.21
1057	11426	1057	7528.62	1057	4861.54	1057	1780.78	1057	3438.36	1057	3998.93	1057	6410.21	1057	8490.29
1058	8933.2	1058	5765.53	1058	4839.73	1058	1533.84	1058	3051.65	1058	3830.26	1058	7470.65	1058	9639.6
1059	6937.95	1059	4419.9	1059	2722.97	1059	1052.03	1059	2684.36	1059	2721.22	1059	7615.05	1059	8374.85
1060	6372.15	1060	4489.59	1060	3182.96	1060	1261.19	1060	3256.24	1060	3401.54	1060	7908.35	1060	9797.19
1061	6246.69	1061	4329.48	1061	3102.57	1061	1041.7	1061	3528.33	1061	3640.56	1061	8734.86	1061	7281.28
1062	5839.4	1062	3865.57	1062	4037.73	1062	1191.41	1062	3425.34	1062	2684.25	1062	9721.09	1062	9950.98
1063	5484.52	1063	3025.72	1063	3209.25	1063	2011.9	1063	3739.32	1063	3404.15	1063	8914	1063	8917.47
1064	5194.48	1064	2300.9	1064	3029.65	1064	2124.93	1064	3843.07	1064	3403.98	1064	7593.86	1064	6290.21
1065	5122.27	1065	2934.43	1065	3671.02	1065	2864.82	1065	4352.53	1065	3569.15	1065	6699.2	1065	5752.91
1066	4395.59	1066	3151.75	1066	3839.16	1066	2567.22	1066	4100.05	1066	4349.03	1066	5170.55	1066	3540.05
1067	3660.33	1067	3447.04	1067	4095.66	1067	2781.2	1067	3691.39	1067	3668.22	1067	4505.87	1067	3077.55
1068	3145.1	1068	3705.4	1068	5653.25	1068	4174.31	1068	3974.6	1068	4154.42	1068	4537.01	1068	3238.91
1069	3031.81	1069	3113.61	1069	5916.24	1069	4565.41	1069	4558.52	1069	4748.15	1069	5368.36	1069	3728.88
1070	3245.73	1070	3372.65	1070	6872.94	1070	5093.02	1070	5510.14	1070	6224.82	1070	5812.85	1070	3590.65
1071	3658.06	1071	4248.76	1071	7848.44	1071	4709.76	1071	6361.09	1071	8119.32	1071	6994.52	1071	5233.08
1072	4582.34	1072	5471.35	1072	8154.22	1072	4440.09	1072	6958.4	1072	7480.73	1072	6369.64	1072	3857.78
1073	3895.24	1073	5095.54	1073	8870.69	1073	4905.87	1073	4952.66	1073	6005.57	1073	6345.54	1073	3900.89
1074	4014.77	1074	4631.53	1074	8800.64	1074	4044.25	1074	5099.26	1074	5965.3	1074	6620.65	1074	5518.31
1075	4798.26	1075	5082.8	1075	7963	1075	3352.66	1075	5646.44	1075	6907.1	1075	8617.54	1075	8284.19
1076	4465.92	1076	5113.11	1076	7360.23	1076	3240.99	1076	6690.45	1076	7848.87	1076	7974.7	1076	6692.17
1077	3763.84	1077	4459.56	1077	6367.1	1077	2917.51	1077	7155.71	1077	8026.69	1077	5956.96	1077	6174.19
1078	3994.18	1078	5347.58	1078	6511.44	1078	2240.36	1078	6237.15	1078	6666.15	1078	7463.75	1078	7915.44
1079	4464.37	1079	6276.64	1079	5522.21	1079	1604.91	1079	5139.4	1079	4908.78	1079	7484.96	1079	6630.83
1080	4643.1	1080	5555.85	1080	4554.94	1080	2303.22	1080	4806.34	1080	4969.69	1080	8510.22	1080	6156.18
1081	4596.16	1081	5277.68	1081	4802.16	1081	2251.21	1081	4584.85	1081	4418.97	1081	8051.68	1081	5326.78
1082	4010.51	1082	5052.05	1082	4247.35	1082	1999.2	1082	4738.42	1082	4397.52	1082	7672.85	1082	5244.15
1083	4354.38	1083	4593.82	1083	4935.14	1083	2172.4	1083	4707.31	1083	4109.25	1083	7610.57	1083	5558.3
1084	3655.19	1084	3354.54	1084	5377.02	1084	2305.03	1084	5818.84	1084	5440.92	1084	7520.19	1084	6395.23
1085	3100.99	1085	3650.44	1085	4934.68	1085	1768.83	1085	5275.17	1085	4973.56	1085	5820.46	1085	6049.51
1086	2902.45	1086	2531.53	1086	4945.76	1086	2227.61	1086	4521.36	1086	5120.88	1086	9971.04	1086	8662.13
1087	2802.39	1087	1751.49	1087	4310.13	1087	2296.42	1087	5156.69	1087	5146.08	1087	7783.5	1087	7324.76
1088	2880.03	1088	2150.06	1088	5033.37	1088	2611.28	1088	4928.67	1088	6024.91	1088	10249.2	1088	8317.89
1089	2649.9	1089	1191.05	1089	4237.41	1089	2317.97	1089	4955.35	1089	6072.86	1089	11329.6	1089	9107.51
1090	3373.25	1090	1709.67	1090	4356.67	1090	2943.68	1090	4475.66	1090	4623.94	1090	10173.4	1090	6767.86
1091	4057.02	1091	2595.19	1091	5102.59	1091	2919.63	1091	4504.41	1091	4903.22	1091	10023.7	1091	7973.31
1092	4001.98	1092	3000.36	1092	4427.11	1092	3525.02	1092	4833.04	1092	5874.76	1092	10131	1092	8703.69
1093	3077.42	1093	2148.29	1093	4625.53	1093	2804.66	1093	3819.02	1093	3698.97	1093	9326.52	1093	5558.95
1094	3770.41	1094	3117.27	1094	4372.92	1094	2564.05	1094	3850.55	1094	3148.78	1094	9963.06	1094	6609.69
1095	2887.66	1095	2349.73	1095	4265.24	1095	2637.7	1095	3913.83	1095	3836	1095	10337.2	1095	7224.94
1096	2848.41	1096	2032.89	1096	4741.13	1096	2861.2	1096	3903.42	1096	3919.22	1096	11591.5	1096	8047.44
1097	2965.57	1097	2630.99	1097	5302.81	1097	2716.77	1097	3685.97	1097	3492.82	1097	14087.7	1097	9717.9
1098	4109.97	1098	3303.53	1098	5942.83	1098	3807.89	1098	4078.79	1098	3640.62	1098	14698.6	1098	10598.3
1099	5972.34	1099	3419.64	1099	4668.33	1099	3892.85	1099	4319.81	1099	3972.06	1099	13857.8	1099	11395.9
1100	6933.96	1100	5276.66	1100	5799.16	1100	4229.53	1100	4961.11	1100	4416.22	1100	13228.8	1100	12046.4
1101	7115.83	1101	5031.9	1101	5569.38	1101	5417.84	1101	4732.57	1101	4945.68	1101	14628.9	1101	11838.4
1102	7876.97	1102	6012.29	1102	6452.97	1102	5084.11	1102	4053.75	1102	4993.66	1102	14121.7	1102	13262
1103	8112.78	1103	5951.39	1103	6590.54	1103	4472.52	1103	4459.18	1103	4587.5	1103	14394.9	1103	14692
1104	7878.23	1104	5667.34	1104	5930.29	1104	4030.49	1104	3883.59	1104	3290.94	1104	12908	1104	14626.1
1105	7699.18	1105	5634.8	1105	6490.94	1105	3849.42	1105	3651.7	1105	2694.9	1105	13599	1105	12874.5
1106	6631.19	1106	3847.58	1106	6608.32	1106	3289.2	1106	3995.86	1106	2333.86	1106	13096.4	1106	14176.3
1107	6745.88	1107	4540.69	1107	5187.92	1107	2148.88	1107	4530.8	1107	3198.9	1107	12613.5	1107	13639
1108	6440.04	1108	4743.55	1108	5563.04	1108	2281.49	1108	4951.04	1108	2922.48	1108	13282.1	1108	14541.4
1109	6327.84	1109	4599.9	1109	6048.79	1109	3089.66	1109	6597.1	1109	4366.74	1109	15172.4	1109	12639.9
1110	7969.94	1110	4922.25	1110	6547.27	1110	2985.03	1110	6001.71	1110	5022.26	1110	15399.3	1110	14016.4
1111	7282.97	1111	4243.67	1111	5666.22	1111	3463.93	1111	4790.02	1111	4574.12	1111	15225.2	1111	14404.9
1112	7885.85	1112	4825.77	1112	6365.73	1112	3808.07	1112	4257.4	1112	4367.99	1112	15739.9	1112	16350.7
1113	8544.4	1113	5006.7	1113	6844.27	1113	3560.22	1113	5516.9	1113	5456.85	1113	15467.2	1113	15102.2
1114	8288.12	1114	5076.25	1114	8287.67	1114	4597.92	1114	6039.27	1114	5113.54	1114	16063.9	1114	17622.2
1115	8564.98	1115	5674.53	1115	9125.89	1115	4975.54	1115	7356.42	1115	5471.03	1115	15697.2	1115	13721.8
1116	8142.07	1116	5591.64	1116	10248.1	1116	5773.42	1116	8161.74	1116	6548.77	1116	16747.9	1116	17505.1
1117	7871.55	1117	6622.37	1117	10755.2	1117	6492.75	1117	7705.75	1117	5466.65	1117	16600.3	1117	19406.2
1118	7622.13	1118	7693.15	1118	11294.4	1118	6509.28	1118	7883.52	1118	6718.46	1118	17705.2	1118	17540.3
1119	7448.39	1119	7078.44	1119	10824.5	1119	5852.59	1119	8409.06	1119	7082.4	1119	15806.3	1119	13944.2
1120	6399.71	1120	5707.97	1120	11843.5	1120	7008.32	1120	9245.98	1120	8907.2	1120	16271.4	1120	16582.4
1121	6403.54	1121	4835.43	1121	13222.5	1121	7313.13	1121	8385.3	1121	7845.49	1121	14136.9	1121	11692.3
1122	5426.9	1122	4102.61	1122	14212.4	1122	7473.35	1122	6838.49	1122	6079.29	1122	15575.5	1122	14808.7
1123	5333.13	1123	2845.93	1123	15542.3	1123	8005.58	1123	7495.94	1123	6700.23	1123	15149.6	1123	15788.5
1124	7241.86	1124	5157.65	1124	13870.7	1124	6952.32	1124	5693.79	1124	5079.26	1124	16994	1124	17968.2
1125	7681.47	1125	5517.98	1125	14580.7	1125	7066.8	1125	5063.24	1125	4529.19	1125	17641.6	1125	18069.5
1126	6639.64	1126	4361.24	1126	13031.7	1126	7209.81	1126	6167.91	1126	5604.99	1126	16290.5	1126	18930.7
1127	6134.96	1127	3834.33	1127	12912.3	1127	7227.37	1127	5835.47	1127	6786.64	1127	15760.8	1127	20261.5
1128	5365.28	1128	3154.02	1128	11871.2	1128	6576.33	1128	4533.37	1128	5131.21	1128	19575.6	1128	21553.3
1129	5372.82	1129	3992.18	1129	12347.4	1129	6850.12	1129	5019.79	1129	5335.96	1129	19002.3	1129	21904.6
1130	6932.36	1130	4154.55	1130	10892.2	1130	6243.64	1130	5128.87	1130	5703.22	1130	20847.4	1130	18598.7
1131	7541.35	1131	4996.39	1131	10876.8	1131	6818.15	1131	4605.16	1131	4790.21	1131	21448	1131	20122.9
1132	8646.15	1132	6315.47	1132	11161.7	1132	6227.69	1132	3547.63	1132	3157.8	1132	20853.8	1132	19728.8
1133	9450.14	1133	6473.02	1133	9687.48	1133	5490.89	1133	4318.81	1133	3785.4	1133	19420.6	1133	17650.8
1134	8689.11	1134	5892.71	1134	9628.17	1134	5710.19	1134	4710.13	1134	4552.36	1134	19508.4	1134	17777.2
1135	8316.16	1135	5856.46	1135	9413.51	1135	6109.16	1135	4825.23	1135	4379.57	1135	18801.4	1135	19109.5
1136	6734.44	1136	5040.86	1136	9938.32	1136	5153.39	1136	4632.82	1136	3713.59	1136	19065.9	1136	18711.5
1137	5499.45	1137	4744.11	1137	10726	1137	6010.72	1137	4725.54	1137	4178.08	1137	18408.2	1137	20870.5
1138	5296.5	1138	3676.61	1138	11311	1138	5638.52	1138	4624.82	1138	3936.27	1138	16404.6	1138	19583.3
1139	5578.02	1139	3929.51	1139	11789.5	1139	6929.83	1139	4856.53	1139	3832.2	1139	14752.1	1139	16859.5
1140	4910.33	1140	4375.77	1140	12891	1140	7541.9	1140	4405.5	1140	2887.05	1140	14330.4	1140	18240.4
1141	4453.95	1141	4301.26	1141	13134.3	1141	8298.7	1141	5010.51	1141	3652.53	1141	13197.1	1141	16086.8
1142	4112.75	1142	4634	1142	12599	1142	8274.17	1142	6425.82	1142	4268.83	1142	12461.7	1142	15406.2
1143	3911.77	1143	4810.36	1143	12633.8	1143	8203.22	1143	7925.51	1143	5982.11	1143	10776.9	1143	14529.7
1144	3332.05	1144	3695.2	1144	12375.3	1144	8088.97	1144	8605.47	1144	8250.09	1144	9867.11	1144	12978.9
1145	3788.35	1145	2636.76	1145	12785.8	1145	8211.44	1145	9603.63	1145	8301.1	1145	10892.2	1145	13637.3
1146	3905.57	1146	2216.68	1146	13210.4	1146	7246.86	1146	9741.4	1146	9928.11	1146	9202.99	1146	11567.3
1147	4127.23	1147	2652.08	1147	13998.9	1147	6960.18	1147	8828.55	1147	9152.01	1147	7943.55	1147	10491.5
1148	5058.97	1148	2707.32	1148	14544.5	1148	6558.15	1148	7640.75	1148	7927.33	1148	8332.95	1148	11467.4
1149	5448.41	1149	3597.79	1149	15079	1149	5429.41	1149	8381.11	1149	9146.85	1149	11531.7	1149	15117.2
1150	5554.13	1150	3998.97	1150	15631.8	1150	5505.6	1150	7269.86	1150	7682.75	1150	11467.7	1150	13788.6
1151	4574.28	1151	3171.93	1151	16071.4	1151	6429.07	1151	6780.43	1151	6323.85	1151	15826.6	1151	15260.8
1152	5030.53	1152	2818.39	1152	17309.5	1152	7160.92	1152	7008.11	1152	6566.96	1152	15192.5	1152	15484.1
1153	5698.92	1153	3137.81	1153	13867.5	1153	5228.72	1153	6097.97	1153	5793.58	1153	16743.5	1153	17870.7
1154	6171.74	1154	3517.35	1154	14726.5	1154	6375.82	1154	8294.98	1154	9043.23	1154	20441.3	1154	22466.1
1155	5809.8	1155	3091.45	1155	16727	1155	7845.58	1155	7046.98	1155	8376.02	1155	20033.4	1155	22742.6
1156	6734.95	1156	3666.82	1156	18084.5	1156	9203.2	1156	7490.19	1156	7151.33	1156	22674.2	1156	24273.3
1157	6543.7	1157	3803.02	1157	20956.8	1157	9475.68	1157	9172.62	1157	9504.46	1157	24406.8	1157	24930.1
1158	5957.5	1158	2708.47	1158	22181.3	1158	9911.47	1158	9288	1158	11964.5	1158	23738.2	1158	22123.6
1159	5603	1159	2215.23	1159	20724.4	1159	8936.73	1159	8429.18	1159	11540.2	1159	22304.7	1159	19908.8
1160	5658.01	1160	2729.19	1160	26440.4	1160	10670.4	1160	9451.26	1160	12044	1160	21591.5	1160	20740.2
1161	5080.02	1161	2413.63	1161	28950.9	1161	11140.8	1161	7553.41	1161	9639.29	1161	19987.9	1161	18722.1
1162	4552.29	1162	2790.24	1162	31435.7	1162	12550	1162	5966.39	1162	7944.98	1162	20431.7	1162	19102.1
1163	3715.35	1163	1896.05	1163	31101.4	1163	12954.9	1163	5716.76	1163	7722.01	1163	21137.2	1163	18640.9
1164	3464.38	1164	2005.35	1164	30547.8	1164	11838.2	1164	4754.42	1164	5672.14	1164	21805.5	1164	18066.8
1165	3904.55	1165	2012.76	1165	25610.5	1165	11009	1165	3708.73	1165	4842.59	1165	18809.2	1165	16606.2
1166	4660.96	1166	2538.43	1166	25202.8	1166	10715.6	1166	3324.8	1166	5368.82	1166	14849.2	1166	12939.7
1167	4307.89	1167	3644.27	1167	22372.7	1167	11345.5	1167	1898.57	1167	4879.24	1167	11433.9	1167	11783.3
1168	3783.97	1168	2967.31	1168	18363.4	1168	11665.1	1168	1580.25	1168	5127.47	1168	11374.5	1168	11761.3
1169	1805.22	1169	821.199	1169	18958.9	1169	14107	1169	1979.54	1169	4639.47	1169	11996.5	1169	11190.5
1170	1156.02	1170	504.091	1170	20994.4	1170	13041.2	1170	2692.18	1170	3952.54	1170	12996.2	1170	10380.8
1171	1399.54	1171	228.936	1171	21438.5	1171	14248.5	1171	3360.45	1171	4129.57	1171	13104.7	1171	9870.09
1172	2569.74	1172	1129.78	1172	23128.7	1172	16320.9	1172	3788.43	1172	4296.33	1172	12552.1	1172	10079.8
1173	2816.96	1173	2215.47	1173	23171	1173	16682.5	1173	3815.19	1173	4635.07	1173	11645.4	1173	10143.4
1174	3463.24	1174	2995.67	1174	24978.9	1174	18645.7	1174	3910.7	1174	5294.48	1174	11993.7	1174	9554.39
1175	4643.77	1175	3190.77	1175	24388.7	1175	17792.2	1175	4438.85	1175	5423.19	1175	11090.1	1175	7843.86
1176	5337.93	1176	3872.23	1176	23227.3	1176	15617.8	1176	5294.06	1176	6302.47	1176	8862.39	1176	7618.26
1177	6585.32	1177	4900.81	1177	20688.2	1177	14800.7	1177	4915.86	1177	6714.81	1177	7667.64	1177	6137.77
1178	6994.32	1178	4740.74	1178	18488.9	1178	12785.7	1178	4826.6	1178	6194.72	1178	6478.13	1178	5022.93
1179	5914.03	1179	3096.25	1179	19809.5	1179	12344	1179	4500.75	1179	6189.94	1179	5765.25	1179	4446.25
1180	7117.23	1180	3763.41	1180	16041.7	1180	8175.13	1180	4497.66	1180	6955.4	1180	5300.67	1180	4524.88
1181	6566.67	1181	3628.1	1181	12343.6	1181	5488.01	1181	4478.7	1181	6626.36	1181	4455.04	1181	4188.34
1182	5681.24	1182	2492.12	1182	10137.1	1182	3617.57	1182	5577.92	1182	8221.3	1182	5626.56	1182	4433.88
1183	7319.3	1183	3739.15	1183	8941.31	1183	4345.1	1183	6384.31	1183	8851.72	1183	5876.71	1183	4425.39
1184	7517.67	1184	4312.14	1184	8191.22	1184	4756.93	1184	6941.69	1184	10541.9	1184	8376.67	1184	5686.84
1185	7212.32	1185	3236.58	1185	8278.47	1185	4207.91	1185	7235.14	1185	11189.2	1185	9297.2	1185	6679.57
1186	7272.19	1186	3270.64	1186	6791.01	1186	3808.54	1186	7249.09	1186	11474.8	1186	8375.92	1186	6659.18
1187	8740.26	1187	4198.76	1187	6649.42	1187	3342.06	1187	7362.97	1187	10481.5	1187	8653.21	1187	6570.26
1188	8789.39	1188	5087.1	1188	5104.68	1188	2079.26	1188	7821.06	1188	10372.8	1188	8135.64	1188	6048.28
1189	8348	1189	4639.39	1189	4825.92	1189	2794.9	1189	6725.02	1189	8304.13	1189	6302.19	1189	4419.33
1190	8807.95	1190	4946.66	1190	5734.23	1190	2196.88	1190	6611.5	1190	8052.83	1190	6854.1	1190	5079.74
1191	9045.74	1191	4326.47	1191	6323.1	1191	1996.02	1191	6893.31	1191	8623.28	1191	6550.07	1191	4369.5
1192	8544.75	1192	4404.34	1192	6841.71	1192	2567.83	1192	6265.46	1192	7302.47	1192	5080.48	1192	3191.54
1193	8724.88	1193	4352.96	1193	7407.66	1193	3376.76	1193	6043.84	1193	7580.1	1193	6972.52	1193	4698.93
1194	9417.77	1194	4330.3	1194	7996.51	1194	3923.06	1194	6215.02	1194	8637.55	1194	9121.78	1194	6738.5
1195	9335.88	1195	4181.26	1195	8048.2	1195	3100.24	1195	5922.09	1195	6774.33	1195	9884.56	1195	8195.52
1196	9646.22	1196	4936.1	1196	6890.08	1196	3667.84	1196	6244.99	1196	6823.74	1196	10573.2	1196	8543.44
1197	9429.34	1197	4876.47	1197	6999.34	1197	5064.4	1197	6000.69	1197	6402.82	1197	10699.2	1197	7953.74
1198	9741.51	1198	5753.89	1198	10399.8	1198	6814.15	1198	5578.31	1198	5792.68	1198	10128.7	1198	7191.47
1199	10819.5	1199	6765.1	1199	12150.3	1199	7725.49	1199	5729.37	1199	6384.67	1199	9354.14	1199	5703.1
1200	11217.8	1200	7147.25	1200	14129.8	1200	10711.6	1200	4824.46	1200	6106.62	1200	9348.15	1200	5794.26
1201	10800.2	1201	7069.82	1201	15670	1201	12712	1201	4351.23	1201	5215.35	1201	8136.73	1201	4605.61
1202	7389.46	1202	4915.09	1202	22290.5	1202	18423.6	1202	3713.12	1202	4088.84	1202	9018.76	1202	5168.48
1203	10830.6	1203	6305.02	1203	26085.9	1203	19916.8	1203	3564.12	1203	3752.61	1203	9439.4	1203	4587.38
1204	8718.92	1204	5272.59	1204	27417.8	1204	20814.1	1204	3285.99	1204	2748.58	1204	9755.1	1204	5741.67
1205	9668.82	1205	4516.53	1205	28776	1205	19191.9	1205	2749.82	1205	2998.48	1205	8419.96	1205	4309.09
1206	11178.2	1206	5864.39	1206	30721.9	1206	18690.2	1206	2375.13	1206	2926.12	1206	8753.97	1206	5889.45
1207	8350.27	1207	4754.19	1207	32076	1207	17330.9	1207	2469.96	1207	2839.42	1207	7954.77	1207	4477.37
1208	9860.48	1208	5012.74	1208	33777.7	1208	17316.2	1208	2418.44	1208	2708.54	1208	8901.1	1208	6162.81
1209	9084.05	1209	4154.53	1209	31027.6	1209	16595.9	1209	3212.23	1209	4716.63	1209	9442.66	1209	7899.13
1210	8504.69	1210	3346.98	1210	31018.1	1210	18037	1210	3959.1	1210	6473.67	1210	8843.75	1210	9341.19
1211	6515.97	1211	2913.77	1211	29585.1	1211	18502.4	1211	4653.38	1211	9157.84	1211	11085.4	1211	12806.9
1212	8624.67	1212	3845.61	1212	27521.7	1212	17354.1	1212	3927.1	1212	6295.2	1212	11407.7	1212	13057.2
1213	8987.81	1213	4223.59	1213	26062.3	1213	16909.5	1213	4533.01	1213	5714.13	1213	12011.2	1213	12337.6
1214	8092.08	1214	3867.47	1214	22876	1214	13719	1214	4984.47	1214	5417.39	1214	13289.9	1214	12432.3
1215	10499.5	1215	5332.45	1215	23048.5	1215	13423.5	1215	7116.73	1215	7645.79	1215	12802.8	1215	10800.9
1216	8343.44	1216	4649.42	1216	20346.9	1216	12284.1	1216	6820.23	1216	7668.2	1216	12477.8	1216	10250.3
1217	8865.99	1217	4844.22	1217	21585.5	1217	10674.6	1217	7552.97	1217	8668.06	1217	12417.4	1217	9404.23
1218	11055.1	1218	5647.46	1218	16823.4	1218	9007.86	1218	7454.9	1218	8225.71	1218	13337.8	1218	11645.3
1219	12280.3	1219	5982.88	1219	22136.3	1219	9885.58	1219	8150.8	1219	9744.83	1219	14466.5	1219	12559.9
1220	12257.2	1220	6230.64	1220	23481.4	1220	10319.1	1220	7346.05	1220	8783.7	1220	15407.6	1220	12943.9
1221	13037.8	1221	6640.7	1221	23199	1221	9377.17	1221	6726	1221	7758.57	1221	15994.9	1221	15706.6
1222	12172.3	1222	6108.05	1222	18443.5	1222	8964.66	1222	6117.65	1222	7673.38	1222	15145.2	1222	16691.3
1223	9909.06	1223	4641.56	1223	22392.3	1223	10542.4	1223	6985.11	1223	8511.79	1223	12759.5	1223	12694.2
1224	9036.76	1224	4750.95	1224	23407.7	1224	10830.4	1224	6109.74	1224	6829.2	1224	12680.4	1224	13261.9
1225	8998.75	1225	4866.05	1225	21029.5	1225	10679.5	1225	6180.98	1225	5499.04	1225	13042.5	1225	12847.6
1226	8768.99	1226	5128.9	1226	23349	1226	12627.7	1226	7301.08	1226	7270.71	1226	12325.2	1226	10915.8
1227	8471.6	1227	5735.5	1227	17763.4	1227	8773.04	1227	7992.34	1227	8627.36	1227	13151	1227	10736.9
1228	7379.78	1228	4252.53	1228	20176.9	1228	10951.2	1228	8062.97	1228	7982.43	1228	12994.1	1228	11772.3
1229	8526.45	1229	5203.2	1229	22250.5	1229	11335.8	1229	7264.23	1229	6715.56	1229	13280.6	1229	11951.7
1230	10104	1230	5845.78	1230	17553.3	1230	5844.78	1230	7290.06	1230	7817.06	1230	14271.8	1230	13576.7
1231	11319.5	1231	6325.44	1231	21030.2	1231	8533.48	1231	6423.37	1231	7218.34	1231	14956.9	1231	14652.7
1232	10600.1	1232	5026.24	1232	22462.2	1232	10082.3	1232	7102.55	1232	7772.64	1232	14442.8	1232	13966.4
1233	10671.5	1233	5041.67	1233	22294.2	1233	11400.6	1233	6858.77	1233	7430.73	1233	13745.4	1233	14266.4
1234	10470.1	1234	4652.06	1234	22248.6	1234	12695.9	1234	5428.14	1234	6415.4	1234	11380	1234	13056.5
1235	11479.5	1235	4265.19	1235	25337.2	1235	16043.7	1235	5429.59	1235	7021.44	1235	10674.6	1235	10828.7
1236	11773.5	1236	4282.51	1236	21598	1236	12123	1236	6053.58	1236	9934.9	1236	10890.9	1236	9494.22
1237	13534.1	1237	5009.05	1237	14854.6	1237	6695.07	1237	6244.07	1237	9643.07	1237	10302	1237	9929.8
1238	12023.3	1238	4442.61	1238	17264.7	1238	8162.88	1238	6478.15	1238	8291.41	1238	8888.33	1238	9016.58
1239	11137.2	1239	4051.82	1239	16647.4	1239	7293.2	1239	6829.39	1239	6804.89	1239	7258.43	1239	7048.67
1240	11671.3	1240	4993.39	1240	19810	1240	9469.84	1240	7347.46	1240	6870.92	1240	7316.74	1240	6777.69
1241	11915.2	1241	5993.25	1241	24224.5	1241	11088.1	1241	7367.64	1241	7433.51	1241	7158.97	1241	7000.81
1242	11604	1242	6175.25	1242	25527.5	1242	10902.3	1242	7765.09	1242	7527.27	1242	5894.17	1242	5346.11
1243	9702.86	1243	6147.43	1243	25135.9	1243	10659.5	1243	7591.18	1243	7309.13	1243	5354.89	1243	4756.35
1244	10745.1	1244	6536.28	1244	25218.2	1244	10615.5	1244	7209.49	1244	8205.7	1244	5712.82	1244	5053.28
1245	11701.3	1245	7433.39	1245	27774.7	1245	11800.7	1245	6641.15	1245	7323.02	1245	6776.1	1245	5949.73
1246	12762.2	1246	8468.73	1246	23966.6	1246	8892.92	1246	5922.44	1246	7302.15	1246	7668.26	1246	6550.98
1247	13079.7	1247	8430.55	1247	25747.5	1247	10376.7	1247	5076.64	1247	8578.48	1247	8111.97	1247	7458.13
1248	13737.3	1248	8894.2	1248	27570.8	1248	11411.1	1248	5372.42	1248	9052.26	1248	6580.8	1248	3919.78
1249	14862.3	1249	8679.5	1249	27338.2	1249	11145.9	1249	6601.61	1249	9378.36	1249	7033.53	1249	5362.29
1250	15526.5	1250	8525.79	1250	26935.7	1250	9926.9	1250	6737.46	1250	8134.58	1250	6905.32	1250	4320.23
1251	17402	1251	9399.89	1251	26702.2	1251	10124	1251	7192.82	1251	11037.6	1251	7631.89	1251	5866.69
1252	18517.1	1252	9180.95	1252	27090.1	1252	10658.6	1252	6552.33	1252	10774.8	1252	9896.32	1252	7032.68
1253	16989.1	1253	9677.33	1253	28445.7	1253	12002.9	1253	5370.28	1253	7809.77	1253	10568.3	1253	9399.98
1254	17610.2	1254	8832.05	1254	22908.2	1254	8066.58	1254	4273.04	1254	6108.31	1254	10339.4	1254	11514.6
1255	14559.9	1255	8087.1	1255	26487.7	1255	9917.81	1255	4288.85	1255	5600.38	1255	9371.74	1255	8050.3
1256	13129.4	1256	7783.82	1256	29571.8	1256	12464.6	1256	4519.92	1256	6109.95	1256	9837.48	1256	7562.83
1257	12849.8	1257	9231.28	1257	27546.2	1257	11343	1257	5177.06	1257	7481.82	1257	9351.18	1257	8949.5
1258	13383.3	1258	8712.85	1258	19309	1258	6105.03	1258	5192.26	1258	8585.53	1258	8975.59	1258	11999.1
1259	12796.7	1259	8538.6	1259	23041.2	1259	8306.94	1259	5647.21	1259	8471.44	1259	11123.4	1259	12288
1260	12826.4	1260	9603.27	1260	18829.6	1260	5725.6	1260	5849.47	1260	7084.7	1260	10133.8	1260	13538.9
1261	12468.6	1261	9919.6	1261	19164.9	1261	5577.93	1261	6210.89	1261	7132.7	1261	10211.3	1261	12587
1262	12204	1262	9291.76	1262	18268.2	1262	4918.39	1262	7584.93	1262	14380.4	1262	11148.6	1262	14475.5
1263	12972.8	1263	9908.67	1263	17812	1263	4424.83	1263	7641.65	1263	15007.8	1263	11566.2	1263	13715.2
1264	13208.7	1264	8969.48	1264	17990.4	1264	4896.66	1264	7747.86	1264	18317.7	1264	11361.1	1264	12183.1
1265	15242.7	1265	10626.3	1265	18766.9	1265	4698.4	1265	7646.67	1265	15709.5	1265	12157.6	1265	11122.7
1266	14002.8	1266	11598.1	1266	19567.7	1266	8632.59	1266	7036.31	1266	11161.8	1266	11585.5	1266	12885.2
1267	12088.6	1267	9997.23	1267	20085.5	1267	7918.33	1267	6724.06	1267	8469.35	1267	12482.5	1267	12620.2
1268	13909.7	1268	11415	1268	19922.7	1268	8317.85	1268	6476.84	1268	7189.79	1268	11346.3	1268	12159.4
1269	10797.1	1269	8513.37	1269	23181.9	1269	12747.3	1269	5964.02	1269	7813.75	1269	10211.1	1269	12116.2
1270	9663.39	1270	6512.82	1270	24630	1270	12681.2	1270	6000.87	1270	7240.14	1270	10731.1	1270	12546.1
1271	10244.5	1271	7352.04	1271	24404.2	1271	13100.7	1271	6463.77	1271	8898.91	1271	12167.1	1271	15770.9
1272	9936.45	1272	6660.19	1272	27257.9	1272	15551.6	1272	6189.15	1272	7896.29	1272	12932.1	1272	19314.5
1273	10180.1	1273	6400.75	1273	27625.2	1273	15596.2	1273	6654.47	1273	8126.19	1273	14079.7	1273	19174.7
1274	10201.1	1274	7568.23	1274	27155.2	1274	16248.4	1274	6986.55	1274	8675.19	1274	13532.2	1274	14945.6
1275	10685.9	1275	5928.29	1275	27103.7	1275	16969	1275	6500.68	1275	9326.36	1275	12396.5	1275	13824
1276	11387.6	1276	5698.1	1276	27381	1276	16857.5	1276	5853.98	1276	8705.89	1276	10870.3	1276	13532.6
1277	11782.8	1277	7037.74	1277	29300.8	1277	17516.2	1277	6473.46	1277	8735.72	1277	9330.03	1277	11090.4
1278	12007.3	1278	6860.07	1278	32824.1	1278	18560.6	1278	5348.74	1278	7944.12	1278	9675.6	1278	12342.9
1279	13110.8	1279	8957.04	1279	33085.4	1279	17454	1279	5590.25	1279	8422.33	1279	9709.98	1279	10594.6
1280	13110.8	1280	8675.37	1280	32139.6	1280	15433	1280	6169.39	1280	10366.6	1280	9726.93	1280	9565.17
1281	12771	1281	9738.71	1281	33051.8	1281	15552.4	1281	5755.3	1281	8758.01	1281	9592.87	1281	9471.18
1282	11237.2	1282	8799.27	1282	29930	1282	13992.7	1282	6199.45	1282	7679.05	1282	10358.2	1282	9541.51
1283	12536.4	1283	9264.98	1283	30187.2	1283	16904	1283	6605.11	1283	10361.3	1283	10255.5	1283	9618.21
1284	11609.6	1284	8975.07	1284	35496	1284	19057	1284	5707.2	1284	8143	1284	9671.01	1284	9741.06
1285	12183.4	1285	9276.51	1285	30585.6	1285	16877.9	1285	5518.8	1285	6970.73	1285	8861.72	1285	8005.99
1286	12172	1286	8650.36	1286	31215.7	1286	18845.6	1286	7340.31	1286	14236.1	1286	8299.28	1286	7826.34
1287	12154.4	1287	7974.91	1287	31360.4	1287	20173.6	1287	7732.61	1287	16043.3	1287	8087.69	1287	6091.12
1288	10173.8	1288	7560.57	1288	31984.4	1288	20984.6	1288	7636.62	1288	14973.3	1288	7404.27	1288	5625.65
1289	9642.16	1289	6992.08	1289	30111.9	1289	20529.7	1289	7817.29	1289	14005.8	1289	7680.03	1289	4755.4
1290	10813.6	1290	7942.12	1290	28923.7	1290	19687.4	1290	7307.36	1290	13007.8	1290	8458.73	1290	6268.41
1291	10070.6	1291	8070.5	1291	29386.2	1291	22929.8	1291	7142.19	1291	11830.9	1291	8685.33	1291	6451.28
1292	9758.3	1292	7929.02	1292	28463.7	1292	23320.6	1292	7647.65	1292	12972.1	1292	8830.95	1292	6853.59
1293	10307.2	1293	10511.7	1293	25276.3	1293	22694.8	1293	7349.64	1293	12818.1	1293	11243.4	1293	10678.2
1294	10361.2	1294	9882.97	1294	23902	1294	21195	1294	7411.44	1294	13041.8	1294	13090.9	1294	11284.7
1295	11059.9	1295	10699.2	1295	21476.7	1295	19761.5	1295	7997.71	1295	12884.7	1295	15023.8	1295	13624.5
1296	10143	1296	7141.32	1296	19017.2	1296	19950.4	1296	7854.03	1296	11663.3	1296	14773.3	1296	12506.7
1297	11382.2	1297	8316.99	1297	18738.8	1297	21046.4	1297	7751.74	1297	11767.4	1297	16430.1	1297	13889.7
1298	12461.6	1298	7780.04	1298	16896.8	1298	18666.4	1298	8480.93	1298	10969.8	1298	14433.8	1298	12171.6
1299	10017.8	1299	6476.85	1299	15715.9	1299	15332	1299	8342.76	1299	9504.99	1299	14429.8	1299	12199
1300	7713.15	1300	6430.84	1300	13906.9	1300	12282.6	1300	8283.29	1300	10442.1	1300	14630.2	1300	10767.3
1301	6898.41	1301	6196.37	1301	19355.8	1301	17273.5	1301	8402	1301	12821.1	1301	13635.4	1301	11863.7
1302	6495.02	1302	6161.96	1302	15849.4	1302	13522.6	1302	8029.69	1302	12120	1302	12388.8	1302	12486
1303	5733.29	1303	5455.8	1303	21921.1	1303	18359.3	1303	7280.8	1303	11242.4	1303	9726.17	1303	9585.74
1304	6323.71	1304	6202.97	1304	21106.6	1304	16973.3	1304	6498.78	1304	9554.94	1304	10376.4	1304	11400.4
1305	6253.72	1305	6234.13	1305	19192.1	1305	16255.8	1305	5459.88	1305	7407.29	1305	8386.68	1305	8469.52
1306	5943.53	1306	6232.51	1306	17172.3	1306	14339.4	1306	5187.88	1306	6694.89	1306	8924.06	1306	8528.46
1307	5298.03	1307	5058.83	1307	16071.8	1307	12097.5	1307	3856.01	1307	5958.6	1307	10267.7	1307	9379.01
1308	5826.11	1308	5433.95	1308	15429.4	1308	12218.8	1308	2880.09	1308	3632.97	1308	12512.4	1308	10197.6
1309	5763.44	1309	5894.52	1309	17315.3	1309	11552.8	1309	3261.48	1309	3806.37	1309	12330.6	1309	9023.14
1310	6084.75	1310	5763.45	1310	23426.4	1310	18612.2	1310	3420.26	1310	3892.85	1310	11736.4	1310	9761.4
1311	7074.2	1311	4718.17	1311	20201.8	1311	14666.3	1311	4520.6	1311	3597.62	1311	12107.5	1311	9969.9
1312	6447.36	1312	3795.22	1312	20217.7	1312	13083.7	1312	4435.85	1312	2955.4	1312	10064	1312	7743.69
1313	6165.14	1313	3647.16	1313	20645.6	1313	12221.5	1313	4879.66	1313	3913.94	1313	7444.9	1313	5473.35
1314	7299.69	1314	4386.63	1314	18231.3	1314	10231.7	1314	6054.64	1314	5210.79	1314	7371.81	1314	5825.25
1315	8947.96	1315	4603.41	1315	17832.7	1315	8729.53	1315	5970.27	1315	5579.82	1315	6837.05	1315	5015.4
1316	8480.11	1316	4605.19	1316	16193.5	1316	8257.76	1316	6932.14	1316	8279.05	1316	6051.11	1316	4357.82
1317	9163.45	1317	4562.29	1317	15078.3	1317	7209.65	1317	6361.08	1317	8573.58	1317	5674.42	1317	3604.01
1318	8410.72	1318	4318.34	1318	12921.5	1318	6730.68	1318	7512.85	1318	8205.91	1318	5286.78	1318	3697.45
1319	8256	1319	4249.84	1319	12657.2	1319	6707.98	1319	6622.92	1319	8172.23	1319	4734.74	1319	3410.87
1320	7490.91	1320	4746.62	1320	11483.8	1320	5784.35	1320	6430.59	1320	7788.4	1320	4064.16	1320	2805.09
1321	7148.78	1321	4886.38	1321	12913.6	1321	6378.87	1321	6572.65	1321	8375.23	1321	4288.26	1321	2848.86
1322	6170.43	1322	4732.69	1322	12783	1322	7296.4	1322	7792.8	1322	7551.59	1322	5574.09	1322	3077.11
1323	6838.78	1323	5763.05	1323	12368.4	1323	7371.59	1323	6022.68	1323	5260.54	1323	5842.98	1323	3617.9
1324	6831.24	1324	5287.49	1324	10420	1324	5343.19	1324	5676.47	1324	4099.52	1324	6849.31	1324	4959.24
1325	7184.26	1325	4860.38	1325	10605.3	1325	4840.03	1325	5261.27	1325	4098.12	1325	8173.53	1325	6129.34
1326	6519.27	1326	4320.65	1326	9491.97	1326	4422.81	1326	5566.97	1326	5861.97	1326	9171.74	1326	7523.82
1327	5938.35	1327	3852.06	1327	9899.77	1327	4940.18	1327	5512.22	1327	6074.21	1327	9763.13	1327	8234.7
1328	5670.93	1328	3767.81	1328	11239.7	1328	7009.92	1328	5996.21	1328	7652.98	1328	9651.35	1328	7613.63
1329	6980.8	1329	4983.73	1329	10188.6	1329	5208.68	1329	6605.26	1329	11135.9	1329	9991.19	1329	8512.26
1330	6123.47	1330	4720.58	1330	10355.8	1330	5138.49	1330	6746.7	1330	13920.7	1330	8840.53	1330	7818.29
1331	5417.95	1331	3907.86	1331	12901.7	1331	8212.7	1331	6848.6	1331	12864.1	1331	9362.67	1331	8744.1
1332	5885.13	1332	3966.49	1332	10207.1	1332	6616.68	1332	6432.17	1332	11933.9	1332	7311.25	1332	5802.72
1333	6857.49	1333	5888.9	1333	8738.84	1333	5155.1	1333	5843.55	1333	11453	1333	8358.21	1333	6578.93
1334	8561.29	1334	7200.93	1334	8816.6	1334	4369.7	1334	5929.26	1334	10519.3	1334	6455.59	1334	4569.27
1335	9224.91	1335	7282.1	1335	8787.23	1335	3324.08	1335	6320.46	1335	10002.1	1335	7612.44	1335	5177.5
1336	9670.7	1336	6564.42	1336	10026.5	1336	3898	1336	6201.99	1336	9655.87	1336	10197.8	1336	7485.73
1337	8482.36	1337	5273.38	1337	10633	1337	4922.51	1337	6779.38	1337	10783.2	1337	10775.1	1337	9054
1338	9555.26	1338	5449.51	1338	10205.7	1338	6828.43	1338	7775.62	1338	10431.6	1338	11849.8	1338	11519
1339	7180.12	1339	4894.25	1339	10083.5	1339	7747.66	1339	8691.75	1339	10943.6	1339	11938.7	1339	11635.3
1340	6127.66	1340	3960.98	1340	9895.99	1340	6901.42	1340	8067.04	1340	9009.02	1340	11541	1340	12947.4
1341	5635.71	1341	4419.13	1341	10263.1	1341	6685.79	1341	8739.01	1341	8876.97	1341	11472.1	1341	11482.2
1342	5804.06	1342	4093.32	1342	10615.3	1342	8174.54	1342	8749.49	1342	10191.9	1342	11319.3	1342	10671.7
1343	8163.86	1343	4808.94	1343	11017.7	1343	6792.96	1343	7452.42	1343	8170.42	1343	12219.9	1343	12364.5
1344	7024.55	1344	4180.62	1344	10503.4	1344	7106.19	1344	6920.11	1344	6320.97	1344	12946.9	1344	14288.9
1345	5599.04	1345	2381.77	1345	10835.3	1345	6899.77	1345	7694.58	1345	7591.2	1345	12829	1345	14404.1
1346	7229.74	1346	3579.04	1346	11261.4	1346	7229.98	1346	6518.28	1346	5953.71	1346	13697.8	1346	13478.9
1347	6934.32	1347	4563.59	1347	10537.1	1347	7693.07	1347	5428.24	1347	4924.34	1347	14805.3	1347	13850.8
1348	6611.66	1348	3384.98	1348	11139.6	1348	8084.66	1348	7489.06	1348	6590.88	1348	14036.2	1348	15537.7
1349	6189.41	1349	3870.26	1349	11428.1	1349	8798.66	1349	7383.42	1349	6549.05	1349	13339.5	1349	15485.8
1350	5913.1	1350	3996.99	1350	8787.04	1350	5814.55	1350	7929.95	1350	6140.7	1350	13918.3	1350	14374.7
1351	6167.2	1351	3550.9	1351	10015.7	1351	7366.36	1351	11099.5	1351	9026.23	1351	13985.3	1351	15017.2
1352	6579.57	1352	4879.51	1352	11369.6	1352	10031.3	1352	9195.72	1352	6223.12	1352	14609.9	1352	15479.5
1353	6162.96	1353	4670.06	1353	11363.2	1353	11392.1	1353	8489.46	1353	5202.4	1353	13450.6	1353	15763.1
1354	6779.79	1354	4755.17	1354	9362.14	1354	8886.94	1354	9567.66	1354	5351	1354	14238.7	1354	16933.7
1355	6867.62	1355	4948.3	1355	8225.57	1355	7534.68	1355	8706.89	1355	4727.64	1355	13107	1355	14599.6
1356	6708.91	1356	4582.8	1356	7938.88	1356	7756.99	1356	9566.44	1356	6107.6	1356	13665.8	1356	15860.9
1357	5205.87	1357	3774.19	1357	7691.06	1357	7221.45	1357	10856	1357	7532.33	1357	13212.3	1357	12806.2
1358	4037.88	1358	2255.18	1358	8873.93	1358	8992.81	1358	10590.4	1358	7700.03	1358	13779.9	1358	13523
1359	6447.5	1359	5575.48	1359	9973.12	1359	10229.1	1359	10688.3	1359	7363.85	1359	13045.5	1359	15178.7
1360	5064.58	1360	3901.05	1360	11124.8	1360	8684.29	1360	10248.6	1360	6437.67	1360	12575.6	1360	14515.2
1361	3774.26	1361	3169.11	1361	11093.9	1361	8494.18	1361	11593.6	1361	9043.61	1361	11464.8	1361	13954.9
1362	3400.35	1362	2385.37	1362	12866	1362	9721.37	1362	10355.7	1362	7847.45	1362	10801.1	1362	11640
1363	3868.34	1363	2215.75	1363	13897.2	1363	12525.3	1363	10019.4	1363	6855.85	1363	11282.4	1363	12454.5
1364	4818.87	1364	3056.11	1364	11232.8	1364	9518.71	1364	10861	1364	8547.03	1364	12034.8	1364	13901.9
1365	4365.8	1365	2681.8	1365	11185.6	1365	7750.64	1365	11120.2	1365	9223.8	1365	13479.7	1365	14895.8
1366	4427.74	1366	3321.17	1366	11942	1366	7048.81	1366	10309.3	1366	7629.32	1366	12095.9	1366	17247.8
1367	4776.02	1367	3982.05	1367	11160.9	1367	6423.14	1367	9614.27	1367	5813.5	1367	10116.8	1367	13317.7
1368	5061.59	1368	3860.87	1368	10081.9	1368	6253.85	1368	9367.2	1368	5044.87	1368	8565.91	1368	8424.72
1369	5084.69	1369	4923.25	1369	9512.23	1369	5736.51	1369	9320.34	1369	5134.89	1369	9084.13	1369	7822.13
1370	6753.25	1370	7005.16	1370	7565.28	1370	4495.7	1370	8923.94	1370	5476.17	1370	9434.72	1370	9800.22
1371	8156.63	1371	7777.35	1371	7668.89	1371	4181.8	1371	8015.05	1371	5324.93	1371	9397.25	1371	9144.12
1372	8926.3	1372	8783.93	1372	8514.3	1372	4538.19	1372	7982.36	1372	5321.42	1372	9836	1372	10671.9
1373	9074.21	1373	9689.21	1373	8124	1373	3733.19	1373	8870.78	1373	7310.3	1373	10329.9	1373	10914.5
1374	7293.19	1374	7498.02	1374	8444.09	1374	4455.98	1374	7576.6	1374	6198.55	1374	11260	1374	11204.4
1375	7054.48	1375	7148.15	1375	9007.08	1375	4708.54	1375	6710.63	1375	4985.75	1375	12780.3	1375	13813.3
1376	6924.74	1376	6603.91	1376	9675.44	1376	4862.88	1376	6669.85	1376	6465.07	1376	12013.7	1376	13653.4
1377	7263.04	1377	5963.83	1377	10488.2	1377	4897.33	1377	5937.91	1377	4811.6	1377	11944.2	1377	11888.1
1378	8787.82	1378	6745.22	1378	10862.9	1378	4725.05	1378	5584.14	1378	4545.29	1378	12824.4	1378	12908.5
1379	9277.71	1379	7368.62	1379	12550.2	1379	6324.55	1379	5557.99	1379	4114.96	1379	11025	1379	11167.9
1380	9201.08	1380	7336	1380	11092.9	1380	6926.55	1380	6047.74	1380	4320.28	1380	11367.7	1380	13867.2
1381	9327.58	1381	7173.54	1381	9427.45	1381	6488.29	1381	6247.32	1381	3709.01	1381	11474	1381	14206.3
1382	9072.91	1382	7133.81	1382	9345.35	1382	5913.59	1382	5919.72	1382	3234.42	1382	12032.1	1382	14199.1
1383	8380.4	1383	5433.57	1383	8823.78	1383	4592.41	1383	6232.43	1383	3040.14	1383	11119.1	1383	10894.1
1384	8463.05	1384	5928.83	1384	8412.23	1384	3619.04	1384	5110.5	1384	2507.96	1384	11469.9	1384	11370.7
1385	8800.33	1385	5882.09	1385	8430.42	1385	3731.66	1385	4938.75	1385	3113.89	1385	11079.6	1385	8887.46
1386	8540.62	1386	5151.96	1386	7717.76	1386	4593.54	1386	4636.74	1386	4577.12	1386	10632.1	1386	10134.3
1387	10766.4	1387	7616.73	1387	7291.54	1387	4564.48	1387	4591.3	1387	5050.31	1387	11225.3	1387	10910.1
1388	9582.13	1388	6216.46	1388	8050.92	1388	4195.7	1388	4320.08	1388	4512.41	1388	11076.3	1388	10894.2
1389	10009.2	1389	7295.26	1389	8331.9	1389	5385.31	1389	3482.16	1389	3204.84	1389	11407.6	1389	10084.3
1390	11181.5	1390	9641.38	1390	8853.51	1390	5007.74	1390	3403.49	1390	2450.42	1390	10743.1	1390	9253.73
1391	10846	1391	9506.07	1391	10558.8	1391	6373.67	1391	3749.95	1391	2008.52	1391	11698.5	1391	11072.8
1392	11218.2	1392	10341.1	1392	11969.7	1392	7484.01	1392	5205.04	1392	3160.22	1392	11118.7	1392	9953.18
1393	10579.4	1393	8811.09	1393	11638.7	1393	7854.92	1393	5997.39	1393	3877.98	1393	10507.2	1393	9561.26
1394	10551.1	1394	10496.1	1394	13361.9	1394	8748.36	1394	7766.65	1394	4554.5	1394	10660.9	1394	11109.9
1395	11392.7	1395	9755.05	1395	13105.1	1395	7728.63	1395	8988.69	1395	6688.1	1395	9669.71	1395	10586.3
1396	11335.8	1396	9280.86	1396	13139.5	1396	7381.77	1396	9223.15	1396	6405.33	1396	11177.2	1396	11038.2
1397	11608	1397	8153.73	1397	13414.8	1397	6397.33	1397	9968.94	1397	7420.52	1397	10473.1	1397	9259.84
1398	11833.9	1398	7907.3	1398	11378	1398	4421.64	1398	11137.8	1398	8516.72	1398	11621.9	1398	10754.5
1399	11764.3	1399	8585.21	1399	12018.6	1399	4700.39	1399	11271.9	1399	8598.41	1399	12147	1399	12788.9
1400	12299	1400	9857.2	1400	12510	1400	5242.9	1400	12474.4	1400	9500.61	1400	13241.7	1400	13383.8
1401	11151.5	1401	8090.57	1401	11050.8	1401	4193.85	1401	14809.8	1401	10706.9	1401	12619.5	1401	12007
1402	8351.21	1402	4120.19	1402	11755	1402	4467.71	1402	14841	1402	10456.4	1402	12549.3	1402	11185
1403	5862.73	1403	3258.34	1403	11692.1	1403	5560.01	1403	12361.8	1403	8716.99	1403	12552.8	1403	11109.1
1404	6850.77	1404	4394.75	1404	11294.5	1404	4467.59	1404	12805.9	1404	9313.48	1404	12045.2	1404	11506.2
1405	6913.54	1405	4856.31	1405	10531.8	1405	4692.7	1405	12297.7	1405	11336.9	1405	12827.3	1405	11851.3
1406	7389.31	1406	5247.84	1406	10414.1	1406	5164.09	1406	13213.5	1406	11778.2	1406	12563.8	1406	11867.4
1407	7384.69	1407	6022.44	1407	11293.8	1407	6087.28	1407	13499.5	1407	10100.8	1407	11071.3	1407	11433.9
1408	6901.45	1408	5959.88	1408	10720.5	1408	6965.2	1408	12933.5	1408	7684.81	1408	10533.8	1408	9180.67
1409	6633.18	1409	5776.59	1409	10635.2	1409	7096.33	1409	11088.1	1409	6001.68	1409	10967.4	1409	10491.3
1410	7421.76	1410	6074.18	1410	10720.5	1410	6939.48	1410	8540.64	1410	4995.17	1410	12337.7	1410	14488
1411	7940.18	1411	5353.4	1411	10710.3	1411	7057.3	1411	7460.82	1411	4540.8	1411	11737.1	1411	16368.6
1412	8577.77	1412	5725.59	1412	10339.3	1412	6569.55	1412	8043.44	1412	4560.45	1412	11484.5	1412	16408.6
1413	7510.31	1413	5370.47	1413	9772.23	1413	5403.51	1413	9111.94	1413	5027.62	1413	10339.6	1413	14286.5
1414	7249.71	1414	4782.42	1414	9305.6	1414	5586.81	1414	8458.18	1414	4456.5	1414	9504.82	1414	12087.8
1415	5703.82	1415	5052.23	1415	9326.8	1415	5774.65	1415	8102.21	1415	4535.83	1415	11008.5	1415	13055.4
1416	5306.1	1416	5731.56	1416	9763.28	1416	6160.68	1416	8274.36	1416	4711.83	1416	11756.1	1416	15133.8
1417	4430.37	1417	4970.34	1417	9961.83	1417	5275.43	1417	7437.52	1417	4270.09	1417	12680.4	1417	15259.2
1418	4113.15	1418	5964.38	1418	9634.96	1418	6086.5	1418	7498.05	1418	4144.42	1418	11468.8	1418	15253.7
1419	5283.03	1419	5658.31	1419	9938.03	1419	6264.16	1419	8365	1419	3460.55	1419	12865.6	1419	17670.3
1420	4534.45	1420	5290.01	1420	10188.6	1420	6159.31	1420	9565.27	1420	4048.5	1420	13908	1420	18843
1421	5236.23	1421	5109.88	1421	9650.67	1421	4431.35	1421	9693.58	1421	3989.07	1421	12560.6	1421	14739.3
1422	4962.13	1422	5285.75	1422	8355.73	1422	4943.29	1422	12262.7	1422	5830.77	1422	11989.6	1422	13495.6
1423	6828.79	1423	5427.71	1423	7422	1423	4996.78	1423	12616.7	1423	7487.24	1423	10036	1423	10922.7
1424	6749.21	1424	4455.07	1424	6895.07	1424	5110.33	1424	11597.3	1424	7264.61	1424	8671.15	1424	10051.9
1425	6785.7	1425	4496.7	1425	6287.86	1425	4145.34	1425	9018.38	1425	6164.16	1425	8602.7	1425	11407
1426	5778.51	1426	4709.62	1426	7659.4	1426	4599.59	1426	7958.06	1426	5300.24	1426	8480.43	1426	11465.7
1427	5513.86	1427	4287.74	1427	7506.61	1427	4223.07	1427	7578.27	1427	4314.71	1427	6386.1	1427	10159.8
1428	3747.24	1428	4244.12	1428	9041.75	1428	4502.32	1428	7659.73	1428	5041.23	1428	7367.16	1428	10717.3
1429	3858.44	1429	4139.37	1429	8752.48	1429	4074.59	1429	7904.71	1429	4984.52	1429	7789.94	1429	9566.77
1430	2653.96	1430	4702.18	1430	10331	1430	4497.05	1430	7781.47	1430	5083.14	1430	9245.43	1430	10228.4
1431	2911.76	1431	5456.89	1431	9542.3	1431	4386.4	1431	8099.24	1431	4428.01	1431	9582.17	1431	9638.32
1432	3879.23	1432	6243.33	1432	8577.19	1432	3384.91	1432	8995	1432	4184.74	1432	10048.4	1432	9046.17
1433	3418.23	1433	4351.14	1433	7508.23	1433	4398.13	1433	8905.68	1433	4339.4	1433	10056.6	1433	8228.78
1434	4028.63	1434	4182.51	1434	7295.16	1434	4130.95	1434	9324.76	1434	4922.76	1434	10052.6	1434	8275.66
1435	5262.53	1435	4987.52	1435	7056.69	1435	3298.42	1435	7308.11	1435	4706.61	1435	10059	1435	8509
1436	5964.84	1436	6148.98	1436	6593.9	1436	3291.22	1436	6356.33	1436	4573.53	1436	10678.1	1436	8019.11
1437	8143.18	1437	7948.03	1437	6737.15	1437	2737.72	1437	5999.56	1437	4311.43	1437	10206.5	1437	9129.13
1438	8760.7	1438	7858.87	1438	5785.74	1438	2603.58	1438	5840.67	1438	4242.66	1438	9607.7	1438	8679.37
1439	9352.78	1439	7563.77	1439	6397.56	1439	3268.45	1439	6374.62	1439	4045.41	1439	9291.17	1439	10108.8
1440	8204.5	1440	6892.1	1440	6147.5	1440	3138.58	1440	6893.77	1440	4056.26	1440	9344.89	1440	9644.65
1441	7412	1441	7039.57	1441	4441.18	1441	1914.66	1441	7510.1	1441	4567.16	1441	8550.56	1441	8198.17
1442	7738.22	1442	6361.31	1442	4873.48	1442	2110.98	1442	7639.72	1442	4455.66	1442	9504.29	1442	9100.3
1443	7602.51	1443	6074.2	1443	5457.03	1443	1750.93	1443	8942.18	1443	4264.16	1443	8455.22	1443	9104.44
1444	7991.62	1444	7544.1	1444	5926.53	1444	1986.28	1444	10861.7	1444	6730.54	1444	7125.69	1444	7742.96
1445	8977.78	1445	8996.13	1445	5141.07	1445	2384.34	1445	10199.9	1445	5350.93	1445	7869.34	1445	8467.54
1446	10058.9	1446	11134.4	1446	5382.77	1446	1633.18	1446	10843.8	1446	6564.28	1446	7894.92	1446	8356.3
1447	9966.98	1447	11505.6	1447	6342.69	1447	2490.58	1447	10234.2	1447	6127.74	1447	7721.77	1447	6206.92
1448	10763.4	1448	11738.7	1448	7080.28	1448	4003.34	1448	10768.8	1448	5661.03	1448	6972.73	1448	5619.59
1449	10813.4	1449	12373.1	1449	6384.07	1449	3873.78	1449	11473.3	1449	5958.38	1449	7726.84	1449	6249.55
1450	10346.4	1450	11060.2	1450	6900.74	1450	3703.78	1450	11670.3	1450	6093.08	1450	9328.16	1450	7773.92
1451	9385.49	1451	9993.03	1451	7660.36	1451	3555.77	1451	14552.1	1451	8221.65	1451	10818	1451	10695.4
1452	8995.36	1452	9758.76	1452	7690.97	1452	4369.19	1452	14518.1	1452	8484.32	1452	11822.8	1452	12920.1
1453	8309.19	1453	8438.54	1453	6745.67	1453	3642.35	1453	16085	1453	11349.5	1453	12393.2	1453	14401
1454	8253.19	1454	8224.62	1454	6772.88	1454	3638.79	1454	13844.3	1454	9659.25	1454	10794.8	1454	13515.4
1455	7422.76	1455	7194.51	1455	6491.68	1455	2617.94	1455	14134.1	1455	9291.6	1455	12597.2	1455	16111.6
1456	7815.17	1456	7501.23	1456	7413.76	1456	2094.07	1456	13452.3	1456	8366.96	1456	12907.9	1456	16525.5
1457	8380.45	1457	7706.57	1457	7309.43	1457	1920.27	1457	12520	1457	7911.79	1457	11900.1	1457	14574.4
1458	8035.44	1458	5885.13	1458	7134.55	1458	1914.75	1458	13658.7	1458	8526.17	1458	12709.7	1458	16132.4
1459	8795.01	1459	6528.35	1459	8373.62	1459	2923.2	1459	12047.8	1459	8320.55	1459	12167.3	1459	12913.8
1460	8762.71	1460	5686.03	1460	7948.87	1460	3949.98	1460	13061.4	1460	8651.17	1460	12856.1	1460	13457.8
1461	7566.06	1461	5134.12	1461	8455.55	1461	4034.95	1461	11465.6	1461	7007.33	1461	12422.9	1461	12349.7
1462	9109.57	1462	5936.28	1462	8734.46	1462	4165.11	1462	12776.6	1462	7612.89	1462	13304.2	1462	10669.1
1463	7712.3	1463	4631.02	1463	9540.86	1463	5190.1	1463	11553.9	1463	5762.3	1463	13712.6	1463	11632
1464	6993.81	1464	5274.18	1464	9002.56	1464	4888.78	1464	11716.1	1464	6990.5	1464	12762.1	1464	11734.2
1465	7418.55	1465	5096.39	1465	8639.33	1465	5385.13	1465	8235.61	1465	5682.33	1465	11667.8	1465	11983.8
1466	8660.89	1466	6505.18	1466	7973.34	1466	5113.01	1466	8329.52	1466	5815.78	1466	12882.6	1466	12242.8
1467	7672.96	1467	5578.77	1467	6701.44	1467	3492.25	1467	8477.24	1467	5997.61	1467	12783.4	1467	11064.4
1468	7072.25	1468	5898.16	1468	6672.58	1468	3647.39	1468	6617.01	1468	4653.46	1468	11890.3	1468	10309.7
1469	8630.67	1469	7113.83	1469	7766.91	1469	3294.16	1469	7115.03	1469	5790.88	1469	10232.4	1469	8637.97
1470	11756.9	1470	9827.17	1470	7857.41	1470	3458.7	1470	8335.37	1470	6466.52	1470	10437.6	1470	7651.47
1471	11561.7	1471	9644	1471	6966.76	1471	3932.19	1471	11032.6	1471	9024.37	1471	9011.52	1471	6245.78
1472	11722.1	1472	10198.7	1472	6250.31	1472	4062.35	1472	11027	1472	8332.36	1472	7546	1472	4012.15
1473	14981.6	1473	11998.7	1473	6489.4	1473	4333.49	1473	11218	1473	8739.77	1473	7963.51	1473	4704.87
1474	14073.7	1474	11539.8	1474	8023.72	1474	5098.92	1474	10067.6	1474	7697.8	1474	7061.92	1474	4250.52
1475	16002.1	1475	12468.1	1475	9579.86	1475	6357.6	1475	6655.69	1475	5161.9	1475	7233.83	1475	4206.64
1476	17188	1476	13494.8	1476	10148.9	1476	7127.08	1476	6206.5	1476	3589.8	1476	8254.31	1476	5006.85
1477	16484.4	1477	12708.2	1477	9763.18	1477	7555.47	1477	8043.28	1477	3903.31	1477	7013.49	1477	4132.97
1478	16221.9	1478	11984.8	1478	9598.98	1478	7154.13	1478	9990.39	1478	5691.28	1478	6272.95	1478	3950.67
1479	14133.5	1479	9939.18	1479	9234.31	1479	5920.74	1479	10862.1	1479	7801.44	1479	7197.25	1479	3928.79
1480	12061.9	1480	8583.78	1480	8158.89	1480	4081.57	1480	10781.6	1480	9118.56	1480	7560.61	1480	6027.23
1481	10645	1481	7071.35	1481	9298.99	1481	4331.42	1481	9557.8	1481	8019.07	1481	8354.09	1481	7145.22
1482	9663.67	1482	6394.47	1482	11088.7	1482	5395.01	1482	8657.11	1482	7437.88	1482	10092.9	1482	7634.43
1483	10028.2	1483	8091.79	1483	11626.4	1483	6281.38	1483	7831.66	1483	6046.1	1483	9351.02	1483	6465.9
1484	8746.88	1484	7479.22	1484	10821.1	1484	6860.28	1484	7204.34	1484	5768.26	1484	8527.47	1484	5190.9
1485	7953.31	1485	7131.72	1485	9325.19	1485	6255.85	1485	5661.22	1485	4074.21	1485	7165.92	1485	4389.59
1486	6712.56	1486	6071.82	1486	8680.6	1486	5500.31	1486	4529.06	1486	4089.78	1486	6211.96	1486	4306.33
1487	6227.14	1487	5963.47	1487	8440.88	1487	5358.54	1487	4677.39	1487	3578.59	1487	6692.97	1487	3814.02
1488	6016.14	1488	4833.41	1488	8805.19	1488	5622.2	1488	4602.73	1488	4005.27	1488	8302.19	1488	5181.01
1489	6968.26	1489	5890.28	1489	10501.5	1489	6239.52	1489	6503.95	1489	4666.77	1489	10317	1489	7396.64
1490	8178.02	1490	7091.35	1490	12859.3	1490	7570.85	1490	8201.46	1490	5393.1	1490	8973.04	1490	8163.4
1491	9474.44	1491	7900.38	1491	13482.4	1491	7518.81	1491	9404.72	1491	5848.15	1491	7881.25	1491	7377.46
1492	10181.4	1492	7234.25	1492	9066.18	1492	4670.96	1492	8972.43	1492	6401.02	1492	4392.9	1492	4347.99
1493	7663.14	1493	4442.68	1493	8044.96	1493	4594.21	1493	10027.2	1493	6598.35	1493	5942.5	1493	7758.94
1494	8659.67	1494	5878.18	1494	9519.76	1494	6925.47	1494	8541.25	1494	6391.31	1494	4713.55	1494	3641.31
1495	9387.12	1495	6019.5	1495	7687.29	1495	6252.42	1495	8721.97	1495	5683.96	1495	4178.85	1495	2884.24
1496	9582.22	1496	6561.36	1496	8232.6	1496	5683	1496	7957.57	1496	5495	1496	5186.95	1496	4095.54
1497	10256	1497	8192.12	1497	7365.25	1497	5363.03	1497	7733.63	1497	4936.15	1497	5000.74	1497	3233.08
1498	11511.6	1498	9127.97	1498	9111.76	1498	6092.23	1498	8047.85	1498	5576.67	1498	5506.89	1498	3895.94
1499	11882.8	1499	10958.4	1499	9567.04	1499	6106.55	1499	8853.75	1499	5986.64	1499	6173	1499	5852.35
1500	11572.5	1500	12421	1500	11320.1	1500	6070.76	1500	9359.06	1500	6405.61	1500	7106.4	1500	6153
1501	11234.7	1501	11054.4	1501	12360.7	1501	8098.68	1501	11180.6	1501	7584.4	1501	7665.44	1501	7598.97
1502	10997.4	1502	9280.47	1502	13758.3	1502	9809.53	1502	9924.86	1502	6605.05	1502	8424.42	1502	7512.85
1503	9742.02	1503	9068.43	1503	13697.6	1503	9002.5	1503	9359.93	1503	5880.44	1503	8684.09	1503	7224.3
1504	9103.95	1504	6565.59	1504	16199.2	1504	10949.1	1504	8469.49	1504	5973.25	1504	7295.2	1504	5870.61
1505	10135	1505	8650.86	1505	17621	1505	11845.9	1505	8974.17	1505	5975.11	1505	7698.03	1505	7376.75
1506	10042	1506	8482.39	1506	17771.6	1506	13951	1506	9765	1506	5944.64	1506	8051.93	1506	7778.08
1507	10114.5	1507	9192.47	1507	18484.6	1507	15641.9	1507	10169.8	1507	5692.26	1507	9074.15	1507	9292.34
1508	10774.4	1508	9924.66	1508	16380.7	1508	12035.9	1508	9869.54	1508	5467.4	1508	8776.12	1508	9208.61
1509	8572.84	1509	6969.27	1509	16972.8	1509	12338.4	1509	8225.15	1509	3778.94	1509	10230.2	1509	10216.4
1510	9127.67	1510	6701.91	1510	17511.6	1510	13405.8	1510	7372.56	1510	3351.64	1510	11063.7	1510	9564.57
1511	9328.84	1511	7369.58	1511	15915.2	1511	13198	1511	5390.39	1511	2127.7	1511	12758.1	1511	10342.5
1512	11110.1	1512	6646.31	1512	16902.5	1512	13962	1512	5991.07	1512	3385.93	1512	14176.1	1512	10868.5
1513	16752.5	1513	9487.92	1513	16743.5	1513	11858	1513	4949.58	1513	2663.32	1513	14351.3	1513	10335.3
1514	15318.3	1514	9657	1514	17426	1514	11014.8	1514	7290.22	1514	5151.8	1514	14275	1514	11215.7
1515	19632.7	1515	14597.8	1515	18354.4	1515	11273.9	1515	11244.8	1515	8674.32	1515	13847.7	1515	11814.7
1516	18638.7	1516	14027.9	1516	18273.9	1516	10543.9	1516	10869.2	1516	7314.66	1516	13643	1516	13876.4
1517	16455.9	1517	13413.1	1517	17433.6	1517	10007.3	1517	9649.59	1517	5887.4	1517	12770.9	1517	11170.6
1518	16022.1	1518	13166.7	1518	14624.4	1518	7868.13	1518	9253.24	1518	6528.88	1518	12517.1	1518	9275.33
1519	12634.6	1519	11474.7	1519	16152.3	1519	9958.13	1519	10552.3	1519	7209.57	1519	11861.2	1519	10035.4
1520	11154.5	1520	11096.2	1520	16732.2	1520	11123.3	1520	10416.8	1520	6116.08	1520	10794.4	1520	10310.2
1521	11226.8	1521	10483.6	1521	16745.2	1521	10953	1521	8934.05	1521	5563.77	1521	9722.27	1521	8338.48
1522	10915.9	1522	9397.05	1522	16038.1	1522	9825.96	1522	8629.29	1522	5333.91	1522	10207.4	1522	9777.15
1523	9618.6	1523	8534.56	1523	17016.6	1523	9574.31	1523	5762.08	1523	3411.55	1523	11860.3	1523	11644.7
1524	7894.25	1524	7226.87	1524	18261.2	1524	10049.3	1524	4180.69	1524	2797.92	1524	11458.9	1524	12371.9
1525	9079.77	1525	6988.41	1525	17203.6	1525	10391.5	1525	3381.46	1525	3241.12	1525	10702.6	1525	13260.4
1526	7151.33	1526	4182.52	1526	15745.2	1526	8823.74	1526	1843.05	1526	1790.53	1526	10451.9	1526	11888.8
1527	9080.87	1527	6477.96	1527	15466.4	1527	9656.26	1527	3196.73	1527	3326.7	1527	9031.72	1527	7872.58
1528	9450.32	1528	7910.99	1528	13608.3	1528	9051.58	1528	2704.3	1528	2270.05	1528	7424.75	1528	6667.37
1529	8381.7	1529	5482.8	1529	12337.1	1529	8278.15	1529	3462.41	1529	2571.87	1529	7540.48	1529	5923.04
1530	8844.77	1530	5427.19	1530	10862.1	1530	7249.08	1530	6275.1	1530	5052.55	1530	8847.93	1530	7380.62
1531	8869.21	1531	5846.49	1531	10470.1	1531	6958.62	1531	5152.1	1531	4180.01	1531	9918.01	1531	8208.33
1532	8312.73	1532	5929.69	1532	9789.51	1532	5861.37	1532	7885.32	1532	6174.01	1532	10669.8	1532	9248
1533	8801.93	1533	5947.61	1533	10589.6	1533	7280.64	1533	9250.47	1533	6753.37	1533	10288.9	1533	9878.7
1534	9205.51	1534	5190.48	1534	10145.6	1534	6574.49	1534	8881.46	1534	6614.02	1534	10643.6	1534	9133.54
1535	7322.08	1535	5535.13	1535	10344.7	1535	7161.46	1535	8708.84	1535	6026.4	1535	10689.4	1535	10752.4
1536	5305.75	1536	3995.7	1536	9351.08	1536	7062.18	1536	7023.05	1536	4601.33	1536	11534.8	1536	13332.6
1537	5016.72	1537	4917.29	1537	11106.4	1537	8118.61	1537	4768.14	1537	3203.47	1537	11542.8	1537	14573.8
1538	3785.11	1538	2765.96	1538	11356.3	1538	7497.03	1538	2899.35	1538	1719.01	1538	10880.4	1538	12523
1539	2141.62	1539	1423.19	1539	11868.4	1539	7204.77	1539	3979.66	1539	2667.56	1539	9507.42	1539	11929.8
1540	1746.29	1540	1760.69	1540	13528.6	1540	12025.7	1540	2579.09	1540	1924.83	1540	10360.7	1540	12863.9
1541	1138.26	1541	1211.35	1541	12921.3	1541	9389.24	1541	3957	1541	3065.76	1541	11102.1	1541	10220.3
1542	2507.59	1542	3750.21	1542	13517.8	1542	8770.47	1542	3636.49	1542	2921.89	1542	12544.3	1542	11283.7
1543	1549.46	1543	1803.19	1543	14930.1	1543	9438.42	1543	3254.77	1543	2234.24	1543	14156.5	1543	12177.2
1544	1387.26	1544	891.476	1544	15987.8	1544	10744.5	1544	2620.41	1544	1679.27	1544	15474.8	1544	13623.4
1545	1864.61	1545	1550.44	1545	16159.8	1545	10848.7	1545	4908.72	1545	3561.45	1545	14102.2	1545	13763.5
1546	2372.71	1546	2076.89	1546	17040.6	1546	11245.7	1546	7221.5	1546	5314.07	1546	13066.2	1546	13935.1
1547	1855.36	1547	2096.37	1547	16694	1547	11107.3	1547	8316.77	1547	5628.74	1547	12620.9	1547	13775.8
1548	2412.66	1548	1764.18	1548	16963.6	1548	11920.7	1548	7140.04	1548	4498.42	1548	13303.5	1548	14465
1549	2791.12	1549	1101.09	1549	17778.3	1549	11470.1	1549	6900.74	1549	2856.16	1549	12355.5	1549	14955.8
1550	3946.84	1550	606.973	1550	17157.3	1550	10748.1	1550	6556.11	1550	2997.25	1550	12609.6	1550	15969.3
1551	3406.24	1551	602.019	1551	17894.5	1551	11076.2	1551	6620.02	1551	3463.64	1551	12589.1	1551	16940.2
1552	3633.72	1552	577.422	1552	17637.4	1552	10900	1552	7346.17	1552	4813.58	1552	12512.9	1552	15607.6
1553	3093.58	1553	324.958	1553	17474.4	1553	11414.3	1553	8092.73	1553	5706.38	1553	14212.9	1553	15689.6
1554	4752.25	1554	1013.02	1554	16823.4	1554	10045.4	1554	10217	1554	7986.19	1554	13982.7	1554	13029.3
1555	4599.99	1555	1094.87	1555	16050.2	1555	9043.03	1555	12075.2	1555	9929.55	1555	11127.4	1555	10949.8
1556	4659.6	1556	2293.43	1556	15082.9	1556	9075.49	1556	14603.9	1556	13230.8	1556	10452.3	1556	9677.11
1557	4988.2	1557	2553.55	1557	13625	1557	9732.61	1557	15931.9	1557	14299.4	1557	10866	1557	10244.4
1558	6379.47	1558	2917.17	1558	12953.1	1558	8914.04	1558	16594.1	1558	15324.2	1558	10811.8	1558	10530.9
1559	7482.63	1559	4064.12	1559	13491.7	1559	8657.97	1559	19203.6	1559	18542.6	1559	10293.3	1559	9467.22
1560	6729.58	1560	3575.2	1560	14159.3	1560	9164.26	1560	16482.1	1560	17647.4	1560	9548.55	1560	9127.2
1561	5475.94	1561	4043.97	1561	14095.1	1561	9891.7	1561	12169.5	1561	12690.2	1561	8842.87	1561	8413.51
1562	5087.73	1562	4790.17	1562	13273.8	1562	10105.1	1562	15612.8	1562	17047.8	1562	8114.26	1562	7792.43
1563	5065.12	1563	5495.14	1563	13791.7	1563	8807.36	1563	17299.8	1563	17733.7	1563	8397.04	1563	8068.64
1564	5045.77	1564	5676.62	1564	13370.4	1564	8459.58	1564	15734	1564	15337.6	1564	7642.47	1564	7887.61
1565	6512.57	1565	6307.89	1565	12650	1565	8923.85	1565	13694.6	1565	12587.4	1565	8259.64	1565	7593.84
1566	8675.91	1566	10600.1	1566	12778.7	1566	8027.01	1566	16640.6	1566	16001.7	1566	9581.38	1566	9540.62
1567	9533.43	1567	10679.2	1567	12041.3	1567	6308.06	1567	18379	1567	14959.2	1567	9830.15	1567	11807.8
1568	8738.42	1568	7793.65	1568	12567.1	1568	8397.95	1568	16185.3	1568	15657.9	1568	10691.9	1568	13045.6
1569	7602.97	1569	6806.66	1569	10716.1	1569	7611.82	1569	16938.8	1569	15891	1569	11665.1	1569	13952
1570	7578.64	1570	6473.73	1570	13027.9	1570	9086.23	1570	15251.7	1570	14951.4	1570	12116.2	1570	13568.3
1571	7241.84	1571	6093.61	1571	11432.6	1571	8285.69	1571	17184	1571	16911.4	1571	13889.3	1571	16263.9
1572	6350.75	1572	5498.5	1572	12214.6	1572	9591.39	1572	15852.9	1572	16276.6	1572	13576.3	1572	15857.5
1573	6805.22	1573	6747.06	1573	11341	1573	8237.75	1573	16321.7	1573	17002.9	1573	13454.7	1573	14216.3
1574	6257.32	1574	6402.98	1574	12227.6	1574	7631.15	1574	16755	1574	16757.5	1574	13373.9	1574	12122.8
1575	5804.55	1575	7194.13	1575	13074.5	1575	8741.38	1575	14758.1	1575	16942.6	1575	12785.6	1575	11354.3
1576	6170.4	1576	6961.15	1576	14416.6	1576	10055.5	1576	16115.9	1576	16830.9	1576	12903.6	1576	12583.2
1577	5844.07	1577	6687.46	1577	16315.8	1577	10020.2	1577	15323.5	1577	15367.7	1577	12388.5	1577	14143.4
1578	5344.96	1578	5648.9	1578	16414.7	1578	9385.83	1578	14413.6	1578	13794.3	1578	11883.4	1578	11911.1
1579	4751.7	1579	5950.02	1579	13741	1579	8598.21	1579	13670.5	1579	12644.2	1579	13872.6	1579	14985.5
1580	4422.72	1580	5961.91	1580	13346.8	1580	9367.32	1580	13130.3	1580	12443.4	1580	11341.6	1580	11092.6
1581	4755.27	1581	7211.02	1581	12815.3	1581	7814.94	1581	10814.2	1581	10990.8	1581	12351.4	1581	13730.8
1582	4238.83	1582	5919.3	1582	11918.3	1582	6579.48	1582	11022.9	1582	10611.8	1582	9139.44	1582	8764.26
1583	4045.79	1583	5984.26	1583	11800.7	1583	6622.46	1583	9833.79	1583	9925.4	1583	6855.89	1583	6598.71
1584	3532.03	1584	5504.6	1584	11735.7	1584	6579.38	1584	10020.6	1584	9625.56	1584	6712	1584	6286.38
1585	2706.52	1585	4865.64	1585	12342.1	1585	6328.62	1585	8092.35	1585	8426.25	1585	6975.08	1585	5497.67
1586	2793.89	1586	3600.79	1586	13437.7	1586	5587.99	1586	9781.25	1586	10151.9	1586	7151.4	1586	5443.46
1587	3341.82	1587	3657.76	1587	14655.5	1587	6836.66	1587	6891.9	1587	8143.47	1587	8620.33	1587	7434.04
1588	4264.97	1588	2567.39	1588	14972.9	1588	8075.23	1588	5024.12	1588	6113.54	1588	8427.81	1588	6883.39
1589	5368.47	1589	2393.16	1589	15639.5	1589	7960.91	1589	5748.69	1589	6339.86	1589	9625.24	1589	8595.47
1590	8019.21	1590	3349.49	1590	17727.2	1590	8657.17	1590	6137.1	1590	6319.48	1590	8681.06	1590	8078.2
1591	8397.79	1591	3803.26	1591	17354.9	1591	9111.71	1591	5726.24	1591	4515.73	1591	7610.83	1591	6603.53
1592	9144.61	1592	5089.59	1592	16209.9	1592	7065.32	1592	5993.69	1592	3778.57	1592	6809.93	1592	5780.68
1593	8420.35	1593	5176.6	1593	16705.6	1593	7945.69	1593	8439.45	1593	5599.79	1593	5968.49	1593	6098.49
1594	9088	1594	5800.81	1594	15367.8	1594	7716.54	1594	10109.2	1594	8405.34	1594	6093.3	1594	6664.11
1595	10028.4	1595	6167.93	1595	14508.1	1595	8292.85	1595	10700.8	1595	10099.9	1595	6677.75	1595	7041.48
1596	7892.12	1596	5033.18	1596	11307.2	1596	7455.07	1596	10470.8	1596	10778	1596	7492.64	1596	6664.9
1597	8666.22	1597	4726.74	1597	11001.5	1597	4343.77	1597	12586.9	1597	12760.9	1597	8266.09	1597	7269.04
1598	7792.63	1598	3366.36	1598	10530.2	1598	6063.57	1598	14968.3	1598	14867.4	1598	8114.21	1598	8052.19
1599	8990.09	1599	4457.94	1599	10760.2	1599	6278.01	1599	14669.8	1599	14145.8	1599	8013.45	1599	8167.27
1600	12220.2	1600	6838.54	1600	10576.7	1600	7017.69	1600	17062.5	1600	14757	1600	7588.3	1600	7352.22
1601	14111.4	1601	10484.3	1601	10073.4	1601	4424.96	1601	18247.2	1601	13981.5	1601	7920.2	1601	6858.18
1602	12918.9	1602	11012.1	1602	10231	1602	6547.31	1602	22081.2	1602	13865.6	1602	6979.27	1602	6202.15
1603	14495	1603	14287.5	1603	12327.3	1603	7637.62	1603	21882.4	1603	14589.8	1603	7295.42	1603	6952.21
1604	13441.7	1604	10214.8	1604	13385	1604	6170.49	1604	22425.5	1604	15054.4	1604	7412.09	1604	7555.82
1605	11911.7	1605	8754.55	1605	14154.9	1605	5881.56	1605	23280.2	1605	15966.3	1605	7212.47	1605	7177.53
1606	12496.2	1606	8582.13	1606	14484.2	1606	6368.36	1606	22556.2	1606	14070.3	1606	7876.19	1606	7761.73
1607	12023.6	1607	7807.6	1607	12614	1607	6409.44	1607	23206.8	1607	16381.6	1607	6860.32	1607	6819.23
1608	12752.4	1608	8500.93	1608	9478.93	1608	5608.28	1608	23663.2	1608	18007	1608	7555.78	1608	8421.89
1609	11815.3	1609	9149.96	1609	6956.1	1609	4789.16	1609	23227.2	1609	18065.7	1609	8218.78	1609	9112.53
1610	12294.1	1610	10054.1	1610	5970.85	1610	4547.54	1610	19820.2	1610	12994.5	1610	8282.26	1610	8857.47
1611	11590.1	1611	9611.12	1611	6123.17	1611	4207.17	1611	21935.8	1611	16601.7	1611	8137.85	1611	8224.65
1612	11916.5	1612	9479.56	1612	5413.4	1612	2616.01	1612	23777.2	1612	20381.4	1612	8071.13	1612	7768.94
1613	10605.4	1613	8497.34	1613	7012.19	1613	2822.57	1613	18552.9	1613	11416.6	1613	9144.77	1613	8785.99
1614	10545.8	1614	7906.19	1614	7512.4	1614	3550.35	1614	13102.2	1614	5626.44	1614	9892.44	1614	8633.18
1615	10725.6	1615	8222.24	1615	9634.11	1615	5680.69	1615	11773.6	1615	5351.29	1615	9982.9	1615	9089.04
1616	11096.6	1616	8144.31	1616	10114.5	1616	5290.09	1616	9239.97	1616	5161.43	1616	10524.9	1616	9665.55
1617	10343.7	1617	7137.35	1617	10761.6	1617	6587.94	1617	6552.6	1617	5110.54	1617	10436.2	1617	10232.2
1618	9150.67	1618	6020.34	1618	11293.6	1618	7737.33	1618	5298.04	1618	5208.57	1618	10177.9	1618	9483.13
1619	8857.03	1619	7950.16	1619	10687.4	1619	7171.31	1619	4413.02	1619	4736	1619	7628.59	1619	6223.85
1620	9978.93	1620	10639.3	1620	11448	1620	7186.67	1620	5861.29	1620	5525.86	1620	8787.66	1620	7637.23
1621	8997.91	1621	9441.4	1621	10230	1621	6369.32	1621	4975.62	1621	4886.06	1621	8954.35	1621	10709
1622	9787.07	1622	9479.98	1622	11453.8	1622	6219.39	1622	7576.3	1622	6839.57	1622	9331.05	1622	10146.6
1623	9509.28	1623	8269.74	1623	13071.9	1623	6095.27	1623	9625.41	1623	6861.6	1623	9615.28	1623	11510.5
1624	9899.84	1624	9222.74	1624	11407.8	1624	5899.11	1624	8917.09	1624	6787.06	1624	8832.63	1624	10684
1625	10424.8	1625	11032.4	1625	11056.5	1625	5539.8	1625	9805.51	1625	6406.14	1625	8565.12	1625	9765.61
1626	10670.3	1626	11325.7	1626	11734.9	1626	7329.34	1626	8593.5	1626	4369.81	1626	8120.53	1626	9703.74
1627	11409.8	1627	11992	1627	9140.67	1627	4654.53	1627	8941.03	1627	4946.04	1627	7368.68	1627	8184.43
1628	10680.2	1628	12240.1	1628	8283.7	1628	5829.53	1628	7518.98	1628	4253.58	1628	7369.52	1628	8090.64
1629	10623.9	1629	10409.6	1629	10158.6	1629	6507.5	1629	6571.52	1629	3901.54	1629	7939.02	1629	7317.74
1630	11283.9	1630	10326.7	1630	9508.12	1630	6895.79	1630	7109.7	1630	3876.23	1630	7856.75	1630	8320.63
1631	13197.9	1631	11202.5	1631	8934.59	1631	6634.15	1631	5638.97	1631	4030.42	1631	8582.83	1631	7624.82
1632	12626.7	1632	10207.4	1632	8937.54	1632	8439.16	1632	5321.06	1632	4228.94	1632	9002.62	1632	10355.3
1633	11944.8	1633	10486.2	1633	8584.44	1633	8723.32	1633	5244.06	1633	4592.85	1633	9384.22	1633	11398.5
1634	11918.3	1634	10398.9	1634	9110.76	1634	8486.83	1634	4503.44	1634	3395.99	1634	7884.99	1634	9944.91
1635	10970.9	1635	9142.58	1635	9155.1	1635	7986.65	1635	3108.77	1635	1883.48	1635	7936.67	1635	10654.8
1636	9506.51	1636	7052.03	1636	9195.08	1636	7897.69	1636	2542.13	1636	1129.21	1636	7193.35	1636	10654.7
1637	11172.3	1637	9186.32	1637	9160.87	1637	7008.35	1637	1889.25	1637	813.116	1637	6209.4	1637	10031.9
1638	10235.4	1638	9235.46	1638	8915.69	1638	7388.53	1638	1937.9	1638	1010.48	1638	6406.8	1638	9795.36
1639	9271.65	1639	6385.9	1639	9432.77	1639	6493.72	1639	1236.69	1639	816.283	1639	6854.95	1639	9517.43
1640	8983.78	1640	4758.85	1640	9878.57	1640	6546.26	1640	2411.32	1640	1857.19	1640	7702.53	1640	9604.57
1641	9231.72	1641	4415.17	1641	11477.1	1641	6481.68	1641	2877.35	1641	2197.72	1641	7904.69	1641	8072.26
1642	9526.8	1642	4490.16	1642	13372.4	1642	7658.23	1642	4161.9	1642	3583.98	1642	8411.01	1642	9684.09
1643	8901.14	1643	4417.59	1643	14506.4	1643	8966.79	1643	5998.84	1643	5696.73	1643	8786.4	1643	9394.08
1644	9989.09	1644	5729.23	1644	16163.3	1644	9088.06	1644	6962.2	1644	5838.71	1644	8627.29	1644	8011.13
1645	9368.42	1645	6393.9	1645	16058.4	1645	9808.67	1645	6598.26	1645	4425.73	1645	9068.93	1645	9541.75
1646	7759.23	1646	5653.61	1646	18745.2	1646	13525.3	1646	7276.68	1646	5569.52	1646	9623.1	1646	11156.1
1647	6552.51	1647	4977.2	1647	16977.4	1647	12256.3	1647	5154.96	1647	3299.72	1647	10877.1	1647	13648.1
1648	5723.89	1648	4511.13	1648	15675.8	1648	10606.3	1648	4168.54	1648	3688.25	1648	12990.8	1648	18472.4
1649	6147.44	1649	4025.66	1649	16585.3	1649	11476.6	1649	4105.61	1649	2975.36	1649	13863.2	1649	17735.5
1650	6427.83	1650	4214.6	1650	15189	1650	11381.8	1650	3226.2	1650	2538.18	1650	12588.4	1650	17682.8
1651	6454.01	1651	4226.1	1651	14304.5	1651	9806.15	1651	4473.97	1651	3205.52	1651	14381.4	1651	17117.6
1652	7591.4	1652	4758.43	1652	16053.6	1652	12363.9	1652	4168.34	1652	2744.86	1652	12931.9	1652	15086.1
1653	6488.05	1653	4320.25	1653	12655.3	1653	7872.01	1653	4726.64	1653	2697.76	1653	10347.9	1653	12205.8
1654	8047.38	1654	5810.68	1654	13382.4	1654	9828.65	1654	3853.2	1654	2292.5	1654	10621	1654	12722.4
1655	8042	1655	5011.09	1655	12673.4	1655	9569.92	1655	4206.91	1655	3084.67	1655	10614.6	1655	11223.8
1656	9956.93	1656	6132.49	1656	11590.6	1656	8564.73	1656	3130.4	1656	2822.71	1656	11430.1	1656	12655.5
1657	9315.09	1657	6895.33	1657	10582.3	1657	8103.69	1657	3168.84	1657	2696.02	1657	11701.3	1657	13774
1658	8670.89	1658	6624.12	1658	10252	1658	6357.79	1658	3287.99	1658	1562.08	1658	9637.57	1658	13444.1
1659	7785.32	1659	5389.58	1659	11562.9	1659	5977.06	1659	3372.68	1659	1291.72	1659	11183.5	1659	14133.4
1660	8520.25	1660	6008.48	1660	10466	1660	5664.72	1660	3285.87	1660	1726.43	1660	10762	1660	12714.6
1661	9643.55	1661	5428.28	1661	11262.3	1661	6238.21	1661	5538.64	1661	2274.59	1661	11822.8	1661	13474.3
1662	9817.75	1662	5475.25	1662	8183.65	1662	5039.27	1662	5143.44	1662	2296.98	1662	10991	1662	11829.7
1663	8520.98	1663	5455.71	1663	7204.98	1663	5183.17	1663	5270.07	1663	2644.14	1663	10788.2	1663	11667.2
1664	8817.47	1664	6749.9	1664	6553.9	1664	3493.78	1664	7649.87	1664	3511.73	1664	11929.5	1664	12891.8
1665	8906.64	1665	7327.46	1665	8185.55	1665	4291.19	1665	10045.4	1665	5020.1	1665	12625	1665	14236.7
1666	9063.23	1666	7045.81	1666	8095.55	1666	3952.39	1666	11043.7	1666	5488.02	1666	12706.4	1666	14367.4
1667	9399.94	1667	9208.55	1667	9235.34	1667	5055.94	1667	9528.06	1667	4635.86	1667	12199.9	1667	15269.2
1668	9368.44	1668	9323.87	1668	9796.92	1668	5328.33	1668	8856.77	1668	4746.04	1668	11201.7	1668	14567.1
1669	9865.73	1669	9640.46	1669	10030.5	1669	5032.15	1669	10509.7	1669	5917.6	1669	10106.6	1669	12770.6
1670	9933.97	1670	7578.55	1670	10175.1	1670	6729.3	1670	9198.64	1670	5405.06	1670	10000	1670	12799.6
1671	10490.8	1671	9528	1671	10918.8	1671	6622.91	1671	8796.76	1671	4815.44	1671	11401	1671	13382.2
1672	10766.5	1672	7122.79	1672	9893.23	1672	5109	1672	8381.23	1672	4733.61	1672	8192.1	1672	9335.53
1673	10374.8	1673	7324.39	1673	10062.4	1673	6065.46	1673	9453.72	1673	6115.17	1673	8921.6	1673	10190.4
1674	9823.76	1674	8402.55	1674	9776.26	1674	6124.05	1674	9933.3	1674	6729.03	1674	9086.54	1674	8899.46
1675	8340.1	1675	7427.33	1675	9432.61	1675	5486.8	1675	9487.01	1675	6240.2	1675	9568.96	1675	9591.1
1676	6857.08	1676	5320.13	1676	8726.49	1676	5494.41	1676	10109.1	1676	6654.87	1676	8391.33	1676	8143.9
1677	6400.46	1677	4327.4	1677	8303.14	1677	5124.43	1677	8754.35	1677	5758.23	1677	8376.37	1677	6945.09
1678	6778.25	1678	5678.01	1678	7462.48	1678	4976.12	1678	6109.13	1678	4372.95	1678	9737.07	1678	6858.07
1679	8279.33	1679	6557.13	1679	8366.9	1679	5478.22	1679	7142.16	1679	5637.66	1679	10179.4	1679	8101.52
1680	9706.88	1680	7418.14	1680	10147.9	1680	4364.02	1680	7832.81	1680	5465.16	1680	8593.73	1680	6748.57
1681	10647.1	1681	8434.19	1681	12630.9	1681	5550.09	1681	9461.58	1681	6447.13	1681	7730.93	1681	6653.2
1682	10506.7	1682	7642.98	1682	11404.8	1682	5199.61	1682	8660.49	1682	6149.32	1682	7593.47	1682	6185.63
1683	10348	1683	6535.4	1683	13465.1	1683	7982.48	1683	8050.8	1683	6255.98	1683	8610.34	1683	6226.51
1684	10890.8	1684	5558.13	1684	14588.6	1684	10189.1	1684	7856.05	1684	6486.26	1684	8624.54	1684	7106.03
1685	10867.5	1685	5927.14	1685	13903.1	1685	7179.56	1685	8199.54	1685	6701.41	1685	8044.87	1685	6901.67
1686	11344.5	1686	6591.76	1686	12189.2	1686	7190.37	1686	8540.53	1686	6982.15	1686	7589.76	1686	6424.93
1687	10218.4	1687	6355.91	1687	10440.7	1687	6140.43	1687	7079.17	1687	6664.79	1687	7772.02	1687	6106.53
1688	8667.06	1688	5098.23	1688	9973.45	1688	4665.52	1688	5568.29	1688	6382.51	1688	7455.54	1688	6257.14
1689	8265.42	1689	4025.39	1689	10585.4	1689	3723.71	1689	8238.5	1689	7622.19	1689	8856.77	1689	8571.98
1690	7700.67	1690	4165.62	1690	10751.7	1690	3941.93	1690	7361.39	1690	7151.07	1690	8637.01	1690	8991.92
1691	5773.27	1691	2187.07	1691	7738.97	1691	3354.17	1691	7927.05	1691	7722.19	1691	9853.71	1691	11117.2
1692	5684.47	1692	2295.41	1692	5198.82	1692	3062.63	1692	5899.68	1692	6163.37	1692	9185.71	1692	9377.35
1693	5597.28	1693	1936.43	1693	7065.04	1693	3625.4	1693	6991.93	1693	7415.48	1693	8422.16	1693	9003.68
1694	6860.07	1694	2488.89	1694	7027.74	1694	5106.77	1694	5011.68	1694	6148.11	1694	8412.36	1694	9468.19
1695	8577.16	1695	4936.61	1695	7187.23	1695	4626.78	1695	5488.43	1695	6230.88	1695	8652.99	1695	9948.08
1696	7742.23	1696	6912.5	1696	7313.8	1696	4351.77	1696	7333.29	1696	6936.18	1696	9471.92	1696	10500
1697	6968.08	1697	6320.97	1697	7864.05	1697	4861.15	1697	9478.97	1697	7409.34	1697	10417.6	1697	11353.4
1698	6178.44	1698	5715.23	1698	9796.67	1698	5355.75	1698	9610.3	1698	6822.45	1698	10960.1	1698	13982.9
1699	6165.92	1699	6467.48	1699	11616.7	1699	5958.32	1699	9036.68	1699	6138.5	1699	11011.2	1699	13689.1
1700	7356.31	1700	7710.21	1700	12085.1	1700	7154.12	1700	7724.23	1700	5416.13	1700	11354.5	1700	12642.3
1701	8303.5	1701	8744.1	1701	12430.9	1701	8001.81	1701	5595.79	1701	3941.35	1701	11102.3	1701	12978.7
1702	7750.21	1702	6704.37	1702	12782.7	1702	6472.72	1702	3847.51	1702	2822.83	1702	10793.1	1702	10867.4
1703	7207.34	1703	7768.96	1703	11782.9	1703	6277.15	1703	4363.16	1703	4796	1703	10122	1703	8415.85
1704	7010.86	1704	6900.19	1704	12372.1	1704	7404.9	1704	4274.85	1704	3425.98	1704	8364.73	1704	6293.49
1705	7655.17	1705	5979.47	1705	11935.2	1705	5846.36	1705	4750.37	1705	3663.58	1705	8132.43	1705	7958.92
1706	7126.72	1706	4177.5	1706	10814.7	1706	5821.03	1706	6107.64	1706	5714.7	1706	8841.91	1706	8931.31
1707	5323.3	1707	2346.9	1707	11074.6	1707	6683.03	1707	6800.16	1707	6619.55	1707	8147.74	1707	8942.33
1708	5246.36	1708	2696.7	1708	10781	1708	6757.14	1708	8297.37	1708	8944.54	1708	8079.35	1708	7875.03
1709	6039.88	1709	3407.06	1709	11357.8	1709	7635.68	1709	10278.4	1709	10650.3	1709	8319.83	1709	9259.9
1710	6077.57	1710	3476.45	1710	11962.3	1710	7236.33	1710	9873.7	1710	10919.1	1710	9468.6	1710	10623.9
1711	7129.44	1711	5627.87	1711	13133.2	1711	8825.41	1711	10042.5	1711	9162.08	1711	9412.69	1711	10719.5
1712	7765.51	1712	5530.89	1712	14882.4	1712	10367.5	1712	8853.1	1712	7618.1	1712	8298.26	1712	8297.37
1713	8447.93	1713	5738.15	1713	15265.6	1713	11570.7	1713	8648.78	1713	6499.7	1713	7524.86	1713	7777.77
1714	7420.78	1714	6031.38	1714	14627.3	1714	8109.31	1714	9163.56	1714	6603.36	1714	6186.7	1714	6294.7
1715	6642.86	1715	5478.85	1715	12935.1	1715	5696.49	1715	8917.29	1715	6341.2	1715	6096.48	1715	5781.94
1716	6269.23	1716	5773.12	1716	7857.81	1716	4169.15	1716	9513.68	1716	6827.47	1716	6344.81	1716	6905.33
1717	4836.83	1717	3876.98	1717	6015.36	1717	3260.43	1717	9752.66	1717	6605.22	1717	5166.12	1717	4904.31
1718	4837.53	1718	4313.03	1718	5477.29	1718	1740.06	1718	9885.49	1718	6700.6	1718	5327.23	1718	5586.91
1719	5115.27	1719	3828.12	1719	7070.28	1719	1527	1719	10970.9	1719	8566.06	1719	4241.17	1719	3269.83
1720	7157.44	1720	6244.21	1720	6795.06	1720	1952.79	1720	10997.4	1720	8303.68	1720	4480.67	1720	3787.3
1721	6895.78	1721	5229.17	1721	6929.79	1721	3440.17	1721	12335	1721	9281.47	1721	5862.79	1721	6645.48
1722	6855.4	1722	4971.78	1722	8277.15	1722	4634.31	1722	11146.4	1722	8683.83	1722	6371.34	1722	5837.19
1723	7943.87	1723	5822.22	1723	7521.19	1723	4710.83	1723	8999.53	1723	7127.21	1723	6764.62	1723	6537.51
1724	7904.65	1724	5173.51	1724	6205.7	1724	4069.16	1724	8521	1724	6857.25	1724	7084.7	1724	8382.3
1725	7841.3	1725	5912.3	1725	7234.35	1725	4761.88	1725	7932.69	1725	6292.92	1725	7504.03	1725	9042.07
1726	7898.12	1726	6706.47	1726	9699.38	1726	6698.02	1726	7390.76	1726	5844.07	1726	7778.47	1726	10164.9
1727	6809.05	1727	5276.59	1727	12988.9	1727	10953.3	1727	7366.6	1727	5316.28	1727	8115.62	1727	10210.1
1728	5878.8	1728	4975.58	1728	13711.8	1728	11482.4	1728	6763.47	1728	4741.41	1728	8144.46	1728	9044.88
1729	5442.14	1729	5403.8	1729	13975.9	1729	13038.7	1729	6343.58	1729	4513.62	1729	9096.86	1729	9512.22
1730	6107.39	1730	6270.13	1730	12297.5	1730	11736.9	1730	6777.32	1730	3769.38	1730	10555.5	1730	9858.75
1731	4141.18	1731	5175.6	1731	11113.1	1731	10466.8	1731	7104.78	1731	4202.44	1731	11844.7	1731	11373.1
1732	5378.72	1732	6407.15	1732	10935.2	1732	9493.96	1732	8985.78	1732	5016.8	1732	15513.4	1732	14736.6
1733	5786.69	1733	4640.28	1733	11042.8	1733	7468.69	1733	10571.4	1733	6411.84	1733	16594.1	1733	16051.3
1734	7234.09	1734	4337.02	1734	10796.9	1734	5425.88	1734	12889.8	1734	8073.02	1734	14869.6	1734	15968.8
1735	9063.2	1735	5435.07	1735	12102.6	1735	7945.14	1735	13257.1	1735	8976.76	1735	16346.5	1735	16613.2
1736	8066.11	1736	4385.66	1736	9266.03	1736	5517.71	1736	12696.8	1736	8971.18	1736	15706.8	1736	14788.8
1737	7596.9	1737	4524.61	1737	6799.71	1737	4741.29	1737	10262.6	1737	7502.36	1737	17780.3	1737	16677.7
1738	8352.47	1738	6555.07	1738	6133.21	1738	5638.43	1738	8977.36	1738	6040.58	1738	19665.3	1738	18242.9
1739	8106.56	1739	5822.58	1739	6202.83	1739	3762.31	1739	8203.55	1739	4695.97	1739	18950.7	1739	16895.7
1740	9947.93	1740	7810.95	1740	7082.95	1740	4769.4	1740	8720.54	1740	4654.07	1740	17371.9	1740	18700.1
1741	9137.54	1741	7413.96	1741	8496.06	1741	6699.88	1741	8782.87	1741	4882.31	1741	15386.6	1741	18843.1
1742	8506.11	1742	7465.97	1742	12539.6	1742	9357.24	1742	8963.03	1742	5558.93	1742	14601.8	1742	16737.5
1743	9215.55	1743	8628.5	1743	12237.7	1743	7266.04	1743	9135.66	1743	6378.1	1743	13947.4	1743	14221
1744	8592.35	1744	7779.58	1744	14916.5	1744	9746.74	1744	8078.73	1744	5971.3	1744	13756.9	1744	12963.5
1745	7992.32	1745	7109.64	1745	12373.1	1745	7140.98	1745	8257.86	1745	6134.93	1745	14333.1	1745	13360.1
1746	8450.6	1746	5985.46	1746	11165.3	1746	7116.94	1746	8014.95	1746	6097.65	1746	13343.1	1746	12511
1747	10441	1747	7116.49	1747	9566.2	1747	6770.33	1747	9073.41	1747	7573.52	1747	12669.9	1747	12992.9
1748	11262.7	1748	7690.27	1748	10745	1748	6609.02	1748	8990.45	1748	6821.11	1748	11776.6	1748	12918.9
1749	11927.9	1749	7971.13	1749	11063.2	1749	8751.74	1749	8293.19	1749	6065.38	1749	12045.5	1749	13061.6
1750	12350.4	1750	6464.24	1750	10989.9	1750	7835.61	1750	7252.95	1750	5762.12	1750	9302.85	1750	11163.4
1751	12080.1	1751	6564.5	1751	9329.43	1751	6727.12	1751	6995.9	1751	5778.4	1751	10905	1751	12005
1752	12162.9	1752	6969.4	1752	7765.09	1752	6583.82	1752	5818.82	1752	5144.17	1752	12088.4	1752	13584.3
1753	12443.7	1753	6081.41	1753	8555.99	1753	7486.47	1753	5227.94	1753	4820.92	1753	11182.6	1753	12872.1
1754	12740	1754	7528.23	1754	9380.2	1754	6977.18	1754	4108.33	1754	3976.25	1754	14125.6	1754	17346
1755	13590.6	1755	7726.15	1755	9715.96	1755	6793.3	1755	3921.8	1755	4241.35	1755	12895.9	1755	14778.6
1756	14317.8	1756	9157.3	1756	9158.9	1756	6579.4	1756	5282.04	1756	5185.28	1756	12756.6	1756	15901
1757	14914.7	1757	7949.06	1757	10894.4	1757	10785.7	1757	7347.85	1757	5782.71	1757	15254.3	1757	15931.1
1758	14718.9	1758	8283	1758	8721.32	1758	9015.96	1758	7701.45	1758	5537.77	1758	17466.8	1758	15627.5
1759	14835.1	1759	9361.29	1759	8933.13	1759	9319.44	1759	8291.33	1759	5815.62	1759	16886.6	1759	14720.9
1760	11401.4	1760	8497.22	1760	8602.37	1760	8260.49	1760	9640.31	1760	7366.31	1760	16393.6	1760	15317.1
1761	10919.8	1761	8570.8	1761	8762.89	1761	8394.44	1761	8985.35	1761	7484.23	1761	14907.9	1761	14928.6
1762	12145.3	1762	7585.69	1762	8549.5	1762	8198.2	1762	7254.95	1762	5631.78	1762	13757.1	1762	14181.1
1763	11851.6	1763	6264.79	1763	9282.95	1763	8038.49	1763	7227.13	1763	5379.22	1763	12514.9	1763	12850.9
1764	10296.7	1764	5640.92	1764	8433.76	1764	7131.95	1764	5430.84	1764	4332.48	1764	12596.9	1764	13113
1765	9645.47	1765	3514.8	1765	8981.1	1765	6467.96	1765	5007.15	1765	4200.19	1765	15093.1	1765	15263.8
1766	8572.74	1766	3252.28	1766	9568.1	1766	4501.75	1766	5105.24	1766	4395.96	1766	18476.2	1766	18397.2
1767	8122.43	1767	2932.98	1767	9773.29	1767	3827.97	1767	6579.94	1767	4204.82	1767	20950.9	1767	19214.5
1768	8642.38	1768	3974.88	1768	10613.4	1768	6133.61	1768	8315.14	1768	6276.56	1768	17784.3	1768	14145.6
1769	10114.5	1769	6321.52	1769	11356.8	1769	9239.94	1769	7214.79	1769	6586.56	1769	14926.4	1769	12593
1770	10679.7	1770	7432.89	1770	11979.6	1770	11132.4	1770	5942.86	1770	6343.69	1770	13081.2	1770	12816.6
1771	12109.7	1771	8402.73	1771	11461.4	1771	9474.49	1771	5069.78	1771	5746.97	1771	14167.7	1771	12943.2
1772	11915	1772	9509.81	1772	10897	1772	9600.95	1772	4477.08	1772	4625.27	1772	13940	1772	14669.9
1773	11405.9	1773	9925.54	1773	9804.34	1773	7819.87	1773	3915.01	1773	4451.31	1773	15082.3	1773	17658.4
1774	10321.7	1774	8658.48	1774	9029.56	1774	7478.83	1774	3935.93	1774	3415.43	1774	15343.6	1774	15954.8
1775	10272.9	1775	7607.27	1775	8284.85	1775	6478.57	1775	3531.56	1775	2565.92	1775	15984.7	1775	16551.3
1776	9661	1776	7841.27	1776	10551.7	1776	5996.46	1776	4875.27	1776	2606.78	1776	14712.2	1776	16874.3
1777	9326.61	1777	6442.62	1777	11315.3	1777	5849.56	1777	5764.42	1777	3258.92	1777	13346	1777	13198.2
1778	9344.02	1778	6719.14	1778	10719	1778	4580.13	1778	6783.13	1778	4183.88	1778	12303.6	1778	9921.46
1779	8964.97	1779	5758.17	1779	11486.2	1779	4872.9	1779	8168.2	1779	5226.16	1779	13430.9	1779	9751.51
1780	8274.42	1780	5484.07	1780	11593.7	1780	4617.61	1780	7230.58	1780	4649.02	1780	15241.9	1780	10286.6
1781	8665.15	1781	5604.37	1781	11102.5	1781	4187.38	1781	7454.42	1781	5728.69	1781	16929.4	1781	12412
1782	8405.61	1782	5739.91	1782	10053.3	1782	4102.89	1782	5376.71	1782	4160.46	1782	17346.5	1782	15086.2
1783	7061.4	1783	5500.51	1783	9292.67	1783	3856.1	1783	6050.88	1783	3808.87	1783	16261.3	1783	16294
1784	7301.58	1784	5379.36	1784	8621	1784	3547.8	1784	5574.66	1784	3607.55	1784	15250.6	1784	16438
1785	7762.55	1785	5811.3	1785	7821.12	1785	3419.61	1785	4019.63	1785	2804.76	1785	12761.8	1785	13323
1786	7082.65	1786	6805.59	1786	7431.64	1786	3400.07	1786	4352.98	1786	2780.26	1786	8919	1786	9631
1787	6739.22	1787	6063.83	1787	6687.62	1787	3515.62	1787	3788.62	1787	2893.99	1787	8510.85	1787	10097.3
1788	6547.89	1788	4855.3	1788	6318.92	1788	3987.67	1788	4777.3	1788	3373.3	1788	10299.2	1788	12757.3
1789	5788.51	1789	5023.53	1789	6624.87	1789	4380.53	1789	4565.23	1789	3536.65	1789	12102.3	1789	13298.2
1790	6607.4	1790	4682.01	1790	5565.28	1790	3294.99	1790	5113.04	1790	4183.36	1790	12798.3	1790	14250
1791	6855.23	1791	3705.88	1791	6210.22	1791	3490.4	1791	7360.5	1791	5816.03	1791	12667	1791	13272.4
1792	7054.84	1792	3642.2	1792	6338.16	1792	5323.88	1792	10056.1	1792	8438.64	1792	12499.4	1792	11855.3
1793	7794.67	1793	4003.8	1793	5996.77	1793	4220.77	1793	10326.8	1793	8380.17	1793	11766.2	1793	11273.4
1794	8600.8	1794	4069.43	1794	6742.62	1794	4260.85	1794	8878.58	1794	6744.54	1794	11534.5	1794	10245.7
1795	9437.6	1795	4533.21	1795	6971.86	1795	5075.72	1795	9582.47	1795	7823.86	1795	11919.5	1795	10220.8
1796	10118.5	1796	4442.67	1796	6182.48	1796	4647.86	1796	10013.6	1796	7633.79	1796	13282.3	1796	11660
1797	11473.6	1797	4873.52	1797	5150.27	1797	4752.77	1797	9315.48	1797	6308.86	1797	16422.1	1797	15443.2
1798	11773.9	1798	5871.57	1798	4569.97	1798	5465.92	1798	7793.27	1798	5597.55	1798	15172.6	1798	13696.5
1799	11426	1799	7736.06	1799	6845.76	1799	6130.81	1799	5482.97	1799	4054.15	1799	14569.4	1799	15048.2
1800	11604.5	1800	7132.82	1800	6592.45	1800	7169.2	1800	5628.53	1800	4077.62	1800	13999.5	1800	17099.5
1801	12076.3	1801	7194.33	1801	7103.91	1801	5293.44	1801	4093.54	1801	3313.41	1801	13253.2	1801	16886.1
1802	12306	1802	6915.85	1802	10333.3	1802	9727.83	1802	4391.6	1802	3600.84	1802	13126.8	1802	15484.4
1803	13120.9	1803	8029.97	1803	12748.9	1803	10964.7	1803	4005.61	1803	3328.78	1803	14002.8	1803	16714.2
1804	12815.7	1804	7643.38	1804	13578.9	1804	11021.7	1804	4944.18	1804	3639.48	1804	13227.3	1804	14718.8
1805	11326.3	1805	7602.12	1805	13841.2	1805	10470.1	1805	4004.22	1805	3252.36	1805	12565	1805	12113.8
1806	9775.82	1806	6237.24	1806	12745.6	1806	7760.87	1806	5284.09	1806	4142.67	1806	11509.2	1806	11782.1
1807	8424.38	1807	5527.68	1807	10470.6	1807	8438.7	1807	5113.19	1807	4038.91	1807	11829.8	1807	10890.6
1808	8052.1	1808	5103.24	1808	10114.7	1808	8918.95	1808	4034.4	1808	3289.68	1808	10448.3	1808	12135.7
1809	7665.3	1809	4326.08	1809	10937.4	1809	7962.12	1809	3372.78	1809	2763.81	1809	10542.5	1809	11991.9
1810	6971.69	1810	3548.86	1810	10973	1810	9336.65	1810	3683.69	1810	3458.36	1810	12768	1810	12543.8
1811	6168.19	1811	3267.16	1811	10742.5	1811	9623.35	1811	4735.7	1811	5175.71	1811	13061.9	1811	13141.9
1812	6070.14	1812	3396.24	1812	10966.7	1812	7727.46	1812	4642.16	1812	5316.99	1812	13549.6	1812	14473.8
1813	6291.96	1813	3026.95	1813	10791.8	1813	6697.82	1813	5989.67	1813	5475.96	1813	11892.1	1813	13017.8
1814	6586.99	1814	4260.28	1814	12164.6	1814	8001.64	1814	5158.44	1814	4560.55	1814	11612	1814	11589.3
1815	7994.71	1815	4281.26	1815	12173.2	1815	7889.28	1815	6884.77	1815	4693.03	1815	9682.1	1815	10116.9
1816	9282.57	1816	4855.03	1816	14159.7	1816	9616.33	1816	5939.85	1816	4309.18	1816	8739.09	1816	8670.26
1817	10786	1817	6404.48	1817	14834.9	1817	10980.3	1817	6060.61	1817	4503.81	1817	7879.92	1817	8239.45
1818	12522.8	1818	7099.32	1818	14508.1	1818	9674.05	1818	6193.62	1818	4182.6	1818	7036.57	1818	7205.48
1819	13648.5	1819	7627.62	1819	12771.9	1819	7223.01	1819	6742.58	1819	5223.76	1819	9067.85	1819	11449.8
1820	12114	1820	6678.57	1820	10668.4	1820	5618.63	1820	5747.87	1820	4722.89	1820	9174.74	1820	11451
1821	12658.2	1821	7477.05	1821	8641.1	1821	5087.37	1821	6918.85	1821	6963.4	1821	9280.43	1821	10955.4
1822	12753.2	1822	7177.37	1822	8178.31	1822	4846.97	1822	8059.46	1822	8023.21	1822	8868.81	1822	11304.9
1823	13549	1823	7961.31	1823	8283.78	1823	5113.66	1823	8175.74	1823	8173.41	1823	10074.5	1823	12728.2
1824	14466.7	1824	10373.9	1824	6692.46	1824	3725.47	1824	7858.66	1824	7626.65	1824	9129.51	1824	10634.3
1825	14145.8	1825	12912.1	1825	7465.17	1825	4410.17	1825	9459.22	1825	7677.61	1825	9062.75	1825	12468.9
1826	11759.5	1826	12549.1	1826	7157.02	1826	4899.59	1826	10198.6	1826	8621.36	1826	9019.56	1826	11885.4
1827	11599.1	1827	11302	1827	7947.87	1827	4600.54	1827	11372	1827	9507.7	1827	8873.83	1827	11081.8
1828	11354.8	1828	9629.27	1828	8937.29	1828	4364.6	1828	10721.6	1828	7055.65	1828	10804.8	1828	13447
1829	11163.7	1829	8483.08	1829	8155.45	1829	4246.51	1829	10924.2	1829	8492.28	1829	10886.1	1829	12623.1
1830	10543.8	1830	7079.68	1830	7879.96	1830	3716.63	1830	10873.3	1830	9166.13	1830	10622.6	1830	13716.7
1831	9733.54	1831	6111.95	1831	7240.86	1831	2291.93	1831	9859.9	1831	6907.79	1831	10710.1	1831	13727.5
1832	9263.49	1832	6165.16	1832	7936.58	1832	2615.92	1832	9144.61	1832	5360.8	1832	11027.4	1832	12844
1833	9612.49	1833	6758.36	1833	8351.03	1833	3564.76	1833	9836.42	1833	6787.68	1833	10730.8	1833	11462.9
1834	9261.8	1834	6555.16	1834	7304.92	1834	3452.59	1834	9682.3	1834	7234.89	1834	10608.6	1834	8850.28
1835	9371.07	1835	6458.71	1835	7113.29	1835	3740.28	1835	9541.08	1835	6842.47	1835	10001.8	1835	8708.36
1836	9098.14	1836	6828.69	1836	6754.13	1836	3747.45	1836	9514.7	1836	6766.52	1836	10432.8	1836	8082.69
1837	8732.37	1837	6432.02	1837	6209.77	1837	4041.92	1837	9033.4	1837	6571.08	1837	10287.1	1837	9111.78
1838	9350.62	1838	6602.39	1838	7588.33	1838	2993.18	1838	7966.46	1838	6283.51	1838	9466.65	1838	8241.14
1839	9099.62	1839	6959.7	1839	10221.6	1839	6500.59	1839	7650.43	1839	5681.33	1839	9393.1	1839	8169.44
1840	9436.67	1840	5980.3	1840	10448.2	1840	7070.24	1840	7598.53	1840	4945.99	1840	9407.8	1840	9013.77
1841	7853.08	1841	5427	1841	12112.5	1841	9977.07	1841	7350.33	1841	5196.09	1841	9819.42	1841	12973.5
1842	8638.41	1842	5704.23	1842	11300.8	1842	7849.71	1842	6779.23	1842	6427.22	1842	11761.4	1842	11228.9
1843	7806.83	1843	5160.4	1843	9778.61	1843	5574.08	1843	7702.29	1843	7066.07	1843	12015.7	1843	9322.49
1844	6972.28	1844	4315.44	1844	10111.6	1844	5589.59	1844	7292.6	1844	8581.65	1844	10847.9	1844	8058.07
1845	6896.69	1845	3220.88	1845	8904.38	1845	5166.65	1845	6725.06	1845	8239.4	1845	10559.9	1845	8869.34
1846	6593.97	1846	3153.84	1846	8330.52	1846	6080.3	1846	6057.87	1846	7798.9	1846	10380.2	1846	9804.66
1847	6677.1	1847	3894.18	1847	8414.68	1847	7114.85	1847	5581.47	1847	5897.41	1847	10831.7	1847	11132.8
1848	6374.63	1848	3887.19	1848	7493.62	1848	6123.37	1848	6197.77	1848	6420.6	1848	11513.6	1848	12242.8
1849	6093.48	1849	3893.82	1849	8329.71	1849	9021.46	1849	6182.79	1849	5681.36	1849	13476.6	1849	15027.7
1850	5183.61	1850	3904.15	1850	9940.97	1850	10397.7	1850	6602.15	1850	6232.07	1850	14751.8	1850	15109.2
1851	5525.52	1851	4412.64	1851	10352.3	1851	8906.23	1851	6897.97	1851	6627	1851	14513.8	1851	14957.8
1852	6338.21	1852	5184	1852	9951.04	1852	10253	1852	6327.26	1852	5947.76	1852	14172	1852	15133.3
1853	6972.2	1853	5232.75	1853	10211.9	1853	8573.59	1853	6586.93	1853	5022.97	1853	12938.7	1853	15126.7
1854	7291	1854	4777.44	1854	9437.01	1854	7332.6	1854	6238.87	1854	5594.4	1854	13437.2	1854	14292.3
1855	8292.97	1855	5877.82	1855	8945.31	1855	7156.64	1855	5760.8	1855	5529.02	1855	14213.3	1855	14210.8
1856	8805.15	1856	5201.16	1856	9653.12	1856	7963.1	1856	5893.95	1856	5834.71	1856	14748.1	1856	14681.7
1857	8348.33	1857	3429.63	1857	8790.47	1857	6622.93	1857	5823.03	1857	5543.05	1857	14624.9	1857	15622.1
1858	8105.15	1858	4030.47	1858	8951.23	1858	8759.69	1858	5743.48	1858	5701.4	1858	15245	1858	15496.2
1859	7836.79	1859	3232.75	1859	9703.18	1859	8465.03	1859	6098.21	1859	5890.04	1859	16294.5	1859	16414.3
1860	8330.01	1860	4802.99	1860	10364.3	1860	8871.24	1860	6026.9	1860	6120.66	1860	18201.3	1860	18015.4
1861	7710.34	1861	4457.48	1861	11885.6	1861	9814.66	1861	6092.11	1861	5939.14	1861	17885.9	1861	19457.9
1862	7485.61	1862	4441.45	1862	10463.2	1862	10001.6	1862	5783.15	1862	6402.99	1862	14187.9	1862	18554
1863	8073.77	1863	4720.33	1863	10736.8	1863	10802.3	1863	5764.46	1863	6326.72	1863	13758.4	1863	17994.6
1864	8759.75	1864	5787.42	1864	12753.7	1864	12036.8	1864	5796.79	1864	4728.94	1864	13030	1864	15910.5
1865	8118.03	1865	6826.66	1865	11684	1865	10427.7	1865	5947.3	1865	4860.13	1865	13338.5	1865	15980.6
1866	6975.1	1866	5432.66	1866	10539	1866	10770.7	1866	6922.69	1866	5589.35	1866	13915.5	1866	14771.7
1867	7454.49	1867	5511.98	1867	10520.1	1867	10071.6	1867	8040.53	1867	6634.21	1867	13194	1867	13017.4
1868	6407.68	1868	5260.28	1868	10248.8	1868	9504.93	1868	7098.52	1868	6941.19	1868	10933.4	1868	11147.1
1869	5667.44	1869	3379.84	1869	10178.5	1869	8812.13	1869	5244.27	1869	4630.4	1869	9818.06	1869	10751.5
1870	5010.19	1870	2535.75	1870	10052.4	1870	10437.6	1870	6049.24	1870	5769.19	1870	9208.14	1870	10262.2
1871	5305.78	1871	2393.44	1871	10605.1	1871	10276.2	1871	5672.73	1871	4452.55	1871	9600.68	1871	10202.8
1872	4422.38	1872	2325.98	1872	11038.5	1872	12587.8	1872	4915.53	1872	4327.41	1872	10359.1	1872	11531.9
1873	3367.74	1873	1096.51	1873	11056.8	1873	13114.8	1873	4505.22	1873	3915.42	1873	11722.9	1873	12974.5
1874	3461.49	1874	1827.22	1874	11758.8	1874	12197.1	1874	3437.98	1874	3662.74	1874	12060.5	1874	13817.3
1875	5529.61	1875	4589.15	1875	12719.8	1875	12248.3	1875	3221.84	1875	3359.81	1875	13592.9	1875	15202.9
1876	7460.13	1876	6316.86	1876	13130.6	1876	12259.1	1876	2628.8	1876	2668.75	1876	13845.4	1876	16343
1877	5987.66	1877	4753.04	1877	15855.9	1877	13193.1	1877	3103.2	1877	3723.41	1877	14022.8	1877	15663.1
1878	7328.03	1878	7097.76	1878	17641.2	1878	14150.5	1878	2268.2	1878	2747.4	1878	13209.1	1878	14569.8
1879	9548.57	1879	8058.89	1879	18611.6	1879	13279.1	1879	1874.28	1879	2052.73	1879	11532.4	1879	10416
1880	10785	1880	8242.13	1880	18588	1880	13351.6	1880	1802.67	1880	1538.95	1880	12279.2	1880	11655.2
1881	10558.2	1881	7952.36	1881	18485.2	1881	12361.3	1881	2718.22	1881	2423.62	1881	11839.1	1881	13163.5
1882	8528.53	1882	6585.21	1882	17591.8	1882	13552.5	1882	3528.65	1882	3604.95	1882	11551.2	1882	10924.8
1883	10387.9	1883	6459.55	1883	15975.7	1883	10007.4	1883	3973.24	1883	3254.18	1883	10895.4	1883	11572.5
1884	9598.51	1884	5859.27	1884	15039.4	1884	9257.15	1884	3809.2	1884	3157.28	1884	10679	1884	9425.72
1885	8609.18	1885	5759.61	1885	13781.2	1885	7762.49	1885	2807.24	1885	2447.9	1885	11272.4	1885	10053.5
1886	8094.64	1886	5437.39	1886	11597	1886	7488.85	1886	2342.04	1886	1606.48	1886	12172.6	1886	9816.74
1887	9048.78	1887	5554.96	1887	12473.8	1887	7356.29	1887	2507.12	1887	1426.97	1887	13704.9	1887	12010.6
1888	10002.2	1888	6010.09	1888	13796.7	1888	7561.21	1888	2555.42	1888	1060.13	1888	14251.1	1888	12048.4
1889	11318.8	1889	6097.65	1889	14697.4	1889	8969.86	1889	3443.81	1889	1963.67	1889	13122.5	1889	12165
1890	10328.8	1890	6668.07	1890	14291.7	1890	10079.6	1890	4486.65	1890	2492.93	1890	12915.7	1890	11995.6
1891	9554.5	1891	5719.81	1891	13637.8	1891	10075.1	1891	5103.9	1891	2837.48	1891	13610.5	1891	12452.9
1892	8670.2	1892	6346.01	1892	13322.9	1892	11165.3	1892	5757.62	1892	3600.54	1892	13388.3	1892	11590.4
1893	10050.8	1893	7331.73	1893	11705.3	1893	10368.1	1893	6223.03	1893	3658.62	1893	13592.9	1893	11992.1
1894	11209.6	1894	9249.64	1894	11602.2	1894	9114.37	1894	6451.86	1894	3611.29	1894	13841.5	1894	13477.7
1895	11759.4	1895	8909.12	1895	11660.6	1895	8686.93	1895	6459.64	1895	3411.07	1895	14047	1895	13592.6
1896	12394.6	1896	9118.84	1896	11678.9	1896	9476.91	1896	6498.54	1896	3451.41	1896	15044.2	1896	14569
1897	15105.5	1897	10553.2	1897	11789	1897	9164.02	1897	6925.3	1897	4055.98	1897	14290.9	1897	13912.3
1898	15221.6	1898	11284	1898	10998.8	1898	8426.43	1898	7395.4	1898	5366.57	1898	13754.2	1898	12199.7
1899	11739.5	1899	9864.91	1899	11834.5	1899	9162.7	1899	7890.44	1899	5229.86	1899	12838.8	1899	10503.9
1900	8769.51	1900	7241.44	1900	12263.9	1900	10424.2	1900	8153.38	1900	5488.09	1900	11558.4	1900	9698.43
1901	8659.23	1901	5548.07	1901	11430.6	1901	7460.65	1901	7656.25	1901	5654.81	1901	11147.5	1901	9513.82
1902	9135.55	1902	5991.52	1902	10930	1902	9351.91	1902	8007.23	1902	5294.94	1902	13293.9	1902	10757.8
1903	11279.9	1903	6664.56	1903	11737.7	1903	9412.01	1903	7862.81	1903	5719.01	1903	13500.6	1903	12387.6
1904	10856.3	1904	6864.4	1904	10944.5	1904	9401.89	1904	8008.89	1904	5600.72	1904	12417.9	1904	11089.1
1905	11820.9	1905	5523.71	1905	10345	1905	9318.85	1905	8149	1905	6119.52	1905	12020	1905	11305
1906	12951.6	1906	5817.64	1906	11761.8	1906	9194.71	1906	8482.29	1906	6271.39	1906	10132.5	1906	9557.84
1907	14086.2	1907	7577.56	1907	11577.9	1907	8402.16	1907	8669.26	1907	6472.31	1907	10159.8	1907	8436.73
1908	10897.1	1908	5274.83	1908	11626.6	1908	8176.63	1908	9029.58	1908	7093.51	1908	10838.1	1908	8146.55
1909	14233.4	1909	7632.71	1909	9796.93	1909	6564.82	1909	9304.5	1909	7221.73	1909	10775.6	1909	8208.38
1910	15328.7	1910	9620.85	1910	8946.4	1910	5691.05	1910	8967.7	1910	7293.79	1910	11204.5	1910	8444.51
1911	14422.9	1911	8982.06	1911	9765.77	1911	6374	1911	9110.92	1911	7200.23	1911	11319.7	1911	10066.9
1912	14808.6	1912	8378.59	1912	11441.1	1912	7678.02	1912	8779.69	1912	6488.82	1912	11663.5	1912	10022
1913	14758.5	1913	8952.59	1913	11556.1	1913	8223.55	1913	9308.9	1913	6596	1913	10993	1913	9865.06
1914	14070.7	1914	9879.06	1914	11405.9	1914	7750.49	1914	8829.69	1914	6065.77	1914	11336.6	1914	10488.9
1915	12682.1	1915	9419.63	1915	10095.2	1915	6807.66	1915	9190.46	1915	6706.57	1915	12164.8	1915	11394.2
1916	12268.5	1916	8652.41	1916	8845.83	1916	6106.98	1916	9593.61	1916	6923.57	1916	13092.6	1916	13538.9
1917	12832.4	1917	10371.1	1917	9304.72	1917	6774.38	1917	9675.27	1917	6998.98	1917	12832.5	1917	14076.3
1918	13504.5	1918	10800.4	1918	9472.67	1918	7567.44	1918	9864.42	1918	7596.69	1918	12153.6	1918	13002.1
1919	13601.7	1919	10264.2	1919	11203.3	1919	8859.15	1919	8736.69	1919	7525.15	1919	12288.2	1919	11786.1
1920	12892.7	1920	8002.98	1920	11397.7	1920	8423.93	1920	8854.95	1920	7550.79	1920	12316.1	1920	11097.3
1921	12732.2	1921	9391.25	1921	11721.2	1921	10041.6	1921	7891.76	1921	6280.8	1921	10269.8	1921	10170.5
1922	10294.7	1922	6238.32	1922	12918.5	1922	8461.97	1922	8618.61	1922	7224.11	1922	9808.16	1922	10755.3
1923	10514.8	1923	6067.73	1923	13651.8	1923	7793.06	1923	8588.99	1923	5991.37	1923	10654.6	1923	11922.8
1924	11484.8	1924	6800.91	1924	12512.6	1924	7578.01	1924	9048.64	1924	6913.85	1924	10307.4	1924	10985.8
1925	11862.1	1925	8196.77	1925	13383.7	1925	7273.51	1925	8842.63	1925	7523.29	1925	10034.2	1925	11318.4
1926	11642.6	1926	7761.6	1926	11559	1926	7426.52	1926	10024.8	1926	9278.03	1926	11098.9	1926	12207.1
1927	11793.4	1927	6485.69	1927	10735.9	1927	7556.79	1927	9582.52	1927	9287.16	1927	11524.7	1927	14599.5
1928	12071.6	1928	6759.95	1928	9744.17	1928	7184.37	1928	9827.29	1928	9166.73	1928	12417.4	1928	14789
1929	11632.8	1929	7053.81	1929	9846.93	1929	7735.26	1929	8420.81	1929	7703.84	1929	10662.3	1929	14102.9
1930	10400.1	1930	5867.69	1930	10298.1	1930	7858.34	1930	7844.8	1930	8387.55	1930	13014.3	1930	15380.7
1931	9572.5	1931	5510.81	1931	9850.72	1931	6395.76	1931	8860.09	1931	8224.04	1931	12734.3	1931	14079.8
1932	9498.92	1932	5714.43	1932	10220.8	1932	7114.85	1932	9747.93	1932	8629.18	1932	12404.6	1932	12070.6
1933	9219.57	1933	5436.75	1933	11289.9	1933	6830.81	1933	10002.8	1933	8308.27	1933	12711	1933	12660.1
1934	9389.22	1934	5231.99	1934	11866.8	1934	6733.58	1934	8819.19	1934	7866.64	1934	10967.1	1934	10870.7
1935	11032.2	1935	6550.11	1935	11903	1935	6702.34	1935	10563.4	1935	8157.12	1935	9842.09	1935	9429.95
1936	12390.7	1936	7182.7	1936	11533.2	1936	6419.52	1936	10663.9	1936	8102.11	1936	11033.9	1936	10998.8
1937	12531.3	1937	7153.11	1937	12193.1	1937	7272.64	1937	10964.6	1937	8821.13	1937	12086.9	1937	12104.8
1938	13339.3	1938	6953.43	1938	11670.1	1938	6957.91	1938	10916.4	1938	8773.94	1938	11306.9	1938	11692.2
1939	12903.4	1939	7570.03	1939	13474.3	1939	6648.74	1939	11009.6	1939	7374.43	1939	10983.9	1939	9929.87
1940	12256.3	1940	7311.99	1940	11800.5	1940	6819.49	1940	11648.6	1940	7886.85	1940	10206.2	1940	8119.45
1941	10877.2	1941	7960.5	1941	11392.5	1941	6940.03	1941	10401.9	1941	7738.94	1941	8456.79	1941	6262.38
1942	10932.8	1942	7794.58	1942	12564.1	1942	9819.19	1942	11617	1942	9240.92	1942	8295.22	1942	6004.81
1943	10162.1	1943	8220.33	1943	12404.2	1943	10780	1943	12000	1943	9654.64	1943	9674.1	1943	6355.89
1944	9457.65	1944	7324.52	1944	13255.8	1944	10213.7	1944	11222.7	1944	9132.4	1944	11064.2	1944	7725.05
1945	8703.26	1945	6614.32	1945	13147.7	1945	9635.64	1945	10874.8	1945	8844.73	1945	10784.3	1945	6815.3
1946	7607.92	1946	6021.4	1946	13009.5	1946	8995.74	1946	11176.9	1946	8634.68	1946	10665.5	1946	7570.3
1947	6187.13	1947	5433.8	1947	12348.8	1947	8235.31	1947	10545.4	1947	8865.39	1947	11827.1	1947	10144
1948	8077.88	1948	6287.25	1948	11865.6	1948	8735.54	1948	8989.63	1948	8172.03	1948	10134.1	1948	7683.55
1949	7410.15	1949	6688.68	1949	12771.5	1949	9610.15	1949	7820.47	1949	6717.66	1949	11430.8	1949	9916.28
1950	8858.23	1950	8455.16	1950	13281.5	1950	8921.7	1950	7856.44	1950	5891.76	1950	11442.1	1950	9531.47
1951	10348	1951	7314.16	1951	12106	1951	8736.81	1951	9198.25	1951	6669.48	1951	9298.14	1951	8496.88
1952	11484.7	1952	8884.96	1952	12465.4	1952	8166.67	1952	8899.06	1952	6059.38	1952	8949.57	1952	7893.8
1953	14157.8	1953	8948.89	1953	14110.6	1953	9558.69	1953	9451.5	1953	6831.45	1953	10060.5	1953	8240.66
1954	13353.5	1954	8802.72	1954	15421.3	1954	10493.6	1954	8463.05	1954	8019.99	1954	9377.19	1954	7396.24
1955	13896.3	1955	9078.99	1955	15182.1	1955	11017.3	1955	7933.81	1955	8106.8	1955	8079.99	1955	7126.27
1956	13428.4	1956	8687.35	1956	14791.6	1956	10152.9	1956	8487.61	1956	7524.88	1956	7838.63	1956	6285.28
1957	11988.1	1957	8595.67	1957	14866.3	1957	10024.3	1957	7609.93	1957	7543.92	1957	10609.9	1957	9240.25
1958	14562.2	1958	9814.94	1958	14112.5	1958	9586.93	1958	7460.36	1958	7438.36	1958	10070	1958	7881.77
1959	11088.2	1959	5748.14	1959	14674.7	1959	11068.3	1959	7371.85	1959	6828.55	1959	10356.8	1959	8217.61
1960	11290.1	1960	6070.78	1960	16019.1	1960	12650.3	1960	7344.93	1960	6365	1960	11072.8	1960	8433.62
1961	11863.9	1961	6877.96	1961	17949.8	1961	14075.6	1961	7596	1961	6286.12	1961	11938.1	1961	9348.32
1962	10951.4	1962	6569.09	1962	20888.8	1962	15646.5	1962	7419.51	1962	5540.36	1962	13527.4	1962	12005.1
1963	11155.8	1963	7239.67	1963	22142.8	1963	17347.5	1963	6883.03	1963	5836.33	1963	13399.7	1963	12355.1
1964	10657.6	1964	8831	1964	22099.9	1964	16016	1964	6360.38	1964	4728.97	1964	11601.4	1964	12119.9
1965	9914.63	1965	6870.95	1965	22132.6	1965	16958.7	1965	6281.23	1965	4378.95	1965	11349.5	1965	11437.7
1966	9565.71	1966	5768.03	1966	22047.9	1966	17165.3	1966	6474.9	1966	4580.6	1966	11735	1966	12301.4
1967	10121.5	1967	6083.56	1967	22415.6	1967	17328.1	1967	6951.49	1967	4791.04	1967	11399.8	1967	11706.7
1968	9832.15	1968	5149.41	1968	23736.2	1968	18920.6	1968	8271.78	1968	5359.48	1968	11245.6	1968	10007.2
1969	9598.2	1969	4468.78	1969	22784.6	1969	16444	1969	7873.53	1969	4953.02	1969	14433.4	1969	11561.8
1970	9294.3	1970	4473.32	1970	23131.3	1970	16724.5	1970	7161.49	1970	4849.06	1970	12796.3	1970	11461.6
1971	8592.44	1971	3687.25	1971	23431.3	1971	17038.9	1971	6916.44	1971	4586.42	1971	13358.1	1971	14221.9
1972	8041.15	1972	3588.38	1972	23460.5	1972	16190.1	1972	7448.33	1972	5674.91	1972	13384.6	1972	15313.7
1973	8167.04	1973	3879.39	1973	22389.4	1973	16156.3	1973	7904.14	1973	5488.92	1973	12132.4	1973	15078.6
1974	8345	1974	4185.29	1974	21178.7	1974	14513.8	1974	7892.89	1974	5870.31	1974	12297.4	1974	14509.6
1975	8146.59	1975	4716.21	1975	18419.5	1975	14465.3	1975	7772.75	1975	6043.66	1975	11871.8	1975	13266.6
1976	6913.9	1976	4125.54	1976	17444.8	1976	13861.7	1976	8411.61	1976	5971.18	1976	10826.6	1976	13115.8
1977	7389.22	1977	3960.06	1977	19062.1	1977	16864.4	1977	7854.17	1977	6380.07	1977	10427	1977	12262.5
1978	7297.15	1978	3497.67	1978	17217.5	1978	14778.3	1978	7381.9	1978	5731.49	1978	10818.7	1978	11578.2
1979	6450.02	1979	3241.73	1979	15507.8	1979	13434.1	1979	6741.99	1979	4850.48	1979	10165.4	1979	10091
1980	7143.16	1980	3822.78	1980	19616.1	1980	18108.3	1980	6708.51	1980	5284.39	1980	11079.3	1980	12106.1
1981	7550.28	1981	4032.7	1981	17412.5	1981	14968.3	1981	7610.77	1981	6459.34	1981	10735.3	1981	11506
1982	6475.91	1982	3584.05	1982	15538.1	1982	13600.4	1982	8057.18	1982	6648.63	1982	10136.2	1982	11392.6
1983	5777.19	1983	3353.7	1983	16758.4	1983	13811.2	1983	9111.09	1983	7443.89	1983	10159.2	1983	9087.26
1984	5607.33	1984	2672.41	1984	14697.6	1984	11879.2	1984	10584.6	1984	7606.35	1984	10039.5	1984	7646.24
1985	6059.88	1985	3092.96	1985	13460.9	1985	10062.8	1985	11044.7	1985	7803.28	1985	10370.6	1985	8375.72
1986	6818.66	1986	4080.76	1986	12282.6	1986	10088.4	1986	9817.86	1986	7656.19	1986	11430	1986	8607.78
1987	7694.82	1987	4494.97	1987	10915.1	1987	10502	1987	8834.11	1987	7391.02	1987	9629.4	1987	7628.4
1988	8360.24	1988	4859.32	1988	10188.7	1988	10294.1	1988	7611.77	1988	6588.55	1988	9969.97	1988	7833.84
1989	8620.89	1989	5153.51	1989	9429.34	1989	8494.72	1989	7153.11	1989	5505.42	1989	10260.5	1989	7995.6
1990	6815.66	1990	4282.57	1990	7542	1990	7531.7	1990	6320.43	1990	5644.19	1990	12296.2	1990	13615.2
1991	6895.79	1991	3984.32	1991	6445.97	1991	6679.5	1991	6475.68	1991	5927.29	1991	11163	1991	11909.6
1992	7224.18	1992	3798.89	1992	5722.7	1992	6199.67	1992	6014.86	1992	5517.19	1992	11357.7	1992	11278.8
1993	6714.05	1993	2919.28	1993	5482.22	1993	5696.08	1993	6633.93	1993	5677.99	1993	12225.1	1993	11932.7
1994	6057.77	1994	2890.94	1994	5029.9	1994	4948.09	1994	7872.91	1994	5820.79	1994	11266	1994	9558.33
1995	5957	1995	2793.49	1995	5301.22	1995	4942.22	1995	8030.99	1995	5387.03	1995	12036.7	1995	9353.06
1996	3953.05	1996	2427.67	1996	4258.93	1996	4267.46	1996	8939.38	1996	6376.06	1996	11020.9	1996	6755.32
1997	4085.03	1997	1959.28	1997	5957.75	1997	5202.41	1997	10042.5	1997	7243.2	1997	9138.98	1997	3843.13
[truncated: 6,003 more rows]

## Sheet: K140A-T141A
GFP		RFP		GFP		RFP		GFP		RFP		GFP		RFP
Pixel	Intensity	Pixel	Intensity	Pixel	Intensity	Pixel	Intensity	Pixel	Intensity	Pixel	Intensity	Pixel	Intensity	Pixel	Intensity	Fluorescence intensity recorded along microtubules for the RFP and GFP channels (as described in Methods) and for indicated RFP- and GFP- tagged proteins .
0	13479.2	0	13099.4	0	3922.24	0	3727.26	0	21162.7	0	17279.8	0	6534.19	0	8668.09
1	13908.2	1	13670.6	1	3967.02	1	4012.26	1	21807	1	18171.7	1	6669.32	1	8343.68
2	12789.4	2	13788.9	2	3151.9	2	3228.96	2	21392.5	2	17928.8	2	6473.98	2	8484.27
3	11807.2	3	10209.9	3	3214.79	3	3098.34	3	21602.5	3	18280.3	3	5988.72	3	7023.58
4	10767.5	4	9638.16	4	3376.62	4	3645.27	4	22237.1	4	18425.9	4	6772.96	4	8172.72
5	8646.58	5	8651.88	5	2737.09	5	2453.84	5	21606.3	5	18687.3	5	2565.41	5	2308.72
6	7563.13	6	8522.16	6	2664.19	6	2200.41	6	20159.9	6	16783.8	6	5653.22	6	6147.34
7	6216.82	7	7611.06	7	1995.5	7	1535.96	7	19862.1	7	15002.1	7	6741.7	7	7382.07
8	5276.35	8	6352.84	8	1442.91	8	1392.89	8	18673.2	8	13662.6	8	7310.63	8	8333.92
9	5499.45	9	6842.27	9	1270.81	9	1515.23	9	17929.6	9	14015	9	9447.19	9	12266.5
10	4203.81	10	4626.74	10	1159.06	10	1200.78	10	16948.4	10	12484.7	10	8906.72	10	13862.3
11	3999.97	11	4000.55	11	1228.55	11	1518.97	11	14733.8	11	10520.2	11	7834.63	11	13651.2
12	4535.7	12	4439.93	12	1815.02	12	1782.82	12	12377.7	12	9855.25	12	7773.88	12	13741.6
13	2032.45	13	2529.76	13	2359.58	13	2651.28	13	10079.9	13	7965.55	13	8822.41	13	12823.4
14	4425.55	14	4313.8	14	2451.55	14	1907.24	14	9469.85	14	7077.39	14	8474.87	14	10620.4
15	5995.56	15	5696.48	15	2522.18	15	1744.97	15	8116.78	15	5665.5	15	7046.03	15	7846.6
16	8017.98	16	6493.02	16	2000.93	16	1924.13	16	7783.38	16	5136.15	16	7914.5	16	9635.55
17	9112.9	17	7185.38	17	2138.02	17	2276.88	17	8743.91	17	6210.17	17	7779.89	17	8594.24
18	10068	18	6974.02	18	1961.86	18	2171.08	18	8752.28	18	5951.55	18	8239.29	18	10533.8
19	9167.59	19	7580.21	19	1476.02	19	1300.99	19	9494.48	19	8090.77	19	8425.19	19	12194.1
20	8640.4	20	7303.43	20	1595.76	20	1683.99	20	9887.15	20	8926.19	20	7871.41	20	9129.05
21	8567.09	21	6115.4	21	1542.71	21	1347.64	21	11098.6	21	9134.99	21	8431.16	21	10923.8
22	8666.52	22	7194.59	22	1588.62	22	1265.67	22	11641.5	22	9937.61	22	8055.03	22	9345.53
23	9405.35	23	6800.14	23	1873.02	23	1763.67	23	12468.1	23	10363.7	23	7523.21	23	11163.1
[truncated: 7,976 more rows]

## Sheet: G146A
GFP		RFP		GFP		RFP		GFP		RFP		GFP		RFP
[truncated: 8,002 more rows]

[truncated: 24 more sheets: M202A, T103A-S104A, G142A, T141A, K137A, G245A, I257A, T233A-F234A, D219A, V220A, F221A, R52A, D205A, E204D-D205E, E204A-D205A, S258A-N259A, D247A, T203A, C173A-C175A, E204A …]
