# Supplementary material for: The cooperative binding of TDP-43 to GU-rich RNA repeats antagonizes TDP-43 aggregation
Source: eLife. 2021 Sep 7;10:e67605. doi: 10.7554/eLife.67605 (PMC8523171; doi:10.7554/eLife.67605)
Supplement: Figure 3—source data 1. [file elife-67605-fig3-data1.xlsx]

## Sheet: Wild-type TDP-43
Fluorescence intensity recorded along microtubules for the RFP and GFP channels (as described in Methods) and for indicated RFP- and GFP- tagged proteins .																	Figure 3C
GFP		RFP		GFP		RFP		GFP		RFP		GFP		RFP
Pixel	Intensity	Pixel	Intensity	Pixel	Intensity	Pixel	Intensity	Pixel	Intensity	Pixel	Intensity	Pixel	Intensity	Pixel	Intensity
0	12760.3	0	10505.3	0	7148.45	0	5464.1	0	11091.2	0	10411.6	0	6510.85	0	5399.55
1	11356.3	1	9706.65	1	6989.69	1	4586.11	1	12567.7	1	14149.2	1	5731.9	1	5956.31
2	11809.5	2	10391.5	2	7098.63	2	5307.49	2	12110.6	2	13890.2	2	6136.32	2	5881.41
3	14275.2	3	12571.4	3	8246.98	3	5520.44	3	13575.6	3	16023.7	3	6805.81	3	6141.42
4	12912.7	4	12270.6	4	8278.64	4	6414.71	4	13212	4	14359.9	4	7068.95	4	7192.19
5	15633.4	5	14806.1	5	7832.21	5	5904.69	5	15875.8	5	20110.3	5	6661.73	5	6063.88
6	17591.1	6	15722.9	6	7623.29	6	5470.46	6	14282.7	6	16994.5	6	7610.68	6	6327.95
7	15875.5	7	14854.5	7	8205.49	7	5613.31	7	14823.6	7	15096.3	7	5590.28	7	4364.61
8	16723.2	8	15656	8	8228.53	8	5795.5	8	13222	8	9306.28	8	5447.23	8	4675.3
9	20171	9	16824	9	7519.41	9	5402.25	9	7683.91	9	3619.35	9	6288.97	9	4735.42
10	18142.7	10	16971.3	10	6910.56	10	4372.14	10	11145.7	10	7914.76	10	5568.51	10	3507.23
11	19645.2	11	16993.9	11	5923.22	11	4075.03	11	14351.8	11	11456.8	11	5835.44	11	3932.64
12	18773.9	12	16411	12	6312.91	12	4736.1	12	14343.8	12	14015.9	12	5117.16	12	3828.12
13	17412.6	13	16287.1	13	5456.48	13	3553.28	13	11746.6	13	11496.3	13	5946.33	13	3935.09
14	19298.7	14	16096.1	14	4412.55	14	3039.68	14	9971.93	14	10735.2	14	5527.41	14	4280.34
15	18491.8	15	13640.3	15	5029.53	15	4902.89	15	9295.81	15	8824.17	15	6225.84	15	5299.68
16	14028.5	16	9514.39	16	6448.31	16	6598.61	16	8836.26	16	8542.37	16	7987.54	16	8060.34
17	9852.58	17	6180.79	17	6492.8	17	6284.24	17	8659.23	17	8429.53	17	8222.45	17	8207.1
18	5711.13	18	2863.06	18	7808.78	18	6395.58	18	8989.2	18	8712.77	18	6930.89	18	7792.97
19	5016.49	19	2901.58	19	6918.35	19	5370.31	19	9668.61	19	10206.3	19	7715.97	19	8936.67
20	6775.51	20	6675.76	20	5401.46	20	4111.24	20	10466.3	20	11494.6	20	6862.52	20	8588.01
21	9076	21	9522	21	4094.8	21	3502.32	21	11233.1	21	11953	21	6463.69	21	9016.39
22	8250.85	22	7349.38	22	3791.09	22	3682.6	22	12154	22	11913.8	22	6945.66	22	9341.62
23	7696.96	23	6107.03	23	5116.13	23	5355.83	23	12666.7	23	11032	23	5948.14	23	8365.73
24	7347.77	24	7070.24	24	3719.27	24	3577.87	24	14218.7	24	12566.7	24	5854.01	24	7474.76
25	7598.56	25	8131.36	25	2824.1	25	3185.13	25	12072.4	25	9858.59	25	5583.71	25	7264.51
26	8936.08	26	10172.8	26	4506.01	26	4821.88	26	10332	26	7432.68	26	5189.2	26	5391.84
27	8968.11	27	8929.75	27	4813.73	27	5079.7	27	9703.08	27	6171.03	27	4260.94	27	4091.97
28	10049.5	28	9894.67	28	4448.1	28	4664.56	28	10015.2	28	7340.64	28	4657.7	28	4508.44
29	11327.9	29	9533.38	29	4564.07	29	5001.97	29	7890.35	29	4326.1	29	5246.29	29	5083.17
30	11604.6	30	9477.44	30	7130.54	30	6851.28	30	7863.97	30	5965.24	30	4830.51	30	5108.17
31	11123	31	7653.69	31	6562.89	31	6549.22	31	7937.88	31	6621.67	31	5134.23	31	5461.94
32	10012.7	32	6477.37	32	6796.35	32	7496.6	32	9677.1	32	6613.44	32	5363.01	32	5013.4
33	5240.35	33	3763.18	33	8856.87	33	8376.24	33	8246.8	33	6774.76	33	5380.01	33	5599.43
34	4521.3	34	4273.47	34	10381.1	34	8694.59	34	8481.08	34	6781.41	34	5460.78	34	5436.92
35	4636.3	35	4849.95	35	10228.8	35	8948.84	35	8866.77	35	7746.47	35	6087.13	35	6040.9
36	4934.36	36	6071.12	36	8834.55	36	7864.25	36	6842.86	36	5286.08	36	6458.44	36	6843.21
37	7612.56	37	7631.06	37	11191.6	37	9653.02	37	6730.81	37	5650.15	37	6953.02	37	8041.33
38	11661.9	38	11776.1	38	11537.6	38	9088.4	38	5652.72	38	4860.49	38	7301.44	38	7738.21
39	9656.37	39	9581.98	39	10953.8	39	9158.17	39	7298.95	39	7317.1	39	8502.78	39	10095.6
40	6829.59	40	6152.91	40	9504.07	40	7722.68	40	7791.03	40	8321.2	40	8923.82	40	9091.73
41	9785.96	41	9341.32	41	7900.84	41	6330.69	41	9959.02	41	10179.3	41	8096.69	41	6675.75
42	9076.69	42	7998.96	42	10730.1	42	8709.95	42	9372.69	42	9003.39	42	6276.34	42	5211.9
43	7849.19	43	6388.11	43	11225.1	43	8463.16	43	8081.15	43	7810.74	43	5318.51	43	4683.23
44	11477.9	44	9306.78	44	10149.8	44	7625.62	44	7277.73	44	7482.05	44	4824.76	44	3687.4
45	12290.6	45	9729.58	45	9438.12	45	7581.55	45	8865.23	45	10154.5	45	4755.89	45	3667.62
46	12351.8	46	9948.78	46	10013.3	46	8268.57	46	10698.7	46	11723.7	46	4473.1	46	2870.53
47	12123.2	47	9686.65	47	9880.4	47	8020.29	47	11345.5	47	10880.4	47	4772.76	47	3739.26
48	12889.4	48	9585.74	48	10908.5	48	8338.77	48	11264.8	48	11406.8	48	4604.12	48	3334.17
49	12864.6	49	9834.73	49	10811.8	49	8578.84	49	10465.5	49	10160.4	49	4898.74	49	3474.67
50	11279.4	50	8137.63	50	11000.1	50	7884.83	50	9190	50	10231	50	6468.3	50	5265.41
51	9253.09	51	6254.42	51	11129.2	51	8365.36	51	9416.34	51	9679.69	51	6075.08	51	5670.67
52	13003.3	52	8584.97	52	11768.6	52	9497.16	52	9117.68	52	9350.33	52	6202.06	52	5039.04
53	12294.3	53	7592.34	53	12664.9	53	10554.8	53	6832.48	53	7949.53	53	7494.59	53	5913.3
54	12101.8	54	7217.73	54	12970.1	54	10821.4	54	6887.69	54	7585.98	54	7305.06	54	5846
55	11966.1	55	8575.34	55	13164.2	55	11427.2	55	6755.9	55	5900.73	55	7797.2	55	6812.49
56	12220.9	56	9900.28	56	13312.2	56	12154.2	56	6383.24	56	5177.65	56	7659.91	56	5852.21
57	11609.3	57	8624.34	57	13392.8	57	12830.3	57	6082.29	57	4391.94	57	7513.92	57	5802.24
58	10272.1	58	7797.63	58	14380.6	58	14166.1	58	5606.58	58	3517.08	58	7963.92	58	6693.97
59	10111.2	59	7354.07	59	14461	59	13660.6	59	4154.04	59	2808.63	59	7637.18	59	7285.91
60	8057.99	60	6723.6	60	13956.6	60	12666.6	60	2815.73	60	1771.39	60	7329.27	60	5459.57
61	10154.1	61	7831.68	61	13768.8	61	11188.2	61	1931.68	61	888.237	61	8482.05	61	7156.39
62	10207.1	62	8309.36	62	12439.8	62	9623.02	62	1704.6	62	1268.11	62	8530.68	62	6694.43
63	10759.5	63	8820.44	63	13086.8	63	10298.1	63	2198.74	63	2167.95	63	8957.98	63	8683.35
64	10042.1	64	7945.04	64	12342.2	64	9624.07	64	1957.16	64	1557.22	64	9988.37	64	9911.66
65	12766	65	10264.8	65	11911.6	65	9318.1	65	2737.84	65	3164.27	65	11783.4	65	11445.2
66	12282.5	66	9521.95	66	10262.6	66	7746.79	66	1753.85	66	2485.46	66	14441.8	66	11856.8
67	13024.5	67	9201.78	67	10832.6	67	8800.52	67	2906.31	67	3105.45	67	14978	67	11251.3
68	10856.5	68	6967.01	68	10072.8	68	8288.06	68	2018.75	68	1272.7	68	17227.4	68	13764.8
69	10782.6	69	6259.21	69	9539.68	69	8068.9	69	1621.94	69	1415.53	69	16776.6	69	13690.3
70	12468.6	70	8792.77	70	9749.06	70	8476.83	70	1578.09	70	1736.6	70	18259	70	15019.9
71	14083.8	71	9940.07	71	9001.05	71	8222.77	71	1327.88	71	2833.09	71	18146.8	71	17424.3
72	14495.6	72	12399.9	72	9063.88	72	8779.9	72	2362.74	72	4797.05	72	15979.3	72	15800.6
73	15249.8	73	12770	73	8520.97	73	8505.56	73	3574.25	73	5667.06	73	15367.1	73	14641.8
74	15269.1	74	12869.9	74	7774.85	74	7899.52	74	5126.75	74	5386.04	74	13805.7	74	13703.3
75	15309.4	75	13074.1	75	7937.58	75	7975.36	75	4661.99	75	3771.48	75	15920.5	75	14637.6
76	11064	76	8661.27	76	7467.79	76	7680.56	76	2935.84	76	1213.18	76	14101.2	76	13136.6
77	8506	77	6094.08	77	6830.19	77	7658.59	77	2164.03	77	844.699	77	14931.7	77	11794.5
78	4892.93	78	3778.03	78	8954.47	78	9544.77	78	3684.89	78	1836.85	78	13738.2	78	11044.1
79	8188.41	79	6836.94	79	9765.85	79	8709.19	79	4851.55	79	4316.83	79	12866.7	79	9272.16
80	10898.7	80	9381.94	80	7831.03	80	8003.45	80	3535.44	80	4133.11	80	13173.3	80	10321.5
81	11629.6	81	10170.7	81	7597.63	81	6858.69	81	1884.22	81	3155.24	81	11901	81	9406.13
82	11990.1	82	11041.6	82	6564.73	82	6034.93	82	919.475	82	2440.97	82	11575.4	82	8585.02
83	14606.1	83	13588.6	83	4924.91	83	5033.14	83	734.973	83	1178.72	83	10825	83	8312.43
84	15143.8	84	13845.5	84	5894.54	84	5377.15	84	817.399	84	618.237	84	9111.23	84	6582.51
85	17552.3	85	14478.6	85	4643.53	85	4419.51	85	1267.93	85	1175.23	85	8617.06	85	6437.41
86	19904.2	86	16344.4	86	3279	86	3499.33	86	2371.79	86	2167.67	86	7636.25	86	5422.13
87	21716.4	87	16896.7	87	3553.76	87	3940.83	87	2753.64	87	2937.64	87	6309.43	87	4207.33
88	20742.7	88	16033.7	88	2710.33	88	3605.25	88	1266.76	88	1450.14	88	5782.86	88	3965.22
89	20672.7	89	15400.7	89	5036.98	89	5623.29	89	841.626	89	936.782	89	4649.35	89	3278.33
90	22122.4	90	15964.2	90	3986.97	90	4702.52	90	1084.89	90	177.484	90	5085.82	90	4192.95
91	21975.4	91	16364.9	91	4662.03	91	5772.67	91	2864.34	91	2306.83	91	5537.12	91	4036.37
92	23104	92	18140.9	92	6172.24	92	6431.18	92	4685.87	92	3804.48	92	8025.09	92	5369.17
93	25582.4	93	19928.5	93	7771.53	93	8363.08	93	3949.98	93	1938.39	93	7764.67	93	5681.17
94	29955.1	94	24506.7	94	7736.49	94	8056.52	94	3748.73	94	2203.19	94	8979.07	94	8282.99
95	33070.2	95	29884.3	95	8169.72	95	7828.65	95	3049.39	95	3705.45	95	8911.46	95	7635.72
96	34690.1	96	32421.4	96	6912.51	96	6147.34	96	4452.32	96	5696.76	96	8596.73	96	6299.56
97	36287.1	97	32090.8	97	7099.27	97	6529.44	97	4997.8	97	7004.18	97	7758.64	97	5905.06
98	35953.4	98	32236.8	98	7833.88	98	6448.84	98	5290.91	98	7105.39	98	5902.43	98	5403.82
99	34274.3	99	31302.3	99	6183.45	99	5447.08	99	6348.31	99	9424.68	99	5450.85	99	4418.4
100	30381	100	27654.4	100	4815.08	100	4115.86	100	8841.04	100	13896.4	100	5115.45	100	3774.97
101	27783.7	101	24114.6	101	3907.16	101	3677.39	101	13027.4	101	16253.1	101	9143.73	101	6972.88
102	22570.3	102	19925.2	102	5150.14	102	4895.48	102	16221.7	102	14858.7	102	9313.34	102	6842.27
103	19409.5	103	18640.8	103	3658.93	103	3708.12	103	16137.2	103	12036.5	103	12732	103	7844.91
104	19560.9	104	18156.4	104	3468.08	104	2878.24	104	14969.3	104	12011.8	104	13414.3	104	9880.83
105	17581.6	105	16625.9	105	4537.56	105	4174.37	105	12028.7	105	11660.1	105	16515.4	105	13226.5
106	17003.2	106	13669.1	106	4539.82	106	4305.93	106	8188.74	106	8164.38	106	17032.5	106	14763.7
107	15176.3	107	10819.8	107	5476.72	107	5568.78	107	9847.17	107	9050	107	16217.9	107	14427.9
108	12130	108	7520.05	108	5413.59	108	6034.98	108	5302.03	108	3781.65	108	15163.5	108	11473.4
109	10229	109	5030.4	109	7941.92	109	7783.38	109	7255.29	109	6027.41	109	14727.5	109	10433.8
110	8488.69	110	4531.35	110	8711.71	110	8285.05	110	7993.06	110	7985.68	110	14588.5	110	10530.2
111	8711.25	111	5246.87	111	9510.29	111	8705.15	111	9443.09	111	9128.63	111	13772.1	111	11317.5
112	10638.8	112	6825.96	112	8304.46	112	7079.23	112	13703.2	112	11981.6	112	11845.5	112	11193.8
113	11338	113	8728.04	113	8072.47	113	6573.19	113	15326.7	113	11582.2	113	11275.6	113	9800.5
114	12804.6	114	10287.6	114	7537.63	114	5783.74	114	12452.4	114	10251.8	114	11576.3	114	10348.4
115	13173	115	10022.5	115	6528.75	115	5040.92	115	11174.6	115	10552.1	115	12527.1	115	10744.1
116	19543.5	116	15595.8	116	6756.43	116	4816.51	116	12018.6	116	14002.9	116	11005.5	116	9573.94
117	17741.5	117	15757.2	117	7792.32	117	5638.63	117	14923.6	117	16115.6	117	10113.6	117	8913.98
118	18603.5	118	15905.6	118	8046.88	118	6543.92	118	17148.1	118	18683.6	118	9971.58	118	7845.94
119	20679.2	119	16558.5	119	7981.44	119	6753.48	119	19545.4	119	20102.3	119	9089.63	119	7668.81
120	20510.3	120	17311.9	120	8035.08	120	7269.87	120	21155	120	21993.9	120	9251.68	120	8198.45
121	19812.9	121	17532.8	121	8033.33	121	6767.4	121	20983.9	121	20321.3	121	9371.77	121	8077.41
122	19047.6	122	16045.1	122	8335.56	122	6257.65	122	20011.5	122	21774.9	122	10032.4	122	8118.82
123	19876.1	123	16494.2	123	8000.65	123	5720.08	123	14112.5	123	17924.2	123	10216	123	8243.12
124	19305.3	124	16058.5	124	7077.05	124	5148.76	124	19176.8	124	21792.7	124	9334.81	124	7826.62
125	18011.9	125	15580	125	5961.32	125	4591.92	125	17837.4	125	17350.5	125	8702.44	125	8059.95
126	16938.2	126	16950.8	126	5155.54	126	3982.39	126	13270.4	126	11220.5	126	9127.59	126	8587.96
127	17830.6	127	17798.3	127	4348.65	127	3171.61	127	12688.6	127	9140.39	127	12157	127	9969.97
128	20370.2	128	19670.2	128	3351.76	128	2574.6	128	8842.69	128	4886.98	128	12622.1	128	11028.3
129	26838.6	129	23714	129	2698.97	129	1872.96	129	6555.6	129	4477.57	129	13812.5	129	10543.6
130	27035.8	130	23189.3	130	2059.19	130	2068.63	130	6894.33	130	2312.18	130	14417.6	130	11807.1
131	29073.3	131	25445.9	131	1536.81	131	1789.98	131	4188.66	131	1397.66	131	13932.6	131	11485.8
132	32292.7	132	27255.3	132	1141.6	132	1975.26	132	2663.55	132	621.716	132	12781.7	132	10404.1
133	23405.3	133	16792.7	133	2198.58	133	2797.63	133	3841.4	133	936.107	133	11525.4	133	11157.6
134	25606.2	134	17846	134	1470.86	134	2261.4	134	6620.72	134	3708.32	134	10508.1	134	10441.8
135	15614.8	135	10221.1	135	2018.32	135	2577.19	135	4751.66	135	3035.66	135	10248.1	135	10731.4
136	18896.8	136	13032	136	2463.5	136	3446.79	136	5369.68	136	4202.6	136	10544.7	136	10483.1
137	16194.2	137	10860.7	137	2651.29	137	3488.67	137	7184.57	137	6600.06	137	11998	137	10242.7
138	14240.4	138	9440.19	138	3188.7	138	3486.76	138	5606.34	138	5484.08	138	11800.4	138	10586.3
139	10530.8	139	6851.46	139	2446.42	139	2609.97	139	5804.95	139	4729.39	139	14640.3	139	13740.2
140	11786.2	140	8008.73	140	2547.36	140	2852.32	140	4403.75	140	3876.87	140	12915.8	140	11131.1
141	11030.7	141	7857.46	141	2462.82	141	3128.06	141	5332.28	141	6054.84	141	10584.9	141	9394.48
142	10300.3	142	7116.71	142	2435.63	142	3013.79	142	3305.43	142	3326.94	142	9817.69	142	8265.75
143	9953.35	143	7626.48	143	2754.36	143	3229.82	143	5909.45	143	5509.09	143	9889.56	143	7238.18
144	10463.3	144	8879.05	144	3807.71	144	3911.86	144	5805.89	144	5240.77	144	9890.6	144	7620.67
145	11449.8	145	10536.7	145	8008.75	145	7966.45	145	6739.71	145	8063.4	145	9032.6	145	6589.1
146	12148.9	146	11802	146	9047.04	146	8950.69	146	10412.2	146	12197.7	146	10522.4	146	6776.63
147	13045.5	147	12265.6	147	9111.45	147	8667.83	147	12810.7	147	12995.7	147	10734.3	147	6948.72
148	14342	148	11297.2	148	8848.65	148	8840.15	148	15161.1	148	11613.4	148	10436.5	148	7636.36
149	12428.7	149	9588.26	149	7920.28	149	7871.64	149	15080.7	149	13213.2	149	11334.4	149	7855.01
150	13490.5	150	10471.8	150	7279.23	150	7256.9	150	17052.9	150	16655.2	150	9650.51	150	7568.62
151	14811.2	151	11545.8	151	7450.98	151	8245.62	151	17359.4	151	18022.7	151	8816.45	151	6604.02
152	13187.2	152	10789.3	152	7189.27	152	8019.47	152	19856.3	152	19631.7	152	9515.49	152	6819.4
153	8985.81	153	8196.6	153	7474.37	153	9434.18	153	19240.7	153	19796.8	153	11046.7	153	8553.53
154	8388.15	154	7279.19	154	7997.64	154	9969.29	154	17161	154	18829.4	154	11467.9	154	10035.4
155	9007.05	155	8595.49	155	7994.85	155	7500.36	155	22106.4	155	23787.1	155	12274.1	155	9744.77
156	10891.1	156	11044.3	156	6477.97	156	5085.68	156	18816.4	156	20541.7	156	10010.4	156	7679.23
157	13045	157	13240.2	157	4720.47	157	3828.61	157	17203.6	157	19564.8	157	11983.5	157	9890.38
158	14254.9	158	14306.9	158	2957.99	158	2291.65	158	15908.1	158	19187.6	158	12584.4	158	8794.57
159	15377.9	159	15086.4	159	2481.13	159	2672.68	159	13892.4	159	13555.8	159	12147.6	159	8628.77
160	14832.4	160	13068.9	160	1355.98	160	2391.74	160	14359.6	160	16869.4	160	12370.3	160	8814.28
161	13230.8	161	11553.8	161	783.934	161	1620.43	161	13571.6	161	17143	161	14714.9	161	11107.2
162	12082.9	162	10181.7	162	664.587	162	1445.04	162	12509.9	162	17750.9	162	16511.4	162	12346.9
163	12347.9	163	9313.1	163	403.909	163	1131.65	163	13112.2	163	16649.8	163	18344.6	163	15312.3
164	13536	164	10374.5	164	1534.95	164	2827.98	164	15514.4	164	15687.8	164	18298.3	164	15482.4
165	16611.2	165	12587.5	165	4570.85	165	5801.89	165	15866.4	165	14211.3	165	18367.7	165	14939.1
166	20330	166	15287.5	166	8015.99	166	7166.19	166	17443.8	166	16055.2	166	17536.2	166	13272.9
167	22873	167	18018.1	167	8297.12	167	5903.74	167	18403.8	167	15718.8	167	18458.4	167	13122.3
168	22058.9	168	16919.7	168	6950.16	168	5685.52	168	16707.6	168	14171.9	168	17918.8	168	12276.4
169	20736.6	169	15591.5	169	6541.28	169	5978.18	169	18684.7	169	16237.7	169	16999.4	169	11396.4
170	17392.4	170	12838	170	8036.46	170	7095.15	170	17157.7	170	14786.8	170	17754.7	170	12353.6
171	15137.5	171	11124.9	171	9528.82	171	7787.31	171	17935.6	171	15694.4	171	16536.6	171	12803.4
172	17225.4	172	13224	172	9755.29	172	8346.08	172	18568.4	172	17964.2	172	16297.5	172	11817.5
173	19295.6	173	15933.3	173	10340	173	8675.58	173	18490	173	19520.6	173	13790	173	10056.3
174	18366.5	174	13725.6	174	10993.2	174	8944.38	174	17766.5	174	16318.1	174	11762.1	174	8888.98
175	17851.6	175	12880.1	175	9712.71	175	7314.86	175	17466	175	20394.3	175	12112.5	175	10815.2
176	17723	176	12417	176	8587.46	176	5280.53	176	15631.4	176	14200.4	176	10639	176	9586.19
177	16693.7	177	11637.8	177	7846.59	177	5931	177	14499.7	177	16644.1	177	8387.56	177	8022.91
178	16425.6	178	11464.8	178	10268.2	178	8169.01	178	13176.4	178	12346	178	7935.51	178	6333.99
179	15678.3	179	10843.2	179	9814.49	179	8617.24	179	15626.1	179	12871.7	179	8823.47	179	5876.98
180	14325.9	180	10099.4	180	9311.48	180	8744.6	180	15416.6	180	13994.1	180	9461.07	180	6001.18
181	14468.8	181	11101.4	181	9581.78	181	10683.1	181	15926.6	181	14889.1	181	9627.07	181	5834.39
182	14131.3	182	10449.2	182	10220.6	182	11567.1	182	15555.1	182	16726.4	182	8939.98	182	6485.92
183	14173	183	11722.6	183	10136.4	183	11348.3	183	12367	183	14994.3	183	11536.1	183	9975.61
184	13740.6	184	10232.6	184	9148.61	184	10114	184	11531.5	184	15305.6	184	10950.2	184	9366.1
185	14024	185	10548.6	185	9019.92	185	8466.34	185	8852.67	185	13322.6	185	12158.6	185	9823.42
186	13590.9	186	12303.4	186	9470.84	186	8258.59	186	8427.35	186	13103.6	186	14825.1	186	12971.9
187	14431.2	187	13046.1	187	8540.3	187	6948.21	187	15528	187	16500.8	187	15489.6	187	13955.6
188	14530.7	188	13283.6	188	6835.55	188	6139.06	188	15614.2	188	15547.2	188	14422.4	188	11634.7
189	15286.3	189	14415.3	189	6488.42	189	5700.63	189	14936.7	189	16447.7	189	13475.9	189	9990.81
190	15205.7	190	14733.4	190	6363.61	190	5729.71	190	15352.8	190	16546.8	190	12767.4	190	10035
191	12657.3	191	12681.6	191	7502.64	191	6630.22	191	15806.8	191	17108.5	191	10721.6	191	9903.96
192	12516.1	192	12047.1	192	7983.38	192	6671.64	192	15172.7	192	18137.3	192	8332.02	192	6509.89
193	15881.3	193	15461.5	193	7407.04	193	5530.7	193	13918.5	193	17454	193	8501.16	193	6757
194	13370.6	194	10589.6	194	6674.8	194	5300.6	194	14925.1	194	19900.7	194	8556.28	194	7146.44
195	14978.2	195	11355.5	195	5119.88	195	5144.26	195	15047.4	195	19752.2	195	9743.96	195	8861.55
196	10906.3	196	8763.75	196	4751.77	196	5088.78	196	20395.5	196	23337.9	196	11615.8	196	10333
197	9508.26	197	6946.2	197	4772.83	197	4199	197	17176.4	197	20772.6	197	10922.1	197	8990.44
198	7062.34	198	5535.83	198	5666.64	198	5016.11	198	19060.1	198	20444.5	198	11439.9	198	8952.59
199	5689.58	199	4624.41	199	6355.73	199	6609.49	199	16385	199	18536.7	199	10635.6	199	9148.38
200	5801.81	200	4855.9	200	6353.27	200	6580.33	200	15952.6	200	17013.7	200	9066.52	200	7471.95
201	4218.19	201	3367	201	6439.59	201	5588.95	201	15229.8	201	13968.4	201	9449.26	201	7993.29
202	4490.09	202	3396.55	202	4525.98	202	3734.4	202	15390.4	202	14414.6	202	8723.33	202	6182.16
203	6477.76	203	4803.31	203	2726.42	203	1740.58	203	15242.4	203	13053.8	203	8436.11	203	5463.01
204	9506.43	204	6639.3	204	1143.12	204	680.25	204	14125.8	204	13577.6	204	9037.55	204	6077.54
205	6874.69	205	5087.18	205	1345.11	205	1355.79	205	11992.2	205	11464.4	205	8632.36	205	5987.1
206	5242.4	206	4938.29	206	2673.68	206	2903.78	206	11372.1	206	10403.9	206	9732.08	206	6975.17
207	6560.39	207	5032.11	207	4045.43	207	3990.45	207	10979	207	8903.52	207	10346.9	207	8405.33
208	8226.24	208	6459.66	208	5219.11	208	4784.51	208	11043.4	208	9611.22	208	11619.2	208	8384.23
209	6370.06	209	4878.27	209	6284.71	209	6319.85	209	11051.2	209	13452.2	209	13574.2	209	10408.4
210	6245.21	210	4936.04	210	7003.88	210	7376.96	210	9049.05	210	11023.2	210	13616.8	210	10731.7
211	5312.46	211	4346	211	8113.51	211	8152.68	211	8738.22	211	13113.8	211	13544.1	211	10402.2
212	7769.99	212	6551.18	212	9494.97	212	8703.19	212	7442.63	212	10495.2	212	14323.6	212	13014.7
213	5582.08	213	4669.53	213	11046.1	213	11261	213	9043.91	213	8157.26	213	12470.9	213	11886.6
214	5008.23	214	3109.41	214	11337.8	214	10861.1	214	9654.2	214	8565.49	214	10888	214	11189.6
215	3479.96	215	2597.16	215	12477.7	215	13198.8	215	12420.8	215	10845.4	215	11938.6	215	10022.9
216	2456.14	216	2060.18	216	13670.2	216	13062	216	11613.7	216	11598.6	216	11789.2	216	10311.9
217	3228.2	217	2912.42	217	14163.6	217	11601.8	217	12580.7	217	12581.2	217	14257.6	217	11694.1
218	3840.86	218	3461.97	218	14656.8	218	12262.8	218	12780.6	218	13510	218	15232.6	218	11392.1
219	5427.82	219	5594.7	219	14716.1	219	12546.8	219	12366.9	219	12746.6	219	16205.2	219	11659.8
220	6303.12	220	6371.38	220	13553.7	220	12359.4	220	13723.3	220	13477.2	220	16851.9	220	12351.7
221	7831.5	221	6015.93	221	11396	221	11056.3	221	12540.4	221	14332.5	221	17996.6	221	12675.9
222	9294.87	222	5911.51	222	9283.17	222	8887.29	222	9996.76	222	11229.8	222	17782	222	12524.5
223	7183.19	223	5034.52	223	7366.49	223	6729.75	223	10034.6	223	10374.3	223	16677.4	223	13863.2
224	5047.76	224	3090.09	224	5891.94	224	5745.05	224	6527.41	224	4691.39	224	15192.9	224	13260.7
225	3614.09	225	2484.7	225	5220.85	225	4960.05	225	6589.05	225	4370.69	225	13245	225	10995.5
226	4001.44	226	2997.76	226	3780.58	226	3503.45	226	6931.64	226	4214.73	226	10596.2	226	8662.36
227	5033.91	227	3636.12	227	5340.09	227	4491.58	227	8075.95	227	6333.73	227	9646.76	227	7744.77
228	5711.44	228	3850.32	228	6988.6	228	7034.71	228	10020.5	228	10874.6	228	7353.52	228	6651.22
229	6348.64	229	4180.65	229	5949.02	229	5837.35	229	9057.64	229	10640.9	229	6076.43	229	6052.61
230	6291.03	230	3092.5	230	7976.15	230	8785.98	230	7904.13	230	8643.18	230	5463.77	230	5975.83
231	8961.68	231	7425.42	231	7638.92	231	8422.06	231	7513.35	231	8587.95	231	5381.9	231	4993.87
232	7967.92	232	7191.66	232	7341.59	232	7529.84	232	7901.43	232	10482.7	232	6973.09	232	6119.06
233	12996.4	233	11363.9	233	7637.16	233	7140.66	233	6438.66	233	8923.4	233	6792.86	233	5843.39
234	12397.3	234	9687.79	234	7174.11	234	6455.87	234	5420.35	234	5991.23	234	10718.1	234	7734.89
235	14066.9	235	9744.11	235	7314.83	235	5836.96	235	3118.81	235	3269.8	235	11064.5	235	8547.75
236	13786.1	236	9489.61	236	7485.62	236	5872.93	236	2583.82	236	1692.19	236	11096.9	236	8136.05
237	11469	237	9317.01	237	8760.75	237	6637.44	237	4373.27	237	815.987	237	10165.3	237	7405.05
238	8544.13	238	7604.72	238	10311.7	238	8725.02	238	6848.83	238	2873.83	238	11357.3	238	8056.72
239	8355.23	239	7550.82	239	10413.6	239	9014.97	239	8636.75	239	4551.54	239	14971.3	239	10957.6
240	6402.01	240	6443.42	240	9239.18	240	8937.84	240	10466	240	8311.73	240	15407.7	240	11868.4
241	6425.99	241	5972.24	241	7468.2	241	8398.09	241	10030.8	241	8504.34	241	16965.1	241	16030.7
242	6659.45	242	6055.2	242	5621.34	242	6428.94	242	10462.1	242	9931.88	242	17555.5	242	16334
243	6647.18	243	6777.74	243	5759.31	243	6140.01	243	8130.78	243	5574.89	243	19012.6	243	15719.7
244	7388.61	244	7542.33	244	4424.73	244	4914.08	244	7916.67	244	5303.94	244	18111.8	244	16663.5
245	7148.42	245	8545.65	245	4866.42	245	4714.77	245	3874.43	245	1440.6	245	18907.7	245	17862.2
246	7961.05	246	8847.85	246	4717.89	246	4863.4	246	7671.97	246	3904.14	246	15613.9	246	16024
247	7524.87	247	8322.5	247	4075.53	247	3744.25	247	7479.44	247	4253.37	247	13540.1	247	13613.2
248	7191.81	248	7229.37	248	3429.68	248	2430.55	248	8097.68	248	5261.25	248	12757.6	248	12006.1
249	8716.59	249	8601.21	249	2241	249	1391.69	249	9295.41	249	6655.87	249	12455.4	249	11835
250	9107.96	250	7204.47	250	1730.34	250	1131.56	250	10926.8	250	9771.72	250	13607.9	250	12520
251	9404.82	251	8553.67	251	1968.18	251	1525.42	251	10173.9	251	8860.48	251	11859.1	251	11654.8
252	9843.93	252	8276.76	252	1833.96	252	1321.57	252	9481.9	252	8693.93	252	10591.7	252	10797.2
253	9573.83	253	8317.22	253	2418.58	253	2002.96	253	8012.68	253	8092.39	253	9955.91	253	9673.59
254	10498	254	8037.02	254	3330.14	254	2625.52	254	8171.32	254	7006.07	254	9771.03	254	8922.26
255	10996.6	255	8796.76	255	4163.25	255	3605.7	255	7114.02	255	6394.57	255	8423.98	255	9195.63
256	12642.2	256	10761.8	256	5341.82	256	4848.4	256	7329.75	256	6937.23	256	6328.71	256	7372.08
257	12963.6	257	9675.92	257	5607.46	257	5125.61	257	8226.26	257	8253.28	257	5832.89	257	6596.11
258	12677.3	258	8168.78	258	6321.62	258	5483	258	11614	258	10179.4	258	4123.67	258	4122.98
259	16318.4	259	11540.7	259	5458.17	259	5256.21	259	12517.7	259	12097.1	259	3252.8	259	2835.91
260	15242.8	260	9652.93	260	5562.81	260	4900.81	260	13296.2	260	12208.9	260	3265.28	260	2182.15
261	18840.2	261	13489.9	261	5491.75	261	4614.58	261	9998.4	261	7613.03	261	3794.97	261	2354.57
262	15861.1	262	11012.1	262	5055.54	262	4348.44	262	8203.68	262	7747.32	262	4822.8	262	2926.96
263	13784.8	263	9803.18	263	5044.77	263	3813.97	263	8547.38	263	8959.33	263	7433.18	263	5715.92
264	10051.4	264	8479.26	264	5696.28	264	4460.87	264	9144.46	264	9014.87	264	12406.5	264	8761.5
265	8667.93	265	8060.67	265	5248.69	265	4169.35	265	9454.75	265	9328.15	265	14155.3	265	11619.8
266	8490.18	266	8850.36	266	5257.62	266	4798.03	266	11158.4	266	15748.6	266	12603.2	266	10767.7
267	10152.5	267	11631	267	4843.74	267	4706.29	267	13219.3	267	18955.6	267	11737.2	267	9373.9
268	9582.72	268	10688.6	268	4271.45	268	3882.5	268	16361.1	268	23785.3	268	11563.9	268	11045.1
269	10249	269	10452.4	269	4621.39	269	3418.72	269	16922	269	18924.3	269	10369.8	269	10074
270	12267.4	270	11965.9	270	4021.74	270	2790.66	270	13851.3	270	11460.6	270	8505.74	270	8047.62
271	11480.8	271	11089.3	271	3368.97	271	2264.45	271	8994.12	271	5635.6	271	7297.4	271	4736.95
272	10225.4	272	8873.36	272	2843.52	272	2251.84	272	7617.62	272	5611.73	272	6094.03	272	3489.86
273	8806.16	273	7265.55	273	3038.65	273	2499.01	273	5043.78	273	3938.19	273	6985.81	273	4315.2
274	7034.58	274	6004.21	274	3279.32	274	3152.53	274	9277.34	274	6731.86	274	7376.41	274	4830.55
275	6904.1	275	5807.97	275	3426.88	275	3580.66	275	6924.8	275	6112.96	275	8253.17	275	5290.16
276	7278.28	276	5510.31	276	4271.1	276	4835.03	276	7763.44	276	6806.43	276	8455.7	276	5621.51
277	6764.39	277	5547.01	277	5821.55	277	5977.45	277	9475.86	277	7591.1	277	7900.5	277	4654.68
278	5730.81	278	4625.24	278	5789.6	278	6022.16	278	11759.2	278	9378.24	278	9013.91	278	5775.43
279	6123.39	279	4771.76	279	5754.73	279	5982.67	279	10560.4	279	8235.6	279	6755.36	279	4052.7
280	5358.78	280	3428.95	280	5603.67	280	5884.9	280	13429.9	280	11850.1	280	7688.13	280	4707.15
281	5384.32	281	3613.47	281	8586.77	281	7854.81	281	14645.1	281	13079.6	281	8002.42	281	5789.79
282	3397.98	282	2414.47	282	7476.25	282	7253.57	282	12360.5	282	10541.7	282	8956.1	282	6230.7
283	2769.59	283	2410.12	283	7295.85	283	6956.15	283	14085.8	283	13693.5	283	10243.6	283	7422.72
284	2137.65	284	1485.25	284	7318.5	284	7256.5	284	12992.3	284	14056.3	284	11508.5	284	9837.23
285	2927.56	285	2162.82	285	8823.39	285	8058.1	285	13282	285	13894.5	285	11959.6	285	9801.73
286	3380.32	286	3785.47	286	8105.82	286	7504.03	286	15609.3	286	16402.4	286	12204.1	286	10589.5
287	5162.14	287	5667.6	287	7854.41	287	7719.69	287	15013.7	287	14309.9	287	10940.5	287	9098.82
288	5808.37	288	6521.48	288	8111.53	288	7685.22	288	13354.8	288	12191	288	9024.98	288	7195.41
289	4775.96	289	4453.93	289	7743.95	289	7270.04	289	13105.1	289	11934.7	289	7785.63	289	5572.19
290	3443.57	290	2313.67	290	7292.51	290	6950.25	290	12467.3	290	13094	290	7315.57	290	5543.46
291	2733.23	291	1312.62	291	7228.45	291	6389.44	291	11860.5	291	11781.7	291	4337.57	291	2960.14
292	2472.03	292	459.298	292	7325.53	292	5786.28	292	11331	292	10945.5	292	5578.39	292	4267.68
293	2619.33	293	621.243	293	7072.15	293	5752.66	293	10074.8	293	9590.01	293	5168.11	293	3455.88
294	4522.61	294	2320.05	294	6787.18	294	5479.51	294	8925.84	294	9848.28	294	5338.43	294	3307.04
295	8293.44	295	6673.73	295	6575.72	295	5257.44	295	8815.36	295	8254.23	295	5993.18	295	4634.16
296	11897.7	296	9412.48	296	6432.76	296	5824.19	296	10105.7	296	9320.68	296	5581.96	296	4619.9
297	13808.6	297	10494	297	7023.14	297	6541.72	297	10696.1	297	9523.9	297	4664.05	297	4512.83
298	13368.3	298	9355.04	298	7072.72	298	6257.22	298	8766.89	298	9033.63	298	6360.41	298	6301.53
299	13108.5	299	10104.7	299	7524.31	299	6624.83	299	10707.3	299	9730.42	299	8101.08	299	7480.91
300	12212.3	300	9896.87	300	7879.04	300	7324.94	300	9907.2	300	9522.37	300	8844.77	300	8497.59
301	10370.2	301	9649.24	301	8475.96	301	7986.88	301	10382	301	9168.74	301	10115.4	301	8985.61
302	9493.26	302	8477.11	302	9849.76	302	9301.99	302	9073.32	302	8039.7	302	10176.8	302	8884.1
303	9014.46	303	7597.89	303	10925.5	303	10189.6	303	7623.83	303	7692.23	303	9102.47	303	8180.23
304	5053.15	304	3862.51	304	11286.9	304	10528.4	304	6127.1	304	7603.81	304	6907.94	304	5948.09
305	6355.2	305	5089.24	305	11784.5	305	11163.4	305	6171.8	305	7093.66	305	6444.04	305	5274.02
306	2962.57	306	1594.32	306	12225.9	306	11594.1	306	6810.74	306	8288.86	306	5865.35	306	4709.59
307	4557.69	307	2525.66	307	12825.3	307	12574.2	307	7199.49	307	7974.8	307	5707.27	307	5147.13
308	3744.22	308	2067.98	308	13603.3	308	13480.6	308	8124.52	308	7946.36	308	7579.64	308	6176.4
309	3956.57	309	2261.25	309	13407.2	309	13465	309	8320.39	309	8510.78	309	5866.14	309	4706.01
310	5086.39	310	3252.94	310	13730.1	310	13447.5	310	8029.55	310	8509.55	310	4321.98	310	3239.58
311	5650.78	311	3726.8	311	13171.2	311	12544.6	311	8614.07	311	11284.3	311	6356.11	311	3906.22
312	7783.78	312	5234.79	312	12469.4	312	11260.7	312	9698.31	312	12138.5	312	5371.9	312	3610.55
313	10505	313	8516.13	313	12833.5	313	11465.9	313	10738.6	313	11032.7	313	9491.28	313	7886.91
314	9217.41	314	8056.28	314	11877.1	314	10361.5	314	11179	314	10781.3	314	7970.7	314	7061.58
315	8073.97	315	7361.11	315	10502.3	315	9190.32	315	12124.1	315	12034.6	315	10480.7	315	9894.11
316	8112.99	316	5890.98	316	9484.61	316	8794.34	316	12382.1	316	11201.2	316	9987.61	316	10520.6
317	6908.56	317	3908.57	317	9151.09	317	8049.08	317	12161.7	317	10927	317	9419.89	317	9280.97
318	6515.27	318	4214.24	318	8433.94	318	8660.6	318	11752.1	318	10521.8	318	7953.51	318	9128
319	6489.67	319	4552.98	319	8386.11	319	8580.29	319	12891.2	319	11305.2	319	7441.83	319	9298.07
320	6469.18	320	3988.64	320	8387.88	320	8351.97	320	13979.4	320	13502.5	320	7486.55	320	8894.02
321	6334.01	321	4816.69	321	8140.33	321	7920.16	321	13263.7	321	12488.7	321	7801.19	321	9121.52
322	6848.87	322	4464.91	322	7690.69	322	7692.92	322	13786	322	13525.2	322	7776.2	322	8394.05
323	5464.99	323	3632.89	323	6562.79	323	7201.6	323	14533.7	323	14071.2	323	7113	323	7956.42
324	3192.66	324	1292.72	324	5884.91	324	5820.72	324	13979	324	13821.5	324	7884.85	324	8862.34
325	4132.61	325	3055.49	325	6101.48	325	5510.16	325	12954	325	12766.4	325	8432.83	325	9205.85
326	4392.71	326	4151.47	326	3941.9	326	4683.89	326	13710.6	326	13973.1	326	9416.61	326	8558.58
327	4406.63	327	4332.59	327	5874.09	327	5561.34	327	12213.9	327	11695.6	327	9366.27	327	8309.23
328	7954.32	328	7410.46	328	5898.27	328	6339.16	328	12252.5	328	11830.3	328	10401.9	328	9632.84
329	7907.06	329	7084.09	329	7133.46	329	8551.57	329	11089.3	329	10396.6	329	9365.77	329	10352.4
330	10897.9	330	9922.21	330	7090.16	330	7838.78	330	10861.3	330	10365.4	330	8333.12	330	9859.6
331	14334.7	331	13025.2	331	7076.48	331	8213.83	331	10261.6	331	10843.8	331	7729.44	331	9716.53
332	19152.5	332	17782.6	332	6993.82	332	8281.93	332	9477.88	332	9928.99	332	6568.59	332	7687.62
333	17232.7	333	16599.1	333	7368.47	333	8841.31	333	9387.19	333	8837.76	333	6096.43	333	5604.45
334	16352.4	334	15034.8	334	6640.77	334	8632.12	334	9484.83	334	10682.8	334	6367.97	334	5033.18
335	14503	335	13512.2	335	6654.72	335	7918.1	335	9930.9	335	13056.9	335	5874.88	335	5027.63
336	20778.6	336	20743.5	336	7231.24	336	8527.92	336	10114.3	336	12315	336	6894.29	336	5363.55
337	17535.2	337	17176.9	337	8271.12	337	9157.72	337	11063.2	337	11640	337	8762	337	5866.44
338	19205.4	338	18814.3	338	7345.34	338	8283.82	338	10752.5	338	11541	338	8336.19	338	5747.62
339	20127.6	339	18702.2	339	9308.67	339	8913.63	339	9483.19	339	11135.8	339	11131.3	339	7845.1
340	20259.2	340	19184.9	340	7719.6	340	7505.38	340	10947.2	340	11912	340	12045.7	340	9512.28
341	20140.2	341	20191.9	341	10318.5	341	9736.27	341	10741.1	341	10619.5	341	12489.8	341	11494.5
342	20330.1	342	18774.9	342	10579.9	342	9898.19	342	8900.94	342	9467.74	342	11977.3	342	11096.2
343	19561.8	343	17202	343	10551.4	343	10455.1	343	10058.6	343	10327.7	343	10998.9	343	9872.55
344	20705.5	344	16623.2	344	10398.8	344	10300.2	344	11022.3	344	10983	344	10617.5	344	8932.83
345	19619.8	345	15732.4	345	10152.9	345	10297.1	345	12009.1	345	13694.7	345	11330.5	345	8097.19
346	19095.3	346	16352.1	346	10462	346	10128	346	12579.2	346	13615.7	346	11934.3	346	8905.04
347	16815.6	347	15037.3	347	11420.7	347	10081.7	347	12176	347	12590	347	12120.1	347	9489.86
348	15495.4	348	13534.7	348	11118.2	348	9740.03	348	11990.3	348	12163.5	348	12660	348	9987.42
349	15490.5	349	14082.4	349	11551.9	349	10247	349	12253.7	349	14192	349	12196.5	349	10294.7
350	16821.5	350	15016.6	350	11541.8	350	9889.71	350	11988.6	350	13606	350	13461	350	8575.76
351	17986.8	351	16703.1	351	10663.4	351	8535.75	351	10406.3	351	13292.9	351	12213.1	351	7991.93
352	16318.7	352	15107.8	352	10467.9	352	7770.93	352	8154.61	352	11864.8	352	13192	352	9528.69
353	13655.9	353	11864	353	9386.38	353	5894.95	353	8717.89	353	11643.9	353	13574.9	353	10239.5
354	10135.4	354	8233.12	354	9508.53	354	5954.07	354	7268.16	354	8994.05	354	13929.2	354	10792.9
355	11174.3	355	9267.25	355	9073.21	355	5501.45	355	6910.73	355	8760.16	355	15520.3	355	12505.1
356	10847	356	9748.99	356	9252.77	356	6108.65	356	7479.42	356	10157.9	356	15549.2	356	12132
357	11553.2	357	10847.8	357	7691.63	357	5244.95	357	7206.8	357	9241.76	357	16289	357	14164.3
358	12667.1	358	11624.1	358	6613.22	358	5209.14	358	7925.62	358	9923.62	358	14758	358	13452.1
359	14125	359	12273.4	359	6212.87	359	5434.37	359	8890.32	359	8841.53	359	12957.7	359	12680.4
360	14629.1	360	13404	360	6247.21	360	6437.09	360	10058.4	360	10468.7	360	12012.8	360	10717.8
361	15101.4	361	13397.3	361	6324.77	361	5723.63	361	13024.7	361	10699.2	361	12527.3	361	11639.8
362	15717.8	362	14566.4	362	7291.69	362	7103.47	362	15744.8	362	12712.7	362	12830.2	362	11187.1
363	16702.5	363	15294.4	363	7106.98	363	6258.23	363	17140.8	363	13784.4	363	11292.1	363	10625.8
364	18251.1	364	16286.6	364	6505.24	364	4442.02	364	19156.2	364	16056.6	364	12374	364	11539.6
365	18066.7	365	16656.8	365	5341.73	365	3245.99	365	17861.2	365	13264.3	365	10000.2	365	8895.18
366	18105	366	16055.3	366	4813.24	366	2864.4	366	14764.8	366	10812.4	366	11110.2	366	9380.29
367	16769.3	367	15294.4	367	4197.33	367	1947.41	367	12694.7	367	9075.11	367	9405.85	367	7508.77
368	15883.8	368	14083.4	368	3367.94	368	2687.08	368	11551.9	368	8654.07	368	11490.2	368	10084.1
369	15871.4	369	14009.3	369	4071.74	369	3525.51	369	10117.8	369	7656.47	369	12106.8	369	10600.1
370	16495.1	370	14041.5	370	3955.46	370	3168.35	370	9320.77	370	7436.95	370	11764.7	370	9535.65
371	15652	371	14558.4	371	5221.12	371	4739.3	371	9752.8	371	9394.16	371	11488.4	371	8752.55
372	15734.3	372	15020.3	372	4951.72	372	4200.31	372	8706.48	372	8547.35	372	11542.1	372	8892.05
373	16287	373	14529	373	5192.8	373	4971.2	373	8181.34	373	9577.83	373	13334.3	373	11541.9
374	17204	374	15930.5	374	5809.19	374	5097.84	374	9582.91	374	7762.77	374	15829.4	374	13248.2
375	19526.3	375	17616.6	375	5654.43	375	5124.18	375	7652.63	375	7279.5	375	13422.6	375	10986.1
376	20300	376	17305.6	376	5741.11	376	5212.71	376	6362.64	376	4468	376	13067.2	376	9715.76
377	20624.3	377	18528.2	377	5819	377	5282.19	377	6465.51	377	6593.84	377	13269.2	377	10020.2
378	24390.7	378	21372.3	378	5888.42	378	5802.75	378	6843.52	378	6782.16	378	12698.4	378	9644.19
379	27160.7	379	23767.4	379	5816.1	379	5757.33	379	6194.82	379	5128.63	379	10156.1	379	7132.98
380	26331.9	380	23770.2	380	6189.58	380	5837.75	380	5212.93	380	3439.18	380	10631.3	380	7128.03
381	24929.2	381	21681.2	381	6382.38	381	5634.86	381	3552.15	381	1245.94	381	11272.8	381	8102.19
382	24023.4	382	21031.3	382	6446.99	382	5513.89	382	2590.46	382	849.451	382	9412.64	382	6122.65
383	21727.1	383	18318.4	383	6327.81	383	5581.02	383	4041.74	383	2390.66	383	7546.11	383	5034.21
384	20954.1	384	17639.3	384	6467.65	384	5295.9	384	6414.58	384	5385.09	384	9454.76	384	7812.94
385	21062.3	385	17056	385	6634.81	385	5252.3	385	6417.69	385	5627.54	385	9295.93	385	8142.37
386	21938.9	386	17614.8	386	6866.16	386	5726.95	386	7637.64	386	7278.82	386	8379.04	386	8093.98
387	22265.6	387	17780	387	7432.47	387	6406.68	387	8704.49	387	8448.42	387	9645.57	387	9380.25
388	21586.3	388	17489.1	388	7788.95	388	7184.88	388	5092	388	3832.05	388	11464.9	388	10527.3
389	20938	389	17457.4	389	8338.22	389	7752.07	389	2924.22	389	1175.44	389	10204.1	389	9420.26
390	21454.7	390	17829.3	390	8881.47	390	8061.31	390	2456.08	390	1266.23	390	11371.1	390	9323.59
391	21991.9	391	18713.2	391	9173.54	391	7852.58	391	3089.87	391	2018.18	391	10112	391	8321
392	21929	392	18878.1	392	9270.73	392	7536.51	392	3509.9	392	2906.48	392	10598.5	392	7509.06
393	20426.3	393	18045.4	393	9599.99	393	7543.95	393	2753.59	393	3009.57	393	10546.5	393	7870.53
394	18684.2	394	16993.8	394	10348.7	394	8189.87	394	2040.84	394	2963.39	394	8304.48	394	7703.69
395	15686.6	395	13529.4	395	11535	395	9376.85	395	1899.54	395	3323.73	395	8269.03	395	8416.11
396	13865.5	396	11108.6	396	12579.8	396	10507.7	396	2201.61	396	3718.02	396	9275.86	396	9258.56
397	11865.9	397	8729.33	397	11691.6	397	11099.6	397	2613.52	397	4564.65	397	9092.71	397	8604.52
398	11855.7	398	9108.33	398	8748.64	398	9801.51	398	4288.48	398	6541.52	398	9788.95	398	9496.19
399	8420.45	399	6443.28	399	10005.1	399	10232.8	399	5063.99	399	6817.5	399	10466.4	399	9596.14
400	8200.97	400	5829.3	400	11057.9	400	10257.3	400	5905.23	400	5893.04	400	11663.3	400	10325.2
401	12743.3	401	8989.03	401	10350.4	401	10238.1	401	5459.98	401	4392.37	401	11368	401	9462.69
402	11541.6	402	7048.52	402	9281.45	402	9914.66	402	4281.67	402	2910.54	402	10710.3	402	9024.23
403	11669.8	403	7101.91	403	8884.13	403	9795.13	403	2618.43	403	1848.4	403	9319.63	403	7764.21
404	10973.3	404	7440.17	404	9819.45	404	10191.5	404	2159.62	404	2035.63	404	9824.88	404	8723.32
405	11013	405	9104.13	405	9415.46	405	8974.13	405	1398.73	405	1339.47	405	9197.09	405	8653.17
406	10773.9	406	8835.64	406	10299.4	406	9451.14	406	1785.95	406	1510.11	406	10029.2	406	9800.81
407	10696.8	407	9772.73	407	9862.82	407	8845.41	407	4891.45	407	4422.83	407	10038.8	407	8667.74
408	10614.4	408	9619.82	408	10040	408	8666.22	408	4359.22	408	4000.46	408	10046.1	408	9013.73
409	10360.4	409	9866.31	409	9742	409	7479.23	409	4725.74	409	3941.18	409	9447.48	409	8803.56
410	12105.1	410	10853.1	410	9952.57	410	8128.93	410	3977.81	410	3900.65	410	10501.1	410	8585.68
411	13484.4	411	12293.2	411	10693.3	411	8804.18	411	3852.36	411	3342.06	411	9390.5	411	7812.69
412	13850	412	12534.7	412	10185.7	412	7835.7	412	6242.78	412	7103	412	6988.14	412	6618.78
413	15443.2	413	11837.3	413	12725.9	413	10702.8	413	6253.75	413	7398.36	413	6886.32	413	7376.25
414	16880.4	414	11206.3	414	11400.5	414	8518.53	414	6403.38	414	6824.2	414	5837.49	414	5805.83
415	15974.7	415	12506.6	415	12846.6	415	11285.9	415	8668.2	415	10951.6	415	4900.02	415	4624.48
416	14647	416	12559	416	11905.2	416	10542.6	416	7749.82	416	9315	416	6518.22	416	5842.09
417	13480.5	417	11438.9	417	11658.5	417	9837.7	417	7223.71	417	9497.55	417	5929.16	417	4538.96
418	15231.1	418	11150.6	418	10703.8	418	10708	418	6989.37	418	8796.49	418	5302.33	418	5379.98
419	16493.8	419	13096.7	419	11346	419	10342.7	419	6451.09	419	9237.86	419	4608.85	419	4371.02
420	14212.2	420	12035.8	420	11040.4	420	9820.69	420	7671.03	420	9686.49	420	4354.35	420	4411.32
421	17611.7	421	15778	421	11867.6	421	10008.5	421	9712.65	421	10376.9	421	3288.98	421	3224.09
422	15465.6	422	15146	422	12146.8	422	10508	422	9528.99	422	9450.94	422	3438.47	422	3751.47
423	14359.2	423	12516.5	423	11637.6	423	10069.2	423	8867.36	423	9208.98	423	3879.36	423	3062.91
424	15786.5	424	13602.8	424	12785.9	424	11480	424	8349.86	424	9187.52	424	3975.12	424	3515.15
425	13155.6	425	10666.5	425	11739.7	425	11827.1	425	7483.65	425	8094.19	425	3936.01	425	4345.54
426	10793.7	426	8703.18	426	9111.47	426	8805.47	426	8864.65	426	10289.5	426	4957.78	426	5184.15
427	10909.1	427	9494.31	427	9563.2	427	7900.63	427	9419.83	427	11788.8	427	6427.37	427	5889.48
428	8361.44	428	6809.42	428	9608.79	428	7695.09	428	13069.5	428	14999.1	428	8813.53	428	6795.16
429	8429.04	429	5894.68	429	9598.91	429	7219.35	429	14087	429	15788.3	429	8776.97	429	6708.43
430	8214.27	430	6295.93	430	10116	430	7543.39	430	14666.2	430	14261.3	430	9022.18	430	7399.48
431	9239.79	431	7043.67	431	10555.4	431	9105.36	431	15023.2	431	16530.4	431	12029.1	431	11083.7
432	10475.4	432	8432.12	432	7809.34	432	5086.05	432	12800.4	432	13376.2	432	14075.9	432	10690.5
433	12392.2	433	9190.35	433	6179.44	433	3344.32	433	10201.6	433	9167.06	433	14605	433	10710.4
434	10885.8	434	9551.63	434	6169.19	434	4427.9	434	10734.6	434	10688	434	10071.1	434	6201.34
435	10561.6	435	8085.22	435	6643.01	435	5369.4	435	9147.6	435	8053.4	435	9037.03	435	7585.94
436	10699	436	7952.93	436	7555.88	436	5588.63	436	10273.3	436	9118.04	436	14281.9	436	10764
437	12195.9	437	9489.82	437	8337.64	437	7051.73	437	10635.4	437	9096.1	437	14071.3	437	10653.5
438	13844.6	438	11203.4	438	8868.81	438	8668.96	438	10845.6	438	11341.2	438	14625	438	10875.6
439	13397.8	439	11909.4	439	8633.47	439	8346.01	439	10828.2	439	11158.7	439	12320	439	9126.22
440	11708	440	11207.5	440	8507.96	440	8594.88	440	8472.6	440	7721.9	440	9672.2	440	7512.5
441	10063.7	441	9359.71	441	10645.2	441	10096	441	8580.78	441	7249.08	441	8668.26	441	6193.15
442	7174.47	442	7364.72	442	12440.5	442	12180	442	7356.1	442	5863.32	442	6784.22	442	6951.82
443	6496.78	443	6064.15	443	12976.9	443	13203.3	443	7604.96	443	5768.84	443	5409.41	443	5768.32
444	6222.44	444	6121.68	444	12051.3	444	12763	444	9770.38	444	6899.73	444	5346.31	444	5645.23
445	7654.54	445	6395.27	445	11146.8	445	12457.3	445	11297.8	445	6738.53	445	4774.28	445	5713.89
446	10042.3	446	7794.81	446	10595.3	446	11885.2	446	9698.13	446	8401.75	446	3797.92	446	4075.38
447	9875.69	447	7193.71	447	9437.66	447	9203.82	447	12732.3	447	11861	447	5161.12	447	4751.75
448	15673	448	12628.7	448	8528.81	448	7103.52	448	11943.4	448	9582.85	448	5302.28	448	5127.32
449	18909.1	449	15181.5	449	9767.37	449	8280.85	449	8738.11	449	5548.57	449	5689.92	449	5674.38
450	20123.5	450	15787.1	450	10650.8	450	8491.76	450	5974.78	450	5114.34	450	6165.47	450	5955.18
451	20583.8	451	16934.9	451	10628.3	451	8871.31	451	5911.05	451	5544.64	451	6209.09	451	5570.98
452	19328.1	452	15840	452	9253.54	452	7980.65	452	6556.76	452	6231.23	452	6780.61	452	5751.2
453	16757.6	453	14457.1	453	7841.49	453	7300.65	453	6939.25	453	7686.32	453	7097.34	453	5976.18
454	17626.5	454	14748.9	454	7234.68	454	6476.38	454	7596.44	454	9081.64	454	7591.33	454	6104.81
455	17017.1	455	15269.5	455	6824.06	455	5874.18	455	8716.54	455	11458.5	455	7281.66	455	6193.31
456	14339.5	456	13294.3	456	6702.35	456	6102.03	456	9041.17	456	10074.2	456	7005.97	456	5336.93
457	12614.4	457	11932	457	6469.91	457	5414.96	457	9105.6	457	10076	457	6857.42	457	5169.66
458	11535.8	458	10245.1	458	5765.6	458	4698.96	458	8693.53	458	9753.59	458	7570.98	458	6167.32
459	13615.4	459	12607.5	459	5185.75	459	5132.11	459	8187.11	459	9256.23	459	9026.29	459	8092.27
460	16283.7	460	14839.6	460	4883.84	460	4956.25	460	8554.44	460	9043.96	460	6957.65	460	6123.46
461	14405.5	461	12337.8	461	4619.4	461	4469.81	461	8661.75	461	9068.36	461	6907.59	461	5214.09
462	14124.5	462	12665.7	462	4970.23	462	5369.36	462	9656.75	462	11355.9	462	7111.98	462	5692.04
463	12757.2	463	11736.2	463	6344.18	463	7837.92	463	10714.1	463	12757	463	7333.09	463	6078.1
464	11065.9	464	10541.2	464	5875.26	464	6823.84	464	13520	464	15859.9	464	7416.49	464	5793.03
465	12389.3	465	9724.3	465	5205.51	465	5129.67	465	13540.2	465	14478	465	7086.61	465	5468.54
466	13635.2	466	10363	466	6195.32	466	7816.83	466	12404.9	466	14338.5	466	6407.86	466	5265.6
467	12455.9	467	10098.6	467	7775.89	467	9051.34	467	12514.5	467	14369.2	467	6260.29	467	5312.73
468	14848.8	468	12204.1	468	6334.69	468	7747.6	468	12572.9	468	13465.4	468	6778.67	468	6051.49
469	15887.4	469	13673.7	469	7376.12	469	8683.33	469	12833.6	469	13772.4	469	7741.81	469	6845.77
470	15475.3	470	13916.3	470	6666.65	470	7176.64	470	12725.5	470	12599.5	470	9374.49	470	6988.38
471	14964.8	471	12786.7	471	5903.04	471	6109.31	471	12309.5	471	11346	471	10594.6	471	8023.86
472	14680.2	472	13392.4	472	5316.1	472	3159.73	472	12011	472	11801.7	472	10485.3	472	8707.41
473	17472.6	473	16613	473	4612.11	473	3203.77	473	11808.6	473	9875.1	473	9571	473	7532.04
474	17684.2	474	16171.1	474	4337.82	474	2828.98	474	10210.9	474	8761.67	474	8134.05	474	5864.9
475	17841.2	475	15696.2	475	2550.96	475	432.356	475	9390.05	475	7285.6	475	10293.6	475	7571.9
476	11687.9	476	11388.1	476	3620.38	476	1989.95	476	8700.17	476	7405.77	476	11506.9	476	8101.38
477	6945.47	477	6285.08	477	4221.16	477	2269.7	477	9881.25	477	8896.22	477	9797.97	477	6298.81
478	5116.51	478	4180.86	478	4387.67	478	2291.29	478	10323.1	478	9239.55	478	7850.24	478	5409.27
479	4437.41	479	3144.75	479	4810.32	479	2721.65	479	11102.6	479	9708.91	479	6451.71	479	5033.48
480	7118.85	480	5114.08	480	5865.16	480	4330.29	480	12194.1	480	11029.6	480	4500.29	480	3382.28
481	8305.73	481	6832.62	481	6265.62	481	4587.04	481	12554.8	481	13516.5	481	3796.63	481	4033.94
482	10498	482	8295.08	482	6747.5	482	5831.39	482	14211.4	482	15788.2	482	3078.96	482	3388.84
483	10167.2	483	7804.3	483	7450.13	483	7492.81	483	13406.3	483	13756.6	483	2601.68	483	3489.2
484	11221.7	484	8017.98	484	6813.99	484	5554.8	484	13769.7	484	14837.6	484	1677.38	484	2667.88
485	9845.66	485	8193.61	485	7447.3	485	6545.26	485	14169.5	485	15509.1	485	2122.31	485	3113.5
486	6353.77	486	6258.04	486	7722.6	486	6594.26	486	13248.8	486	12685.3	486	2351	486	3209.29
487	8220.06	487	7278.58	487	8539.48	487	6786.75	487	11895.4	487	12226.5	487	3052.07	487	3286.09
488	6003.31	488	4870.16	488	8746.95	488	6598.68	488	12915.1	488	12999.8	488	3848.28	488	3975.39
489	6063.85	489	4884.29	489	7122.72	489	4852.72	489	13361.9	489	12064.9	489	6016.78	489	6535.89
490	6889.21	490	5713.05	490	7618.97	490	5710.76	490	12698.9	490	11574.3	490	8875.52	490	8203.76
491	8910.13	491	7302.83	491	7413.29	491	6335.45	491	12268.5	491	12665.1	491	8620.14	491	7980.03
492	7795.07	492	6275.47	492	7882.7	492	7198.17	492	10784.8	492	13511.9	492	7818.04	492	6827.3
493	8271.74	493	6790.28	493	8204.07	493	8731.01	493	10499.9	493	9713.99	493	10232.7	493	9863.09
494	9420.97	494	7837.83	494	7864.64	494	7578.15	494	10559.5	494	8651.02	494	8212.64	494	7829.88
495	9176	495	7294.63	495	7980.6	495	8487.98	495	12758.5	495	9791.99	495	6658.42	495	6455.02
496	7619.88	496	5571.69	496	7728.91	496	9030.31	496	12734.3	496	9780.96	496	5228.77	496	6314.94
497	6550.41	497	4992.87	497	8019.07	497	8550.63	497	13672.1	497	12199.5	497	5020.44	497	5139.06
498	6666.52	498	5439.09	498	8030.56	498	9495.23	498	13311.2	498	11281.5	498	6238.86	498	5963.23
499	6462.41	499	5302.27	499	6787.24	499	7143.44	499	12805.6	499	12449.1	499	6402.49	499	6779.26
500	5943.57	500	4885.66	500	5656.45	500	5960.26	500	12370.9	500	13859.8	500	8950.51	500	7987.25
501	5701.57	501	4685.3	501	4758.7	501	5745.31	501	12121	501	13019.5	501	8529.12	501	7733.13
502	5321.56	502	3789.54	502	5918.66	502	5345.88	502	13094.8	502	13541.8	502	11390.4	502	10220.9
503	5366.34	503	4303.66	503	5721.17	503	5946.42	503	13089.2	503	12057.3	503	12990.5	503	13040.9
504	4968.39	504	3854.29	504	5824.33	504	5238.52	504	12385.8	504	9583.72	504	13720	504	13174.7
505	5364.7	505	4576.74	505	7124.78	505	7229.46	505	10128.1	505	7685.43	505	14877	505	13676.3
506	6075.71	506	5353.21	506	7823.32	506	8330.2	506	13590.3	506	11798.6	506	14135.9	506	13850.3
507	5960.81	507	5138.51	507	8663.33	507	8743.57	507	11712.9	507	10570.4	507	13963.2	507	14020.4
508	6206.37	508	4685.03	508	9215.26	508	9428.17	508	11418.2	508	10150.6	508	13841.3	508	13498.4
509	7619.27	509	5746.46	509	8716.26	509	8485.19	509	10364.4	509	9527.18	509	14578.3	509	13391.8
510	8676.51	510	7254.59	510	8816	510	7706.45	510	8388.3	510	8630.8	510	14272.1	510	12659.1
511	10273	511	8456.64	511	8433.09	511	7157.41	511	7891.18	511	9955.24	511	15608.2	511	12974.6
512	10620.8	512	8774.76	512	8335.05	512	8235.36	512	8695.61	512	10820.8	512	16665.9	512	13366.5
513	9542.89	513	8105.17	513	7677.58	513	6957.13	513	9559.74	513	9490.72	513	16326.5	513	14491.5
514	8290.41	514	6635.32	514	6746.24	514	5290.43	514	9483.91	514	8970.99	514	16793.8	514	14221.8
515	6689.97	515	5921.82	515	6771.62	515	5513.43	515	8067.81	515	8126.47	515	15826.1	515	13184.2
516	5759.08	516	5655.04	516	5291.94	516	4805.3	516	7702.42	516	9221.57	516	13835.8	516	12250.4
517	7064.68	517	6567.44	517	4556.65	517	4285.62	517	7339.16	517	8181.1	517	13945.4	517	12667.9
518	8081.68	518	7232.27	518	4060.95	518	4479.12	518	7975.52	518	6105.72	518	12912.7	518	10692.6
519	7829.9	519	7507.94	519	3311.06	519	3990.49	519	8615.9	519	5281.47	519	11983.8	519	10320.3
520	8533.62	520	7488.77	520	2662.72	520	3250.44	520	7301.67	520	5141.2	520	11553.3	520	9813.89
521	8477.16	521	7827.4	521	2192.29	521	2243.15	521	8369.83	521	5337.03	521	11962.4	521	12125.6
522	8065.12	522	7038.75	522	1662.68	522	1461.9	522	8094.49	522	6629.98	522	11084.6	522	9899.53
523	8116.12	523	7375.14	523	1811.23	523	1392.36	523	8526.72	523	8871.26	523	10151.4	523	9730.69
524	10333.9	524	7959.59	524	2395.7	524	1831.98	524	8569.11	524	9509.76	524	9536.84	524	8640.29
525	12658.9	525	10673.2	525	3398.69	525	2993.4	525	8609.61	525	8594.25	525	9536.78	525	7451.21
526	14738	526	12040.8	526	4770.45	526	4667.76	526	8572.91	526	9198.71	526	9962.72	526	7705.65
527	13715.4	527	11419.3	527	6301.21	527	6163.71	527	4072.83	527	2539.78	527	10967.3	527	9717.05
528	12065	528	10124.3	528	7721.21	528	7940.21	528	5840.95	528	4177.75	528	13030.5	528	11868.2
529	10503.1	529	8188.68	529	9406.65	529	9646.9	529	5254.15	529	4064.92	529	13891.1	529	13370.8
530	12865.3	530	9264.87	530	10657.8	530	11274.6	530	6716.93	530	5846.08	530	13307.8	530	11731.5
531	11522.6	531	8693.64	531	11367.9	531	12058.2	531	8025.36	531	7835.05	531	15006.9	531	14364.4
532	11982.7	532	9072.3	532	11854.8	532	11658.1	532	7081.74	532	7925.91	532	13765.5	532	12691
533	14458.8	533	12153.3	533	10715.7	533	10583.2	533	8494.82	533	8852.02	533	11494.4	533	10766.2
534	13615.5	534	11839.9	534	9877.74	534	10429.8	534	11820.9	534	12135.6	534	11340.2	534	10291.6
535	15261.2	535	13112.1	535	10740	535	11360.1	535	14014.8	535	14263	535	12188.8	535	10813.5
536	14958.8	536	11601.3	536	10844.9	536	11051.9	536	14476	536	14472.8	536	12321.1	536	10604.1
537	13391.2	537	9794.71	537	9448.39	537	10149.1	537	15737.5	537	15743.1	537	12687.9	537	11184.4
538	12500.2	538	9741.56	538	7641.2	538	7870.38	538	16485.4	538	18340.2	538	14531.9	538	14060
539	13932.3	539	10874.6	539	6805.5	539	7231.89	539	16276.5	539	18219.1	539	13688.2	539	11971.5
540	13660.1	540	10487.4	540	7726.27	540	8194.55	540	16827.6	540	18807.1	540	15538.3	540	14038.7
541	12795.7	541	9838.99	541	6564.83	541	6876.68	541	12791.7	541	13598.2	541	15200.9	541	12470.4
542	10875.3	542	8731.46	542	5409.88	542	5689.12	542	12085.8	542	12717.7	542	12879.3	542	8971.57
543	8366.1	543	7109.58	543	6697.18	543	8280.01	543	12507.9	543	13181.9	543	11347.2	543	8430.88
544	8403.11	544	6856.49	544	8391.17	544	9865.56	544	12975.7	544	14137.3	544	10660.1	544	7944.73
545	9378.51	545	7639.61	545	8582.29	545	9811.25	545	12346.7	545	13776.2	545	9788.97	545	8927.01
546	10658.6	546	8282.16	546	7612.4	546	8347.56	546	12776.2	546	13365.9	546	9891.83	546	8644.31
547	11223.1	547	8563.21	547	9065.27	547	9837.15	547	12782.2	547	13399.8	547	9444.3	547	7527.61
548	11612.2	548	8827.81	548	8359.1	548	9052.75	548	13932.6	548	14671	548	8753.88	548	6475.74
549	11089.2	549	8401.13	549	9679.47	549	9273.12	549	14499.6	549	15236.7	549	7457.1	549	5723.81
550	12598.4	550	10196	550	8621.21	550	8229.52	550	15177.3	550	16372.5	550	9090.56	550	7784.07
551	12666.8	551	10375.2	551	6949.91	551	6143.94	551	17804.3	551	19519	551	8184.6	551	7337.64
552	12602.2	552	11380.9	552	6132.26	552	6561.82	552	17220.2	552	16621.8	552	8390.31	552	7673.26
553	9550.6	553	8072.87	553	7724.16	553	8310.65	553	18447.1	553	17064.2	553	8341.76	553	6143.12
554	8010.91	554	8066.3	554	6452.67	554	6941.31	554	17140.6	554	16092.8	554	9625.84	554	6479.28
555	7163.34	555	8412.1	555	5278.29	555	5427.73	555	15390.5	555	15469.3	555	9499	555	6140.81
556	7465.76	556	7542.94	556	5518.58	556	5361.39	556	14979.4	556	15181	556	9805.99	556	6608.29
557	9690.85	557	7430.2	557	4887.96	557	4181.98	557	14766.9	557	15044.6	557	9934.82	557	7263.74
558	10510.7	558	7374.72	558	3690.4	558	2328.1	558	14879.5	558	15488.2	558	11045.3	558	7981.97
559	11370.4	559	7645.41	559	2317.69	559	1591.64	559	15471.4	559	14562.2	559	13100.6	559	10680.1
560	15019.5	560	10533.2	560	1581.5	560	632.821	560	14372.7	560	13163.9	560	13096.9	560	10215.2
561	19145.5	561	14426.2	561	1188.29	561	291.386	561	11637.8	561	9685.24	561	13844.3	561	11668.9
562	20767.1	562	18138	562	994.907	562	420.509	562	8562.44	562	7535.77	562	14817.1	562	12339
563	18999.5	563	18396.9	563	1102.71	563	437.339	563	7173.66	563	6837.81	563	15798.2	563	13238.9
564	18675.1	564	17291.8	564	1886.79	564	1507.99	564	6620.51	564	5422.25	564	15662.4	564	11938.4
565	24294.7	565	20554	565	2697.48	565	2343.59	565	7228.53	565	5989.61	565	16894.4	565	13919.1
566	21499.6	566	17400.8	566	4286.75	566	4148.59	566	7460.22	566	5962.96	566	17105.6	566	13735
567	20683	567	16606.9	567	5391.67	567	4903.63	567	5405.23	567	5052.02	567	15970.6	567	12311.6
568	19808.7	568	14415.3	568	7149.66	568	6983.27	568	5084.17	568	4283.09	568	14263.3	568	12130.8
569	18809.8	569	14014.5	569	8467.9	569	8712.84	569	4660.9	569	4188.45	569	12490.8	569	9922.74
570	17515.4	570	12920.8	570	8896.09	570	8844.35	570	3427.47	570	2868.01	570	10964.9	570	9478.09
571	17340.9	571	13793.4	571	9547.95	571	10255.8	571	3151.78	571	2750.07	571	11337.5	571	9634.96
572	12557.2	572	10735	572	10675	572	11923.6	572	2954.21	572	2486.65	572	12000.2	572	11042.4
573	9962.96	573	8176.22	573	11357.9	573	12010.3	573	2815.16	573	2589.95	573	11862.7	573	11684.3
574	8672.9	574	6550.56	574	10606.6	574	11469.3	574	3100.11	574	3522.74	574	11939	574	11058.5
575	8659.48	575	5763.99	575	9657.81	575	10704.3	575	4115.56	575	4391.54	575	11076.1	575	10536.7
576	8931.72	576	5335.41	576	8654.16	576	8805.13	576	3633.22	576	3991.58	576	10998.5	576	9850.89
577	9043.04	577	5397.4	577	7870.42	577	8090.77	577	3628.18	577	5198.43	577	11121.3	577	10710.9
578	10614.1	578	6839.76	578	7995.88	578	7936.13	578	4348.81	578	5680.71	578	11841.8	578	9973.83
579	15086.1	579	11365.2	579	7508.47	579	6923.05	579	4310.32	579	5601.56	579	12233.7	579	11384.2
580	17585.5	580	16216.3	580	5745.48	580	5384.75	580	4802.81	580	6686.15	580	12062.9	580	9925.69
581	17004.7	581	15285	581	5214.16	581	5248.32	581	5429.05	581	7196.73	581	10792.3	581	9869.14
582	19064.2	582	16620.2	582	5289.66	582	5026.42	582	5791.57	582	7199.57	582	11503.9	582	10741.9
583	21219.1	583	15615.7	583	5638.82	583	5421.44	583	6655.4	583	8339.33	583	12119.4	583	9631.34
584	20513.2	584	13779.2	584	5270.99	584	5570.12	584	7241.77	584	8497.5	584	11763.2	584	8912.68
585	15188.8	585	7987.49	585	5376.19	585	6328.35	585	8469.22	585	8906.99	585	11579.8	585	9057.79
586	16283.9	586	9040.73	586	6248.14	586	6842.8	586	9108.27	586	9612.22	586	11662.6	586	10023.8
587	15967.2	587	10173.8	587	5512.92	587	6507.28	587	9738.24	587	10010.3	587	9849.2	587	9272.27
588	14936.5	588	8747.59	588	7150.74	588	7290.06	588	10209.9	588	10072.8	588	9731.43	588	10434.5
589	14357.7	589	9473.04	589	7478.58	589	7253.43	589	10316.8	589	9006.33	589	10329.7	589	11210.2
590	8243.26	590	6939.57	590	6931.92	590	7216.01	590	10151.3	590	8590.46	590	9629.01	590	10204.6
591	8832.29	591	6428.86	591	8402.41	591	8715.33	591	10929.2	591	9799.17	591	9870.52	591	9989.45
592	8872.13	592	6007.01	592	8592.53	592	9040.21	592	10747.7	592	9443.53	592	10109.9	592	10326.2
593	10545.2	593	7816.77	593	9556.47	593	9617.37	593	10444.9	593	9725.72	593	9770	593	10419.3
594	10805.8	594	8890.31	594	10474.3	594	10891.4	594	11073.3	594	9925.79	594	10164.1	594	9955.85
595	10776.2	595	8621.69	595	9378.58	595	10345.4	595	10216.3	595	9542.33	595	10896.4	595	10601.5
596	12274.3	596	9446.74	596	10098.2	596	11582.6	596	9395.61	596	9384.93	596	10564.1	596	11199.1
597	13561.2	597	10576.2	597	12116.6	597	13378.4	597	8581.18	597	7319.61	597	10058.7	597	10695.8
598	16165.8	598	11872.5	598	11022.7	598	12401.5	598	8919.23	598	8073.95	598	9868.65	598	10210.7
599	15022.7	599	9654.47	599	9746.77	599	11618.9	599	7997.84	599	6907.94	599	9518.93	599	9389.75
600	15015.2	600	7738.82	600	11262.2	600	12023.1	600	7860.93	600	6787.23	600	9471.32	600	9708.69
601	17740.8	601	9967.53	601	12727.8	601	12569.4	601	7912.94	601	7245.91	601	9693.33	601	8530.2
602	21241.9	602	15354.9	602	11495.8	602	12200.9	602	7740.63	602	8040	602	9922.61	602	8640.58
603	23383.1	603	16012.7	603	10683.1	603	12039.6	603	7791.22	603	7998.12	603	8469.89	603	7831.07
604	23910.6	604	20464.3	604	11789	604	12319.8	604	8230.03	604	8969.66	604	8485.63	604	7469.16
605	24745.7	605	20023.7	605	11831.8	605	11797.3	605	8570.46	605	9135.94	605	7868.34	605	5919.54
606	23234.9	606	19623.2	606	10855.8	606	11150.8	606	8920.4	606	10082.1	606	8266.54	606	6977.47
607	19798.1	607	15713.3	607	10299.6	607	10583.7	607	8962.66	607	9983.14	607	7981.75	607	6101.13
608	18289.2	608	17131	608	9212.65	608	9697.89	608	9332.82	608	9679.06	608	7919.83	608	6719.8
609	18320.1	609	17591.8	609	7702.47	609	8458.56	609	10074.6	609	10573.1	609	7299.13	609	6549.34
610	18151.9	610	17057.4	610	8307.25	610	9791.89	610	11153.5	610	12662.6	610	7816.1	610	7346.06
611	17466	611	17385.8	611	9204.61	611	10765	611	12149.3	611	12412.2	611	8609.31	611	7746.5
612	16660.6	612	16638.7	612	8218.02	612	9652.08	612	12547.3	612	13112.6	612	10347.8	612	10208.8
613	15330.2	613	14546.5	613	7289.11	613	8648.14	613	13129.7	613	14918.7	613	9769.59	613	9568.51
614	13228.9	614	12684.8	614	10678.6	614	11075.7	614	12349.8	614	13038.3	614	11616	614	10596.3
615	11358.7	615	10856.2	615	9630.72	615	10014.5	615	12675.1	615	13408.4	615	12902.2	615	10976.5
616	11531.1	616	11487	616	9351.55	616	10241.2	616	12018.2	616	10930.9	616	14351.2	616	10193.9
617	9614.3	617	9259.99	617	10887.6	617	11240.8	617	10122.4	617	9091.65	617	13576.1	617	10768.6
618	8771.08	618	8100.45	618	11339.9	618	11255.5	618	11867.8	618	11239.2	618	12466.8	618	9604.23
619	8557.1	619	7320.78	619	11068.4	619	10967.2	619	11103.8	619	9771.08	619	11972	619	8876.82
620	6892.77	620	6761.73	620	10849.2	620	10129.2	620	12542.4	620	12831.4	620	10968.9	620	8798.34
621	6099.31	621	5807.51	621	10745	621	10329.3	621	11085.2	621	10947.8	621	10861.7	621	7974.26
622	8591.84	622	7346.32	622	10752.3	622	9764.83	622	10629	622	10485.7	622	10016.8	622	7303.34
623	7789.99	623	7368.39	623	11144.6	623	9650.72	623	10398.7	623	10717	623	10306.3	623	8159.07
624	3905.04	624	3790.15	624	11443.2	624	9265.67	624	11449.6	624	13267	624	9598.42	624	7338.95
625	4012.28	625	4387.22	625	11713.2	625	9892.04	625	11577.7	625	13052.8	625	8282.89	625	6526.61
626	4428.11	626	4493.39	626	12251.7	626	10584	626	11476.8	626	11456.4	626	9182.13	626	6857.98
627	7071.31	627	6774.91	627	13098	627	11096.1	627	10031.9	627	9583.62	627	8157.09	627	5951.98
628	10158.6	628	9521.39	628	13045.9	628	12170.2	628	12276.1	628	12740.3	628	8005.58	628	7321.88
629	11543.1	629	11086.1	629	13102	629	12658.5	629	11149.7	629	11615.7	629	8383.84	629	7912.24
630	13792.3	630	13623.8	630	11437.3	630	11478.6	630	11184.3	630	11364.3	630	9070.13	630	7289.02
631	15124.7	631	14743.1	631	10349.9	631	10187.8	631	12280.4	631	13299.7	631	8527.45	631	6928.95
632	17384.6	632	15954.3	632	8781.41	632	7563.25	632	10986	632	11215.9	632	8039.61	632	6780.18
633	17876.4	633	16138.2	633	7779.6	633	6948.48	633	11113.1	633	11441.3	633	7620.98	633	5225.46
634	18620.1	634	15399.1	634	6973.52	634	6115.76	634	12710.9	634	13352.1	634	8422.58	634	6558.3
635	16520.3	635	12229.7	635	6219.8	635	5297.26	635	10686.8	635	13243	635	9653.4	635	6623.61
636	15823.8	636	10472.6	636	5646.41	636	4970.62	636	10372.2	636	13229.3	636	9271.65	636	5753.96
637	12819.2	637	10176.4	637	4551.59	637	4108.5	637	9384.33	637	11478	637	8768.33	637	6070.65
638	11054.6	638	9716.62	638	4321.03	638	4014.02	638	8240.88	638	10337.2	638	9906.87	638	8079.92
639	11569.3	639	10471.6	639	3892.99	639	3571.74	639	7758.34	639	8656.99	639	9367.22	639	7340.26
640	12572.2	640	11537.5	640	3533	640	3235.8	640	7768.31	640	8490.54	640	10666.9	640	8525.84
641	11980.2	641	10580.2	641	3465.08	641	2908.97	641	7571.38	641	7139.61	641	10776	641	7930.5
642	10982.3	642	9460.4	642	3958.62	642	3205.55	642	6531.93	642	6654.01	642	9967.09	642	9313.45
643	9277.9	643	9081.1	643	5364.18	643	4131.31	643	5615.99	643	5440.04	643	10199.6	643	8622.92
644	9061.75	644	9220.53	644	5730.87	644	4217.73	644	4639.12	644	3344.6	644	10890.9	644	8784.59
645	7793.66	645	8263.78	645	6701.63	645	5508.59	645	4950.16	645	3955.47	645	11516.5	645	9075.39
646	5165.02	646	5965.96	646	6609.04	646	5380.01	646	5019.16	646	3958.73	646	13070.4	646	10097.4
647	3465.37	647	4479.77	647	7165.39	647	5593.34	647	5572.57	647	4751.78	647	13529.9	647	11365
648	3749.28	648	4410.19	648	6383.75	648	4981.62	648	5618.77	648	4357.4	648	14958.3	648	12240.5
649	6801.28	649	7111.47	649	6580.35	649	4435.79	649	5774.24	649	4835.28	649	14413.9	649	11577.2
650	12365.3	650	11513.3	650	6795.75	650	5141.63	650	5831.95	650	4597.82	650	15416.4	650	12856.5
651	10098	651	9298.68	651	7480.54	651	5458.51	651	5175.05	651	4949.85	651	14017.9	651	11519.3
652	8887.59	652	7952.55	652	7951.26	652	6133.98	652	5225.53	652	5201.62	652	14790.1	652	12419.5
653	9908.54	653	8040.76	653	8431.21	653	6860.58	653	6036.04	653	4181.73	653	13519	653	11686.7
654	11091.8	654	7820.71	654	8875.26	654	7621.64	654	6220.79	654	4600.59	654	13500.4	654	11898.8
655	16446.4	655	10629.7	655	9874.95	655	8632.85	655	8055.3	655	6306.63	655	12787.3	655	11053.3
656	15699.2	656	10509.7	656	8737.33	656	8150.4	656	8093.77	656	8509.6	656	12630.3	656	10838.4
657	16489	657	11113.8	657	8768.16	657	7307.68	657	7157.37	657	6735.8	657	10947.6	657	8324.18
658	16249.9	658	11283.4	658	10140.9	658	9268.08	658	6345.96	658	5822.82	658	10802.8	658	8094.72
659	11893.5	659	7713.73	659	9547.1	659	7898.23	659	6207.25	659	5558.52	659	10369.3	659	7937.36
660	8415.23	660	6184.41	660	9881.83	660	9518.41	660	5563.61	660	6138.27	660	9737.08	660	7539.37
661	7255.82	661	5619.64	661	9334.23	661	9451.89	661	7840.65	661	7439.21	661	10235.7	661	7835.67
662	7564.9	662	4661.9	662	8309.69	662	8868.47	662	5931.77	662	6474.44	662	9416.35	662	8082.87
663	7716.14	663	4115.64	663	7212.55	663	8379.52	663	6215.43	663	6892.48	663	9821.42	663	8574.56
664	9396.62	664	6195.94	664	6001.05	664	6135	664	7444.12	664	7988.4	664	9345.55	664	6776.38
665	12463.8	665	10774.5	665	6464.12	665	6570.93	665	6045.93	665	6812.47	665	8796.69	665	6859.95
666	15089.6	666	12611	666	6317.13	666	6687.63	666	5054.58	666	5474.6	666	7797.28	666	6398.75
667	12570.1	667	9124.81	667	6903.92	667	6456.07	667	4996.28	667	4718.29	667	8245.19	667	5939.98
668	7525.83	668	3973.71	668	7571.5	668	6792.19	668	5727.12	668	5060.31	668	8418.94	668	5801.48
669	8047.88	669	5173.61	669	8342.1	669	7545.07	669	6724.1	669	6068.21	669	9985.14	669	6985.53
670	5845.97	670	3802.32	670	8418	670	8260.15	670	6708.13	670	6532.34	670	10278.7	670	8980.12
671	10480.2	671	7030.19	671	8990.27	671	9180.42	671	7077.87	671	7969.67	671	10690.6	671	8682.8
672	13775.3	672	11484.8	672	9405.37	672	9593.76	672	7697.72	672	9156.72	672	12323.7	672	11383.6
673	12847.3	673	10846.6	673	9181.4	673	9687.91	673	8235.49	673	9358.75	673	12756.2	673	12217.3
674	14828	674	13491.6	674	9728.86	674	9257.67	674	7628.03	674	8989.82	674	12643.4	674	11891.7
675	17874	675	17383.9	675	10030.3	675	9694.27	675	8059.35	675	9789.84	675	12235.9	675	11134.4
676	17366.4	676	15825.6	676	10028.3	676	10105.5	676	6141.19	676	8015.93	676	11817.6	676	10298
677	17123.6	677	15238.5	677	10066.9	677	9562.68	677	5450.85	677	7535.98	677	11270.6	677	8720.19
678	16703.1	678	14640	678	9895.29	678	9366.71	678	4722.49	678	6081.98	678	11274.8	678	7204.64
679	16562.3	679	13744.4	679	10191.3	679	9968.02	679	4285.98	679	5286.02	679	10397.4	679	6726.27
680	13802.7	680	11728.4	680	9928.6	680	9278.76	680	4759.18	680	4605.01	680	10755.4	680	5383.55
681	13008.1	681	9907.61	681	8715.24	681	8857.89	681	6024.91	681	5780.79	681	12556.2	681	6997.16
682	10228.5	682	6883.87	682	8647.54	682	8762.67	682	7793.56	682	6193.83	682	15371.5	682	10364.7
683	8138.61	683	4742.58	683	8193.65	683	8887.76	683	9189.04	683	7642.42	683	13269.3	683	8869.24
684	6739.33	684	4233.89	684	7464.73	684	8722.79	684	8636.26	684	9321.43	684	12962.1	684	8839.89
685	4562.43	685	3177.24	685	7779.78	685	9119.32	685	7388.64	685	7958.76	685	12751.9	685	9223.77
686	3216.65	686	2207.45	686	8399.54	686	10012.5	686	5690.88	686	6030.44	686	12097.3	686	9278.02
687	3818.1	687	2766.73	687	7852.8	687	9705.45	687	5084.25	687	5291.97	687	11032.5	687	8292.01
688	2745.01	688	1675.52	688	8577.93	688	9729.63	688	4514.77	688	5215.78	688	11553.7	688	10086.1
689	1532.7	689	1184.83	689	8644.41	689	9978.93	689	4141.96	689	4858.9	689	10851	689	10570.7
690	2184.85	690	2691.97	690	8603.65	690	9618.84	690	3912.02	690	4614.15	690	8751.09	690	7387.58
691	1617.39	691	2255.42	691	9124.77	691	9331.24	691	4143.95	691	4331.15	691	8588.98	691	6084.55
692	5018.48	692	4465.7	692	8772.05	692	8957.32	692	5478.74	692	4834.56	692	8995.16	692	6620.25
693	7365.3	693	5527.11	693	8440.17	693	7975.22	693	7011.48	693	5838.65	693	7754.55	693	5593.02
694	7824.98	694	5741.79	694	7949.73	694	7180.81	694	12696.6	694	12179.2	694	7750.53	694	5129.23
695	7891.56	695	6358.23	695	7787.98	695	6672.94	695	9809.86	695	7918.71	695	8410.09	695	5995.71
696	10217.1	696	9210.5	696	7581.2	696	6649.72	696	9147.6	696	8013.25	696	9329.77	696	6141.14
697	12834.2	697	10336.8	697	7308.89	697	6603.39	697	7747.57	697	7664.19	697	8977.28	697	7760.75
698	12848.7	698	9937.76	698	7328.35	698	6665.59	698	6681.81	698	7179.99	698	7159.88	698	7014.77
699	12010.8	699	9474.35	699	7594.98	699	6510.3	699	6577.23	699	6790.58	699	6375.72	699	5995.69
700	13863.1	700	11698.1	700	7553.57	700	6612.73	700	6870.96	700	6637.88	700	6962.61	700	5453.24
701	15785.2	701	12422.4	701	7180.48	701	6369.62	701	7650	701	7819.75	701	9446.03	701	6846.85
702	15555.3	702	13026.3	702	6966.12	702	6395.21	702	7893.58	702	7822.29	702	10803	702	8479.64
703	14292.3	703	12497.9	703	6284.92	703	5592.31	703	7802.44	703	7953.48	703	11483.7	703	8894.25
704	14178.9	704	12471.4	704	6561.47	704	6292.21	704	8307.82	704	7830.67	704	11552.3	704	9331.09
705	13962.4	705	12411.8	705	5791.86	705	6167.69	705	7786.01	705	8074.41	705	9872.83	705	8633.08
706	14065.8	706	12303	706	5679.36	706	6355.39	706	7888.81	706	8107.76	706	9296.95	706	7217.29
707	15032.1	707	12277.2	707	6604.91	707	6616.2	707	8152.95	707	8951.31	707	9921.67	707	6628.89
708	16541.5	708	13078.3	708	7035.52	708	7471.92	708	8670.52	708	10679.1	708	9591.37	708	7149.85
709	17024.2	709	14229.3	709	7254.76	709	7822.93	709	8973.47	709	11206.5	709	9404.94	709	7788.21
710	15987.3	710	14044.2	710	8522.58	710	9531.96	710	8646.72	710	11053.3	710	8588.77	710	6701
711	13909.4	711	11957.1	711	8166.88	711	9154.23	711	8785.26	711	11839.5	711	8342.11	711	6715.18
712	12363.5	712	9975.54	712	8480.02	712	9646.75	712	9322.53	712	11609.8	712	7134.46	712	5671.14
713	14627.4	713	13093.2	713	9042.14	713	9654.68	713	9952.08	713	12193.5	713	8302.31	713	6119.58
714	15622.6	714	14009.5	714	10608.6	714	10964.5	714	9754.23	714	11970.2	714	8273.88	714	6999.89
715	17093.6	715	14302.7	715	10095.7	715	10198.7	715	9464.32	715	12077.5	715	8538.38	715	6454.63
716	17232.8	716	13350.9	716	10145.8	716	9935.16	716	9039.79	716	11048.6	716	9339.41	716	7089.63
717	16725.1	717	13311.8	717	9164.07	717	8893.1	717	8225.21	717	8672.75	717	8940.35	717	7384.69
718	16859.4	718	13626.3	718	8631.22	718	7600.83	718	10575.9	718	11520.7	718	9955.3	718	7903.35
719	16944.1	719	14210.3	719	9453.36	719	7744.23	719	11046.9	719	10594.4	719	9778.23	719	7329.98
720	17361.5	720	15534.4	720	10915.3	720	8359.03	720	12370.2	720	11356.2	720	12307.8	720	8595.76
721	19281.7	721	17344.6	721	10964.3	721	9190.31	721	12536.4	721	12037.8	721	13998.9	721	9752.52
722	21339.7	722	18835.2	722	11365.4	722	9788.18	722	12057.2	722	10977.3	722	13506.9	722	9691.89
723	21514	723	18691.5	723	11629.6	723	10121.1	723	11259.6	723	10104.1	723	13784.6	723	11307.1
724	22021.4	724	17879.1	724	10701	724	10456.4	724	10861.6	724	10687.2	724	12594.7	724	11154.6
725	21231.5	725	16491.7	725	11301.4	725	10860.5	725	11774.3	725	12374.9	725	12207.1	725	10511.3
726	19522.2	726	15379.4	726	10219.9	726	9906.89	726	13994.5	726	14779.8	726	10688.9	726	8875.32
727	19123.4	727	15346.1	727	9220.58	727	9077.04	727	14917.8	727	15192.8	727	9743.62	727	8993.03
728	17671.9	728	14950.1	728	8416.59	728	8351.44	728	14441.7	728	12502.1	728	10104.9	728	10002.2
729	17554.4	729	17214.1	729	7667.61	729	8284.67	729	12975	729	11617.1	729	10506.5	729	10388.7
730	18041.5	730	17135.3	730	6533.15	730	7782.75	730	11676.6	730	11141.8	730	10427.4	730	9230.57
731	17006.5	731	15956.7	731	5877.86	731	7034.07	731	11668.9	731	12376.6	731	10058.8	731	7847.9
732	15452.1	732	13873.8	732	5838.25	732	6905.17	732	11676.8	732	11364.8	732	10059.6	732	7502.26
733	14436.5	733	12928.7	733	5105.11	733	6184.17	733	10867.8	733	9214.83	733	11663.1	733	9614.14
734	13260.1	734	11786	734	5608.83	734	6416.73	734	10656.3	734	9195.35	734	11838.1	734	9069.76
735	17620.9	735	17131.4	735	5282.55	735	6303.08	735	10875.8	735	9379.29	735	11124.8	735	8880.57
736	16024.4	736	15237.6	736	5523.61	736	6256.4	736	10788.3	736	8558.27	736	9624.93	736	8283.33
737	15789.7	737	15725.2	737	5651.61	737	6289.8	737	11310.3	737	8788.01	737	8816.41	737	8358.97
738	24790.7	738	23619.1	738	6548.5	738	6625.43	738	13302.2	738	10624.6	738	6517.98	738	6591.45
739	20840.4	739	20101.2	739	7687.1	739	6560.55	739	10716.8	739	8493.33	739	7088.42	739	6142.07
740	23218.6	740	20993.3	740	9081.81	740	7016.84	740	11374.3	740	7367.39	740	7300.73	740	6315.71
741	23795.3	741	21298.1	741	9268.85	741	9208	741	11150.9	741	8216.03	741	8950.58	741	7878.97
742	22893.1	742	21271.4	742	7428.66	742	7275.34	742	11223	742	8249.73	742	9546.01	742	8388.22
743	25889.1	743	23710.8	743	8770.73	743	9385.84	743	12268.7	743	9215.56	743	9685.41	743	8288.26
744	27006.3	744	24007.2	744	9834.8	744	11176.4	744	12240.1	744	9929.97	744	10404.8	744	8437.61
745	30132.7	745	27375	745	9470.46	745	11700.9	745	12656.6	745	10947.5	745	9945.4	745	8407.68
746	32835	746	28513.8	746	8562.53	746	10360	746	12560.1	746	11422.1	746	9815.81	746	7203.93
747	31065.3	747	25755.9	747	7932.7	747	9909.05	747	13006.7	747	12554.6	747	9625.43	747	6560.63
748	26929.2	748	21146.5	748	7312.29	748	8778.35	748	13186.1	748	13182	748	9979.61	748	6820.13
749	21880.9	749	18278.1	749	6097.59	749	7326.02	749	13534.5	749	11347.8	749	10191.3	749	6848.89
750	17364.6	750	15010.2	750	4851.45	750	5709.36	750	13882.5	750	11275.7	750	11891.6	750	9261.52
751	25928.2	751	22197.9	751	6906.66	751	8716.46	751	14030.9	751	12387.1	751	12308.9	751	9037.5
752	27662.6	752	22604.4	752	6190.58	752	7446.36	752	13430.8	752	11971.7	752	10935.2	752	9472.98
753	24244.7	753	18185.9	753	9098.56	753	10022.3	753	13607.6	753	11656	753	12475	753	9830.83
754	26901.2	754	21184.1	754	9269.45	754	10174.4	754	13427.8	754	12394.5	754	11473.3	754	9598.03
755	21621.9	755	16924.3	755	7524.41	755	7725.87	755	11991.3	755	12712.8	755	11965	755	9887.94
756	18557.1	756	13861.9	756	7433.53	756	7803.36	756	9687.77	756	10429.5	756	13661.1	756	11135.7
757	22193.2	757	17411.2	757	6094.53	757	6689.71	757	7904.35	757	7342.43	757	14974.8	757	12795.6
758	18898.1	758	15413.3	758	5930.22	758	6974.5	758	7155.73	758	6625.72	758	15286.5	758	12550.2
759	16967.2	759	13732.4	759	4881.24	759	6706.23	759	6519.56	759	5427.94	759	15757.3	759	13515
760	14327.8	760	12518.2	760	4281.04	760	5179.27	760	7415.16	760	5166.09	760	15030.6	760	13966.9
761	14534.3	761	12019.9	761	4633.85	761	4617.23	761	7062.86	761	5271.59	761	14461.6	761	13943.4
762	14393.7	762	10787	762	3992.94	762	4318.93	762	7522.49	762	6000.15	762	13472	762	11677.6
763	14639.6	763	10379	763	3808.39	763	4405.92	763	7523	763	6061.18	763	12761.9	763	11484
764	15366	764	11057.5	764	4199.46	764	4829.24	764	7365.84	764	6762.82	764	11198.3	764	8718.44
765	14995.1	765	11514.9	765	4837.66	765	5227.33	765	7687.08	765	7773.46	765	10827.8	765	8328.29
766	14903.5	766	11518.5	766	5077.03	766	5312.34	766	7940.51	766	7267.57	766	11039.5	766	9491.17
767	13672.8	767	11256.6	767	5842.79	767	5897.17	767	8232.02	767	7763.95	767	13681.6	767	10432.9
768	13821.4	768	10783.8	768	6605.78	768	6419.19	768	8307.99	768	6910.34	768	14345.2	768	11225.5
769	12469.8	769	10718.5	769	7432.95	769	7706.81	769	9260.28	769	7406.16	769	13398.9	769	9659.6
770	12345.5	770	10891.1	770	8319.46	770	7788.89	770	9821.29	770	7949.01	770	12883.4	770	9236.86
771	12728.8	771	11407.8	771	8668.04	771	7715.32	771	9680.31	771	8083.76	771	12042.2	771	8435.17
772	13067.4	772	11742.8	772	8935.23	772	7879.26	772	10021.1	772	7396.44	772	11232.2	772	9151.23
773	13558.6	773	11201.9	773	8085.12	773	6816.04	773	11340.2	773	8017.5	773	11792.5	773	9549.72
774	14765	774	12856.5	774	8073.28	774	6721.65	774	12369.1	774	8660.12	774	10945.6	774	9291.73
775	16206.2	775	14977.3	775	8084.03	775	6546.21	775	13097.3	775	9518.23	775	11416.2	775	9739.99
776	16545.9	776	15677	776	7886.24	776	5861	776	13048.4	776	9671.12	776	12654.8	776	10374.7
777	16487	777	15529	777	8662.82	777	6669.69	777	12683.3	777	9803.79	777	12969.3	777	11252.8
778	15631.1	778	14320	778	8117.71	778	6009.17	778	12286.2	778	10652.4	778	13693.3	778	11958.5
779	15789.4	779	14804.1	779	7876.12	779	6337.42	779	11871.5	779	10044.9	779	16191.5	779	13098.8
780	16141	780	14312.1	780	8310.16	780	7319.43	780	11236.1	780	9886.29	780	18286	780	14302.8
781	18080.5	781	15058.6	781	8251.27	781	8389.42	781	11063	781	9244.72	781	18752.2	781	14392.6
782	20333	782	18563.7	782	6643.52	782	7498.99	782	13153.9	782	10628.5	782	17651.8	782	13798
783	22672.3	783	22392	783	7284.15	783	7647.2	783	13367	783	10537.2	783	16940.1	783	13144.9
784	24340.1	784	23945.1	784	6601.89	784	6962.58	784	13635.4	784	11471.4	784	16650.5	784	13655.4
785	20711.3	785	20342.9	785	3879.86	785	4332.13	785	14132.4	785	11092.1	785	16781.7	785	15281.3
786	19408.9	786	18694.4	786	4849.31	786	5123.11	786	13909.6	786	11819.6	786	17164.3	786	16145
787	17343.4	787	16586.7	787	6289.59	787	6402.11	787	12248.9	787	9194.88	787	17334.9	787	16629.1
788	16710.6	788	14925.7	788	6679.41	788	6725.48	788	12329.3	788	9357.09	788	18305.4	788	17511.2
789	13942.4	789	12596.6	789	4342.92	789	3709.03	789	11364.4	789	8495.89	789	17892.1	789	17782.5
790	13592.1	790	10931.4	790	5887.35	790	5648.05	790	11520.2	790	8667.64	790	17693.6	790	18221.1
791	13218.2	791	10785.2	791	5878.26	791	5281.57	791	10677.1	791	8271.14	791	18238.3	791	17337.1
792	12043.4	792	10185.7	792	5936.83	792	5395.4	792	9886.03	792	9203.63	792	19331.4	792	15630
793	11625.5	793	9880.54	793	6590.28	793	5534.23	793	10480.4	793	9212.27	793	22616.2	793	18225
794	10701.8	794	10126.8	794	7510.42	794	5767.07	794	10233.2	794	9188.3	794	24897.7	794	18696
795	11086.5	795	11260.6	795	7367.81	795	5116.69	795	10362.4	795	10552.2	795	24209.2	795	18031
796	11425.6	796	10863.4	796	6610.66	796	4221.2	796	9495.37	796	10475.4	796	23772.8	796	18080.3
797	10267.2	797	10003.2	797	5948.05	797	3381.08	797	8069.9	797	8223.26	797	21584.6	797	17489.4
798	10912.6	798	11320	798	8839.17	798	5852.23	798	7539.66	798	8205.22	798	20218.6	798	16065.8
799	11221.9	799	10597.4	799	11691	799	8986.87	799	5974.34	799	6426.9	799	19134.4	799	15035.4
800	12052.9	800	10440	800	11621.9	800	9736.07	800	6370.68	800	5087.11	800	18356.3	800	14089.9
801	12420	801	11195.2	801	13221.4	801	11553.2	801	9662.86	801	9185.92	801	16940.6	801	14250.7
802	12680.4	802	12166.7	802	12574.4	802	11936.6	802	8459.15	802	7154.14	802	14912.7	802	12806.9
803	13266.1	803	12587.6	803	11653.6	803	11308.9	803	9883.08	803	9708.97	803	13268.2	803	11015.2
804	13227.9	804	11952.8	804	11250	804	9954.48	804	9850.69	804	9897.95	804	12274.3	804	10492.6
805	12625.8	805	10986.5	805	10503.1	805	9476.48	805	9079.98	805	9616.84	805	11379.8	805	8934.35
806	12701.7	806	9451.4	806	10370.4	806	8997.41	806	9758.95	806	11617.7	806	10811.6	806	8353.72
807	13915.4	807	11320.7	807	9211.62	807	8644.69	807	9435.58	807	11097.4	807	11202.1	807	9310.3
808	13266.7	808	11371.4	808	8543	808	8415.87	808	8950.31	808	8423.96	808	11199.9	808	9888.52
809	12091.5	809	10156.7	809	9022.79	809	8903.92	809	8408.95	809	8775.15	809	11218.2	809	9130.64
810	12009.5	810	9873.83	810	8585.2	810	8127.1	810	8784.42	810	10009.6	810	10022.7	810	8500.51
811	13704.6	811	12003.8	811	10124.6	811	10019.3	811	9489.91	811	9932.83	811	11419.6	811	9951.9
812	13545.8	812	12458	812	10179.4	812	10485	812	9920.27	812	9121.83	812	10702.8	812	9377.03
813	14272.9	813	12684.7	813	9373.83	813	8487.29	813	10070.3	813	9755.33	813	9515	813	8028.05
814	13237.2	814	12256.9	814	10143.8	814	10161.6	814	11289.4	814	10801.9	814	9343.17	814	8131.52
815	13023	815	12862.7	815	12041.9	815	10809.5	815	11272.7	815	11049.4	815	14802	815	13630.8
816	13715	816	13117.6	816	12043.1	816	11525.9	816	10817.4	816	11902.2	816	11797	816	11395.7
817	14828.4	817	12339.9	817	11758.5	817	10604.9	817	11983.6	817	13943.7	817	10782.3	817	10487.3
818	15337.3	818	11995	818	13387.3	818	11862.7	818	10860.7	818	12371.2	818	10678.8	818	8632.83
819	15666.1	819	13168.7	819	13560.4	819	12704.1	819	11007.8	819	11454.7	819	13760	819	11710.5
820	16729.1	820	14922.1	820	12304	820	11946.1	820	10561.2	820	11142.9	820	11931.5	820	10499.4
821	18572.9	821	16738.6	821	11798.5	821	11058.6	821	9067.96	821	9156.4	821	11866.2	821	10100.2
822	18956	822	17617.3	822	11122.5	822	10240.3	822	8396.67	822	8832.48	822	11325.7	822	10031.8
823	18767.5	823	17140.6	823	10548.7	823	10204.3	823	8270.86	823	8991.92	823	16521.1	823	14599.9
824	17831	824	16216.1	824	13062.6	824	12647.4	824	7503.68	824	8244.17	824	14471.4	824	13546.6
825	17324	825	16250.5	825	13640.2	825	13870.8	825	7395.13	825	6925.12	825	14612.9	825	14438.9
826	17195.7	826	16966.9	826	12874.8	826	13191	826	6696.2	826	5952.38	826	14296.5	826	15091.9
827	18198.8	827	16605	827	12449.6	827	14090.5	827	7479.43	827	6498.04	827	13773.7	827	14099
828	17449.4	828	16260.7	828	8996.96	828	9175.15	828	7488.11	828	5784.12	828	18427.9	828	18133.4
829	17316.9	829	14736.2	829	5696.54	829	6978.1	829	7579.84	829	6930.5	829	17828.3	829	15818.1
830	16950.2	830	15150.2	830	4673.35	830	5737.94	830	7902.35	830	7910.65	830	16416.4	830	12840.3
831	16873.4	831	16954.3	831	4118.84	831	4422.36	831	8387.6	831	8613.83	831	15066.6	831	11360.2
832	14806.6	832	14733.9	832	4641.48	832	4548.35	832	6950.67	832	6385.74	832	15377.4	832	11212.1
833	15696.7	833	13326.6	833	4732.7	833	5043.67	833	5784.09	833	5673.28	833	17214.2	833	14432.2
834	14756.1	834	10913.8	834	4598.49	834	4912.76	834	5426.55	834	5122.59	834	18277.7	834	15940.1
835	14151.7	835	11042.6	835	4815.55	835	5151.56	835	5640.97	835	5453.53	835	18452.5	835	15236.2
836	13482.6	836	11121.1	836	5283.95	836	5624.12	836	5987.2	836	5895.15	836	18337.4	836	14844.7
837	13339.4	837	10783.2	837	5134.24	837	5048.12	837	6155.02	837	6023.27	837	17875	837	14778
838	12047.9	838	10336.8	838	5556.99	838	4795.42	838	6483.44	838	5856.19	838	17787	838	15047.2
839	12087.3	839	10461.7	839	5857.89	839	5149.92	839	6528.61	839	5092.84	839	19395.9	839	16197.8
840	12734.5	840	10846.1	840	6394.35	840	6379.37	840	8072.97	840	6624.57	840	19750.5	840	16630.4
841	13223.7	841	11601.9	841	7182.56	841	7541.96	841	7812.77	841	6427.52	841	19367.6	841	15234.4
842	13753	842	12142.1	842	6777.66	842	7036.55	842	9338.95	842	7984.82	842	17789.2	842	12056.5
843	14771.9	843	13259.4	843	5152.39	843	5120.59	843	9710.33	843	9347.54	843	16583.6	843	11688.7
844	14659	844	12255.9	844	5802.2	844	4338.23	844	9271.8	844	8318.24	844	15158.1	844	10643.8
845	15077.6	845	12573.3	845	5369.69	845	4683.97	845	10022.8	845	9265.05	845	12709.1	845	8726.17
846	15951	846	13362.1	846	7203.84	846	6907.25	846	8918.93	846	8842.7	846	11376.1	846	7636.97
847	19098.1	847	14979.4	847	7288.16	847	6620.99	847	9266.61	847	9652.93	847	9710.6	847	6743.77
848	17820.8	848	13387.2	848	7345.85	848	6075.61	848	7783.07	848	7751.67	848	8574.92	848	6392.36
849	15726.3	849	12289.3	849	7657.54	849	6134.99	849	8732.55	849	7478.58	849	7301.32	849	6778.81
850	15566	850	12534.8	850	6975.71	850	5794.7	850	7876.53	850	9020.98	850	7038.33	850	6668.81
851	12383.3	851	9326.33	851	6116.9	851	5945.03	851	7850.49	851	8844.62	851	6334.7	851	5517.57
852	15010.4	852	11993.4	852	6159.96	852	5982.81	852	7560.2	852	7599.03	852	5778.99	852	6059.94
853	17574.1	853	15786.6	853	6966.55	853	7084.69	853	8077.23	853	7636.22	853	5807.65	853	5585.04
854	17314.7	854	16717.3	854	8060.47	854	9003.72	854	7639.33	854	6975.27	854	4596.93	854	5099.54
855	15055.6	855	14814.3	855	8717.44	855	10138.3	855	6920.66	855	5616.13	855	5728.81	855	5868.32
856	13534.5	856	12758.2	856	8970.17	856	10009.5	856	8656.37	856	7820.21	856	5791.93	856	6200.67
857	13481.3	857	11959.8	857	8619.21	857	9196.69	857	9137.74	857	8618.36	857	7227.01	857	6412.91
858	14510.3	858	12886.5	858	8065.5	858	8536.93	858	7251.09	858	7921.1	858	7389.01	858	6635.48
859	13305.7	859	12497.2	859	6773.42	859	10384.5	859	6847.36	859	7792.26	859	6487.57	859	6186.15
860	11755.5	860	11604.3	860	6449.71	860	9113.55	860	7658.14	860	8495.54	860	6567.13	860	6764.01
861	12381.4	861	11389.3	861	4481.52	861	6412.25	861	7450.81	861	7888.81	861	9618.63	861	8827
862	14798.8	862	12771.4	862	3949.18	862	5731.04	862	7937.37	862	7145.18	862	11059.8	862	10579.2
863	17603.8	863	14943.6	863	3588.34	863	5333.95	863	7524.78	863	7358.21	863	9221.99	863	8100.6
864	18555.6	864	15963.8	864	3496.53	864	4536.56	864	7483.27	864	7338.03	864	9715.22	864	9532.88
865	20049.7	865	16792.5	865	5848.25	865	6249.67	865	7903.13	865	8625.39	865	10522.6	865	9795.81
866	17910.3	866	14515.9	866	5344.81	866	5055.38	866	8038.46	866	8249.95	866	11062.9	866	9553.77
867	15300.7	867	14357.7	867	4273.7	867	4647.99	867	8278.62	867	8337.69	867	11032.1	867	9404.43
868	13130.3	868	11900.5	868	3507.67	868	4227.02	868	8808.33	868	8297.85	868	11818.1	868	9417.17
869	10502.4	869	8164.08	869	4595.05	869	5199.77	869	9082.91	869	8435.52	869	11773.6	869	9479.01
870	8540	870	6346.68	870	5816.35	870	5537.64	870	9332.09	870	8915.71	870	11513	870	11060.7
871	7571.15	871	6463.94	871	6112.26	871	6087.89	871	9626.36	871	9777.14	871	12027.6	871	10761.8
872	7311.57	872	6321.22	872	5704.08	872	5961.84	872	9875.99	872	9262.65	872	12355.8	872	9662.12
873	8051.21	873	6151.88	873	6336.07	873	7099.57	873	10729	873	9187.3	873	12497.7	873	9090.14
874	9036.68	874	6792.73	874	6461.51	874	7672.94	874	12500.4	874	11814	874	12406.9	874	9000.34
875	9674.03	875	8079.79	875	5893.27	875	6501.24	875	13771.3	875	11682.1	875	11592.4	875	8127.86
876	10317.5	876	8685.1	876	6325.87	876	7179.24	876	14073	876	12257.5	876	10470.8	876	7436.23
877	13271.6	877	8999.91	877	6539.53	877	7221.77	877	14146.2	877	12414.3	877	10120.8	877	8136.06
878	19108.4	878	11941.7	878	6873.07	878	7364.4	878	13724.2	878	11612.5	878	9928.98	878	8082.75
879	22697.7	879	15088	879	7643.82	879	8149.52	879	13002.2	879	11408.5	879	10151	879	9186.06
880	23846.7	880	17383	880	8174.23	880	9009.09	880	13831.5	880	12186.8	880	9279.89	880	7774.27
881	21541.6	881	17937.6	881	7688.89	881	8097.49	881	13996.6	881	11666.5	881	8645.9	881	6637.78
882	22844.2	882	18173.6	882	5839.6	882	5611.22	882	13259.6	882	10625.2	882	8128.69	882	5170.42
883	24099.5	883	20989.2	883	4297.9	883	4749.44	883	12845.3	883	11346.3	883	9534.15	883	6608.73
884	25165	884	21629.9	884	3651.04	884	3732.45	884	13061.5	884	12480.9	884	8794.75	884	6432.02
885	25170.4	885	20174.7	885	4275.46	885	3814.28	885	13040.4	885	12409.9	885	9334	885	7313.43
886	21422.1	886	15459.7	886	4080.39	886	2802.12	886	12495.7	886	11238.1	886	9418.39	886	6955.24
887	20270.3	887	16134.4	887	5702.27	887	3890.43	887	12582.3	887	10736.9	887	9041.79	887	6683.13
888	17275.7	888	12612.8	888	6114.17	888	5134.56	888	11501.9	888	10528.7	888	8252.83	888	6602.31
889	13379.8	889	10765.7	889	5541.76	889	5355.59	889	10310.8	889	9215.11	889	8750.35	889	6682.91
890	13297.6	890	9929.81	890	5576.28	890	4567.93	890	10980.7	890	10469.3	890	9586.15	890	7067.2
891	10237.1	891	7437.19	891	6696.31	891	4095.75	891	11787.5	891	12050.6	891	9368.58	891	9004.65
892	7531.26	892	5357.38	892	6922.67	892	4517.55	892	11368.1	892	10748.1	892	9672.92	892	9169.15
893	5585.46	893	4165.77	893	7221.89	893	4232.33	893	10361	893	10792.9	893	11920.6	893	9430
894	4413.01	894	3946.51	894	6529.6	894	4315.07	894	11041.6	894	11211.1	894	11850.3	894	10386.7
895	4550.65	895	3793.77	895	5875.19	895	3851.51	895	10882.6	895	11373.6	895	12381.2	895	10572.8
896	6010.37	896	5194.53	896	6799.94	896	6077.86	896	10173.5	896	10861.7	896	11251.8	896	10507.6
897	9319.77	897	8600.22	897	6170.87	897	6967.16	897	9383.84	897	10654.7	897	10509	897	12013.4
898	12922.4	898	11608.3	898	5491.68	898	6776.34	898	10120	898	11344.6	898	9803.16	898	10774.3
899	9974.99	899	9412.9	899	4306.9	899	5832.18	899	9797.93	899	10884.7	899	6835.32	899	7599.38
900	9561.55	900	9062.19	900	5203.82	900	6894.83	900	12080.5	900	11409.9	900	5599.59	900	6203.67
901	9876.72	901	8646.75	901	6565.27	901	8083.25	901	13312.5	901	12909.1	901	4260.11	901	4525.66
902	7691.47	902	6410.72	902	6584.12	902	7511.96	902	14043.6	902	12870.7	902	3754.79	902	4078.75
903	6174.13	903	4816.94	903	6803.14	903	7461.77	903	13037.7	903	11433.4	903	3791.43	903	3939.16
904	6133.3	904	5153.54	904	7449.17	904	7794.88	904	12009	904	11242.7	904	4078.18	904	3628.58
905	6945.87	905	5674.24	905	9045.89	905	9017.59	905	12397.2	905	11503.6	905	3916.01	905	3715.86
906	7616.68	906	5190.41	906	11626.4	906	11208.7	906	12331.5	906	10365.7	906	4788.62	906	4248.24
907	7665.23	907	4824.2	907	14625.4	907	13684	907	12544.7	907	9587.97	907	5556.78	907	4227.6
908	6117.61	908	3994.06	908	16129.2	908	14720.7	908	13248.6	908	10946.1	908	6295.21	908	4227.9
909	4510.5	909	2862.67	909	14795.6	909	13373.9	909	14405.6	909	12996.7	909	7054.75	909	5502.69
910	4191.54	910	2219.15	910	11405.4	910	9708.64	910	14683.6	910	13326.7	910	7488.22	910	6090.98
911	5851.45	911	3399.87	911	10038.4	911	8301.03	911	14457.6	911	12701.7	911	8106.26	911	6510.42
912	5328.7	912	3515.87	912	9890.69	912	8693.03	912	14902.2	912	13273.1	912	8531.39	912	6121.64
913	8954.67	913	6006.31	913	10209.6	913	9474.39	913	15475.1	913	14231.6	913	10093.7	913	6244.7
914	9205.53	914	6455.9	914	10562.9	914	10982.5	914	13598.8	914	13484.5	914	11781.7	914	6287.4
915	12547.5	915	9255.8	915	9019.09	915	9653.77	915	13255	915	13269.2	915	15175	915	8369.88
916	16150.9	916	11301.3	916	6782.71	916	7570.61	916	12931.3	916	13644.6	916	15499.4	916	10335.5
917	13530.3	917	8859.43	917	7295.02	917	7985.77	917	12213	917	13453.7	917	17251.7	917	11343.7
918	14287.9	918	9084.48	918	7899.22	918	7816.98	918	12499.5	918	13744.4	918	15247.6	918	12934.3
919	11656.1	919	7219.13	919	8048.82	919	7596.34	919	11058.2	919	11771.1	919	16189.2	919	13277.8
920	10336.2	920	6409.3	920	8783.93	920	8312.72	920	10425.7	920	9545.1	920	14835.3	920	13350.1
921	13733.5	921	11077.1	921	9098.23	921	9203.55	921	9877.77	921	7568.12	921	14795.7	921	13807.3
922	13316	922	11289.6	922	8354.23	922	9440.12	922	7914.27	922	6579.85	922	13787.2	922	13785.5
923	12302.6	923	11690.6	923	9427.76	923	9845.59	923	6843.12	923	5623.29	923	14100.9	923	13503.9
924	9541	924	8767.01	924	9855.1	924	9433.19	924	5411.96	924	5678.56	924	13663.9	924	12339.3
925	8966.8	925	8128.94	925	9392.28	925	9735.72	925	5353.72	925	5698.43	925	12741.9	925	10178.6
926	9597.86	926	8127.91	926	10189.8	926	10075.8	926	6257.77	926	7086.29	926	10897	926	8404.69
927	10559.4	927	7706.42	927	10886.3	927	11011.7	927	4992.95	927	5823.94	927	10570.1	927	8945.88
928	12132.6	928	8638.57	928	8569.41	928	9210.54	928	5186.9	928	4420.55	928	9497.91	928	7815.33
929	11396.9	929	8210.7	929	9727.45	929	10282.2	929	6238.57	929	3928.21	929	7030.48	929	5359.41
930	14617.4	930	9704.02	930	10885.7	930	12053.4	930	7216.03	930	4811.36	930	5385.65	930	4579.27
931	18799.9	931	14916.9	931	8956.07	931	10196.9	931	7328.17	931	5895.55	931	3830.84	931	3285.77
932	18694.5	932	15663	932	11444.8	932	12995	932	6015.36	932	4022.24	932	2926.68	932	3155.71
933	18853.2	933	15033.5	933	8382.94	933	9792.36	933	5810.85	933	4268.19	933	4212.44	933	3253.03
934	18981.5	934	15467	934	6075.09	934	7177.01	934	6366.48	934	4909.02	934	5377.35	934	4147.06
935	17645	935	15949.6	935	5166.23	935	6052.55	935	6146.25	935	5606.8	935	5734.1	935	4273.99
936	18808.5	936	17358.1	936	4755.92	936	5306.34	936	6513.23	936	7039.67	936	6129.21	936	4917.68
937	19433.2	937	16896.7	937	4805.3	937	4696.87	937	6107.84	937	5264.77	937	6785.77	937	5894.38
938	16976.6	938	14052.5	938	5689.17	938	5294.37	938	6708.23	938	6666.84	938	7638.57	938	6898.51
939	17425.6	939	12298.8	939	6172.43	939	4942.07	939	6811.95	939	6296.74	939	8319.51	939	7354.71
940	15508	940	9745.81	940	8073.73	940	5995.99	940	6034.1	940	4246.83	940	8312.3	940	7426.78
941	13061.6	941	8899.18	941	7544.96	941	6416.86	941	6976.25	941	5536.05	941	7859.88	941	7070.88
942	16575.7	942	13249.4	942	7601.88	942	5994.45	942	7136.67	942	6200.95	942	7039.35	942	5883.19
943	14751	943	12179.4	943	9436.35	943	8559.27	943	7191.75	943	6826.85	943	6517.31	943	5282.23
944	12627	944	9463.37	944	9645.18	944	9375.12	944	7792.42	944	7791.88	944	5198.89	944	4417.61
945	13294.5	945	8813.25	945	9639.82	945	9679.26	945	7285.42	945	5885.54	945	4736.61	945	4676.77
946	15111.7	946	10820.8	946	8269.59	946	9221.31	946	7615.74	946	6632.81	946	4783.23	946	4456.44
947	14101.1	947	10210.2	947	9613.63	947	9583.22	947	8700.79	947	7433.52	947	5027.26	947	4974.11
948	16239	948	12466.9	948	7182.87	948	7562.06	948	10114.5	948	8360.42	948	5625.88	948	4487.39
949	16335.1	949	11703.2	949	6197.68	949	6662.77	949	10248	949	9123.66	949	6611.22	949	5059.39
950	18006.3	950	13123.5	950	6756.72	950	6433.95	950	10570.5	950	9141.97	950	7923.76	950	6054.7
951	16155.5	951	11590	951	6685.65	951	6197.33	951	11096.8	951	9850.63	951	9890.37	951	7799.27
952	11754.2	952	7565.67	952	7405.21	952	6812.42	952	10953.8	952	9521.47	952	11643	952	9004.58
953	16698.3	953	10136.6	953	7681.01	953	6874.6	953	10443.5	953	9167.13	953	12500	953	9020.91
954	13632.9	954	7516.83	954	7591.47	954	6103.17	954	9545.08	954	8574.85	954	12049.5	954	9332.4
955	8116.21	955	3367.36	955	7757.71	955	6584.97	955	8188.46	955	7706.12	955	11537	955	9953.35
956	16158	956	9025.17	956	7629.62	956	7218.3	956	7008.49	956	8707.25	956	10374.9	956	8114.13
957	11559.1	957	6076.99	957	7346.59	957	6676.54	957	6856.19	957	8333.85	957	9496.69	957	6944.49
958	17553.6	958	13054.4	958	7553.45	958	6589.7	958	6089.69	958	7824.42	958	9771.05	958	6810.85
959	13151.5	959	9081.01	959	7051.41	959	5839.09	959	5104.78	959	7219.41	959	9307.25	959	7280.86
960	10722.8	960	8119.74	960	6769	960	6594.18	960	4179.27	960	5466.29	960	8048.08	960	7119.73
961	11596.7	961	9537.06	961	6497.19	961	6629.46	961	4185.23	961	4499.59	961	8536.15	961	7778.34
962	11671.8	962	9975.41	962	5724.64	962	5358.45	962	4581.13	962	4934.42	962	8190.53	962	9047.82
963	15809	963	13028.7	963	3414.26	963	3007.01	963	5655	963	5030.19	963	5874.85	963	6626.11
964	14197.3	964	11338.5	964	2237.93	964	1692.08	964	6838.66	964	6954.64	964	6015.58	964	6348.56
965	14006.4	965	10145.4	965	2104.26	965	1726.36	965	6190.9	965	6513.13	965	9116.6	965	9196.13
966	12151.6	966	7247.25	966	2221.16	966	1864.45	966	5473.44	966	6211.5	966	11866.9	966	10901.4
967	10648.5	967	6385.78	967	3056.32	967	2830.86	967	5851.24	967	6409.41	967	13033.9	967	12051.4
968	12349.2	968	7682.17	968	3377.43	968	3017.2	968	6840.05	968	6840.2	968	11902.7	968	10385.6
969	14718.2	969	12432.6	969	3982.12	969	3896.82	969	7868.1	969	7996.02	969	10817.8	969	8785.27
970	13321.8	970	10294.4	970	4964.15	970	4490.08	970	8768.74	970	8609.24	970	10726.3	970	8207.34
971	11642.3	971	8325.22	971	5786.46	971	4860.68	971	9387.02	971	8154.41	971	10245.6	971	8146.89
972	14769.9	972	12299.7	972	6396.03	972	4872.88	972	10457.7	972	9353.92	972	10445.5	972	7971.87
973	13894.6	973	10656.5	973	6598.94	973	4909.4	973	10992.4	973	10375.4	973	11045.7	973	8293.43
974	16801.6	974	13854.7	974	7133.22	974	5301.21	974	11160.5	974	11928.3	974	11703.4	974	8667.67
975	16719.1	975	13917.7	975	7515.57	975	5616.55	975	10790.5	975	11924.5	975	12286.1	975	8852.96
976	15800.1	976	11804.9	976	8726.7	976	7314.78	976	10059.2	976	10505.1	976	13144.5	976	9562.53
977	16127.7	977	11176	977	8859.55	977	7730.36	977	10480.4	977	10508.8	977	12068.7	977	8079.41
978	14804.6	978	11290.9	978	8434.55	978	7374.34	978	8536.08	978	9588.35	978	11595.4	978	8636.06
979	12037	979	9622.42	979	8982.51	979	8321.75	979	7134.09	979	7672.23	979	11012.4	979	9314.42
980	12293.8	980	9939.6	980	9982.03	980	10236.7	980	7153	980	8032.54	980	11159.3	980	8681.8
981	9359	981	7279.21	981	10261.3	981	10719.9	981	6869.06	981	6136.71	981	11013.4	981	6843.44
982	8236.66	982	5888.52	982	10386	982	10826	982	7087.12	982	7651.85	982	10880.7	982	6759.82
983	7996.9	983	7414.51	983	10037.2	983	10198.2	983	7159.84	983	7398.77	983	8743.22	983	5236.52
984	8150.27	984	7464.6	984	8691.1	984	8585.03	984	5715.52	984	4958.73	984	8700.63	984	5442.44
985	9275.37	985	8701.73	985	7904.67	985	7492.42	985	4304.8	985	3609.05	985	7560.08	985	5387.48
986	8477.46	986	8476.09	986	8399.16	986	7959.52	986	4007.94	986	3919.97	986	8072.53	986	5049.29
987	7675.87	987	8715.85	987	8246.04	987	8254.15	987	3853.67	987	3330.07	987	5510.6	987	3053.21
988	5837.95	988	6509.61	988	7943.88	988	8504.44	988	3208.27	988	4366.97	988	6339.4	988	4479.44
989	4585.48	989	4883.23	989	6873.87	989	7837.44	989	4303.84	989	5633.69	989	6397.39	989	4535.56
990	3015.2	990	2996.04	990	6844.34	990	7777.81	990	3927.33	990	4721.84	990	6817.93	990	5112.06
991	5027.89	991	3758.38	991	6141.21	991	6828.03	991	4260.41	991	5713.54	991	5471.51	991	5123.24
992	4422.49	992	3528.01	992	6137.81	992	6410.99	992	3865.68	992	5328.83	992	4799.88	992	4623.41
993	4294.46	993	3090.14	993	5682.07	993	5756.95	993	4749.02	993	6087.09	993	5143.34	993	5039.82
994	8308.1	994	5738.26	994	6101.57	994	5660.26	994	4010.5	994	4394.38	994	5089.25	994	4247.52
995	7140.84	995	4584.69	995	6874.89	995	5565.55	995	5191.84	995	4157.74	995	4518.4	995	4228.08
996	6703.24	996	3866.75	996	7445.15	996	6134.23	996	5596.21	996	3434.4	996	3427.41	996	3664.43
997	4170.9	997	1380.97	997	8996.73	997	7482.02	997	7323.73	997	3714.01	997	3572.98	997	3650.26
998	3862.08	998	1332.4	998	8610.83	998	6789.27	998	10003.9	998	7336.07	998	2933.21	998	3035.78
999	3310.35	999	1276.42	999	9030.42	999	7452.14	999	10637	999	8777.7	999	2484.73	999	3244.1
1000	4833.45	1000	2640.46	1000	8159.82	1000	7081.27	1000	10892.2	1000	9920.48	1000	5906.73	1000	6927.36
1001	4683.79	1001	3114.46	1001	6405.72	1001	6099.36	1001	9958.61	1001	10260.1	1001	5127.13	1001	6424.38
1002	7078.51	1002	5730.48	1002	5461.45	1002	5425.13	1002	9213.06	1002	9151.58	1002	7045.48	1002	6129.41
1003	6331.18	1003	5404.9	1003	5740.65	1003	4726.41	1003	8467.29	1003	8258.04	1003	6107.36	1003	4611.99
1004	6057.81	1004	5991.95	1004	5504.14	1004	5333	1004	7478.04	1004	7665.61	1004	6914.08	1004	6461.73
1005	5694.12	1005	5126.32	1005	6329.35	1005	6137.53	1005	6968.77	1005	7115.94	1005	6478.56	1005	5900.6
1006	5141.79	1006	4651.83	1006	6859.54	1006	6327.56	1006	6638.83	1006	7035.77	1006	6251.5	1006	5001.05
1007	6144.23	1007	4883.63	1007	6667.16	1007	5912.31	1007	7423.47	1007	7720.61	1007	6354.06	1007	5929.65
1008	7763.7	1008	6138.36	1008	6290.5	1008	6111.86	1008	6905.13	1008	7318.51	1008	7761.14	1008	6588.98
1009	9603.17	1009	7557.09	1009	6190.85	1009	6145.9	1009	7142.99	1009	8985.33	1009	10877.5	1009	7306.07
1010	9204.1	1010	6860.38	1010	6187.44	1010	5772.54	1010	6948.52	1010	8398.41	1010	11493.8	1010	6469.34
1011	7496.96	1011	6037.26	1011	6906.02	1011	5910.19	1011	5655.86	1011	5766.83	1011	10630.3	1011	6214.3
1012	9244.88	1012	6856.21	1012	7335.9	1012	6469.03	1012	5711.42	1012	6657.74	1012	10071.8	1012	5786.18
1013	10202.5	1013	6973.15	1013	7157.58	1013	6881.02	1013	4508.82	1013	5295.3	1013	10503.7	1013	6713.45
1014	10581.4	1014	6696.21	1014	7301.38	1014	6601.26	1014	4523.42	1014	4024.64	1014	10130.1	1014	6174.19
1015	11349.4	1015	6904.57	1015	7745.57	1015	7007.41	1015	5092.28	1015	3552.65	1015	9781.75	1015	6434.25
1016	11915.6	1016	7731.19	1016	7758.6	1016	7479.07	1016	6529.73	1016	3711.81	1016	9936.05	1016	7541.53
1017	11530.8	1017	8241.5	1017	6867.36	1017	6917.15	1017	8519.86	1017	5100.21	1017	10511	1017	9467.41
1018	11384.9	1018	7386.2	1018	6495.83	1018	6061.86	1018	9260.49	1018	4601.9	1018	10818.9	1018	9389.85
1019	12343	1019	9194.08	1019	6751.59	1019	6273.06	1019	9318.81	1019	3947.71	1019	11751.2	1019	11059.4
1020	12370.8	1020	10624.1	1020	7398.22	1020	6749.71	1020	11953.8	1020	5709.75	1020	11112	1020	11653.1
1021	12748.7	1021	9716.7	1021	7776.61	1021	6759.12	1021	14663.5	1021	10086.4	1021	11678.4	1021	12656.5
1022	12896.9	1022	9300.56	1022	8134.32	1022	7060.68	1022	12248.1	1022	10444.9	1022	11122	1022	7564
1023	13825.4	1023	9641.2	1023	9072.19	1023	7300.83	1023	10352.6	1023	9074.08	1023	10520.5	1023	7880.12
1024	13425.6	1024	9986.8	1024	9939.61	1024	7327.07	1024	11150.4	1024	10176.3	1024	9223.04	1024	6634.64
1025	13777.3	1025	10288.4	1025	12065.2	1025	9304.83	1025	9629.52	1025	6843.15	1025	8608.53	1025	5957.5
1026	11034.7	1026	8461.77	1026	13587.7	1026	11223.3	1026	9670.33	1026	5154.78	1026	8999.31	1026	6413.54
1027	8023.65	1027	6529.51	1027	12954.2	1027	11739.6	1027	10795.1	1027	5674.99	1027	8994.95	1027	8325.08
1028	6983.18	1028	5232.22	1028	14182.7	1028	11446.2	1028	12816	1028	9003.33	1028	8665.13	1028	7746.78
1029	6442.63	1029	5527.31	1029	14843.3	1029	12270.5	1029	14117.8	1029	11490.5	1029	8091.01	1029	6806.11
1030	6886.83	1030	6687.11	1030	15019.2	1030	11540.7	1030	16151.8	1030	12424	1030	8403.42	1030	6968.52
1031	10263.2	1031	9421.19	1031	14758.9	1031	11613.5	1031	18719.7	1031	12975.8	1031	7648.65	1031	6463.97
1032	12562.8	1032	10537.2	1032	14838.6	1032	12471.7	1032	23515.1	1032	15376.4	1032	7224.71	1032	6251.53
1033	13413	1033	10238.9	1033	12380.9	1033	11871.8	1033	22572.4	1033	16215.8	1033	6416.3	1033	3969.03
1034	14045.8	1034	9916.99	1034	9826.53	1034	10643.2	1034	20975	1034	17073.5	1034	6000.39	1034	5170.4
1035	19027.1	1035	13163.3	1035	8375.59	1035	7200.74	1035	18012.7	1035	14781	1035	6086.87	1035	5044.58
1036	15404.6	1036	10220.1	1036	8558.39	1036	6904.61	1036	17526.2	1036	15802.1	1036	7328.86	1036	5697.03
1037	14718.9	1037	9751.27	1037	7136.18	1037	5389.31	1037	15836.5	1037	14801.7	1037	9645.23	1037	8576.17
1038	11749.2	1038	7790.73	1038	6975.07	1038	5387.13	1038	18989.7	1038	18433.5	1038	10984.2	1038	10466.1
1039	8439.04	1039	4437.55	1039	9172.93	1039	6699.16	1039	16935.6	1039	16514.7	1039	10842.6	1039	9386.28
1040	10224	1040	6765.49	1040	11188.8	1040	8248.12	1040	16481.1	1040	18302.6	1040	13706	1040	13168.2
1041	7928.34	1041	4919.6	1041	9875.38	1041	7202.71	1041	16793.7	1041	18956.4	1041	13290.3	1041	12128.1
1042	8747.27	1042	6225.73	1042	12954.3	1042	9931.18	1042	15496.9	1042	16818.7	1042	11718.4	1042	11856.6
1043	8092.92	1043	4406.32	1043	14267.8	1043	11963.9	1043	14641.8	1043	15816.7	1043	11898.7	1043	11013.8
1044	7030	1044	4475.12	1044	15306.1	1044	13157.9	1044	14680.6	1044	13834.3	1044	11374.4	1044	9302.9
1045	9964.86	1045	6107.16	1045	14793.9	1045	13427.5	1045	14631.6	1045	17061.5	1045	12271	1045	12279.7
1046	11693.3	1046	9914.43	1046	13050	1046	11392.3	1046	13624.9	1046	17278.5	1046	11363.9	1046	10045.9
1047	9327.03	1047	7644.53	1047	11974.2	1047	9799.52	1047	13070.6	1047	14802.1	1047	11809.9	1047	9755.99
1048	8719.85	1048	7226.35	1048	11869.9	1048	10909.5	1048	13453.7	1048	11752.6	1048	11959.1	1048	11236
1049	10010.4	1049	8094.56	1049	11368.6	1049	10786.7	1049	14415.2	1049	12999.7	1049	11977.3	1049	11164.1
1050	9095.58	1050	6903.95	1050	11822.7	1050	11675.9	1050	14369.5	1050	14174.4	1050	11313.5	1050	9686.48
1051	9201.07	1051	5576.4	1051	8859.57	1051	8406.42	1051	13664.2	1051	14026.4	1051	11213.8	1051	9502.33
1052	10282.9	1052	7210.45	1052	8891.53	1052	8469.17	1052	15513.2	1052	15909.1	1052	11389.4	1052	8517.86
1053	12454	1053	10195.7	1053	12975.3	1053	12386.4	1053	17338.1	1053	16617.7	1053	10872.3	1053	8704.08
1054	11715.7	1054	8818.96	1054	11225.9	1054	10370.6	1054	17229.7	1054	15708.1	1054	10243.4	1054	7608.42
1055	12694.3	1055	9473.77	1055	12113.5	1055	11174.1	1055	15036.8	1055	15763.3	1055	9262.07	1055	6083.06
1056	11429.4	1056	7106.44	1056	14206.9	1056	11905.6	1056	16038.9	1056	17278.4	1056	10428.2	1056	8151.04
1057	8154.26	1057	4451.57	1057	13574.7	1057	10671.1	1057	14731.8	1057	15091.1	1057	8524.54	1057	6174.2
1058	11895.4	1058	7429.11	1058	11968.3	1058	8836.04	1058	12069.6	1058	11094.6	1058	7898.58	1058	5669.73
1059	11814	1059	8685.12	1059	11061.7	1059	8941.01	1059	11942.9	1059	11098.1	1059	8460.81	1059	6914.45
1060	12117	1060	9174.51	1060	11771.8	1060	9382.87	1060	14250.5	1060	13966.3	1060	7721.36	1060	6636.73
1061	10912.2	1061	7751.68	1061	13551.6	1061	10815.6	1061	17936.7	1061	18857.7	1061	7278.65	1061	6758.41
1062	13481.6	1062	10648.4	1062	13614.7	1062	12287.1	1062	17693.9	1062	18712.4	1062	7115.33	1062	7367.72
1063	14815.6	1063	13269.8	1063	13821.1	1063	11920.7	1063	18965.9	1063	20822.4	1063	7534.24	1063	7590.24
1064	15695.8	1064	12954.2	1064	10087.5	1064	9290.92	1064	23074.8	1064	25143.1	1064	6755.24	1064	6968.74
1065	17154.9	1065	14308.5	1065	13042.5	1065	11998.4	1065	21048.7	1065	24541	1065	8729.9	1065	8427.92
1066	15981.7	1066	14482.3	1066	13937.9	1066	11387	1066	18635.9	1066	24261.1	1066	10136.7	1066	10008
1067	13890.4	1067	11242.5	1067	13991.1	1067	12546	1067	21944.6	1067	28179.1	1067	11180.8	1067	10251.5
1068	13434.8	1068	11791.7	1068	13542.4	1068	10690.7	1068	27050.3	1068	29502.8	1068	12493.5	1068	9817.46
1069	10905	1069	11648	1069	13617.8	1069	12540.8	1069	23032.6	1069	26027.2	1069	12523.5	1069	10327
1070	8680.73	1070	10250.9	1070	12174.4	1070	11071.2	1070	28528.8	1070	29855.8	1070	13400	1070	11539
1071	9088.59	1071	9229.39	1071	12525.5	1071	11783.4	1071	22434.6	1071	26851.6	1071	12622.9	1071	10777
1072	7971.09	1072	7687.26	1072	12163.2	1072	10654.5	1072	21180.9	1072	26197.3	1072	10346.1	1072	8722.39
1073	8827.29	1073	6928.47	1073	12015.9	1073	9164.02	1073	22023.1	1073	27290.2	1073	11845.6	1073	10153.2
1074	8493.92	1074	6851.17	1074	12832	1074	10351.1	1074	28516.1	1074	33817.4	1074	11793.4	1074	10358.4
1075	8580.7	1075	7912.13	1075	13203.8	1075	10621.7	1075	24988.2	1075	31079.7	1075	12281.9	1075	10027.2
1076	10700.9	1076	9062.13	1076	10343.5	1076	9246.13	1076	27057	1076	32045.9	1076	12451	1076	10551.9
1077	10939.2	1077	8453.83	1077	7646.53	1077	8537.62	1077	31197.1	1077	32549.7	1077	12633.6	1077	10127.5
1078	11393.3	1078	9254.58	1078	10829.4	1078	11814.1	1078	29758.6	1078	30981.1	1078	13780.2	1078	11005.3
1079	14001.3	1079	11201.7	1079	9534.18	1079	10575	1079	30034.9	1079	29374.9	1079	13107.9	1079	10425.8
1080	14551.2	1080	10524.3	1080	11692.1	1080	14194.6	1080	28268.6	1080	29189.4	1080	13837.8	1080	10792.8
1081	11315.2	1081	6560.32	1081	13840.9	1081	15392.3	1081	29140.4	1081	26657.1	1081	11889.9	1081	9626.31
1082	9944.07	1082	6373.26	1082	14014.3	1082	14998.4	1082	28155	1082	26283.2	1082	12206.3	1082	9783.02
1083	11144.5	1083	8968.14	1083	13064.7	1083	10864.2	1083	26190.8	1083	24381.7	1083	11571.8	1083	12087.7
1084	14635.4	1084	13855.2	1084	12838.1	1084	11213.8	1084	23546.2	1084	20223	1084	11636.1	1084	11492.9
1085	16857.4	1085	15104.3	1085	9651.19	1085	7906.65	1085	24450.7	1085	22897.1	1085	11664	1085	10081.8
1086	16634.5	1086	16385	1086	8843.4	1086	7771.68	1086	23436.4	1086	23895.4	1086	12346.9	1086	13109.9
1087	12799.1	1087	11884.2	1087	8595.67	1087	9183.75	1087	23766.3	1087	20845.9	1087	13939.5	1087	13666.1
1088	12001.7	1088	9488.66	1088	7844.14	1088	8174.23	1088	23228.3	1088	19767.1	1088	15418.9	1088	14132.9
1089	13730.2	1089	12047.5	1089	9485.87	1089	9826.18	1089	23191.7	1089	20571.5	1089	15724.5	1089	15093
1090	14404.5	1090	12739.9	1090	10947.8	1090	10599	1090	22115	1090	17646.6	1090	15780.8	1090	15612.2
1091	10308.5	1091	9811.14	1091	10545.4	1091	10720.1	1091	21314.2	1091	16644.7	1091	14429.8	1091	14923.2
1092	9504.08	1092	9294.15	1092	10223.5	1092	9945.85	1092	18661.1	1092	15072.2	1092	12637.4	1092	12791.2
1093	10287.8	1093	8259.52	1093	11828.1	1093	11131.3	1093	20912.1	1093	17758.2	1093	11321.2	1093	11481.3
1094	10618.9	1094	8917.8	1094	12129.9	1094	11560.7	1094	19565.5	1094	17153.2	1094	9765.86	1094	10051.9
1095	11534.8	1095	10023.7	1095	11509.4	1095	11225	1095	18364.5	1095	16627	1095	7445.69	1095	7481.64
1096	10504.5	1096	9988.9	1096	12262.1	1096	11484.2	1096	19137	1096	17313.6	1096	6746.77	1096	5995.63
1097	10701.8	1097	8894.64	1097	11555	1097	10672.3	1097	17886.7	1097	16564.1	1097	7805.38	1097	6603.83
1098	10951.8	1098	7701.19	1098	11578.9	1098	11828.9	1098	19135.2	1098	19541	1098	8691.82	1098	8531.6
1099	11563.5	1099	8973.77	1099	12274.7	1099	12677.3	1099	19639.7	1099	22078.6	1099	9864.78	1099	8328.33
1100	11488.1	1100	10649.2	1100	11847.7	1100	11574.4	1100	19790.5	1100	25149.3	1100	11010.4	1100	8427.74
1101	12178	1101	10578.4	1101	10656.3	1101	10375.8	1101	14814.4	1101	19143.7	1101	11205.4	1101	9179.58
1102	10140.7	1102	8514.93	1102	9724.75	1102	8767.19	1102	12060.6	1102	15099.3	1102	11611	1102	9470.78
1103	8195.01	1103	6710.1	1103	12563.7	1103	12406	1103	15653.5	1103	19003.6	1103	11952.5	1103	9878.7
1104	7285.16	1104	5246.1	1104	10093.2	1104	10274.3	1104	13475.5	1104	15997.6	1104	11169.4	1104	8809.18
1105	8295.87	1105	6238.45	1105	12766.5	1105	11629.2	1105	15300.7	1105	18241.2	1105	10719.4	1105	8170.76
1106	11218.3	1106	8940.87	1106	10949.9	1106	9515.17	1106	15180	1106	17484.6	1106	11026.8	1106	9319.09
1107	8754.74	1107	7154.19	1107	9442.98	1107	8108.19	1107	18634	1107	20349.9	1107	12149.1	1107	10281.7
1108	8650.23	1108	5436.12	1108	8004.65	1108	6928.94	1108	18275	1108	20454	1108	11360.3	1108	9267.1
1109	8041.56	1109	4453.29	1109	7260.58	1109	6180.72	1109	22130.1	1109	23357.2	1109	11430	1109	9366.78
1110	10707.4	1110	6830.02	1110	7310.03	1110	6432.67	1110	21064.3	1110	23997.6	1110	10525.3	1110	8260.24
1111	13659.7	1111	10254.1	1111	9766.58	1111	9927.76	1111	20473.8	1111	25198.6	1111	9182.66	1111	8042.63
1112	13470	1112	9177.27	1112	13400.6	1112	12220.8	1112	20486.1	1112	25586.5	1112	8828.05	1112	8567.94
1113	12423.3	1113	9104.3	1113	14644.6	1113	13707.5	1113	25005.3	1113	27952.1	1113	9114.99	1113	8839.38
1114	14816	1114	13533	1114	15138.4	1114	14330	1114	24353.8	1114	30162.5	1114	9463.15	1114	9568.31
1115	12125	1115	9983.59	1115	12038	1115	11156.7	1115	23838.5	1115	29924.4	1115	10220.1	1115	10977
1116	12677.9	1116	9708.69	1116	14274.4	1116	13432.3	1116	27562	1116	29292	1116	11180.3	1116	10673.7
1117	14672.1	1117	10976.1	1117	13807.3	1117	13967.6	1117	25091.1	1117	29394.5	1117	10604.5	1117	10486.7
1118	12261.3	1118	10928.3	1118	11960.5	1118	11971	1118	25938	1118	29161.8	1118	9798.76	1118	9654.55
1119	10015.3	1119	9408.99	1119	9125.67	1119	7523.43	1119	24465	1119	27024	1119	11764.8	1119	11270.7
1120	9775.37	1120	9389.83	1120	9402.98	1120	9698.64	1120	24592.9	1120	25567.6	1120	12321.3	1120	12401.1
1121	10887.2	1121	10324.8	1121	10905.8	1121	10066.8	1121	23755.9	1121	24869	1121	11165.7	1121	11177.3
1122	9956.35	1122	9920.54	1122	9811.45	1122	9451.23	1122	22693	1122	25576.8	1122	10896.7	1122	9416.55
1123	11751.2	1123	11419.3	1123	10196.2	1123	8578.2	1123	24088.5	1123	24936.8	1123	10533.8	1123	8522.38
1124	12720.9	1124	11796.1	1124	10123.3	1124	8263.96	1124	23798.1	1124	25653.3	1124	10397.2	1124	7565.96
1125	12255.7	1125	10249.6	1125	9919.03	1125	9135.89	1125	24072.5	1125	25404.6	1125	10233.9	1125	6580.52
1126	12216.5	1126	11768.9	1126	10205.5	1126	8346.16	1126	25277.5	1126	25626	1126	9762.59	1126	6777.31
1127	11025.3	1127	9899.3	1127	9869.35	1127	7211.09	1127	24719.9	1127	26121.3	1127	9404.02	1127	6896.24
1128	10418.1	1128	9291.66	1128	8713.34	1128	5970.3	1128	24553.8	1128	26409.2	1128	8887.7	1128	7209.71
1129	11321.3	1129	9364.08	1129	6692.22	1129	3876.5	1129	25690.5	1129	24689.8	1129	7995	1129	6673.74
1130	8921.63	1130	8165.55	1130	6041.43	1130	4651.68	1130	25255.4	1130	25828.8	1130	7413.58	1130	6247.21
1131	9182.09	1131	8926.46	1131	9003.99	1131	6539.97	1131	22603.1	1131	24925.7	1131	6964.44	1131	5925.87
1132	10091.9	1132	10171.8	1132	7663.44	1132	4989.48	1132	23796.3	1132	26665.9	1132	6833.66	1132	5146.66
1133	9003.6	1133	9496.59	1133	8817.17	1133	5600.95	1133	22576.5	1133	26774.8	1133	6534.02	1133	5659.06
1134	6998.52	1134	7726.38	1134	9533.97	1134	7298.83	1134	19128.8	1134	26235.1	1134	7249.19	1134	6161.81
1135	9756.37	1135	10183.8	1135	9150.44	1135	8306.29	1135	22816.2	1135	29666.7	1135	9453.83	1135	9195.4
1136	10185.4	1136	8797.17	1136	10365.4	1136	9286.97	1136	22797.5	1136	27052.5	1136	10775	1136	9880.17
1137	7527.54	1137	6405.6	1137	9018.94	1137	8612.39	1137	19072.3	1137	25070.3	1137	8513.71	1137	7828.51
1138	7544.61	1138	7057.73	1138	7796.91	1138	6801.45	1138	26921.5	1138	28277.3	1138	9958.67	1138	8643.44
1139	7429.9	1139	5978.83	1139	6008.34	1139	5725.06	1139	23866.4	1139	27435.3	1139	9221.08	1139	7542.72
1140	5955.65	1140	4548.89	1140	5079.57	1140	5669.39	1140	22931.5	1140	26369	1140	8214.61	1140	7209.1
1141	6732.73	1141	5989.04	1141	6096.94	1141	7330.82	1141	33458	1141	30296.2	1141	7408.5	1141	5471.13
1142	5665.35	1142	5226.14	1142	10226.6	1142	12247.7	1142	26763.9	1142	27289	1142	9095.46	1142	7793.24
1143	5567.48	1143	4229.31	1143	12420.1	1143	15352.5	1143	28148.4	1143	30650.1	1143	7902.16	1143	6975.2
1144	4779.51	1144	3384.31	1144	9951.34	1144	11432.1	1144	32396.8	1144	28336.7	1144	8474.41	1144	6491.15
1145	4025.78	1145	3499.45	1145	8758.49	1145	10890.2	1145	29934.2	1145	31305.4	1145	10006.5	1145	7420.16
1146	3427.52	1146	3418.52	1146	8621.19	1146	9377.84	1146	29363.8	1146	31113	1146	9993.42	1146	7413.6
1147	3685.59	1147	3334.28	1147	5730.67	1147	5911.86	1147	28777.2	1147	27321.1	1147	12796.8	1147	8779.34
1148	3901.97	1148	3552.66	1148	9895.09	1148	10756.3	1148	28074.9	1148	28233	1148	11928	1148	8233.21
1149	4803.46	1149	4390.37	1149	11530.3	1149	12151.3	1149	27596.3	1149	27881.6	1149	10777	1149	7113.44
1150	4955.8	1150	5296.45	1150	12217.8	1150	11579.3	1150	30646.8	1150	27580.9	1150	11641.7	1150	7489.43
1151	5827.8	1151	5948.73	1151	10933.8	1151	10126.9	1151	31683.5	1151	27890.9	1151	11463.1	1151	8137.02
1152	6918.43	1152	6720.98	1152	9729.27	1152	8838.35	1152	32131.2	1152	26045.7	1152	13061.1	1152	10566.8
1153	8311.61	1153	6648.59	1153	8058.86	1153	7120.51	1153	34408.2	1153	30978.4	1153	15712.8	1153	12307.6
1154	8524.56	1154	6220.08	1154	7566.45	1154	6650.37	1154	34643.6	1154	30907.2	1154	17573.6	1154	14941.2
1155	6548.66	1155	4445.32	1155	8789.84	1155	8222.21	1155	32753.9	1155	28269.9	1155	17207.7	1155	14330
1156	6890.28	1156	5476.96	1156	7218.42	1156	6972.38	1156	33085.7	1156	30848.3	1156	16576.4	1156	14556.4
1157	6659.91	1157	5434.13	1157	7364.38	1157	7200.75	1157	32122.6	1157	28390.1	1157	16214.9	1157	15515.1
1158	7497.03	1158	5393.37	1158	7876.03	1158	7798.86	1158	34516.4	1158	31751.9	1158	16828.6	1158	15072.2
1159	9858.29	1159	7900.51	1159	8015.44	1159	8840.54	1159	34983.3	1159	34273	1159	17066	1159	16579.2
1160	10553.4	1160	9871.42	1160	9526.1	1160	10587.5	1160	33984.3	1160	31230.8	1160	18185.9	1160	18067.5
1161	9824.74	1161	9808.22	1161	10799	1161	11529	1161	34136	1161	31711.1	1161	18512.5	1161	17812.5
1162	11106.2	1162	10901.1	1162	11729.2	1162	12484.2	1162	33496.4	1162	32472.3	1162	18507.5	1162	17351.7
1163	10443	1163	11514.1	1163	11956.8	1163	13682.6	1163	30989.7	1163	31028.3	1163	18902.5	1163	17163.4
1164	10722.8	1164	10685.1	1164	11880.8	1164	12634.2	1164	28989.9	1164	28570.8	1164	18274.1	1164	16137.1
1165	8784.09	1165	8901.19	1165	10132.5	1165	11251.7	1165	28689	1165	28299.1	1165	15039.3	1165	12789.8
1166	6979.54	1166	7254.29	1166	8746.4	1166	8912.16	1166	29778.9	1166	27216.1	1166	12988.5	1166	11045.3
1167	7387.84	1167	7392.33	1167	8154.33	1167	8174.07	1167	29817.4	1167	26042.6	1167	12271.1	1167	10132.4
1168	7567.82	1168	7603.99	1168	8676.4	1168	9020.75	1168	31844.3	1168	28270	1168	11002.1	1168	9470.17
1169	6489.89	1169	7604.35	1169	9374.65	1169	10442.7	1169	28606.2	1169	26293.2	1169	10308.6	1169	9125.92
1170	5187.46	1170	6430.12	1170	8535.34	1170	9546.54	1170	27233.3	1170	27465	1170	10105.6	1170	7983.08
1171	4441.95	1171	5503.2	1171	8684.2	1171	9388.69	1171	26394.3	1171	30327.3	1171	8322.94	1171	6939.83
1172	3648.51	1172	4842.22	1172	9042.67	1172	9917.6	1172	27265.9	1172	32014.8	1172	7144.16	1172	6416.83
1173	3547.83	1173	4171.62	1173	8944.18	1173	9863.03	1173	25865.7	1173	30179.9	1173	6074.11	1173	4137.67
1174	3302.18	1174	3851.78	1174	9795.79	1174	10859.6	1174	26154.9	1174	29915.3	1174	5341	1174	3724.66
1175	4172.94	1175	3782.67	1175	9875.81	1175	11614	1175	24839.3	1175	26437.3	1175	6266.54	1175	5422.5
1176	4656.29	1176	3724.46	1176	11200.6	1176	12198.1	1176	21563.4	1176	22268.6	1176	5991.89	1176	5332.53
1177	5808.84	1177	4438.47	1177	8753.4	1177	8931.26	1177	22637	1177	22739.5	1177	6176.12	1177	5858.36
1178	7513.28	1178	5591.95	1178	7463.48	1178	6863.11	1178	17351.9	1178	16531.5	1178	7578.88	1178	9373.74
1179	9346.12	1179	7246.48	1179	7010.28	1179	7260.01	1179	17026.3	1179	16019.9	1179	8019.17	1179	8762.13
1180	9899.26	1180	8038.57	1180	4767.85	1180	5639.41	1180	16949.2	1180	16381.1	1180	8707.87	1180	9387.13
1181	7794.67	1181	6611.35	1181	4360.57	1181	5000	1181	15133.1	1181	11827.7	1181	10166	1181	9625.83
1182	8936.77	1182	7113.55	1182	4027.22	1182	3935.98	1182	15170.3	1182	13203.3	1182	11350.5	1182	10246.1
1183	8165.69	1183	6585.79	1183	3654.7	1183	3533.88	1183	17498.3	1183	15572.8	1183	12884.5	1183	12765.9
1184	7832.22	1184	6063.48	1184	3455.46	1184	3148.46	1184	16111.3	1184	15889.3	1184	12893	1184	12704.4
1185	8350.47	1185	6046.71	1185	5119.8	1185	4056.38	1185	17694.5	1185	18199.7	1185	14977.3	1185	13888.8
1186	8672.35	1186	6533.64	1186	3832.45	1186	2740.36	1186	16727.4	1186	17642.5	1186	14633.7	1186	12625.7
1187	9720.93	1187	7190.77	1187	6014.09	1187	4078.08	1187	15173	1187	15795.5	1187	14508.7	1187	13025.9
1188	8648.95	1188	5088.73	1188	7691.7	1188	5320	1188	14273.8	1188	14358.4	1188	13868.2	1188	12465.4
1189	5646.84	1189	2822.13	1189	8592.15	1189	5535.15	1189	15143.5	1189	14568.8	1189	12926.7	1189	11263.8
1190	8302.06	1190	4987.4	1190	10131	1190	6726.16	1190	14848.3	1190	15142.5	1190	13627.1	1190	13186.3
1191	8511.91	1191	5436.65	1191	10516.3	1191	7576.71	1191	14400.5	1191	14307	1191	15099.9	1191	13547.4
1192	8101.72	1192	4485.27	1192	12434.4	1192	9874.23	1192	13221.6	1192	14410.7	1192	16886.6	1192	14341.2
1193	5191.62	1193	1997.65	1193	11205.5	1193	8104.46	1193	14863.5	1193	14386.1	1193	21123.7	1193	17968.9
1194	6606.56	1194	3073.11	1194	11295.8	1194	9044.26	1194	14454.5	1194	15528.3	1194	23355.2	1194	20673.5
1195	4969.2	1195	2525.48	1195	11695.3	1195	9963.2	1195	15022.9	1195	15704.7	1195	23235.3	1195	21312.8
1196	7494.69	1196	3965.89	1196	12851.4	1196	13272.3	1196	12640.7	1196	14829	1196	27277.7	1196	26003.9
1197	6089.18	1197	2942.55	1197	13422	1197	12612.5	1197	13796.7	1197	14208.1	1197	28534.5	1197	25179.2
1198	5015.54	1198	2907.07	1198	14429.3	1198	12761.7	1198	14854.5	1198	13554.9	1198	28601.5	1198	24550.1
1199	7609.75	1199	4165.75	1199	14254.6	1199	12769.4	1199	15185.7	1199	12857.4	1199	25984.6	1199	21433.1
1200	10300.6	1200	6747.23	1200	13099.1	1200	10907.9	1200	15093.8	1200	14406.5	1200	22700.3	1200	19708.4
1201	12049.5	1201	7929.66	1201	13348.7	1201	11312.2	1201	15617.3	1201	12829.1	1201	25283.2	1201	22509
1202	13337.9	1202	9371.35	1202	9512.13	1202	7277.48	1202	14898	1202	15279.9	1202	21145.7	1202	19052.3
1203	11623.6	1203	8695.18	1203	8539.86	1203	7410.02	1203	15595.2	1203	14748.3	1203	22539.9	1203	19803.7
1204	12342.1	1204	9646.78	1204	11182.5	1204	10144.2	1204	17257.1	1204	15105.1	1204	23204.7	1204	21871.4
1205	9552.99	1205	6782.29	1205	9968.51	1205	8591.41	1205	11723.5	1205	11693.5	1205	22048.3	1205	21801
1206	10744.7	1206	9121.54	1206	11987.7	1206	10005.3	1206	10668	1206	11314.8	1206	18058	1206	18346
1207	7586.11	1207	6218.39	1207	11699.1	1207	8980.01	1207	14133.5	1207	14604.3	1207	14553	1207	14104
1208	4816.12	1208	4854.05	1208	10558.5	1208	8254.49	1208	11111.3	1208	12442.1	1208	11703.8	1208	11778
1209	3534.25	1209	4113.8	1209	11822.7	1209	8838.6	1209	10901.6	1209	11776.9	1209	10442.3	1209	10712.2
1210	3918.48	1210	4474.43	1210	12375.7	1210	10749	1210	8229.28	1210	9839.81	1210	11052.3	1210	8810.84
1211	5178.31	1211	5188.26	1211	12322.3	1211	11398	1211	11251.7	1211	14259.4	1211	8996.48	1211	7933.79
1212	6619.07	1212	5701.83	1212	8686.93	1212	7015.65	1212	8435.64	1212	11980.3	1212	9036.9	1212	6279.29
1213	5926.57	1213	5227.54	1213	9573.07	1213	7548.54	1213	7722.23	1213	9133.15	1213	8773.86	1213	5078.44
1214	7668.71	1214	5832.28	1214	9757.93	1214	7047.5	1214	9550.92	1214	11823.2	1214	8082.63	1214	4790.89
1215	10430.7	1215	6940.55	1215	11808.4	1215	9081.06	1215	7982.22	1215	9697.04	1215	6611.94	1215	4279.57
1216	12661	1216	8497.14	1216	12473.6	1216	10439.6	1216	8014.71	1216	10750.5	1216	8312.85	1216	4172.34
1217	9894.29	1217	6656.77	1217	12212.1	1217	10231.3	1217	7354.86	1217	9474.84	1217	8877.82	1217	5752.4
1218	8728.15	1218	5703.93	1218	11993.4	1218	10325	1218	10051.7	1218	12805.7	1218	8595.94	1218	5815.38
1219	10886.8	1219	6472.2	1219	11159.8	1219	9766.06	1219	7465.39	1219	9524.34	1219	6144.4	1219	4828.28
1220	10704.8	1220	6590.45	1220	10833.1	1220	9654.7	1220	11833.6	1220	13813.8	1220	4984.57	1220	3750.32
1221	9968.26	1221	6274.9	1221	11042.7	1221	10594.9	1221	11208.2	1221	13983.5	1221	6825.96	1221	6074.69
1222	11408.7	1222	7108.67	1222	11333	1222	11129.8	1222	12949.3	1222	15293.3	1222	5416.26	1222	4745.29
1223	13398.7	1223	8803.58	1223	11050	1223	10218.8	1223	12843.9	1223	15036.3	1223	4533.11	1223	4056.9
1224	12165.1	1224	7886.44	1224	10636.7	1224	9308.97	1224	13583.6	1224	15239.6	1224	4880.24	1224	4802.29
1225	13264.8	1225	8702.59	1225	10830.5	1225	9338.14	1225	14364.8	1225	14102.6	1225	6480.67	1225	5342.1
1226	11678.3	1226	7268.38	1226	10793.7	1226	9971.53	1226	17007	1226	14914	1226	5699.88	1226	4957.71
1227	10598	1227	7257.64	1227	9536.56	1227	9279.94	1227	16595.9	1227	15172.6	1227	7628.08	1227	5635.06
1228	12772.6	1228	9599.61	1228	9168.21	1228	8836.12	1228	17878.4	1228	14876.5	1228	9781.56	1228	6330.6
1229	12696.9	1229	11025.7	1229	8216.39	1229	7439.12	1229	17528.3	1229	15003.7	1229	11828	1229	6943.7
1230	9578.73	1230	6015.61	1230	7812.95	1230	7365.55	1230	17901.9	1230	16512	1230	13195.3	1230	8014.17
1231	9200.28	1231	6059.17	1231	8239.58	1231	7118.08	1231	18952.7	1231	17084.4	1231	12292.6	1231	8012.05
1232	4237.5	1232	2346.44	1232	8153.28	1232	6873.49	1232	19539.8	1232	18116.8	1232	11026.6	1232	7465.44
1233	2756.61	1233	1075.56	1233	8052.97	1233	6286.35	1233	21350.8	1233	22590.5	1233	11506.1	1233	9337.66
1234	2371.13	1234	761.733	1234	7545.4	1234	6640.72	1234	23214.4	1234	24761.3	1234	11097.6	1234	8845.29
1235	3382.15	1235	1536.27	1235	6577.27	1235	6980.43	1235	25102.4	1235	25746.6	1235	9282.71	1235	6025.5
1236	1846.26	1236	719.68	1236	5709.35	1236	5785.75	1236	26271.8	1236	28297.2	1236	8687.62	1236	5692.87
1237	2060.6	1237	1064.35	1237	5164.23	1237	4465.33	1237	26777.8	1237	28456.3	1237	7754.86	1237	5575.86
1238	3081.69	1238	1421.74	1238	6644.97	1238	5112.43	1238	26670.8	1238	28025.2	1238	6313.6	1238	4912.3
1239	4358.8	1239	3654.7	1239	7121.95	1239	6194.99	1239	28657.7	1239	29299.8	1239	5908.25	1239	4212.03
1240	6784.77	1240	4039.71	1240	8545.72	1240	7035.64	1240	33513.7	1240	33939.1	1240	5086.05	1240	3591.02
1241	7758.14	1241	4655.04	1241	9587.41	1241	8272.14	1241	32702.8	1241	31650	1241	5831.43	1241	4096.2
1242	10240.4	1242	5494.52	1242	10322.2	1242	8813.24	1242	36935.8	1242	35170.1	1242	4920.32	1242	4206.95
1243	10295.8	1243	6446.44	1243	10693.9	1243	9107.82	1243	35796.4	1243	34320.3	1243	5672.59	1243	4249.3
1244	9308.28	1244	6783.3	1244	15666.8	1244	13434.1	1244	33793.4	1244	34474.3	1244	5496.48	1244	4342.88
1245	8186.75	1245	6300.27	1245	15767.8	1245	14583.3	1245	34546.3	1245	33988.5	1245	5188.1	1245	4826.14
1246	6854.14	1246	5087.81	1246	15326.6	1246	13797.3	1246	34401.6	1246	35289.1	1246	5192.73	1246	3958.69
1247	6760.95	1247	4897.24	1247	13151.2	1247	11359.2	1247	33020.1	1247	36799.1	1247	4890.72	1247	2780.76
1248	8575.93	1248	6920.33	1248	10875.3	1248	8927.38	1248	29956.8	1248	33424.9	1248	4576.48	1248	3585.37
1249	11719.4	1249	10637.8	1249	9418.53	1249	7332.21	1249	25013.6	1249	27635.2	1249	4595.66	1249	3643.71
1250	12887.6	1250	11605.1	1250	7435.22	1250	6082.11	1250	30188.9	1250	32651.1	1250	4935.36	1250	3267.75
1251	13217.8	1251	11787.3	1251	8179.21	1251	7064.97	1251	26657.1	1251	29032.2	1251	4588.94	1251	2989.6
1252	13840.2	1252	12735.2	1252	10953.3	1252	10658.5	1252	35730.8	1252	36837.2	1252	4014.01	1252	2233.59
1253	15208.4	1253	14545.1	1253	9519.39	1253	9254.53	1253	36090.1	1253	36674.7	1253	4534.95	1253	2067.43
1254	15795.4	1254	14809.1	1254	9387.15	1254	8127.79	1254	37229.2	1254	38539.9	1254	5157.33	1254	3300.48
1255	21117	1255	20411.2	1255	11007.4	1255	9054.24	1255	43471.9	1255	36082.1	1255	5110.06	1255	3381.04
1256	20965.5	1256	19005.2	1256	11303.1	1256	9835.26	1256	39751.6	1256	35381.6	1256	4888.47	1256	4151.68
1257	22722	1257	18595.3	1257	11119.3	1257	10571.4	1257	36904.5	1257	32919.7	1257	5380.98	1257	4238.34
1258	23012.9	1258	22190	1258	10774.4	1258	9866.39	1258	31570.8	1258	22752.9	1258	6718.53	1258	4841.74
1259	18276.4	1259	17497.3	1259	10541.5	1259	8746.09	1259	34847.4	1259	27894.8	1259	5423.68	1259	4261.75
1260	12731.1	1260	11048.3	1260	9051.24	1260	7389.88	1260	31148.9	1260	21453.5	1260	3821.34	1260	3919.8
1261	8948.74	1261	8612.57	1261	8250.9	1261	7069.11	1261	25410	1261	15967.6	1261	3718.94	1261	4661.21
1262	9098.16	1262	7380.78	1262	7231.66	1262	5986.49	1262	27251	1262	18392.6	1262	3578.07	1262	4839.11
1263	10837.2	1263	6742.93	1263	7920.14	1263	5276.22	1263	22730.9	1263	14098.2	1263	3617.02	1263	4329.3
1264	12764.5	1264	8444.05	1264	8353.93	1264	5625.67	1264	24231.1	1264	16179	1264	4754.68	1264	5247.72
1265	13958.5	1265	10428.4	1265	8545.45	1265	6109.07	1265	30053.3	1265	20582	1265	6505.89	1265	7141.08
1266	15309.1	1266	11102.2	1266	11213	1266	9928.6	1266	23067.6	1266	11388.1	1266	7596.5	1266	8183.38
1267	16200.7	1267	14247.5	1267	11847.8	1267	10367.8	1267	27271.7	1267	14628.1	1267	7224.33	1267	5118.49
1268	15619	1268	15755.3	1268	12145	1268	10699.4	1268	33326.7	1268	19091.7	1268	9183.75	1268	6717.3
1269	15552.7	1269	16033.3	1269	12193.6	1269	11517.4	1269	37066.1	1269	25329.2	1269	9000.78	1269	5870.91
1270	15147.3	1270	15308.2	1270	10968.1	1270	10844.9	1270	29094.3	1270	16268.3	1270	11004.5	1270	9535.53
1271	15418.3	1271	14124.4	1271	8249.02	1271	8582.06	1271	33983.9	1271	21810.6	1271	9233.94	1271	8859.1
1272	16285.8	1272	14388.3	1272	8353	1272	9003.74	1272	30298	1272	18644.4	1272	11717.9	1272	8425.37
1273	15737.6	1273	15361.6	1273	5099.43	1273	7235.79	1273	34436.2	1273	24269.9	1273	11266.5	1273	9797.81
1274	15621.7	1274	13422.9	1274	5127.35	1274	7052.28	1274	37619.6	1274	29323.6	1274	10154.8	1274	8404.83
1275	14266.9	1275	13183.8	1275	7162.96	1275	8366.79	1275	35311.9	1275	26698	1275	8628.75	1275	6734.68
1276	18614	1276	17982	1276	6988.98	1276	7375.23	1276	37151	1276	29151.4	1276	7414.02	1276	6384.96
1277	19780.6	1277	19644.2	1277	7080.1	1277	7038.65	1277	36824.6	1277	26169.5	1277	8184.31	1277	7223.45
1278	20911.5	1278	18643.2	1278	8705.81	1278	8717.74	1278	34219.6	1278	23833.1	1278	9383.97	1278	8233.35
1279	20211.8	1279	18053.3	1279	9424.69	1279	8571.45	1279	38655.8	1279	28294	1279	8940.16	1279	8444.15
1280	21194.6	1280	17823.8	1280	8369.15	1280	6956.63	1280	39777.3	1280	32633.2	1280	7766.38	1280	7627.39
1281	20571.5	1281	15585.5	1281	8789.98	1281	6899.38	1281	39148.9	1281	29431.5	1281	7973.37	1281	6866.3
1282	19542.9	1282	14698.8	1282	7037.85	1282	5834.32	1282	40924.8	1282	34162.6	1282	7030.72	1282	4634.93
1283	21525.5	1283	16551.3	1283	6357.01	1283	4890.72	1283	43884.8	1283	36369.3	1283	8175.66	1283	5358.14
1284	18425.8	1284	12903.6	1284	7095.41	1284	6299.1	1284	44748.6	1284	39331.8	1284	7147.14	1284	6103.17
1285	17171.4	1285	11716.5	1285	8647.46	1285	7993.63	1285	43356.6	1285	31509.5	1285	7088.7	1285	7232.5
1286	15128.3	1286	11102	1286	10365.7	1286	9892.49	1286	44615.5	1286	38085.5	1286	7904.18	1286	7493.13
1287	15433.3	1287	11459.9	1287	13470.4	1287	11961.7	1287	42177.2	1287	39363.5	1287	9260.09	1287	7191.41
1288	16885.2	1288	13697.7	1288	11644.2	1288	11571.9	1288	41740.5	1288	34399.4	1288	9425.5	1288	8148.59
1289	15537.4	1289	14423.9	1289	14496.8	1289	16126.5	1289	43858.4	1289	39317	1289	9441.74	1289	8856.67
1290	15927	1290	14370.4	1290	10324.2	1290	13609.4	1290	42687.4	1290	40349.9	1290	9034.12	1290	7518.99
1291	15299.5	1291	12081.3	1291	10609.7	1291	12926.3	1291	40040.1	1291	39732.7	1291	8953.63	1291	7066.66
1292	16618.3	1292	13045.7	1292	4013.14	1292	4843.51	1292	39105.5	1292	40277.3	1292	7516.38	1292	7832.66
1293	15839.6	1293	10962.7	1293	5111.05	1293	5744.96	1293	43687.9	1293	41511.4	1293	7385.17	1293	6593.19
1294	17072.4	1294	11748	1294	6501.9	1294	5806.57	1294	41602.1	1294	42236.5	1294	8129.51	1294	4962.82
1295	20247.4	1295	14364.8	1295	8227.02	1295	7368.38	1295	37677.9	1295	40496.4	1295	8886.82	1295	5645.14
1296	21556.6	1296	16144	1296	9529.05	1296	8813.12	1296	31486.6	1296	35052.2	1296	8927.11	1296	7249.34
1297	22899.8	1297	18491.8	1297	11535.7	1297	10065.5	1297	36219.1	1297	36377.1	1297	9095.02	1297	6198.15
1298	21017	1298	19294.9	1298	12515.5	1298	10513.3	1298	35743.8	1298	37474.2	1298	9296.8	1298	6894.26
1299	19965.7	1299	20612.1	1299	13258.3	1299	10657.9	1299	29126.2	1299	34503.5	1299	9187.57	1299	7425.91
1300	15630.5	1300	15272.1	1300	14104.2	1300	11234.4	1300	27372.1	1300	33580.5	1300	9486.4	1300	8249.66
1301	18361.7	1301	17409.5	1301	17987.2	1301	15409.9	1301	31166.7	1301	36074.9	1301	10597.4	1301	9237.98
1302	20500.3	1302	18588.2	1302	15702.3	1302	13642.9	1302	25693.6	1302	31507.6	1302	10457	1302	8881.89
1303	22979.2	1303	17476.4	1303	13791.6	1303	12342.5	1303	26238.9	1303	31005.1	1303	10252.4	1303	8162.98
1304	24318.1	1304	17399.7	1304	10662.4	1304	9250.81	1304	31350.6	1304	37648.8	1304	10181.2	1304	7146.02
1305	25827.5	1305	18834.5	1305	9475.94	1305	8407.85	1305	24414	1305	31427.1	1305	8976.6	1305	6658.42
1306	26880	1306	19830.2	1306	9858.01	1306	9099.25	1306	38763.2	1306	44084.1	1306	8849.35	1306	6304.94
1307	22199.7	1307	18236.1	1307	11077.1	1307	10556.9	1307	31416.9	1307	35933.2	1307	7870.41	1307	5574.75
1308	19191.4	1308	15696.7	1308	11453.2	1308	11692.9	1308	47784.3	1308	46968.8	1308	7655.39	1308	5395.5
1309	18134.1	1309	15272.9	1309	13991.9	1309	12584.8	1309	42232.1	1309	43143.2	1309	8661.4	1309	6372.66
1310	15640.3	1310	12131.3	1310	17460	1310	16433.6	1310	44082.2	1310	43499	1310	8893.9	1310	5509.74
1311	16299.3	1311	14158.6	1311	18532.9	1311	18838.9	1311	43341	1311	43335.3	1311	8843.93	1311	6599.56
1312	15219	1312	11621.4	1312	15562.8	1312	16598.9	1312	41342.4	1312	40484.1	1312	8097.3	1312	7264.37
1313	12237.7	1313	10066.9	1313	12809.5	1313	12813.4	1313	39232.5	1313	41237.2	1313	7932.6	1313	6114.69
1314	14360	1314	11888.7	1314	10650.3	1314	10372.4	1314	36218.8	1314	38961.6	1314	8333.53	1314	6635.13
1315	11504.8	1315	10911.3	1315	8514.69	1315	8873.89	1315	33219.5	1315	36233.6	1315	8885.3	1315	5748.85
1316	12268.3	1316	11523	1316	8464.32	1316	8296.11	1316	29971.2	1316	34947.1	1316	10374.2	1316	7661.93
1317	12596.2	1317	12463.3	1317	9702.34	1317	9095.99	1317	35424.6	1317	36096.9	1317	12477.8	1317	9608.54
1318	12160.3	1318	9965.29	1318	8510.54	1318	7163.49	1318	33533.5	1318	32702.1	1318	12667.7	1318	11288.8
1319	12554.2	1319	11155.3	1319	8169.8	1319	6905.9	1319	33153.6	1319	34963.3	1319	11648.9	1319	8454.3
1320	12693.6	1320	8691.2	1320	7172.16	1320	5704.14	1320	35536.1	1320	28854.7	1320	12309.4	1320	8750.65
1321	11383.2	1321	7650.16	1321	6409.85	1321	6117.85	1321	33992.2	1321	32267.5	1321	12946.9	1321	9633.61
1322	12191.1	1322	8345.61	1322	6242.21	1322	6174.81	1322	33815.4	1322	33881.6	1322	13058.9	1322	9995.26
1323	16893.8	1323	12339.7	1323	6206.93	1323	5441.39	1323	30745.4	1323	25137.7	1323	12335.7	1323	9230.17
1324	16617.5	1324	12890.4	1324	6879.24	1324	5072.7	1324	32786.8	1324	30352.5	1324	12073.2	1324	10117
1325	15688	1325	13294.7	1325	5645.33	1325	4133.5	1325	33584.9	1325	30153.7	1325	10633.5	1325	8032.68
1326	19480	1326	16223.1	1326	6235.02	1326	5527.72	1326	32095	1326	25646	1326	10959.4	1326	8909.98
1327	21751.3	1327	20240.9	1327	6213.51	1327	5481.28	1327	31516.9	1327	24705.9	1327	8574.09	1327	5336.75
1328	22497.7	1328	21186.6	1328	6987.92	1328	6539.56	1328	26535.3	1328	18512.5	1328	8355.32	1328	5978.29
1329	22077.9	1329	20321.1	1329	6382.15	1329	5909.5	1329	28637.1	1329	21784	1329	9340.7	1329	5271.06
1330	21725.3	1330	20398.2	1330	5652.55	1330	5191.61	1330	23224.9	1330	14666.5	1330	9215.95	1330	6069.97
1331	20091.1	1331	15077.5	1331	4436.97	1331	3705.88	1331	25189.9	1331	18384.8	1331	10439.6	1331	6359.17
1332	18305.6	1332	13354.2	1332	5970.19	1332	5418.41	1332	25805.2	1332	18565	1332	10269.1	1332	6084.88
1333	19763.8	1333	15184	1333	5825.3	1333	6039.7	1333	24015.3	1333	17779.2	1333	10083.1	1333	6957.28
1334	16660.4	1334	12499.7	1334	7536.87	1334	7479.64	1334	25411.7	1334	21057.2	1334	9495.93	1334	6929.52
1335	15742.4	1335	11961.2	1335	7318.52	1335	5956.1	1335	21043.4	1335	13255.6	1335	9764.82	1335	7270.67
1336	18933.5	1336	14280.6	1336	6935.3	1336	5423.55	1336	24062.8	1336	17423.1	1336	9460.88	1336	7260.15
1337	21012	1337	17396	1337	6803.21	1337	5801.28	1337	26941.3	1337	19406.8	1337	10279.7	1337	8126.84
1338	24083.1	1338	22305.9	1338	7175.04	1338	5491.11	1338	25572	1338	20847.8	1338	10989.2	1338	8369.74
1339	22648.1	1339	21703.6	1339	8457.34	1339	5750.04	1339	27325.7	1339	24683.6	1339	11885.2	1339	8208.23
1340	21015.5	1340	19483.5	1340	9114.42	1340	6564.72	1340	26039	1340	21338	1340	12320.4	1340	9659.88
1341	20489.5	1341	18896.7	1341	11316.6	1341	8499.07	1341	26717.6	1341	27021.8	1341	12092.8	1341	9041.04
1342	20438.8	1342	18889.6	1342	14322.1	1342	10709.3	1342	24811.3	1342	26234.1	1342	12668.2	1342	8416.97
1343	20065.5	1343	19100.1	1343	18334	1343	14860.7	1343	22482.3	1343	24781.5	1343	11995.1	1343	8009.55
1344	18796	1344	18425.9	1344	18770.2	1344	17529.2	1344	19788.5	1344	21831	1344	11676.7	1344	8775.58
1345	19157.2	1345	16911.7	1345	20752.8	1345	18653.9	1345	17825.3	1345	19739.7	1345	10921.4	1345	8314.43
1346	19523.9	1346	17068	1346	18382.5	1346	17525.5	1346	16767.6	1346	17242.7	1346	10697.1	1346	7672.17
1347	18432.4	1347	16851.6	1347	20092.4	1347	18008.7	1347	18637.1	1347	16315.7	1347	10146.1	1347	6861.57
1348	18288.9	1348	17179.5	1348	23921.6	1348	22480.7	1348	17907.8	1348	15466.3	1348	10077.2	1348	8619.1
1349	17386.3	1349	16839.8	1349	24067.4	1349	19922	1349	17387.6	1349	15657.7	1349	9245.6	1349	9044.76
1350	16764.6	1350	16207.7	1350	19330.5	1350	14581.9	1350	17012.1	1350	16567.1	1350	9205.28	1350	8700.24
1351	15417.8	1351	16358.5	1351	21120.2	1351	17268.6	1351	16619.4	1351	18759.6	1351	8289.87	1351	6658.2
1352	14858.5	1352	16628.2	1352	15512.5	1352	11184.4	1352	18912.6	1352	21705.2	1352	8157.46	1352	7470.43
1353	15387.1	1353	14443.7	1353	9250.83	1353	5592.85	1353	17463.2	1353	20565.6	1353	6992.79	1353	5809.89
1354	15530.8	1354	14098.3	1354	7676.21	1354	5653.3	1354	15762.3	1354	18264.6	1354	7848.31	1354	5797.32
1355	13667.6	1355	11641.1	1355	9279.37	1355	8401.32	1355	16363.2	1355	18352.1	1355	7847.32	1355	6608.51
1356	13683.5	1356	10472.3	1356	7998.24	1356	6893	1356	16263.1	1356	18247.1	1356	9447.72	1356	7863.64
1357	12447	1357	10208.5	1357	9399.29	1357	7570.49	1357	15903.2	1357	18037.3	1357	10645.1	1357	8821.33
1358	10327.3	1358	9278.31	1358	6551.09	1358	5304.12	1358	15417.4	1358	18768	1358	9589.4	1358	6336.24
1359	11586.4	1359	10797.4	1359	6759.36	1359	3658.73	1359	19522.1	1359	20651.5	1359	9716.69	1359	6935.8
1360	10651.4	1360	11144.4	1360	7015.9	1360	4908.06	1360	17189.7	1360	18932.6	1360	9914.3	1360	8812.66
1361	9507.26	1361	10631	1361	7402.93	1361	6158.6	1361	16682.4	1361	18046.7	1361	10571.7	1361	8789.78
1362	7778.31	1362	8747.3	1362	5987.54	1362	4486	1362	17645.4	1362	16129.9	1362	10896.2	1362	7799.89
1363	8333.82	1363	8850.85	1363	6802.07	1363	6536.32	1363	17219.4	1363	14963	1363	11214.5	1363	7965.6
1364	10063.8	1364	10394.7	1364	9135.13	1364	8049.01	1364	18447.3	1364	16607	1364	10208.6	1364	7115.26
1365	11765.1	1365	11353.5	1365	7563.16	1365	7174.3	1365	18176.2	1365	17243	1365	9917.54	1365	6803.02
1366	14214.6	1366	13242.7	1366	8786.04	1366	7384.47	1366	16349.9	1366	17053.2	1366	9523.72	1366	6687.49
1367	14743.9	1367	13418.8	1367	9908.48	1367	8468.83	1367	17741.4	1367	14608.9	1367	8650.6	1367	7318.78
1368	15166.5	1368	12574	1368	10871.7	1368	9912.01	1368	16388.1	1368	16019.6	1368	9094.69	1368	5533.35
1369	17210.4	1369	14911.7	1369	11976.9	1369	10426.8	1369	15313.4	1369	16511.9	1369	7080.11	1369	5408.76
1370	16909.3	1370	15366	1370	13850.5	1370	11593	1370	13730.2	1370	14787.7	1370	8392.43	1370	5220.24
1371	12768.6	1371	12311	1371	21781.8	1371	18304.6	1371	11370.7	1371	10569.5	1371	8796.52	1371	5411.86
1372	18822.9	1372	17076.3	1372	21732.8	1372	18035.5	1372	10020.8	1372	9359.51	1372	9206.65	1372	6802.37
1373	16072.1	1373	15396.1	1373	19605.9	1373	16567.9	1373	7421.94	1373	7373.49	1373	9040.39	1373	7440.7
1374	19186.7	1374	17775.2	1374	16448.4	1374	14650.3	1374	7188.57	1374	7544.36	1374	9897.77	1374	7311.26
1375	16791.8	1375	12730.2	1375	15982.9	1375	13925	1375	8435.27	1375	10776.5	1375	10836.8	1375	7609.01
1376	14722.6	1376	11227.5	1376	15982.4	1376	14973.2	1376	8817.61	1376	9891.51	1376	11292	1376	8456.06
1377	13994.9	1377	10328.3	1377	16103.8	1377	16258.2	1377	8256.03	1377	8291.84	1377	11678	1377	9419.63
1378	13465.2	1378	10170.3	1378	15129.3	1378	15599.7	1378	7993.7	1378	9342.02	1378	12058	1378	9691.1
1379	12865.2	1379	9087.89	1379	18404.8	1379	19154.3	1379	9642.74	1379	12084.9	1379	14166.1	1379	11800.7
1380	12469.1	1380	7850.3	1380	16811.1	1380	17103.8	1380	9683.79	1380	12475	1380	11773.8	1380	10349.2
1381	13263.4	1381	8594.28	1381	16139.8	1381	15604.6	1381	9607.14	1381	11832.5	1381	12776.4	1381	10546.5
1382	12567.8	1382	8693.33	1382	15274.1	1382	14493.3	1382	10095.8	1382	11074.9	1382	14850	1382	11613.1
1383	12944.9	1383	9659.6	1383	13446.6	1383	12891.6	1383	9703.79	1383	12031.7	1383	15585.2	1383	13175
1384	11273.7	1384	8057.81	1384	11988	1384	12025.7	1384	9298.15	1384	13089.6	1384	14495.7	1384	12170.8
1385	11079.6	1385	7853.59	1385	13059.7	1385	12695.4	1385	14074.5	1385	17955.5	1385	13868.3	1385	12240
1386	9812.91	1386	6285.02	1386	11196	1386	12692.8	1386	13360.4	1386	16336.1	1386	12771.4	1386	11756.1
1387	9942.53	1387	6069.91	1387	11998.1	1387	12322.1	1387	14758.7	1387	13826.1	1387	12016.1	1387	10725.7
1388	11796.6	1388	9456.38	1388	14183.6	1388	12492.5	1388	13268.6	1388	12876.8	1388	12070.6	1388	9657.83
1389	13173.1	1389	9354.78	1389	14783.2	1389	13044.1	1389	12094.5	1389	11626.2	1389	11873.9	1389	9735.4
1390	14489.4	1390	11306.9	1390	15173.1	1390	13798.7	1390	13751.9	1390	13235.2	1390	11544.5	1390	8931.3
1391	15424.5	1391	12085.9	1391	17630.8	1391	16353.9	1391	14400.4	1391	13736.3	1391	11925.5	1391	9047.39
1392	15745.1	1392	12124.6	1392	17526.2	1392	15944.4	1392	16485.6	1392	16385.4	1392	11137.8	1392	7412.31
1393	15536.3	1393	12694.1	1393	19453.1	1393	18423.3	1393	14803.9	1393	18335.9	1393	10756.9	1393	6845.18
1394	13640.3	1394	10874.6	1394	22286.9	1394	20511.9	1394	16203.2	1394	18768.6	1394	18603.9	1394	13613.5
1395	10428	1395	9150.22	1395	22676.2	1395	20024.4	1395	12182.2	1395	14090.4	1395	18258.6	1395	13940.4
1396	11663.6	1396	9736.71	1396	18732.9	1396	15500.6	1396	11362.8	1396	12354.9	1396	22899.5	1396	18903.7
1397	9978.35	1397	9838.42	1397	16153	1397	15108.4	1397	12387.4	1397	12563.2	1397	28522.4	1397	24434.8
1398	10099.4	1398	10680.6	1398	16395.6	1398	16695.8	1398	12707.6	1398	12551.9	1398	29938.6	1398	26696
1399	10041	1399	8910.13	1399	16874.7	1399	16937.7	1399	10510.7	1399	12669.8	1399	26895.1	1399	23628.5
1400	11178.9	1400	11211.6	1400	16636.7	1400	15525.9	1400	11044.7	1400	10871.9	1400	29897.7	1400	28844
1401	13373.1	1401	13130.1	1401	17605	1401	16787.6	1401	8394.42	1401	8169.07	1401	29475	1401	27793.5
1402	15480.5	1402	14960.3	1402	18636.5	1402	18401.5	1402	7416.05	1402	7068.64	1402	30751.6	1402	27254.4
1403	13682.3	1403	12483.1	1403	19041.5	1403	18963.7	1403	7275.88	1403	6384.33	1403	30536.8	1403	28098.8
1404	9547.53	1404	8255.53	1404	18636.5	1404	18248.1	1404	6185.17	1404	6688.66	1404	32151.5	1404	27190
1405	9662.94	1405	7658.03	1405	15994	1405	14888.9	1405	5951.55	1405	5355.19	1405	32258.7	1405	28109.1
1406	9933.94	1406	7235.66	1406	13387.5	1406	11042.6	1406	4535.06	1406	3558.89	1406	30534.2	1406	25285.8
1407	9584.98	1407	6039.08	1407	14617.2	1407	13124.5	1407	3620.24	1407	2733.07	1407	25337.7	1407	21773.4
1408	12303	1408	7050.27	1408	9226.43	1408	8518.86	1408	3499.03	1408	2262.76	1408	24410.8	1408	20663.7
1409	9361.88	1409	5806.6	1409	7968.58	1409	7495.63	1409	3962.74	1409	2826.36	1409	25346.2	1409	22776.2
1410	9133.98	1410	6944.09	1410	6047.67	1410	6298.3	1410	3700.96	1410	2786.65	1410	22281.3	1410	19031.4
1411	11213.5	1411	8898.64	1411	3718.7	1411	2981.43	1411	2778.49	1411	1920.09	1411	23556.8	1411	20023.2
1412	10494.1	1412	8125.45	1412	2748.34	1412	2278.62	1412	3593.82	1412	3458.43	1412	24183.1	1412	21346.2
1413	9959.83	1413	6752.87	1413	2852.27	1413	3002.18	1413	3121.1	1413	2864.36	1413	22226.5	1413	18682.6
1414	12360.4	1414	8783.25	1414	3917.87	1414	4307.9	1414	3253.69	1414	2283.37	1414	25189.4	1414	20343.3
1415	12284.7	1415	8639.76	1415	3109.17	1415	3689.88	1415	4391.18	1415	3773.84	1415	22187.5	1415	16627.7
1416	12386.1	1416	8428.19	1416	4776.84	1416	6073.81	1416	5252.16	1416	4412.37	1416	26269	1416	22112.5
1417	10699.2	1417	7117.89	1417	5333.27	1417	6097.43	1417	5878.18	1417	4767.78	1417	24970.8	1417	21981.1
1418	10340.7	1418	5739.67	1418	6258.61	1418	6309.72	1418	5860.58	1418	5477.61	1418	22389.6	1418	20104.7
1419	8239.74	1419	5105.76	1419	7133.32	1419	5788.22	1419	6591.29	1419	5631.86	1419	20592.7	1419	16805.2
1420	7698.26	1420	5316.15	1420	6430.54	1420	4685.3	1420	8528.47	1420	7157.93	1420	19419.2	1420	14583.5
1421	7605.02	1421	5949.42	1421	5230.58	1421	4113.92	1421	9457.11	1421	7559.68	1421	26090.6	1421	23030
1422	6489.19	1422	4685.39	1422	8781.85	1422	8931.67	1422	10709.4	1422	9316.47	1422	23563.9	1422	20134.1
1423	7879.08	1423	4485.96	1423	9190.11	1423	9442.88	1423	11863.7	1423	11384.4	1423	23877.9	1423	22309.7
1424	5979.91	1424	3070.99	1424	8934.25	1424	9136.69	1424	12755.6	1424	13208.6	1424	21626.7	1424	17936.2
1425	3916.86	1425	2017.93	1425	8470.89	1425	8596.52	1425	11616.9	1425	11373.7	1425	18138.7	1425	15865.9
1426	7642.29	1426	3925.54	1426	7873.48	1426	8135.6	1426	11538	1426	9636.91	1426	19972.6	1426	17805.7
1427	10376.4	1427	6702.51	1427	7734.63	1427	6824.98	1427	9889.32	1427	7777.68	1427	20115.4	1427	17656.1
1428	7945.97	1428	4833.55	1428	7101.78	1428	5998.27	1428	7186.69	1428	5614.49	1428	19104.7	1428	15020
1429	7955.25	1429	5372.35	1429	4254.11	1429	4543.68	1429	4529.7	1429	3556.11	1429	20138.4	1429	16623
1430	10973	1430	8009.66	1430	5698.19	1430	6357.37	1430	3376.13	1430	3172.45	1430	17791	1430	16556.5
1431	12558.2	1431	9362.14	1431	6753.32	1431	7518.28	1431	2899.93	1431	2583.03	1431	16352.9	1431	16833.7
1432	11846.7	1432	7901.07	1432	8503.61	1432	8985	1432	2901.65	1432	2497.98	1432	13481.3	1432	15244.6
1433	14723.5	1433	10775.8	1433	9791.84	1433	10139.6	1433	3435.11	1433	4520.76	1433	12507.4	1433	14651.4
1434	14289.8	1434	8857.63	1434	10734.2	1434	11016.3	1434	4118.7	1434	4894.79	1434	12251	1434	14068.1
1435	16230.9	1435	11452.3	1435	10869.5	1435	11338.7	1435	5687.64	1435	6683.49	1435	9614.72	1435	10751.9
1436	15115.1	1436	10137.1	1436	10204.9	1436	9731.75	1436	4842.61	1436	5796.72	1436	8160.31	1436	8328.88
1437	15515.8	1437	12077.8	1437	8866.84	1437	8175.23	1437	5432.28	1437	5846.34	1437	7560.78	1437	6653.09
1438	15205.5	1438	11972.1	1438	14843	1438	13614.6	1438	5830.01	1438	6104.23	1438	6708.91	1438	6110.68
1439	14748.9	1439	11507.2	1439	18923.9	1439	17378.7	1439	4082.93	1439	4528.85	1439	5369.66	1439	5172.51
1440	14751.9	1440	13181	1440	17865.5	1440	15843	1440	6765.29	1440	7377.06	1440	4826.97	1440	4101.37
1441	13673.2	1441	13109.9	1441	19628.9	1441	17633.3	1441	7396.04	1441	7769.67	1441	4435.66	1441	3727.57
1442	13918.2	1442	12750.1	1442	19925.5	1442	16419.3	1442	5900.66	1442	7053.7	1442	5383.55	1442	4713.43
1443	15497.4	1443	11891.3	1443	15337	1443	11619.7	1443	7999.32	1443	8595.39	1443	4512.71	1443	4256.28
1444	13670.2	1444	11104.8	1444	10737.7	1444	7921.83	1444	8618.94	1444	6784.08	1444	5002.12	1444	4340.56
1445	12846	1445	11298.3	1445	13572.9	1445	10074.5	1445	8515.3	1445	6435.39	1445	6053.63	1445	3400.7
1446	12873.7	1446	11128.6	1446	13624.5	1446	11937.7	1446	9434.36	1446	8053.05	1446	8035.73	1446	6415.88
1447	12003.3	1447	11276.2	1447	13458.4	1447	11968.1	1447	9031.22	1447	7682.47	1447	8787.25	1447	6286.04
1448	10006	1448	10858.7	1448	12612.7	1448	12061.5	1448	9442.31	1448	7575.85	1448	10507.8	1448	8455.9
1449	11432.4	1449	10744.9	1449	11539.6	1449	10629.9	1449	9247.18	1449	8389.28	1449	8792.31	1449	6381.3
1450	11565	1450	10851	1450	11867.5	1450	10819.2	1450	9307.08	1450	7741.4	1450	9307.46	1450	6217.63
1451	12015.2	1451	11414.8	1451	11740.1	1451	10257.2	1451	10019.3	1451	8226.45	1451	7515.29	1451	5202.89
1452	12434	1452	11793.3	1452	13351.3	1452	11464.5	1452	9901.27	1452	9350.74	1452	6185.9	1452	5130.22
1453	12271.7	1453	14063.1	1453	14769	1453	13145.8	1453	9552.46	1453	9674.62	1453	7028.35	1453	6815.1
1454	12542.5	1454	15522.8	1454	15542.9	1454	13888.4	1454	9469.76	1454	9488.59	1454	7766.57	1454	6700.94
1455	13006.8	1455	16114.4	1455	14921.6	1455	13456.2	1455	9501.52	1455	9015.12	1455	7143.63	1455	5908.7
1456	14124.1	1456	15087.4	1456	15163.5	1456	13175.4	1456	9243.58	1456	7714.16	1456	5951.45	1456	4929.65
1457	14131.3	1457	14667	1457	14877.5	1457	12709.7	1457	9265.98	1457	7649.93	1457	5608.69	1457	4246.47
1458	12876.3	1458	13674.5	1458	14953.4	1458	10840.2	1458	9279.7	1458	8785.86	1458	5521.04	1458	3907.93
1459	12219.4	1459	12379.3	1459	16543.9	1459	13853	1459	9543.67	1459	8891.13	1459	4404.93	1459	3696.07
1460	12053.3	1460	12075.7	1460	17698	1460	15263.8	1460	9654.74	1460	8270.45	1460	4959.43	1460	3621.7
1461	10663.3	1461	9938.06	1461	18253.7	1461	15401.6	1461	10096.7	1461	8473.87	1461	7917.49	1461	6801.81
1462	10965.3	1462	9550.31	1462	20580.1	1462	17015.5	1462	8971.75	1462	7415.38	1462	8448	1462	6462.12
1463	9602.56	1463	8245.99	1463	18516	1463	15479.6	1463	8421.14	1463	8467.26	1463	8531.31	1463	7389.97
1464	10073.5	1464	9203.89	1464	16540.4	1464	13517.7	1464	8896.81	1464	7657.86	1464	10167.6	1464	9021.88
1465	12362.5	1465	10326.6	1465	13916.1	1465	10280.1	1465	8706.3	1465	8722.77	1465	10231.3	1465	10780.8
1466	10244.1	1466	9934.94	1466	12214.5	1466	9067.58	1466	8300.47	1466	7605.99	1466	10231	1466	9990.2
1467	10781	1467	9921.6	1467	10528.4	1467	8606.25	1467	8372.97	1467	7758.62	1467	9495.93	1467	9647.07
1468	12087.3	1468	10756.1	1468	9805.9	1468	8016.05	1468	8804.92	1468	9121.78	1468	8928.88	1468	8022.84
1469	11148.9	1469	10284.6	1469	11811.7	1469	11737.6	1469	8084.17	1469	7810.65	1469	8762.61	1469	7096.4
1470	11266.2	1470	10154.1	1470	11225.1	1470	10677.6	1470	12935	1470	12786.1	1470	8187.8	1470	7209.29
1471	11886	1471	10216.2	1471	11990.3	1471	10188.3	1471	14089.2	1471	14925.3	1471	7014.37	1471	7171.05
1472	12525.6	1472	10454.4	1472	12359.3	1472	10328.9	1472	14636.1	1472	15687.6	1472	7308.36	1472	6157.29
1473	12149.9	1473	9585.29	1473	12588	1473	11025.1	1473	13646.6	1473	14825	1473	6708.99	1473	5308.06
1474	11782.6	1474	8128.74	1474	16780.6	1474	15225	1474	14383.6	1474	15070.8	1474	8421.86	1474	5760.29
1475	11020.2	1475	8813.81	1475	18439	1475	18210.5	1475	15687.5	1475	16302.7	1475	8226.11	1475	6435.39
1476	13243.7	1476	12060.1	1476	18705	1476	18136.3	1476	11555.6	1476	13562.3	1476	8134.72	1476	5508.37
1477	13126.9	1477	11843	1477	18237.7	1477	18429.2	1477	11358.3	1477	12713.3	1477	7943.79	1477	6157.9
1478	13342.7	1478	11268.2	1478	17621.5	1478	17338.4	1478	12094.3	1478	12802.3	1478	7788.69	1478	5974.97
1479	13374.1	1479	12841.8	1479	18471.6	1479	17509.3	1479	10341.1	1479	12441.4	1479	9254.02	1479	7212.98
1480	12854.5	1480	12307.7	1480	17828.8	1480	18087.6	1480	11122.3	1480	12556.1	1480	10449.2	1480	8325.99
1481	13757.9	1481	13287.6	1481	15845.5	1481	15468.6	1481	9367.66	1481	12026.6	1481	12864.5	1481	10109.8
1482	13990.7	1482	12454.9	1482	15794.5	1482	14881.1	1482	7627.3	1482	11142.5	1482	14634.9	1482	12238.8
1483	14616.6	1483	12489.8	1483	16398.8	1483	14857.3	1483	6117.89	1483	8926.57	1483	19770.5	1483	16062.2
1484	13215	1484	12832.2	1484	17654.1	1484	15891.5	1484	7186.81	1484	9859.27	1484	19965	1484	16215.3
1485	13227.1	1485	12269	1485	21558.9	1485	18445.5	1485	4589.13	1485	6374.93	1485	24520.7	1485	20637.5
1486	12650.8	1486	11730.7	1486	23233.8	1486	19445.5	1486	6874.06	1486	8604.61	1486	27680.4	1486	22283.8
1487	12885.8	1487	11889.8	1487	20741	1487	17732.5	1487	6982.46	1487	9204	1487	28985.9	1487	24620.2
1488	13155.2	1488	12373.1	1488	19946.2	1488	16863.8	1488	8564.49	1488	11667.6	1488	26831.6	1488	24608.5
1489	13454.3	1489	13069.2	1489	20018	1489	16673.4	1489	7453.76	1489	11439.1	1489	23567	1489	21471.4
1490	12855.3	1490	12536.4	1490	18898	1490	16445.4	1490	7465.07	1490	11380	1490	18480.2	1490	17197.1
1491	12788	1491	11850.5	1491	18469.6	1491	17144.3	1491	9467.05	1491	13875.9	1491	14495	1491	11682.6
1492	12828.1	1492	11749	1492	17762.7	1492	17322.8	1492	9234.78	1492	13191.9	1492	11286.2	1492	9163.61
1493	13193.6	1493	12326	1493	17726.2	1493	17725.3	1493	10576.5	1493	13115.4	1493	9238.7	1493	6444.69
1494	13005.5	1494	12794.6	1494	18671.9	1494	18326.3	1494	10537.9	1494	14215.7	1494	8607.82	1494	6511.45
1495	14152.3	1495	13010.3	1495	18774.8	1495	18552.7	1495	12768.5	1495	16448.9	1495	8891.39	1495	7969.4
1496	14376.6	1496	12687.8	1496	17917.3	1496	16155.5	1496	13710.5	1496	16705.6	1496	15347.2	1496	12467.5
1497	14340.9	1497	11903.5	1497	15729.9	1497	11899	1497	16242.8	1497	17855.2	1497	13866.9	1497	12167.3
1498	13671.3	1498	12083.3	1498	15608.2	1498	12422.9	1498	19313.5	1498	19375.9	1498	15406.4	1498	14613.1
1499	12661.9	1499	11883.8	1499	12823.8	1499	10080.4	1499	18575.3	1499	20268.7	1499	12986.1	1499	12570.6
1500	11845.2	1500	9681.84	1500	10759.2	1500	9199.78	1500	17277.1	1500	19562.9	1500	12169.9	1500	11665.6
1501	11764.4	1501	8256.06	1501	9494.92	1501	8392.75	1501	18678.1	1501	19327.5	1501	12080.5	1501	10324.5
1502	12322.8	1502	9251.36	1502	11349.4	1502	10350.7	1502	16420	1502	17042.8	1502	12796.4	1502	11224.2
1503	11648.6	1503	9737.16	1503	10059.8	1503	8946.34	1503	17975.6	1503	18460.3	1503	12353.5	1503	11323.1
1504	12254	1504	10437.6	1504	10290.4	1504	10156.8	1504	19477	1504	18214.8	1504	11006.7	1504	8643.71
1505	11890.4	1505	8083.03	1505	11003.9	1505	11270.8	1505	20486	1505	19418.4	1505	11351.3	1505	9808.2
1506	11977.1	1506	9300.04	1506	12039.5	1506	13016.3	1506	21094.8	1506	19336.8	1506	9845.9	1506	8635.24
1507	12640.1	1507	10061.8	1507	12449.8	1507	13403.4	1507	20496.7	1507	16056.9	1507	7661.57	1507	6656.2
1508	11415	1508	10193.7	1508	14066.1	1508	13567.6	1508	18495.6	1508	16369.7	1508	11363.3	1508	10169.8
1509	11124.8	1509	10372.9	1509	16573	1509	15921.2	1509	17548.7	1509	14036.3	1509	10766.1	1509	8673.58
1510	10664.6	1510	10420.1	1510	16468.5	1510	15954.1	1510	15879.1	1510	12588.9	1510	11939	1510	9875.64
1511	9747.71	1511	9345.64	1511	14723.6	1511	15106.1	1511	13710.8	1511	9544.6	1511	12631.3	1511	11639.5
1512	8878.7	1512	8573.58	1512	14317.4	1512	13638.8	1512	14448.2	1512	10941.7	1512	13119.9	1512	11892.9
1513	8042.72	1513	7108.49	1513	12689.7	1513	11379.7	1513	14251.5	1513	10295.2	1513	13458.2	1513	11070.9
1514	6778.47	1514	5613.04	1514	10933.5	1514	9584.27	1514	13909.1	1514	9727.84	1514	14220.2	1514	13379
1515	5703.53	1515	4593.52	1515	10690.2	1515	10581.6	1515	14298.4	1515	10122.5	1515	14964.5	1515	13796
1516	5777.01	1516	4167.34	1516	10420.5	1516	10162	1516	13563	1516	9419.18	1516	16533	1516	14015.1
1517	7011.8	1517	5718.26	1517	10030.7	1517	10133.6	1517	13985	1517	9431.65	1517	19392.7	1517	16708.7
1518	7247.63	1518	5830.6	1518	8747.28	1518	8895.56	1518	13631.8	1518	9179.34	1518	19196.8	1518	15797.9
1519	7490.33	1519	6110.5	1519	9294.01	1519	9577.77	1519	14848.4	1519	9915.88	1519	20431.6	1519	16715
1520	7241.67	1520	5582.49	1520	8175.94	1520	8206.67	1520	12336.6	1520	7970.43	1520	20537.4	1520	16645.6
1521	7130.48	1521	5601.81	1521	8761.94	1521	8202.13	1521	9322.96	1521	5219.76	1521	20616.6	1521	16757.4
1522	8142.73	1522	5736.88	1522	8610.25	1522	8606.6	1522	13375.5	1522	9071.21	1522	20794.4	1522	15852.9
1523	8852.96	1523	5784.51	1523	9070.7	1523	9768.26	1523	9341.16	1523	6297.99	1523	18696.6	1523	15733.5
1524	8385.07	1524	6421.05	1524	11294.7	1524	12275.1	1524	9776.14	1524	6953.93	1524	17919.7	1524	15849.9
1525	7975.25	1525	6486.13	1525	13026.7	1525	12912.1	1525	7431.52	1525	6263.29	1525	19588.4	1525	17880.3
1526	6441.11	1526	5754.04	1526	15308.9	1526	15663.8	1526	9358.49	1526	6980.59	1526	18788.6	1526	17864.2
1527	5581.56	1527	5466.28	1527	17327.1	1527	16545.8	1527	7988.78	1527	8052.39	1527	20324.6	1527	18873.3
1528	6154.89	1528	5036.93	1528	17153.3	1528	16546.3	1528	9626.18	1528	8168.16	1528	22245.1	1528	20682.8
1529	5803.84	1529	4997.54	1529	17627	1529	15426.5	1529	9741.75	1529	11071.4	1529	22174.3	1529	20326.4
1530	6427.08	1530	5681.53	1530	17493.2	1530	15149.7	1530	10115	1530	11405.4	1530	22078.7	1530	19670
1531	6302.93	1531	5794.95	1531	16609.7	1531	16123.2	1531	10049.6	1531	10687.4	1531	20193.6	1531	17964.1
1532	5998.67	1532	5831.19	1532	16602.8	1532	15807.3	1532	8829.47	1532	7753.52	1532	20225.7	1532	17629.7
1533	6260.35	1533	6028.72	1533	17178.9	1533	15320.4	1533	8866.3	1533	7650.8	1533	18497.5	1533	15144
1534	5878.37	1534	4913.09	1534	17718.9	1534	19236.7	1534	6969.84	1534	6181.3	1534	17891.6	1534	14111.5
1535	6028.24	1535	5161.86	1535	16595.1	1535	17871	1535	7547.74	1535	6448.86	1535	16540.3	1535	13837.9
1536	6254.61	1536	5047.56	1536	16009.7	1536	16579.1	1536	6917.3	1536	6078.91	1536	15511.1	1536	13498.4
1537	5106.81	1537	4377.93	1537	17282.4	1537	16692.6	1537	9801.81	1537	8427.5	1537	14642.3	1537	13283
1538	4500.43	1538	3686.12	1538	15452.6	1538	14879.5	1538	8211.08	1538	8487.82	1538	14788	1538	12978.5
1539	4261.12	1539	3598.63	1539	16993.3	1539	15140	1539	8598.87	1539	9716.45	1539	14854.8	1539	14413.7
1540	3474.26	1540	3589.54	1540	15076.6	1540	13628.2	1540	8970.18	1540	9575.85	1540	15828.5	1540	14991.9
1541	3128.45	1541	3707.33	1541	13780.2	1541	12903.4	1541	8891.15	1541	7864.38	1541	16964.2	1541	16853.7
1542	2457.09	1542	3609.52	1542	14041	1542	14527.4	1542	9001.01	1542	8285.64	1542	18155.1	1542	17435.2
1543	3175.71	1543	3686.53	1543	14865.8	1543	15532.6	1543	8845.96	1543	8345.22	1543	17713.3	1543	16630.1
1544	3538.11	1544	3414.17	1544	16370.4	1544	17116	1544	8769.35	1544	9626.36	1544	20219.1	1544	16597.2
1545	4194.7	1545	3855.47	1545	18434.1	1545	18286.8	1545	10020.8	1545	10373.8	1545	17925.4	1545	14935.9
1546	3815.56	1546	3044.32	1546	15606.2	1546	15084.1	1546	9690.49	1546	10709.1	1546	19010.4	1546	15926.2
1547	3727.23	1547	2668.14	1547	14784.8	1547	14657.8	1547	10468.6	1547	10825.2	1547	20511.7	1547	19025
1548	4269.59	1548	3123.2	1548	13308.2	1548	13558.7	1548	11266	1548	9450.41	1548	21304.7	1548	20306.2
1549	3959.45	1549	3209.5	1549	12896.8	1549	13211.6	1549	12965.5	1549	13668.9	1549	22689.1	1549	20050.2
1550	5025.83	1550	5299.02	1550	13445.5	1550	12779	1550	11762.5	1550	14003.3	1550	24276.6	1550	23813.7
1551	4424.75	1551	3994.54	1551	11677.3	1551	11090.1	1551	13532.8	1551	14967.8	1551	26446	1551	25981
1552	4639.67	1552	3698.27	1552	9485.38	1552	9836.63	1552	13202.1	1552	12865.8	1552	27358.4	1552	24986.9
1553	6056.81	1553	4794.53	1553	9104.85	1553	9735.35	1553	11414.7	1553	11850.5	1553	25219.5	1553	21740.2
1554	5390.02	1554	5357.78	1554	8131.03	1554	9385.18	1554	10567.1	1554	9175.53	1554	22475	1554	17207.3
1555	5315.43	1555	4980.62	1555	6438.5	1555	7465.15	1555	9527.41	1555	8464.15	1555	18748.3	1555	14782.1
1556	4872.82	1556	4972.29	1556	5365	1556	6733.87	1556	10164.6	1556	9689.1	1556	15699.2	1556	12316
1557	4218.31	1557	4086.86	1557	4967.38	1557	6777.13	1557	10044.9	1557	10163.9	1557	13720.8	1557	9708.67
1558	3271.23	1558	3307.82	1558	5008.54	1558	6362.38	1558	10739	1558	10876.7	1558	14063.5	1558	10860.5
1559	474.183	1559	1307.64	1559	5707.49	1559	6110.73	1559	8726.68	1559	11027.4	1559	13051	1559	10857.3
1560	599.389	1560	1182.37	1560	6543.85	1560	7181.01	1560	9418.19	1560	10659.9	1560	13149	1560	11100.7
1561	630.196	1561	1353.22	1561	7279.33	1561	7065.24	1561	9664.05	1561	10794.8	1561	15017.5	1561	12259.4
1562	639.287	1562	1107.25	1562	7469.22	1562	6789.22	1562	7965.05	1562	10022.9	1562	15899.6	1562	13352.1
1563	859.196	1563	1114.81	1563	6772.72	1563	5593.67	1563	8612.98	1563	9825.43	1563	15132	1563	13817.9
1564	1060.69	1564	1810.22	1564	6040.17	1564	5623	1564	8421.8	1564	9438.25	1564	13509.6	1564	12463.8
1565	1563.27	1565	2437.01	1565	6145.03	1565	6070.58	1565	8932.55	1565	9456.58	1565	15192.4	1565	14162.6
1566	2248.89	1566	2597.18	1566	6745.56	1566	7331.47	1566	9360.38	1566	8306.35	1566	16107.7	1566	13994.7
1567	2737.91	1567	3001.17	1567	7312.58	1567	7549.11	1567	9129.09	1567	6481.55	1567	18760	1567	16700.3
1568	5837	1568	5899.86	1568	7864.52	1568	8446.43	1568	9012.58	1568	5666.67	1568	17576.3	1568	16010.7
1569	7614.47	1569	7574.66	1569	10026.7	1569	10897.8	1569	10443	1569	6568.08	1569	16634.7	1569	15030.1
1570	8129.16	1570	7773.64	1570	8276.5	1570	9190.34	1570	8605.11	1570	5252.07	1570	15491.3	1570	13454.2
1571	9144.45	1571	8178.74	1571	8173.34	1571	8684.35	1571	11683.4	1571	8468.09	1571	17485.7	1571	14428.4
1572	7284.34	1572	6622.17	1572	9628.96	1572	9939.68	1572	11387.1	1572	8759.09	1572	18677.6	1572	14827.2
1573	8093.33	1573	6473.83	1573	9707.63	1573	10264.9	1573	11999.2	1573	9266.3	1573	20724.3	1573	15967.9
1574	6490.34	1574	5307.03	1574	9481.19	1574	10233.4	1574	11877.5	1574	11476.4	1574	23972.8	1574	19513.3
1575	4944.31	1575	4603.69	1575	8320.93	1575	8826.04	1575	13271.2	1575	13222.6	1575	26013.9	1575	23163.3
1576	4121.89	1576	4083.71	1576	6599.36	1576	6397.26	1576	15503.6	1576	16464	1576	24032.4	1576	22565.9
1577	4647.69	1577	4267.82	1577	7802.39	1577	7239.61	1577	15478.3	1577	16544.3	1577	23686.9	1577	21934.8
1578	7341.82	1578	7576.01	1578	7070.2	1578	6490.53	1578	17089.9	1578	16967.5	1578	23474.5	1578	18656.4
1579	9459.19	1579	9226.07	1579	8405.49	1579	7143.15	1579	18702.8	1579	17236.3	1579	24616.1	1579	19495.7
1580	8546.04	1580	7063.28	1580	8212	1580	7180.91	1580	19718.1	1580	17315.1	1580	24143.7	1580	19075.9
1581	6960.18	1581	5749.49	1581	7011.63	1581	7091.06	1581	20084.1	1581	19982.6	1581	24573	1581	23172.3
1582	8031.43	1582	7419.29	1582	6421.2	1582	6723.07	1582	23424.5	1582	22063.8	1582	18692.7	1582	16126.9
1583	9082.01	1583	7851.87	1583	5364.83	1583	5382.66	1583	23011.1	1583	24324.7	1583	21459.7	1583	16525.6
1584	7863.5	1584	6643.48	1584	4350.05	1584	4741.04	1584	23780	1584	26296.5	1584	19020.3	1584	12804.3
1585	7632.21	1585	6418.52	1585	3530.23	1585	3874.26	1585	23789	1585	25658.5	1585	18646.5	1585	12785.6
1586	8175.35	1586	6420.65	1586	6990.38	1586	7732.07	1586	24555.7	1586	24123.6	1586	18075.2	1586	12985.6
1587	7556.42	1587	5116.13	1587	6561.29	1587	7562.49	1587	23342	1587	21587.3	1587	16798.9	1587	12279.6
1588	5075.48	1588	3641.01	1588	9873.48	1588	8796.96	1588	23477.2	1588	18826.6	1588	17017	1588	13103.5
1589	4886	1589	3640.74	1589	10108.6	1589	8059.94	1589	17980.6	1589	13238.2	1589	18153.2	1589	12439.8
1590	4350.93	1590	4053.56	1590	9906.64	1590	7663.7	1590	17313.1	1590	11664.8	1590	16416.4	1590	12059.1
1591	5212.79	1591	4044.42	1591	10872.2	1591	8833.67	1591	18451.9	1591	15112	1591	17357.3	1591	13779.5
1592	7023.13	1592	6046.04	1592	12906.5	1592	11716.2	1592	21648.5	1592	19112.8	1592	17429.8	1592	15554.6
1593	6843.82	1593	5520.71	1593	14831.9	1593	13237.2	1593	21072.3	1593	19927.1	1593	19587	1593	17647
1594	8031.36	1594	5809.35	1594	13972.9	1594	11811	1594	18917.8	1594	19279.3	1594	23454.3	1594	20436.8
1595	6832.7	1595	4121.79	1595	13918.1	1595	12429.4	1595	19451	1595	19062.2	1595	25641.9	1595	18907.3
1596	6426.18	1596	4022.41	1596	13933.3	1596	12320.2	1596	14938.1	1596	16690.1	1596	27603.5	1596	18843.1
1597	3591.9	1597	1507.45	1597	16175	1597	13775.8	1597	16218.4	1597	16954.3	1597	28214.1	1597	18673.8
1598	5316.78	1598	2327.88	1598	16609.3	1598	14128.3	1598	12063.6	1598	10899.2	1598	27026.3	1598	18870.3
1599	7112.79	1599	3192.75	1599	16671.9	1599	15084.5	1599	11237.2	1599	8636.13	1599	29478.3	1599	23047.4
1600	8244.42	1600	4489.07	1600	16923.7	1600	15794.9	1600	11118	1600	8805.42	1600	32092.5	1600	25456.7
1601	9010.16	1601	6270.23	1601	15434.7	1601	16107.1	1601	8811.64	1601	8254.42	1601	29715.7	1601	23125.3
1602	9163.97	1602	5264.78	1602	13528.2	1602	14069	1602	6567.93	1602	5453.4	1602	28649.9	1602	22977.6
1603	11378.3	1603	7604.47	1603	14368.4	1603	14679.8	1603	7685.77	1603	6526.54	1603	26748.5	1603	21667.7
1604	11991.1	1604	9420.21	1604	13362.7	1604	13213	1604	7153.89	1604	6975.46	1604	30771.4	1604	26324
1605	11743.8	1605	9890.42	1605	10576.5	1605	10334.3	1605	8620.1	1605	7881.46	1605	30068.5	1605	24870.4
1606	12881.8	1606	9960.12	1606	12001.8	1606	12020.1	1606	9031.43	1606	8348.1	1606	28669.8	1606	23301.2
1607	13295.4	1607	14503.3	1607	13243.6	1607	12509.8	1607	11290.9	1607	11273.6	1607	24267.8	1607	19310
1608	13397.6	1608	11971.4	1608	11576.6	1608	10734.9	1608	11792.9	1608	11559.4	1608	22959.7	1608	16427.2
1609	12165.8	1609	12420.2	1609	11004.9	1609	9754.04	1609	12166.6	1609	12387.2	1609	23565.3	1609	16767.6
1610	11273.9	1610	12949	1610	11937.2	1610	10642.3	1610	14144.9	1610	15576.7	1610	22859.6	1610	15964.7
1611	10544.3	1611	11441.3	1611	11689.4	1611	9997.5	1611	14128.5	1611	14685.4	1611	27293.7	1611	20607.5
1612	10498	1612	10713.3	1612	12564.1	1612	11413.6	1612	14793	1612	15675.7	1612	29536.9	1612	23981.4
1613	10961.8	1613	11990.2	1613	13117	1613	13053.3	1613	15304.3	1613	16653.9	1613	28101.9	1613	21639.6
1614	10762	1614	11369.9	1614	12252.2	1614	12296.4	1614	16518.2	1614	14531.6	1614	29932.6	1614	26087.7
1615	10855.7	1615	10930.7	1615	12242.9	1615	11818	1615	17091.6	1615	16515.7	1615	32954.6	1615	27157.2
1616	11153.8	1616	11519.6	1616	11975.7	1616	11085.7	1616	21968.6	1616	17819.4	1616	31945.3	1616	27963.6
1617	11323.1	1617	10598.2	1617	12208.8	1617	11016.4	1617	17702.6	1617	16535.5	1617	35508.9	1617	31595.2
1618	11548.7	1618	10551	1618	12013.5	1618	12109.6	1618	20244.6	1618	15314.7	1618	36497.8	1618	34278.9
1619	10711.3	1619	10431.2	1619	11932.3	1619	11663.3	1619	21162.7	1619	14593	1619	37603.3	1619	35812.8
1620	6181.74	1620	6164.19	1620	11293.4	1620	11032.8	1620	23432.3	1620	14687.8	1620	34866.2	1620	32327.1
1621	7729.29	1621	7648.91	1621	11450.3	1621	10571.3	1621	23898.8	1621	15426.9	1621	35252.7	1621	32849.6
1622	6105.1	1622	7085.36	1622	9896.94	1622	9409.98	1622	21029.3	1622	14177.6	1622	34169.7	1622	31480.6
1623	5654	1623	6705.59	1623	8868.7	1623	8930.92	1623	18308	1623	13003.5	1623	32024.3	1623	29454.5
1624	4876.6	1624	5528.9	1624	8066.17	1624	7968.23	1624	23007.3	1624	16672.3	1624	33456.1	1624	29301.5
1625	5637.07	1625	5315.76	1625	7325.59	1625	7208.84	1625	20527.7	1625	15143.7	1625	31883	1625	29139.1
1626	7054.09	1626	5421.2	1626	8088.81	1626	7924.68	1626	18609	1626	14836.4	1626	32203.1	1626	27739.3
1627	7603.9	1627	5677.3	1627	8640.32	1627	9074.3	1627	18150.8	1627	15342.3	1627	29557.4	1627	24025.9
1628	7934.74	1628	6606.06	1628	7561.63	1628	8411.69	1628	17612.9	1628	13185.5	1628	29119.6	1628	24272.9
1629	9267.93	1629	6710.28	1629	9803.85	1629	10854.3	1629	16840.7	1629	12318.6	1629	26558.2	1629	20504.3
1630	10147.9	1630	7956.33	1630	9028.76	1630	9487.57	1630	14478.5	1630	11146.3	1630	28458.6	1630	24317.6
1631	10626.2	1631	8352.06	1631	9740.06	1631	9851.95	1631	12514.4	1631	11580.8	1631	26583.1	1631	22468.4
1632	10828.1	1632	9794.61	1632	10659.2	1632	10135.1	1632	12742.7	1632	12040.7	1632	27043.6	1632	23665.2
1633	10028	1633	10003	1633	12322.7	1633	10453.4	1633	10370.4	1633	9915.67	1633	29245.5	1633	25511.4
1634	9169.32	1634	9707.27	1634	11836.9	1634	10233.4	1634	9270.53	1634	9590.42	1634	27837.2	1634	24258.7
1635	8470.07	1635	8798.63	1635	11094.7	1635	9657.04	1635	6897.88	1635	9404.7	1635	27542.4	1635	22852.2
1636	8207.39	1636	7360.38	1636	11443.7	1636	10294.8	1636	6501.27	1636	8603.95	1636	22148.6	1636	17628.2
1637	7732.25	1637	6594.17	1637	10874.9	1637	8410.31	1637	6952.1	1637	8350.53	1637	26864.7	1637	22600.4
1638	6223.37	1638	5152.15	1638	11081.6	1638	8776.15	1638	7819.27	1638	7678.74	1638	28968.1	1638	25500.7
1639	4622.55	1639	3435.5	1639	11302.9	1639	9466.6	1639	8317.34	1639	7337.48	1639	27461.9	1639	23071.5
1640	3292.83	1640	3485.57	1640	9868.29	1640	9025.05	1640	8547.94	1640	8138.98	1640	22620.3	1640	17896.5
1641	3179.14	1641	3349.08	1641	10227.5	1641	9208.06	1641	11055.7	1641	9693.04	1641	17308.6	1641	14956.8
1642	3510.12	1642	3630.43	1642	10298.4	1642	9260.44	1642	10991.8	1642	9242.05	1642	17448.3	1642	14232.7
1643	5660.1	1643	4795.28	1643	10431.7	1643	9269.51	1643	12489.1	1643	11017.3	1643	13486.3	1643	9618.23
1644	5965.7	1644	5232.34	1644	11133.6	1644	9071.9	1644	11116.9	1644	9438.53	1644	8494.81	1644	5993.01
1645	7223	1645	6424.37	1645	11578.2	1645	9546.06	1645	13417.9	1645	11675.5	1645	8412.31	1645	5161.74
1646	8040.69	1646	6030.58	1646	12881.4	1646	10510.9	1646	9220.75	1646	9862.74	1646	5228.98	1646	5546.58
1647	7493.26	1647	5921.87	1647	12744.6	1647	10989.3	1647	9853.15	1647	10470	1647	7889.87	1647	7288.85
1648	6394.57	1648	5465.29	1648	14218.4	1648	12224.7	1648	11152	1648	10536.1	1648	8718.82	1648	7855.34
1649	6159.04	1649	5239.74	1649	15620.2	1649	13679.4	1649	11772	1649	10847.5	1649	8656.19	1649	7189.95
1650	5512.9	1650	4182.18	1650	14645	1650	13319.8	1650	11997.2	1650	8774.05	1650	12626.9	1650	11358.6
1651	5818.77	1651	4918.48	1651	15799.9	1651	14558.7	1651	9921.11	1651	6844.37	1651	10552.4	1651	9186.68
1652	6668.04	1652	5855.1	1652	15526	1652	14218.6	1652	9651.81	1652	6779.34	1652	14422.3	1652	12078.6
1653	7263.96	1653	6059.57	1653	15617.9	1653	14090.8	1653	8992.13	1653	5820.92	1653	15530.1	1653	14326.6
1654	8479.04	1654	6849.4	1654	16127.9	1654	15322.2	1654	7815.92	1654	6104.99	1654	14618.7	1654	12722
1655	11504.4	1655	8119.02	1655	17192.1	1655	16295.3	1655	6842.87	1655	6218.84	1655	14623.6	1655	11773
1656	13177	1656	8590.61	1656	17296.1	1656	15607.1	1656	5974.97	1656	5651.36	1656	15980.4	1656	12778
1657	14797.6	1657	11196.4	1657	16661.8	1657	14304.6	1657	6608.19	1657	5174.14	1657	12753.3	1657	9959.16
1658	14630.1	1658	11443.3	1658	15059.4	1658	12763.6	1658	6218.21	1658	6130.54	1658	13795.2	1658	12754.7
1659	14167.9	1659	11889.7	1659	14836.8	1659	13200.4	1659	7584.66	1659	6689.56	1659	14643.2	1659	13157.2
1660	14339.9	1660	12238.8	1660	15622.2	1660	15206.2	1660	8129.67	1660	6090.06	1660	13696.8	1660	11739.6
1661	11973.2	1661	12230.2	1661	16989.1	1661	14749.8	1661	8851.77	1661	5853.52	1661	12709.1	1661	10529.4
1662	10737	1662	10815.9	1662	20207	1662	16485.9	1662	7762.48	1662	5111.39	1662	16015.3	1662	14721.6
1663	10671	1663	9982.81	1663	22467.4	1663	18830.8	1663	8188.18	1663	5726.1	1663	12971.2	1663	11866.1
1664	9907.48	1664	9641.7	1664	21367.8	1664	18032.7	1664	8127.58	1664	6395.81	1664	10905	1664	9216.02
1665	10141.1	1665	9137.08	1665	19051	1665	15334.2	1665	9004.04	1665	6758.44	1665	13616.2	1665	10564.6
1666	12896	1666	11295.5	1666	16374.7	1666	13160	1666	10791.5	1666	10527.4	1666	10467.4	1666	8061.08
1667	12442.5	1667	11085.5	1667	15418.6	1667	12329.1	1667	12310.6	1667	11784.3	1667	13844.5	1667	11988
1668	11212.1	1668	11516.3	1668	15006.5	1668	11502.4	1668	13666.3	1668	12721.1	1668	11062.6	1668	10112.2
1669	10847.2	1669	11171.7	1669	13362.9	1669	11294.2	1669	16763.3	1669	14311.3	1669	17057	1669	15589.8
1670	12336.7	1670	11283.8	1670	12838.4	1670	12288	1670	18105	1670	15271.2	1670	14398.7	1670	12832.4
1671	12267.6	1671	10124.3	1671	12827.8	1671	12797.9	1671	17285.8	1671	14828.2	1671	11810.7	1671	10487.7
1672	12091.3	1672	10804.9	1672	12406.9	1672	11504.6	1672	18688.3	1672	16101.1	1672	10728.9	1672	9685.35
1673	9623.34	1673	8157.46	1673	11603.1	1673	11316	1673	19322.6	1673	15424.1	1673	13079.9	1673	12407.5
1674	7789.68	1674	7007.97	1674	10874.1	1674	10330.8	1674	15765.8	1674	10867.6	1674	10967.4	1674	10569.6
1675	7859.97	1675	7496.82	1675	10895.4	1675	10447.4	1675	13067.8	1675	10066.3	1675	16247.1	1675	16354.4
1676	7911.8	1676	7096.27	1676	11209.8	1676	11278.6	1676	16188.4	1676	12257.7	1676	12727.2	1676	12446.2
1677	7317.87	1677	6729.34	1677	10700.3	1677	10377.1	1677	14424.5	1677	10956.2	1677	14219.5	1677	14211.9
1678	6445.21	1678	7049.8	1678	9714.14	1678	10131.7	1678	15413.6	1678	13049.6	1678	13992.4	1678	12480.5
1679	6338.66	1679	7134.31	1679	9013.93	1679	8842.61	1679	15929.4	1679	13241.9	1679	16653.2	1679	14059.1
1680	6449.09	1680	7696.25	1680	7254.2	1680	5988.58	1680	15347.9	1680	13318.1	1680	15824.1	1680	13489.8
1681	5902.84	1681	7476.44	1681	5798.56	1681	5005.15	1681	15027	1681	12771.2	1681	16315.7	1681	13886.4
1682	7724.53	1682	8746.49	1682	4579	1682	5334.68	1682	13049.6	1682	9916.28	1682	16713.3	1682	12800.2
1683	8893.3	1683	9948.81	1683	4896.06	1683	6005.88	1683	14585.7	1683	12893.7	1683	16076.1	1683	12640.5
1684	9193.6	1684	9713.84	1684	6412.23	1684	7026.12	1684	13735.7	1684	13502.9	1684	15867.7	1684	10494.5
1685	9316.49	1685	9088.97	1685	7169.19	1685	6952.96	1685	16925.2	1685	17525	1685	15338.1	1685	11262.1
1686	8302.95	1686	7849.72	1686	7113.42	1686	5901.12	1686	17065.5	1686	17460	1686	14383.1	1686	10218.1
1687	9110.93	1687	9270.31	1687	5640.94	1687	4569.92	1687	15360.1	1687	16446.5	1687	13168	1687	10329.4
1688	8303.44	1688	7970.25	1688	4559.8	1688	4110.12	1688	18130.4	1688	16393.7	1688	12316.2	1688	11195.4
1689	8726.27	1689	8522.63	1689	3554.83	1689	3941.34	1689	18448.8	1689	15371.6	1689	12650.1	1689	12207.5
1690	7971.37	1690	7578.51	1690	4349.3	1690	4985.14	1690	17610.1	1690	14942.7	1690	13987.6	1690	13984.7
1691	7644.27	1691	7372.55	1691	3011.69	1691	3506.47	1691	17333.9	1691	14121.1	1691	15688.2	1691	14442.2
1692	7462.14	1692	6806.77	1692	4038.89	1692	4801.67	1692	16884.3	1692	15469.3	1692	13607.9	1692	12883.1
1693	6759.48	1693	5977.33	1693	3747.59	1693	4370.88	1693	18426.4	1693	16992.9	1693	14048.4	1693	13087.8
1694	6527.97	1694	5283.97	1694	6021.7	1694	6364.99	1694	17599.3	1694	15330	1694	11991.3	1694	11169.5
1695	6895.78	1695	5753.64	1695	6929.85	1695	6425.14	1695	16113.3	1695	13660.7	1695	11303.4	1695	9452.66
1696	5623.12	1696	6795.31	1696	6613.71	1696	6067.29	1696	13335.8	1696	9476.94	1696	13143.6	1696	12075.6
1697	6004.87	1697	5559.55	1697	6097.27	1697	5991.14	1697	11672.4	1697	7908.88	1697	11593.8	1697	9914.98
1698	7492.87	1698	6317.9	1698	5957.7	1698	6611.86	1698	12056.9	1698	9336.47	1698	11945.6	1698	10487.2
1699	8258.12	1699	6298.33	1699	6940.25	1699	7688.87	1699	12226.8	1699	9187.92	1699	13325.5	1699	10763.8
1700	8562.07	1700	6664.79	1700	7455.96	1700	7637.15	1700	13119.6	1700	12636.7	1700	15583.2	1700	12210.1
1701	8926.5	1701	7238.75	1701	6833.94	1701	6406.17	1701	13776.7	1701	13260.1	1701	15150.2	1701	12175.6
1702	8578.34	1702	6326.49	1702	7321.55	1702	6439.05	1702	14017.7	1702	14955.4	1702	16608.4	1702	12932.9
1703	9099.54	1703	7435.14	1703	7935.48	1703	7036.53	1703	14301.3	1703	14229.1	1703	16221.4	1703	13705.9
1704	8902.25	1704	7365.13	1704	8455.48	1704	6566.71	1704	15874.8	1704	14484.9	1704	15132.2	1704	12911.9
1705	9091.69	1705	7119.93	1705	10758.2	1705	8082.26	1705	17610.3	1705	15901	1705	15825.3	1705	13782.5
1706	8283.92	1706	6880.87	1706	11495.1	1706	11204	1706	17841.6	1706	15765.5	1706	15062.3	1706	13699.1
1707	9272.56	1707	6806.88	1707	8243.69	1707	9697.24	1707	16502.6	1707	14295.1	1707	14085.7	1707	12449
1708	10027.5	1708	7655.26	1708	4545.55	1708	4903.05	1708	16284.2	1708	16815.4	1708	13331.2	1708	11661.6
1709	10596.9	1709	8647.92	1709	6112.52	1709	6941.68	1709	15944.6	1709	18886	1709	12850.8	1709	11179.3
1710	11600.2	1710	9811.03	1710	4899.94	1710	4322.25	1710	16064.9	1710	17926.6	1710	12989	1710	11141.5
1711	12160	1711	9751.59	1711	5711.49	1711	4664.21	1711	16101.4	1711	16349.8	1711	13933.9	1711	10949.8
1712	12618	1712	9243.84	1712	5345.79	1712	4013.41	1712	15888	1712	14780.9	1712	14563	1712	11497.8
1713	12616.5	1713	9405.44	1713	6941.47	1713	5140.17	1713	15252.4	1713	13926.5	1713	15098	1713	11755.5
1714	11886	1714	9697.48	1714	8392.23	1714	7330.84	1714	18096.8	1714	16451.3	1714	16789.5	1714	12944.8
1715	11028.6	1715	10045.8	1715	11832.4	1715	9797.07	1715	18068.9	1715	16216.4	1715	16134.5	1715	11935.5
1716	10325.5	1716	10165	1716	13477.3	1716	11886.7	1716	17073.2	1716	14469.2	1716	15007.7	1716	12713
1717	10612.8	1717	9770.39	1717	13894.8	1717	12791.1	1717	18589.1	1717	22547.2	1717	15226.3	1717	12579
1718	11293.9	1718	9043.92	1718	13462.5	1718	12430.6	1718	16568.4	1718	17564.5	1718	15829.5	1718	13204.6
1719	11194.1	1719	8756.34	1719	13485.3	1719	11898.2	1719	15593.8	1719	16145.7	1719	15289.3	1719	13385.1
1720	10952.4	1720	9074.1	1720	13679.7	1720	12246.6	1720	16809.5	1720	17079.4	1720	14574.3	1720	12997.9
1721	10484.5	1721	9823.95	1721	12630.1	1721	9781.6	1721	16116.2	1721	17003.2	1721	14693.1	1721	15443.8
1722	11203.5	1722	10040	1722	13174.9	1722	10461.5	1722	15773.7	1722	15916.6	1722	15070.3	1722	14832.1
1723	12571.5	1723	10245.5	1723	9501.8	1723	6909.63	1723	18081.4	1723	16950.6	1723	12900.7	1723	11448.4
1724	13195.2	1724	10876.4	1724	7819.77	1724	6505.47	1724	18213.3	1724	18325.2	1724	13630.2	1724	11526.3
1725	13263.8	1725	11235.9	1725	8603.63	1725	7163.18	1725	17627.9	1725	17323.3	1725	13727.9	1725	11403.8
1726	13039	1726	10607.8	1726	8009.94	1726	7600.05	1726	16694.5	1726	16357.7	1726	11678.7	1726	10523.6
1727	14402.2	1727	11183.8	1727	6706.82	1727	6354.43	1727	18167.4	1727	18281.3	1727	11775.4	1727	11894.9
1728	10678.7	1728	8170.58	1728	6182.67	1728	5970.53	1728	17838.1	1728	17421.3	1728	11078.6	1728	10178.7
1729	11368.5	1729	9710.19	1729	4347.71	1729	3576.76	1729	17224.4	1729	15781.8	1729	12284.3	1729	10922.8
1730	10879.4	1730	8465.97	1730	3468.69	1730	2444.34	1730	13351.8	1730	11672.1	1730	11583.6	1730	9921.32
1731	10864	1731	8722.04	1731	943.113	1731	602.013	1731	11230.7	1731	10833.5	1731	12164.9	1731	10945.2
1732	12033.3	1732	10213.2	1732	568.23	1732	574.839	1732	8026.82	1732	10785.8	1732	13199.2	1732	11971.9
1733	13906.3	1733	11337.6	1733	1251.35	1733	1924.55	1733	7486.69	1733	8720.23	1733	12927	1733	10705.6
1734	14113.8	1734	10935	1734	470.152	1734	722.206	1734	7054.58	1734	8039.69	1734	13809.7	1734	11828.1
1735	13112.6	1735	9891.53	1735	3152.21	1735	4148.81	1735	6069.56	1735	7496.77	1735	13349.8	1735	11861.6
1736	11008.8	1736	7634.92	1736	6193.34	1736	7889.45	1736	6654.1	1736	9060.06	1736	15188	1736	14010.3
1737	9449.56	1737	5494.22	1737	9326.76	1737	12230.3	1737	6156.21	1737	7810.95	1737	16118.5	1737	12994.1
1738	8792.18	1738	5106.78	1738	14382.8	1738	18125.3	1738	4989.59	1738	6949.06	1738	12037.8	1738	9518.78
1739	10311.6	1739	6742.41	1739	18224	1739	21582.3	1739	4757.34	1739	6162.25	1739	14405.6	1739	10972.7
1740	10955.6	1740	8641.24	1740	19101.6	1740	18211.5	1740	4615.79	1740	4501.48	1740	14564.7	1740	11559.7
1741	12557	1741	9824.22	1741	18671.1	1741	18954.5	1741	4316.02	1741	5750.72	1741	14639.8	1741	10914
1742	12554.5	1742	10716.1	1742	13851.1	1742	11287.8	1742	3935.49	1742	5053.14	1742	14222.5	1742	8428.27
1743	10549.9	1743	10186.6	1743	11981.6	1743	10290.6	1743	5154.16	1743	5078.13	1743	8298.36	1743	4474.58
1744	9345.98	1744	8262.22	1744	11251.4	1744	10790.9	1744	6323.54	1744	7402.8	1744	8844.18	1744	5313.1
1745	8397.12	1745	7739.69	1745	10728.4	1745	10045.3	1745	6814.24	1745	7887.71	1745	11759.3	1745	8080.98
1746	7442.22	1746	6896.7	1746	9234.15	1746	8211.64	1746	6774.89	1746	7826.71	1746	9681.98	1746	7942.4
1747	6792.22	1747	6074.91	1747	9817.71	1747	9692.06	1747	6030.18	1747	7356.86	1747	12387.8	1747	9715.4
1748	5258.24	1748	4467.38	1748	10702.3	1748	9981.81	1748	6379.5	1748	8470.9	1748	8257.33	1748	6580.51
1749	5108.57	1749	4403.04	1749	11062.9	1749	10826	1749	7501.22	1749	9001.18	1749	9794.25	1749	7591.45
1750	6085.44	1750	4085.04	1750	11745.3	1750	12436.2	1750	4612.85	1750	5429.42	1750	10453.3	1750	8657.47
1751	6042.52	1751	3811.25	1751	10836.8	1751	11114.3	1751	5859.27	1751	6164.42	1751	5925.95	1751	5892.39
1752	5474.75	1752	3881.76	1752	10863.8	1752	10478.5	1752	5886.29	1752	7356.98	1752	8892.88	1752	7566.56
1753	5119.76	1753	3792.52	1753	9946.95	1753	9569.05	1753	6397.62	1753	8145.02	1753	8317.44	1753	7781.94
1754	5668.12	1754	4438.24	1754	9153.97	1754	9608.17	1754	9254.78	1754	11061.5	1754	10089.5	1754	7864.92
1755	5918.3	1755	4558.47	1755	8516.5	1755	9426.09	1755	7270.51	1755	8040.27	1755	11505.8	1755	9033.99
1756	5844.8	1756	4335.23	1756	8387.19	1756	9409.95	1756	5523.14	1756	5237.84	1756	13395.6	1756	9612.47
1757	5396.48	1757	4158.89	1757	8584.31	1757	9406.28	1757	6420.91	1757	5434.43	1757	17830	1757	13713.7
1758	6066.24	1758	4126.33	1758	11423.8	1758	12063.4	1758	4876.7	1758	4266.8	1758	17378.1	1758	13597.1
1759	6374.61	1759	4122.31	1759	10506.8	1759	11219.9	1759	5864.6	1759	6194.28	1759	17594.4	1759	14433
1760	6857.53	1760	4546.93	1760	11858.4	1760	12433.7	1760	6084.24	1760	6968.55	1760	15877.3	1760	12027.1
1761	5949.07	1761	4088.7	1761	11585.3	1761	11586.7	1761	6942.6	1761	8217.89	1761	17530.1	1761	13132.7
1762	6261.1	1762	4056.86	1762	13685.3	1762	14413.6	1762	7080.86	1762	8925.83	1762	16117.7	1762	12626.7
1763	6030.52	1763	3827.25	1763	12891	1763	14699.2	1763	8550.91	1763	8993.06	1763	16398.6	1763	12970.8
1764	7619.08	1764	4719.33	1764	14687.3	1764	17294.2	1764	9367.92	1764	9244.99	1764	18036.1	1764	14613.2
1765	6727.8	1765	4229.73	1765	12867.4	1765	14742.8	1765	9532.07	1765	9463.11	1765	18932.2	1765	14959.7
1766	6701.22	1766	4500.04	1766	10660.9	1766	10538.1	1766	8692.59	1766	7338.7	1766	20920.7	1766	16847.7
1767	6785.58	1767	4949.41	1767	9408.33	1767	8688.25	1767	9440.57	1767	9548.58	1767	21502.3	1767	17753.3
1768	5726.89	1768	4241.47	1768	9962.63	1768	8859.38	1768	10394.9	1768	10031.6	1768	21208.8	1768	16793
1769	5628.68	1769	4270.24	1769	10467.8	1769	9202.55	1769	11270.4	1769	11279.1	1769	20719.9	1769	15209.1
1770	5502.73	1770	3576.63	1770	11093.6	1770	10261.7	1770	12102.8	1770	11637.4	1770	21439.8	1770	14478.7
1771	8094.64	1771	4838.87	1771	12757.1	1771	13104.8	1771	11497.3	1771	10921.3	1771	20382	1771	14945.1
1772	9303.36	1772	6594.09	1772	12471.9	1772	13424.8	1772	11808.2	1772	12026.3	1772	19586.6	1772	16801
1773	10472.3	1773	7685.82	1773	12340.4	1773	11660.2	1773	11151.6	1773	11756.2	1773	18178.6	1773	15638
1774	10612.4	1774	7785.35	1774	11043.2	1774	9884.98	1774	12130.5	1774	12285	1774	17939.4	1774	16377.6
1775	11498	1775	8943.24	1775	11092	1775	9853.07	1775	12544.1	1775	12253.8	1775	19221.1	1775	15802.8
1776	11695.1	1776	8559.85	1776	11656.6	1776	10418	1776	13186.9	1776	12950.5	1776	18383.7	1776	14553.9
1777	11608	1777	8182.22	1777	13282.6	1777	13209.9	1777	13758.8	1777	12060.4	1777	18036.5	1777	15236.3
1778	13198.2	1778	9902.74	1778	13620.9	1778	12503.9	1778	12751.3	1778	12317.5	1778	16052.5	1778	13374.7
1779	11740	1779	10099.4	1779	16624.7	1779	14279.5	1779	12222.2	1779	11453.6	1779	15917.4	1779	13486.8
1780	10985.3	1780	9625.8	1780	17922.5	1780	15419.8	1780	10713.5	1780	11178.5	1780	14933.7	1780	12016.2
1781	11863.5	1781	9683.11	1781	17537.5	1781	15429	1781	11260.4	1781	11362.5	1781	14844.6	1781	11327.6
1782	11363.2	1782	8316.39	1782	16472.2	1782	15549.4	1782	11781	1782	11789.1	1782	12530.6	1782	9477.25
1783	10339.7	1783	6687.62	1783	16998.7	1783	16481.2	1783	11441.7	1783	11366.1	1783	10973.5	1783	9345.53
1784	9980.44	1784	6464.61	1784	14054.6	1784	14719.2	1784	12073.2	1784	12706.1	1784	10918.4	1784	8303.96
1785	10554.7	1785	7784.77	1785	11476.6	1785	11771	1785	11672.1	1785	12765.2	1785	10883.7	1785	7836.84
1786	10631	1786	7865.75	1786	11894	1786	13353	1786	11312	1786	12393.8	1786	11762.8	1786	8057.64
1787	10756.6	1787	7709.78	1787	11501.3	1787	12678.8	1787	11186.2	1787	12508.2	1787	11797.1	1787	9213.01
1788	9124.81	1788	6436.31	1788	12086.7	1788	11446.1	1788	10050.4	1788	11367.9	1788	11484.1	1788	8498.3
1789	7983.71	1789	5366.71	1789	12596.9	1789	11259.8	1789	10056.5	1789	10314.3	1789	11788.4	1789	8689.43
1790	9079.31	1790	6223.59	1790	13031.4	1790	12199.8	1790	10014.8	1790	10083.7	1790	11916	1790	9515.55
1791	8364.06	1791	5299.13	1791	12688	1791	12092.4	1791	13195.5	1791	11812.4	1791	12849.3	1791	9869.4
1792	9133.18	1792	5842.89	1792	12675.7	1792	11598.9	1792	13283.5	1792	11809.6	1792	13684.2	1792	10510.6
1793	9512.11	1793	6068.03	1793	11179.5	1793	11499.3	1793	17511.1	1793	15060.3	1793	14352.8	1793	10467.5
1794	9637.49	1794	7404.44	1794	11431.8	1794	10462.1	1794	16167.3	1794	14051.4	1794	14867.5	1794	11482.1
1795	9105.86	1795	6951.47	1795	11197.6	1795	7517	1795	14942.5	1795	13055	1795	13267.4	1795	9992.15
1796	8768.88	1796	6628.47	1796	8393.51	1796	6371.44	1796	15925.3	1796	13541.9	1796	12665.2	1796	10772.5
1797	8953.15	1797	6183.76	1797	7392.55	1797	4877.95	1797	18027.2	1797	16809.8	1797	11080.5	1797	9661.64
1798	9096.46	1798	7168.88	1798	5702.42	1798	4538.12	1798	17004.4	1798	14170.3	1798	10307	1798	8567.89
1799	9642.87	1799	6855.41	1799	5111.5	1799	3895.2	1799	16112.9	1799	13136	1799	9087.35	1799	7899.95
1800	9355.07	1800	6890.78	1800	6556.14	1800	6252.88	1800	20612.8	1800	16746	1800	8324.28	1800	7342.74
1801	9374.45	1801	8063.62	1801	7110.14	1801	6479.58	1801	16835.1	1801	13622.8	1801	7630.2	1801	6692.56
1802	8943.8	1802	7606.37	1802	6741.96	1802	8238.45	1802	19666.2	1802	17415.7	1802	6647.65	1802	6378.89
1803	8551.48	1803	8253.34	1803	6372.35	1803	6727.99	1803	19861.8	1803	17967.5	1803	7203.69	1803	6677.72
1804	8119.52	1804	7669.07	1804	7198.69	1804	7437.5	1804	19588.1	1804	18348.3	1804	6532.74	1804	7212.6
1805	7384.89	1805	6421.31	1805	8149.72	1805	8162.56	1805	18284.4	1805	18423.1	1805	4887.42	1805	5485.64
1806	9703.79	1806	6712.95	1806	6004.19	1806	6767.52	1806	17341.1	1806	17841.8	1806	4798.93	1806	5135.33
1807	6859.18	1807	4299.07	1807	7747.43	1807	9632.85	1807	17242.7	1807	15746.4	1807	4461.8	1807	4885.67
1808	5121.23	1808	3249.54	1808	11132.8	1808	12726.1	1808	17159.1	1808	14986.4	1808	4445.31	1808	4446.11
1809	4651.68	1809	3516.68	1809	9770.02	1809	10179.1	1809	21232	1809	17513.6	1809	4044.93	1809	3877.3
1810	4762.01	1810	3278.98	1810	9318.71	1810	7829.07	1810	19131.5	1810	15765	1810	5404.33	1810	4444.27
1811	4553.34	1811	3704.01	1811	6890.6	1811	6529.23	1811	18403	1811	15705.3	1811	5720.7	1811	4495.94
1812	4835.63	1812	4450.64	1812	6292.72	1812	7059.32	1812	20055.5	1812	18233.3	1812	6705.1	1812	6056.6
1813	4830.73	1813	4896.25	1813	5697.89	1813	5866.86	1813	20720.5	1813	17603.2	1813	7822.41	1813	6404.62
1814	3971.49	1814	3784.84	1814	6303.51	1814	6942.42	1814	21978.9	1814	19189.7	1814	8231.73	1814	6333.35
1815	3846.08	1815	2685.61	1815	7554.48	1815	7608.42	1815	23586	1815	19231.7	1815	8562.3	1815	6791.77
1816	4131.54	1816	3151.37	1816	7765.35	1816	7477.18	1816	23038.7	1816	19006.7	1816	10161.4	1816	8051.66
1817	5545.76	1817	4480.61	1817	9486.37	1817	8731.78	1817	22754.7	1817	19085.2	1817	9831.33	1817	8131.64
1818	5340.77	1818	4199.39	1818	9526.15	1818	9049.24	1818	21363.3	1818	16905.3	1818	10422.9	1818	9090.66
1819	5123.18	1819	4194.88	1819	10221.7	1819	9556.53	1819	19503.6	1819	16511.5	1819	11560.6	1819	11212.1
1820	9265.52	1820	7983.65	1820	10268.9	1820	9279.76	1820	16305.4	1820	12275.9	1820	11098.2	1820	10405.8
1821	8381	1821	7506.05	1821	9410.77	1821	8391.45	1821	16895.3	1821	13945.8	1821	10560.8	1821	9234.71
1822	9335.25	1822	7856.97	1822	10170.4	1822	8572.54	1822	11475.1	1822	9598.04	1822	10757.4	1822	9679.65
1823	10146.5	1823	8531.56	1823	9681.64	1823	8693.4	1823	7717.75	1823	7896.34	1823	11030.4	1823	9658.4
1824	10186.3	1824	9379.9	1824	9534.63	1824	8512.43	1824	9968.06	1824	9596.15	1824	11223.1	1824	8233.23
1825	10631.6	1825	9508.84	1825	9581.89	1825	8772.83	1825	6244.94	1825	7505.97	1825	11299	1825	9068.05
1826	9904.65	1826	9946.98	1826	10404.8	1826	9297.77	1826	9576.95	1826	8240.21	1826	11007.5	1826	9043.31
1827	8828.11	1827	9706.89	1827	9826.94	1827	9434.63	1827	9315.5	1827	11021.3	1827	11208.4	1827	9966.98
1828	5952.01	1828	6674.65	1828	9483.64	1828	8794.68	1828	10365.2	1828	13084.6	1828	10355.3	1828	9435.21
1829	5530.31	1829	5615.04	1829	8689.96	1829	8264.24	1829	11470	1829	15591.8	1829	8501.5	1829	8029.92
1830	5915.43	1830	5689.62	1830	7567.69	1830	7412.76	1830	12350.3	1830	15245	1830	8343.17	1830	7340.79
1831	5825.44	1831	6378.04	1831	6992.32	1831	7148.74	1831	12362.5	1831	15022.8	1831	8016.77	1831	6892.25
1832	5574.23	1832	5320.17	1832	6819.2	1832	6892.23	1832	11928.9	1832	14278.1	1832	7839.96	1832	5912.52
1833	5710.69	1833	5110.73	1833	8769.96	1833	7145	1833	11434.1	1833	13360.2	1833	8792.44	1833	6585.87
1834	8178.56	1834	5623.51	1834	9488.03	1834	7722.24	1834	13106.4	1834	14974.7	1834	7943.16	1834	5465.48
1835	8252.63	1835	5874.12	1835	7810.3	1835	6346.23	1835	11909.5	1835	12239.3	1835	8581.51	1835	6484.15
1836	10743	1836	8472.45	1836	8550.1	1836	6703.5	1836	12766.4	1836	12110.3	1836	9630.82	1836	7467.14
1837	7763.86	1837	6968.17	1837	8996.12	1837	7480.45	1837	13826.8	1837	12520.1	1837	9441.32	1837	7197.77
1838	5715.47	1838	4612.45	1838	8868.59	1838	7619.15	1838	13814.1	1838	13226.6	1838	8694.85	1838	7512.45
1839	5986.83	1839	4656.51	1839	9780.68	1839	8237.51	1839	13912.4	1839	14813.7	1839	7358.49	1839	6070.72
1840	5973.39	1840	4479.58	1840	11452.7	1840	8903.87	1840	12640.5	1840	13486.6	1840	6575.25	1840	5805.15
1841	6056.4	1841	4158.73	1841	12617	1841	10417.1	1841	12598.2	1841	12693.3	1841	6029.45	1841	4977.61
1842	6686.08	1842	4555.8	1842	11687.6	1842	10037.5	1842	11706.3	1842	12158.5	1842	5371.14	1842	4718.29
1843	7540.68	1843	5768.78	1843	12372	1843	9988.3	1843	11422.8	1843	11322.9	1843	6769.43	1843	5529.27
1844	7695	1844	6173.73	1844	15039.1	1844	11942.2	1844	10987.5	1844	10606.8	1844	7661.98	1844	6670.92
1845	7291.61	1845	6515.4	1845	15345.9	1845	13962.7	1845	9301.67	1845	8238.3	1845	7884.16	1845	7530.35
1846	8104.78	1846	7250.94	1846	11448.8	1846	7415.33	1846	8838.74	1846	10521.9	1846	6734.46	1846	7802.36
1847	7092.05	1847	6275.59	1847	6900.61	1847	6065.43	1847	7692.91	1847	9975.17	1847	5321.56	1847	5921.55
1848	6474.61	1848	6479.57	1848	8024.09	1848	6334.31	1848	7358.43	1848	9912.75	1848	6133.6	1848	6005.15
1849	5840.93	1849	5556.17	1849	4474.15	1849	4096.59	1849	6919.27	1849	8842.72	1849	6376.07	1849	6379.68
1850	4926.33	1850	3697.03	1850	3999.44	1850	4393.84	1850	6495.01	1850	8303.7	1850	9220.07	1850	7700.84
1851	5184.28	1851	3757.31	1851	3009.56	1851	2716.95	1851	6633.27	1851	8434.36	1851	11571.8	1851	8878.06
1852	4531.64	1852	2888.59	1852	3501.42	1852	4184.56	1852	7193.83	1852	8407.4	1852	15466.7	1852	12491.8
1853	5086.09	1853	3219.02	1853	5242.86	1853	5631.04	1853	8144.46	1853	8840.52	1853	17132	1853	15185.6
1854	5511.09	1854	3687.4	1854	6989.07	1854	7119.57	1854	8938.51	1854	9742.22	1854	16271.4	1854	13747.4
1855	5016.6	1855	2745.77	1855	8442.58	1855	8632.09	1855	9652.36	1855	10668.9	1855	15575.7	1855	12765
1856	5522.19	1856	3981.82	1856	10076.3	1856	9641.61	1856	7902.81	1856	10567.5	1856	13709.6	1856	12735.2
1857	6634.46	1857	4556.96	1857	11000.2	1857	10016.6	1857	8216.34	1857	10765.1	1857	14306	1857	12793.5
1858	6564.23	1858	4832.14	1858	10998.3	1858	8956.16	1858	7993.57	1858	11214.2	1858	13647.3	1858	11712.9
1859	8129.7	1859	5893.36	1859	10190.2	1859	8441.22	1859	4638.39	1859	9612.64	1859	12662.4	1859	9436.67
1860	8639.49	1860	6951.99	1860	7929.91	1860	6680.88	1860	6182.23	1860	10591.7	1860	12853.4	1860	10202.7
1861	9217.88	1861	6236.15	1861	6101.43	1861	5629.18	1861	6745.94	1861	9403.29	1861	11293.9	1861	8605.71
1862	9039.5	1862	7106.05	1862	4985.63	1862	5188.48	1862	4772.82	1862	7157.78	1862	14633.4	1862	12314.9
1863	8820.7	1863	7313.26	1863	4789.66	1863	5236.99	1863	6447.59	1863	9412.97	1863	14264.1	1863	13001.7
1864	9678.3	1864	7342.68	1864	5084.43	1864	5234.05	1864	4306.43	1864	6873.9	1864	14286.5	1864	12654.6
1865	9037.72	1865	6881.65	1865	5020.93	1865	4351.31	1865	5220.7	1865	6795.5	1865	14104.2	1865	11500.7
1866	7743.1	1866	6470.99	1866	4951.44	1866	3592.75	1866	6805.54	1866	6931.29	1866	17974.4	1866	12127.4
1867	6550.21	1867	5419.1	1867	4962.85	1867	3996.72	1867	4164.4	1867	5758.93	1867	21752.4	1867	15226.6
1868	7658.51	1868	6467.41	1868	6375.97	1868	6142.78	1868	6242.93	1868	7017.65	1868	21079.4	1868	14585.3
1869	6090.01	1869	5038.57	1869	7717.56	1869	7087.78	1869	3906.25	1869	6006.51	1869	28020	1869	15866
1870	7186.51	1870	5826.05	1870	7257.37	1870	5335.34	1870	5204.18	1870	6854.62	1870	27123.7	1870	16262.5
1871	8392.94	1871	7013.66	1871	5434.42	1871	3522.77	1871	4025.38	1871	4389.43	1871	39939.8	1871	24823
1872	7329.79	1872	6140.66	1872	5704.66	1872	3590.84	1872	6092.86	1872	6763.96	1872	33594.9	1872	20541.8
1873	7974.57	1873	6561.08	1873	5727.78	1873	4293.77	1873	9180.36	1873	9351.32	1873	35384	1873	22942.5
1874	6915.18	1874	5815.59	1874	7646.28	1874	6684.96	1874	10766.6	1874	11351.9	1874	34344.6	1874	24288.6
1875	7657.04	1875	6515.55	1875	10139.8	1875	8858.27	1875	13680.9	1875	15172.1	1875	34036.1	1875	23680.2
1876	8292.56	1876	6173.41	1876	10521.7	1876	9015.58	1876	12995.1	1876	14138	1876	32759.3	1876	24355.7
1877	8877.42	1877	6629.29	1877	10510.4	1877	9829.89	1877	12381.4	1877	13277.9	1877	31200.7	1877	25272.3
1878	9154.72	1878	6852.69	1878	11101	1878	11030.1	1878	12323.4	1878	12491.8	1878	30756	1878	23312.8
1879	9336.46	1879	6999.72	1879	9310.7	1879	9926.1	1879	11316	1879	12108.9	1879	29258.7	1879	22816.5
1880	10556.8	1880	7507.1	1880	7675.35	1880	7836.65	1880	11205.6	1880	11499.4	1880	27201.3	1880	21934.3
1881	10225.6	1881	8042.59	1881	6753.32	1881	7863.08	1881	11096.5	1881	11060.4	1881	23994.7	1881	18887
1882	8057.72	1882	5807.61	1882	6606.43	1882	7548.61	1882	10870.6	1882	10888.1	1882	19670	1882	16485.8
1883	6936.16	1883	4856.01	1883	5096.51	1883	5802.29	1883	11791.8	1883	12571.7	1883	15225.6	1883	12358.9
1884	5948.88	1884	4403.32	1884	4660.69	1884	5106.1	1884	12621.2	1884	13380.8	1884	11336.4	1884	10137.4
1885	5031.55	1885	3475.1	1885	3795.09	1885	3560.26	1885	10723	1885	10431.5	1885	15579.2	1885	12385.4
1886	4085.17	1886	3071.34	1886	3572.53	1886	3761.58	1886	9526.63	1886	8451.98	1886	23416.8	1886	19526.2
1887	4325.98	1887	2927.43	1887	2871.69	1887	3171.76	1887	8267.49	1887	6887.13	1887	25966.6	1887	21148.1
1888	4789.41	1888	3048.17	1888	3890.05	1888	4889.29	1888	8310.37	1888	6122.05	1888	29289.1	1888	24559.9
1889	4431.45	1889	3049.06	1889	3957.57	1889	3552.12	1889	6974.02	1889	5437.38	1889	32671.3	1889	28761.1
1890	4565.23	1890	2540.05	1890	2812.19	1890	2449.11	1890	5742.43	1890	6147.27	1890	36674.9	1890	33867.3
1891	4708.88	1891	2854.3	1891	2842.19	1891	2845.21	1891	6254.6	1891	7039.53	1891	40232.5	1891	38965.3
1892	4621.37	1892	2685.55	1892	3454.11	1892	4019.22	1892	5910.28	1892	7267.45	1892	41714.5	1892	40105.4
1893	4034.9	1893	2411.95	1893	3021.9	1893	2974.49	1893	5995.43	1893	6926.99	1893	41737	1893	38364.6
1894	4048.84	1894	2897.47	1894	3307.33	1894	3238.85	1894	5338.13	1894	6406.58	1894	39891.2	1894	35080.7
1895	4415.5	1895	3109.21	1895	4174.52	1895	2840.73	1895	6214.8	1895	7486.23	1895	46721.2	1895	36721.6
1896	4542.77	1896	3289.23	1896	5054.22	1896	3776.4	1896	5330.83	1896	6921.38	1896	43173.3	1896	32908.7
1897	4962.29	1897	3336.17	1897	5914.87	1897	4285.84	1897	5937.95	1897	7529.45	1897	42515	1897	32164
1898	5216.53	1898	3605.49	1898	7310.84	1898	5498.54	1898	5218.75	1898	6308.33	1898	39441.8	1898	26729.1
1899	6381.51	1899	3947.4	1899	6583.32	1899	4912.09	1899	5521.32	1899	6906.43	1899	37962.9	1899	25538.3
1900	7422.9	1900	5250.13	1900	8016.73	1900	6748.92	1900	6228.68	1900	7729.14	1900	36736	1900	23042.1
1901	8329.54	1901	5496.15	1901	6304.02	1901	4995.7	1901	6495.99	1901	8602.21	1901	34537.9	1901	23773
1902	8219.96	1902	6000.65	1902	7174.77	1902	6286.76	1902	8503.47	1902	10095.7	1902	32401	1902	23308.5
1903	8287.17	1903	6088.71	1903	8582.45	1903	8060.63	1903	8952.18	1903	10392.9	1903	31061.3	1903	20820.1
1904	7971.24	1904	6580.86	1904	7572.11	1904	6943.49	1904	9535.94	1904	9892.88	1904	31500.8	1904	24562.5
1905	7247.92	1905	5373.61	1905	6769.53	1905	6361.42	1905	10015.9	1905	10645.9	1905	30335.7	1905	28970.9
1906	7020.95	1906	5548.77	1906	6928.69	1906	7431.02	1906	10073.2	1906	9992.6	1906	26858.4	1906	25955
1907	6609.63	1907	4985.76	1907	7452.36	1907	8120.86	1907	8354.14	1907	8971.66	1907	22115	1907	20680.3
1908	6782.85	1908	4469.6	1908	8054.43	1908	6893.99	1908	8542.15	1908	9168.38	1908	15670.3	1908	14852.1
1909	6981.44	1909	4521.16	1909	8765.19	1909	7895.37	1909	8527.72	1909	8560.54	1909	20104.8	1909	19565.4
1910	6689.73	1910	4239.79	1910	7660.3	1910	6029.35	1910	9361.33	1910	9890.76	1910	19517.4	1910	17318.4
1911	5547.85	1911	3168.77	1911	8116.88	1911	6851.41	1911	9655.06	1911	10636.6	1911	18051	1911	15644.7
1912	4846.2	1912	3126.66	1912	7375.92	1912	5903.52	1912	10508.9	1912	12416.3	1912	16543.1	1912	14124.8
1913	4441.54	1913	3391.11	1913	7692.06	1913	6508.94	1913	10093.6	1913	10349.6	1913	18098.5	1913	15688.6
1914	4186.89	1914	3377.72	1914	7765.66	1914	6697.13	1914	9284.28	1914	9499.18	1914	17754	1914	15917.9
1915	5314.9	1915	4154.1	1915	8737.81	1915	7751.95	1915	9128.12	1915	9356.89	1915	18588.3	1915	16279.3
1916	5293.37	1916	3721.63	1916	8820.57	1916	9038.01	1916	8442.86	1916	9012.61	1916	14356.3	1916	13283.6
1917	6219.07	1917	4456.54	1917	8970.34	1917	8882.78	1917	9014.88	1917	9802.45	1917	14913.2	1917	13336.6
1918	6464.86	1918	5296.83	1918	8932.11	1918	9058.63	1918	9554.92	1918	9514.16	1918	14581.4	1918	12823.2
1919	8082.7	1919	6807.36	1919	11040.5	1919	9087.39	1919	9960.83	1919	10783.7	1919	15073	1919	13522.2
1920	8873.44	1920	7601.89	1920	12128.2	1920	10420.9	1920	10416.4	1920	10384	1920	14703.5	1920	13828.6
1921	8360.47	1921	6608.35	1921	13258.4	1921	11863.5	1921	10778.4	1921	11208.4	1921	14369.8	1921	13201.2
1922	6666.77	1922	5188.54	1922	12325.1	1922	12612.3	1922	10765.8	1922	10434.9	1922	12400.7	1922	12239.3
1923	6182.56	1923	5586.02	1923	12622	1923	13438.9	1923	10303.4	1923	10332.4	1923	15016	1923	13780.7
1924	5065.14	1924	4850.31	1924	13885.7	1924	12551	1924	10162.5	1924	10244.1	1924	13995.2	1924	11856.7
1925	6491.06	1925	7207.99	1925	14268.5	1925	12823.1	1925	9928.38	1925	10083.1	1925	13045.7	1925	10177.3
1926	9784.08	1926	10868.4	1926	16157.8	1926	13717.2	1926	9922.6	1926	10875.5	1926	14874.6	1926	12178.1
1927	7648.28	1927	8110.99	1927	16284.6	1927	14639.9	1927	10451	1927	11983.8	1927	16827.4	1927	14475.3
1928	9452.32	1928	7959.25	1928	16529.8	1928	14491.6	1928	9945.15	1928	10089.8	1928	18888.9	1928	17165.5
1929	7867.89	1929	5687.48	1929	16786.7	1929	15562.2	1929	9684.5	1929	11091.7	1929	19734.7	1929	17140.6
1930	6880.55	1930	5035.86	1930	12868.7	1930	11731.7	1930	10395.4	1930	10449.3	1930	21598.1	1930	17424.9
1931	5463.8	1931	4207.35	1931	11377.9	1931	10902.2	1931	9467.07	1931	9505.3	1931	22204.4	1931	18063.7
1932	4754.3	1932	4043.37	1932	10379	1932	8771.66	1932	8315.59	1932	7417.34	1932	20351.9	1932	16986
1933	4724.89	1933	3670.91	1933	7547	1933	5840.28	1933	8548.36	1933	8178.23	1933	20360.8	1933	16460.7
1934	5494.65	1934	4479.83	1934	5841.19	1934	4756.78	1934	7821.12	1934	7057.7	1934	22111.8	1934	17856.9
1935	4380.63	1935	3969.27	1935	4642.66	1935	3898.02	1935	8534.84	1935	7871.95	1935	24785.9	1935	18908
1936	7808.58	1936	7146.22	1936	6994.93	1936	5777.24	1936	8166.84	1936	7658.76	1936	27785.5	1936	20554.4
1937	7167.45	1937	6449.07	1937	6542.17	1937	5572.33	1937	7086.44	1937	7087.07	1937	28390.3	1937	21422.7
1938	5675.14	1938	5195.32	1938	6174.47	1938	5251.29	1938	6559.66	1938	6177.76	1938	27656.2	1938	23596.9
1939	6936.54	1939	6243.92	1939	9920.12	1939	8266.19	1939	6172.55	1939	5510.66	1939	25915.9	1939	21245.3
1940	9850.21	1940	6804.62	1940	8055.6	1940	7088.56	1940	6168.91	1940	5803.3	1940	25083.3	1940	20537.3
1941	8558.38	1941	5951.66	1941	8667.07	1941	7439.64	1941	6343.15	1941	5625.88	1941	25392.6	1941	19947.4
1942	9375.9	1942	5417.69	1942	7245.07	1942	6501.72	1942	6714.89	1942	6998.4	1942	24167.6	1942	19767.7
1943	7515.2	1943	4265.21	1943	4784.02	1943	4664.45	1943	6886.1	1943	6066.88	1943	22258.3	1943	16531.1
1944	8032.94	1944	5459.68	1944	4801.06	1944	5196.64	1944	7251.29	1944	7103.54	1944	23127.6	1944	17408.2
1945	8839.45	1945	6356.48	1945	5752.93	1945	6562.9	1945	7336.63	1945	7239.52	1945	22537.4	1945	17774.5
1946	7917.97	1946	5748.83	1946	5428.92	1946	6010.93	1946	6746.65	1946	6872.56	1946	21661.6	1946	17910.3
1947	9497.74	1947	7341.3	1947	4950.21	1947	5550.52	1947	8224.57	1947	7495.45	1947	20627	1947	16627.1
1948	9651.49	1948	7690.92	1948	5618.93	1948	5900.2	1948	8925.56	1948	7757.88	1948	19210.7	1948	15729
1949	8655.13	1949	6132.13	1949	6331.87	1949	6507.24	1949	10210.3	1949	9342.97	1949	17026.3	1949	14460.1
1950	7422.92	1950	5011.72	1950	6450.42	1950	6024.2	1950	12334.7	1950	11759.5	1950	20630.2	1950	15688.2
1951	7238.27	1951	4395.26	1951	7724.54	1951	6762.65	1951	13781.5	1951	11171	1951	18280.3	1951	13860.4
1952	6477.48	1952	3998.67	1952	8494.87	1952	7239.1	1952	13397.4	1952	11007.9	1952	15363.9	1952	10424.9
1953	3788.99	1953	3347.08	1953	8645.29	1953	7286.11	1953	13198.3	1953	11962.7	1953	20209.6	1953	13912.4
1954	5581.91	1954	5798.57	1954	7049.53	1954	5589.2	1954	12505.5	1954	11649.7	1954	15876.2	1954	11022.9
1955	4759.11	1955	4721	1955	5819.59	1955	4812.88	1955	10819.5	1955	10624.6	1955	14879.8	1955	10922.1
1956	4565.23	1956	4324.17	1956	5755.48	1956	6094.26	1956	9996.32	1956	10558.5	1956	14761.2	1956	10174.2
1957	6243.11	1957	4982.3	1957	6463.52	1957	7467.55	1957	9149.37	1957	10993	1957	11338	1957	7360.5
1958	7733.31	1958	5216.33	1958	7056.6	1958	7702.35	1958	7930.95	1958	9735.27	1958	8260.38	1958	6082.77
1959	6212.43	1959	4478.04	1959	6162.29	1959	6697.13	1959	7325.2	1959	8629.96	1959	11599.9	1959	7684.73
1960	6815.92	1960	4557.66	1960	4528.23	1960	5168.64	1960	6785.02	1960	7228.39	1960	8489.72	1960	5976.27
1961	6179.85	1961	4224.31	1961	3525.55	1961	4427.71	1961	6979.51	1961	7578.63	1961	9695.88	1961	5323.38
1962	5455.16	1962	4569.84	1962	2788.07	1962	3987.95	1962	7126.6	1962	7241.57	1962	9231.6	1962	5384.15
1963	5100.47	1963	4887.99	1963	2010.81	1963	3095.56	1963	7971.72	1963	7780.83	1963	14411.5	1963	7394.73
1964	5569.69	1964	5832.06	1964	1272.61	1964	2199.01	1964	8576.38	1964	9107.38	1964	11404.1	1964	5511.09
1965	6035.13	1965	5656.22	1965	1074.71	1965	1886.74	1965	10114.8	1965	9106.44	1965	9786.64	1965	5314.64
1966	6656.1	1966	7811.01	1966	836.408	1966	1264.52	1966	11137	1966	10476.3	1966	15269.6	1966	9673.17
1967	7016.17	1967	7437.49	1967	838.303	1967	1182.55	1967	10630.9	1967	11143	1967	22633.3	1967	16980.2
1968	6009.73	1968	6178.74	1968	864.723	1968	1328.34	1968	11032.6	1968	11303.3	1968	20381.7	1968	16032.7
1969	5743.67	1969	5375.1	1969	2043.98	1969	1914.16	1969	10733.2	1969	10514.9	1969	28593.8	1969	22980.6
1970	6998.09	1970	5885.82	1970	3084.76	1970	2364.51	1970	11972	1970	12863	1970	23372.5	1970	18741.9
1971	6719.46	1971	5613.22	1971	4607.62	1971	4627.84	1971	10930.5	1971	11551.1	1971	27705.9	1971	23903.9
1972	6349.9	1972	4852.02	1972	4853.57	1972	4394.05	1972	10694.2	1972	10411.1	1972	29027.7	1972	25484.1
1973	6969.42	1973	5816.34	1973	6867.11	1973	7085.4	1973	12021.4	1973	10607.4	1973	28247.6	1973	25033.9
1974	6681.86	1974	6381.75	1974	8963.86	1974	9400.08	1974	14235	1974	13723.6	1974	27785.4	1974	24350.5
1975	7111.32	1975	6674.53	1975	8165.58	1975	8558.52	1975	13199.2	1975	15397.2	1975	30884.8	1975	25795.5
1976	8355.66	1976	7334.95	1976	6642.65	1976	7281.67	1976	9967.62	1976	13146	1976	27866.8	1976	23669.4
1977	9065.88	1977	8243.27	1977	5742.31	1977	6561.46	1977	9111.63	1977	11069.3	1977	17613.3	1977	14781.1
1978	9653.43	1978	8703.7	1978	6704.08	1978	7450.77	1978	7063.74	1978	8025.99	1978	13926.5	1978	11735.3
1979	9879.66	1979	8318.34	1979	7462.85	1979	7144.43	1979	6280.46	1979	7240.75	1979	11483.3	1979	11902.5
1980	9653.68	1980	7809.03	1980	7003.43	1980	7526.23	1980	5869.33	1980	6337.78	1980	9874.96	1980	9875.49
1981	7964.79	1981	6727.7	1981	6634.34	1981	7540.59	1981	6380.16	1981	5911.77	1981	8869.61	1981	8679.11
1982	7958.77	1982	6471.19	1982	6768.9	1982	8079.8	1982	6862.94	1982	6375.92	1982	9462.46	1982	9512.88
1983	6825.51	1983	5542.18	1983	6992.01	1983	7677.32	1983	7774.59	1983	7258.92	1983	9206.58	1983	9920.26
1984	7286.63	1984	5304	1984	5962.98	1984	6985.56	1984	9104.76	1984	11192.4	1984	9853.01	1984	11919.8
1985	6509.21	1985	4987.13	1985	5574.48	1985	6718.56	1985	7757.28	1985	9069.58	1985	10243.7	1985	11315.6
1986	5830.19	1986	4929.44	1986	5490.14	1986	6466.05	1986	7279.94	1986	6660.68	1986	12145.3	1986	12789
1987	5458.61	1987	4631.92	1987	5667.42	1987	7065.05	1987	7991.8	1987	8254.81	1987	12745.4	1987	13831.8
1988	6265.64	1988	4582.51	1988	6126.27	1988	7792.27	1988	7715.1	1988	7144.62	1988	13200.8	1988	13959.3
1989	7603.93	1989	5849.31	1989	6079.97	1989	7531.02	1989	7614.42	1989	7041.67	1989	11466.6	1989	11080.8
1990	7727.67	1990	5442.86	1990	6749.14	1990	7964.07	1990	7121.34	1990	7333.58	1990	13247.6	1990	10896.1
1991	8745.2	1991	5159.39	1991	7437.22	1991	8756.94	1991	6548.4	1991	6997.61	1991	12359.3	1991	9806.91
1992	9826.53	1992	6259.15	1992	7754.1	1992	9391.01	1992	8374.6	1992	10188.8	1992	13912.9	1992	12272.5
1993	8261.94	1993	6083.57	1993	8127.63	1993	9404.38	1993	9240.38	1993	9417.69	1993	13298.6	1993	12383.8
1994	7012.26	1994	5212.43	1994	7748.4	1994	8604.94	1994	8872.22	1994	9552.94	1994	13341.8	1994	11365.7
1995	5869.69	1995	4845.52	1995	8040.37	1995	8707.56	1995	8743.17	1995	10222.4	1995	12188	1995	12147.7
1996	7791.32	1996	5266.56	1996	7513.62	1996	7773.08	1996	9851.66	1996	11339.4	1996	13063	1996	13076.4
[truncated: 6,004 more rows]

## Sheet: Q213A
Fluorescence intensity recorded along microtubules for the RFP and GFP channels (as described in Methods) and for indicated RFP- and GFP- tagged proteins .																	Figure 3C
GFP		RFP		GFP		RFP		GFP		RFP		GFP		RFP		Figure 3C
Pixel	Intensity	Pixel	Intensity	Pixel	Intensity	Pixel	Intensity	Pixel	Intensity	Pixel	Intensity	Pixel	Intensity	Pixel	Intensity
0	9056.21	0	7833.81	0	11122	0	10481.8	0	18309.4	0	17698.1	0	7626.41	0	6735.94
1	8809.26	1	7614.46	1	11147.6	1	10697.5	1	20689.3	1	19468.9	1	9213.08	1	8273.65
2	8562.77	2	7243.02	2	11324.3	2	9805.37	2	21704.3	2	19312.5	2	9675.93	2	9266.13
3	8249.89	3	7074.39	3	12451.2	3	10128.5	3	23278.6	3	19958	3	9392.45	3	8741.93
4	8066.09	4	6655.56	4	12132.8	4	9976.28	4	26382.9	4	23362.6	4	8981.62	4	7740.02
5	6931.85	5	4383.39	5	12903.7	5	10792.9	5	22824.4	5	20443.3	5	9049.34	5	9698.75
6	6305.02	6	5797.86	6	13296.3	6	11933.5	6	22656.4	6	21226.2	6	9052.23	6	9678.46
7	7510.16	7	5168.48	7	13242.4	7	11246.3	7	21854.8	7	21081.2	7	9676.99	7	10564.9
8	6038.16	8	4300.35	8	12900.6	8	10940.2	8	29082.9	8	28460.6	8	10677.2	8	11372.8
9	5800.85	9	5703.26	9	12685.9	9	10432.1	9	23882.3	9	23738.6	9	11289.7	9	12086.4
10	5423.96	10	6022.81	10	13185.5	10	9452.27	10	26864.7	10	28731.7	10	10871.5	10	11527.8
11	4448.34	11	5836.31	11	13610.6	11	10787.4	11	24664.5	11	26191.9	11	9963.41	11	8728.96
12	5154.97	12	7157.31	12	14443.3	12	11812.9	12	23534.5	12	24312.8	12	8497.63	12	6807.04
13	6243.48	13	8234.95	13	14717.1	13	12730.5	13	26023.1	13	26213.8	13	10882.8	13	10657.9
14	7534.44	14	8917.42	14	15606	14	13392.4	14	24534.9	14	24576	14	10571.4	14	9843.82
15	8017.47	15	8855.12	15	16345	15	13950.7	15	24477	15	23816.9	15	10552.1	15	9545.31
16	7400.57	16	8670.77	16	17572.4	16	14932.2	16	26699.7	16	25574	16	12378.8	16	10577.8
17	5115.7	17	6368.85	17	18469.9	17	15562	17	25132.2	17	24085.8	17	11177.2	17	9194.19
18	5459.86	18	5748.25	18	19359.8	18	15977	18	23660.9	18	21850.8	18	12722.1	18	10445.6
19	4801.05	19	5271.74	19	19122.3	19	16179.5	19	23256.8	19	20055.9	19	13495.1	19	12677
20	4571.44	20	4756.75	20	20429.1	20	18193.8	20	23805.7	20	20742.3	20	15059.1	20	14057.2
21	5341.38	21	5828.48	21	20952.2	21	18263.7	21	24921.4	21	21782.4	21	17221.1	21	13104.1
22	5637.86	22	5346.37	22	21343.2	22	18180.5	22	38060.3	22	36053.3	22	17197.8	22	13181.7
23	6749.92	23	6461.58	23	20189.8	23	15958.7	23	33279.1	23	30640.8	23	16160.9	23	15186.6
24	7608.93	24	9698.32	24	19998.7	24	16113.6	24	30973.7	24	28095.1	24	13208.6	24	12693.2
25	9689.37	25	14606.4	25	19332.6	25	15238	25	35232.8	25	32702.5	25	9449.18	25	7892.08
26	11510.2	26	17713.7	26	19182	26	14656	26	35076.7	26	31946.5	26	8234.51	26	6744.56
27	13033.9	27	17804.8	27	14252.7	27	9336.94	27	34171	27	30835.9	27	8238.18	27	7026.9
28	13759.6	28	15756.5	28	15120.7	28	11033.1	28	37237.1	28	34563.1	28	7716.14	28	6483.02
29	13093.5	29	12142.4	29	14792.8	29	10866.1	29	38278.3	29	36681.4	29	8220.45	29	6856.34
30	13687.5	30	11597.4	30	15001.2	30	12277	30	35324.6	30	33619.4	30	7144.88	30	6980.89
31	13287.7	31	12032.8	31	14750.1	31	12937	31	37914.5	31	36764.6	31	7227.94	31	7034.53
32	13104.1	32	12485.2	32	15184.1	32	12133.7	32	40808.6	32	39049.1	32	5880.94	32	5710.48
33	11396.4	33	11285.6	33	15717.7	33	12001.5	33	41205.8	33	38617.2	33	5592.29	33	3874.88
34	9884.94	34	11096.5	34	16199.3	34	13879	34	41151.4	34	38380.5	34	4438.45	34	3221.08
35	10622.6	35	11404.1	35	17195.4	35	14948.2	35	42301.7	35	38127.3	35	5372.97	35	3713.81
36	10789.7	36	10804.5	36	16974.4	36	15638.3	36	41610.8	36	37340.9	36	4411.84	36	2994.03
37	11105.7	37	10871.6	37	17685.6	37	16064.1	37	44543.6	37	38956	37	3935.55	37	2415
38	9668.68	38	10502.9	38	19206.7	38	16816.4	38	44595.1	38	38778.4	38	3977.11	38	2221.92
39	8212.36	39	9591.82	39	19894.1	39	17627.9	39	45410.5	39	41088.6	39	3644.78	39	2535.97
40	9245.5	40	10486.3	40	21631.4	40	20368.1	40	44904.8	40	40942.9	40	3698.22	40	3045.2
41	10428	41	10932.9	41	22708.6	41	22019.4	41	45557.9	41	40304.7	41	4398.1	41	4545.45
42	9470.86	42	10360	42	21479.9	42	20741.7	42	42699.8	42	36594.5	42	4709.56	42	4862.85
43	8349.16	43	9371.04	43	24069.3	43	23934.1	43	36996.1	43	29941	43	6626.06	43	4941.54
44	14613.4	44	14685.3	44	24973.1	44	25024.5	44	41702.7	44	37711	44	7471.73	44	5719.87
45	11323.6	45	11709.3	45	24872.7	45	25697.6	45	36896.6	45	32785.2	45	9765.84	45	9308.78
46	12289	46	12891.8	46	23829.5	46	23434.2	46	41663.9	46	39403.4	46	10533.4	46	10917.7
47	12818.1	47	12521.8	47	22202.3	47	20476.2	47	43113.8	47	39869.8	47	12114.7	47	14211
48	13589.1	48	13744.8	48	21806.4	48	19494.9	48	41821.8	48	38602.4	48	13043.2	48	14712.6
49	13899	49	14764.4	49	22115.3	49	19293.2	49	45054.2	49	41281.1	49	13720.9	49	15237.5
50	13014.6	50	13107.4	50	19694.6	50	15721.4	50	43397.4	50	38972	50	12543.6	50	13405.9
51	13137.2	51	12672.5	51	22701.5	51	19396.7	51	44889.3	51	40278.1	51	14203.7	51	15444.2
52	10860.5	52	11828.4	52	20203.1	52	16064.6	52	46577.4	52	41896.9	52	13694.1	52	12858.1
53	10214.7	53	10980.6	53	20159.5	53	16350.1	53	47596.1	53	42830.7	53	13880.3	53	13907.1
54	10743.9	54	13178.2	54	18242.7	54	12978.4	54	47664	54	41665.6	54	13849.6	54	13856.6
55	12119.7	55	14025.5	55	18057.6	55	13883.3	55	46448.8	55	40137.1	55	12575.2	55	12479.1
56	13075.3	56	12995.7	56	22257.2	56	18438.1	56	47485.2	56	41154.8	56	13100.8	56	13068.8
57	13160.1	57	12251.1	57	19681.4	57	15823.9	57	49449.4	57	42744.7	57	12750.3	57	12127.7
58	11997.5	58	12192.3	58	17230.5	58	14181.9	58	48947.6	58	41974.3	58	13430.3	58	13037
59	13336.3	59	13111.8	59	19130.5	59	17813.3	59	48590.8	59	40697.3	59	14652.8	59	15125
60	14433.2	60	14006.6	60	17031.7	60	16020.8	60	46388.5	60	37797.5	60	13821.6	60	14994.5
61	13915.2	61	13614.5	61	17187.5	61	15746.1	61	41981.9	61	34327.2	61	12880.1	61	15048.4
62	14817.4	62	14520.7	62	17618.6	62	15251.6	62	38016.6	62	30743.5	62	12524	62	15122.7
63	14361.5	63	13149.1	63	18236	63	15349.5	63	35638.7	63	29127.6	63	10342.4	63	12588
64	12829	64	12400	64	15410	64	12885.9	64	36386.6	64	31080.4	64	8922.44	64	9433.43
65	14642.7	65	13231.1	65	15274.8	65	12295.6	65	34339.9	65	29362.5	65	7371.22	65	8095.59
66	13633.2	66	12829.7	66	15573.3	66	12632.9	66	31586.2	66	26523.8	66	6451.22	66	5756.69
67	11822.1	67	11510.3	67	13009.6	67	10057.3	67	31372.1	67	27292.2	67	5683.84	67	4955.72
68	10680.8	68	9831.34	68	12748.1	68	9534.63	68	26665.8	68	22228.6	68	6061.83	68	4390.85
69	10068.3	69	10433.7	69	12804.6	69	10067.9	69	27454	69	23017.3	69	4280.31	69	3092.18
70	9629.19	70	10548.5	70	11808.2	70	9087.43	70	36133.3	70	31639.6	70	3646.83	70	1812.87
71	9462.83	71	10136.2	71	12028.8	71	9642.06	71	30104.2	71	25709	71	3688.84	71	2095.27
72	10028.5	72	11272.3	72	11361.3	72	9076.97	72	34394.7	72	31148.7	72	4396.98	72	3194.46
73	11310.4	73	11812.1	73	11482	73	9554.04	73	36470.6	73	33441.3	73	4590.69	73	2699.07
74	10157.9	74	11238.2	74	11151.8	74	9923.98	74	34558.3	74	31503	74	4559.32	74	3611.11
75	10721.6	75	10835.7	75	11027.4	75	9722.65	75	37009.7	75	34779.7	75	4496.66	75	2872.09
76	11139.2	76	11070.1	76	14817.7	76	13489.3	76	37980.7	76	36812.7	76	4973.34	76	3581.32
77	11731.3	77	11340.1	77	13195.7	77	12152.9	77	39587.8	77	37131.8	77	6290.84	77	6180.89
78	11500.5	78	11495.3	78	13531.6	78	13372.5	78	46806.2	78	42834.5	78	7014.43	78	6284.69
79	11871.7	79	11774.3	79	14961.6	79	15004.2	79	47848.6	79	44695.8	79	7489.23	79	7776.25
80	11325.9	80	11044.9	80	16468.7	80	15892.1	80	47518.7	80	43845	80	8390.54	80	8500.45
81	12765.4	81	12566.9	81	16875.4	81	15773.7	81	45023.4	81	40959.1	81	9198.39	81	9363.3
82	12498	82	13016.3	82	15872.5	82	12819.5	82	41194.1	82	37626.4	82	10105.6	82	10394.1
83	12784.9	83	12356.5	83	13869.1	83	9976.16	83	42052.1	83	40348.5	83	10972.6	83	9829.77
84	13365.1	84	13176.4	84	13151.6	84	9479.61	84	40028.3	84	39409.9	84	10664.4	84	8310.23
85	12991.1	85	11895.7	85	12265.5	85	8490.61	85	36403.9	85	35754.2	85	11633.3	85	9269.7
86	12861.8	86	12611.4	86	13741.9	86	8993.27	86	32262.4	86	30386.3	86	10083.5	86	6967.51
87	12920.6	87	12324.8	87	11548.4	87	7165.95	87	32718.8	87	30492.8	87	9846.98	87	7616.49
88	14159	88	12771.6	88	13595.8	88	7811.02	88	36041.2	88	33655.2	88	8417.05	88	6147.31
89	13756.1	89	11856.3	89	16848.7	89	11330.8	89	35031.4	89	29691.1	89	7221.06	89	3867.25
90	13877.3	90	12314.1	90	16053.6	90	10139	90	30846.3	90	26267.8	90	9718.33	90	7529.28
91	13426.4	91	12179.1	91	15005.5	91	9645.51	91	26522.5	91	22358.5	91	8338.94	91	7189.16
92	13022.9	92	11910.1	92	14909.3	92	10588.6	92	26651.4	92	23070.3	92	6892.91	92	5632.39
93	12891.3	93	12285.5	93	16222.4	93	12034	93	28885.7	93	25134.2	93	5046.23	93	5726.69
94	12490.5	94	11444.8	94	17807.4	94	14482.7	94	28791.2	94	25327.6	94	3175.65	94	3331.36
95	12899.1	95	10343.5	95	17352.4	95	16227.5	95	25952.4	95	23003.1	95	1991.8	95	1966.63
96	12496.7	96	11411	96	15285.5	96	14027.4	96	31680.8	96	28520.2	96	1548.27	96	2009.58
97	12491.3	97	12112.4	97	13774.3	97	12855	97	32658.1	97	30675.8	97	2215.14	97	2611.79
98	12515.6	98	12025.1	98	13964.2	98	11798	98	31247.7	98	29053.3	98	3033.13	98	2730.73
99	10983.3	99	10995.6	99	13055.8	99	10386.7	99	30916	99	28794.5	99	4017.8	99	4036.6
100	10462.5	100	10531.5	100	11736.5	100	10188.3	100	31656.8	100	29705.1	100	3016.77	100	2922.72
101	10287.3	101	9903.81	101	10763.7	101	9872.23	101	31224.2	101	29349.2	101	7072.91	101	7103.21
102	9352.33	102	9350.13	102	10469.7	102	8977.86	102	27773.1	102	24967.8	102	6581.9	102	5898.78
103	10533.8	103	10140.7	103	10018	103	8276.77	103	24979	103	22558.2	103	8439.68	103	7807.3
104	9661.09	104	10121.8	104	9688.42	104	9019.76	104	24861.5	104	23331.4	104	9137.4	104	7596.59
105	7565.73	105	8844.1	105	13019.3	105	13517.7	105	24480.4	105	23148.4	105	9486.54	105	7488.72
106	5412.1	106	6210.51	106	20088.2	106	18009.9	106	23347.6	106	21322	106	9088.03	106	7555.66
107	4984.97	107	5195.62	107	19719.6	107	14605.7	107	21981.1	107	20006	107	9059.37	107	7156.61
108	5670.69	108	6377.33	108	15247.3	108	10510.2	108	20914	108	19307.2	108	8485.45	108	5888.56
109	4968.45	109	5759.45	109	18285.5	109	15343.4	109	18274.4	109	16578.7	109	6848.18	109	3968.8
110	5260.36	110	5492.36	110	19477	110	14771.3	110	15136	110	12877.9	110	8149.26	110	5047.34
111	6101.05	111	6267.46	111	20746.7	111	16390	111	12434.6	111	10218.1	111	9199.05	111	6167.84
112	6519.94	112	6457.15	112	21614.7	112	17386.7	112	11193.9	112	9469.64	112	7647.12	112	4880.75
113	7119.44	113	5780.81	113	22188.1	113	17153.7	113	10835.1	113	9495.93	113	8090.67	113	5634.34
114	8089.06	114	7739.12	114	20470.4	114	15524.5	114	10790	114	9155.45	114	11207.8	114	7831.48
115	8399.44	115	7957.76	115	19065	115	13372.8	115	10762.1	115	8694.97	115	10477.6	115	7607.13
116	8385.37	116	8035.34	116	16436.5	116	11113.2	116	11327.4	116	9145.56	116	12095.7	116	10216.3
117	9448	117	8696.44	117	13816.7	117	8374.67	117	11821.3	117	10029.3	117	11771	117	9923.01
118	8867.05	118	8511.98	118	10876.8	118	6668.91	118	13484	118	10953.6	118	11635.1	118	10514.7
119	9497.51	119	8173.79	119	12345.7	119	7579.4	119	15097.2	119	13439.6	119	10996.4	119	9338.62
120	10342.8	120	8645.93	120	11594.6	120	6663.72	120	17163.4	120	15470.6	120	9723.68	120	7937.15
121	10636.9	121	8688.56	121	13592	121	8608.6	121	17451.4	121	15099.7	121	9566.65	121	7880.98
122	10968.9	122	8736.08	122	17590.7	122	11973.7	122	16982.9	122	15328.5	122	11596.2	122	10148.7
123	11091.9	123	9231.37	123	16745.6	123	11295	123	16945.2	123	15561.4	123	11340.8	123	9857.66
124	11324.9	124	8873.83	124	19083.9	124	13975.5	124	14581.6	124	12807.2	124	8875.88	124	7671.6
125	10708.3	125	8526.16	125	20576.6	125	17557.3	125	13219.1	125	11451.8	125	12598.5	125	11690.9
126	10528.9	126	8339.99	126	21644	126	19998.9	126	17640.4	126	16534.4	126	8508.96	126	7501.76
127	11076.6	127	8667.93	127	23014	127	21032.4	127	13438.9	127	12088.4	127	8941.46	127	6983.87
128	9319.81	128	7347.99	128	23426.1	128	21228.7	128	12684.8	128	11076.8	128	11087.1	128	10353.4
129	8272.67	129	7215.99	129	22523.7	129	18196.3	129	9572.31	129	7864.83	129	11802.2	129	9452.15
130	9139.8	130	7701.25	130	23157.5	130	20930.7	130	9321.93	130	8251.13	130	11153	130	9382.41
131	9038.68	131	8002.66	131	22873.2	131	19470.9	131	8257.17	131	7995.29	131	10509.5	131	8472.55
132	9729.32	132	8927.17	132	22375.5	132	18403.7	132	8229.77	132	7391.5	132	9738.3	132	8717.96
133	10354.9	133	10359.4	133	21893.3	133	19474.4	133	10074.5	133	9101.52	133	10061	133	8918.51
134	10377.1	134	9309.23	134	22376.9	134	19550.9	134	11812.3	134	10274.6	134	10445.8	134	9093.7
135	10098.6	135	8559.31	135	20029.4	135	18055.7	135	13610.8	135	12106.7	135	9428.38	135	8709.7
136	9813.69	136	9655.43	136	16545.3	136	15046.7	136	15319.8	136	13928	136	9008.97	136	7703.23
137	9885.26	137	8659.51	137	18169.9	137	18941.4	137	15232.1	137	13268.7	137	10077.1	137	9110.35
138	9939.99	138	9942.57	138	20923.7	138	19066.8	138	16315.4	138	14162.9	138	8328.97	138	6496.36
139	9767.34	139	8388.06	139	18755.1	139	17328	139	16299.3	139	14430.6	139	7865.55	139	6841.38
140	9902.75	140	9367.6	140	18429.8	140	17655.3	140	16297.4	140	14359.3	140	8417.42	140	6444.52
141	10535.6	141	9652.34	141	19842.1	141	18115.3	141	16583.3	141	14309.1	141	8586.42	141	5789.06
142	12496.9	142	12235.5	142	19617.8	142	18809.1	142	16724.1	142	14800.6	142	8581.48	142	7863.49
143	14022	143	15154.1	143	18048.7	143	17576.8	143	12445.1	143	11360.9	143	6441.36	143	6942.93
144	15634.4	144	17064.7	144	19416.4	144	16873.9	144	10813.5	144	10006.1	144	5948.99	144	7119.42
145	17315.7	145	19992.5	145	17933.7	145	14917.4	145	11927.3	145	10702.7	145	6168.12	145	9163.88
146	14284.3	146	15944.3	146	17874.8	146	15097.3	146	12862.3	146	11213	146	5945.65	146	7561.15
147	17047.6	147	19923.3	147	18028.1	147	14730.3	147	13353.1	147	11545.2	147	5813.37	147	6421.57
148	16979.1	148	19386.5	148	18252.8	148	15091.9	148	13769.9	148	12219.7	148	8988.21	148	8021.9
149	13520.6	149	14991.6	149	17704.7	149	13969.4	149	13971.3	149	12504.5	149	11036	149	9675.34
150	12800.4	150	14205.2	150	17235.1	150	12803.7	150	15061.1	150	14363.7	150	11329.2	150	9545.69
151	11805.5	151	13154.1	151	16907.5	151	12624.1	151	17216.9	151	15552.3	151	10657	151	8087.1
152	8976.84	152	8692.46	152	15647.1	152	12662.7	152	18698	152	16056.9	152	12411.1	152	9272.07
153	8604.23	153	8035.27	153	14452	153	11303.2	153	18520.3	153	15181.9	153	12220.2	153	10462.7
154	7989.99	154	7353.61	154	13894.9	154	10085.9	154	17101	154	13520.9	154	11914	154	10946.3
155	8321.17	155	7959.42	155	13868.4	155	9876.66	155	15247.7	155	12386.3	155	10913.5	155	8641.65
156	8702.6	156	8700.02	156	13533.4	156	9040.18	156	14191.3	156	12408.1	156	10190.3	156	6916.04
157	9756.69	157	10080	157	14630.5	157	10448.6	157	13609.5	157	11641.5	157	10793.7	157	6870.74
158	8202.04	158	8350.4	158	15593.4	158	11908.7	158	12596.1	158	10791	158	12291.2	158	9113.45
159	9676.57	159	10214.6	159	15649	159	11225.3	159	12214.5	159	10018.4	159	7426.53	159	4376.18
160	10063.2	160	8063.91	160	16036.4	160	12455.2	160	12238.5	160	9676.35	160	12291.8	160	9098.79
161	12134.3	161	9908.59	161	15443	161	13509	161	12277.7	161	9924.37	161	13543.2	161	10524.7
162	13910.9	162	11413.9	162	13563.9	162	13983.9	162	13619.5	162	11666.7	162	13824.2	162	12407.1
163	10680.8	163	7588.42	163	12941	163	12169.6	163	14269	163	12395.1	163	11665	163	8977.4
164	13770.2	164	11065.6	164	12598.2	164	11399.1	164	13286.5	164	11313.4	164	11310.3	164	8407.48
165	14569.4	165	12947.4	165	11623.3	165	9933.05	165	14533.2	165	11857.3	165	12959	165	10707
166	14871.8	166	13713.5	166	10440.4	166	9024.33	166	14611.4	166	11850.5	166	12222.8	166	10254.7
167	14266.6	167	15392.1	167	9623.88	167	8582.94	167	13671.2	167	11449.3	167	11939.9	167	9410.71
168	12860.6	168	13780.6	168	8639.03	168	7614.12	168	15889.8	168	12761.6	168	11196.1	168	8440.84
169	14295.2	169	16885.4	169	8029.83	169	6973.36	169	16076.2	169	13103.2	169	11030.5	169	9286.92
170	12864.6	170	13780	170	7873.69	170	6824.92	170	15017.8	170	12400.2	170	12156.7	170	9646.45
171	10809	171	10318.4	171	7726.98	171	7569.24	171	15943.6	171	13054.1	171	10667.4	171	11315.2
172	8188.53	172	7374.14	172	7870.72	172	6585.45	172	16760.7	172	14273.9	172	9928.56	172	10263.7
173	6159.15	173	6087.71	173	7614.84	173	6231.05	173	17102.7	173	14059.2	173	10907	173	10624.3
174	5432.71	174	4357.16	174	7646.18	174	5313.67	174	17037.8	174	13745.3	174	10106.7	174	9422.34
175	6725.14	175	4590.57	175	6866.75	175	4027.15	175	17242.8	175	14160.3	175	11469.2	175	11279.3
176	8378.17	176	7153.62	176	6707.13	176	3809.39	176	17040.4	176	13862.8	176	10829.4	176	11597.7
177	10183.9	177	9188.9	177	6091.93	177	3841.18	177	16790.3	177	13237.5	177	9894.89	177	11111.3
178	10004.5	178	7341.16	178	5907.11	178	3952.67	178	16590.7	178	13435.7	178	9800.39	178	11356.6
179	9027.33	179	7123.57	179	5845.78	179	4432.38	179	16620.1	179	13551.6	179	9626.71	179	11334.9
180	8075.69	180	6283.63	180	6299.9	180	5258.63	180	16527.3	180	13266.7	180	8899.46	180	10375.2
181	7164.08	181	7191.19	181	6039.69	181	5402.17	181	16478.5	181	13334.5	181	6634.98	181	8113.41
182	7496.86	182	9666.42	182	5459.54	182	4612.83	182	15818	182	13218.7	182	5636.24	182	6340.84
183	9042.59	183	12854.2	183	6243.48	183	6177.54	183	15625.9	183	13331.2	183	5268.79	183	5599.68
184	9394.51	184	12691.1	184	5349.25	184	4941.76	184	16278	184	13229.5	184	5190.51	184	5992.51
185	9088.52	185	12938.4	185	4970.65	185	4969.82	185	16215.9	185	12188.5	185	6154.46	185	6296.7
186	11423.2	186	15446.5	186	4296.67	186	3779.89	186	15812.5	186	12377.1	186	6897.21	186	6012.74
187	8403.89	187	12601.4	187	4507	187	3951.53	187	15544.4	187	12130.5	187	7918.3	187	7252.18
188	9556.22	188	14007	188	4220.12	188	3801.38	188	16124.5	188	13015.8	188	8554.06	188	7396.52
189	9149.72	189	12875.6	189	3514.18	189	3881.42	189	15422.2	189	12303.9	189	9635.59	189	7969.31
190	9318.29	190	12728.6	190	2364.24	190	3291.66	190	14969.4	190	11923.4	190	10623.6	190	9724.11
191	8879.7	191	12400.8	191	1959.29	191	2363.35	191	15778.3	191	12072	191	9703.91	191	10305.1
192	7970	192	10132.8	192	3241.63	192	3188.21	192	18368.7	192	14332.8	192	9787.03	192	10391.8
193	7998.7	193	9011.82	193	2994.44	193	2195	193	17989	193	14461.1	193	10618.1	193	9739.95
194	9557.19	194	11154.4	194	3784.29	194	2121.87	194	18201.6	194	15222.1	194	11144	194	11514.6
195	9313.08	195	10993.1	195	4765.94	195	2549.24	195	18304.4	195	15121.2	195	10724.1	195	12013.4
196	9268.98	196	9908.53	196	5577.25	196	2917.5	196	18615	196	15067	196	10424.8	196	11261.3
197	10866.1	197	10679.6	197	5348.74	197	3591.2	197	19415.2	197	15643.4	197	10298.4	197	10740.1
198	12953.3	198	11902.3	198	6737.11	198	3867.51	198	19881.1	198	16075.2	198	9545.9	198	9811.44
199	12036.1	199	12407.9	199	9261.21	199	4242.31	199	21122.4	199	17058	199	9280.61	199	8406.1
200	13190	200	12617.1	200	7976.81	200	3929.89	200	21101.4	200	17308.4	200	9223.44	200	7799.22
201	12746.4	201	12835.4	201	10903.3	201	5713.63	201	20804.7	201	17195.2	201	9572.66	201	7021.27
202	11402	202	10982.2	202	11332.2	202	6318.68	202	19674	202	16113.7	202	9899.13	202	9230.71
203	9292.23	203	8769.18	203	12636.7	203	8530.63	203	18960.4	203	16769.5	203	10546.4	203	10686
204	7339.47	204	6070.34	204	14886.1	204	10010.9	204	17599.2	204	16082.3	204	11708.3	204	12774.4
205	9006.63	205	9258.18	205	16491.5	205	12022.6	205	17897.9	205	15300.1	205	10364.6	205	11293.6
206	11213.8	206	11162.4	206	18519.8	206	13279.8	206	16691.2	206	14721.6	206	12123.3	206	12794.6
207	12051.9	207	11929.3	207	19030.9	207	15190.1	207	15511.4	207	13397.3	207	11843.8	207	13647.4
208	11747.1	208	11081.8	208	19123.2	208	14304.4	208	14750.6	208	12215.9	208	9368.72	208	9601.56
209	10706.1	209	8962.29	209	16972.9	209	11079	209	13721	209	10988.9	209	9393.32	209	7485.48
210	10918.8	210	7250.66	210	17209.8	210	12316.5	210	12595.2	210	9687.92	210	7923.54	210	7000.49
211	8421.74	211	5551.77	211	19350.2	211	16019.7	211	11706.9	211	9213.89	211	6656.02	211	8032.28
212	5751.39	212	4023.41	212	17129.5	212	15867.5	212	11257.5	212	9143.7	212	6691.86	212	9600.25
213	4659.22	213	3288.2	213	15277.8	213	12983.2	213	10715.2	213	7897.11	213	8277.4	213	11030
214	3943.64	214	2764.05	214	15253.8	214	12032	214	9581.6	214	6793.14	214	8874.16	214	11507.3
215	4205.97	215	2732.72	215	17635	215	13241.3	215	9490.43	215	6440.58	215	8931.84	215	12250.7
216	4515.56	216	3137.66	216	16935.7	216	13506.9	216	6592.41	216	4437.87	216	8884.32	216	11284.9
217	4737.6	217	3558.86	217	19697.3	217	15089.9	217	5562.25	217	4445.37	217	8372.95	217	9805.38
218	4393.47	218	3002.77	218	17995.4	218	15353.3	218	5725.66	218	4567.94	218	7578.26	218	8916.07
219	4876.48	219	3893.46	219	19509.7	219	13956.1	219	5430.41	219	4030.31	219	7094.72	219	8400.5
220	4714.77	220	4594.49	220	19029.7	220	17294	220	6332.1	220	5659.87	220	6967.54	220	8481.11
221	5103.44	221	5435.41	221	17433.8	221	15878	221	7371.26	221	6459.17	221	9396.04	221	11177.2
222	5658.43	222	5077.48	222	15302.7	222	14779.5	222	7074.76	222	5988.95	222	11620.9	222	11491.1
223	5845.54	223	4870.73	223	17285.9	223	14717.2	223	5895.09	223	4354.41	223	12148.2	223	11159.9
224	6439.38	224	5284.13	224	18446.7	224	15622.7	224	4513.97	224	3780.68	224	11882.8	224	10591.4
225	5484.15	225	4587.65	225	18895.5	225	15709.9	225	4469.54	225	3416.91	225	10641.2	225	9189.49
226	5429.04	226	4729.79	226	18311.3	226	15508.3	226	4559.81	226	3572.87	226	8002.44	226	6578.12
227	5418.55	227	5030.8	227	18634	227	15945.1	227	6264.34	227	4992.51	227	7656.34	227	6208.48
228	4537.82	228	6685.58	228	21036.9	228	18290.1	228	9509.26	228	7663.12	228	8400.9	228	6685.55
229	4152.39	229	6266.5	229	18818.2	229	17175.1	229	6644.3	229	4508.83	229	7475.14	229	6336.69
230	4408.72	230	6279.75	230	23503.8	230	21175.6	230	3905.23	230	2056.37	230	9359.77	230	8270.64
231	5721.83	231	5530.76	231	20887.2	231	19610.8	231	6235.76	231	4366.73	231	9704.87	231	9087.61
232	7630.82	232	7460.17	232	15859.9	232	16637.7	232	7631.51	232	6120.67	232	9423.14	232	10236.5
233	7609.79	233	7706.55	233	19067.7	233	19965.5	233	6385.06	233	5334.69	233	8539.63	233	10493.6
234	8755.13	234	8239.77	234	21471.2	234	20701.6	234	12238.4	234	12226.6	234	8977.38	234	11544.6
235	8194.41	235	9778.47	235	14572.5	235	15724.3	235	9579.63	235	9712.04	235	10166.4	235	12720
236	7875.45	236	9302.76	236	21344.5	236	20421.1	236	11578.5	236	11314.1	236	9465.92	236	11179.7
237	6491.19	237	6952.81	237	18873.9	237	20124.9	237	9908.17	237	9349.07	237	7780.86	237	9239.5
238	6381.32	238	5927.33	238	16171.9	238	17492.3	238	13695.7	238	12543.2	238	9198.88	238	10226.2
239	5316.95	239	5355.93	239	19149.8	239	19412.4	239	13480	239	11431.6	239	10269.6	239	10679.9
240	6090.31	240	6193.96	240	20971.1	240	19172.6	240	12554.9	240	10603.5	240	9558.63	240	10074.7
241	7138.14	241	5951.96	241	19664.4	241	20183.7	241	13867.3	241	11338.3	241	10005.3	241	9956.19
242	8340.24	242	7146.98	242	19654.8	242	20657.9	242	12029.8	242	9761.01	242	11179.4	242	11026.1
243	8140.28	243	6138.2	243	20756.5	243	21739.5	243	11419.8	243	8799.41	243	9751.56	243	9473.23
244	9705.8	244	6742.13	244	20916.3	244	22727	244	10769.1	244	8339.05	244	10999.1	244	10106.2
245	8317.23	245	5127.21	245	19796.8	245	23342.4	245	9806.14	245	7913.81	245	10923.8	245	10427.8
246	9264.29	246	6788.64	246	19004.1	246	23822.6	246	9830.27	246	7941.14	246	13862.7	246	14906.5
247	10532.4	247	7938.56	247	18420.8	247	23916.4	247	10262.5	247	8412.85	247	11714.2	247	11534.1
248	11972.1	248	8467.3	248	17928.5	248	22464	248	10642.3	248	8662.35	248	11744.5	248	13442.8
249	11421.8	249	7728.63	249	18122.6	249	20624.6	249	11017.1	249	8953.01	249	16700.5	249	17967.9
250	11594.4	250	7905.22	250	19414.5	250	20096.1	250	11594	250	10060.9	250	15921.6	250	18335.9
251	12355.8	251	11422.4	251	21736.7	251	20384.3	251	10994.5	251	10738.7	251	17231.5	251	18904.8
252	10707.8	252	11350.4	252	23986	252	21342.2	252	11505	252	12674.4	252	17544.4	252	19224
253	11291.1	253	12189.4	253	25719.2	253	22116	253	10147.9	253	11740.9	253	17391.3	253	18623.3
254	10389.6	254	10834.7	254	27349.8	254	22926.1	254	9924.02	254	11258.7	254	18311.6	254	17179.3
255	11973.5	255	11910.7	255	27651.2	255	23105	255	12396.4	255	13046.6	255	15593.4	255	12432.1
256	11159.5	256	11026.1	256	26987.8	256	22299.2	256	14604.4	256	14045	256	13631.5	256	9927.88
257	9572.44	257	9662.25	257	26833.7	257	21893.9	257	16128.9	257	13753.7	257	14441	257	10276.8
258	7463.74	258	6427	258	25002.8	258	21254.4	258	16255	258	12270.5	258	16925.3	258	11252.8
259	10829.2	259	10399.7	259	21985.3	259	20887.8	259	16468.8	259	13016.5	259	15068.8	259	9969.78
260	7808	260	6872.77	260	19234.8	260	19317.1	260	17321.6	260	15994.3	260	14882.8	260	9354.62
261	6395.56	261	5232.88	261	20337.9	261	17740.6	261	16204.7	261	15988.5	261	14536.8	261	9830.84
262	5929.8	262	4830.11	262	24658.1	262	23454	262	18600.6	262	16810.8	262	13765.8	262	10035.6
263	5579.11	263	4572.85	263	23554.5	263	25803.3	263	18613.8	263	19428.3	263	12258.1	263	9979.32
264	5653.97	264	5495.93	264	18137.8	264	18303.8	264	14785.5	264	16071	264	11308.8	264	10006
265	5622.67	265	5278.68	265	15733.9	265	13319.2	265	11568.3	265	12822.7	265	13793.9	265	11978
266	6518.22	266	6128.04	266	18707.5	266	12826.3	266	14010.1	266	14257.4	266	11191.9	266	10700.2
267	5420.34	267	6752.51	267	21559.5	267	16861.8	267	14006.5	267	13065.6	267	11228.3	267	10960.9
268	5405.83	268	6678.6	268	23724.3	268	20532.3	268	12040.8	268	11148.4	268	10420.3	268	9702.34
269	4345.33	269	5961.07	269	22662.7	269	18605.7	269	9423.12	269	8950.82	269	9607.12	269	8297.5
270	4364.82	270	6146.69	270	21779.7	270	19002.2	270	11237.8	270	10890.7	270	8570.6	270	7136.64
271	4420.97	271	5833.1	271	21355	271	21291.3	271	13979.8	271	13574.5	271	9967.93	271	7186.61
272	6186.79	272	5813.33	272	21483.7	272	20184.7	272	14928.8	272	15172.9	272	11731	272	7923.12
273	6335.5	273	5917.11	273	24660.5	273	26326.7	273	15965.4	273	15596	273	9818.22	273	6582.93
274	7144.31	274	7684.35	274	24412	274	26474	274	17651.8	274	16088.8	274	10682.9	274	7849.45
275	7745.54	275	7723.54	275	22868.7	275	24359.8	275	17199.5	275	15481.7	275	9805.64	275	8278.35
276	6907.98	276	6260.71	276	19316.2	276	20079.4	276	15524.9	276	14717.2	276	9569.8	276	8454.32
277	6366.01	277	5421.17	277	18938.6	277	19995.4	277	14182.3	277	13030.9	277	8443.6	277	8035.12
278	7041.47	278	6145.17	278	19353.9	278	18539.4	278	17106.6	278	14259.3	278	9785	278	8322.83
279	7686.67	279	6633.94	279	15511.7	279	15480.7	279	17063.2	279	12758.9	279	9206.6	279	7129.58
280	6190.88	280	5788.85	280	13078.2	280	13617.7	280	17267.5	280	14391.4	280	8078.25	280	5870.42
281	7844.43	281	8245.09	281	12332.4	281	13426.4	281	16549	281	13218.8	281	8446.92	281	7464.81
282	7192.07	282	6777.66	282	13537.9	282	15694.2	282	16215	282	13868.9	282	10642.7	282	10121.1
283	7677.38	283	7183.99	283	11824.6	283	14374.9	283	15472.5	283	13688.5	283	9104.46	283	8337.89
284	7878.67	284	6543.02	284	14564.5	284	18595.4	284	14439.3	284	13916.5	284	11258	284	10992.3
285	9821.39	285	8693.34	285	17850.3	285	20057.9	285	14704.1	285	13698.7	285	9829.77	285	9845.67
286	9553.29	286	8780.79	286	14513.9	286	17940.2	286	14815.9	286	13937.4	286	6160	286	7384.37
287	9223.61	287	8451.04	287	19381.8	287	22418.5	287	12759	287	12349	287	3843.22	287	5446.84
288	8510.77	288	8478.07	288	19366.2	288	22764.6	288	13712.1	288	14167.3	288	4295.04	288	5684.28
289	5787.2	289	7368.03	289	20559.9	289	23596.9	289	13857.7	289	14638.5	289	4887.94	289	5717.57
290	4043.75	290	4978.52	290	24851.6	290	26578.9	290	11871.6	290	12881.6	290	7499.96	290	7699.5
291	3451.52	291	4603.81	291	24237.6	291	24777.1	291	9561.56	291	10004.5	291	9715.63	291	8836.48
292	4767.11	292	5905.34	292	26141.8	292	25130.7	292	11579.5	292	10702.1	292	11603.7	292	10048.2
293	4810.72	293	5972.23	293	26937	293	23045.4	293	15735	293	14638.8	293	12267.1	293	10132.5
294	6687.67	294	8774.35	294	25240.2	294	22106.8	294	15216.9	294	13454.3	294	9846.66	294	8655.85
295	8109.3	295	9698.46	295	25106	295	20070.7	295	14497.5	295	12937.7	295	10582.3	295	9852.72
296	7287.31	296	8391.59	296	24955.7	296	19022.1	296	14813.2	296	12605.8	296	10272.2	296	9261.77
297	6535.35	297	7460.38	297	24678.4	297	17767.2	297	14215.1	297	11253.8	297	12975.2	297	10842.4
298	6858.12	298	6718.59	298	24078.4	298	17176.9	298	14147.2	298	11148.2	298	10560.6	298	9486.43
299	6957.06	299	7887.12	299	29182.2	299	24622.5	299	14508.9	299	11794.2	299	8853.9	299	8198.26
300	6722.68	300	6451.46	300	31764.5	300	31623.4	300	15824.7	300	12871.1	300	9569.61	300	9203.91
301	5577.72	301	5836.35	301	29710.2	301	29152.5	301	12625.3	301	9223.06	301	8896.35	301	7907.28
302	5374.49	302	5643.26	302	29366.3	302	24380.7	302	14193.4	302	11404.5	302	8167.53	302	6368.16
303	5050.77	303	4601.86	303	30999.2	303	26435.2	303	12679.2	303	11170.4	303	7789.15	303	6929.35
304	5394.89	304	5164.27	304	32299.4	304	29364.5	304	11631.3	304	10680.9	304	7721.82	304	8532.2
305	6203.05	305	6406.76	305	32216.3	305	28958.3	305	9792.25	305	9836.71	305	8759.57	305	9624.56
306	7042.31	306	8073.48	306	28893.3	306	24176.6	306	7892.95	306	7278.7	306	9584.27	306	10883.4
307	6770.3	307	6801.28	307	26123.8	307	22380.8	307	6989.96	307	5729.25	307	9429.96	307	10432.7
308	6896.74	308	7646.92	308	24784.3	308	21994.1	308	6305.15	308	5645.98	308	8476.39	308	8448.45
309	7698.05	309	8702.16	309	22635.2	309	20416.7	309	5946.35	309	5523.42	309	7617.95	309	6640.22
310	8919.78	310	10675.6	310	20576.8	310	18707.9	310	6679.28	310	5497.2	310	7150.32	310	5877.49
311	10115.2	311	11343.8	311	18872.6	311	16271.6	311	7427.47	311	6076.15	311	6689.56	311	6072.75
312	11640.2	312	12249	312	19972.3	312	16188.2	312	7706.64	312	5465.31	312	6625.17	312	7056.59
313	11548.5	313	11241.8	313	24469.4	313	23898.8	313	6492.9	313	4873.82	313	9042.34	313	11354
314	11843.5	314	10953.8	314	20812.1	314	19766.8	314	5867.58	314	4298.17	314	11481.9	314	15600.7
315	13575	315	13912.3	315	16879	315	15625	315	5499.91	315	3653.79	315	10371.7	315	13928.6
316	14047.5	316	13107.6	316	12995.9	316	11014.5	316	5687.65	316	3118.74	316	10534.7	316	13614.3
317	14866.4	317	15734.1	317	12362.7	317	10472.6	317	5373.46	317	3164.58	317	11397.1	317	11818.1
318	14484.1	318	14658.9	318	13808.1	318	11604.6	318	5115.67	318	4352.1	318	12368.1	318	10499
319	15042.6	319	15499.6	319	15409.6	319	12703.8	319	4327.85	319	4066.21	319	12827	319	10264.2
320	17017.4	320	14658.3	320	19273.6	320	16948.7	320	4343.95	320	4466.16	320	11931.8	320	10079.2
321	12953.2	321	7641.03	321	19231.7	321	16735.4	321	4982.34	321	4581.58	321	11012	321	9970.12
322	15899.6	322	12758.7	322	20765.9	322	19008.1	322	5834.62	322	5033.98	322	11343	322	11285.2
323	16870.5	323	13831.4	323	15787.7	323	19128	323	6538.7	323	5175.25	323	10604.3	323	10650.4
324	17095.4	324	17716.5	324	17072.7	324	19490.8	324	6900.36	324	5758.69	324	10957.5	324	12896.1
325	14411.8	325	14878.4	325	18629.2	325	19631.7	325	7460.14	325	6038.4	325	13108.8	325	15765.5
326	11736.5	326	10905.8	326	15750.9	326	17606.4	326	8327.77	326	5976.24	326	15203.6	326	15967.6
327	10798.7	327	10081	327	14494.3	327	17375.1	327	10228.4	327	7477.32	327	9282.02	327	7974.3
328	9894.18	328	9169.61	328	15312.2	328	17515.3	328	11844.7	328	9346.58	328	6286.8	328	5495.19
329	8634.28	329	8600.39	329	13056.7	329	15228.3	329	11767.7	329	9492.79	329	6139.63	329	5565.25
330	7975.6	330	5317.5	330	9635.5	330	13188	330	10085.9	330	8317.43	330	6496.96	330	6198.45
331	7748.17	331	7045.04	331	10491.9	331	13715.2	331	9842.58	331	8345.17	331	5662.4	331	5908.32
332	8301.53	332	5633.3	332	10096.7	332	10630.6	332	10160.6	332	8627.76	332	6196.65	332	6680.57
333	9248.88	333	7844.07	333	9551.73	333	8702.39	333	10682.9	333	9087.61	333	6565.57	333	7932.51
334	10218.5	334	11374.4	334	11570.7	334	10048.6	334	9354.71	334	7092.69	334	5770.19	334	7143.34
335	8837.33	335	11407.6	335	13340.2	335	10485.4	335	9535.92	335	6993.85	335	4013.49	335	4207.36
336	7424.29	336	8060.89	336	13504	336	9889.18	336	9444.37	336	6037.33	336	2895.34	336	4048.73
337	6856.6	337	6257.14	337	16584.7	337	12579.1	337	9185.88	337	5808.64	337	3431.24	337	4297.36
338	7039.08	338	5982.92	338	16753.5	338	12593.2	338	8940.7	338	5876.08	338	3253.96	338	4152.87
339	8246.69	339	6024.43	339	22293.8	339	18747	339	9054.95	339	5805.4	339	3149.08	339	3855.61
340	9690.17	340	7871.13	340	23973.1	340	22770.1	340	8628.95	340	4920.41	340	3333.66	340	3898.21
341	12906.5	341	13219.1	341	22964.7	341	23544.1	341	8060.66	341	5000.55	341	4717.51	341	4354.84
342	13985.7	342	15400	342	20458.1	342	20932.1	342	7180.23	342	4635.12	342	2379.04	342	2345.84
343	12837.5	343	14689	343	17755.5	343	17523.1	343	7724.89	343	5620.93	343	4038.26	343	3029.04
344	15686.4	344	16774.8	344	13531.2	344	14140.5	344	8843.75	344	7695.65	344	4211.96	344	3294.9
345	14228.8	345	13457.1	345	13302.9	345	13319.4	345	10474.1	345	9143.13	345	4521.54	345	5287.64
346	13187.3	346	12673	346	14470.5	346	13969.6	346	10238.1	346	8603.15	346	5221.93	346	4593.12
347	10474.1	347	12312.4	347	12993.7	347	11268.5	347	10762.2	347	10417.1	347	5813.02	347	4920.34
348	11885.4	348	13043.2	348	11970.4	348	12370.6	348	10727.3	348	10299.3	348	6352.86	348	5727.69
349	11183.6	349	11515.2	349	12968.7	349	11386.2	349	10879.3	349	9046.89	349	7392.94	349	6422.96
350	10215.6	350	9153.24	350	13417.7	350	11186.9	350	10356.5	350	7693.28	350	9530.48	350	7997.74
351	11198.8	351	11456	351	13171.8	351	12099.1	351	9971.55	351	7457.86	351	11276	351	9974.57
352	10268.3	352	10114.3	352	14107.2	352	12437.8	352	8430.38	352	6340.18	352	12304.1	352	9953.5
353	9413.82	353	10266.8	353	14120.6	353	12039	353	8982.09	353	6810.1	353	14680.3	353	13993
354	8428.97	354	7697.76	354	13533	354	11070.2	354	8157.37	354	6517.2	354	16483.7	354	15797.3
355	8044.07	355	7209.69	355	13964.3	355	12508	355	6878.45	355	5160.37	355	18630.4	355	18709.3
356	8519.01	356	8345.32	356	13301.7	356	11476.4	356	7088.46	356	5127.63	356	23828.2	356	23200.3
357	8059.3	357	6652.06	357	14399.3	357	12047.6	357	7449.56	357	5094.71	357	22306.3	357	21282.2
358	9572.89	358	8083.22	358	13507.7	358	11963	358	7073.24	358	5698.25	358	23640.9	358	23874.7
359	10375.3	359	7856.65	359	13314.8	359	12295	359	7416.69	359	6391.67	359	24628.7	359	22395.8
360	12353.9	360	9014.23	360	12303.1	360	12471.1	360	8337.08	360	6411.14	360	24231.4	360	18867
361	13585.5	361	12862.1	361	8632.68	361	9421.31	361	9289.85	361	5813.96	361	23901.1	361	18482.8
362	14385.9	362	13257.9	362	6619.2	362	7395.84	362	10762.3	362	7262.45	362	18953.8	362	13289.4
363	13613.3	363	13436.2	363	4820.07	363	4617.31	363	13173.2	363	8803.05	363	15638.2	363	12736.3
364	13545.7	364	14980.1	364	5286.09	364	4077.14	364	13709.4	364	9245.48	364	23814.9	364	18127.5
365	11631.4	365	13099.4	365	7154.15	365	6216.52	365	15632.5	365	10547	365	20079.8	365	15049.3
366	12558.9	366	12703.9	366	9414.24	366	7189.4	366	17212.4	366	12304.3	366	16637.8	366	13284.5
367	11070.1	367	10442	367	12126.5	367	9270.57	367	18841.1	367	14168	367	14645.6	367	12144.4
368	9868.81	368	8914.04	368	14115	368	11839.4	368	17568.6	368	13557.8	368	18204.5	368	15165.8
369	8714.17	369	8109.8	369	14033.2	369	12472.2	369	16898.1	369	13532.6	369	20438.2	369	20388.4
370	8264.85	370	8935.99	370	11745.8	370	11044.2	370	15243.4	370	13377.5	370	18173.9	370	18626.1
371	8706.15	371	10194.2	371	13159.7	371	11950.5	371	17185.8	371	12801.8	371	14383.8	371	15292.5
372	10531.1	372	11001.3	372	10901.9	372	10376.8	372	16818.8	372	12081.3	372	12372.5	372	9899.04
373	14169.7	373	13662.3	373	9021.8	373	8876.93	373	18494.6	373	15614.5	373	11658.5	373	8920.57
374	16093.1	374	14088.2	374	8986.85	374	8663.26	374	18137.2	374	13962.7	374	12196	374	6942.39
375	13983.3	375	10750.1	375	6764.63	375	4569.84	375	17467.5	375	14200.4	375	11740.8	375	8540.11
376	13843.7	376	11163.3	376	6678.69	376	4695.31	376	14642	376	12208.9	376	12297.1	376	9610.26
377	11852.5	377	9534.41	377	6373.31	377	4399.89	377	15301.9	377	12552.4	377	12428.4	377	10177.1
378	9701.48	378	6622.75	378	7640.85	378	4676.21	378	12879.6	378	10271.1	378	12681.3	378	10753.5
379	8760.73	379	5450.24	379	6019.73	379	4249.38	379	12946.4	379	10328.7	379	12771.9	379	12002.3
380	8926.07	380	5969.82	380	7445.95	380	4601.38	380	10031.3	380	9192.89	380	10244.9	380	9754.7
381	10136.2	381	7519.56	381	12263.3	381	7660.3	381	8932.91	381	8127.25	381	11033.3	381	9511.41
382	11763.3	382	9243.96	382	10973.5	382	7369.23	382	9585.88	382	8895.23	382	12423.1	382	10859.4
383	13263	383	11126.3	383	12182	383	8047.25	383	8607.31	383	7413.37	383	10365.2	383	9183.68
384	14863	384	13485.1	384	14426	384	9839.34	384	7753.33	384	6530.8	384	11734.8	384	10362.9
385	15558.8	385	15745.8	385	15509.6	385	12036.5	385	8977.85	385	7732.46	385	11509.2	385	10436.1
386	13599.2	386	14618.9	386	16430.9	386	13345.1	386	8126.23	386	6382.68	386	9946.27	386	10607
387	11623.3	387	11116.5	387	15283.6	387	11689.8	387	6980.18	387	5975.43	387	10261.5	387	12202.4
388	11392.3	388	9948.27	388	14069.2	388	11739.9	388	6068.03	388	4981.96	388	9061.85	388	8089.61
389	13090.8	389	9577.58	389	13846.6	389	10314.2	389	5266.19	389	4716.21	389	10391	389	12304.1
390	13683.2	390	9656.81	390	15969.8	390	13411	390	5041.06	390	4700.22	390	10150.3	390	10407.2
391	14372.3	391	9500.44	391	16348.3	391	15312	391	4947.4	391	4251.96	391	9719.72	391	8968.77
392	15035.6	392	11501.1	392	16818	392	16775.6	392	5600.68	392	4716.88	392	9424.2	392	9176.6
393	15034.4	393	11364.8	393	15038.7	393	13623.7	393	6133.14	393	5512.13	393	9151.56	393	8799.88
394	15608.6	394	11179.3	394	15992.6	394	14085.4	394	8338.13	394	6781.01	394	8903.37	394	8391.35
395	15330.4	395	12671.3	395	20655.1	395	17202.5	395	10622.4	395	7974.02	395	8838.94	395	6447.88
396	15609	396	11548.9	396	24552.5	396	20564.5	396	11320.4	396	9695.33	396	9505.76	396	7036.06
397	15476.7	397	12316	397	28098.8	397	25058.3	397	12228.4	397	10845.6	397	10000.5	397	7408.72
398	15827	398	13032	398	27037.9	398	25777.5	398	13619.4	398	11572.4	398	9923.33	398	8740.24
399	14618.3	399	11200.1	399	25592.8	399	25549.9	399	14367.4	399	12381.5	399	9795.72	399	9266.34
400	15461.3	400	13861.9	400	24682	400	24793.1	400	14113.8	400	11510.8	400	9240.62	400	9451.14
401	15743.9	401	13144.5	401	22190.7	401	20999.6	401	13513	401	11133.9	401	8596.76	401	8701.3
402	15941	402	14755.6	402	23439.7	402	24179.7	402	10172.4	402	8594.77	402	7937.22	402	7645.62
403	15388.2	403	15274.2	403	20881.5	403	19994.2	403	7956.26	403	6626.13	403	6906.18	403	6993.55
404	14885.3	404	14724.9	404	22205.8	404	20215.7	404	7117.01	404	5801.58	404	5189.89	404	5066.97
405	13270.8	405	14181.4	405	21050.6	405	19038.6	405	5958.38	405	4579.96	405	6232.6	405	5192.14
406	10848.1	406	13430	406	19062.2	406	17483	406	5444.94	406	4363.09	406	5769.7	406	4587.12
407	10749.4	407	11387.7	407	20383.6	407	18407.7	407	5440.82	407	3875.73	407	4316.64	407	3989.86
408	12522.1	408	11983.4	408	20030.7	408	18029.4	408	6676.12	408	4473.19	408	5919.22	408	5638.69
409	12169.8	409	12273.3	409	23561.9	409	19878.8	409	7911.17	409	5818.54	409	7069.98	409	6113.03
410	12104.4	410	12815.8	410	22643.4	410	19871	410	7989.04	410	6011.85	410	7438.48	410	7118.97
411	10782.3	411	13369.9	411	24125.4	411	20453.4	411	9565.05	411	6371.1	411	6186.05	411	6666.06
412	13574.8	412	17674.8	412	24746.3	412	22322	412	9721.76	412	6049.77	412	4957.5	412	5113.68
413	14072.4	413	15457.8	413	24852.6	413	22130.5	413	10368.5	413	6730.88	413	5123.85	413	4839.03
414	16300.3	414	14405.9	414	24475.3	414	23322.3	414	10729.5	414	7011.48	414	6137.93	414	6251.93
415	14720.8	415	13231.7	415	20401.2	415	21857.5	415	10580.6	415	6798.28	415	7892.48	415	7576.7
416	14693.4	416	13235.6	416	26103.8	416	25759.4	416	10587.2	416	7353.71	416	9622.86	416	8912.57
417	14538.3	417	14085.7	417	21380.5	417	21933.7	417	8468.55	417	4985.54	417	9776.08	417	9552.64
418	13359.2	418	9005.83	418	21950.7	418	21331.8	418	9490.72	418	6294.41	418	10139.4	418	11426.3
419	12079.2	419	10395.9	419	20782.4	419	20116.2	419	10943.3	419	6139.22	419	10081.6	419	10572.8
420	10277.5	420	9755.26	420	19972.7	420	18950.6	420	13515.4	420	8038.05	420	11022.1	420	11241.2
421	9438.31	421	9594.37	421	18007.9	421	17490	421	16411.7	421	11473.6	421	12584.4	421	12265.8
422	9024.86	422	9721.68	422	16838	422	16166.7	422	17859.9	422	13311.2	422	14353.9	422	12622.7
423	8565.91	423	8748.11	423	15852.2	423	14166.8	423	18420.5	423	14199.3	423	14733.6	423	12964.4
424	7993.49	424	8447.94	424	15821.1	424	12884.3	424	17650.4	424	13738.4	424	13854.1	424	11759.8
425	8590.65	425	9541.09	425	16775.5	425	14423.6	425	18115.8	425	15304.2	425	14451.7	425	12349
426	7721.7	426	8355.48	426	15332.7	426	14075.8	426	18612	426	16789.9	426	11806.9	426	9886.19
427	8547.45	427	9175.73	427	17331.4	427	14757.5	427	17339.4	427	14473.8	427	10607.5	427	7887.96
428	10696.4	428	8951.16	428	17275.7	428	16230.7	428	15844.2	428	12936.3	428	7877.24	428	6378.27
429	11907.4	429	8862.22	429	16773.2	429	16374.2	429	15551.9	429	12502.2	429	8522.79	429	7776.72
430	10233	430	6844.84	430	18111.8	430	17877.6	430	14143	430	10544.1	430	8574.55	430	8583.13
431	9067.8	431	7851.07	431	16829.4	431	18177.7	431	12733.4	431	9261.45	431	10956.5	431	10195.6
432	10902.9	432	11585.6	432	18374.3	432	18686.9	432	12973.1	432	10379.7	432	12523.9	432	12398.9
433	11605.4	433	12248.9	433	16844.5	433	19199	433	12250.5	433	10108.9	433	13259.8	433	12823.7
434	13311.1	434	11238	434	15601.1	434	17063.6	434	6919.14	434	3580.36	434	14802.2	434	17078.1
435	12839.6	435	10183.1	435	12621	435	13842.5	435	9463.93	435	6346.9	435	14531.2	435	16925.2
436	14199.6	436	11795	436	12557.5	436	12917.3	436	11464.6	436	8081.68	436	13541.8	436	17583
437	15818.1	437	13800	437	10853.3	437	11025.7	437	7226.06	437	3872.84	437	13070.6	437	14470.5
438	14642.9	438	12661.5	438	10658.5	438	10520.4	438	5919.93	438	2826.06	438	12381.9	438	12367.8
439	14599.2	439	12726.1	439	11466.6	439	11340.6	439	8095.26	439	4962.31	439	11263.4	439	9795.45
440	15735.1	440	12755.1	440	8325.92	440	8511.33	440	5669.24	440	2890.92	440	8425	440	7199.29
441	15055.1	441	12763.1	441	7287.44	441	8074.35	441	6788.11	441	3725.6	441	12945.7	441	12791.3
442	14618	442	11634.9	442	7908.79	442	7599.96	442	8245.17	442	4783.41	442	10851.2	442	9627.11
443	13777.4	443	11283.8	443	9158.65	443	7720.35	443	9421.84	443	5184.74	443	11235	443	9696.4
444	14048.5	444	12369.7	444	9744.67	444	7577.07	444	10153.3	444	5458.38	444	10906.3	444	9015.4
445	12597.3	445	12945.9	445	9123.04	445	7408.46	445	11905	445	7027.21	445	10127	445	6811.41
446	13187	446	13466.9	446	9412.07	446	8684.09	446	6625.16	446	3285.97	446	11499.7	446	9825.56
447	13098	447	12140.6	447	8203.85	447	6980.86	447	7474.51	447	4277.74	447	9942.16	447	7251.04
448	13301.2	448	11360.2	448	9477.78	448	7062.7	448	9345.36	448	5567.43	448	8670.22	448	7237.72
449	12314.7	449	9704.53	449	8988.1	449	8014.59	449	11334.3	449	7546.26	449	8424.93	449	8703.25
450	11232.5	450	10051	450	6752.62	450	6508.7	450	11662.4	450	8125.93	450	10507.9	450	12038.7
451	11936.8	451	10972.2	451	6759.47	451	6965.64	451	7127.36	451	4391.65	451	14996.6	451	17323.9
452	13366.5	452	13262.2	452	6320.61	452	7420.9	452	7519.11	452	5016.25	452	16490.6	452	16272.7
453	14507	453	13953.5	453	4929.69	453	6810.5	453	8344.51	453	5803.62	453	15139.6	453	13936.9
454	14017.4	454	13620.9	454	3673.75	454	4456.26	454	8594.67	454	5810.42	454	14108.5	454	13763.4
455	12718.5	455	13515.2	455	6280.49	455	6233.09	455	8764.53	455	6066.84	455	14965.5	455	13953.8
456	11012.9	456	12859	456	8462.73	456	7510.19	456	8212.75	456	5475.67	456	15174.5	456	15156.9
457	10538.5	457	12377.5	457	10371.7	457	8889.4	457	8676.11	457	5308.51	457	14708.4	457	12457.3
458	10462.6	458	10928.6	458	8935.12	458	8147.75	458	7510.75	458	4665.72	458	15009.6	458	12481
459	9930.46	459	12303.1	459	9367.6	459	8371.58	459	6738.06	459	4161.36	459	14647.3	459	12661.2
460	10777.1	460	12966.5	460	11013.8	460	8428.82	460	8019.65	460	5083.22	460	15658.2	460	13060.4
461	12346.1	461	13529.8	461	11799.5	461	9129.35	461	10917.5	461	8651.13	461	16648.4	461	13164.9
462	14736.9	462	13794.3	462	12926.7	462	9473.78	462	10009.8	462	6865.89	462	16176.1	462	12508.6
463	14576.3	463	13337.1	463	12613.5	463	9252.53	463	9406.98	463	6410.12	463	13540.5	463	10065.8
464	14145.1	464	13721.4	464	13999.3	464	12130.3	464	14474.4	464	10460.7	464	10303	464	8624.75
465	15248.5	465	14871.2	465	15854	465	16059.8	465	17446.7	465	12644.9	465	9278.05	465	8886.43
466	16762.2	466	14104.3	466	16847.4	466	17645.2	466	16138.9	466	12256.7	466	9799.41	466	9969.31
467	17304.2	467	14143.9	467	17788	467	18179.1	467	13234.4	467	9475.52	467	9739.84	467	10395.1
468	16106.1	468	13953.6	468	17311.4	468	16954.2	468	13644.9	468	9573.28	468	9183.86	468	10616.6
469	14294.8	469	12565.8	469	17669.2	469	18088.9	469	10715	469	8178.37	469	8884.31	469	11198.3
470	14785	470	12842.5	470	18172.5	470	16934.6	470	12092.8	470	8976.09	470	9586.34	470	11492.7
471	13363.8	471	10882.9	471	17477.8	471	14899.1	471	11694.5	471	8792.6	471	10663.9	471	11765.4
472	7648.7	472	5873.07	472	14950.3	472	14472.3	472	11296.9	472	9301.01	472	10243.9	472	10216.6
473	4949.54	473	4197.66	473	13074.9	473	13720.2	473	10306.2	473	8920.12	473	10432.4	473	9268.09
474	4920.16	474	4443.73	474	13020.6	474	13955.8	474	8894.12	474	8387.27	474	10163.7	474	9784.45
475	4250.31	475	3785.95	475	14828	475	15181.8	475	9705.26	475	9154.47	475	10367.9	475	9892.14
476	3829.79	476	3601.91	476	15792.2	476	14768.5	476	10445.9	476	10673.2	476	11006.3	476	10575.8
477	4258.96	477	5439.25	477	13731.1	477	12214.6	477	10302.2	477	10751.7	477	10742.1	477	10303.7
478	4571.54	478	5270.56	478	11527.1	478	12357	478	10471.4	478	10492.4	478	11090.7	478	10226
479	5480.75	479	6218.48	479	11465.2	479	13127.9	479	10783.2	479	10116.5	479	7959.66	479	7289.77
480	5156.97	480	5589.12	480	13157.7	480	13347.4	480	8396.75	480	7543.82	480	6744.33	480	5614.44
481	5308.89	481	6229.5	481	15345.6	481	15373.3	481	8332.42	481	7834.97	481	4683.37	481	3889.12
482	7132.96	482	8460.14	482	15609.7	482	15238.7	482	8816.48	482	8487.08	482	5297.59	482	5717.29
483	6707.64	483	8183.45	483	14409.1	483	12082.6	483	9825.14	483	8720.07	483	7911.43	483	9385.3
484	7797.05	484	8632.88	484	13378.4	484	12886.5	484	11668	484	10503.2	484	9705.02	484	10556
485	8506.3	485	8249.58	485	11683.1	485	11583.2	485	10250.9	485	9249.22	485	11750.6	485	11506.9
486	7791.7	486	7768.75	486	10129.6	486	9754.27	486	7541.09	486	6827.7	486	14037.4	486	13908.1
487	6614.62	487	6273.42	487	9220.38	487	7879.35	487	10482.1	487	9474.97	487	11031.5	487	12361.9
488	7622.62	488	8867.51	488	9213.9	488	8835.85	488	10922.5	488	10642.4	488	12970.4	488	13586.1
489	7744.62	489	8580.87	489	7817.01	489	7820.9	489	8100.38	489	7651.84	489	11144	489	11113.8
490	6209.53	490	6760.99	490	7197.76	490	7282.03	490	10065.6	490	9939.6	490	12252.2	490	12022.3
491	7332.08	491	7587.88	491	9378.93	491	9709.9	491	12453.3	491	10751	491	17548.6	491	14426.7
492	9084.72	492	8640.17	492	13266.3	492	12240.7	492	12364	492	9989.72	492	18129.3	492	15988.6
493	10214.3	493	8943.12	493	14665.4	493	13306.9	493	14455.6	493	11552.2	493	17285.9	493	16725.4
494	10074	494	9321.04	494	14182.4	494	10739.5	494	14003.2	494	11024.4	494	16976.9	494	14670.2
495	11354.4	495	10505	495	13358.3	495	10887.9	495	11871.3	495	9279.18	495	17569.1	495	14347
496	11459.4	496	10084	496	12845.3	496	8937.04	496	9711.15	496	7548.79	496	17769.2	496	15154.1
497	10630.2	497	8297.68	497	10327.6	497	7255.76	497	8575.98	497	6196.52	497	17693.8	497	15572
498	11701.6	498	8398.04	498	9989.45	498	7489.78	498	7342.85	498	4872.59	498	17753.1	498	18088.5
499	13300.3	499	10617.2	499	8867.97	499	7342.12	499	6422.37	499	4143.06	499	16653.5	499	15431.6
500	13198.3	500	10863.2	500	8210.63	500	6450.3	500	6650.6	500	3883.58	500	14525.8	500	12302.2
501	11526.6	501	9384.06	501	12901.3	501	11975.5	501	7170.26	501	4587.12	501	16089.2	501	15167.3
502	11594.7	502	9015.36	502	10452.3	502	9661.75	502	6561.38	502	4040.1	502	17013.4	502	16554.9
503	12293.6	503	8336.38	503	12295.6	503	11625.8	503	7022.69	503	4521.3	503	15452.8	503	14788.4
504	13497.1	504	9856.72	504	13979.7	504	13494.3	504	7431.86	504	4888.05	504	16805.3	504	16494.7
505	14749.2	505	13781.5	505	15218.2	505	14461.4	505	8621.76	505	5752.25	505	15935	505	14945.5
506	15816.7	506	14048.8	506	14730.8	506	14469.9	506	8652.87	506	4836.47	506	16178.7	506	15240
507	16986.2	507	15555.1	507	14099.2	507	12977.2	507	7615.81	507	5121.19	507	17680.9	507	16743.9
508	15844	508	14420.1	508	14294.5	508	13395.9	508	7320.08	508	5378.39	508	19300	508	17353.9
509	13474.6	509	12884.4	509	15016.3	509	13732.6	509	5940.73	509	4845.55	509	20501.9	509	17837.3
510	11308.2	510	9041.65	510	14787.4	510	13413.9	510	5994.32	510	4303.6	510	18980.8	510	16937.9
511	10458	511	8290.17	511	17881.4	511	13742.6	511	5353.59	511	4364.8	511	18726.5	511	17071.8
512	9365	512	7726.91	512	18835.5	512	15731.1	512	5672.05	512	4233.93	512	17773.7	512	15517.9
513	7077.61	513	5945.79	513	18849.2	513	17221.1	513	5726.11	513	4356.65	513	15491	513	13811.9
514	5573.94	514	5338.72	514	19151.8	514	17833.3	514	5140.39	514	4150.22	514	15790.1	514	15329.6
515	9726.79	515	9717.03	515	18592.3	515	17638.8	515	4726.08	515	2916.11	515	17479.7	515	16489.7
516	8934.01	516	10608.4	516	16975.6	516	16146.5	516	5353.9	516	3184.83	516	9837.19	516	8712.45
517	8292.42	517	10230.1	517	16592.3	517	17366.8	517	5767.88	517	3553.14	517	16474.9	517	15657.1
518	7635.59	518	8757.7	518	15817.9	518	17631.6	518	6114.96	518	3114.59	518	19266.6	518	17198.2
519	8735.88	519	10534.8	519	16090.1	519	17435.7	519	7274.83	519	2939.81	519	20715.9	519	17443
520	10757.3	520	14003.3	520	14185.3	520	15019	520	9003.5	520	4696.83	520	21826.9	520	18134.2
521	11253.1	521	13893.4	521	14072.6	521	14580.4	521	11124.5	521	7273.89	521	22607.3	521	17479.4
522	10715.9	522	13974	522	15917.7	522	14445	522	11962.9	522	9217.86	522	23775.5	522	16993.7
523	10227.5	523	12829.3	523	13951.5	523	12264.7	523	12674.3	523	8509.67	523	23962.2	523	17974.3
524	11612.5	524	13029.6	524	13524.1	524	13180.5	524	14120.9	524	11319.9	524	24099.5	524	18421
525	9570.37	525	9761.96	525	13981.8	525	12868.6	525	13167.8	525	10971	525	24630.6	525	19586.3
526	9363.81	526	9032.43	526	13799.3	526	11835.2	526	10002.4	526	9171.28	526	25853.7	526	20434.5
527	10405.9	527	11807	527	12493	527	10589.4	527	13184.4	527	11964.2	527	23370.7	527	17279.7
528	10466.2	528	10286.3	528	13700.4	528	13360.3	528	15390.4	528	11739.6	528	20714.1	528	15298.1
529	8800.64	529	9092.15	529	13114.5	529	11973.6	529	13182.6	529	7555.4	529	21454.5	529	15010.9
530	7530.79	530	6769.59	530	11396.7	530	10164.1	530	9126.59	530	4237.59	530	20760.7	530	14812.4
531	5512.22	531	4281.03	531	14617.4	531	14602.9	531	6012.12	531	2522.61	531	19955.5	531	14842.3
532	9968.27	532	9492.6	532	14527.6	532	15100.6	532	4587.89	532	1798.92	532	18715.4	532	12887
533	7342.34	533	5427.89	533	15492.3	533	18025.2	533	4551.26	533	2606.63	533	17516.7	533	10994.8
534	8196.52	534	7230.09	534	17929.9	534	21285.4	534	5655.69	534	4280.69	534	16686.4	534	8606.59
535	10517.5	535	10755.6	535	21518.5	535	22798.9	535	6940.2	535	5392.01	535	23221.2	535	15521.8
536	10277.8	536	9497.93	536	25113.4	536	25891.7	536	9372.47	536	8009.3	536	23852.6	536	15630.2
537	9752.19	537	10860.4	537	29656.4	537	29606.8	537	9966.45	537	8095.68	537	23935.3	537	15232.2
538	9339.39	538	10601.5	538	33943	538	32440.9	538	8309.44	538	5940.81	538	24268.5	538	15450.5
539	9089.74	539	9195.04	539	35255.5	539	33234.6	539	7402.72	539	4908.18	539	28666.7	539	18839.8
540	8063.93	540	7769.58	540	34466	540	32731	540	7705.16	540	5523.27	540	28941.5	540	23897.2
541	7054.74	541	6265.51	541	33530.5	541	31281.8	541	8248.33	541	5454.9	541	25757.4	541	23789.1
542	6445.99	542	4748.93	542	31970.7	542	26101.3	542	8630.09	542	5362.64	542	25314.9	542	22431.6
543	5862.62	543	3377	543	26645.6	543	18471.2	543	8942.39	543	5370.25	543	24227.7	543	22376.6
544	5368.47	544	4263.21	544	29339.9	544	23362.6	544	9972.35	544	6536.62	544	23564.4	544	20720.7
545	5052.82	545	5651.05	545	27081.8	545	21812.2	545	10651.6	545	8000.64	545	23780	545	20614.8
546	4573.92	546	4726.66	546	26620.1	546	22970.1	546	8314.1	546	6286.68	546	23214.3	546	18389.5
547	5305.41	547	3944.05	547	25612.4	547	22564.7	547	9158.78	547	7286.24	547	21910	547	17390.8
548	5739.6	548	5841.02	548	27405.1	548	26160	548	10455.2	548	7934.1	548	20948.1	548	15561.6
549	7989.43	549	7473.65	549	23300.9	549	22848.4	549	10603.4	549	8390.15	549	20192.2	549	15049.5
550	8535.02	550	7682.41	550	21151.1	550	21717.7	550	9401.29	550	7231.88	550	20098.5	550	14169.3
551	9526.3	551	10597.4	551	20533.5	551	20512.7	551	8835.66	551	6848.52	551	21023.3	551	14286.4
552	8522.76	552	9787.97	552	19138.5	552	20717.3	552	8523.09	552	5932.14	552	20143.1	552	13540.3
553	9095.92	553	10292.6	553	17850.4	553	19589.4	553	8358.97	553	6605.21	553	19747.3	553	13030.5
554	10495.8	554	10327.5	554	19919	554	21041.5	554	7708.82	554	5859.98	554	20243.4	554	14087.9
555	13391.7	555	12332.2	555	23855.7	555	22721.5	555	8183.06	555	6411.73	555	20841.4	555	14098.2
556	15705	556	13570	556	23945.1	556	20704.3	556	8239.9	556	6101.9	556	20363.3	556	14431.2
557	15697	557	12086.7	557	24162.3	557	21450.4	557	7624.83	557	5739.97	557	20953.5	557	14164.2
558	15522	558	12647.9	558	25908.2	558	23054.5	558	7995.65	558	6093.98	558	20350	558	14413.9
559	13633.8	559	9464.54	559	26805.4	559	23904.6	559	8101.25	559	5621.05	559	20482.9	559	15815.3
560	11571.5	560	8371.92	560	27776.5	560	24109.5	560	8735.12	560	5944.03	560	19666.2	560	15624.4
561	9674.13	561	8543.78	561	24823.5	561	21512.6	561	9113.33	561	7171.83	561	21822.5	561	17705.4
562	9512.63	562	8358.94	562	23793.8	562	20473.3	562	10041.9	562	8242.34	562	22223.6	562	17525.9
563	8819.34	563	8175.03	563	22762.3	563	19929.8	563	10657.5	563	8265.07	563	23351.4	563	18611.9
564	8140.2	564	8543.97	564	24086.4	564	20881.8	564	11754.6	564	9223.26	564	24802.2	564	19699.4
565	8033.21	565	8495.28	565	23403.4	565	20606	565	12488.7	565	9401.45	565	24549.6	565	19538.6
566	9330.2	566	11006.8	566	24171.2	566	21145.7	566	11834.5	566	8380.02	566	24679.4	566	18844.6
567	12031.5	567	13596.7	567	26123.5	567	21545.5	567	10680.5	567	7692.32	567	23833.1	567	18295.4
568	14286.5	568	12708.4	568	24815.6	568	19929.3	568	11578.1	568	8739.22	568	23083.1	568	16989.6
569	14582.3	569	9621.65	569	24919.3	569	21822.3	569	11719.3	569	9025.33	569	22853.1	569	17269.4
570	14775.6	570	11124.2	570	25645.6	570	22524.9	570	11540.6	570	8604.07	570	22193.8	570	15031.8
571	14590.1	571	11386.9	571	28595	571	27417.6	571	11151.6	571	7183.77	571	20660.5	571	14036.2
572	14547.4	572	11240.4	572	25882.1	572	26495	572	11081.1	572	8090.38	572	19844	572	15185.6
573	13929.7	573	10949.9	573	23230.8	573	25619.3	573	8900.12	573	8533.45	573	18803.3	573	16317.8
574	14879	574	12010.2	574	19473.1	574	20291.2	574	8642.34	574	8581.42	574	16356.1	574	15109.4
575	14452.1	575	9852.41	575	21791.5	575	21440.2	575	8867.42	575	7586.07	575	15267.9	575	14435.5
576	13397.5	576	8177.66	576	29811.8	576	26875.9	576	8120.89	576	6750.01	576	14357.6	576	13046.7
577	12575.6	577	9513.83	577	31779.3	577	28782.4	577	6973.18	577	5898.38	577	15794	577	13921.6
578	9776.95	578	7021.98	578	34479.5	578	27093.5	578	8114.55	578	6737.13	578	16285.2	578	13608.4
579	7274.15	579	7828.18	579	32231.2	579	27619.5	579	10138.7	579	8189.89	579	16856.5	579	14569.6
580	6184.43	580	7304.09	580	26809.5	580	18201.6	580	11085.4	580	8541.57	580	16177.1	580	14658
581	4834.44	581	5105.07	581	25813.9	581	19102.2	581	11305	581	9514.42	581	12932.1	581	12380.5
582	5607.57	582	4921.33	582	27534.3	582	23140.7	582	12433.8	582	10613.8	582	14945.8	582	13095.3
583	6937.94	583	5315.64	583	27264.5	583	24134.5	583	13028.8	583	10236.3	583	15146	583	12968.9
584	11211.6	584	11637.7	584	23646.8	584	21903.1	584	12937.6	584	10386.5	584	15007.3	584	13160.3
585	10674.9	585	9760.12	585	21381.5	585	19264	585	12850.1	585	9357.24	585	14169.4	585	11636
586	12124.1	586	12658.9	586	19735	586	18177.9	586	13207	586	10798.7	586	13323.8	586	11956.8
587	11318.9	587	13015.5	587	15994.3	587	16552	587	12695.9	587	8866.6	587	15069.3	587	14313.1
588	8794.6	588	10043	588	13866.5	588	13425.3	588	12356.5	588	8227.07	588	14754.3	588	13129.8
589	9399.48	589	9725.59	589	12192	589	11859.6	589	15422.2	589	11579.8	589	14162	589	13792.5
590	9619.86	590	11259.8	590	12265.2	590	11703.3	590	14386.7	590	10678.6	590	17119.2	590	16258.7
591	7993.59	591	7760.38	591	13452.7	591	12819.8	591	14650.3	591	10705.5	591	17056.1	591	15789.8
592	8588.41	592	8075.85	592	14082.8	592	13202.1	592	18403.3	592	15807	592	19715.2	592	15308.6
593	9311.3	593	9167.1	593	13291.9	593	12823.6	593	17545.1	593	13522.9	593	20559.5	593	14085.2
594	10336.5	594	11028.6	594	13364.6	594	13148.3	594	16620.6	594	11616.1	594	21735.1	594	14658.8
595	10359.2	595	11395.1	595	11343.4	595	12237.8	595	16403.6	595	12423.8	595	22320	595	17134.9
596	10739.2	596	10774	596	9828.51	596	11033	596	15160.8	596	11033.6	596	22632.3	596	15571.9
597	11680.8	597	11099.3	597	7994.42	597	9966.58	597	15527.1	597	12131.7	597	24796.3	597	18336.9
598	11887.7	598	11299.7	598	5405.16	598	6696.96	598	14620.6	598	10644.4	598	22616.5	598	17084.1
599	11876	599	11075	599	7855.57	599	8955.19	599	15923.3	599	13312.5	599	21276.8	599	18338.6
600	11434.3	600	9666.97	600	10319	600	10002.2	600	15349.3	600	12937.4	600	23101.6	600	19567.3
601	9391.25	601	6996.56	601	10155.4	601	8824.41	601	16560.5	601	13330.6	601	24648.9	601	21240.1
602	10244.5	602	9548.02	602	12116.4	602	10830.5	602	17466.7	602	13917.9	602	26262.8	602	23081
603	12113.2	603	10763.2	603	12064.1	603	12632.9	603	17316.9	603	14267.2	603	27526.5	603	24912.5
604	11404.1	604	8705.44	604	9827.89	604	11479.4	604	15669.2	604	13772.7	604	27010.3	604	27216.1
605	8469.49	605	5813.06	605	10930	605	11174.8	605	14888.5	605	13754.1	605	26486.2	605	28581.1
606	15496.1	606	12003	606	10256	606	10180.3	606	13876.2	606	13848.1	606	25989	606	30512.5
607	11692.3	607	10279.1	607	8976.76	607	9544.81	607	13259.8	607	13234	607	25163.4	607	27548
608	9623.66	608	8703.02	608	10709.8	608	11439.3	608	13339.8	608	13094.4	608	24885.6	608	27440.3
609	9258.31	609	7806.25	609	13079.8	609	12711.9	609	13431.7	609	12938.6	609	24984	609	25461.4
610	6209.48	610	5450	610	13996.2	610	13504.7	610	12641.1	610	11681.2	610	26456.6	610	25489.8
611	7104.79	611	6261	611	15478.1	611	14602.1	611	11190.3	611	10791.9	611	28417.7	611	25564.9
612	7615.53	612	8785.96	612	15915.8	612	14021.1	612	9965.95	612	9886.12	612	27954.3	612	25667.6
613	7058.82	613	9147.5	613	14976.7	613	14210.8	613	10096.9	613	8480.3	613	27307.8	613	27913.3
614	7566.5	614	8513.14	614	14708.8	614	14936.5	614	10589.5	614	8258.39	614	24337	614	23752.2
615	8151.33	615	8937.64	615	13945.1	615	14389.8	615	10607.9	615	7831.08	615	20779	615	21612
616	10322.2	616	12979.9	616	15031.5	616	14627.9	616	10344.8	616	8888.44	616	25494.6	616	29294.1
617	12295	617	13250.3	617	12761.5	617	12162.4	617	12916.9	617	10854.1	617	21383.4	617	25724.6
618	13561.2	618	12873.7	618	10573.1	618	7729.16	618	15180.7	618	14097.4	618	21222.2	618	23605.6
619	13478.8	619	12739	619	8382.67	619	6744.85	619	14310.7	619	13118.2	619	21665.3	619	20160.2
620	12679.7	620	11698.3	620	7286.02	620	6399.55	620	15391	620	13814.1	620	21829.5	620	18473.3
621	12536.1	621	12824.8	621	8912.73	621	6501.53	621	12368.1	621	11187.9	621	25117.5	621	22197.8
622	11096.5	622	13482.5	622	12016.5	622	9040.43	622	10867.7	622	9328.13	622	26058.9	622	26506.3
623	10939.8	623	12839.4	623	15957.9	623	12983.5	623	7896.65	623	7973.47	623	25512.5	623	27606.7
624	8730.92	624	10334.8	624	14689	624	11773.9	624	7146.9	624	6333.17	624	26455.3	624	27957
625	9540.65	625	11634.1	625	13422	625	10532	625	5618.9	625	4550.08	625	26262.5	625	25278.5
626	9385.47	626	10315.3	626	16505.3	626	13716.3	626	8329.7	626	8015.73	626	25966.6	626	24815.1
627	8626.73	627	8990.27	627	14106.7	627	14152.8	627	6245.95	627	5361.66	627	24438.9	627	24005.3
628	6509.19	628	5743.92	628	13308.5	628	13770.9	628	6420.25	628	5490.16	628	24004.7	628	24736.7
629	5079.61	629	4163.27	629	11757.7	629	12200	629	8232.56	629	6528.89	629	22273.8	629	23617.6
630	4622.81	630	4226.75	630	10957.5	630	11278.7	630	10598.9	630	9155.46	630	20096.5	630	22401.2
631	4789.66	631	4841.28	631	11604.1	631	10246	631	10697.5	631	10585.3	631	20042.1	631	22892.4
632	3911.61	632	3726.75	632	14754.8	632	12803.9	632	8844.45	632	9904.88	632	19482.7	632	22265.9
633	4703.29	633	3063.02	633	18325.4	633	13588.9	633	7379	633	8952.81	633	16950.3	633	22579.5
634	5064.25	634	3960.79	634	22395.5	634	18602.4	634	7084.21	634	8597.07	634	16618	634	20939
635	5890.46	635	5362.78	635	24350.7	635	20432.7	635	7294	635	7885.79	635	15924.3	635	18049.2
636	6619.62	636	6458.61	636	26305.5	636	22547.6	636	7709.86	636	7211.47	636	14074.6	636	14685.9
637	7262.91	637	7560.27	637	28216.6	637	25286.8	637	9111.71	637	7381.48	637	15189.1	637	14715.2
638	6703.06	638	7627.21	638	26607.7	638	25121	638	11354.1	638	9117.96	638	14280.4	638	12702.9
639	7817.88	639	7612.58	639	23933.9	639	23400.6	639	12703.2	639	11267.3	639	14092.1	639	12146
640	8832.31	640	8069.86	640	23031.6	640	24727.7	640	11576.8	640	11503.8	640	13238.2	640	12193.2
641	8522.48	641	8289.75	641	15989.2	641	17801	641	10553.2	641	9726.45	641	12655.2	641	11093.4
642	8336.66	642	9052.2	642	12804.3	642	11602.3	642	11993.7	642	10431.4	642	13604.1	642	12219.4
643	8900.41	643	9274.88	643	13674.4	643	9022.85	643	13493.3	643	12695.6	643	14305.7	643	13905.3
644	9373.19	644	9600.07	644	14099.3	644	11379.8	644	13387.9	644	11626.7	644	14157.9	644	13125
645	9253.03	645	9027.52	645	15285.6	645	13103.9	645	11484.7	645	9371.73	645	13622.7	645	13494.3
646	10533.5	646	10424.9	646	18131.9	646	14041.6	646	11565.4	646	10123.8	646	13571.9	646	12891.2
647	11226	647	11308.9	647	20646.2	647	18617.5	647	11890.5	647	10020.5	647	14201.7	647	14480.3
648	11066.8	648	10260.3	648	21126.1	648	19331.8	648	11268	648	9238.24	648	14979	648	14671.2
649	10760.4	649	9476.25	649	24452	649	20843.6	649	11774.4	649	10144.8	649	15373	649	13570.8
650	11745	650	10381.6	650	22010.2	650	21847.5	650	11505.2	650	9724.84	650	17931.5	650	16578.5
651	11713.6	651	11178.6	651	24968.4	651	22370.9	651	9838.42	651	8564.78	651	17983.6	651	16545.3
652	11695.3	652	11860.8	652	24436.1	652	20041.4	652	8863.1	652	7177.32	652	18531.9	652	16748.2
653	11952.1	653	11708.1	653	21015.5	653	15787.4	653	8505.19	653	6455.73	653	19734.5	653	19004.7
654	12296.2	654	11497.5	654	16329.1	654	13296.8	654	10196	654	8446.79	654	18737.8	654	18580.2
655	11217.7	655	10753.7	655	13939.6	655	11825.9	655	8810.09	655	6656.39	655	17522.6	655	19392.8
656	11228.8	656	10964.3	656	13669.8	656	11653.2	656	8695.57	656	7133.37	656	17122.9	656	17416.1
657	11224.3	657	11043.8	657	13819.5	657	12545.4	657	8307.9	657	7659.78	657	17670.5	657	20242.6
658	11146.9	658	11191.1	658	15088.6	658	12926.9	658	9469.69	658	9248.73	658	17382.7	658	18120.6
659	9904.61	659	9818.77	659	15450.7	659	14833.5	659	11546.7	659	10293.7	659	18690.6	659	18892
660	10092.2	660	10156.2	660	15238.9	660	14113.3	660	11012.9	660	8604.63	660	18585.5	660	18533.1
661	9810.18	661	10392	661	17653.6	661	14576.1	661	9242.36	661	7499.86	661	17891.5	661	18775.6
662	10108.5	662	10145.6	662	15876.8	662	14967.4	662	9657.02	662	7584.15	662	14813	662	15192.2
663	11480.9	663	10360.9	663	14733.3	663	14299.5	663	9180.08	663	7180.29	663	13081	663	12736.8
664	10167.6	664	9410.77	664	13798.5	664	13597.8	664	10087	664	7954.78	664	15650.5	664	14429.2
665	8645.36	665	8058.27	665	15428.4	665	13039.4	665	8292.94	665	6631.35	665	14853.6	665	12171
666	8234.25	666	7740.87	666	18982.5	666	15919.7	666	9973.71	666	7510.39	666	13977.8	666	11755.4
667	8325.77	667	8504.76	667	18918.9	667	15896.4	667	10831.4	667	9495.54	667	12459.7	667	11305.9
668	9396.02	668	9583.12	668	21087.2	668	19373.1	668	11811.3	668	10544.6	668	12402.2	668	11546
669	9373.14	669	9621.4	669	18758.2	669	18821.7	669	11887.2	669	10545.1	669	12038.7	669	11008.8
670	8489.95	670	8738.95	670	17878.3	670	17196.9	670	10750.1	670	8777.08	670	12091.9	670	10168.9
671	10019	671	9657.98	671	16303.1	671	14718.8	671	10286.4	671	7923.79	671	10104.6	671	8641.92
672	9185.18	672	9357.19	672	15952.4	672	14104	672	10563.7	672	7430.38	672	9855.41	672	9086.76
673	9071.35	673	10369.5	673	13800.7	673	11296.4	673	10759.2	673	8382.08	673	9557.48	673	9730.67
674	7129.92	674	9115.77	674	13145.6	674	11080.4	674	10677.3	674	8530.09	674	8485.37	674	8369.08
675	9368.81	675	10997.1	675	13117.7	675	11270.8	675	11426.4	675	9218.76	675	6721.53	675	6261.73
676	9700.45	676	9805.2	676	12269.9	676	9978.62	676	11870.6	676	9580.21	676	5863.42	676	4878.7
677	8807.1	677	9771.52	677	10536.2	677	8361.9	677	12139.7	677	9853.51	677	6124.68	677	5656.6
678	10620	678	9884.65	678	11151.2	678	8893.95	678	12742.7	678	11338.5	678	6419.15	678	5763.4
679	8905.58	679	9818.87	679	12392	679	9803.31	679	11983.4	679	11561.1	679	6276.22	679	6157.08
680	7248.23	680	7304.98	680	14655.8	680	11591.1	680	11921.1	680	10538.6	680	5582.93	680	5599.34
681	6969.9	681	6204.81	681	17998.6	681	15428.4	681	11868.6	681	10349.8	681	4865.4	681	3937.56
682	8278.09	682	7123.29	682	17842.4	682	16200.5	682	11247.8	682	10087.3	682	5092.34	682	3718.9
683	7909.56	683	7007.87	683	17222.9	683	16473.1	683	10749.4	683	8496.43	683	5904.69	683	4487.25
684	7022.97	684	6007.29	684	13997.4	684	14025.1	684	8958.4	684	7147.97	684	7937.09	684	6271.42
685	6077.24	685	5483.08	685	13726.3	685	12372.8	685	7894.42	685	6215.06	685	7873.98	685	6999.87
686	4597.87	686	3774.51	686	11118.1	686	10123.5	686	9787.78	686	6872.36	686	7725.98	686	5205.66
687	5456.14	687	4840.24	687	9633.91	687	7413.02	687	8245.38	687	6292.63	687	8394.08	687	6549.31
688	4332.94	688	4129.81	688	10609.1	688	7340.73	688	8236.24	688	5797.23	688	8914.43	688	8065.75
689	5176.18	689	5076.89	689	11852.2	689	8684.09	689	7698.35	689	5434.81	689	7419.12	689	5924.04
690	6000.52	690	5693.57	690	11347.7	690	11150.4	690	7759.4	690	5337.45	690	7337.91	690	5323.12
691	7000.12	691	6255.27	691	9666.34	691	9257.44	691	8096.76	691	5549.69	691	8137.36	691	6657.83
692	8392.37	692	8257.81	692	9229.33	692	8746.24	692	10938	692	8244.54	692	9216.77	692	8279.22
693	8576.58	693	8064.93	693	9339.71	693	9151.22	693	9266.44	693	6608.1	693	9560.07	693	8896.58
694	9220.88	694	8872.43	694	10076.6	694	9073	694	11141.1	694	8781.19	694	11050.1	694	10704.6
695	9968.42	695	9758.29	695	11848.2	695	11095.6	695	10876.9	695	8636.62	695	9781.98	695	7418.52
696	14076.5	696	12342.3	696	12353.3	696	11261.6	696	12055.1	696	8749.28	696	9404.01	696	6469.98
697	15476.9	697	13612.7	697	12228.8	697	9814.22	697	11411.1	697	7988.65	697	8853.06	697	6276.9
698	18371.4	698	17951	698	12234.1	698	8752.48	698	10482.3	698	7491.77	698	8559.48	698	4841.85
699	20926.4	699	18867.1	699	12425	699	10133.6	699	7731.24	699	4313.5	699	5682.14	699	3698.33
700	19741.6	700	17570	700	12521	700	11121.9	700	7859.88	700	5068.56	700	5759.23	700	4313.48
701	18853.5	701	15202.3	701	13409.2	701	13662.4	701	8162.89	701	5089.04	701	3948.21	701	3471.96
702	17344.9	702	12841.8	702	15437.4	702	16849.8	702	7868.42	702	4640.57	702	4417.29	702	3468.97
703	16670.7	703	12462.3	703	14047.3	703	15620.8	703	7425.46	703	4607.67	703	5514.25	703	3368.95
704	14394.8	704	10658.6	704	11787.3	704	13269.1	704	6688.84	704	4618.87	704	7219.57	704	3888.82
705	13262.2	705	9978.46	705	9470.44	705	9325.09	705	7714.64	705	5419.53	705	9320.99	705	5065.26
706	12805.3	706	10732.3	706	9818.26	706	8460.62	706	9028.27	706	6875.42	706	7865.94	706	4862.1
707	11540.2	707	9698.24	707	10601.4	707	10313.7	707	8780.55	707	7584.57	707	10791.1	707	6764.41
708	11337.9	708	10966.2	708	12624	708	11258.8	708	7580.6	708	6385.97	708	9911.34	708	7128.67
709	11806	709	11255.2	709	11982	709	9854.14	709	7775.49	709	7037.38	709	11236.1	709	6980.04
710	11719	710	9812.52	710	10653.3	710	8521.62	710	7042.26	710	5550.28	710	12892.4	710	10372.8
711	12538.5	711	10525.5	711	10393.9	711	7880.24	711	7023.5	711	5569.2	711	13570.9	711	12530.3
712	13505.9	712	12268.9	712	12706.3	712	11196.3	712	5971.39	712	5316.12	712	13306.5	712	13371.4
713	13162.6	713	12210.5	713	9869.32	713	8756.55	713	5529.28	713	4620.71	713	13092.3	713	14004.4
714	13400.7	714	12460.3	714	10724.7	714	9414.8	714	5173.22	714	4322.12	714	11039.6	714	11736.2
715	13287	715	11908.7	715	8398.21	715	7246.96	715	5940.93	715	5809.63	715	12323.1	715	11480.4
716	12105.4	716	11121.4	716	7698.21	716	6517.08	716	6687.87	716	6060.69	716	12699.9	716	10386.7
717	11277.6	717	11100.7	717	6447.86	717	5049.73	717	6823.16	717	5759.24	717	13574.8	717	11601.9
718	11648.2	718	10763.3	718	6522.84	718	4951.68	718	7686.61	718	5499.29	718	13863.8	718	11345.2
719	12488.1	719	11510.4	719	5737.94	719	4674.05	719	9021.18	719	6244.86	719	13213.3	719	11996.2
720	12406.9	720	11922.7	720	5834.16	720	4526.87	720	10410.3	720	8670.98	720	15490.8	720	14128.8
721	11968.9	721	11404.3	721	6452.04	721	4977.52	721	10533.1	721	8964.51	721	15930.8	721	13726.2
722	11044.2	722	10761.6	722	6353.74	722	4757	722	8705.38	722	7259.53	722	15403	722	14043.9
723	10309.2	723	11065.3	723	7255.55	723	5303.72	723	6905.02	723	5770.16	723	15397.9	723	13489.3
724	10706.4	724	12172.5	724	7866.46	724	5902.59	724	7248.67	724	6673.61	724	14857	724	13241.7
725	11475.4	725	13308.6	725	8116.38	725	6427.56	725	8645.78	725	9285.4	725	12482.8	725	10886.4
726	12245.6	726	13868.4	726	7111.7	726	5911.14	726	8809.44	726	8847.78	726	11135.5	726	9071.08
727	12723.3	727	12724.8	727	6634.76	727	6119.6	727	10226.7	727	9416.37	727	10588.5	727	10335.2
728	12795.2	728	11689	728	7621.45	728	7328.23	728	13275.6	728	11825.2	728	12907.5	728	11625.3
729	12911.3	729	11761	729	8174.52	729	7181.19	729	14639.9	729	12898.1	729	12675.2	729	11198
730	13368.7	730	12269.8	730	8794.82	730	7468.45	730	15014	730	12257.5	730	12553.2	730	10566.2
731	13190.6	731	11775.7	731	10697.4	731	8578.67	731	15208.6	731	13215	731	12229.9	731	9524.28
732	12842.8	732	10560.8	732	13105.6	732	9887.61	732	14894.6	732	13585	732	13245.4	732	11927.3
733	12702	733	10418.6	733	15185.6	733	12173.2	733	14443.6	733	13802.7	733	13908	733	13367.5
734	12805.9	734	10649.6	734	21322.1	734	19118.9	734	14583.1	734	13370.1	734	13742.2	734	12013.9
735	10963.4	735	8890.14	735	20560.3	735	20798.3	735	14611.7	735	11850.1	735	14774.4	735	13116.2
736	8859.07	736	7025.84	736	17879.7	736	20345.6	736	14245.4	736	10624.3	736	14456.2	736	11985.2
737	9059.48	737	7213.9	737	10368.4	737	13201.3	737	14577.3	737	11872.2	737	12771.7	737	11727.8
738	10526.9	738	8041.16	738	13166.9	738	16855.6	738	13298.7	738	11041.3	738	12671.2	738	10603.6
739	11203.4	739	9120.31	739	10803	739	14126.3	739	11498.8	739	10114.6	739	12339.3	739	13186.1
740	11951.7	740	10630	740	12477.6	740	15688.3	740	12734.7	740	11551.6	740	12156.9	740	13814.8
741	13242.5	741	11615	741	11254.6	741	13398	741	10015.4	741	9033.27	741	12455.7	741	14752.8
742	14428.6	742	12946.9	742	8623.16	742	10240.1	742	9816.49	742	8261.51	742	12773.1	742	13902.6
743	14500.4	743	12622.1	743	9205.59	743	9532.59	743	10234.5	743	8559.52	743	11464	743	11799.9
744	14945.7	744	13045.6	744	9342.99	744	8939.93	744	10396.8	744	8882.72	744	9716.69	744	9462.38
745	15350.7	745	14029.2	745	9811.47	745	9129.1	745	9197.14	745	7880.43	745	8275.72	745	8622.98
746	15122.5	746	14302.1	746	9402.94	746	8002.48	746	7912.11	746	6810.57	746	7212.25	746	6748.61
747	14094.2	747	14000.7	747	9149.09	747	8254.55	747	6761.63	747	5493.56	747	6819.66	747	7108
748	12960.1	748	13629	748	10066.4	748	8872.22	748	7033.34	748	5826.25	748	7435.57	748	8078.66
749	12271	749	13050.6	749	10281	749	8266.06	749	7724.86	749	6815.22	749	7284.36	749	6752.54
750	12001.3	750	10628.4	750	9501.27	750	6548.67	750	8682.54	750	7396.82	750	6957.72	750	7617.32
751	9351.53	751	7712.7	751	9888.3	751	6394.06	751	8282.4	751	6710.9	751	7168.14	751	8049.39
752	7533.97	752	5759.1	752	8829	752	5976.58	752	10039.5	752	7865.04	752	7314.69	752	8201.33
753	10072.2	753	8309.58	753	7960.17	753	5417.01	753	12446.6	753	11009.5	753	7359.19	753	9009.75
754	8224.75	754	6673.86	754	7185.67	754	4552.38	754	11571.9	754	10337.7	754	7367.37	754	8297.02
755	8380.99	755	6662.14	755	8191.65	755	5893.3	755	11407.7	755	10755.4	755	6660.28	755	7102.2
756	9700.45	756	7379.23	756	10336.5	756	8337.17	756	12706.8	756	12921.3	756	7636.6	756	8514.98
757	11013.8	757	10120.7	757	11585.8	757	8925.33	757	12025.7	757	11529.5	757	6869.97	757	7496.89
758	10590.2	758	11984.8	758	12730.4	758	9462.53	758	11195.9	758	10349.6	758	7189.98	758	8607.69
759	9455.46	759	10995.1	759	15756.9	759	11138.3	759	10786.2	759	9787.96	759	6944.28	759	8594.25
760	10172.9	760	9101	760	15948.6	760	12092.4	760	11250.8	760	8981.97	760	8019.62	760	9850.73
761	9299.45	761	8945.45	761	17755.7	761	13860.9	761	10836.2	761	9078.86	761	8447.71	761	9194.7
762	10446.9	762	9168.76	762	20310.4	762	17050.8	762	11052.3	762	9663.38	762	9361	762	10381.6
763	10478	763	10595	763	20410.9	763	18228.6	763	11635.8	763	9561.02	763	10159.1	763	9757.39
764	10179.8	764	10669.1	764	20440.4	764	18119.5	764	12507.7	764	10642.9	764	12083.2	764	11110.4
765	9858.28	765	10285	765	18134.9	765	16208.8	765	13054.6	765	12176.3	765	12688.6	765	11162
766	10540.5	766	10804.2	766	17427.7	766	15183.1	766	12925.7	766	12175	766	13201	766	11412
767	9000.87	767	7213.38	767	17605.3	767	16058.2	767	12402.5	767	11301.7	767	13389.2	767	12433.5
768	8837.17	768	7733.13	768	17159.8	768	16110.4	768	12209.5	768	10782.9	768	13139.8	768	11634.3
769	9094.11	769	8841.46	769	17777.2	769	16800.9	769	11129.6	769	9597.62	769	13071.4	769	12552.6
770	12211.1	770	10509.1	770	17420.8	770	16362.5	770	13293.4	770	11392.1	770	13160.3	770	13579.3
771	16416.1	771	11883	771	16858.4	771	16286.9	771	12345.3	771	10388.2	771	12450.9	771	13117.6
772	14412	772	13851.7	772	15381.1	772	14474.8	772	12190.5	772	10768.4	772	13344.4	772	14446.2
773	23387.1	773	19466.3	773	16479.5	773	14291.3	773	11718.2	773	11256.2	773	12218.8	773	13013.3
774	16301.8	774	12252.9	774	17134.8	774	15043.9	774	10219	774	9227.83	774	13054.8	774	13535
775	19488.3	775	16629.7	775	18948.6	775	14260.5	775	8856.93	775	7903.9	775	13155.7	775	12945.8
776	22587.1	776	18935.6	776	18001.8	776	14899.7	776	9371.14	776	8529.74	776	13011.6	776	11974.3
777	17524.1	777	14646.2	777	17877.5	777	15830.1	777	11801	777	11511.6	777	13579.5	777	12020.1
778	16002.3	778	12551.3	778	17666.3	778	16197.2	778	14889.3	778	12932.7	778	12171	778	10228.1
779	16736.6	779	12865.1	779	16887.1	779	16003.4	779	14906.7	779	12238.6	779	12586.7	779	10331.4
780	20300.6	780	16632.7	780	16349.7	780	14853.3	780	14063.3	780	11679.4	780	11365.4	780	10373
781	16671.7	781	12799.7	781	15138.9	781	14605.9	781	13252.9	781	10891.2	781	10994.3	781	10585.3
782	21018.2	782	17522	782	13962.6	782	13943	782	12645.6	782	10109.7	782	9953.58	782	9930.43
783	22309.5	783	18635.5	783	12156.7	783	12210.6	783	12592.2	783	10770.8	783	9838.42	783	10143.9
784	19830.3	784	17079.5	784	10304.2	784	10776.8	784	12126.9	784	11046.5	784	8594.77	784	8316.68
785	22093	785	19251.2	785	8878.91	785	9716.57	785	12209.4	785	11149.5	785	8344.48	785	7575.79
786	20112.8	786	16428	786	10924.5	786	12472	786	12587.7	786	10045.4	786	8412.88	786	7625.62
787	17538.7	787	15204.1	787	14496.2	787	15451.2	787	12419.5	787	10368.3	787	8809.08	787	7993.91
788	16158.3	788	14717.9	788	12997.9	788	13682.1	788	11445.5	788	9972.25	788	8881.46	788	8642.05
789	14438.6	789	13248.7	789	15288.1	789	15909.1	789	10721.4	789	8769.99	789	8755.9	789	8348.79
790	15149.2	790	14173.2	790	13546.5	790	13982.6	790	10110.9	790	8641.5	790	8468.69	790	8884.69
791	15190.4	791	13206.6	791	12445	791	12854.8	791	9501.65	791	8031.19	791	8417.28	791	8765.06
792	16606.5	792	14131.8	792	11382.8	792	12550.7	792	7799.13	792	6717.44	792	8488.11	792	9649.44
793	18388.4	793	16429.5	793	11561.9	793	11241.1	793	6515.81	793	5863.49	793	8807.58	793	9392.49
794	18734.2	794	18167.3	794	11407.2	794	10751.5	794	8192.71	794	7297.72	794	9233.66	794	7656.24
795	16875.4	795	17793	795	14221.6	795	14002.4	795	7268.87	795	5812.07	795	8833.3	795	7344.77
796	16185.9	796	18993.7	796	13329.8	796	12623.1	796	6434.15	796	5521.23	796	7646.57	796	6088.69
797	16160.5	797	16309.3	797	13565.8	797	13451.8	797	7066.6	797	6833.77	797	8727.01	797	6640.64
798	16274.5	798	18576.1	798	13460.3	798	13260.3	798	7433.45	798	6694.84	798	10785.1	798	8653.93
799	15801.2	799	19073.7	799	13191	799	13071.5	799	6933.78	799	6909.94	799	12130.2	799	11215.1
800	16088	800	18291.7	800	11764.7	800	11432.2	800	7113.16	800	5674.09	800	11872.6	800	10156.3
801	15574.8	801	18995.2	801	10379.8	801	10304.3	801	8047.68	801	5157.94	801	10584.8	801	9960.12
802	15314.8	802	16621.7	802	11222.1	802	11200.7	802	8439.04	802	6673.73	802	9924.22	802	10067.1
803	14057.7	803	15896.7	803	9306.96	803	7654.19	803	10464.5	803	9193.42	803	9201.89	803	8752.55
804	11034	804	12538.7	804	8917.74	804	7933.74	804	9470.49	804	7265.25	804	9144.33	804	8195.31
805	10146.4	805	10733.1	805	8406.35	805	7190.31	805	6679.07	805	3928.65	805	9118.77	805	9814.66
806	8374.02	806	10145.5	806	8535.47	806	7374.84	806	3164.66	806	932.368	806	10576.4	806	10678.2
807	7588.9	807	9831.67	807	8118.11	807	6196.75	807	2542.64	807	1482	807	10212.6	807	9491.18
808	7166.93	808	8370.83	808	7904.52	808	5726.96	808	2990	808	1927.95	808	10381.1	808	9092.54
809	8439.7	809	8425.15	809	8609	809	6073.85	809	3905.42	809	2956.44	809	10061.2	809	8851.3
810	8814.17	810	8982.35	810	9846.32	810	7166.25	810	3343.47	810	2066.91	810	9257.95	810	8084.98
811	8427.77	811	8717.75	811	10432.1	811	8258.49	811	6788.72	811	5148.64	811	9895.39	811	9393.64
812	9120.91	812	8137.52	812	11098.7	812	9648.07	812	5864.61	812	4204.07	812	9403.08	812	9850.25
813	9403.54	813	7567.75	813	11775.9	813	9885.56	813	6592.9	813	4415.08	813	11002.9	813	12033.9
814	10231.5	814	8355.3	814	12855.1	814	10040.4	814	6106.34	814	3905.2	814	11931.7	814	12455.5
815	11630.7	815	9272.14	815	13907.8	815	10401.7	815	7719.97	815	4951.71	815	12853.9	815	13984.1
816	12520.9	816	11349.9	816	14512.5	816	11835.7	816	6377.7	816	4372.09	816	13120.2	816	15524.1
817	12412.5	817	11298.8	817	14999	817	12541.3	817	5865.11	817	4529.45	817	13212.8	817	16157.5
818	12251.6	818	11340.7	818	16081.4	818	12225.7	818	5929.73	818	4106.3	818	12309.7	818	15207.3
819	12973.5	819	12334.7	819	16539.1	819	13282.4	819	6916.89	819	4815.01	819	11714.2	819	13409.1
820	11235.6	820	11549.4	820	15702.4	820	14321.7	820	7279.46	820	5559.06	820	11102.7	820	12018.9
821	12769.5	821	13106.1	821	18352.2	821	15754.7	821	6411.59	821	4197.79	821	9749.08	821	9652.29
822	11923.1	822	12788.7	822	17565.5	822	16347	822	7768.74	822	5149.84	822	8485.41	822	7582.33
823	10217.7	823	10300.9	823	21257.4	823	19935.1	823	7566.88	823	5038.74	823	8040.7	823	6744.21
824	10183.9	824	10802.8	824	22790	824	20996.1	824	8749.45	824	5429.14	824	8467.15	824	7098.67
825	11753.7	825	11692.6	825	20637.8	825	19490.4	825	8129	825	5100.29	825	8239.02	825	6441.16
826	12921.3	826	11811.4	826	19923.8	826	20352.5	826	9123.33	826	6351.62	826	8489.4	826	6947.31
827	13227.1	827	11180.3	827	23784.7	827	23046.6	827	10424.8	827	8300.39	827	7755.24	827	6307.39
828	11775.9	828	8950.11	828	28023.7	828	24729.8	828	11102.5	828	9507.17	828	8697.28	828	8074.76
829	10172.8	829	8244.11	829	27764.2	829	21812.8	829	12582.1	829	11070.1	829	8931.67	829	7320.13
830	8595	830	7768.79	830	24482.8	830	17207	830	13428.3	830	10908	830	8253.02	830	7424.95
831	7464.72	831	6609.82	831	26571.6	831	20247.9	831	13461.2	831	10532.7	831	7318.23	831	6821.83
832	8976.6	832	7862	832	22623	832	16748.5	832	13767.4	832	10549.1	832	6520.17	832	6349.39
833	9370.47	833	9093.44	833	18317.2	833	13510.1	833	13822.9	833	11848.7	833	6118.6	833	4583.21
834	7999.69	834	6683.15	834	14826.2	834	11348.7	834	14129.2	834	11666.9	834	6852.45	834	5700.55
835	6359.38	835	4073.44	835	16680.3	835	12718.2	835	14020.2	835	10967.7	835	8037.74	835	7258.22
836	6630.59	836	4215.99	836	16730.9	836	12526.5	836	12889	836	10681.3	836	7604.98	836	6773.44
837	7552.26	837	5743.76	837	14071	837	11292.1	837	12472.8	837	11006.3	837	7837.42	837	9520.53
838	8507.22	838	7438.44	838	13418	838	10285.1	838	11098.4	838	9032.52	838	8145.21	838	10204.5
839	8389.41	839	7662.67	839	12985.3	839	10689.4	839	9967.89	839	7474.84	839	11069.6	839	11866
840	8552.35	840	7399.41	840	14468.1	840	11597.5	840	10359.4	840	8639.63	840	12387.4	840	12233.3
841	8267.76	841	10030.5	841	12845.9	841	11095.8	841	9512.92	841	7248.23	841	14882	841	14799
842	7380.95	842	9890.28	842	12907.9	842	12299.6	842	8892.93	842	7360.03	842	14441.5	842	14996
843	7932.86	843	7668.78	843	14113.1	843	11730.5	843	8511.76	843	6846.4	843	13602.3	843	12277.1
844	8087.67	844	9427.2	844	14021.4	844	12427.4	844	7955.19	844	6390.88	844	16142.5	844	12964.6
845	7125.1	845	8094.69	845	13526.7	845	12380.1	845	7304.04	845	5773.6	845	17471.5	845	15395.9
846	6927.97	846	7748.87	846	14775	846	11588.6	846	6561.41	846	4870.55	846	19636.4	846	16931.9
847	8318.96	847	9074.08	847	14690.1	847	11010.5	847	6143.84	847	4804.61	847	21612.6	847	20206.8
848	8153.96	848	9143.63	848	14457	848	9754.55	848	6677.6	848	5865.37	848	21352.1	848	19096.6
849	7310.81	849	8230.02	849	14070.2	849	8634.28	849	6940.62	849	5381.37	849	20103	849	18272.1
850	6051.43	850	6106.16	850	12776.1	850	8166.41	850	6656.69	850	5487.98	850	20233	850	18113.9
851	6431.56	851	6498.64	851	11805.4	851	7492.78	851	8308.49	851	7008.5	851	19724.4	851	15736.4
852	6581.39	852	6902.8	852	14278.7	852	11256.1	852	11263.2	852	9464.6	852	18373.1	852	15302
853	5270.42	853	5965.6	853	11799.4	853	10090.1	853	12454.8	853	9241.28	853	18249.8	853	15251.4
854	5019.01	854	5075.67	854	13358.6	854	10831.2	854	9959.25	854	5922.52	854	19266.2	854	15478
855	4472.46	855	4747.5	855	14742.2	855	10630	855	9842.92	855	6550.1	855	20953.4	855	16838.4
856	6863.87	856	5521.07	856	15491.8	856	10475.3	856	8424.15	856	6281.1	856	21804.1	856	17787.3
857	5267.1	857	5060.32	857	13498.2	857	10407.9	857	8233.85	857	6230.21	857	23514.7	857	18950.7
858	5933.9	858	5588.93	858	11256	858	9375.25	858	8536.24	858	6679.22	858	23217.6	858	19579.6
859	8829.88	859	7006.3	859	10235	859	8931.23	859	8586.36	859	6246.89	859	21762.4	859	17226.2
860	9578.06	860	6675.24	860	9773.34	860	10316	860	8504.76	860	5974.84	860	24631.7	860	21793.5
861	9976.31	861	7069.19	861	9010.22	861	9894.08	861	7634.88	861	5996.82	861	21886.4	861	19529.9
862	11897.1	862	8596.64	862	8987.37	862	9255.99	862	8034.52	862	6515.35	862	20626	862	19057.6
863	13779	863	11884.3	863	11001.2	863	13364.2	863	6188.96	863	6026.64	863	19637.3	863	19295.4
864	14163.1	864	12814.5	864	12333.6	864	13018.9	864	7335.81	864	5760.16	864	22306.1	864	19550
865	12608.9	865	13878.2	865	11734.1	865	11295.2	865	6189.22	865	6041.23	865	24590.7	865	23220.6
866	9654.17	866	11088.4	866	10153.9	866	8532.1	866	5060.24	866	5738.58	866	25742.4	866	23899.5
867	8061.65	867	7387.66	867	8696.53	867	7098.96	867	4166.34	867	4523.36	867	24882.5	867	21883.9
868	7543.38	868	6844.3	868	8837.33	868	8434.42	868	3605.4	868	4287.6	868	24899.3	868	21163.6
869	8376.69	869	7883.31	869	10610.4	869	10595.7	869	3241.7	869	3423.53	869	24388.6	869	19609.2
870	8393.82	870	9227.72	870	11475.9	870	9810.85	870	3296.59	870	2989.1	870	22997.4	870	18053.1
871	7933.13	871	8306.04	871	10387.4	871	8186.8	871	3520.36	871	3147.76	871	27977.1	871	25088.5
872	6325.11	872	6884.55	872	9111.05	872	6787.11	872	3357.16	872	3209.73	872	25533.7	872	22067.4
873	6827.3	873	7550.44	873	9667.49	873	8153.07	873	3477.38	873	2855.57	873	27258.3	873	23347.7
874	7098.3	874	7256.5	874	11820	874	11594	874	3520.45	874	2992.11	874	30769.1	874	25312.8
875	6868	875	7086.99	875	11569.6	875	11894.7	875	4652.66	875	4566.91	875	32759.9	875	26512
876	7851.79	876	8402.33	876	11817.1	876	12551.7	876	4915.25	876	5064.49	876	33668.7	876	30286.5
877	9410.1	877	8833.06	877	11540.6	877	12114.2	877	4582.78	877	4079.28	877	36023.3	877	31173
878	10174.5	878	8904.51	878	12807.9	878	13706.4	878	4988.14	878	3806.18	878	37019.4	878	35037.1
879	10941.3	879	10539.4	879	15677.5	879	17028.7	879	7056.81	879	6091.41	879	39197.1	879	36609.3
880	10505.5	880	8861.09	880	19928.3	880	20058.2	880	8090.97	880	7332.37	880	39554.1	880	35803.3
881	9530.46	881	7620.17	881	23160.1	881	20802.6	881	8139.28	881	7112.8	881	41623.7	881	36399.3
882	7986.18	882	5043.52	882	23674.1	882	17589.3	882	9127.78	882	7092.55	882	40798.1	882	35220.7
883	7723.26	883	5534.06	883	21623.8	883	16331.8	883	8919.48	883	6192.27	883	39232	883	35802.2
884	6616.82	884	4780.51	884	23021.8	884	20472.9	884	8065.64	884	5624.68	884	37738.8	884	37160.8
885	6170.63	885	5056.34	885	19600.3	885	21376.6	885	7841.19	885	6379.56	885	35950.7	885	35913.9
886	5837.56	886	5998.24	886	20306.5	886	17854.8	886	7665.27	886	6647.63	886	37746	886	37500
887	6803.66	887	7145.25	887	17560.7	887	15868.3	887	8143.28	887	7238.68	887	40437.2	887	37584
888	7655.64	888	9276.31	888	16809.9	888	16416.3	888	6943.97	888	5915.2	888	39515.8	888	34478.4
889	9063.47	889	11018.1	889	14161.9	889	15306.7	889	7077.7	889	5820.9	889	38008.7	889	31798.3
890	11487.2	890	13706.8	890	13142.8	890	14342.7	890	4935.75	890	3909.8	890	33667.1	890	27249.3
891	11439	891	13160.3	891	12901.1	891	12978.4	891	5939.74	891	5311.63	891	26770.2	891	20608.5
892	12019.1	892	12869.3	892	10630.6	892	10113.7	892	4803.29	892	3742.92	892	19765.3	892	16951.9
893	13750.3	893	14357.6	893	13202.5	893	12413.1	893	4676.82	893	3622.64	893	13983.2	893	10654
894	13766.2	894	14270.6	894	12733.8	894	10583.4	894	6057.65	894	4657.42	894	13201.7	894	9414.04
895	12883.6	895	12414.3	895	12379.4	895	8806.41	895	4371.89	895	3120.41	895	12005.3	895	7806.5
896	10025.3	896	10018.5	896	12797.1	896	8655.33	896	4475.45	896	3005.28	896	10216.3	896	8190.76
897	8766.54	897	8616.36	897	12615.8	897	8289.52	897	4705.66	897	2571.03	897	11298	897	10624.1
898	9254.76	898	8886.88	898	13247.7	898	8427.43	898	5436.81	898	2699.21	898	11176.4	898	9229.55
899	11213.2	899	11225.8	899	14454.9	899	9644.36	899	5265.07	899	2732.59	899	12025	899	7363.33
900	12488.6	900	12673.1	900	14894.1	900	12361.3	900	6224.62	900	3407.09	900	14293.8	900	11176.9
901	11357.4	901	11455.6	901	12881	901	11605.9	901	6294.39	901	4835.66	901	13666.4	901	12018.6
902	13693.7	902	13961.7	902	11143.5	902	9454.42	902	5653.92	902	4701.84	902	12342.3	902	8179.81
903	13917	903	12742.6	903	11313.6	903	10327.6	903	5926.43	903	5235.22	903	13729.3	903	13037.7
904	13286.7	904	11595.3	904	11968	904	12401.7	904	6101.82	904	4495.64	904	14046.8	904	12866.5
905	12224.6	905	11909.7	905	11473.4	905	13310	905	9201.85	905	6888.91	905	13473.7	905	13628.6
906	10936.6	906	11318.3	906	10498.2	906	10634.4	906	9254.61	906	7522.73	906	14154.6	906	14231.6
907	11092.3	907	10132.6	907	10880	907	10187.6	907	8375.51	907	7113.15	907	13719.2	907	14515.6
908	11004	908	10328.9	908	11713.3	908	10544.3	908	7345.88	908	6430.71	908	14941.9	908	13738.9
909	11353.3	909	10497.7	909	11264.2	909	11045.2	909	6200.98	909	5792.9	909	15011.3	909	17088
910	11374.8	910	10604.3	910	9643.76	910	8991.4	910	4701.39	910	4259.6	910	16050.5	910	20423.6
911	10930.8	911	10085.1	911	8050.15	911	7650.06	911	3945.36	911	2927.19	911	17147.2	911	22148.1
912	11317.7	912	10508.8	912	7718.49	912	8907.07	912	4652.19	912	3943.02	912	19205.9	912	25233.5
913	11458.4	913	10682.6	913	9931.53	913	10018.7	913	7549.62	913	6618.38	913	17974.7	913	19552.6
914	11598	914	10588.1	914	10956.1	914	9223.2	914	9628.62	914	8921.67	914	19745.6	914	23816.5
915	11405.1	915	10026.6	915	10535.5	915	9402.5	915	9943.33	915	9734.73	915	14790.3	915	13372.7
916	9976.5	916	9854.89	916	14040.4	916	12465.1	916	11463.4	916	10854.5	916	14367.8	916	11668.3
917	8284.48	917	7811.21	917	15044.8	917	14080.9	917	12187.1	917	10799.9	917	14398.2	917	13531
918	7702.63	918	6148.29	918	16613.4	918	13724	918	12478.7	918	11497.7	918	13690	918	12923.6
919	7684.12	919	6587.7	919	13563.4	919	9803.12	919	12527.1	919	11846.6	919	12882.6	919	11898.6
920	7457.38	920	5530.32	920	10439.5	920	7638.59	920	15055.2	920	12937.4	920	13636.7	920	11414.6
921	8449.37	921	6764.91	921	10218	921	8452.56	921	13926.1	921	11541.2	921	10086.4	921	8543.4
922	9642.15	922	8825.31	922	7087.87	922	6687.94	922	12049.8	922	9739.83	922	11272.2	922	10294.7
923	10455.8	923	9021.38	923	5077.23	923	3823.06	923	10539	923	8155.77	923	11496.6	923	11703.2
924	11951.1	924	9464.47	924	7080.75	924	4135.86	924	9269.67	924	6619.11	924	11289.7	924	11064.5
925	8488.26	925	6417.9	925	10058.7	925	6811.28	925	8610.9	925	6891.1	925	10952	925	11424.8
926	11947.8	926	9520.05	926	10490.3	926	9373.2	926	10430.8	926	8266.8	926	11726.3	926	10883.6
927	12283.9	927	12766.3	927	8444.46	927	7588.82	927	8509.35	927	6777.73	927	11317.3	927	10207.4
928	11397.9	928	12122.7	928	9261.24	928	8061.89	928	8122.84	928	6241.59	928	11663.1	928	9342
929	11414.1	929	11669.6	929	12219.6	929	11494.8	929	9343.32	929	6983.5	929	12261.5	929	9165.66
930	11479	930	12563	930	13328.8	930	13898.1	930	9972	930	7160.38	930	11191.1	930	8604.26
931	10703.9	931	12290.1	931	14390.3	931	14585.2	931	9720.93	931	6587.05	931	9976.31	931	8215.18
932	10323.2	932	12188.9	932	12076.8	932	11889.3	932	10240.1	932	6568.85	932	9316.36	932	7487.99
933	10503.3	933	10913.1	933	10607.6	933	11167.1	933	11344.5	933	7507.69	933	9026.13	933	8002.83
934	10034.1	934	10136.9	934	12498.7	934	13116.3	934	11774.6	934	8204.27	934	8378.67	934	7959.81
935	11077.4	935	10995.3	935	10504.6	935	11056.3	935	12093.2	935	8556.66	935	9044.26	935	8171.96
936	13385.1	936	13189.3	936	10010.2	936	10261.6	936	12535.9	936	8505.98	936	9937.41	936	6953.98
937	14873.5	937	15108.8	937	11286.7	937	11812.3	937	11759.4	937	7802.5	937	10888.5	937	8663.6
938	12971.4	938	13585.1	938	10885.6	938	10886.6	938	9866.04	938	7107.44	938	12147.9	938	11167.2
939	10665.3	939	10982.2	939	10532.9	939	10830.7	939	11113.8	939	7908.55	939	14525.8	939	13225.8
940	9155.17	940	8644.66	940	10496	940	10345.1	940	13576.3	940	9961.47	940	13470.3	940	12479.8
941	9670.66	941	8767.5	941	10609.1	941	9846.71	941	11236.4	941	8254.05	941	11031.5	941	11769
942	9766.79	942	8747.89	942	10850.1	942	9886.35	942	12925.7	942	9772.88	942	10934.9	942	12227.1
943	8515.18	943	6908.64	943	11151.4	943	8579.84	943	13655.3	943	9836.87	943	8660.92	943	9535.51
944	10669	944	9628.8	944	13288.5	944	9444.85	944	14884.7	944	9945.58	944	8855.33	944	8506.24
945	9953.56	945	8732.47	945	15919.5	945	12807.3	945	16436.8	945	11315.9	945	9391.49	945	9402.05
946	10998.9	946	9643.71	946	16501.4	946	14265.9	946	18371.8	946	13464.1	946	9091.41	946	7457.64
947	10383.4	947	9200.01	947	16985.7	947	13498	947	18030.9	947	13338.4	947	8592.78	947	7265.9
948	14080.7	948	13535.9	948	15826.9	948	11589.1	948	18046.6	948	13976.3	948	7660.77	948	7566.28
949	12421.3	949	11112.3	949	15909	949	12538.1	949	16567.3	949	12581.1	949	7390.58	949	7116.44
950	12533.8	950	11820.5	950	15920.8	950	11775.4	950	15683.6	950	12320.4	950	7496.23	950	7234.43
951	12217.5	951	10905.7	951	16772.5	951	12909.9	951	16568.4	951	13110.7	951	7823.11	951	7627.04
952	13242	952	11763.4	952	15996.1	952	13760.9	952	12864.6	952	10015.9	952	8114.32	952	5649.65
953	16094.4	953	17526	953	16535.2	953	13779.2	953	10982.8	953	8982.98	953	10350.3	953	9240.66
954	15569.6	954	16476.6	954	17245.6	954	14047.8	954	11434.7	954	8921.79	954	9819.73	954	8026.79
955	14969.9	955	16163.5	955	18239	955	14355.5	955	10509.7	955	8426	955	11230.6	955	8964.25
956	12318.9	956	11634.3	956	20648.6	956	16646.8	956	10587.4	956	8238.87	956	12560.4	956	12362.5
957	9714.49	957	9172.42	957	22123.7	957	19394.2	957	8571.02	957	6607.23	957	11494.7	957	11987.8
958	8780.54	958	8444.2	958	20892.5	958	16350.9	958	9496.54	958	7526.09	958	12091	958	11345
959	7363.46	959	7423.44	959	21300.2	959	17869.4	959	10426.7	959	8037.29	959	12417.3	959	11747.7
960	7276.58	960	6607.89	960	23527.3	960	18578.8	960	11652.1	960	9055.76	960	12244.8	960	11763.4
961	7742.17	961	7701.75	961	24007.3	961	19786.3	961	11928	961	9564.48	961	10120.9	961	11848.9
962	8902.82	962	8205.36	962	22421.9	962	16341.6	962	11168.7	962	9172.86	962	7200.55	962	8716.45
963	9083.41	963	8012.9	963	23976.8	963	17140	963	10432	963	8182.98	963	7897.85	963	9964.41
964	10701	964	8659.76	964	24254.1	964	18029.3	964	11370	964	9240.61	964	7862.29	964	9421.73
965	10307.5	965	8819.85	965	25771.1	965	19549.4	965	12688.5	965	10692.3	965	9337.14	965	11104.4
966	8889.19	966	7054.01	966	29409.4	966	23567.5	966	10066.2	966	8485.05	966	9762.76	966	9310.15
967	10117.6	967	8501.42	967	17493.7	967	9688.65	967	8689.97	967	6995.33	967	10803.6	967	10142.7
968	11385.2	968	9755.42	968	18190.5	968	13865.8	968	9898.87	968	7946.05	968	8423.59	968	6573.54
969	12644.5	969	10727.6	969	23122.5	969	16813.9	969	11114	969	8445.68	969	6067.37	969	6329.43
970	14361.7	970	11496.2	970	25816.4	970	18872.9	970	10570.2	970	7984.79	970	6039.75	970	6455.83
971	14507.6	971	12719.8	971	26176.3	971	20321	971	10969.2	971	8644.51	971	6111.91	971	6189.25
972	10897.8	972	10046	972	25464.7	972	21517.3	972	10918.6	972	8810.58	972	5777.12	972	5055.31
973	10089.9	973	8809.22	973	24054.3	973	20850.7	973	11279.2	973	8944.11	973	5352.86	973	5502.23
974	9088.05	974	9042.46	974	21356.4	974	18735.1	974	10557	974	8094.78	974	5418.49	974	5951.12
975	8866.42	975	9420.24	975	21410.1	975	15473.4	975	10952.9	975	8506.51	975	5848.52	975	5905.81
976	9042.33	976	10347.1	976	20914.5	976	15578.9	976	9855.21	976	7657.06	976	6838.9	976	6380.73
977	8568.72	977	10953.4	977	22854.3	977	18166.6	977	10985.1	977	8169.49	977	8087.55	977	7112.26
978	8759.13	978	9798.6	978	20354.1	978	16625.7	978	11783.4	978	8344.35	978	8342.39	978	6512.83
979	8403.89	979	8657.47	979	20519.5	979	17082.4	979	11954.5	979	9092.82	979	8026.69	979	6533.68
980	7681.33	980	9349.86	980	21165.9	980	17531.5	980	12017.5	980	8493.68	980	7363.79	980	6216.8
981	8664.65	981	10707	981	22327.1	981	18397.4	981	11472.2	981	8226.93	981	8372.19	981	6834.67
982	5381.65	982	8253.41	982	25719.8	982	18519.1	982	11053.5	982	8535.23	982	9667.52	982	9397.86
983	4322.62	983	4980.25	983	33106.7	983	26452	983	10983.2	983	8534.88	983	11323.3	983	10827.9
984	4195.94	984	2913.94	984	30728.4	984	30299.4	984	9924.97	984	7340.71	984	12426.5	984	11535.4
985	5320.09	985	2912.79	985	28352	985	32191	985	9859.41	985	7387.82	985	12676.2	985	10989.3
986	5980.1	986	3839.01	986	31909.1	986	27493.8	986	8793.91	986	6841.86	986	10798.9	986	9814.98
987	6003.97	987	4861.95	987	25901.9	987	28704.8	987	9427.72	987	7367.06	987	9637.4	987	8849.96
988	6264.52	988	5147.47	988	14905.6	988	18201.6	988	10176.5	988	8255.28	988	10751.2	988	10348.2
989	7004.65	989	5563.85	989	19204.8	989	20099.9	989	11357.1	989	9584.27	989	11392	989	9751.56
990	7642.98	990	8204.32	990	12125.3	990	14348.3	990	12212.3	990	9770.42	990	10391.4	990	8274.44
991	7462.65	991	8111.19	991	9908.43	991	11476	991	13108.7	991	10923.1	991	10157.7	991	8025.71
992	8602.11	992	7661.99	992	11741	992	13766.5	992	14224.8	992	12015.4	992	10921.1	992	8695.99
993	12293.5	993	8865.44	993	15337.8	993	18461.6	993	14743.6	993	12146.1	993	10633.7	993	10130.8
994	13038.9	994	9661.38	994	13287.7	994	15478.7	994	14826.1	994	11793.7	994	12104.4	994	10224
995	11766.3	995	11836.8	995	13238.1	995	15324.2	995	13851.7	995	10974.9	995	12589.9	995	11138.8
996	8064.35	996	9184.25	996	19246.2	996	21568.8	996	13371.2	996	11050.8	996	15614.8	996	11771.3
997	8298.69	997	10327.8	997	13633.1	997	16119.1	997	12708.8	997	10637	997	16018.1	997	11455
998	12029.8	998	12880	998	13463.9	998	15200.3	998	11473.7	998	10932	998	16755.4	998	11644.5
999	12466.6	999	13238.5	999	16924.9	999	16790.7	999	10473.8	999	10693.9	999	17279.5	999	10625.3
1000	11084.3	1000	11912	1000	23819.1	1000	21672.8	1000	9970.06	1000	9859.77	1000	16141.3	1000	10600.4
1001	10298.9	1001	9421.95	1001	20850.8	1001	20258.9	1001	9850.32	1001	9499.14	1001	16880.3	1001	12667.1
1002	10205.2	1002	8965.5	1002	17337.4	1002	18229.6	1002	9516.76	1002	8991.8	1002	16223.3	1002	15119.3
1003	8482.36	1003	7758.23	1003	24124.5	1003	23433.2	1003	9512.7	1003	8571.7	1003	16503.8	1003	13960.3
1004	8793.16	1004	9337.1	1004	29021.4	1004	26825.8	1004	9846.51	1004	9047.13	1004	13801.6	1004	11174.6
1005	7164.88	1005	8086.72	1005	31852.9	1005	26536.8	1005	9583.94	1005	9280.88	1005	12145.2	1005	9608.3
1006	6666.43	1006	8059.36	1006	32470.7	1006	24902.1	1006	8187.03	1006	7871.15	1006	14973.1	1006	11769.1
1007	6652.99	1007	7203.86	1007	32930.2	1007	25530.3	1007	6981.71	1007	7138.38	1007	15362.9	1007	12494.5
1008	7455.17	1008	8526.64	1008	34555.5	1008	27616.2	1008	6095.05	1008	5768.37	1008	15974.3	1008	10485.6
1009	8013.55	1009	8744.22	1009	34977.4	1009	30649.8	1009	5887.82	1009	5223.7	1009	15248.3	1009	9985.29
1010	7443.68	1010	8980.5	1010	32855.9	1010	31829.1	1010	6006.46	1010	4993.66	1010	15015.1	1010	9565.8
1011	9728.12	1011	10425.3	1011	37756.7	1011	30311.2	1011	6018.17	1011	4745.1	1011	12604.3	1011	8529.7
1012	11393.9	1012	10100.7	1012	34768.5	1012	30949	1012	6549.19	1012	4505.59	1012	12107.6	1012	7892.24
1013	12077.7	1013	10768.2	1013	31429.8	1013	30436.5	1013	6783.58	1013	5162.65	1013	10871.8	1013	8482.99
1014	12341.2	1014	9630.98	1014	27547.7	1014	27677.6	1014	7717.27	1014	6176.83	1014	9390.46	1014	8075.1
1015	15379.3	1015	11724.7	1015	24657.9	1015	25252.3	1015	11269	1015	9467.77	1015	9489.4	1015	7989.83
1016	21358.6	1016	16568.3	1016	24670.8	1016	24071.9	1016	14671.7	1016	11634	1016	10721.7	1016	7352.52
1017	24410.9	1017	21578.6	1017	23987.5	1017	23065.1	1017	13711.4	1017	11735.7	1017	11828.5	1017	9041.13
1018	24035.8	1018	23859.5	1018	22105.5	1018	21916.6	1018	17549.9	1018	14406.4	1018	13757.8	1018	11288.3
1019	24100.6	1019	24161.7	1019	23641.9	1019	26314.6	1019	19485.6	1019	15714.8	1019	17093.7	1019	13578.7
1020	24822.9	1020	25326	1020	36623	1020	36793.9	1020	17018.8	1020	13920.6	1020	19463.2	1020	16110
1021	24533.6	1021	25646.1	1021	38972	1021	35252.7	1021	19769	1021	15685.3	1021	20133	1021	17597.8
1022	22836	1022	24143.3	1022	39036.8	1022	34298.5	1022	20739.3	1022	15492	1022	19618.5	1022	21251.6
1023	21312	1023	22246.7	1023	38311.1	1023	31996.8	1023	18778.9	1023	12974.5	1023	18653.8	1023	19128.6
1024	20109.4	1024	21118.8	1024	36611.8	1024	27888.1	1024	19612.1	1024	13840.5	1024	12779.2	1024	13345.1
1025	19688.3	1025	19679.7	1025	32846.7	1025	23604.7	1025	21451.2	1025	16467.8	1025	10695.9	1025	10452
1026	20212.4	1026	20426	1026	28256.9	1026	19726.4	1026	21730.6	1026	16997	1026	11381.7	1026	11187
1027	20353.8	1027	20528.4	1027	24222.8	1027	15711.4	1027	19698.9	1027	14857.8	1027	12850	1027	12203.4
1028	18429.5	1028	18755.4	1028	21958	1028	14953.4	1028	17905.8	1028	14881.8	1028	12368.9	1028	11203.6
1029	15505.5	1029	16982.4	1029	21362.4	1029	15890.5	1029	19622.2	1029	16176.6	1029	13698.3	1029	12627.3
1030	13092.4	1030	15999.6	1030	20683.4	1030	14597.2	1030	20073.3	1030	16343.7	1030	14769.1	1030	11223.8
1031	13475.9	1031	15506.3	1031	19276.8	1031	14504.6	1031	19603.2	1031	16368.2	1031	14016.8	1031	10680.7
1032	11718.6	1032	14995.8	1032	14851	1032	11669.8	1032	19665	1032	16395.2	1032	12920.4	1032	11547.7
1033	12355.6	1033	15389.3	1033	15571.1	1033	11701.8	1033	19578.3	1033	17726.3	1033	13110	1033	10429.7
1034	14400.7	1034	16407.1	1034	12778	1034	9712.99	1034	17994.5	1034	17480	1034	13546.1	1034	11512.3
1035	17337.3	1035	17933.9	1035	14013.3	1035	10243.6	1035	15315	1035	13678.5	1035	13999	1035	12977
1036	20141.9	1036	20131.5	1036	10230.9	1036	6430.59	1036	13028	1036	10650.9	1036	13815.6	1036	12588.5
1037	20467.9	1037	21039.2	1037	4247.72	1037	3540.85	1037	15166.3	1037	12782.6	1037	13383.9	1037	12063.4
1038	19727.5	1038	19221	1038	4188.29	1038	3303.93	1038	11742.6	1038	8829.44	1038	15179.5	1038	14437.1
1039	19701.1	1039	20736.6	1039	3447.73	1039	3509.13	1039	14849.6	1039	12167.2	1039	15711.4	1039	15976.8
1040	20843.1	1040	21618.1	1040	3374.37	1040	4002.39	1040	12950.2	1040	9622.94	1040	16528.2	1040	16735.9
1041	22020.8	1041	23289	1041	4206.07	1041	6314.94	1041	11868.3	1041	8836.16	1041	17338.2	1041	17112.8
1042	24171.1	1042	25482.9	1042	7594.82	1042	8320.91	1042	11937.8	1042	9428.27	1042	17118.7	1042	16586.6
1043	24952.6	1043	25718.2	1043	8827.75	1043	8309.68	1043	11355.1	1043	9788.35	1043	17081.7	1043	15747.8
1044	24495.7	1044	24571	1044	8456.91	1044	8581.08	1044	10509.8	1044	9319.95	1044	17078.1	1044	15289.2
1045	23728.9	1045	23851.2	1045	7953.99	1045	8561.48	1045	8890.45	1045	7322.46	1045	15181.2	1045	12427.6
1046	23219.5	1046	21783.3	1046	9202.44	1046	9398.38	1046	8653.66	1046	6363.95	1046	13109.2	1046	10562.2
1047	22965.5	1047	19942.8	1047	8982.92	1047	9884.03	1047	9271.69	1047	7702.69	1047	15996.1	1047	13848.8
1048	22962.8	1048	18858.4	1048	11883.9	1048	12846	1048	8159.43	1048	5888.52	1048	14240.5	1048	12035.5
1049	22672.6	1049	16345.4	1049	17379.1	1049	18674.2	1049	8627.96	1049	6484.69	1049	14223.8	1049	12675.3
1050	25764	1050	22505.5	1050	18880.5	1050	20331.7	1050	8249.63	1050	6712.92	1050	13416.3	1050	12589.8
1051	22648.5	1051	18228.7	1051	18902.7	1051	17635.8	1051	8813.04	1051	7750.09	1051	12756.3	1051	11672.6
1052	21466.9	1052	19173.7	1052	15180.4	1052	13531.8	1052	8999.64	1052	7318.45	1052	12723.9	1052	11839.9
1053	21506.9	1053	20495.6	1053	13278.4	1053	12191.4	1053	8682.36	1053	7272.34	1053	10416	1053	7941.65
1054	21725.6	1054	22791.4	1054	12226.3	1054	10257	1054	8271.17	1054	7022.53	1054	10639	1054	8721.57
1055	19635.5	1055	21399.3	1055	10706.3	1055	10122.3	1055	9221.93	1055	9018.52	1055	10360.1	1055	9728.93
1056	18627.4	1056	20019.8	1056	10858.1	1056	11246.2	1056	8516.7	1056	7237.08	1056	11741	1056	10005.5
1057	20224.4	1057	20267.8	1057	11157.2	1057	9249.72	1057	7914.18	1057	5994.18	1057	10987.7	1057	10844.8
1058	18369.1	1058	18255.9	1058	11491	1058	8767.94	1058	7390.31	1058	5570.01	1058	11992.3	1058	10615.6
1059	18100.4	1059	17254.8	1059	11473.4	1059	9294.92	1059	7087.49	1059	5498.58	1059	13596.5	1059	11855
1060	19763.8	1060	17147.2	1060	11276.8	1060	9355.08	1060	7072.03	1060	5538.68	1060	12769.7	1060	11403.8
1061	16466	1061	15512.3	1061	10542.1	1061	8349.59	1061	9572.4	1061	7679.6	1061	9822.37	1061	10063.1
1062	14534.3	1062	13158.4	1062	10719.9	1062	8271.07	1062	10990.1	1062	9070.35	1062	8312.08	1062	7638.82
1063	16433.2	1063	13476.9	1063	10781.1	1063	9147.51	1063	10419	1063	8798.06	1063	11485.4	1063	10231.4
1064	15384.8	1064	12906.7	1064	11485	1064	10952.9	1064	8368.25	1064	7584.02	1064	12088.7	1064	8686.39
1065	15297.1	1065	13213	1065	12817.6	1065	13144.1	1065	7174.73	1065	6437.52	1065	10953.3	1065	7038.57
1066	15416.7	1066	13347.7	1066	12132.4	1066	10704.9	1066	5316.23	1066	4077.24	1066	10024.1	1066	7284.57
1067	14823	1067	13365.8	1067	14070	1067	10285	1067	4852.81	1067	3340.51	1067	9497.63	1067	8434.53
1068	12838.2	1068	12565.7	1068	13724.3	1068	10032.3	1068	4783.34	1068	3162	1068	9752.82	1068	10497.7
1069	12586.1	1069	15917.2	1069	12139.8	1069	8343.29	1069	4511.73	1069	3342.98	1069	11262.7	1069	11223.2
1070	11749.3	1070	16805.1	1070	11861.5	1070	8812.16	1070	5460.44	1070	4721.37	1070	12416.1	1070	13024.4
1071	11418.8	1071	16968.9	1071	12287.1	1071	9226.51	1071	7507.4	1071	7143.87	1071	12503.1	1071	12067.4
1072	9971.25	1072	14128.2	1072	13671.1	1072	11286.2	1072	8021.02	1072	8351.07	1072	12550.7	1072	10488.6
1073	8729.41	1073	11362.9	1073	16915.2	1073	12330.9	1073	7729.85	1073	8323.19	1073	11385.5	1073	9581.63
1074	10322.2	1074	11158.9	1074	19070.6	1074	14734.1	1074	7108.65	1074	8022.72	1074	11885.5	1074	11352.3
1075	12209.1	1075	12380.9	1075	17280.4	1075	12855.3	1075	8596.09	1075	9357.25	1075	10985	1075	10758.2
1076	14620.1	1076	14045.8	1076	15954.2	1076	13603.5	1076	7106.75	1076	8000.25	1076	10506.8	1076	9829.03
1077	14264.3	1077	13159.1	1077	19128.1	1077	15741.1	1077	6396.54	1077	6920.61	1077	10706	1077	8779.62
1078	15014	1078	13935.9	1078	17089.8	1078	15006	1078	6161.98	1078	6194.55	1078	9965.35	1078	8405.16
1079	16117.9	1079	15184.4	1079	15058.7	1079	10361.5	1079	6441.98	1079	6349.3	1079	9345.34	1079	8413.37
1080	17126	1080	16643.4	1080	15421.8	1080	10053.5	1080	6465.06	1080	6467.74	1080	9896.61	1080	8556.25
1081	19965.3	1081	20572.8	1081	13394.6	1081	10717.9	1081	5821.86	1081	6063.9	1081	9673.88	1081	9159.5
1082	21691.4	1082	21108.4	1082	10896.4	1082	9840.84	1082	5898.44	1082	6338.28	1082	8929.48	1082	9458.17
1083	21684.2	1083	21006.4	1083	10386.5	1083	9928.42	1083	4883.86	1083	5248.58	1083	8431.18	1083	8844
1084	21264.2	1084	18214.3	1084	11633.5	1084	9775.58	1084	3679.52	1084	3537.49	1084	8264.12	1084	7685.82
1085	19899.4	1085	17144.7	1085	12979.6	1085	12349.4	1085	4754.7	1085	4928.28	1085	9001.66	1085	8582.82
1086	18147.6	1086	17004.5	1086	11780.4	1086	10118.7	1086	4796.95	1086	4556.03	1086	9699.62	1086	9650.97
1087	15368.5	1087	14467.4	1087	14707.1	1087	12073.9	1087	3079.88	1087	2570.23	1087	10326.2	1087	9429.97
1088	16271.8	1088	13325.8	1088	13824.5	1088	11294.6	1088	3733.84	1088	3723.22	1088	10759.3	1088	8932.54
1089	14383	1089	12244.8	1089	15515.6	1089	14967.6	1089	3827.77	1089	2840.05	1089	11478.9	1089	9340.2
1090	15008.7	1090	12266.9	1090	13953.3	1090	11423.9	1090	4439.32	1090	3228.32	1090	12092.6	1090	11405.7
1091	13876.2	1091	11511.8	1091	12730.3	1091	12857.6	1091	5018.99	1091	3381.87	1091	15740.2	1091	14682.9
1092	16554.4	1092	12279.1	1092	9300.09	1092	9667.88	1092	5110.29	1092	3308.73	1092	16369.1	1092	13565.5
1093	16054.2	1093	11381.2	1093	7405.67	1093	7443.4	1093	6066.54	1093	4478.09	1093	16542.6	1093	14507.1
1094	16541	1094	12163.8	1094	8331.47	1094	8183.9	1094	4395.68	1094	3287.17	1094	16870.6	1094	14391.3
1095	16005.9	1095	11458.4	1095	7533.15	1095	6804.88	1095	4492.99	1095	3380.7	1095	18080.5	1095	16065.3
1096	15259.4	1096	10991.4	1096	7522.16	1096	7914.71	1096	4456.12	1096	3438.87	1096	18376.8	1096	15922.7
1097	13864.6	1097	10458.2	1097	8317.51	1097	7365.22	1097	3549.61	1097	2803.17	1097	17787.2	1097	16641.7
1098	11322.2	1098	8668.54	1098	9960.39	1098	8928.48	1098	1891.03	1098	1345.43	1098	15726.6	1098	14545.7
1099	9628.29	1099	7257.93	1099	10360.6	1099	8887.37	1099	1615.58	1099	1041.13	1099	14428.6	1099	13305.7
1100	9189.86	1100	8050.49	1100	11102.9	1100	8617.07	1100	1447.83	1100	901.881	1100	14170.1	1100	12273.1
1101	9205.94	1101	8631.45	1101	10011.6	1101	8595.02	1101	1000.22	1101	548.44	1101	13969	1101	14021.6
1102	9380.88	1102	10843.9	1102	10533.9	1102	9736.86	1102	649.025	1102	485.355	1102	11187.2	1102	12058.1
1103	9508.69	1103	9740.7	1103	9607.72	1103	8153.29	1103	950.714	1103	674.841	1103	7964.96	1103	7810.37
1104	8521.12	1104	9131.53	1104	12989.7	1104	13267.9	1104	1647.96	1104	1252.44	1104	7738.01	1104	8366.29
1105	11070.1	1105	13133.7	1105	15123	1105	14484.6	1105	5154.07	1105	4436.72	1105	8617.99	1105	9259.67
1106	13902.3	1106	13755.8	1106	17640.9	1106	18242.5	1106	6304.08	1106	5878.08	1106	11437.3	1106	13034.2
1107	14609.6	1107	12032.3	1107	15773.9	1107	14965.4	1107	6055.64	1107	5273.95	1107	12359.2	1107	15778.2
1108	11532.7	1108	9744.9	1108	19170.3	1108	17450.7	1108	5955.48	1108	5239.44	1108	10779.3	1108	13272.1
1109	11023.6	1109	10162.1	1109	20231.9	1109	18725.5	1109	6225.23	1109	5370.57	1109	9126.47	1109	10133.2
1110	10723.6	1110	10022.6	1110	20986.2	1110	21312.7	1110	6932.33	1110	5552.75	1110	9825.73	1110	10087
1111	9540.81	1111	9071.34	1111	18647.6	1111	18923.5	1111	7388.38	1111	5603.23	1111	11713.8	1111	11666.5
1112	9334.14	1112	8619.28	1112	15050.4	1112	14384.6	1112	8413.26	1112	6044.58	1112	11649.6	1112	10772.1
1113	9342.74	1113	7725.7	1113	13338.3	1113	11925	1113	9379.01	1113	6841.15	1113	12674.7	1113	10396.3
1114	9010.46	1114	7124.29	1114	12456.6	1114	10672	1114	10086.3	1114	7637.35	1114	15258.2	1114	11775.4
1115	9379.59	1115	7521.14	1115	11737.2	1115	10714.2	1115	10915.5	1115	7607.91	1115	17759	1115	15702.8
1116	8893.58	1116	6996.34	1116	11275.1	1116	10328.9	1116	10698.5	1116	7857.19	1116	15523	1116	15391.3
1117	8965.88	1117	6252.55	1117	11282.2	1117	11069.1	1117	10436.4	1117	8040.27	1117	11684.7	1117	10359
1118	6201.86	1118	4468.97	1118	12055.3	1118	10682.6	1118	10217.2	1118	7825.63	1118	10676.4	1118	10200.4
1119	6986.44	1119	5642.27	1119	11225.8	1119	10613.7	1119	9218.85	1119	7263.62	1119	11107.5	1119	10196.9
1120	7452.59	1120	4322.82	1120	12571.5	1120	10590.5	1120	9040.1	1120	7417.79	1120	10992.1	1120	10162.3
1121	7306.24	1121	5466.96	1121	12743.8	1121	10266.1	1121	9366.76	1121	7652.73	1121	10914.9	1121	10979.3
1122	5816.67	1122	5004.9	1122	12642.8	1122	11018.2	1122	10268.1	1122	7831.91	1122	12116.9	1122	11933.3
1123	6644	1123	6297.92	1123	12660.3	1123	11243.6	1123	10933.7	1123	8508.71	1123	12325	1123	8909.38
1124	6948.44	1124	6961.49	1124	14371.6	1124	13965.4	1124	11365.6	1124	8804.34	1124	11055.5	1124	8465.59
1125	7260.1	1125	7294.98	1125	16286.8	1125	15973.6	1125	11663.6	1125	9552.04	1125	9592.26	1125	8707.57
1126	7972.28	1126	7451.95	1126	19027.1	1126	18263.9	1126	11435.9	1126	9433.16	1126	10002.3	1126	11961.6
1127	7987.29	1127	7432.72	1127	19942.7	1127	18878.9	1127	11358.3	1127	8498.33	1127	10109.3	1127	11601.2
1128	7500.94	1128	7343.89	1128	16984.2	1128	16210	1128	10206	1128	7841.62	1128	9693.25	1128	11274.7
1129	7044.8	1129	6708.59	1129	18865	1129	19577.9	1129	11248	1129	8676.9	1129	10960.3	1129	11931.1
1130	6540.85	1130	5790.74	1130	20625.7	1130	23021.5	1130	10960.6	1130	8609.95	1130	12546.4	1130	13535.9
1131	6024.36	1131	5326.79	1131	20498.6	1131	21802.2	1131	8152.32	1131	6043.15	1131	12168.8	1131	13021
1132	5759.14	1132	4924.06	1132	19312.2	1132	18654.3	1132	9175.1	1132	6914.05	1132	11022.6	1132	10751.8
1133	6169.9	1133	4968.77	1133	14486.7	1133	16319.2	1133	8770.85	1133	6788.22	1133	10697.6	1133	10805.3
1134	6761.74	1134	5381.59	1134	20315.2	1134	21519.6	1134	11853.7	1134	8975.83	1134	9972.7	1134	9992.38
1135	7281.45	1135	7010.18	1135	19217.1	1135	18040.4	1135	11060.3	1135	8034.63	1135	11299.7	1135	13348.6
1136	6338.22	1136	5282.86	1136	19429.8	1136	16069.4	1136	10873.6	1136	7953.25	1136	9866.25	1136	8807.26
1137	6509.49	1137	5048.32	1137	18996.2	1137	13560	1137	10991.9	1137	8327.78	1137	10978.8	1137	10859.8
1138	6241.54	1138	5205.96	1138	15407.9	1138	10618.5	1138	10627.8	1138	8691.5	1138	9861.97	1138	8760.76
1139	6922.87	1139	6902.27	1139	19434.6	1139	15048.5	1139	10484.2	1139	8584.99	1139	9847.94	1139	11049
1140	7374.75	1140	8234.16	1140	18844.2	1140	16886.7	1140	10645.7	1140	8720.81	1140	7093.6	1140	7895.98
1141	7678.11	1141	9285.79	1141	19434.8	1141	17859.1	1141	10257.8	1141	8798.93	1141	8666.87	1141	8629.24
1142	7312.09	1142	7435.46	1142	19103.9	1142	18091.3	1142	9491.13	1142	8112.37	1142	7005.97	1142	7776.9
1143	6950.47	1143	5259.65	1143	20737.9	1143	19815	1143	9540.13	1143	7760.88	1143	7429.65	1143	6399.34
1144	7659.92	1144	7599.27	1144	22090.4	1144	22953.2	1144	9956.41	1144	7786.2	1144	7229.24	1144	7052.78
1145	6909.84	1145	5421.83	1145	21959.8	1145	24154.7	1145	10011.5	1145	7797.12	1145	6521.92	1145	6849.16
1146	4820.5	1146	4180.33	1146	20822.4	1146	21477.6	1146	9745.42	1146	8132.35	1146	6639.89	1146	6249.64
1147	6032.59	1147	5103.31	1147	20953.4	1147	20805.8	1147	9655.2	1147	8411.22	1147	6245	1147	7030.14
1148	5540.72	1148	6085.45	1148	20364	1148	19998.6	1148	9515.4	1148	8387.59	1148	7017.6	1148	7036.99
1149	6138.24	1149	6481.78	1149	21005.1	1149	20686.3	1149	9488.56	1149	7330.44	1149	7736.6	1149	7545.05
1150	7162.91	1150	7080.77	1150	21249.7	1150	21207.8	1150	8938.08	1150	7523.72	1150	8968.51	1150	6431.09
1151	7716.81	1151	6428.67	1151	20485.8	1151	17837.8	1151	9054	1151	7659.9	1151	7987.98	1151	8187.65
1152	8671.55	1152	9040.48	1152	19707.2	1152	16442.8	1152	8850.1	1152	7510.47	1152	9889.55	1152	9148.7
1153	7885.2	1153	6839.76	1153	18132.7	1153	15063.8	1153	8671.97	1153	7424.97	1153	11867.6	1153	9829.55
1154	7457.46	1154	6405.62	1154	17297	1154	14302.2	1154	8845.37	1154	7306.87	1154	17988.3	1154	15525.6
1155	8264.18	1155	8853.34	1155	14640.1	1155	13082.5	1155	8504.15	1155	7507.91	1155	30285.6	1155	25484.4
1156	9160.3	1156	9810.49	1156	17014.1	1156	14249.8	1156	8809.53	1156	7658.11	1156	45912.3	1156	42621.4
1157	10885.5	1157	11360	1157	14532.4	1157	13191.2	1157	8693.48	1157	7573.65	1157	53785.5	1157	56615.6
1158	8938.54	1158	9291.68	1158	14176.6	1158	11901.1	1158	8552.45	1158	7406.33	1158	50606.5	1158	54508.4
1159	11369.5	1159	10940	1159	13790.5	1159	11758.9	1159	8826.17	1159	7468.14	1159	51130.6	1159	53226.8
1160	11694.2	1160	10516.4	1160	14182.1	1160	12539.3	1160	8661.55	1160	7268.16	1160	53560.2	1160	49198.9
1161	9978.69	1161	7164.99	1161	13874.3	1161	11671.2	1161	9033.49	1161	7354.6	1161	53726.7	1161	46310.4
1162	7337.48	1162	4628.78	1162	14241.2	1162	12561	1162	8792.8	1162	7274.05	1162	45606.4	1162	40082.2
1163	6171.66	1163	5013.03	1163	15817.8	1163	13304	1163	8592.35	1163	7046.5	1163	39017.1	1163	35507.4
1164	6825.68	1164	4230.44	1164	18293.7	1164	14783.7	1164	8163.15	1164	7219.58	1164	32938.1	1164	28352.6
1165	7698.99	1165	4791.43	1165	17876.7	1165	15242.3	1165	8017.11	1165	7111.43	1165	31582.2	1165	26501.7
1166	7898.97	1166	5097.94	1166	19026.8	1166	17020.9	1166	7857.08	1166	6818.65	1166	25254.5	1166	21558
1167	7550.18	1167	5296.12	1167	18900.7	1167	14445.5	1167	7632.39	1167	6870.29	1167	18348.8	1167	16692.1
1168	8444.52	1168	6177.26	1168	13850.5	1168	9428.66	1168	7831.29	1168	7039.21	1168	27014.4	1168	22595.8
1169	8499.07	1169	6063.42	1169	14095.4	1169	9860.58	1169	8104.5	1169	6912.89	1169	35640.4	1169	30633.2
1170	9739.68	1170	8554.07	1170	13768.1	1170	10598.7	1170	7967.81	1170	6463.02	1170	30500.3	1170	27340.5
1171	10820.1	1171	10559.9	1171	12817.1	1171	10988.4	1171	7786.15	1171	6636.95	1171	29917.5	1171	27873
1172	9948.41	1172	10222.9	1172	11860.9	1172	10370.5	1172	8008.52	1172	6562.49	1172	43078.2	1172	43838.2
1173	10094.4	1173	10934.4	1173	11446.7	1173	9968.5	1173	7482.87	1173	6876.16	1173	42026.6	1173	43254
1174	8760.6	1174	10318.4	1174	10420.8	1174	8870.82	1174	8101.26	1174	6739.33	1174	44693.2	1174	45332.2
1175	7968.61	1175	8581.72	1175	9241.31	1175	7662.81	1175	7522.95	1175	6403.29	1175	41587.2	1175	39935.1
1176	7132.56	1176	8779.45	1176	8937.11	1176	7914.65	1176	7539.81	1176	6028.6	1176	41348.6	1176	40875.8
1177	7055.1	1177	9091.4	1177	9169.1	1177	8055.22	1177	7515.52	1177	5450.92	1177	40880.6	1177	39335.3
1178	7404.81	1178	8547.65	1178	9313.59	1178	7677.19	1178	7076.81	1178	5187.28	1178	43684.2	1178	38524.6
1179	8966.8	1179	10016.2	1179	9509.48	1179	7059.18	1179	6532.96	1179	4423.61	1179	44677.1	1179	38305.4
1180	8758.24	1180	8988.51	1180	9396.18	1180	6462.78	1180	6581.31	1180	4512.28	1180	43019.7	1180	38541.8
1181	8105.32	1181	6989.01	1181	7753.78	1181	4816.37	1181	5985.05	1181	5392.83	1181	43203.7	1181	41410.3
1182	9027.06	1182	8618.36	1182	6266.13	1182	3961.79	1182	6441.25	1182	5703.44	1182	39155.1	1182	38354.7
1183	9262.75	1183	8818.75	1183	6173.34	1183	4464.06	1183	6781.91	1183	6083.32	1183	41625.1	1183	40369.5
1184	10047.3	1184	8311.36	1184	5847.57	1184	5532.18	1184	6856.4	1184	5590.29	1184	47438.1	1184	45964.9
1185	11040.7	1185	9200.15	1185	7435.16	1185	6224.32	1185	6694.79	1185	5355.29	1185	44555.1	1185	42548.8
1186	11507.8	1186	8704.28	1186	8871.49	1186	7547.89	1186	6624.08	1186	5662.23	1186	43062.3	1186	40728
1187	10774.9	1187	8059.38	1187	10409.3	1187	9452.49	1187	5964.14	1187	5292.76	1187	41940.5	1187	40414.8
1188	10840.8	1188	8471.31	1188	10756	1188	9701.81	1188	4775.58	1188	4069.46	1188	39545.9	1188	39446.9
1189	11144.3	1189	9129.52	1189	12144.5	1189	11349.4	1189	4679.24	1189	3438.14	1189	39221.2	1189	40035.1
1190	9902.32	1190	9368.95	1190	13520.8	1190	11290.6	1190	5252.02	1190	3890.01	1190	37088.6	1190	37146.3
1191	8537.33	1191	8318.3	1191	11833.8	1191	11045.1	1191	5222.86	1191	3556.36	1191	37594.6	1191	36442.1
1192	7503.42	1192	6163.45	1192	10862.6	1192	9422.32	1192	5047.88	1192	3965.89	1192	32553	1192	31315.5
1193	7343.84	1193	7450.74	1193	10467.2	1193	9513.05	1193	6149.03	1193	4543.28	1193	26451.5	1193	24555.9
1194	8317.31	1194	6919.47	1194	10057.2	1194	10201.4	1194	6653.18	1194	5118.9	1194	20146.6	1194	19265.7
1195	6767.26	1195	6753.88	1195	9861.05	1195	9843.88	1195	6368.7	1195	5315.81	1195	21127	1195	21536.4
1196	6546.61	1196	7161.41	1196	9274.61	1196	8709.54	1196	5905.29	1196	4330.33	1196	17548	1196	17078.8
1197	5853.81	1197	6131.74	1197	8358.6	1197	8132.58	1197	6302.04	1197	4552.62	1197	16590.7	1197	15518.4
1198	7555.78	1198	9909.86	1198	7797.13	1198	7660.15	1198	6001.62	1198	4642.53	1198	13897.6	1198	13242.4
1199	6306.83	1199	8797.18	1199	10871.5	1199	11968.6	1199	5686.31	1199	4413.19	1199	11721.4	1199	12295.2
1200	5805.11	1200	7190.32	1200	13125.5	1200	13305.9	1200	8478.37	1200	7700.37	1200	10933.4	1200	11294.3
1201	9348.16	1201	9168.86	1201	13332.7	1201	12207.1	1201	12550.9	1201	11071.5	1201	10898.7	1201	10714.6
1202	8719.35	1202	8278.02	1202	14072.8	1202	11848.7	1202	13194.1	1202	9849.47	1202	12682.7	1202	10712.5
1203	8729.75	1203	8422.23	1203	15828.4	1203	12690	1203	10897.6	1203	7892.18	1203	12380.9	1203	10728.2
1204	9283.9	1204	9501.38	1204	16013.6	1204	13996	1204	9863.71	1204	7239.53	1204	10995.6	1204	11378
1205	9154.04	1205	9889.15	1205	16603.2	1205	15954.2	1205	11241.5	1205	9204.1	1205	11507	1205	11506.5
1206	8700.65	1206	7748.31	1206	15235.1	1206	16052	1206	10460.2	1206	7963.37	1206	12365	1206	12413.9
1207	7961.12	1207	7631.72	1207	12865	1207	14253.1	1207	11497.3	1207	9790.55	1207	12097.2	1207	10698.8
1208	8275.34	1208	7690.77	1208	16933.1	1208	18457.5	1208	9935.81	1208	8467.88	1208	11788.7	1208	10585.8
1209	8531.56	1209	7137.39	1209	21509.1	1209	21146.2	1209	7452.19	1209	7265.92	1209	11166.7	1209	10012.5
1210	11397	1210	8997.9	1210	17975.9	1210	19397.7	1210	6891.53	1210	6660.42	1210	10050.3	1210	8155.94
1211	15314.2	1211	13117.5	1211	17921.5	1211	18063.4	1211	8374.96	1211	7263.31	1211	11054.8	1211	8881.28
1212	15670.6	1212	12474.4	1212	21266.2	1212	20141.8	1212	10454.6	1212	9086.43	1212	8971.07	1212	6037.27
1213	16016.1	1213	14692.6	1213	21427.3	1213	18245.7	1213	9997.77	1213	8906.88	1213	6969	1213	5596.64
1214	12414.6	1214	11124.9	1214	18857.1	1214	15447.9	1214	12050.1	1214	10640.7	1214	8877.62	1214	7520.15
1215	11210	1215	11397.8	1215	17814.5	1215	14662.8	1215	14693	1215	12742.7	1215	9775.47	1215	8801.31
1216	12244	1216	13774.2	1216	17689.4	1216	13165.8	1216	15741.7	1216	11997.9	1216	11087.8	1216	9442.7
1217	16378.8	1217	18886.1	1217	15997.7	1217	11318	1217	15226.4	1217	12330.4	1217	12117.9	1217	10552
1218	17669.1	1218	17263.2	1218	19248.9	1218	14131.6	1218	14553.8	1218	12238.5	1218	12015.6	1218	11629.8
1219	19511.5	1219	17269.4	1219	17122.8	1219	12461.8	1219	13382.9	1219	11709.4	1219	13604.5	1219	12544.3
1220	18129.8	1220	13186	1220	15541.8	1220	11098.8	1220	11183	1220	8084.44	1220	11341.7	1220	11775.6
1221	14968.6	1221	12417.8	1221	14953.6	1221	10942.3	1221	10454	1221	8328.88	1221	11109.5	1221	10535.1
1222	14239.6	1222	10133.7	1222	14566	1222	10321.6	1222	8597.96	1222	5907.76	1222	11186.9	1222	11715.8
1223	13086.9	1223	9079.89	1223	13551	1223	10235	1223	5954.49	1223	4945.02	1223	11108.7	1223	12726.4
1224	16070.5	1224	12179	1224	12601	1224	9697.71	1224	7808.7	1224	6904.52	1224	11095.7	1224	10468.7
1225	13112.4	1225	10435.9	1225	13207.7	1225	10582.7	1225	6461.42	1225	5958.27	1225	11533.3	1225	9383.31
1226	12555.1	1226	9709.76	1226	13927.2	1226	12248.4	1226	7777.94	1226	7281.06	1226	11383.8	1226	7568.42
1227	12960.2	1227	10216.3	1227	14012.3	1227	11052.6	1227	10037.7	1227	9519.54	1227	9279.27	1227	6076.38
1228	12469.1	1228	10511.2	1228	15363.9	1228	12477.7	1228	11624.8	1228	9603.03	1228	8696.05	1228	6995.42
1229	12270	1229	10738.7	1229	17745.6	1229	13576.3	1229	10475	1229	9309.42	1229	8464.23	1229	8901.74
1230	14678.8	1230	13233.1	1230	23903.4	1230	19285	1230	12014.4	1230	8329	1230	8823.45	1230	8371.17
1231	13081.9	1231	12519.8	1231	22584.9	1231	17899.2	1231	10181.3	1231	7477.21	1231	9527.44	1231	8546.46
1232	14870	1232	15224.4	1232	19889.8	1232	15133.6	1232	6951.62	1232	4125.44	1232	8505.3	1232	7785.87
1233	15376.3	1233	16191.8	1233	17375.8	1233	14288.6	1233	5770.13	1233	3218.17	1233	9500.38	1233	8698.36
1234	16546.7	1234	16466.8	1234	17344.7	1234	13460.3	1234	4757.94	1234	1971.19	1234	9623.11	1234	7378.38
1235	17753.9	1235	19439.4	1235	16659.6	1235	13033.7	1235	5126.39	1235	2812.51	1235	10887.6	1235	8430.2
1236	17999.8	1236	19287.2	1236	14548.4	1236	11466.7	1236	3956.4	1236	2052.66	1236	11510.5	1236	10600.4
1237	17010.3	1237	17621.8	1237	14149.8	1237	11792.6	1237	4178.21	1237	2414.05	1237	10500	1237	9438.66
1238	14472.1	1238	12963.7	1238	12081	1238	9336.32	1238	6843.81	1238	3965.75	1238	11414	1238	9597.2
1239	14032	1239	13805.6	1239	9737.08	1239	7233.16	1239	10270.3	1239	6721.97	1239	10667.8	1239	8344.23
1240	15790.5	1240	15117.4	1240	9310.21	1240	6594.83	1240	12589.9	1240	8525.19	1240	10359.9	1240	9033.53
1241	14774.7	1241	13667.6	1241	7401.26	1241	4572.19	1241	13759.1	1241	10890	1241	8439.29	1241	6754.32
1242	14210.5	1242	11312.1	1242	7232.61	1242	4670.62	1242	14072	1242	10965.1	1242	9147.91	1242	7434.73
1243	12726	1243	9194.38	1243	6865.19	1243	4296.23	1243	12201.3	1243	10239.6	1243	11018.6	1243	7094.93
1244	11655.6	1244	9128.39	1244	6148.53	1244	4355.68	1244	11186.8	1244	8621.43	1244	9714.13	1244	6934.71
1245	10742.9	1245	8917.73	1245	7619.58	1245	5765.4	1245	12647	1245	10717.9	1245	10143.2	1245	7139.6
1246	9818.56	1246	7508.72	1246	7834.19	1246	6640.33	1246	13928	1246	11038.3	1246	10943	1246	7916.63
1247	11039.7	1247	8882.34	1247	8372.27	1247	7835.7	1247	13377.7	1247	10959.5	1247	12462.9	1247	10877
1248	11800.7	1248	10099.5	1248	7905.19	1248	7423.35	1248	12249.8	1248	9913.8	1248	11687.2	1248	9079.6
1249	12192.8	1249	10928.9	1249	8971.35	1249	8282.28	1249	10112.2	1249	7832.61	1249	14374.5	1249	11632.5
1250	10205.5	1250	7626.01	1250	9109.89	1250	8737.15	1250	6413.9	1250	4244.7	1250	15722.6	1250	13153.6
1251	11730.6	1251	9481.69	1251	8925.99	1251	9175.83	1251	4970.15	1251	2709.88	1251	16894.6	1251	14475.9
1252	15457.2	1252	14352.6	1252	8514.16	1252	10239.8	1252	4599.57	1252	2697.86	1252	16376.4	1252	14401.5
1253	16964.9	1253	16198.9	1253	10619.7	1253	11679.6	1253	4422.29	1253	1496.52	1253	17890.8	1253	16688.7
1254	18223	1254	16114.2	1254	12865.3	1254	11802.1	1254	5365.62	1254	1430.99	1254	16307.3	1254	16527
1255	18140.9	1255	17192.9	1255	13624.2	1255	11478.5	1255	7657.03	1255	3099.89	1255	15830.4	1255	15351.8
1256	18199.7	1256	18998.8	1256	13929.9	1256	11985.6	1256	9013.66	1256	5362.06	1256	13343.7	1256	11675
1257	19043	1257	19116.1	1257	14077.8	1257	11824.6	1257	7729.1	1257	5573.38	1257	12276.6	1257	11927.9
1258	18872.8	1258	16990.8	1258	13993.1	1258	11128	1258	5742.97	1258	3695.51	1258	11932.4	1258	9895.91
1259	18795.1	1259	17670.9	1259	12813.9	1259	9266.63	1259	5520.01	1259	2723.18	1259	12229.8	1259	10597.3
1260	18408.7	1260	17818.1	1260	11343	1260	7450.8	1260	10394.3	1260	7283.68	1260	14275.7	1260	12036
1261	17026	1261	16549.3	1261	11065.5	1261	7637.6	1261	10511.5	1261	7709.63	1261	14059	1261	10991.6
1262	14483.5	1262	13907.6	1262	10105.3	1262	6297.31	1262	11534.9	1262	8699.51	1262	14482.8	1262	11653.6
1263	12959.9	1263	11075.3	1263	12533.4	1263	9165.78	1263	11421.8	1263	7562.91	1263	13296.5	1263	11040.8
1264	8900.2	1264	6851.72	1264	13396.7	1264	10269.3	1264	11417.2	1264	8445.65	1264	14050.5	1264	11483.3
1265	5873.01	1265	5331.77	1265	13423.5	1265	9204.97	1265	11575.3	1265	8880.17	1265	15241	1265	14094.8
1266	3715.38	1266	4840.2	1266	14523.3	1266	11551.8	1266	12448.3	1266	9786.25	1266	16772	1266	15514.1
1267	1958.1	1267	3887.04	1267	13838.8	1267	11847.9	1267	13360	1267	12009.5	1267	16642	1267	16703.1
1268	1650.91	1268	3380.98	1268	13588.7	1268	11487.3	1268	13067.5	1268	13198.8	1268	16579.4	1268	16796.9
1269	2701.93	1269	3934.97	1269	15784.6	1269	13165.2	1269	13451.5	1269	12796.4	1269	15387.4	1269	15353.7
1270	4249.53	1270	4711.09	1270	19734.5	1270	16702.9	1270	13220.2	1270	11279.2	1270	14355.9	1270	14079.9
1271	4881.65	1271	4527.8	1271	23257.1	1271	20095.3	1271	12630.2	1271	9437.25	1271	13890.6	1271	11344.1
1272	5085.98	1272	3817.2	1272	20405.5	1272	16340.8	1272	11847.3	1272	9549.33	1272	17188.6	1272	13692.5
1273	6778.91	1273	6663.25	1273	17405.6	1273	14038.4	1273	12256.4	1273	9500.32	1273	16557.3	1273	13360.2
1274	8328.45	1274	8880.84	1274	13648.6	1274	10822.9	1274	13143.2	1274	11835	1274	17839.4	1274	12855.9
1275	10054.5	1275	11544.2	1275	12315.5	1275	11270.5	1275	11532.4	1275	11348.8	1275	18621	1275	12988.7
1276	10180.1	1276	12197.9	1276	14261.8	1276	13718.8	1276	11256.4	1276	10649.9	1276	16866.4	1276	13024.7
1277	8434.15	1277	8933.78	1277	15884.5	1277	14315	1277	11962.1	1277	10044.4	1277	17250.7	1277	13130.7
1278	7245.82	1278	8207.72	1278	17724.6	1278	16118.4	1278	11203.8	1278	8546.9	1278	16505	1278	12560.1
1279	8070.21	1279	8793.11	1279	16818.8	1279	15103.8	1279	9876.69	1279	8346.69	1279	15330.8	1279	11318.6
1280	9562.52	1280	7346.57	1280	13825.1	1280	12216.8	1280	10082	1280	8595.04	1280	12721.5	1280	11789
1281	10566.1	1281	7966.98	1281	11443.3	1281	10740.2	1281	12174.2	1281	10446.8	1281	11660.1	1281	9359.05
1282	9920.42	1282	7565.58	1282	14493.1	1282	13989.1	1282	14563.7	1282	12917.6	1282	10986.7	1282	9812.42
1283	10208.5	1283	7866.61	1283	13832.3	1283	11750.2	1283	14216.7	1283	12604.6	1283	11423.2	1283	8335.81
1284	9123.89	1284	8016.89	1284	12057.1	1284	10261.4	1284	12891.8	1284	10059.9	1284	12166.9	1284	7930.18
1285	10717	1285	7602.74	1285	13334.4	1285	12204.2	1285	11177.9	1285	9253.01	1285	11051.4	1285	9099.25
1286	15699.6	1286	14360.3	1286	9811.94	1286	8668.08	1286	13083.3	1286	10467.7	1286	12541.1	1286	10291
1287	16206.7	1287	14847.2	1287	8781.12	1287	8572.06	1287	15060.6	1287	13382.8	1287	14501.1	1287	11532
1288	16916.7	1288	17581.4	1288	9564.57	1288	9044.03	1288	13930.3	1288	11879.2	1288	14536.6	1288	11241.5
1289	18547.4	1289	20245	1289	9705.44	1289	9276.08	1289	13240.5	1289	10992.4	1289	14297.3	1289	12085.8
1290	17838	1290	18029	1290	10253.2	1290	9192.4	1290	15455.7	1290	12846.8	1290	14234	1290	11777.3
1291	15157.3	1291	14105.3	1291	14393.9	1291	13598.5	1291	16597.6	1291	14275.7	1291	13712.9	1291	11960.4
1292	12743.8	1292	12083.1	1292	20126.2	1292	18191.2	1292	17802.4	1292	14990.3	1292	13780.4	1292	12666.7
1293	15981.3	1293	15836.1	1293	22175.9	1293	20266.3	1293	17844.4	1293	15116.5	1293	12512.9	1293	12514.1
1294	12375.5	1294	12305.2	1294	16634.7	1294	16432.1	1294	16481.4	1294	12990.2	1294	11677	1294	10445.6
1295	12181.2	1295	11599.9	1295	21688	1295	20663.6	1295	14419.3	1295	11118.5	1295	10973.5	1295	10541.8
1296	11549.2	1296	10737	1296	24051.5	1296	21238.6	1296	14456.1	1296	10655.9	1296	9349.13	1296	8365.76
1297	11379.7	1297	10777.9	1297	21249.1	1297	17553.9	1297	13090.1	1297	9706.79	1297	8678.82	1297	7068.3
1298	11680.1	1298	9756.74	1298	20312.7	1298	15558.5	1298	12516.1	1298	9826.7	1298	8009.51	1298	6877.22
1299	10075.6	1299	7597.23	1299	16409.9	1299	11999	1299	13013.5	1299	9106.18	1299	8295.04	1299	6867.06
1300	7174.81	1300	6534.2	1300	12842.8	1300	11149.7	1300	11842.5	1300	8834.83	1300	9525.51	1300	9666.75
1301	7411.13	1301	6513.56	1301	11792.8	1301	11312.7	1301	12529.8	1301	9133.83	1301	9161.71	1301	10297
1302	5617.43	1302	4446.37	1302	12480.4	1302	13411.9	1302	12553.1	1302	8519.46	1302	8830.46	1302	10933.9
1303	6035.59	1303	5303.62	1303	15772.6	1303	17798.8	1303	10867.8	1303	6704.44	1303	8166.02	1303	10232.6
1304	9239	1304	7745.12	1304	14409.6	1304	15718.6	1304	7381.87	1304	4741.11	1304	8003.67	1304	8854.54
1305	6091.82	1305	5704.33	1305	17713	1305	18475.6	1305	5411.17	1305	3467.9	1305	7896.82	1305	5774
1306	6819.62	1306	6185.12	1306	17017	1306	16748	1306	3773.62	1306	1788.21	1306	7411.72	1306	6670.93
1307	6961.38	1307	7160.14	1307	16972.4	1307	15978.2	1307	2685.29	1307	1284.67	1307	7999.71	1307	6577.77
1308	5462.85	1308	6595.2	1308	18575.4	1308	17174.1	1308	2577.85	1308	1986.99	1308	8829.49	1308	7847.03
1309	6132.57	1309	7961.65	1309	21872.2	1309	17995.3	1309	4803.55	1309	4594.18	1309	8719.95	1309	7975.42
1310	6899.71	1310	8640.33	1310	19418.8	1310	17441.4	1310	7121.53	1310	5652.03	1310	9338.3	1310	9026.09
1311	5292.64	1311	7341.73	1311	19353.1	1311	14707.7	1311	7817.4	1311	5747.79	1311	12334.5	1311	9063.76
1312	9240.72	1312	10761.2	1312	18278.9	1312	14767.1	1312	7159.68	1312	4999.62	1312	10226.9	1312	8435.98
1313	7626.47	1313	8914.71	1313	17754.3	1313	15984.3	1313	8567.18	1313	6580.46	1313	11831.3	1313	10808.7
1314	10397.2	1314	9837.39	1314	17048.8	1314	15061.8	1314	9449.41	1314	7759.7	1314	15818.5	1314	11234.3
1315	11636.3	1315	11577.6	1315	16239.7	1315	14883.2	1315	8685.35	1315	7580.7	1315	12695.7	1315	10566.8
1316	11675.4	1316	11257.4	1316	17191.3	1316	14052.8	1316	7962.17	1316	7172.89	1316	13931.4	1316	13306.4
1317	12756.1	1317	12684.2	1317	17780	1317	14604.7	1317	6588.6	1317	5389.93	1317	16099.4	1317	12647.3
1318	15347.8	1318	14766.8	1318	16271.4	1318	13029.4	1318	4551.07	1318	3425.57	1318	15677.9	1318	13993.3
1319	14901.9	1319	14854.4	1319	14421.1	1319	12170.9	1319	3415.68	1319	1882.78	1319	16727	1319	13229.1
1320	15391.8	1320	15710.2	1320	15582.6	1320	12410.2	1320	2305.49	1320	2268.89	1320	16809.8	1320	14945
1321	16036.2	1321	14710.7	1321	15192.4	1321	12506.6	1321	1276.87	1321	774.306	1321	15498.6	1321	14336.9
1322	16391.9	1322	15309.2	1322	13494.2	1322	13193.7	1322	1477.71	1322	993.017	1322	12966.9	1322	11024.6
1323	15569.5	1323	14655.1	1323	14172	1323	14451.9	1323	1992.29	1323	1499.81	1323	11820.2	1323	10253
1324	15322.9	1324	14162.7	1324	14115.6	1324	14477.3	1324	2440.4	1324	2210.39	1324	10828.1	1324	9961.04
1325	15313.8	1325	14619.9	1325	14138	1325	13655.4	1325	2970.88	1325	2531.68	1325	11270.7	1325	10005.6
1326	15513	1326	14733.2	1326	13682.4	1326	12215.3	1326	4172.61	1326	3602.45	1326	10741.8	1326	9918.31
1327	15278.6	1327	14258.2	1327	12702.9	1327	11555.2	1327	4837.72	1327	4399.47	1327	9731.56	1327	10114.1
1328	16110	1328	13720.7	1328	17528.2	1328	18619.7	1328	5916.6	1328	5005.49	1328	8524.3	1328	8494.84
1329	16033.2	1329	13462.9	1329	14968.9	1329	14972.7	1329	6317.35	1329	5659.73	1329	7765.35	1329	6649.85
1330	14741.7	1330	14237.1	1330	16735.3	1330	16435.9	1330	5739.87	1330	5529.9	1330	7495.11	1330	6105.94
1331	15660.7	1331	14042.1	1331	18679.8	1331	15997.1	1331	7714.05	1331	6834.82	1331	8871.69	1331	6602.66
1332	15389.8	1332	14389.6	1332	16985.3	1332	14724.8	1332	7528.15	1332	6064.94	1332	9312.68	1332	6237.2
1333	16880	1333	14780.7	1333	17651.8	1333	16266	1333	6956.56	1333	5636.66	1333	8787.29	1333	5795.51
1334	17643.6	1334	15371.5	1334	18235.7	1334	16491.8	1334	6475.24	1334	5216.98	1334	8475.17	1334	5904.92
1335	18033.8	1335	16265.4	1335	19119.6	1335	16493.9	1335	6655.99	1335	5750.99	1335	8470.8	1335	5490.14
1336	17616.7	1336	14468.9	1336	21409.5	1336	19750.3	1336	7046.77	1336	5519.33	1336	8148.16	1336	4675.32
1337	16190.5	1337	14269.4	1337	23655.9	1337	21807.2	1337	7199.15	1337	7079.09	1337	7771.53	1337	6013.07
1338	16059.6	1338	15887.7	1338	23610.4	1338	20782.4	1338	7780.41	1338	7810.98	1338	7201.89	1338	5588.77
1339	16283.2	1339	15554.2	1339	24480.4	1339	21709.5	1339	7650.24	1339	8373.49	1339	8693.06	1339	6544.24
1340	16937.8	1340	16543.2	1340	23473.7	1340	22445.3	1340	8176.09	1340	8223	1340	11360.6	1340	9472.22
1341	18619.1	1341	19616.5	1341	22908.5	1341	20587.4	1341	9104.54	1341	10036	1341	8540.94	1341	6546.99
1342	17159.3	1342	20588	1342	22738.7	1342	18084.7	1342	10167.6	1342	9309.18	1342	11723.2	1342	11749.5
1343	14119	1343	15970.8	1343	22842.9	1343	19715.7	1343	11236.2	1343	9810.42	1343	10333.5	1343	12876
1344	10390.5	1344	11188.1	1344	25890	1344	22158.1	1344	11317.2	1344	8877.4	1344	10627.5	1344	12148.2
1345	8120.77	1345	7837.27	1345	29178.4	1345	24483.6	1345	11709.6	1345	9336.72	1345	10341.4	1345	10699
1346	8631.27	1346	7442.82	1346	31480.9	1346	26563.8	1346	11873.9	1346	8585	1346	10253.1	1346	11370.2
1347	10157.4	1347	9284.56	1347	28678.5	1347	24802.8	1347	13233.5	1347	10507.4	1347	11501.9	1347	12052.5
1348	10460.8	1348	11048.4	1348	21764.3	1348	19636.8	1348	14262.9	1348	10542.8	1348	10962.7	1348	11089.1
1349	10892.8	1349	10202.7	1349	15127	1349	15320	1349	13427.8	1349	10751.5	1349	12805.7	1349	11572.8
1350	10072.4	1350	8235.08	1350	15651.8	1350	15125.9	1350	12832.5	1350	10459.8	1350	13207	1350	11642.4
1351	8510	1351	7248.64	1351	11297.3	1351	9260.79	1351	12750.4	1351	11595.5	1351	12188.4	1351	11668.2
1352	9047.99	1352	9135.44	1352	13508.5	1352	12187.3	1352	13318.1	1352	12630	1352	10314.1	1352	10092.6
1353	8737.31	1353	9215.32	1353	17520.4	1353	16418.7	1353	15084.9	1353	14065.1	1353	11362.8	1353	10785.9
1354	8519.98	1354	8711.41	1354	22963.4	1354	21744	1354	13344.7	1354	12880.1	1354	10320.3	1354	8825.38
1355	8822.74	1355	8337.76	1355	17382.3	1355	14939	1355	14221.3	1355	12817.1	1355	9554.77	1355	7376.64
1356	10237.4	1356	8219.84	1356	16367.3	1356	12748.5	1356	13946.4	1356	13430.1	1356	10266.3	1356	8001.39
1357	10833.2	1357	8669.44	1357	18166.6	1357	15540.3	1357	14883.2	1357	11835.3	1357	11898.5	1357	9900.02
1358	11403.8	1358	9896.43	1358	19509.7	1358	18198	1358	13125.7	1358	9707.43	1358	12690.8	1358	12001.5
1359	11622	1359	10644.7	1359	21135.7	1359	18111	1359	12717.7	1359	9429	1359	12541.2	1359	12583.1
1360	11670.2	1360	11108.5	1360	11794.9	1360	10705.1	1360	12429.9	1360	8886.49	1360	12338.6	1360	15669.4
1361	11231.2	1361	11203.1	1361	21491	1361	18420.4	1361	12457.3	1361	8594.58	1361	11468.6	1361	13965.5
1362	13460.4	1362	13075.3	1362	25505.5	1362	21842.9	1362	12434.9	1362	8842.95	1362	12159.5	1362	15250
1363	12852.4	1363	14205.4	1363	29136.7	1363	25769.1	1363	12059.6	1363	8657.95	1363	11852.4	1363	13852
1364	11660.3	1364	13825	1364	31308.3	1364	29426.5	1364	11053.8	1364	7496.79	1364	11530.3	1364	13349.5
1365	11797.6	1365	11564.2	1365	19931.3	1365	14743.2	1365	9663.4	1365	6537.97	1365	10193.9	1365	10692
1366	9970.49	1366	7732.73	1366	31459.9	1366	29671.9	1366	8459.38	1366	6041.37	1366	9779.8	1366	9022.74
1367	11222.4	1367	10017.6	1367	33734.2	1367	33643.1	1367	7538.18	1367	5443.07	1367	10231.5	1367	8907.96
1368	10670.2	1368	9081.24	1368	28079.8	1368	26228	1368	6863.45	1368	4889	1368	9793.99	1368	8317.47
1369	10741.5	1369	8412.7	1369	25263.4	1369	22119.1	1369	6179.17	1369	4288.54	1369	10661.7	1369	7269.64
1370	10913.6	1370	8196.57	1370	28864.2	1370	24420.8	1370	5756.78	1370	4125.23	1370	11028.9	1370	7666.14
1371	11912.7	1371	9697.46	1371	25539.7	1371	22698.4	1371	5713.92	1371	4325.44	1371	9775.77	1371	7265.85
1372	15618.3	1372	13517.1	1372	22705.9	1372	19396.2	1372	6052.96	1372	4840.78	1372	7682.85	1372	5781.57
1373	14609.9	1373	11607.7	1373	21593.3	1373	18547.5	1373	6119.58	1373	4851.57	1373	8818.02	1373	9358.52
1374	18294.5	1374	15358.3	1374	21462.9	1374	18214.8	1374	5495.23	1374	4590.69	1374	9562.84	1374	10174.1
1375	21244.7	1375	17715.3	1375	20314.5	1375	16907.3	1375	6570.96	1375	6390.1	1375	9939.87	1375	11495.3
1376	24139.5	1376	22198.3	1376	21572.7	1376	17348.3	1376	5811.09	1376	5192.55	1376	10842.8	1376	11315.5
1377	23121	1377	21714.3	1377	20278.2	1377	17211.5	1377	4887.71	1377	3548.23	1377	10261.9	1377	8985.26
1378	22456.5	1378	21868.9	1378	21828.7	1378	21494.1	1378	4999.82	1378	3454.55	1378	9349.95	1378	8160.4
1379	22152.6	1379	21068	1379	20355.3	1379	20914.9	1379	5378.61	1379	4451.88	1379	8636.15	1379	7449.17
1380	18676.9	1380	17375.2	1380	19145.5	1380	18749.5	1380	6173.73	1380	5115.98	1380	8475.03	1380	8683.14
1381	15122.8	1381	13230.1	1381	17743.2	1381	16748.2	1381	7017.67	1381	5618.07	1381	7429.43	1381	7836.5
1382	13530	1382	10637	1382	15982.5	1382	14826	1382	5743.98	1382	5106.05	1382	6914.23	1382	6370.47
1383	13307.2	1383	10851	1383	14556.6	1383	13714.1	1383	5501.06	1383	5194.62	1383	6813.43	1383	7792.03
1384	12609.9	1384	10924.1	1384	14353.7	1384	13980.1	1384	6457.53	1384	5529.87	1384	7814.14	1384	7416.63
1385	13560.4	1385	12371.9	1385	12622.4	1385	11195.7	1385	6805.07	1385	5252.1	1385	8455.63	1385	8093.81
1386	10600	1386	13093.1	1386	12125.2	1386	11043.9	1386	7140.64	1386	5613.19	1386	8847.74	1386	7092.88
1387	10578	1387	12448.8	1387	10797.5	1387	9950.79	1387	6991.24	1387	5727.63	1387	8431.76	1387	5657.36
1388	10159.6	1388	12877	1388	10821.9	1388	10708.8	1388	7068.52	1388	5690.57	1388	7505.61	1388	4802.72
1389	11882.9	1389	14438.6	1389	10868.6	1389	10675.4	1389	6695.09	1389	5884.21	1389	6994.91	1389	5725.1
1390	10991.7	1390	13047.4	1390	12100.8	1390	11468.8	1390	7851.25	1390	7075.26	1390	7416.39	1390	5287.39
1391	12677.7	1391	14036.9	1391	13050.7	1391	12707.9	1391	8684.08	1391	8224.67	1391	8467.63	1391	5719.49
1392	10088.1	1392	8831.09	1392	13681.1	1392	13107.2	1392	8950.54	1392	8327.94	1392	8194.91	1392	5986.73
1393	10888	1393	8076.01	1393	13464.1	1393	12528.7	1393	10456.5	1393	10217.8	1393	8524.64	1393	5903.11
1394	11708.2	1394	10465.2	1394	14235.3	1394	12600.5	1394	10360.4	1394	10062.8	1394	8365.83	1394	6676.73
1395	10707.6	1395	10066.6	1395	15710.3	1395	15461.3	1395	8788.37	1395	7704.96	1395	7395.96	1395	5669.89
1396	10404.1	1396	9882.16	1396	15466.9	1396	15551.4	1396	8105.67	1396	6786.93	1396	6936.24	1396	5441.98
1397	10740.2	1397	9622.39	1397	16819.9	1397	14993.3	1397	7580.77	1397	6825.07	1397	5473.45	1397	4469.65
1398	11689	1398	9607.07	1398	18281.7	1398	15095.5	1398	7546.23	1398	7520.12	1398	5824.23	1398	5568.28
1399	13735.4	1399	10349.1	1399	21611.4	1399	18392	1399	8102.96	1399	7281.63	1399	7187.37	1399	4722.87
1400	15446.1	1400	11768	1400	25141.3	1400	22593.8	1400	8739.7	1400	8173.89	1400	6052.65	1400	5379.68
1401	18929.5	1401	16828.8	1401	25937.5	1401	24238.8	1401	9104.63	1401	7571.19	1401	7063.13	1401	6605.25
1402	17608.1	1402	18082.7	1402	27322	1402	24075.5	1402	8864.25	1402	7735.5	1402	8375.27	1402	6849.96
1403	16201.9	1403	17047.7	1403	26598.9	1403	21705.9	1403	9002.49	1403	7798.37	1403	8714.29	1403	7308.85
1404	18945.9	1404	19056.4	1404	24484.9	1404	19287.5	1404	8979.74	1404	8362.27	1404	10534	1404	6866.22
1405	18549.2	1405	17292.1	1405	22685.8	1405	18665.9	1405	9079.41	1405	7603.28	1405	10164.6	1405	6556.67
1406	17318.9	1406	16964.1	1406	19934.6	1406	16320.9	1406	8895.25	1406	7206.34	1406	10613.3	1406	7505.2
1407	16074.2	1407	14428.2	1407	17278.2	1407	14922	1407	8684.97	1407	7533.45	1407	11288	1407	8185.3
1408	15505.5	1408	14310.2	1408	15272.6	1408	14625	1408	8875.9	1408	7802.7	1408	9421.71	1408	7460.59
1409	13818	1409	11434.9	1409	15581	1409	14514.6	1409	9339.95	1409	8364.25	1409	10264.4	1409	8205.43
1410	14650.6	1410	13018	1410	14927.3	1410	12987.8	1410	9326.1	1410	8597.33	1410	10830.7	1410	8438.44
1411	13903.5	1411	10952.3	1411	16600.3	1411	13756.6	1411	7817.36	1411	6719.71	1411	10506	1411	8521.11
1412	13407.2	1412	12121.6	1412	18043.9	1412	15912.5	1412	9348.45	1412	8231.8	1412	11513.5	1412	9559.73
1413	14157.3	1413	14125.3	1413	17188.3	1413	15998	1413	9622.05	1413	8856.47	1413	14239.2	1413	11544.1
1414	13831.1	1414	12457.6	1414	15265.2	1414	13636.7	1414	10225	1414	9231.12	1414	14426.7	1414	11717.4
1415	14233.9	1415	13434.1	1415	14039.9	1415	12271.4	1415	9547.59	1415	8041.29	1415	14533.9	1415	12668.4
1416	14041.3	1416	13385.4	1416	14852.8	1416	13251.7	1416	9920.82	1416	8133.85	1416	13859.9	1416	11852
1417	14483.1	1417	15815.1	1417	14904.2	1417	13152.9	1417	9632.59	1417	7687.79	1417	12788.5	1417	11562.8
1418	13948.1	1418	16318.6	1418	15504.1	1418	14867.5	1418	9152.04	1418	8333.71	1418	13384.9	1418	11821.7
1419	16580	1419	16152.4	1419	17205.7	1419	16145	1419	7697.66	1419	7109.59	1419	13705.7	1419	12858.5
1420	17424.3	1420	16392.6	1420	18504.4	1420	16948	1420	6489.06	1420	6042.37	1420	12974.6	1420	11361.4
1421	19177.2	1421	17345.1	1421	18715	1421	17535.9	1421	6381.21	1421	4952.33	1421	12938	1421	11848.8
1422	18928.3	1422	16799.2	1422	19295	1422	18350.1	1422	5618.32	1422	4313.78	1422	11454.3	1422	9678
1423	20286.5	1423	19482.5	1423	19954.9	1423	18064.5	1423	5861.28	1423	5160	1423	11286.9	1423	10444
1424	17984.2	1424	17605.4	1424	19306.8	1424	15663.9	1424	5731.33	1424	5099.11	1424	10901.9	1424	10560
1425	18553.2	1425	17360.4	1425	16788.2	1425	12870.8	1425	6253.36	1425	5861.15	1425	11660.7	1425	9867.42
1426	17263.7	1426	15945.3	1426	17219.1	1426	13415.8	1426	6496.96	1426	5436.47	1426	13057.6	1426	10545.5
1427	14468.1	1427	14355	1427	17420.5	1427	13434	1427	6721.06	1427	6302.83	1427	13491.8	1427	11229.2
1428	13841.3	1428	13020.8	1428	19770.7	1428	17896.6	1428	6679.77	1428	5042.55	1428	12914.6	1428	10592.5
1429	12178.8	1429	10231.6	1429	12294.9	1429	10858.6	1429	8312.59	1429	5067.54	1429	10541.3	1429	9801.38
1430	11550.4	1430	8135.55	1430	9596.55	1430	8900.83	1430	9119.48	1430	5434.28	1430	10378.4	1430	9589.86
1431	14870.8	1431	10994.8	1431	9838.1	1431	9122.01	1431	9298.03	1431	5904.15	1431	11249.4	1431	12206.7
1432	14242.2	1432	11065.2	1432	8214.35	1432	7584.18	1432	8826.32	1432	6341.64	1432	11039.8	1432	12615.2
1433	13572	1433	11697.3	1433	6963.03	1433	6512.08	1433	7852.23	1433	6578.86	1433	10829.9	1433	10078.7
1434	10766.4	1434	9695.16	1434	6684.43	1434	7405.12	1434	8134.84	1434	7494.59	1434	11187.6	1434	9949.02
1435	10221.1	1435	8957.79	1435	7849.84	1435	8120.52	1435	8767.32	1435	8734.11	1435	8916.91	1435	8732.01
1436	9322.89	1436	9568.96	1436	11310.1	1436	11831.7	1436	9375.68	1436	9774.95	1436	10522.7	1436	11425.4
1437	10260.4	1437	11535	1437	14922.3	1437	14348.4	1437	7459.43	1437	7832.56	1437	9636.33	1437	9236.23
1438	12520.7	1438	12547.4	1438	18046.9	1438	15159.2	1438	7894.94	1438	7710.17	1438	9572.72	1438	8260.81
1439	14232.1	1439	13925.8	1439	20096.2	1439	16864.1	1439	5785.8	1439	4794.07	1439	9217.82	1439	6908.16
1440	15982	1440	14800.5	1440	21520.3	1440	17521.4	1440	4916.71	1440	4278.77	1440	9754.53	1440	7048.47
1441	15684.8	1441	13308.3	1441	21321.7	1441	18753.9	1441	5031.39	1441	4142.53	1441	10478.2	1441	8953.57
1442	19693.3	1442	15949.4	1442	19231.8	1442	18380.8	1442	3768.6	1442	2713.95	1442	11870.7	1442	10303.4
1443	19813.3	1443	16787.9	1443	16594.1	1443	15505	1443	5316.97	1443	4304.88	1443	15642.6	1443	12605.1
1444	20707.2	1444	16550.1	1444	16055.9	1444	14072.3	1444	5966.85	1444	5722.45	1444	17363.9	1444	14260.8
1445	20390.7	1445	16788.4	1445	16351.5	1445	12531.8	1445	5785.82	1445	5252.37	1445	18927.7	1445	16265.5
1446	18906.5	1446	18424.7	1446	16275.5	1446	12646.2	1446	5837.85	1446	4838.07	1446	19429.3	1446	15531.4
1447	16719.7	1447	17164.1	1447	13924.3	1447	11362.3	1447	6610.85	1447	5702.08	1447	22410	1447	22300.4
1448	16710.3	1448	15892.4	1448	12267.9	1448	9747.31	1448	7481.91	1448	6805.17	1448	23711.5	1448	22074.6
1449	19694.3	1449	18228.3	1449	11388.9	1449	9515.44	1449	6345.42	1449	5394.06	1449	23994.8	1449	22205.7
1450	19399.3	1450	16588	1450	9851.59	1450	8294.5	1450	6395.28	1450	5427.83	1450	24253.4	1450	22925.5
1451	17261.4	1451	13344.4	1451	9295.21	1451	7589.75	1451	5892.62	1451	4808.85	1451	18385.5	1451	15006.4
1452	16327.6	1452	12504.1	1452	9474.36	1452	7581.67	1452	5869.81	1452	4417.96	1452	22608.3	1452	18388.4
1453	16466.7	1453	12328.2	1453	10168.3	1453	8328.93	1453	6081.91	1453	4898.49	1453	24544.3	1453	19483.7
1454	16320.7	1454	12438.9	1454	10916	1454	9700.98	1454	5739.31	1454	4250.7	1454	26409.9	1454	22720.5
1455	13075.4	1455	8440.27	1455	11921.1	1455	10249.1	1455	6082.76	1455	4368.99	1455	31268.9	1455	26792.4
1456	16294.6	1456	12407.2	1456	11450.6	1456	10671.6	1456	5149.31	1456	3565.49	1456	29231.1	1456	28247.6
1457	13060	1457	8419.57	1457	12515.9	1457	11923	1457	6064.77	1457	4351.06	1457	25266.7	1457	23715
1458	16317.1	1458	12443.4	1458	12406.6	1458	12402.8	1458	6019.71	1458	4795.01	1458	23757.1	1458	19994.3
1459	14012.4	1459	11685.9	1459	12266.1	1459	13223	1459	5381.39	1459	4324.53	1459	24567.5	1459	19640.2
1460	15844.4	1460	13553.3	1460	12736	1460	14320.4	1460	5363.21	1460	4381.73	1460	24639.9	1460	19613
1461	16159.7	1461	14888.3	1461	11696.5	1461	12664.5	1461	5512.62	1461	4995.26	1461	22818.1	1461	19655.8
1462	15025.9	1462	11317.4	1462	11787.9	1462	11119.9	1462	6895.51	1462	6387.21	1462	17838.2	1462	15490.5
1463	13599.8	1463	9934.32	1463	11723.9	1463	10629.8	1463	8645.37	1463	7315.01	1463	17847.3	1463	17274.7
1464	14795.2	1464	10514.2	1464	11369.4	1464	11188.5	1464	10862.1	1464	8030.62	1464	16690.8	1464	17755.5
1465	13902.4	1465	12693.7	1465	13639	1465	11051.7	1465	12960.4	1465	9041.75	1465	17166	1465	18482.5
1466	14734.5	1466	13713.4	1466	14934.6	1466	12710.7	1466	8822.52	1466	6565.77	1466	17615.7	1466	18321.7
1467	14845.8	1467	14277.5	1467	16667.6	1467	16002.6	1467	9107.51	1467	7751.37	1467	17879.9	1467	18124.7
1468	15199.2	1468	14435.3	1468	17193.5	1468	18072.6	1468	8320.39	1468	6491.08	1468	16059.2	1468	14834.4
1469	15748.8	1469	14209	1469	18546.1	1469	18560	1469	6747	1469	5454.72	1469	16123.7	1469	14488
1470	15280.8	1470	13848.4	1470	19147.4	1470	17078.9	1470	5662.52	1470	4444.6	1470	14567.4	1470	13014.5
1471	15358.1	1471	14624.7	1471	17682.4	1471	16737.4	1471	5840.76	1471	4823.68	1471	12302.2	1471	10039.3
1472	15177.9	1472	14752.5	1472	16476.6	1472	15720.8	1472	7021.94	1472	5641.61	1472	14209.2	1472	11804
1473	15314.9	1473	13217.2	1473	15807	1473	15433.8	1473	6801.56	1473	5594.59	1473	11793.9	1473	8077.9
1474	15599.2	1474	14959.5	1474	17354.9	1474	16978.3	1474	7043.99	1474	6023.74	1474	10927.5	1474	5927.11
1475	14294.7	1475	12459.3	1475	16842.8	1475	15999.5	1475	7437.54	1475	6122.1	1475	11201.6	1475	6794.58
1476	14147.3	1476	12050.5	1476	16113.2	1476	14793.9	1476	7782.49	1476	6255.58	1476	11745.1	1476	6190.25
1477	15480	1477	13994.5	1477	15021.8	1477	12981.9	1477	8392.42	1477	6676.12	1477	13231.9	1477	6693.67
1478	15682.3	1478	14864.6	1478	16056	1478	14073.8	1478	8356.66	1478	7110.82	1478	14191.7	1478	7008.02
1479	14380.3	1479	13617.8	1479	18033.8	1479	17592.2	1479	8158.9	1479	6805.03	1479	15826.4	1479	9447.31
1480	13073.7	1480	11262.6	1480	17381.1	1480	19554.2	1480	8651.03	1480	6797.06	1480	14918.1	1480	10865.9
1481	11296.1	1481	9910.07	1481	15736.2	1481	16902.8	1481	8756.55	1481	7399.86	1481	12258.6	1481	9785.08
1482	8793.85	1482	8044.74	1482	14033	1482	15437	1482	8718.31	1482	7529.22	1482	14880.1	1482	12294.6
1483	7347.67	1483	6098.95	1483	13521.9	1483	13366.5	1483	8928.59	1483	7809.52	1483	14238.7	1483	12391
1484	8703.58	1484	8283.73	1484	16915.6	1484	15671.8	1484	8576.77	1484	7063.87	1484	10899.7	1484	9132.99
1485	10323.6	1485	9001.18	1485	17574.9	1485	15926.4	1485	8437.96	1485	6437.48	1485	9691.45	1485	9073.21
1486	10523.7	1486	9643.78	1486	16919.4	1486	16122.6	1486	8904.93	1486	6963.31	1486	9328.69	1486	8789.63
1487	10525.4	1487	9168.56	1487	16589.7	1487	14843.9	1487	9294.33	1487	7795.82	1487	9529.19	1487	8134.3
1488	10464.3	1488	9461.87	1488	17537.5	1488	15183.5	1488	10417.6	1488	8846.97	1488	10693.2	1488	8827.38
1489	9943.23	1489	8612.62	1489	20131.4	1489	18214.1	1489	12220.6	1489	10752.9	1489	13524	1489	12244.7
1490	9349.29	1490	9043.35	1490	17531.5	1490	15776.3	1490	13104	1490	11868.2	1490	17264.4	1490	16165.7
1491	9410.25	1491	9002.18	1491	17141.4	1491	15209.3	1491	13679.3	1491	11270.8	1491	14835.1	1491	14405.3
1492	9864.64	1492	8935.73	1492	15637	1492	14088.9	1492	14225.9	1492	11915.2	1492	12840.3	1492	9545.19
1493	9060	1493	9000.79	1493	15841.6	1493	13977.5	1493	14658.5	1493	13247	1493	14905.7	1493	12663.5
1494	10034.8	1494	9008.79	1494	17978.1	1494	17614.1	1494	15656.9	1494	13193.1	1494	14787.2	1494	13568.8
1495	11145	1495	9389.73	1495	15734.2	1495	15587.9	1495	17318.6	1495	14304.6	1495	10890	1495	11504.9
1496	11520.2	1496	10509.1	1496	16751.6	1496	15287.8	1496	16338.9	1496	14142.1	1496	10526.8	1496	11118.6
1497	10507.9	1497	9437.53	1497	17679.1	1497	17036.6	1497	14566.7	1497	13196.1	1497	11227.3	1497	9031.18
1498	11718.6	1498	11776.6	1498	17336.2	1498	17360	1498	15042	1498	12379.7	1498	8195.03	1498	5095.69
1499	11293.7	1499	12619.8	1499	17386.1	1499	17265	1499	16461.3	1499	13115.1	1499	5386.56	1499	2861.97
1500	9866.88	1500	10770.4	1500	17611.1	1500	16100.2	1500	15742.8	1500	12339.1	1500	7385.58	1500	6151.67
1501	9307.65	1501	9616.1	1501	15856.1	1501	14800.7	1501	15149.7	1501	12859.6	1501	10802.4	1501	10613.6
1502	10004.7	1502	8680.92	1502	13505.8	1502	13290.9	1502	14941.6	1502	13702.7	1502	16040.3	1502	14588
1503	10429.9	1503	7462.05	1503	10012.5	1503	10230.5	1503	15863.1	1503	12954.9	1503	13808.5	1503	12603.9
1504	11099.9	1504	9024.82	1504	8848.5	1504	8547.51	1504	14790.6	1504	12619.2	1504	16267.2	1504	16441.2
1505	11526.4	1505	9434.15	1505	9396.25	1505	7973.54	1505	13660.6	1505	12098.5	1505	18415.4	1505	16704.1
1506	12333.1	1506	10635.4	1506	9547.57	1506	8131.34	1506	12630.6	1506	10748.6	1506	15135.5	1506	13112.2
1507	12456.1	1507	10237.4	1507	8545.43	1507	7476.19	1507	12730.6	1507	10215.5	1507	15471.2	1507	13041
1508	11869.1	1508	9478.19	1508	8443.54	1508	7609	1508	12652.4	1508	10596.7	1508	15243.6	1508	12334.4
1509	12124.7	1509	10427.3	1509	8590.64	1509	7828.35	1509	13765.7	1509	12195.1	1509	17487	1509	14902.6
1510	12446	1510	10929.2	1510	9074.12	1510	8274.06	1510	14578.2	1510	11523.2	1510	20032	1510	17826.4
1511	12364.9	1511	9271.36	1511	9613.62	1511	8869.01	1511	16039.2	1511	12181.9	1511	22043.3	1511	19514.1
1512	13755.4	1512	11043	1512	9734.2	1512	9551.35	1512	17086.9	1512	14053.1	1512	21692.2	1512	21378.5
1513	14840.3	1513	12686.6	1513	8855.38	1513	8699.36	1513	17511	1513	14134.9	1513	23211.3	1513	21100.7
1514	16079.9	1514	12209.8	1514	9180.4	1514	8709.78	1514	15461.5	1514	12477.1	1514	18393.7	1514	16540.6
1515	15146.5	1515	12493.9	1515	9778.07	1515	8617.57	1515	15040.2	1515	12633.5	1515	16313.7	1515	12299.9
1516	14994.1	1516	13869.7	1516	12130.5	1516	10199.5	1516	12217.8	1516	10417.1	1516	16126.8	1516	12346.5
1517	14065.7	1517	12325.4	1517	15346.1	1517	12593.8	1517	10818.8	1517	9221.69	1517	13084	1517	7258.08
1518	13035.2	1518	13123.4	1518	16838.4	1518	13899.9	1518	11809.6	1518	10617.2	1518	12966.7	1518	8627.9
1519	11928.3	1519	11216.7	1519	17898.4	1519	14838.8	1519	12545.2	1519	11794.1	1519	11765.2	1519	7898.99
1520	12159.9	1520	10788.4	1520	19349.2	1520	16002.3	1520	11992.9	1520	10706.9	1520	11415	1520	7628.72
1521	11616.5	1521	10071.2	1521	22583.6	1521	18696.6	1521	12175.9	1521	10976.4	1521	11823	1521	8641.33
1522	11952.5	1522	10489.3	1522	26118.7	1522	21979.1	1522	11969.3	1522	10908.6	1522	14247	1522	15124.6
1523	10795.5	1523	10364.3	1523	28903.8	1523	23940.6	1523	9796.66	1523	8448.62	1523	16014	1523	18130.2
1524	8949.85	1524	9675.96	1524	26327.8	1524	21820.1	1524	8488.65	1524	6838.17	1524	16593.7	1524	18199.2
1525	7684.87	1525	8667.91	1525	30164.9	1525	25086.3	1525	8707.44	1525	7350.27	1525	16008.3	1525	17395.6
1526	7572.24	1526	8486.32	1526	28808.1	1526	23932.2	1526	8718.25	1526	7263.71	1526	16512.7	1526	18190.3
1527	7164.34	1527	8208.17	1527	29940	1527	26159.8	1527	6983.29	1527	5657.79	1527	16021	1527	16861.2
1528	7423.77	1528	8267.54	1528	27779.2	1528	25308.2	1528	7043.3	1528	6310.86	1528	18003.9	1528	20403.9
1529	7416.29	1529	7660.67	1529	25391.4	1529	23124.2	1529	7619.72	1529	6657.42	1529	19393.3	1529	21191.7
1530	7641.06	1530	7612.69	1530	24778	1530	22199.3	1530	7730.87	1530	6804.81	1530	18888.4	1530	22086.7
1531	7388.49	1531	6986.73	1531	25509.3	1531	23244.8	1531	7841.26	1531	7005.34	1531	18039.5	1531	20000.6
1532	8481.24	1532	6891.88	1532	21293.2	1532	20821.2	1532	7283.74	1532	6833.43	1532	18567.9	1532	17906.6
1533	9540.39	1533	7704.12	1533	19463.5	1533	18347.7	1533	8720.32	1533	7642.21	1533	16987.7	1533	15804.3
1534	11232.6	1534	9790.53	1534	20470.3	1534	20285.9	1534	7504.46	1534	7099.83	1534	16001.7	1534	15803.1
1535	10268.2	1535	8540.19	1535	19171.6	1535	16766.5	1535	9280.98	1535	8479.45	1535	15508	1535	15679.5
1536	10171.4	1536	9160.24	1536	19148.1	1536	14110.1	1536	8246.56	1536	6674.44	1536	13993.7	1536	15129.1
1537	9918.73	1537	9701.76	1537	19111.8	1537	14312.1	1537	9001.13	1537	6584.11	1537	13633.9	1537	13797.2
1538	10338.1	1538	11581.1	1538	16779.9	1538	12714.9	1538	8195.9	1538	6013.74	1538	12532.3	1538	13613.3
1539	9302.61	1539	12346.2	1539	10663.1	1539	6830.84	1539	8481.92	1539	6714.81	1539	11959.7	1539	13303.4
1540	10745.7	1540	9989.23	1540	10571.6	1540	7816.82	1540	8988.07	1540	7343.67	1540	12396.3	1540	13114.5
1541	10993.1	1541	12542.8	1541	9661.69	1541	7737.14	1541	9169.28	1541	7632.36	1541	12384.1	1541	11694.1
1542	11860.1	1542	11939.8	1542	7443.08	1542	6586.35	1542	13127.5	1542	11810.3	1542	10621.2	1542	9530.18
1543	13215.6	1543	11757.2	1543	7973.91	1543	9019.07	1543	14932.1	1543	13071	1543	11376.2	1543	11039.3
1544	13713.9	1544	11807	1544	9852.84	1544	10786.5	1544	13132	1544	10516.8	1544	11770.8	1544	12414.3
1545	14876.7	1545	12101.4	1545	11325.9	1545	11319.3	1545	12541.2	1545	8746.22	1545	14133	1545	17058.4
1546	16701.9	1546	13638.6	1546	17076.7	1546	13944.4	1546	11362.9	1546	7409.62	1546	13890.6	1546	13834
1547	20080	1547	16418.7	1547	16218.9	1547	13059.5	1547	12233.3	1547	8572.35	1547	14373.5	1547	13534
1548	22973.6	1548	23613.1	1548	17858.2	1548	12744.7	1548	12365.8	1548	9335.82	1548	17092	1548	15241
1549	21786.9	1549	21473.3	1549	16794.4	1549	10458.6	1549	11089.6	1549	8488.46	1549	18255.6	1549	17648.7
1550	20288.6	1550	20898.1	1550	13611.3	1550	8431.92	1550	11126.4	1550	9186.75	1550	19227.1	1550	18100.8
1551	18506.1	1551	20739.4	1551	21364.5	1551	15107.7	1551	10776	1551	9460.91	1551	20725.8	1551	21378.1
1552	17086.5	1552	19579.5	1552	13576.4	1552	8401.46	1552	11471	1552	9884.85	1552	20367.8	1552	20095.7
1553	20244	1553	21455.3	1553	10468.8	1553	7325.7	1553	11898.7	1553	9942.87	1553	18407.8	1553	16403.9
1554	19332.3	1554	24241.7	1554	9281.31	1554	6798.8	1554	12302.9	1554	10266.5	1554	15554.4	1554	13788.6
1555	19284.4	1555	24948.1	1555	7785.57	1555	5448.29	1555	11391.1	1555	9625.93	1555	16800.8	1555	14821.3
1556	20585.2	1556	22539.6	1556	7616.71	1556	6884.43	1556	12506.6	1556	10190.5	1556	16531	1556	15662.9
1557	20744.8	1557	26221.1	1557	10297.4	1557	8441.24	1557	11760.7	1557	9550.95	1557	18095.2	1557	18135
1558	18831.1	1558	19092.4	1558	10602.3	1558	9377.56	1558	11033.1	1558	9206.65	1558	17163.9	1558	16451.9
1559	15037.6	1559	13554.3	1559	11267.9	1559	9783.6	1559	9577.2	1559	8520.89	1559	18866.5	1559	19464.9
1560	13989.2	1560	14454.1	1560	13176.3	1560	12041.5	1560	9642.34	1560	8562.5	1560	20182.8	1560	22465.9
1561	11771.5	1561	10644.3	1561	17261.4	1561	17113.7	1561	9821.2	1561	8678.34	1561	20118	1561	23059.2
1562	12836.9	1562	12938.2	1562	15269.6	1562	15301.4	1562	10096.2	1562	8793.61	1562	19363.9	1562	19979.5
1563	11594	1563	13131	1563	15664.4	1563	14680.3	1563	12101.9	1563	10660.5	1563	18109.1	1563	15750.9
1564	9442.78	1564	9045.31	1564	17430.2	1564	15802.1	1564	12339.3	1564	10789.6	1564	14419.7	1564	11456.8
1565	11107	1565	11442	1565	16631.6	1565	15591.5	1565	9802.95	1565	7317.68	1565	9686.3	1565	7102.05
1566	9906.2	1566	11402.1	1566	16910.6	1566	16179.8	1566	8236.59	1566	6441.85	1566	12554.3	1566	10010.4
1567	9525.36	1567	8723.75	1567	16886.2	1567	15274.1	1567	7686.55	1567	6429.06	1567	12740.6	1567	11637.8
1568	9735.18	1568	10326.6	1568	15961.4	1568	13420.7	1568	7969.14	1568	6584.16	1568	11789.3	1568	10209.5
1569	10776.3	1569	11621.5	1569	16067.2	1569	13287.9	1569	8276.43	1569	6799.76	1569	10384.1	1569	9238.26
1570	9995.1	1570	10558.7	1570	14987.3	1570	11167	1570	7315.79	1570	6317.39	1570	9335.35	1570	7214.68
1571	11321.9	1571	11172.7	1571	12698.4	1571	9631.28	1571	6739.12	1571	6162.98	1571	12758.7	1571	11171.6
1572	11893.3	1572	12012	1572	11367.7	1572	8914.79	1572	6056.19	1572	5806.99	1572	11673.8	1572	10754.8
1573	10643	1573	10617.2	1573	10777	1573	8732.61	1573	6088.98	1573	5726.99	1573	11721.8	1573	10776.7
1574	8798.15	1574	10087.2	1574	11972.2	1574	10591.1	1574	6547.25	1574	6430.75	1574	12822.5	1574	10515.7
1575	6988.81	1575	7940.88	1575	12771.8	1575	10915.2	1575	6396.16	1575	6497.84	1575	13968.6	1575	10635.6
1576	6895.68	1576	5763.62	1576	13088.5	1576	10357.2	1576	6048.3	1576	5500.29	1576	14785.5	1576	10700.2
1577	7439.73	1577	5108.11	1577	13877.6	1577	10782.6	1577	5659.05	1577	5094.71	1577	13587.4	1577	10338.8
1578	8025.17	1578	5304.42	1578	15388.7	1578	13626.5	1578	5259.13	1578	4102.59	1578	12009.5	1578	10339.2
1579	7462.19	1579	5800.04	1579	17684.8	1579	17449.2	1579	5308.43	1579	4156.02	1579	13902.2	1579	11253.2
1580	7007.92	1580	5836.12	1580	19024.4	1580	17695.5	1580	5676.69	1580	3884.29	1580	12121.3	1580	10239.4
1581	7286.73	1581	5512.56	1581	16007.5	1581	16162.8	1581	5126.26	1581	3755.63	1581	11524.1	1581	11123.3
1582	6937.11	1582	5478.19	1582	15658	1582	15823.4	1582	6229.56	1582	4406.52	1582	10144.4	1582	8919.98
1583	7478.24	1583	4555.24	1583	12200.6	1583	13408.6	1583	9008.91	1583	5608.1	1583	9228.67	1583	7935.64
1584	6415.87	1584	3940.57	1584	11548.1	1584	11582.5	1584	11617.5	1584	8351.55	1584	7728.21	1584	7300.25
1585	4527.81	1585	3493.12	1585	12792.3	1585	13005	1585	11690.3	1585	9227.5	1585	8751.59	1585	9012.12
1586	4532.53	1586	3740.01	1586	12442.8	1586	12336.1	1586	10687.6	1586	7450.24	1586	6982.5	1586	8371.25
1587	4642.29	1587	3389.61	1587	12574.4	1587	11761.2	1587	10252.1	1587	7412.62	1587	9114.61	1587	10048.3
1588	4476.47	1588	3420.96	1588	14167.9	1588	12385.9	1588	8964.14	1588	8340.43	1588	11661.3	1588	11347.7
1589	5054.48	1589	3736.06	1589	16481.5	1589	12410.7	1589	8899.86	1589	8608.23	1589	12394.5	1589	10420.2
1590	6322.09	1590	6124.8	1590	17103.9	1590	14227.5	1590	8859.84	1590	8167.94	1590	13218.8	1590	11117.7
1591	6864.48	1591	7508.81	1591	17425.6	1591	15875.2	1591	9449.8	1591	7717.35	1591	12421.3	1591	11551.5
1592	6272.7	1592	7297.27	1592	15303.9	1592	14628.9	1592	9089.85	1592	7566.38	1592	10727.5	1592	10704.9
1593	7070.1	1593	9211.51	1593	13582.1	1593	13522.3	1593	8440.8	1593	6896.68	1593	8794.56	1593	6821.86
1594	9978.19	1594	11362.7	1594	14398.9	1594	12257.3	1594	7890.61	1594	6990	1594	8618.09	1594	7795.22
1595	9267.17	1595	10953	1595	17281.4	1595	14695.4	1595	6818.84	1595	6203.06	1595	10357.4	1595	9517.08
1596	8412.26	1596	10170	1596	18652.1	1596	18747.4	1596	6299.07	1596	5208.62	1596	11249.3	1596	11147.8
1597	8580.14	1597	9421.84	1597	17073.1	1597	15652.2	1597	7583.1	1597	6055.59	1597	13072.6	1597	9241.85
1598	8182.07	1598	8450.38	1598	16975.2	1598	17409.8	1598	7437.47	1598	6303.28	1598	13617.2	1598	11585.6
1599	9147.45	1599	8740.35	1599	17022	1599	15610.3	1599	7684.67	1599	5790.99	1599	13489.2	1599	11145.4
1600	10786.4	1600	8934.92	1600	15374.3	1600	12707.8	1600	9725.91	1600	7035.03	1600	11457.8	1600	10867.2
1601	9681.54	1601	5318.19	1601	17713.8	1601	15863	1601	10197.7	1601	8032.35	1601	11151.6	1601	11001.7
1602	10281.1	1602	7305.38	1602	18227.1	1602	16856.6	1602	9777.92	1602	7505.54	1602	12553.1	1602	14193.9
1603	7908.24	1603	6294.62	1603	17129.4	1603	15331.2	1603	9845.52	1603	7899.58	1603	12160.8	1603	13637.3
1604	8847.41	1604	8131.95	1604	16188.6	1604	14432.7	1604	10357.8	1604	7916.8	1604	12565.4	1604	14098.9
1605	9663.93	1605	8586.56	1605	17933.6	1605	15626.1	1605	10787.7	1605	8161.11	1605	12572	1605	12220.8
1606	9320.96	1606	7606.96	1606	19360.1	1606	16808.7	1606	10115.5	1606	7891.73	1606	11966.3	1606	10707
1607	7977.79	1607	8496.86	1607	16137.3	1607	13381.7	1607	9229.1	1607	6913.06	1607	13546.9	1607	9143.19
1608	9109.48	1608	10458.6	1608	15209.2	1608	12577.9	1608	8254.65	1608	6419.38	1608	15917.1	1608	12079.2
1609	8309.95	1609	10675.8	1609	13993	1609	10432.5	1609	9287.41	1609	7024.6	1609	15847.4	1609	14226.6
1610	9615.95	1610	10524.4	1610	14195	1610	11189.8	1610	9198.87	1610	7246.8	1610	15178.6	1610	13960.4
1611	10972.9	1611	11799.6	1611	12653.5	1611	10039.7	1611	9883.24	1611	7886.9	1611	17104.1	1611	15918.9
1612	11708.3	1612	10987.8	1612	13103.1	1612	10181.4	1612	8280.32	1612	6788.42	1612	14869.7	1612	14335.1
1613	10696.1	1613	10331.4	1613	9292.94	1613	7644.2	1613	7184.59	1613	5812.92	1613	14427.8	1613	12487
1614	10304.3	1614	7975.19	1614	12842.2	1614	9897.58	1614	6869.89	1614	5135.81	1614	12397.6	1614	9465.28
1615	11015.5	1615	7890.51	1615	13096	1615	9222.88	1615	7344.81	1615	5383.1	1615	10482.8	1615	7963.24
1616	10253.3	1616	7791.54	1616	13652.9	1616	10249	1616	8973.96	1616	6059.91	1616	10515.9	1616	7085.22
1617	9937.15	1617	9591.6	1617	14345.9	1617	11360.5	1617	10379.2	1617	7568.99	1617	10065.7	1617	5825.58
1618	9246.35	1618	10561.1	1618	14998.7	1618	11856.1	1618	10760.6	1618	8459.94	1618	10675	1618	5156.8
1619	10609	1619	10311	1619	15188	1619	11875.1	1619	10634.6	1619	8225.23	1619	11107.2	1619	6928.31
1620	10165.7	1620	11001.2	1620	16734.2	1620	14083.6	1620	10192.3	1620	8053.62	1620	12321.7	1620	8105
1621	9961.09	1621	10423.4	1621	14595.5	1621	11222	1621	10359.7	1621	8611.18	1621	12090.4	1621	8116.19
1622	10065.8	1622	8990.43	1622	15639.9	1622	12311.4	1622	10203.9	1622	8236.19	1622	12171.9	1622	8262.93
1623	9094.7	1623	9106.03	1623	13192.5	1623	9928.56	1623	8264.03	1623	7114.84	1623	10960	1623	7677.41
1624	9757.04	1624	9341.71	1624	12885.6	1624	11061.8	1624	8131.72	1624	6757.53	1624	12450.1	1624	8124.48
1625	12288.5	1625	12072.3	1625	14324.5	1625	11858.8	1625	7813.09	1625	6726.28	1625	12299.7	1625	8613.27
1626	10621.6	1626	9913.66	1626	12338	1626	11171.8	1626	7983.02	1626	6907.21	1626	12076.7	1626	8102
1627	13198.4	1627	12138	1627	9935.45	1627	8538.28	1627	8379.98	1627	7567.59	1627	13488.8	1627	8844.54
1628	12634.1	1628	11691.7	1628	9882.84	1628	8148.49	1628	8806.92	1628	8019	1628	15095.5	1628	10626.8
1629	13027.3	1629	11826.8	1629	12709.8	1629	10299.7	1629	7972.46	1629	7014.86	1629	15982.2	1629	13453
1630	12973.2	1630	11200.7	1630	10830.8	1630	7980.73	1630	8698	1630	7739.94	1630	14395.4	1630	13083.9
1631	12434.9	1631	12456	1631	12688.1	1631	8505.57	1631	9084.41	1631	8075.49	1631	13267.5	1631	11994.3
1632	14399.6	1632	14604.5	1632	15077.4	1632	12209.1	1632	8732.94	1632	6973.92	1632	13959.4	1632	14015.1
1633	16785.7	1633	15202.4	1633	17211.6	1633	15468.7	1633	9455.78	1633	8107.77	1633	14188.2	1633	11332.1
1634	17353.4	1634	16827.6	1634	19587.5	1634	17632.1	1634	8809.85	1634	7705.44	1634	16059.9	1634	11933.5
1635	17012.9	1635	16966	1635	19533	1635	16156.8	1635	9080.13	1635	7324.57	1635	19185.7	1635	14333.1
1636	15521.8	1636	14146.8	1636	18046.3	1636	13594.9	1636	7977.39	1636	6673.4	1636	14140.1	1636	9839.74
1637	13564.4	1637	15954.4	1637	19062.8	1637	13839.8	1637	7361.48	1637	5956.65	1637	19626.2	1637	16269.7
1638	12420.7	1638	12928.3	1638	21723	1638	15477.7	1638	6851.25	1638	5742.98	1638	16576.1	1638	14474.1
1639	12945.1	1639	12098.3	1639	25272.2	1639	19543.9	1639	7768.5	1639	6588.39	1639	17390.9	1639	16856.4
1640	11412.4	1640	11310.2	1640	25812.4	1640	21570.3	1640	5116.76	1640	4011.68	1640	13671.4	1640	14985
1641	10383.9	1641	10703.2	1641	24016.4	1641	22071.2	1641	5085.85	1641	3957.31	1641	10542.1	1641	11187
1642	10446.7	1642	9486.45	1642	22156.6	1642	19557.2	1642	4456.56	1642	3883	1642	8832.69	1642	9075.09
1643	8735.46	1643	6995.15	1643	20923.3	1643	19067.7	1643	4915.19	1643	4157.97	1643	7517.33	1643	6805.12
1644	7502.04	1644	4281.11	1644	20253.5	1644	18354	1644	5761.43	1644	4339.43	1644	8225.28	1644	7921.51
1645	5770.92	1645	3461.28	1645	21486.2	1645	20485.7	1645	6353.05	1645	4211.46	1645	7752.92	1645	7218.86
1646	3655.81	1646	1734.3	1646	20488.2	1646	18576.9	1646	6958.75	1646	4508.91	1646	6804.31	1646	5857.36
1647	4786.4	1647	2245.23	1647	18045.7	1647	15789.2	1647	7907.97	1647	5988.71	1647	7040.83	1647	6435.98
1648	4435.04	1648	2125.62	1648	15870.6	1648	14774.2	1648	7511.22	1648	6001.93	1648	9612.59	1648	11961.3
1649	5441.16	1649	4725.89	1649	16765.3	1649	13636.3	1649	6722.84	1649	4385.56	1649	9911.56	1649	12118.6
1650	8311.3	1650	11780.2	1650	15554.3	1650	13056.8	1650	7037.18	1650	4744.13	1650	10939	1650	12961.2
1651	9860.84	1651	12921.7	1651	16562.4	1651	14564.3	1651	6888.49	1651	4811.69	1651	11354.5	1651	12670.3
1652	9409.17	1652	11139.6	1652	15927.5	1652	13332.4	1652	9547.37	1652	6852.48	1652	13258.5	1652	14723.2
1653	11029.9	1653	9356.84	1653	15577.2	1653	11761.4	1653	7606.59	1653	5375.86	1653	13789.7	1653	15558.6
1654	9570.77	1654	7305.83	1654	15474.7	1654	10928.1	1654	10449.6	1654	8466.05	1654	14116.8	1654	15361.5
1655	7706.72	1655	6779.37	1655	17308.9	1655	12771.5	1655	10409	1655	8637.04	1655	15418.2	1655	14847.7
1656	9734.21	1656	7910.99	1656	15683.3	1656	10809.1	1656	12097.4	1656	10406	1656	17702.3	1656	15471
1657	9322.28	1657	8019.47	1657	15115.6	1657	11101.5	1657	12558	1657	10593.8	1657	19469	1657	17625.7
1658	9776.01	1658	8465.98	1658	17158.5	1658	12850.3	1658	13951.1	1658	11803.5	1658	20290	1658	19867.2
1659	9850.04	1659	9503.72	1659	18698.9	1659	14735.2	1659	15403.8	1659	13494.9	1659	18830.1	1659	16174.3
1660	9613.64	1660	9259.05	1660	20461.5	1660	15533.1	1660	15701.9	1660	12981.5	1660	20392.1	1660	17983.3
1661	9410.55	1661	9304.49	1661	21502	1661	20606.2	1661	15059.3	1661	13257.4	1661	23166.1	1661	22331.5
1662	9950.5	1662	10604.8	1662	16463	1662	19489.4	1662	14166.8	1662	12026.4	1662	22698.3	1662	24215.4
1663	8913.17	1663	9150	1663	10705	1663	13601.1	1663	13793.3	1663	11424.5	1663	19760	1663	20936.8
1664	8009.78	1664	7953.19	1664	7135.73	1664	8039.93	1664	12769.3	1664	11476.4	1664	22411	1664	24803.6
1665	8286.84	1665	6104.71	1665	8627.8	1665	7996.94	1665	12058	1665	11422	1665	24227.7	1665	23686.1
1666	9420.93	1666	6465.45	1666	6272.72	1666	6291.2	1666	10457.9	1666	9683.77	1666	28200.7	1666	25876.4
1667	12095.8	1667	8155.84	1667	9054.15	1667	9491.48	1667	10606.1	1667	9042.27	1667	31678.7	1667	27782.6
1668	14755.8	1668	10611.8	1668	6732.12	1668	7393.27	1668	11457.9	1668	9483.83	1668	39414.5	1668	32747.7
1669	16885.9	1669	13590.9	1669	7653.9	1669	7806.56	1669	10858.4	1669	9204.41	1669	40120.5	1669	33472
1670	15849.1	1670	15168.5	1670	8377.67	1670	6826.7	1670	11121.5	1670	9676.27	1670	39152.6	1670	34832.4
1671	13221.2	1671	13821.9	1671	8892.6	1671	5877.7	1671	10899.4	1671	9834.58	1671	36527.2	1671	35421.9
1672	10882.4	1672	11584.5	1672	10134.7	1672	8114.97	1672	10139.9	1672	8464.22	1672	34926.8	1672	35510.7
1673	13712.2	1673	14771.3	1673	11673	1673	11690.8	1673	9717.73	1673	7791.29	1673	34553.8	1673	37352.6
1674	13631.5	1674	14730.9	1674	10453.1	1674	9597.96	1674	8500.32	1674	6970.19	1674	33075.2	1674	34976.3
1675	14027.8	1675	13649.8	1675	11577	1675	11704.9	1675	8400.91	1675	6457.9	1675	36060	1675	40039.1
1676	15815.6	1676	16019.2	1676	14590.2	1676	12900.4	1676	9755.1	1676	7649.28	1676	35882.9	1676	37581.2
1677	14735.6	1677	14867.6	1677	15526.5	1677	12498.1	1677	8626.41	1677	7019.11	1677	35971.5	1677	39247.9
1678	14122	1678	12793.9	1678	19719.5	1678	15834.1	1678	9151.53	1678	7767	1678	35083.2	1678	37252.3
1679	12560.3	1679	13928.8	1679	20695.9	1679	16534.4	1679	7508.68	1679	7429.02	1679	34689.1	1679	37634.9
1680	12531.4	1680	13865.7	1680	18980.2	1680	14632.9	1680	8741.61	1680	8031.4	1680	31968.6	1680	32591
1681	11992	1681	13097.5	1681	23816.3	1681	17753.5	1681	10749.2	1681	10413.1	1681	31306.3	1681	27682.8
1682	12605.9	1682	13385.5	1682	20090.4	1682	13808.4	1682	13381.9	1682	11556.5	1682	31969.6	1682	28727
1683	12167	1683	11863.2	1683	17300.7	1683	10927.2	1683	13811.9	1683	10908.3	1683	33562.6	1683	30725.9
1684	12144.3	1684	10185.6	1684	17795.3	1684	12031	1684	12713.7	1684	10069.1	1684	32636.8	1684	32635
1685	13124.7	1685	11024.5	1685	20402.9	1685	12032	1685	12770	1685	11284.1	1685	25938.2	1685	27631.5
1686	13808.5	1686	11383.8	1686	22882.2	1686	14235.9	1686	12817.4	1686	11155	1686	21295.3	1686	23752
1687	13558	1687	11988.7	1687	26154.2	1687	16435	1687	10954.9	1687	8633.98	1687	21858.8	1687	24253.1
1688	12680.7	1688	10048.6	1688	33131.2	1688	24603.1	1688	10078.5	1688	7984.76	1688	22083.4	1688	23037.5
1689	10467.3	1689	9979.59	1689	28484	1689	18447.3	1689	9169.39	1689	7826.61	1689	21644.7	1689	20666.7
1690	10107.2	1690	10418.2	1690	40081.3	1690	31468.8	1690	8558.33	1690	7483.23	1690	19765.3	1690	19604.9
1691	10884.4	1691	10556.3	1691	37053.7	1691	36240.2	1691	6990.23	1691	6148.71	1691	19688.6	1691	20235.3
1692	11349.8	1692	11260.5	1692	35259.6	1692	37119.9	1692	6633.38	1692	4786.33	1692	19266.2	1692	23002.2
1693	12762	1693	12775.7	1693	30569.8	1693	34889.5	1693	6645.18	1693	5728.92	1693	21265.7	1693	23962.8
1694	12006.8	1694	12594.1	1694	24425.3	1694	28811.2	1694	6629.23	1694	4646.17	1694	25098	1694	26524.8
1695	11100.5	1695	10117.8	1695	22999.9	1695	26565.6	1695	7124.28	1695	5100.61	1695	22908.5	1695	24176.9
1696	11595.1	1696	10740.6	1696	22714.2	1696	26898.7	1696	8816.5	1696	5880.32	1696	23590.3	1696	24679.7
1697	11230.7	1697	11213.7	1697	24666.8	1697	29129.9	1697	10199.5	1697	7259.18	1697	22149.5	1697	22936.8
1698	12364.2	1698	11781.4	1698	23701.4	1698	26740.6	1698	10594.5	1698	7922.1	1698	22085.8	1698	21590.7
1699	12558.4	1699	11889.3	1699	28673	1699	30586.3	1699	11898.4	1699	9190.98	1699	22936	1699	23037
1700	12261.6	1700	10780	1700	30953.6	1700	29455.1	1700	13654.4	1700	11641	1700	23704.7	1700	23809.2
1701	12444.3	1701	10235.2	1701	28366.8	1701	29250.5	1701	12365.2	1701	11028.2	1701	22743.6	1701	21747.5
1702	12853.5	1702	10165.2	1702	28292.2	1702	24838.9	1702	9746.56	1702	9740.87	1702	21262.4	1702	20914.4
1703	13861.7	1703	12727.1	1703	27726	1703	21183.9	1703	7649.07	1703	7336.91	1703	20072.8	1703	21014.6
1704	13738.1	1704	13220.2	1704	28173.1	1704	24308.7	1704	5512.61	1704	5007.92	1704	19716.8	1704	20379.7
1705	14614	1705	13935.5	1705	25704.4	1705	21648.8	1705	6537.46	1705	6179.48	1705	19876.2	1705	20202.1
1706	15457.8	1706	16133.1	1706	24192.2	1706	20504.2	1706	4118.52	1706	4112.6	1706	18262.1	1706	18600.3
1707	15458.9	1707	17137	1707	24823.4	1707	21924.4	1707	4335.6	1707	4531.57	1707	16938.5	1707	18635.4
1708	15856.3	1708	16008.3	1708	23670.8	1708	21579.8	1708	4744	1708	5293.02	1708	14313	1708	17241.9
1709	16693.9	1709	14652.3	1709	22863.5	1709	20826.5	1709	6042.84	1709	6210.08	1709	13169.5	1709	15384.6
1710	17702.2	1710	17309	1710	22957	1710	21834.5	1710	5740.53	1710	5655.86	1710	13681.5	1710	15294.5
1711	20006.3	1711	18917.6	1711	24091.7	1711	22629	1711	5454.24	1711	5124.4	1711	14019.1	1711	15490.2
1712	18384.7	1712	20439.5	1712	26209.8	1712	26058.9	1712	6462.88	1712	6042.98	1712	13621	1712	13681.5
1713	18472.3	1713	18868.2	1713	27959.9	1713	26548.8	1713	7908.74	1713	7324.52	1713	15550.6	1713	12978.7
1714	18200.4	1714	15827.7	1714	25676.2	1714	25598.2	1714	8857.81	1714	8535.64	1714	14773.6	1714	14577
1715	16740.7	1715	14829.7	1715	29585.3	1715	28406.1	1715	10400.6	1715	10516.5	1715	13475.8	1715	12355
1716	17430.7	1716	13148.5	1716	28810.9	1716	23394.6	1716	10733.9	1716	10743.7	1716	13928.4	1716	12455.6
1717	18737.4	1717	13182.6	1717	28006.5	1717	23100.3	1717	11726.4	1717	11374.1	1717	14470.2	1717	13230.6
1718	17335.6	1718	12509.6	1718	21308.6	1718	16457.4	1718	12642.8	1718	11515.4	1718	14935.1	1718	13058.8
1719	14588.1	1719	11182.7	1719	20023.8	1719	15410.9	1719	13180.3	1719	11106.6	1719	16147.1	1719	15355.5
1720	12691.3	1720	9155.35	1720	19150.1	1720	13928.5	1720	13666.1	1720	11076.7	1720	15736.5	1720	14896
1721	11045.4	1721	8913.21	1721	21424.6	1721	15455.9	1721	12450.2	1721	11578.3	1721	15748.5	1721	15012.4
1722	9854.6	1722	8240.17	1722	20744.2	1722	14969	1722	12126.5	1722	10952.5	1722	12949.7	1722	12410.5
1723	9811.5	1723	7478.79	1723	22368	1723	15873.1	1723	12257.8	1723	10868.2	1723	10826.8	1723	11987.1
1724	9878.91	1724	6461.37	1724	23552.7	1724	16921.6	1724	13425.3	1724	11447.8	1724	9974.21	1724	11007.1
1725	9238.1	1725	5731.68	1725	23442.9	1725	18035.2	1725	14091.2	1725	11592.9	1725	9780.95	1725	10101.1
1726	8366.94	1726	6207.72	1726	25122.3	1726	19399.9	1726	14338	1726	12811.2	1726	11579	1726	11440.4
1727	8419.17	1727	5268.6	1727	25023.6	1727	21262.9	1727	13468.1	1727	11123.5	1727	13231.3	1727	12411.2
1728	6434.79	1728	4831.8	1728	23793.9	1728	21184.4	1728	12153.7	1728	10339.6	1728	13570.6	1728	13763.8
1729	5502.25	1729	6409.86	1729	23539.9	1729	19581.6	1729	11231.9	1729	9020.23	1729	12797.3	1729	13824.6
1730	7042.27	1730	7590.94	1730	24833.4	1730	20875.3	1730	10571.9	1730	8587.7	1730	12643.8	1730	12753.4
1731	8456.52	1731	9524.29	1731	26310	1731	23668.4	1731	11070.3	1731	9123.07	1731	11600.8	1731	12114.3
1732	8906.92	1732	11191.1	1732	28842.8	1732	27673.6	1732	12983.7	1732	11583.4	1732	10136.2	1732	12355.2
1733	10796	1733	14281.2	1733	31775.5	1733	31268.1	1733	12790.2	1733	11285.8	1733	11141.8	1733	13637.5
1734	11761.3	1734	14948.4	1734	32473.2	1734	31609	1734	12574.7	1734	11421.5	1734	12969.7	1734	14409.1
1735	11741.2	1735	15287.9	1735	31752.5	1735	29813.9	1735	13734.2	1735	11304.7	1735	14265	1735	13841.4
1736	13196.4	1736	16148.2	1736	29545.9	1736	27484.5	1736	14291.8	1736	11767.5	1736	14468.6	1736	13971.7
1737	14595.2	1737	13899.8	1737	28459.3	1737	24487.5	1737	13381.3	1737	10580.8	1737	13952.6	1737	14313.8
1738	14982.7	1738	13213.7	1738	28017.7	1738	21272.1	1738	11102.2	1738	8003.03	1738	12854.9	1738	15219.8
1739	13214.2	1739	9846.79	1739	25052.3	1739	17595.4	1739	10529.2	1739	7683.1	1739	12160	1739	14872.4
1740	11120.7	1740	9273.44	1740	25919.3	1740	21185.3	1740	9213.21	1740	6345.45	1740	11369.5	1740	13338.3
1741	10089.7	1741	7034.11	1741	25705.3	1741	20648	1741	9283	1741	6690.9	1741	10171.8	1741	12509.6
1742	11036.9	1742	9572.81	1742	25249.4	1742	20629.9	1742	8693.11	1742	6586.16	1742	10127.9	1742	12852.9
1743	10902.3	1743	9575.28	1743	22297.4	1743	18305.3	1743	8350.88	1743	6938.39	1743	11198.3	1743	13437.5
1744	11603.6	1744	9200.34	1744	20168.8	1744	16969.5	1744	8677.9	1744	8553.19	1744	11343.4	1744	12035.9
1745	12192	1745	9512.53	1745	20554.5	1745	17459.3	1745	9598.79	1745	10205.1	1745	10810.6	1745	11562.7
1746	11624	1746	8982.35	1746	15404.2	1746	11597.4	1746	11174.4	1746	13610.5	1746	9678.04	1746	10841.3
1747	12621.2	1747	8652.65	1747	12528.9	1747	9362.6	1747	11240.5	1747	13356.9	1747	9078.88	1747	9310.6
1748	11903.4	1748	8149.23	1748	10559.5	1748	9247.86	1748	12659.1	1748	13829.2	1748	10167.8	1748	10530.2
1749	11804	1749	9734.37	1749	9558.21	1749	8827.78	1749	13878.3	1749	13641.8	1749	8353.35	1749	9176.62
1750	12623.8	1750	12067.2	1750	14441.6	1750	11266.5	1750	15093.4	1750	14373.8	1750	7194.71	1750	8020.07
1751	14678	1751	14904.8	1751	11957.1	1751	8594.57	1751	15236.9	1751	14454.9	1751	7892.45	1751	8925.23
1752	15234.2	1752	15258.4	1752	12831.2	1752	10201.8	1752	13655.2	1752	12817.8	1752	12170.4	1752	14837.4
1753	15202.3	1753	12750.8	1753	11072.3	1753	8901.43	1753	11268.3	1753	9734.54	1753	12776.1	1753	14817.9
1754	15092.6	1754	13000.6	1754	10868.7	1754	8136.62	1754	14077.2	1754	12292.1	1754	12108.3	1754	12447.3
1755	13501.5	1755	10630.9	1755	10223.8	1755	7260.9	1755	15886.6	1755	14577.6	1755	12271.1	1755	13725.4
1756	14661.2	1756	11254.6	1756	10112.5	1756	8230.73	1756	13706	1756	11708.1	1756	11539.6	1756	11341.1
1757	17586.1	1757	13631.1	1757	10929	1757	10348.9	1757	16736.2	1757	13134.2	1757	10385.4	1757	10157
1758	20078.3	1758	15015.6	1758	17855.5	1758	16369.5	1758	17518.3	1758	13604.2	1758	7815.53	1758	7602.67
1759	22378.4	1759	16909.1	1759	13677.3	1759	12766.5	1759	19467	1759	15277.5	1759	8416.19	1759	8056.79
1760	23401.2	1760	20797.5	1760	11757.8	1760	10335.6	1760	20161	1760	16868.9	1760	7869.5	1760	8829.55
1761	24918.6	1761	24088.7	1761	10701.7	1761	9419.59	1761	18562.7	1761	15030.2	1761	8272.34	1761	7954.83
1762	25415	1762	23916.4	1762	9919.67	1762	8221.44	1762	24704.6	1762	21781.9	1762	9351.55	1762	8079.45
1763	25128.2	1763	21885.5	1763	10496.4	1763	8536.42	1763	19553.2	1763	16243.4	1763	10611.8	1763	8233.59
1764	23708.8	1764	20329.6	1764	10987.6	1764	9781.66	1764	19761.4	1764	17270.7	1764	9201.45	1764	8001.21
1765	19434.2	1765	17213.2	1765	10934.2	1765	9962.18	1765	24019.9	1765	20973.5	1765	7604.79	1765	6558.01
1766	16471.3	1766	14457.5	1766	11210.6	1766	11733.5	1766	18039.4	1766	15098.2	1766	6759.8	1766	7424.86
1767	14021.5	1767	12214	1767	11530.4	1767	13200.1	1767	18735.8	1767	16224.7	1767	5902.32	1767	4725.93
1768	13522.2	1768	11319	1768	11825.6	1768	13080.6	1768	21424.8	1768	18953.3	1768	6252.1	1768	3938.18
1769	12791.6	1769	9696.61	1769	11508.6	1769	11556.5	1769	21050.4	1769	17116.8	1769	6072.64	1769	5432.34
1770	13511.7	1770	9896.57	1770	10674.9	1770	9928.49	1770	17195.7	1770	14098.8	1770	6428.36	1770	5579.73
1771	13463	1771	13764.3	1771	9461.06	1771	8357.59	1771	15743.8	1771	12682.6	1771	9492.54	1771	5861.88
1772	13347.3	1772	13164.2	1772	7922.91	1772	6656.26	1772	23605	1772	18403.7	1772	11417.7	1772	9384.92
1773	13025.3	1773	12728.8	1773	7754.55	1773	6627.04	1773	27933.2	1773	23066.1	1773	12114.6	1773	11943.9
1774	13524.5	1774	13952.3	1774	5385.05	1774	3624.02	1774	26739.5	1774	23348.8	1774	12858.8	1774	13104.8
1775	14103.7	1775	14053.4	1775	4897.25	1775	3389.41	1775	30444.3	1775	26573.2	1775	14324.7	1775	13620.3
1776	16490.1	1776	18171.5	1776	3793.64	1776	2727.42	1776	32097.5	1776	27782.1	1776	14223.4	1776	15254.7
1777	17030.2	1777	17722.9	1777	2898.88	1777	2396.05	1777	33385.3	1777	28158.9	1777	13174.4	1777	12587.6
1778	15509.3	1778	14545.5	1778	4096.59	1778	3569.12	1778	32594.7	1778	27278.8	1778	14647.7	1778	15518.6
1779	13214.8	1779	12310.1	1779	3686.51	1779	3176.07	1779	30263.7	1779	25401.4	1779	10221	1779	8960.4
1780	10177.7	1780	8067.76	1780	4704.27	1780	5581.64	1780	27910.2	1780	24894	1780	14499.1	1780	12454.4
1781	8804.89	1781	7054.43	1781	4009.23	1781	3784.77	1781	26665.9	1781	22777.4	1781	13079.2	1781	10329.2
1782	7659.44	1782	6418.57	1782	4936.32	1782	7022.78	1782	22024.5	1782	18345.4	1782	13986.2	1782	12558.4
1783	7338.79	1783	5796.37	1783	7039.86	1783	9461.75	1783	18676.7	1783	14532.2	1783	13423.7	1783	13287.3
1784	6177.01	1784	5338.25	1784	6268.16	1784	7982.16	1784	16697.8	1784	12581	1784	13001.4	1784	11986
1785	7004.45	1785	6334.02	1785	6516.28	1785	7579.03	1785	14933.6	1785	11987.4	1785	11112	1785	10659.8
1786	10136.5	1786	8490.97	1786	7574.83	1786	9477.59	1786	13983.2	1786	11566.5	1786	8877.07	1786	8632.02
1787	9518.93	1787	8454.73	1787	6422.28	1787	7758.86	1787	12472.1	1787	10034.2	1787	8302.99	1787	7539.68
1788	10150.5	1788	8504.74	1788	6207.02	1788	7777.96	1788	12995.4	1788	10736.7	1788	6396.73	1788	5133.45
1789	14611.2	1789	13236.1	1789	6228.82	1789	7586.99	1789	14370.8	1789	12885.1	1789	5372.94	1789	4206.81
1790	15171.4	1790	13811.5	1790	6034.32	1790	7520.14	1790	15731.7	1790	15529.7	1790	2897.25	1790	4476.85
1791	12661	1791	11089.7	1791	6918.95	1791	8333.11	1791	16403.6	1791	17046	1791	3396.23	1791	5924.98
1792	9835.42	1792	9621.13	1792	8013.72	1792	8992.64	1792	15683.1	1792	15910.3	1792	4570.97	1792	7873.02
1793	9386.66	1793	11062	1793	8321.84	1793	8249.58	1793	14178.5	1793	14145	1793	7408.84	1793	10290.5
1794	10312.3	1794	12103.2	1794	8153.6	1794	8650.9	1794	14864.8	1794	14707.2	1794	8680.64	1794	10874.8
1795	10074.9	1795	10579.8	1795	9056.78	1795	8837.83	1795	13548.1	1795	13152.8	1795	9126.79	1795	9490.8
1796	7429.61	1796	6106.47	1796	10821.1	1796	10062.9	1796	13064.5	1796	13120.1	1796	8084.71	1796	10172.3
1797	5484.56	1797	5807.1	1797	9806.98	1797	9476.41	1797	12668.5	1797	11881.1	1797	9823.21	1797	13347.2
1798	3444.77	1798	3828.76	1798	10973.6	1798	9882.11	1798	14743	1798	14170.3	1798	11488.9	1798	15919.5
1799	2769.31	1799	3318.55	1799	11444.2	1799	10183.7	1799	12566.6	1799	11758.8	1799	10576.7	1799	15638.7
1800	2036.18	1800	2621.2	1800	13314.5	1800	11631.1	1800	11825.4	1800	12011.2	1800	11335.9	1800	16542.9
1801	5128.88	1801	5295.34	1801	11788.1	1801	10404.8	1801	12585.3	1801	12614.6	1801	11727.7	1801	16976.5
1802	7003.65	1802	6719.13	1802	11170.9	1802	10039.7	1802	11978.6	1802	11605.5	1802	12062.8	1802	15430
1803	6247.48	1803	6268.21	1803	10401.8	1803	9448.66	1803	11703.1	1803	10459.9	1803	10436.5	1803	12891.1
1804	8706.67	1804	8895.7	1804	9981.74	1804	8365.16	1804	12037.8	1804	11107.7	1804	11020.2	1804	12197.2
1805	10356.9	1805	10694.4	1805	9250.77	1805	7791.51	1805	12603.2	1805	10448	1805	8382.88	1805	10191.3
1806	9543.53	1806	9291.81	1806	10844.7	1806	8019.58	1806	12251.2	1806	9752.37	1806	11245.1	1806	13659.7
1807	8446.43	1807	8185.33	1807	9353.1	1807	8188.23	1807	11708.6	1807	9528.24	1807	11827.3	1807	11950.6
1808	7657.8	1808	7643.82	1808	8148.39	1808	7426.13	1808	11069.1	1808	8834.47	1808	9810.83	1808	10821.2
1809	6559.19	1809	7063.83	1809	8570.69	1809	8100.85	1809	9297.56	1809	7278.9	1809	9385.78	1809	10441.1
1810	8436	1810	9063.82	1810	9486.75	1810	8669.05	1810	7931.4	1810	6777.92	1810	7329.16	1810	6565.15
1811	6901.84	1811	8037.56	1811	10530.4	1811	10145.5	1811	8783.6	1811	7411.6	1811	8593.28	1811	9529.76
1812	6998.64	1812	9334.33	1812	14077.5	1812	13957.2	1812	7981.75	1812	6358.91	1812	8576.68	1812	8793.73
1813	6161.12	1813	8477.9	1813	16899.1	1813	17092.5	1813	6188.14	1813	5866.51	1813	10783.5	1813	11228.7
1814	7509.03	1814	9236.56	1814	16995.2	1814	15750	1814	4015.28	1814	4339.66	1814	8294.73	1814	7749.74
1815	7197.07	1815	7987.47	1815	18098.9	1815	15839.6	1815	3828.57	1815	3232.86	1815	9387.52	1815	9411.99
1816	8929.61	1816	9378.15	1816	19536.9	1816	17931.8	1816	4399.31	1816	3491.39	1816	10045.5	1816	8784.92
1817	8779.88	1817	8083.01	1817	18906.6	1817	18360.8	1817	5252.26	1817	4537.31	1817	9201.38	1817	6398.15
1818	10585.3	1818	9116.38	1818	19799.5	1818	21042.2	1818	5412.45	1818	5504.41	1818	7238.55	1818	6553.05
1819	10581.9	1819	9342.26	1819	20884.3	1819	19790.9	1819	6072.53	1819	6204.63	1819	9249.28	1819	6769.33
1820	13063.2	1820	14129.5	1820	19872.4	1820	18234.7	1820	6410.47	1820	6507.83	1820	9453.8	1820	6474.26
1821	10880.5	1821	9862.52	1821	17820.3	1821	14954.3	1821	6333.1	1821	5938.79	1821	9573.75	1821	6701.66
1822	12729.2	1822	13248.1	1822	15309.4	1822	12753.3	1822	10054	1822	8784.91	1822	10459.6	1822	7294.33
1823	14261	1823	14708.2	1823	14906	1823	12401.8	1823	8151.17	1823	7497.53	1823	11140.7	1823	8760.5
1824	14795.4	1824	15497.6	1824	13463.2	1824	10491.4	1824	8524.69	1824	8206.53	1824	12223.6	1824	12543.8
1825	15623.1	1825	14429.4	1825	11740.4	1825	9222.53	1825	9137.54	1825	10116.6	1825	12359.2	1825	12236.6
1826	15836.5	1826	14564.4	1826	10695	1826	9371.44	1826	8854.46	1826	9023.5	1826	12243.8	1826	12922.6
1827	17023.4	1827	14707.4	1827	10152.8	1827	9641.87	1827	5939.2	1827	6935.17	1827	13179.4	1827	14433.5
1828	17252.2	1828	14518.2	1828	9952.24	1828	9836.68	1828	7177.41	1828	8767.96	1828	9717.44	1828	9416.65
1829	18146.1	1829	17496.2	1829	10776.6	1829	10850.3	1829	5231.41	1829	6813.92	1829	10682.4	1829	11093.2
1830	18074.1	1830	20272.9	1830	12025	1830	12137.2	1830	8549.37	1830	9243.11	1830	12222.9	1830	12624.9
1831	22044.1	1831	27859.3	1831	13144.4	1831	12196.9	1831	8057.23	1831	8092.58	1831	15094.4	1831	14807.1
1832	24147.4	1832	27942.8	1832	13232.5	1832	10563.5	1832	9905.06	1832	8911.61	1832	14385	1832	17051.1
1833	21772.4	1833	27062.9	1833	12577.4	1833	12189.7	1833	10830	1833	9229.62	1833	10751.5	1833	10968.5
1834	23002.9	1834	25696.9	1834	10639.9	1834	9031	1834	14722.7	1834	10893.8	1834	11152.9	1834	11589.2
1835	20841.6	1835	20864.5	1835	10149.8	1835	8286.43	1835	20144.9	1835	16292.6	1835	14133.5	1835	14197.3
1836	17408	1836	16532.5	1836	9894.58	1836	7657.15	1836	22387.2	1836	19984	1836	16208.1	1836	17582
1837	13724.2	1837	11240.4	1837	10577.2	1837	8245.34	1837	22380.1	1837	18488.9	1837	16780	1837	18351
1838	11539.2	1838	11574.2	1838	10078.4	1838	8733.81	1838	15623.7	1838	11821.7	1838	17524.4	1838	17256.1
1839	11304	1839	12673.9	1839	10726.8	1839	8495.17	1839	12902.8	1839	10064.4	1839	19031.8	1839	17707.4
1840	9979.49	1840	12670.6	1840	14681.1	1840	12852.1	1840	15025.6	1840	11923.2	1840	20419.7	1840	19354.6
1841	9935.93	1841	12021.3	1841	14662.8	1841	13478.3	1841	16982.9	1841	14183.5	1841	18197	1841	16080.7
1842	9815.9	1842	10463.2	1842	16894.2	1842	16344.5	1842	15781.3	1842	11596.2	1842	15923.4	1842	14329.1
1843	10458.9	1843	11027.1	1843	18014.5	1843	16163.5	1843	12240.8	1843	9648.86	1843	16398.3	1843	15954.1
1844	10383.6	1844	12296.7	1844	16044.2	1844	14677.7	1844	10633.7	1844	8524.85	1844	14115.1	1844	13907.8
1845	11162.2	1845	13577.7	1845	13773.1	1845	13468.8	1845	10189	1845	7949.75	1845	10609	1845	9970.36
1846	16120.5	1846	18629.9	1846	12391.6	1846	12414	1846	11506.1	1846	8818.64	1846	14537	1846	14203.9
1847	12889.8	1847	15624.4	1847	12479	1847	11361.2	1847	12556.6	1847	11477.7	1847	11080.7	1847	11376
1848	11733.3	1848	11387.8	1848	12596.7	1848	10559.9	1848	13236.9	1848	10766.3	1848	11234.7	1848	12502.3
1849	13516.3	1849	16016.3	1849	13739.5	1849	10826.6	1849	16593	1849	12987.9	1849	11068.2	1849	11174
1850	19469.8	1850	21257.9	1850	15091.9	1850	11242.2	1850	18060.3	1850	15563.3	1850	10522.8	1850	9826.8
1851	19513.6	1851	19715.7	1851	16543.9	1851	12873.8	1851	16787.2	1851	13437.2	1851	10868.8	1851	11424
1852	19701.1	1852	18978.3	1852	17981.5	1852	13981.5	1852	17016.5	1852	12730.9	1852	10209.3	1852	12411
1853	18782.1	1853	16704.9	1853	17366.2	1853	14815.2	1853	19471.9	1853	15240.3	1853	12379.2	1853	12767.4
1854	16943.8	1854	14931.6	1854	19523	1854	16689.3	1854	18612.9	1854	15106.4	1854	10262.9	1854	9705.43
1855	12976	1855	13170.7	1855	20814.9	1855	20242.8	1855	16979.5	1855	12534.5	1855	12452.9	1855	10287.9
1856	9734.67	1856	9696.32	1856	22606.2	1856	22104.3	1856	20818.9	1856	17079	1856	11501.6	1856	10211.3
1857	8961.11	1857	8715.76	1857	23553.4	1857	23679.5	1857	19026.8	1857	15442.6	1857	14502	1857	13780.8
1858	7396.57	1858	8276.52	1858	21294.5	1858	19919.3	1858	19262.4	1858	16620.4	1858	11917.7	1858	9597.66
1859	9653.08	1859	9993.06	1859	18817.3	1859	18013.5	1859	17745.7	1859	15357.1	1859	13921.8	1859	11025.2
1860	10375.9	1860	11138.1	1860	22740.9	1860	21807.4	1860	19205.9	1860	17539.3	1860	13444	1860	12153.6
1861	12005.6	1861	11546.7	1861	20751.2	1861	20052.8	1861	17269	1861	15023.9	1861	13634.6	1861	10543.9
1862	15577.6	1862	12369.3	1862	17911.4	1862	17387.1	1862	16160.7	1862	14601.8	1862	13657.8	1862	10765.6
1863	17976.8	1863	13665.5	1863	20210.7	1863	19028.1	1863	14775.4	1863	13544.8	1863	12829.3	1863	9830.33
1864	18560.3	1864	12560.2	1864	26349.4	1864	25495.1	1864	12731.8	1864	12509.3	1864	15098.3	1864	10832
1865	17920.6	1865	13106.3	1865	29202.9	1865	26047.2	1865	11810	1865	11393.2	1865	13929.4	1865	9495.04
1866	15321.4	1866	14148.4	1866	24066.6	1866	22963.1	1866	11096.5	1866	9242.8	1866	13674.1	1866	10555.2
1867	13325.9	1867	13879.9	1867	26802.2	1867	23394.5	1867	9646.55	1867	7508.31	1867	14191.2	1867	13750.3
1868	12401.8	1868	12111.7	1868	20814.9	1868	18787.4	1868	9924.04	1868	7252.48	1868	13636.4	1868	12831.5
1869	11240.5	1869	11787.3	1869	15180.4	1869	13876.4	1869	11697.3	1869	9172.64	1869	12723.6	1869	13324.6
1870	10875	1870	11878.8	1870	14589	1870	12381.3	1870	13766.3	1870	11551.7	1870	12126.8	1870	13369.3
1871	12010.9	1871	11057.5	1871	14746.1	1871	12023.9	1871	13827.4	1871	12919.6	1871	13017.9	1871	13412.4
1872	12411.7	1872	11233.4	1872	14429	1872	12891.4	1872	14769.9	1872	13607.8	1872	13286.1	1872	15721.5
1873	12963.3	1873	11816.9	1873	14684.5	1873	12285.8	1873	18297.3	1873	15387.9	1873	12484.8	1873	13773.9
1874	13551.5	1874	13896.8	1874	14154	1874	13061.5	1874	18027.7	1874	15007.2	1874	13266.6	1874	16269.7
1875	13600.5	1875	14834.9	1875	14286.7	1875	12946.1	1875	18034.7	1875	15163.7	1875	13353.8	1875	16535
1876	13766.6	1876	14661.6	1876	14371.4	1876	12860.4	1876	19299.1	1876	16115.4	1876	12856	1876	15605.4
1877	13473.9	1877	13321.9	1877	14727.8	1877	13191.4	1877	20271.7	1877	17007.5	1877	16287.7	1877	19611.8
1878	14949.8	1878	15298.8	1878	14562.1	1878	12544.5	1878	19168.1	1878	16573.9	1878	17273	1878	17879.7
1879	15903.1	1879	15090.4	1879	14429	1879	12735.6	1879	15160.5	1879	12624.5	1879	19437	1879	17942.9
1880	13892.8	1880	15878.6	1880	14558	1880	13528.3	1880	13334.6	1880	11427.8	1880	18539	1880	19017
1881	14088.3	1881	14093.9	1881	11140.5	1881	11072.1	1881	14554.4	1881	12976.9	1881	18677.6	1881	18921.8
1882	14710.4	1882	16094.5	1882	9053.79	1882	7881.06	1882	13077.7	1882	11468.7	1882	18341.4	1882	17193.4
1883	14753	1883	14780.9	1883	9142.37	1883	6309.72	1883	13982.8	1883	11340.1	1883	16095.8	1883	15754.5
1884	14694	1884	14133.5	1884	9841.79	1884	7364.42	1884	13396.9	1884	10210	1884	18124.5	1884	16983.2
1885	14743.8	1885	14751.3	1885	10615.4	1885	7764.01	1885	11873.6	1885	8669.34	1885	19327.2	1885	17649.9
1886	14381.3	1886	12603.7	1886	12056	1886	8985.4	1886	8753.33	1886	6503.66	1886	16620	1886	15124.3
1887	13378	1887	13524.1	1887	11752.7	1887	9379.6	1887	7963.13	1887	5903.3	1887	16462.4	1887	15621.7
1888	14807.5	1888	13170.9	1888	11461.1	1888	8793.09	1888	6473.33	1888	4493.79	1888	15813.9	1888	15518.5
1889	12773.7	1889	10268.7	1889	12229.3	1889	9468.95	1889	5030.1	1889	3783.04	1889	16418.3	1889	16062.9
1890	13156.9	1890	11059.5	1890	14226.8	1890	10902.7	1890	4347.19	1890	3444.23	1890	17986.5	1890	15219.7
1891	10618	1891	11258.5	1891	11817.3	1891	10440.2	1891	3919.33	1891	3904.05	1891	17470.8	1891	13294.6
1892	11756.1	1892	13061.2	1892	12270.5	1892	10535.4	1892	6873.2	1892	5639.57	1892	18352.6	1892	14163.7
1893	13144.8	1893	13883.1	1893	13474.6	1893	10938.7	1893	4356.32	1893	3989.37	1893	17828.1	1893	15942.2
1894	18745.4	1894	16408.7	1894	13755.9	1894	11033.6	1894	6952.37	1894	5662.15	1894	17343.8	1894	16197.4
1895	19208.3	1895	16609.4	1895	12551.1	1895	9706.95	1895	8965.32	1895	7360.35	1895	15397.7	1895	15236.7
1896	19526	1896	15402	1896	16207.5	1896	13080.8	1896	10550.7	1896	9215.51	1896	14965	1896	13782.9
1897	20373.3	1897	16995.2	1897	13676.5	1897	10829.5	1897	12936.2	1897	11023.8	1897	14196.3	1897	12732.2
1898	19527.4	1898	15402.2	1898	13333.7	1898	9511.75	1898	17643.2	1898	14905.6	1898	13260.4	1898	12131.2
1899	18874.6	1899	15070.8	1899	13533.1	1899	9852.07	1899	20540	1899	17342.9	1899	12574.8	1899	11606.6
1900	18569.8	1900	14840.9	1900	13543.2	1900	10349	1900	19530.6	1900	15426.4	1900	12010.9	1900	10608.2
1901	18536	1901	13479.9	1901	14141	1901	11601.3	1901	18317.5	1901	13988.2	1901	12112.9	1901	10783.1
1902	18477.7	1902	13989.3	1902	14639.1	1902	12777.5	1902	17608.4	1902	13413.2	1902	10540.7	1902	9399.43
1903	18852.5	1903	13377.3	1903	16512.2	1903	13221.2	1903	16726	1903	12963.9	1903	9247.81	1903	9281.57
1904	19919.2	1904	16409.4	1904	17106.2	1904	14716.3	1904	16073	1904	12460.6	1904	9722.57	1904	8936.88
1905	18783	1905	13998.5	1905	17160.1	1905	14946.7	1905	14869	1905	13311.1	1905	9749.89	1905	9076.67
1906	20039.3	1906	16389.7	1906	16438	1906	13118.3	1906	13440.7	1906	12065	1906	9452.44	1906	9036.21
1907	20706	1907	16610.1	1907	17559.3	1907	13489.6	1907	12579.4	1907	11608.3	1907	9069.85	1907	8477.18
1908	20705.9	1908	15380.1	1908	17264.5	1908	13982.5	1908	9537.75	1908	7987.99	1908	8412.14	1908	6783.38
1909	18040	1909	14893.7	1909	17697.7	1909	14026.7	1909	8342.66	1909	8366.58	1909	8885.84	1909	5962.83
1910	18005.7	1910	14748.9	1910	18295.5	1910	14515.5	1910	7902.36	1910	7615.73	1910	8572.99	1910	6382.33
1911	18272.5	1911	15661.9	1911	17382.8	1911	14600.2	1911	9428.63	1911	9089.21	1911	9145.76	1911	6282
1912	18199.6	1912	14307.9	1912	16195.2	1912	12286.4	1912	10561.6	1912	10276.4	1912	8448.04	1912	5855.36
1913	18291.4	1913	15712.9	1913	14925.8	1913	11235.4	1913	10073.8	1913	9634.46	1913	8770.76	1913	6291.47
1914	19035.2	1914	16091.9	1914	14485.6	1914	11477.4	1914	10778.2	1914	9832.36	1914	8880.04	1914	7389.59
1915	17938.8	1915	16044.9	1915	14966.3	1915	11188.4	1915	8624.58	1915	7360.57	1915	9491.29	1915	8965.29
1916	15726.7	1916	13776.3	1916	15197.3	1916	11185.5	1916	8656.41	1916	7866.39	1916	10710.8	1916	9687.05
1917	14426	1917	12269	1917	15053.6	1917	11681.6	1917	8578.17	1917	7955.69	1917	11526.5	1917	9866.71
1918	14295.1	1918	12027.1	1918	14471.4	1918	11057.7	1918	5689.49	1918	4323.68	1918	11838.4	1918	8807.11
1919	13618.4	1919	11798.9	1919	14771.4	1919	10740.5	1919	6085.3	1919	5412.47	1919	10681.7	1919	6992.91
1920	13863.1	1920	12210.1	1920	15158.2	1920	11360	1920	5590.2	1920	4333.74	1920	8155.11	1920	6215.62
1921	13486.7	1921	10814.3	1921	14429.3	1921	11387.7	1921	5224.15	1921	4681.65	1921	6041.69	1921	5739.87
1922	12896.6	1922	11822.1	1922	13908.9	1922	11915.3	1922	5187.35	1922	4129.98	1922	6094.22	1922	5151.06
1923	12563.2	1923	12323.2	1923	14314.3	1923	12838.4	1923	5728.24	1923	3651.12	1923	7210.69	1923	5560.65
1924	11775.1	1924	10421.6	1924	14391.4	1924	12030.5	1924	6487.34	1924	4409.21	1924	7925.44	1924	6269.18
1925	11400.6	1925	10316.6	1925	15070.4	1925	12693	1925	6744	1925	5109.42	1925	8448.05	1925	6333.99
1926	13997.1	1926	11364	1926	14386.1	1926	13196.8	1926	7047.72	1926	6405.21	1926	9635.44	1926	5958.07
1927	18086.1	1927	15727.9	1927	15122.8	1927	12385.8	1927	7322.98	1927	6939.01	1927	10655.5	1927	6755.13
1928	21557.6	1928	18981.5	1928	14474.2	1928	12540.1	1928	8498.03	1928	6826.92	1928	12174.1	1928	8149.2
1929	20464.6	1929	22052.8	1929	15283.5	1929	12929	1929	8533.08	1929	7387.95	1929	12938.3	1929	9583.7
1930	20000.9	1930	18036.3	1930	15999.8	1930	12805.1	1930	9470.21	1930	7902.85	1930	11472.7	1930	7328.82
1931	20533.3	1931	22071.9	1931	15446.9	1931	12399.9	1931	9590.49	1931	8799.26	1931	15485.9	1931	12055
1932	17657.9	1932	19044.7	1932	14861.2	1932	11302.7	1932	11296	1932	10376.7	1932	18799.1	1932	14723
1933	18813.9	1933	17992	1933	14377	1933	11314.2	1933	11915.6	1933	10983.7	1933	17552.1	1933	11992.8
1934	20557.5	1934	19505	1934	13724.7	1934	11985.8	1934	12328.2	1934	10671.3	1934	13908.4	1934	9386.48
1935	21571.3	1935	19741.3	1935	12194.8	1935	10928	1935	12709.4	1935	10337	1935	10662.2	1935	6893.51
1936	20873.2	1936	18029.1	1936	10518.8	1936	9357.93	1936	10830.6	1936	8853.89	1936	9407.11	1936	7868.59
1937	21296.3	1937	18209.8	1937	9985.3	1937	9269.97	1937	9690.93	1937	8239.2	1937	9555.23	1937	9207.12
1938	18170.2	1938	17380.9	1938	10150.9	1938	8787.82	1938	8824.18	1938	7841.5	1938	9284.37	1938	8999.28
1939	16157.5	1939	16914.7	1939	9355.19	1939	7426.26	1939	8183.95	1939	6613.05	1939	9256.77	1939	9608.61
1940	17068.7	1940	16003.3	1940	8985.07	1940	7280.3	1940	7623.03	1940	5782.68	1940	9789.37	1940	11883.3
1941	16661.3	1941	11966.1	1941	9552.44	1941	7493.44	1941	7203.77	1941	5006.38	1941	9836.07	1941	11031.9
1942	18173.9	1942	15904.5	1942	10985.7	1942	9202.25	1942	6323.34	1942	3926.68	1942	8772.99	1942	10636
1943	13605.4	1943	9722.3	1943	9736.53	1943	7948.31	1943	5863.77	1943	3276.89	1943	8728.32	1943	12051.7
1944	18750.3	1944	16133.7	1944	9978.21	1944	8535.85	1944	5169.82	1944	3226.41	1944	6748.98	1944	8510.52
1945	15081.3	1945	14094.8	1945	7718.21	1945	5680.88	1945	4328.76	1945	3149.71	1945	6533.87	1945	8330.43
1946	14431.7	1946	12496.3	1946	8895.47	1946	7351.48	1946	3876.45	1946	2815.06	1946	4998.53	1946	5640.14
1947	11778.1	1947	11336	1947	8551.08	1947	7673.76	1947	4182.02	1947	2997.94	1947	6708.97	1947	7056.07
1948	11384.1	1948	12213.7	1948	9047.54	1948	7443.3	1948	4362.36	1948	3271.52	1948	8147.12	1948	8751.43
1949	11698.2	1949	12707.1	1949	9578.66	1949	8605.07	1949	5670	1949	4394.19	1949	8270.26	1949	9181.17
1950	10675.8	1950	12190.4	1950	10832.6	1950	9979.62	1950	6268.98	1950	4585.72	1950	10634.5	1950	11526.5
1951	7539.12	1951	9562	1951	10912.9	1951	9614.76	1951	6488.08	1951	5667.03	1951	11610.8	1951	12446.2
1952	4838.14	1952	7746.31	1952	11465.1	1952	9652.63	1952	7746.44	1952	7362.67	1952	10612.9	1952	14264.7
1953	3901.31	1953	7520.88	1953	12334.2	1953	9990	1953	6774.3	1953	5606.62	1953	9076.85	1953	12980
1954	4730.21	1954	7979.09	1954	11864.3	1954	10323.3	1954	6050.66	1954	5685.79	1954	9237.48	1954	12037.6
1955	7927.8	1955	9499.26	1955	11309.8	1955	10571.7	1955	5622.24	1955	5826.33	1955	11052	1955	11089.8
1956	9619.36	1956	12582.8	1956	11456	1956	10401.7	1956	5654.54	1956	5933.52	1956	11666.4	1956	12166.2
1957	13388.2	1957	16094.7	1957	11179.2	1957	9489.09	1957	5891.57	1957	5775.81	1957	12373.8	1957	13091.5
1958	19354	1958	20216	1958	10429.7	1958	9158.53	1958	6867.41	1958	5977.35	1958	13556.2	1958	12407.4
1959	21218.6	1959	21058.7	1959	10471.9	1959	9326.61	1959	6796.99	1959	5999.94	1959	11759.1	1959	9805.81
1960	25009.7	1960	24807.6	1960	10523.4	1960	8749.14	1960	8013.2	1960	6719.72	1960	10330.9	1960	9407.56
1961	28694.1	1961	26340.4	1961	9707.19	1961	7892.47	1961	8019.52	1961	6625.86	1961	9468	1961	9332.44
1962	31868.6	1962	29845.1	1962	10134.5	1962	8103.71	1962	8341.58	1962	6710.32	1962	7702.34	1962	8273.24
1963	24484.6	1963	22380.6	1963	10134.6	1963	8740.56	1963	8008.31	1963	6699.95	1963	7046.6	1963	7745.55
1964	32015.6	1964	30010.6	1964	9642.89	1964	8595.13	1964	8313.05	1964	6775.6	1964	6203.12	1964	7641.9
1965	33896.6	1965	33398.8	1965	9228.67	1965	8940.78	1965	7592.88	1965	6414.7	1965	8964.03	1965	10010.7
1966	36028.2	1966	39022.7	1966	9776.56	1966	9958.51	1966	7812.56	1966	6660.3	1966	6206.81	1966	7701.8
1967	37667.1	1967	40078.8	1967	12470.7	1967	12669.3	1967	7008.66	1967	5840.09	1967	5144.31	1967	6706.53
1968	37364.6	1968	37548.2	1968	13644.4	1968	13721.8	1968	7362.36	1968	6747.92	1968	4292.39	1968	5187.33
1969	33361.4	1969	30802.3	1969	17115.4	1969	15726.7	1969	7317.19	1969	7139.47	1969	3646.93	1969	4641.97
1970	31873.9	1970	30794.7	1970	17663	1970	16006.3	1970	8539.65	1970	8625.5	1970	4131.97	1970	4630.04
1971	27414	1971	24578.7	1971	15985.8	1971	15861.9	1971	10102	1971	9577.76	1971	3163.43	1971	5841.96
1972	26999	1972	23105.3	1972	16893.4	1972	15709.5	1972	10460.9	1972	9258.02	1972	2810.27	1972	4259.65
1973	28999.2	1973	26838.5	1973	14321.2	1973	13399.9	1973	8241.57	1973	6637.21	1973	2157.83	1973	3242.3
1974	30470.2	1974	28612.9	1974	14435.4	1974	13788.5	1974	6626.1	1974	5369.19	1974	1778.48	1974	2423.61
1975	29251.7	1975	27150.2	1975	14781.6	1975	13295.6	1975	7036.23	1975	6445.34	1975	2128.12	1975	2031.68
1976	25138.4	1976	25715.8	1976	13795.7	1976	13388.3	1976	7077.74	1976	6756.07	1976	2801.09	1976	2526.2
1977	25988.2	1977	26430.9	1977	15394	1977	13941.9	1977	6867.27	1977	6138.74	1977	3405.27	1977	3561.71
1978	25062.7	1978	24661.6	1978	17617.8	1978	16341.9	1978	6982.56	1978	6096.12	1978	5533.16	1978	6745
1979	23177.9	1979	22697.9	1979	19598.6	1979	18614.5	1979	8075.82	1979	6936.83	1979	4652.98	1979	4563.27
1980	21879.1	1980	22422.2	1980	21971.8	1980	19856.5	1980	9603.38	1980	8358.86	1980	4943.52	1980	4386.88
1981	18989.2	1981	21605.8	1981	19251.2	1981	17349.5	1981	10642.2	1981	10255.4	1981	6051.98	1981	4720
1982	15500.4	1982	17293.9	1982	22206.8	1982	20528.8	1982	9164.25	1982	9522.01	1982	6541.53	1982	5326.87
1983	13598.9	1983	12737.7	1983	17948.8	1983	16013.1	1983	8766.43	1983	8423.23	1983	6589.84	1983	5126.17
1984	12671.1	1984	10793.9	1984	22780.5	1984	19744.4	1984	7767.85	1984	7724.05	1984	7542.64	1984	6399.75
1985	11896.6	1985	11151.5	1985	18180.4	1985	15706.9	1985	6936.34	1985	6636.8	1985	8609.17	1985	9960.49
1986	11408.6	1986	13123.5	1986	21672	1986	18238.2	1986	8861.01	1986	9604.92	1986	7909.56	1986	10927.7
1987	10867.2	1987	14419.3	1987	23554.6	1987	20121.6	1987	8740.05	1987	9368.26	1987	8081.55	1987	11322.7
1988	12218.9	1988	13531.4	1988	26050.3	1988	23306.6	1988	11275.9	1988	10339	1988	7494.6	1988	9730.4
1989	13217.4	1989	13271.9	1989	28948.2	1989	26853.1	1989	9798.08	1989	8627.64	1989	10208	1989	9973.78
1990	13621.7	1990	12835.9	1990	31127.3	1990	27415.4	1990	8925.13	1990	8215.81	1990	12562.3	1990	11414
1991	14376.4	1991	11088.6	1991	32094.4	1991	25352.4	1991	8094.84	1991	7981.85	1991	13296.5	1991	13528.5
1992	21036.5	1992	14789.2	1992	24557.5	1992	17288.4	1992	6767.71	1992	5398.58	1992	9608.52	1992	8960.83
1993	24747.1	1993	17103.1	1993	28734.5	1993	23491.4	1993	6568.82	1993	5745.07	1993	11473.9	1993	10797.9
1994	32593.9	1994	28467.6	1994	25685.5	1994	23038.8	1994	7638.39	1994	6951.16	1994	11104.6	1994	10559.1
1995	25928.7	1995	21372.3	1995	21734.2	1995	18858.1	1995	4915.41	1995	3610.36	1995	10279.4	1995	11266.5
1996	31194	1996	27640.1	1996	20498.3	1996	15514	1996	7610.02	1996	6929.55	1996	11765.4	1996	10934.6
[truncated: 6,004 more rows]

## Sheet: T141A-G142A
Fluorescence intensity recorded along microtubules for the RFP and GFP channels (as described in Methods) and for indicated RFP- and GFP- tagged proteins .																	Figure 3C
GFP		RFP		GFP		RFP		GFP		RFP		GFP		RFP		Figure 3C
Pixel	Intensity	Pixel	Intensity	Pixel	Intensity	Pixel	Intensity	Pixel	Intensity	Pixel	Intensity	Pixel	Intensity	Pixel	Intensity
0	3280.75	0	2267.16	0	6520.78	0	2266.21	0	10799.1	0	9030.21	0	12284.6	0	6122.22
1	2904.01	1	1965.93	1	6604.16	1	1075.07	1	11007.7	1	9905	1	12277.1	1	5607.6
2	2942.25	2	2365.45	2	7829	2	2364.98	2	10196.4	2	9198.94	2	12941	2	6411.39
3	2923.51	3	2700.95	3	9762.35	3	2716.01	3	11130.7	3	9492.66	3	13489.3	3	6803.12
4	2069.9	4	2730.33	4	9607.36	4	2635.86	4	10581.7	4	8911.44	4	12664.8	4	6609.28
5	2955.25	5	3415.69	5	8865.52	5	2687.95	5	10377.3	5	8075.19	5	13268.7	5	7166.91
6	3827.26	6	3978.76	6	7354.72	6	3390.64	6	11062.1	6	8723.94	6	13538.2	6	8241.29
7	3324.05	7	3432.16	7	6660.05	7	3398.65	7	10731.6	7	8399.69	7	12915.5	7	7245.28
8	4973.38	8	4026.27	8	8411.76	8	4047.58	8	10519.1	8	9091.73	8	13554.8	8	8284.49
9	5128.6	9	4278.4	9	6740.11	9	3179.03	9	10046	9	8460.52	9	12327.7	9	7516.06
10	6434.64	10	5613.92	10	6028.25	10	2716.37	10	8877.84	10	7721.02	10	11579.8	10	6885.65
11	6742.36	11	4670.55	11	6685.81	11	2583.02	11	9089.01	11	8109.4	11	12901.9	11	7749.31
12	5986.61	12	3726.36	12	6938.09	12	2623	12	8829.3	12	7633.44	12	13545.8	12	8633.1
13	6274.66	13	4419.63	13	7459.66	13	3103.18	13	8235.05	13	7111.55	13	13239	13	7418.65
14	6028.64	14	4236.9	14	8054.03	14	3332.5	14	7588.58	14	7015.62	14	13243.1	14	6940.04
15	5473.92	15	2713.01	15	8022.15	15	3360.33	15	7186.93	15	6925.41	15	12952.1	15	6742.91
16	4031.74	16	1498.9	16	6850.56	16	3244.05	16	7720.35	16	8045.02	16	12040.7	16	6372
17	2429.67	17	316.265	17	7407.81	17	3379.41	17	8487.54	17	8711.78	17	13930.2	17	7365.38
18	1941.11	18	610.489	18	8034.18	18	4059.94	18	7242.96	18	8367.31	18	12708.5	18	6486.86
19	2676.2	19	938.025	19	7602.47	19	3669.63	19	5893.5	19	6864.5	19	12988.2	19	6846.93
20	2692.37	20	1052.6	20	7446.74	20	4201.06	20	5849.11	20	6827.45	20	13704.4	20	7757.44
21	2820.54	21	1625.08	21	6983.3	21	4142.07	21	6033.97	21	7034.48	21	14217.9	21	9123.8
22	2998.3	22	1114.14	22	4728.55	22	3377.17	22	7136.64	22	7147.84	22	14119.9	22	7440.94
23	3393.65	23	1143.51	23	3728.89	23	1429.5	23	6505.99	23	6397.55	23	13722.6	23	7760.56
24	4309.99	24	2766.34	24	4325.19	24	1232.67	24	5897.69	24	7501.82	24	14672.2	24	10074.5
25	3901.01	25	2247.74	25	4595.22	25	1103.25	25	5566.1	25	6778.72	25	15068.7	25	11078.5
26	4237.72	26	1984.58	26	3410.3	26	676.651	26	6213.86	26	6521.87	26	16871.7	26	10772.2
27	4607.65	27	2548.63	27	5779.08	27	1181.37	27	7677.3	27	7373.65	27	18386	27	11733.3
[truncated: 7,973 more rows]

## Sheet: K140A-T141A
Fluorescence intensity recorded along microtubules for the RFP and GFP channels (as described in Methods) and for indicated RFP- and GFP- tagged proteins .																	Figure 3C
[truncated: 8,002 more rows]

[truncated: 6 more sheets: G146A, M202A, T103A-S104A, V220A, D205A, D247A]
