# Supplementary material for: The cooperative binding of TDP-43 to GU-rich RNA repeats antagonizes TDP-43 aggregation
Source: eLife. 2021 Sep 7;10:e67605. doi: 10.7554/eLife.67605 (PMC8523171; doi:10.7554/eLife.67605)
Supplement: Figure 4—figure supplement 1—source data 1. [file elife-67605-fig4-figsupp1-data1.xlsx]

## Sheet: T141A-G142A; (GT)6
T141A/G142A + GT6
No	Molar Ratio	DeltaH (Kcal/mol)
2	0.0939305	-31.4248
3	0.17262	-30.8906
4	0.25167	-31.0463
5	0.3311	-30.7314
6	0.41091	-30.3108
7	0.49108	-30.3601
8	0.57162	-30.0462
9	0.65254	-29.2392
10	0.73383	-28.1088
11	0.81549	-23.2319
12	0.89752	-17.9491
13	0.97993	-12.6422
14	1.06271	-7.7403
15	1.14585	-4.12535
16	1.22938	-3.52269
17	1.31327	-2.95625
18	1.39753	-2.76471
19	1.48217	-2.46431
20	1.56718	-1.92692
21	1.65256	-1.66779
22	1.73831	-1.76596
23	1.82443	-1.65419
24	1.91093	-1.59513
25	1.9978	-1.60256
26	2.08503	-1.46949
27	2.17265	-1.59269
28	2.26063	-1.33643
29	2.34898	-1.38569
30	2.43771	-1.48802
31	2.52681	-1.50155
32	2.61628	-1.35511
33	2.70612	-1.27694
34	2.79634	-1.18977
35	2.88693	-1.32687
36	2.97788	-1.18535

## Sheet: T141A-G142A; (GT)12
T141A/G142A + GT12
No	Molar Ratio	DeltaH (Kcal/mol)
2	0.0573383	-74.7038
3	0.10537	-74.2632
4	0.15363	-73.4699
5	0.20212	-71.7102
6	0.25083	-69.236
7	0.29977	-64.6216
8	0.34894	-60.4742
9	0.39833	-54.1737
10	0.44795	-47.8558
11	0.4978	-42.1825
12	0.54788	-40.6887
13	0.59818	-38.13
14	0.64871	-35.3638
15	0.69947	-32.3522
16	0.75045	-29.0803
17	0.80166	-25.646
18	0.8531	-22.5416
19	0.90476	-19.1295
20	0.95666	-16.809
21	1.00877	-16.3571
22	1.06112	-16.2149
23	1.11369	-15.8912
24	1.16649	-15.7936
25	1.21952	-15.5261
26	1.27277	-15.2832
27	1.32625	-15.2076
28	1.37996	-14.9724
29	1.4339	-15.2561
30	1.48806	-15.1993
31	1.54245	-15.5206
32	1.59706	-15.4492
33	1.65191	-15.3689
34	1.70698	-15.3251
35	1.76227	-15.1245
36	1.8178	-14.9417

## Sheet: G146A; (GT)6
G146A + GT6
No	Molar Ratio	DeltaH (Kcal/mol)
2	0.0614339	-30.0992
3	0.1129	-30.1021
4	0.1646	-29.9314
5	0.21655	-29.8671
6	0.26875	-29.1768
7	0.32118	-28.6504
8	0.37386	-28.491
9	0.42679	-27.5737
10	0.47995	-27.5055
11	0.53336	-27.0431
12	0.58701	-26.6704
13	0.64091	-25.6086
14	0.69505	-24.9917
15	0.74943	-24.1027
16	0.80405	-22.3008
17	0.85892	-20.8785
18	0.91404	-17.106
19	0.96939	-10.9497
20	1.02499	-7.12525
21	1.08083	-4.68994
22	1.13691	-3.33002
23	1.19324	-2.64898
24	1.24981	-2.40842
25	1.30663	-2.39591
26	1.36369	-2.12474
27	1.42099	-2.09125
28	1.47853	-2.0538
29	1.53632	-1.69499
30	1.59435	-1.77317
31	1.65262	-1.56681
32	1.71114	-1.42938
33	1.7699	-1.33724
34	1.8289	-1.67888
35	1.88815	-1.5135
36	1.94764	-1.35341

## Sheet: G146A; (GT)12
G146A + GT12
No	Molar Ratio	DeltaH (Kcal/mol)
2	0.0347613	-69.4206
3	0.063881	-69.5194
4	0.0931383	-68.3453
5	0.12253	-66.225
6	0.15207	-65.323
7	0.18174	-62.1186
8	0.21154	-61.8304
9	0.24149	-57.6926
10	0.27157	-55.8111
11	0.30179	-52.4137
12	0.33215	-47.9103
13	0.36265	-43.2634
14	0.39328	-36.7279
15	0.42405	-30.7739
16	0.45496	-27.3031
17	0.48601	-24.8338
18	0.51719	-24.0125
19	0.54851	-22.8512
20	0.57997	-22.5166
21	0.61157	-22.0231
22	0.6433	-21.3677
23	0.67518	-19.7376
24	0.70719	-18.4328
25	0.73933	-16.4946
26	0.77162	-12.7378
27	0.80404	-9.18314
28	0.8366	-6.09899
29	0.8693	-3.74729
30	0.90214	-2.50799
31	0.93511	-1.99909
32	0.96822	-1.74608
33	1.00147	-1.4655
34	1.03485	-1.52251
35	1.06838	-1.29486
36	1.10204	-0.934736

## Sheet: Q213A; (GT)6
Q213A + GT6
No	Molar Ratio	DeltaH (Kcal/mol)
2	0.0539655	-34.3037
3	0.0991724	-33.9371
4	0.14459	-33.2733
5	0.19023	-33.801
6	0.23608	-32.927
7	0.28214	-33.5004
8	0.32841	-32.6467
9	0.3749	-33.3098
10	0.4216	-32.8574
11	0.46852	-32.6872
12	0.51565	-32.3016
13	0.56299	-31.5795
14	0.61055	-31.7226
15	0.65832	-30.5895
16	0.70631	-29.9485
17	0.75451	-28.6638
18	0.80292	-27.0566
19	0.85154	-19.987
20	0.90038	-10.1965
21	0.94943	-4.97552
22	0.9987	-2.82166
23	1.04818	-2.55609
24	1.09788	-2.34355
25	1.14778	-2.35762
26	1.1979	-2.49959
27	1.24824	-2.13154
28	1.29879	-2.34519
29	1.34955	-1.9913
30	1.40053	-1.95935
31	1.45172	-1.78528
32	1.50312	-1.82112
33	1.55474	-1.68488
34	1.60657	-1.55958
35	1.65861	-1.4574
36	1.71087	-1.69884

## Sheet: Q213A; (GT)12
Q213A + (GT)6
No	Molar Ratio	DeltaH (Kcal/mol)
2	0.0539655	-34.3037
3	0.0991724	-33.9371
4	0.14459	-33.2733
5	0.19023	-33.801
6	0.23608	-32.927
7	0.28214	-33.5004
8	0.32841	-32.6467
9	0.3749	-33.3098
10	0.4216	-32.8574
11	0.46852	-32.6872
12	0.51565	-32.3016
13	0.56299	-31.5795
14	0.61055	-31.7226
15	0.65832	-30.5895
16	0.70631	-29.9485
17	0.75451	-28.6638
18	0.80292	-27.0566
19	0.85154	-19.987
20	0.90038	-10.1965
21	0.94943	-4.97552
22	0.9987	-2.82166
23	1.04818	-2.55609
24	1.09788	-2.34355
25	1.14778	-2.35762
26	1.1979	-2.49959
27	1.24824	-2.13154
28	1.29879	-2.34519
29	1.34955	-1.9913
30	1.40053	-1.95935
31	1.45172	-1.78528
32	1.50312	-1.82112
33	1.55474	-1.68488
34	1.60657	-1.55958
35	1.65861	-1.4574
36	1.71087	-1.69884
