# Supplementary material for: The cooperative binding of TDP-43 to GU-rich RNA repeats antagonizes TDP-43 aggregation
Source: eLife. 2021 Sep 7;10:e67605. doi: 10.7554/eLife.67605 (PMC8523171; doi:10.7554/eLife.67605)
Supplement: Figure 4—figure supplement 3—source data 1. [file elife-67605-fig4-figsupp3-data1.xlsx]

## Sheet: Fig Supplement 11
(GU)12 – RRM12 WT
RMSD Protein CA	Probability
0.36	0.00124875
0.44	0.00124875
0.52	0.00124875
0.6	0.00124875
0.68	0.0024975
0.76	0.00499501
0.84	0.00749251
0.92	0.00874126
1	0.0124875
1.08	0.0174825
1.16	0.0224775
1.24	0.0237263
1.32	0.02997
1.4	0.0337163
1.48	0.0337163
1.56	0.0362138
1.64	0.0511988
1.72	0.0649351
1.8	0.0749251
1.88	0.0824176
1.96	0.0986513
2.04	0.127373
2.12	0.162338
2.2	0.236014
2.28	0.322178
2.36	0.432068
2.44	0.526973
2.52	0.643107
2.6	0.772977
2.68	0.874126
2.76	0.936563
2.84	0.974026
2.92	0.97028
3	0.92033
3.08	0.851648
3.16	0.749251
3.24	0.649351
3.32	0.525724
3.4	0.383367
3.48	0.270979
3.56	0.188561
3.64	0.122378
3.72	0.0849151
3.8	0.0574426
3.88	0.0387113
3.96	0.0262238
4.04	0.0137363
4.12	0.00624376
4.2	0.00499501
4.28	0.00374625
4.36	0.0024975
4.44	0.00124875
4.52	-1.90473e-16
4.6	-1.90473e-16
4.68	-1.90473e-16
4.76	-1.90473e-16
4.84	-1.90473e-16
4.92	-1.90473e-16
5	-1.90473e-16
5.08	-1.90473e-16
5.16	-1.90473e-16
5.24	-1.90473e-16
5.32	-1.90473e-16
5.4	-1.90473e-16
5.48	-1.90473e-16
5.56	-1.90473e-16
5.64	-1.90473e-16
5.72	-1.90473e-16
5.8	-1.90473e-16
5.88	-1.90473e-16
5.96	-1.90473e-16
6.04	-1.90473e-16
6.12	-1.90473e-16
6.2	-1.90473e-16
6.28	-1.90473e-16
6.36	-1.90473e-16
6.44	-1.90473e-16
6.52	-1.90473e-16
6.6	-1.90473e-16
6.68	-1.90473e-16
6.76	-1.90473e-16
6.84	-1.90473e-16
6.92	-1.90473e-16
7	-1.90473e-16
7.08	-1.90473e-16
7.16	-1.90473e-16
7.24	-1.90473e-16
7.32	-1.90473e-16
7.4	-1.90473e-16
7.48	-1.90473e-16
7.56	-1.90473e-16
7.64	-1.90473e-16
(GU)12 – RRM12 Q213A
RMSD Protein CA	Probability
0.36	0
0.44	0
0.52	0
0.6	0
0.68	0
0.76	0
0.84	0
0.92	0
1	0
1.08	0
1.16	0
1.24	0
1.32	0
1.4	0
1.48	0
1.56	0
1.64	0
1.72	0
1.8	0
1.88	0
1.96	0
2.04	0
2.12	0.00124751
2.2	0.00124751
2.28	0.00374252
2.36	0.00873253
2.44	0.0237026
2.52	0.0361776
2.6	0.0511477
2.68	0.0760978
2.76	0.0860778
2.84	0.111028
2.92	0.129741
3	0.142216
3.08	0.173403
3.16	0.193363
3.24	0.249501
3.32	0.294411
3.4	0.338074
3.48	0.384232
3.56	0.451597
3.64	0.508982
3.72	0.562625
3.8	0.601297
3.88	0.628743
3.96	0.687375
4.04	0.682385
4.12	0.693613
4.2	0.68987
4.28	0.653693
4.36	0.621257
4.44	0.57011
4.52	0.52021
4.6	0.492764
4.68	0.436627
4.76	0.356786
4.84	0.291916
4.92	0.224551
5	0.170908
5.08	0.135978
5.16	0.0910679
5.24	0.0598802
5.32	0.0361776
5.4	0.012475
5.48	0.00748503
5.56	0.00374252
5.64	0.00249501
5.72	0.00124751
5.8	7.07767e-17
5.88	7.07767e-17
5.96	7.07767e-17
6.04	7.07767e-17
6.12	7.07767e-17
6.2	7.07767e-17
6.28	7.07767e-17
6.36	7.07767e-17
6.44	7.07767e-17
6.52	7.07767e-17
6.6	7.07767e-17
6.68	7.07767e-17
6.76	7.07767e-17
6.84	7.07767e-17
6.92	7.07767e-17
7	7.07767e-17
7.08	7.07767e-17
7.16	7.07767e-17
7.24	7.07767e-17
7.32	7.07767e-17
7.4	7.07767e-17
7.48	7.07767e-17
7.56	7.07767e-17
7.64	7.07767e-17
(GU)12 – RRM12 G146A
RMSD Protein CA	Probability
0.36	0
0.44	0
0.52	0
0.6	0
0.68	0
0.76	0
0.84	0
0.92	0
1	0
1.08	0
1.16	0
1.24	0
1.32	0
1.4	0
1.48	0
1.56	0
1.64	0
1.72	0
1.8	0
1.88	0
1.96	0.00249501
2.04	0.0137226
2.12	0.0399202
2.2	0.0661178
2.28	0.0973054
2.36	0.137226
2.44	0.197106
2.52	0.254491
2.6	0.328094
2.68	0.416667
2.76	0.528942
2.84	0.611277
2.92	0.676148
3	0.726048
3.08	0.773453
3.16	0.805888
3.24	0.818363
3.32	0.823353
3.4	0.798403
3.48	0.748503
3.56	0.658683
3.64	0.587575
3.72	0.50524
3.8	0.440369
3.88	0.368014
3.96	0.299401
4.04	0.230788
4.12	0.172156
4.2	0.123503
4.28	0.0848303
4.36	0.0598802
4.44	0.0374251
4.52	0.0286926
4.6	0.0174651
4.68	0.0112275
4.76	0.00748503
4.84	0.00374252
4.92	-2.35922e-17
5	-2.35922e-17
5.08	-2.35922e-17
5.16	-2.35922e-17
5.24	-2.35922e-17
5.32	-2.35922e-17
5.4	-2.35922e-17
5.48	-2.35922e-17
5.56	-2.35922e-17
5.64	-2.35922e-17
5.72	-2.35922e-17
5.8	-2.35922e-17
5.88	-2.35922e-17
5.96	-2.35922e-17
6.04	-2.35922e-17
6.12	-2.35922e-17
6.2	-2.35922e-17
6.28	-2.35922e-17
6.36	-2.35922e-17
6.44	-2.35922e-17
6.52	-2.35922e-17
6.6	-2.35922e-17
6.68	-2.35922e-17
6.76	-2.35922e-17
6.84	-2.35922e-17
6.92	-2.35922e-17
7	-2.35922e-17
7.08	-2.35922e-17
7.16	-2.35922e-17
7.24	-2.35922e-17
7.32	-2.35922e-17
7.4	-2.35922e-17
7.48	-2.35922e-17
7.56	-2.35922e-17
7.64	-2.35922e-17
(GU)12 – RRM12 T141A/G142A
RMSD Protein CA	Probability
0.36	0
0.44	0
0.52	0
0.6	0
0.68	0
0.76	0
0.84	0
0.92	0
1	0
1.08	0
1.16	0
1.24	0
1.32	0
1.4	0
1.48	0
1.56	0
1.64	0
1.72	0
1.8	0
1.88	0
1.96	0.00124751
2.04	0.00249501
2.12	0.00249501
2.2	0.00873253
2.28	0.00998004
2.36	0.0149701
2.44	0.0237026
2.52	0.0286926
2.6	0.0349301
2.68	0.0424152
2.76	0.0511477
2.84	0.0623753
2.92	0.0760978
3	0.0973054
3.08	0.106038
3.16	0.116018
3.24	0.125998
3.32	0.138473
3.4	0.149701
3.48	0.168413
3.56	0.189621
3.64	0.218313
3.72	0.237026
3.8	0.256986
3.88	0.296906
3.96	0.334331
4.04	0.386727
4.12	0.450349
4.2	0.499002
4.28	0.557635
4.36	0.602545
4.44	0.628743
4.52	0.661178
4.6	0.6749
4.68	0.666168
4.76	0.657435
4.84	0.638723
4.92	0.578842
5	0.542665
5.08	0.469062
5.16	0.397954
5.24	0.335579
5.32	0.271956
5.4	0.212076
5.48	0.170908
5.56	0.127246
5.64	0.0748503
5.72	0.0536427
5.8	0.0237026
5.88	0.012475
5.96	0.00748503
6.04	0.00249501
6.12	0.00124751
6.2	-1.54043e-16
6.28	-1.54043e-16
6.36	-1.54043e-16
6.44	-1.54043e-16
6.52	-1.54043e-16
6.6	-1.54043e-16
6.68	-1.54043e-16
6.76	-1.54043e-16
6.84	-1.54043e-16
6.92	-1.54043e-16
7	-1.54043e-16
7.08	-1.54043e-16
7.16	-1.54043e-16
7.24	-1.54043e-16
7.32	-1.54043e-16
7.4	-1.54043e-16
7.48	-1.54043e-16
7.56	-1.54043e-16
7.64	-1.54043e-16
(GU)6 – RRM12 WT
DE	Probability
-396.63	3.65578e-05
-394.479	4.81095e-05
-392.328	5.63995e-05
-390.177	6.89025e-05
-388.026	8.56185e-05
-385.875	0.000101927
-383.724	0.000112527
-381.573	0.000127884
-379.422	0.000148813
-377.271	0.000171917
-375.12	0.000198282
-372.968	0.000222336
-370.817	0.000255225
-368.666	0.000287977
-366.515	0.000324127
-364.364	0.000367208
-362.213	0.000428636
-360.062	0.000499849
-357.911	0.000581662
-355.76	0.000676794
-353.609	0.000776682
-351.458	0.000894918
-349.307	0.00103
-347.156	0.00117678
-345.005	0.00133266
-342.854	0.00150553
-340.703	0.00168234
-338.552	0.00187301
-336.401	0.00205648
-334.25	0.00224538
-332.098	0.00244679
-329.947	0.00263257
-327.796	0.00281916
-325.645	0.002987
-323.494	0.00315905
-321.343	0.00331779
-319.192	0.00346211
-317.041	0.00357301
-314.89	0.00368418
-312.739	0.00377075
-310.588	0.00382443
-308.437	0.00386765
-306.286	0.00386439
-304.135	0.00384087
-301.984	0.00378842
-299.833	0.00369655
-297.682	0.00358456
-295.531	0.00345586
-293.38	0.0032989
-291.228	0.00311026
-289.077	0.00291429
-286.926	0.00269807
-284.775	0.00248076
-282.624	0.00226087
-280.473	0.00203256
-278.322	0.00182177
-276.171	0.00160623
-274.02	0.00139123
-271.869	0.00119254
-269.718	0.00101709
-267.567	0.000849934
-265.416	0.00070248
-263.265	0.000574188
-261.114	0.000464515
-258.963	0.000368567
-256.812	0.000282541
-254.661	0.000215134
-252.51	0.00016716
-250.359	0.000121361
-248.207	8.53467e-05
-246.056	6.00689e-05
-243.905	4.11784e-05
-241.754	2.67728e-05
-239.603	1.84827e-05
-237.452	1.2503e-05
-235.301	7.47463e-06
-233.15	4.34888e-06
-230.999	2.44624e-06
-228.848	1.63083e-06
-226.697	8.15415e-07
-224.546	5.4361e-07
-222.395	2.71805e-07
-220.244	-1.24031e-18
-218.093	-1.24031e-18
-215.942	-1.24031e-18
-213.791	-1.24031e-18
-211.64	-1.24031e-18
-209.489	-1.24031e-18
-207.337	-1.24031e-18
-205.186	-1.24031e-18
-203.035	-1.24031e-18
-200.884	-1.24031e-18
(GU)6 – RRM12 Q213A
DE	Probability
-396.63	0
-394.479	0
-392.328	1.111e-06
-390.177	1.111e-06
-388.026	2.222e-06
-385.875	3.333e-06
-383.724	4.444e-06
-381.573	5.555e-06
-379.422	7.777e-06
-377.271	1.2221e-05
-375.12	1.8887e-05
-372.968	2.8886e-05
-370.817	4.5551e-05
-368.666	6.7771e-05
-366.515	9.8879e-05
-364.364	0.000134431
-362.213	0.00018887
-360.062	0.000256641
-357.911	0.000321079
-355.76	0.000387739
-353.609	0.000463287
-351.458	0.000537724
-349.307	0.000614383
-347.156	0.000693264
-345.005	0.000774367
-342.854	0.000854359
-340.703	0.000885467
-338.552	0.000921019
-336.401	0.000946572
-334.25	0.000979902
-332.098	0.000994345
-329.947	0.00101212
-327.796	0.00100879
-325.645	0.00101879
-323.494	0.00103434
-321.343	0.00103323
-319.192	0.00104434
-317.041	0.001071
-314.89	0.00113433
-312.739	0.00119655
-310.588	0.00126876
-308.437	0.00137986
-306.286	0.00149985
-304.135	0.00163761
-301.984	0.00173427
-299.833	0.00186648
-297.682	0.00201646
-295.531	0.00217423
-293.38	0.00230199
-291.228	0.00243531
-289.077	0.00256641
-286.926	0.00269306
-284.775	0.00282861
-282.624	0.00291971
-280.473	0.00304747
-278.322	0.0031508
-276.171	0.00323301
-274.02	0.00328078
-271.869	0.00330078
-269.718	0.00335189
-267.567	0.00334633
-265.416	0.00331078
-263.265	0.00321301
-261.114	0.00310747
-258.963	0.00297526
-256.812	0.00282638
-254.661	0.0026664
-252.51	0.00251975
-250.359	0.00235643
-248.207	0.00213868
-246.056	0.00195869
-243.905	0.00174538
-241.754	0.00157095
-239.603	0.00139986
-237.452	0.00124654
-235.301	0.00108767
-233.15	0.000949905
-230.999	0.000787699
-228.848	0.000672155
-226.697	0.000558833
-224.546	0.000451066
-222.395	0.000376629
-220.244	0.000308858
-218.093	0.000253308
-215.942	0.00018887
-213.791	0.000147763
-211.64	0.000117766
-209.489	9.4435e-05
-207.337	6.9993e-05
-205.186	4.9995e-05
-203.035	4.3329e-05
-200.884	2.6664e-05
(GU)6 – RRM12 G146A
DE	Probability
-396.63	0
-394.479	0
-392.328	0
-390.177	0
-388.026	0
-385.875	0
-383.724	0
-381.573	0
-379.422	0
-377.271	0
-375.12	0
-372.968	0
-370.817	0
-368.666	1.111e-06
-366.515	2.222e-06
-364.364	4.444e-06
-362.213	8.888e-06
-360.062	1.8887e-05
-357.911	3.8885e-05
-355.76	6.8882e-05
-353.609	0.0001111
-351.458	0.00016665
-349.307	0.000218867
-347.156	0.000286638
-345.005	0.000378851
-342.854	0.000493284
-340.703	0.000609939
-338.552	0.000771034
-336.401	0.000931018
-334.25	0.00107656
-332.098	0.00125099
-329.947	0.00144208
-327.796	0.0016665
-325.645	0.0018887
-323.494	0.00209201
-321.343	0.00226311
-319.192	0.00246309
-317.041	0.00260418
-314.89	0.00271084
-312.739	0.0028275
-310.588	0.00292971
-308.437	0.00298526
-306.286	0.00295193
-304.135	0.00291193
-301.984	0.00286194
-299.833	0.00281083
-297.682	0.00271084
-295.531	0.00260752
-293.38	0.00252753
-291.228	0.00242865
-289.077	0.00231643
-286.926	0.00220089
-284.775	0.00213645
-282.624	0.00203535
-280.473	0.00192314
-278.322	0.0018387
-276.171	0.00175538
-274.02	0.00169094
-271.869	0.00163095
-269.718	0.00156095
-267.567	0.00148763
-265.416	0.00144097
-263.265	0.00140764
-261.114	0.00139319
-258.963	0.0014043
-256.812	0.00141541
-254.661	0.00143652
-252.51	0.0014443
-250.359	0.00144319
-248.207	0.00147096
-246.056	0.00150207
-243.905	0.00152096
-241.754	0.0015254
-239.603	0.00153874
-237.452	0.00152429
-235.301	0.00147096
-233.15	0.00145319
-230.999	0.00140764
-228.848	0.00137542
-226.697	0.0013032
-224.546	0.00122654
-222.395	0.00114322
-220.244	0.00103656
-218.093	0.000926574
-215.942	0.000829917
-213.791	0.000747703
-211.64	0.000623271
-209.489	0.000527725
-207.337	0.000426624
-205.186	0.000352187
-203.035	0.000276639
-200.884	0.000205535
(GU)6 – RRM12 T141A/G142A
DE	Probability
-396.63	2.6664e-05
-394.479	3.4441e-05
-392.328	4.7773e-05
-390.177	6.3327e-05
-388.026	7.9992e-05
-385.875	0.000102212
-383.724	0.000138875
-381.573	0.000168872
-379.422	0.000209979
-377.271	0.000247753
-375.12	0.00029997
-372.968	0.00036663
-370.817	0.000431068
-368.666	0.000483285
-366.515	0.000531058
-364.364	0.000602162
-362.213	0.000671044
-360.062	0.000739926
-357.911	0.000812141
-355.76	0.000892133
-353.609	0.000969903
-351.458	0.00102768
-349.307	0.00106989
-347.156	0.00114766
-345.005	0.00120099
-342.854	0.00126321
-340.703	0.00131209
-338.552	0.00136764
-336.401	0.00140208
-334.25	0.00146208
-332.098	0.00151318
-329.947	0.0015654
-327.796	0.00164761
-325.645	0.00173094
-323.494	0.00183648
-321.343	0.00191314
-319.192	0.00204313
-317.041	0.00218089
-314.89	0.00235643
-312.739	0.00247753
-310.588	0.00264196
-308.437	0.0027675
-306.286	0.00292193
-304.135	0.00304081
-301.984	0.00317079
-299.833	0.00329856
-297.682	0.003343
-295.531	0.00335855
-293.38	0.00334078
-291.228	0.003333
-289.077	0.00326745
-286.926	0.00321301
-284.775	0.00310191
-282.624	0.00295859
-280.473	0.00283861
-278.322	0.00267196
-276.171	0.00251753
-274.02	0.00237643
-271.869	0.00221089
-269.718	0.00203202
-267.567	0.00185759
-265.416	0.00170539
-263.265	0.00154651
-261.114	0.00141653
-258.963	0.00124099
-256.812	0.00108767
-254.661	0.000945461
-252.51	0.000804364
-250.359	0.000687709
-248.207	0.000592163
-246.056	0.00049995
-243.905	0.000408848
-241.754	0.000331078
-239.603	0.000263307
-237.452	0.000207757
-235.301	0.00016665
-233.15	0.000134431
-230.999	0.000106656
-228.848	7.9992e-05
-226.697	5.4439e-05
-224.546	3.4441e-05
-222.395	2.222e-05
-220.244	1.3332e-05
-218.093	5.555e-06
-215.942	3.333e-06
-213.791	3.333e-06
-211.64	-3.0832e-19
-209.489	-3.0832e-19
-207.337	-3.0832e-19
-205.186	-3.0832e-19
-203.035	-3.0832e-19
-200.884	-3.0832e-19
(GU)6 – RRM12 WT
RMSD Protein CA	Probability
0.36	0.00124875
0.44	0.0024975
0.52	0.0024975
0.6	0.00374625
0.68	0.00374625
0.76	0.00624376
0.84	0.00749251
0.92	0.0174825
1	0.0462038
1.08	0.0836663
1.16	0.141109
1.24	0.196054
1.32	0.224775
1.4	0.246004
1.48	0.260989
1.56	0.293457
1.64	0.334665
1.72	0.360889
1.8	0.367133
1.88	0.352148
1.96	0.305944
2.04	0.255994
2.12	0.233516
2.2	0.234765
2.28	0.260989
2.36	0.282218
2.44	0.322178
2.52	0.405844
2.6	0.473277
2.68	0.556943
2.76	0.633117
2.84	0.674326
2.92	0.705544
3	0.725524
3.08	0.701798
3.16	0.661838
3.24	0.584416
3.32	0.464535
3.4	0.362138
3.48	0.255994
3.56	0.168581
3.64	0.121129
3.72	0.0824176
3.8	0.0387113
3.88	0.0212288
3.96	0.00499501
4.04	1.81799e-16
4.12	1.81799e-16
4.2	1.81799e-16
4.28	1.81799e-16
4.36	1.81799e-16
4.44	1.81799e-16
4.52	1.81799e-16
4.6	1.81799e-16
4.68	1.81799e-16
4.76	1.81799e-16
4.84	1.81799e-16
4.92	1.81799e-16
5	1.81799e-16
5.08	1.81799e-16
5.16	1.81799e-16
5.24	1.81799e-16
5.32	1.81799e-16
5.4	1.81799e-16
5.48	1.81799e-16
5.56	1.81799e-16
5.64	1.81799e-16
5.72	1.81799e-16
5.8	1.81799e-16
5.88	1.81799e-16
5.96	1.81799e-16
6.04	1.81799e-16
6.12	1.81799e-16
6.2	1.81799e-16
6.28	1.81799e-16
6.36	1.81799e-16
6.44	1.81799e-16
6.52	1.81799e-16
6.6	1.81799e-16
6.68	1.81799e-16
6.76	1.81799e-16
6.84	1.81799e-16
6.92	1.81799e-16
7	1.81799e-16
7.08	1.81799e-16
7.16	1.81799e-16
7.24	1.81799e-16
7.32	1.81799e-16
7.4	1.81799e-16
7.48	1.81799e-16
7.56	1.81799e-16
7.64	1.81799e-16
(GU)6 – RRM12 Q213A
RMSD Protein CA	Probability
0.36	0.00374625
0.44	0.0112388
0.52	0.0162338
0.6	0.0274725
0.68	0.0337163
0.76	0.0437063
0.84	0.0574426
0.92	0.0699301
1	0.0811688
1.08	0.0986513
1.16	0.11988
1.24	0.144855
1.32	0.171079
1.4	0.196054
1.48	0.216034
1.56	0.252248
1.64	0.343407
1.72	0.513237
1.8	0.636863
1.88	0.689311
1.96	0.721778
2.04	0.785465
2.12	0.809191
2.2	0.817932
2.28	0.824176
2.36	0.809191
2.44	0.719281
2.52	0.570679
2.6	0.452048
2.68	0.398352
2.76	0.360889
2.84	0.270979
2.92	0.227273
3	0.191059
3.08	0.164835
3.16	0.138611
3.24	0.127373
3.32	0.0936563
3.4	0.0774226
3.48	0.0611888
3.56	0.0437063
3.64	0.0374625
3.72	0.0262238
3.8	0.0174825
3.88	0.0112388
3.96	0.00624376
4.04	-9.71445e-18
4.12	-9.71445e-18
4.2	-9.71445e-18
4.28	-9.71445e-18
4.36	-9.71445e-18
4.44	-9.71445e-18
4.52	-9.71445e-18
4.6	-9.71445e-18
4.68	-9.71445e-18
4.76	-9.71445e-18
4.84	-9.71445e-18
4.92	-9.71445e-18
5	-9.71445e-18
5.08	-9.71445e-18
5.16	-9.71445e-18
5.24	-9.71445e-18
5.32	-9.71445e-18
5.4	-9.71445e-18
5.48	-9.71445e-18
5.56	-9.71445e-18
5.64	-9.71445e-18
5.72	-9.71445e-18
5.8	-9.71445e-18
5.88	-9.71445e-18
5.96	-9.71445e-18
6.04	-9.71445e-18
6.12	-9.71445e-18
6.2	-9.71445e-18
6.28	-9.71445e-18
6.36	-9.71445e-18
6.44	-9.71445e-18
6.52	-9.71445e-18
6.6	-9.71445e-18
6.68	-9.71445e-18
6.76	-9.71445e-18
6.84	-9.71445e-18
6.92	-9.71445e-18
7	-9.71445e-18
7.08	-9.71445e-18
7.16	-9.71445e-18
7.24	-9.71445e-18
7.32	-9.71445e-18
7.4	-9.71445e-18
7.48	-9.71445e-18
7.56	-9.71445e-18
7.64	-9.71445e-18
(GU)6 – RRM12 G146A
RMSD Protein CA	Probability
0.36	0.00249501
0.44	0.00249501
0.52	0.00249501
0.6	0.00249501
0.68	0.00374252
0.76	0.00374252
0.84	0.00249501
0.92	0.00499002
1	0.00623752
1.08	0.00748503
1.16	0.012475
1.24	0.0149701
1.32	0.0174651
1.4	0.0187126
1.48	0.0174651
1.56	0.0249501
1.64	0.0286926
1.72	0.0299401
1.8	0.0361776
1.88	0.0449102
1.96	0.0523952
2.04	0.0586327
2.12	0.0723553
2.2	0.0923154
2.28	0.113523
2.36	0.143463
2.44	0.185878
2.52	0.251996
2.6	0.363024
2.68	0.477794
2.76	0.592565
2.84	0.687375
2.92	0.789671
3	0.875749
3.08	0.936876
3.16	0.970559
3.24	0.960579
3.32	0.913174
3.4	0.807136
3.48	0.69985
3.56	0.576347
3.64	0.475299
3.72	0.361776
3.8	0.255739
3.88	0.175898
3.96	0.106038
4.04	0.0698603
4.12	0.0474052
4.2	0.0349301
4.28	0.0174651
4.36	0.0137226
4.44	0.0112275
4.52	0.00623752
4.6	0.00499002
4.68	0.00249501
4.76	0.00124751
4.84	3.04617e-16
4.92	3.04617e-16
5	3.04617e-16
5.08	3.04617e-16
5.16	3.04617e-16
5.24	3.04617e-16
5.32	3.04617e-16
5.4	3.04617e-16
5.48	3.04617e-16
5.56	3.04617e-16
5.64	3.04617e-16
5.72	3.04617e-16
5.8	3.04617e-16
5.88	3.04617e-16
5.96	3.04617e-16
6.04	3.04617e-16
6.12	3.04617e-16
6.2	3.04617e-16
6.28	3.04617e-16
6.36	3.04617e-16
6.44	3.04617e-16
6.52	3.04617e-16
6.6	3.04617e-16
6.68	3.04617e-16
6.76	3.04617e-16
6.84	3.04617e-16
6.92	3.04617e-16
7	3.04617e-16
7.08	3.04617e-16
7.16	3.04617e-16
7.24	3.04617e-16
7.32	3.04617e-16
7.4	3.04617e-16
7.48	3.04617e-16
7.56	3.04617e-16
7.64	3.04617e-16
(GU)6 – RRM12 T141A/G142A
RMSD Protein CA	Probability
0.36	0.00249501
0.44	0.00249501
0.52	0.00249501
0.6	0.00249501
0.68	0.00374252
0.76	0.00374252
0.84	0.00499002
0.92	0.00499002
1	0.00499002
1.08	0.00499002
1.16	0.00499002
1.24	0.00623752
1.32	0.00748503
1.4	0.00998004
1.48	0.012475
1.56	0.0162176
1.64	0.0224551
1.72	0.0286926
1.8	0.0324351
1.88	0.0336826
1.96	0.0361776
2.04	0.0349301
2.12	0.0374251
2.2	0.0349301
2.28	0.0374251
2.36	0.0424152
2.44	0.0349301
2.52	0.0411677
2.6	0.0499002
2.68	0.0823353
2.76	0.118513
2.84	0.172156
2.92	0.251996
3	0.326846
3.08	0.404192
3.16	0.50025
3.24	0.577595
3.32	0.648703
3.4	0.687375
3.48	0.728543
3.56	0.753493
3.64	0.753493
3.72	0.722305
3.8	0.686128
3.88	0.653693
3.96	0.577595
4.04	0.527695
4.12	0.474052
4.2	0.439122
4.28	0.374252
4.36	0.321856
4.44	0.274451
4.52	0.228293
4.6	0.189621
4.68	0.138473
4.76	0.10978
4.84	0.0798403
4.92	0.0499002
5	0.0336826
5.08	0.0237026
5.16	0.012475
5.24	0.00623752
5.32	1.34615e-16
5.4	1.34615e-16
5.48	1.34615e-16
5.56	1.34615e-16
5.64	1.34615e-16
5.72	1.34615e-16
5.8	1.34615e-16
5.88	1.34615e-16
5.96	1.34615e-16
6.04	1.34615e-16
6.12	1.34615e-16
6.2	1.34615e-16
6.28	1.34615e-16
6.36	1.34615e-16
6.44	1.34615e-16
6.52	1.34615e-16
6.6	1.34615e-16
6.68	1.34615e-16
6.76	1.34615e-16
6.84	1.34615e-16
6.92	1.34615e-16
7	1.34615e-16
7.08	1.34615e-16
7.16	1.34615e-16
7.24	1.34615e-16
7.32	1.34615e-16
7.4	1.34615e-16
7.48	1.34615e-16
7.56	1.34615e-16
7.64	1.34615e-16
(GU)6 – RRM12 WT
RMSD RNA	Probability
0.36	0.00124751
0.44	0.00124751
0.52	0
0.6	0
0.68	0
0.76	0
0.84	0
0.92	0.00124751
1	0.00249501
1.08	0.00249501
1.16	0.00499002
1.24	0.00499002
1.32	0.012475
1.4	0.0224551
1.48	0.0399202
1.56	0.0623753
1.64	0.0848303
1.72	0.11477
1.8	0.153443
1.88	0.175898
1.96	0.200848
2.04	0.227046
2.12	0.238273
2.2	0.248253
2.28	0.254491
2.36	0.263224
2.44	0.279441
2.52	0.304391
2.6	0.330589
2.68	0.402944
2.76	0.494012
2.84	0.601297
2.92	0.688623
3	0.769711
3.08	0.813373
3.16	0.853293
3.24	0.847056
3.32	0.804641
3.4	0.747255
3.48	0.65993
3.56	0.542665
3.64	0.412924
3.72	0.306886
3.8	0.207086
3.88	0.139721
3.96	0.0698603
4.04	0.0374251
4.12	0.0237026
4.2	0.0149701
4.28	0.00748503
4.36	0.00623752
4.44	0.00249501
4.52	0.00249501
4.6	0.00124751
4.68	0.00124751
4.76	-1.97065e-16
4.84	-1.97065e-16
4.92	-1.97065e-16
5	-1.97065e-16
5.08	-1.97065e-16
5.16	-1.97065e-16
5.24	-1.97065e-16
5.32	-1.97065e-16
5.4	-1.97065e-16
5.48	-1.97065e-16
5.56	-1.97065e-16
5.64	-1.97065e-16
5.72	-1.97065e-16
5.8	-1.97065e-16
5.88	-1.97065e-16
5.96	-1.97065e-16
6.04	-1.97065e-16
6.12	-1.97065e-16
6.2	-1.97065e-16
6.28	-1.97065e-16
6.36	-1.97065e-16
6.44	-1.97065e-16
6.52	-1.97065e-16
6.6	-1.97065e-16
6.68	-1.97065e-16
6.76	-1.97065e-16
6.84	-1.97065e-16
6.92	-1.97065e-16
7	-1.97065e-16
7.08	-1.97065e-16
7.16	-1.97065e-16
7.24	-1.97065e-16
7.32	-1.97065e-16
7.4	-1.97065e-16
7.48	-1.97065e-16
7.56	-1.97065e-16
7.64	-1.97065e-16
(GU)6 – RRM12 Q213A
RMSD RNA	Probability
0.36	0.0024975
0.44	0.0024975
0.52	0.00499501
0.6	0.00624376
0.68	0.00749251
0.76	0.00999001
0.84	0.00874126
0.92	0.014985
1	0.0212288
1.08	0.0262238
1.16	0.02997
1.24	0.0412088
1.32	0.0524476
1.4	0.0711788
1.48	0.0811688
1.56	0.0986513
1.64	0.126124
1.72	0.153596
1.8	0.172328
1.88	0.191059
1.96	0.207293
2.04	0.208541
2.12	0.206044
2.2	0.188561
2.28	0.183566
2.36	0.164835
2.44	0.141109
2.52	0.113636
2.6	0.0999001
2.68	0.104895
2.76	0.124875
2.84	0.15984
2.92	0.18981
3	0.246004
3.08	0.310939
3.16	0.368382
3.24	0.42957
3.32	0.513237
3.4	0.553197
3.48	0.583167
3.56	0.608142
3.64	0.600649
3.72	0.589411
3.8	0.549451
3.88	0.504495
3.96	0.464535
4.04	0.418332
4.12	0.344655
4.2	0.310939
4.28	0.267233
4.36	0.211039
4.44	0.186064
4.52	0.167333
4.6	0.163586
4.68	0.143606
4.76	0.127373
4.84	0.10989
4.92	0.0999001
5	0.0861638
5.08	0.0736763
5.16	0.0661838
5.24	0.0511988
5.32	0.03996
5.4	0.024975
5.48	0.0187313
5.56	0.0162338
5.64	0.0137363
5.72	0.00749251
5.8	0.00374625
5.88	0.00124875
5.96	1.80411e-17
6.04	1.80411e-17
6.12	1.80411e-17
6.2	1.80411e-17
6.28	1.80411e-17
6.36	1.80411e-17
6.44	1.80411e-17
6.52	1.80411e-17
6.6	1.80411e-17
6.68	1.80411e-17
6.76	1.80411e-17
6.84	1.80411e-17
6.92	1.80411e-17
7	1.80411e-17
7.08	1.80411e-17
7.16	1.80411e-17
7.24	1.80411e-17
7.32	1.80411e-17
7.4	1.80411e-17
7.48	1.80411e-17
7.56	1.80411e-17
7.64	1.80411e-17
(GU)6 – RRM12 G146A
RMSD RNA	Probability
0.36	0.00249501
0.44	0.00249501
0.52	0.00249501
0.6	0.00374252
0.68	0.00374252
0.76	0.00374252
0.84	0.00249501
0.92	0.00249501
1	0.00249501
1.08	0.00374252
1.16	0.00499002
1.24	0.00623752
1.32	0.00623752
1.4	0.00499002
1.48	0.00499002
1.56	0.00623752
1.64	0.00623752
1.72	0.00748503
1.8	0.00873253
1.88	0.00998004
1.96	0.00873253
2.04	0.00748503
2.12	0.00748503
2.2	0.00873253
2.28	0.00873253
2.36	0.00748503
2.44	0.00623752
2.52	0.00499002
2.6	0.00623752
2.68	0.00873253
2.76	0.012475
2.84	0.0237026
2.92	0.0449102
3	0.0611277
3.08	0.0885729
3.16	0.122255
3.24	0.164671
3.32	0.208333
3.4	0.251996
3.48	0.303144
3.56	0.360529
3.64	0.436627
3.72	0.533932
3.8	0.662425
3.88	0.804641
3.96	0.919411
4.04	0.966816
4.12	0.969311
4.2	0.948104
4.28	0.908184
4.36	0.857036
4.44	0.772206
4.52	0.65494
4.6	0.508982
4.68	0.339321
4.76	0.190868
4.84	0.101048
4.92	0.0548902
5	0.0299401
5.08	0.0137226
5.16	0.00374252
5.24	0.00124751
5.32	-3.95517e-17
5.4	-3.95517e-17
5.48	-3.95517e-17
5.56	-3.95517e-17
5.64	-3.95517e-17
5.72	-3.95517e-17
5.8	-3.95517e-17
5.88	-3.95517e-17
5.96	-3.95517e-17
6.04	-3.95517e-17
6.12	-3.95517e-17
6.2	-3.95517e-17
6.28	-3.95517e-17
6.36	-3.95517e-17
6.44	-3.95517e-17
6.52	-3.95517e-17
6.6	-3.95517e-17
6.68	-3.95517e-17
6.76	-3.95517e-17
6.84	-3.95517e-17
6.92	-3.95517e-17
7	-3.95517e-17
7.08	-3.95517e-17
7.16	-3.95517e-17
7.24	-3.95517e-17
7.32	-3.95517e-17
7.4	-3.95517e-17
7.48	-3.95517e-17
7.56	-3.95517e-17
7.64	-3.95517e-17
(GU)6 – RRM12 T141A/G142A
RMSD RNA	Probability
0.36	0.00249501
0.44	0.00249501
0.52	0.00249501
0.6	0.00249501
0.68	0.00249501
0.76	0
0.84	0
0.92	0.00124751
1	0.00249501
1.08	0.00249501
1.16	0.00374252
1.24	0.00499002
1.32	0.00623752
1.4	0.00998004
1.48	0.0112275
1.56	0.0199601
1.64	0.0261976
1.72	0.0299401
1.8	0.0311876
1.88	0.0349301
1.96	0.0361776
2.04	0.0399202
2.12	0.0386727
2.2	0.0361776
2.28	0.0374251
2.36	0.0286926
2.44	0.0237026
2.52	0.0199601
2.6	0.0187126
2.68	0.0174651
2.76	0.0199601
2.84	0.0187126
2.92	0.0261976
3	0.0361776
3.08	0.0598802
3.16	0.0985529
3.24	0.140968
3.32	0.188373
3.4	0.245758
3.48	0.301896
3.56	0.373004
3.64	0.445359
3.72	0.531437
3.8	0.577595
3.88	0.613772
3.96	0.633733
4.04	0.64995
4.12	0.652445
4.2	0.636228
4.28	0.613772
4.36	0.566367
4.44	0.512725
4.52	0.440369
4.6	0.402944
4.68	0.356786
4.76	0.318114
4.84	0.278194
4.92	0.249501
5	0.215818
5.08	0.190868
5.16	0.172156
5.24	0.160928
5.32	0.149701
5.4	0.134731
5.48	0.133483
5.56	0.121008
5.64	0.107285
5.72	0.0910679
5.8	0.0848303
5.88	0.0748503
5.96	0.0698603
6.04	0.0611277
6.12	0.0536427
6.2	0.0499002
6.28	0.0349301
6.36	0.0274451
6.44	0.0212076
6.52	0.0149701
6.6	0.012475
6.68	0.0112275
6.76	0.00623752
6.84	0.00374252
6.92	0.00124751
7	-5.75928e-17
7.08	-5.75928e-17
7.16	-5.75928e-17
7.24	-5.75928e-17
7.32	-5.75928e-17
7.4	-5.75928e-17
7.48	-5.75928e-17
7.56	-5.75928e-17
7.64	-5.75928e-17
(GU)12 – RRM12 WT
RMSD RNA	Probability
0.36	0.00124875
0.44	0.00124875
0.52	0
0.6	0.00124875
0.68	0.00124875
0.76	0.00374625
0.84	0.00374625
0.92	0.00499501
1	0.00749251
1.08	0.0112388
1.16	0.01998
1.24	0.0287213
1.32	0.0312188
1.4	0.0337163
1.48	0.0374625
1.56	0.0387113
1.64	0.0424575
1.72	0.0536963
1.8	0.0599401
1.88	0.0724276
1.96	0.0774226
2.04	0.0836663
2.12	0.104895
2.2	0.121129
2.28	0.141109
2.36	0.171079
2.44	0.201049
2.52	0.232268
2.6	0.275974
2.68	0.292208
2.76	0.317183
2.84	0.344655
2.92	0.387113
3	0.440809
3.08	0.483267
3.16	0.515734
3.24	0.578172
3.32	0.666833
3.4	0.728022
3.48	0.79046
3.56	0.802947
3.64	0.777972
3.72	0.720529
3.8	0.649351
3.88	0.584416
3.96	0.519481
4.04	0.423327
4.12	0.290959
4.2	0.177323
4.28	0.0824176
4.36	0.0312188
4.44	0.0137363
4.52	0.00499501
4.6	0.0024975
4.68	0.00124875
4.76	-5.96745e-17
4.84	-5.96745e-17
4.92	-5.96745e-17
5	-5.96745e-17
5.08	-5.96745e-17
5.16	-5.96745e-17
5.24	-5.96745e-17
5.32	-5.96745e-17
5.4	-5.96745e-17
5.48	-5.96745e-17
5.56	-5.96745e-17
5.64	-5.96745e-17
5.72	-5.96745e-17
5.8	-5.96745e-17
5.88	-5.96745e-17
5.96	-5.96745e-17
6.04	-5.96745e-17
6.12	-5.96745e-17
6.2	-5.96745e-17
6.28	-5.96745e-17
6.36	-5.96745e-17
6.44	-5.96745e-17
6.52	-5.96745e-17
6.6	-5.96745e-17
6.68	-5.96745e-17
6.76	-5.96745e-17
6.84	-5.96745e-17
6.92	-5.96745e-17
7	-5.96745e-17
7.08	-5.96745e-17
7.16	-5.96745e-17
7.24	-5.96745e-17
7.32	-5.96745e-17
7.4	-5.96745e-17
7.48	-5.96745e-17
7.56	-5.96745e-17
7.64	-5.96745e-17
(GU)12 – RRM12 Q213A
RMSD RNA	Probability
0.36	0
0.44	0
0.52	0
0.6	0
0.68	0
0.76	0
0.84	0
0.92	0
1	0
1.08	0
1.16	0
1.24	0
1.32	0
1.4	0
1.48	0
1.56	0
1.64	0
1.72	0
1.8	0
1.88	0
1.96	0
2.04	0
2.12	0
2.2	0
2.28	0
2.36	0
2.44	0
2.52	0
2.6	0
2.68	0
2.76	0
2.84	0
2.92	0
3	0
3.08	0.00249501
3.16	0.00623752
3.24	0.0149701
3.32	0.0324351
3.4	0.0511477
3.48	0.0773453
3.56	0.122255
3.64	0.182136
3.72	0.254491
3.8	0.349301
3.88	0.436627
3.96	0.572605
4.04	0.702345
4.12	0.809631
4.2	0.919411
4.28	0.979291
4.36	0.998004
4.44	0.980539
4.52	0.936876
4.6	0.872006
4.68	0.792166
4.76	0.661178
4.84	0.53019
4.92	0.406687
5	0.279441
5.08	0.193363
5.16	0.129741
5.24	0.0873253
5.32	0.0586327
5.4	0.0286926
5.48	0.0187126
5.56	0.00998004
5.64	0.00249501
5.72	0.00124751
5.8	-1.4988e-16
5.88	-1.4988e-16
5.96	-1.4988e-16
6.04	-1.4988e-16
6.12	-1.4988e-16
6.2	-1.4988e-16
6.28	-1.4988e-16
6.36	-1.4988e-16
6.44	-1.4988e-16
6.52	-1.4988e-16
6.6	-1.4988e-16
6.68	-1.4988e-16
6.76	-1.4988e-16
6.84	-1.4988e-16
6.92	-1.4988e-16
7	-1.4988e-16
7.08	-1.4988e-16
7.16	-1.4988e-16
7.24	-1.4988e-16
7.32	-1.4988e-16
7.4	-1.4988e-16
7.48	-1.4988e-16
7.56	-1.4988e-16
7.64	-1.4988e-16
(GU)12 – RRM12 G146A
RMSD RNA	Probability
0.36	0
0.44	0
0.52	0
0.6	0
0.68	0
0.76	0
0.84	0
0.92	0
1	0
1.08	0
1.16	0
1.24	0
1.32	0
1.4	0
1.48	0
1.56	0
1.64	0
1.72	0
1.8	0
1.88	0
1.96	0
2.04	0
2.12	0
2.2	0
2.28	0
2.36	0
2.44	0
2.52	0
2.6	0
2.68	0
2.76	0
2.84	0.00249501
2.92	0.00998004
3	0.0162176
3.08	0.0424152
3.16	0.0898204
3.24	0.192116
3.32	0.346806
3.4	0.503992
3.48	0.68987
3.56	0.838323
3.64	0.960579
3.72	1.03917
3.8	1.09656
3.88	1.12151
3.96	1.09905
4.04	1.01796
4.12	0.874501
4.2	0.726048
4.28	0.547655
4.36	0.401697
4.44	0.279441
4.52	0.195858
4.6	0.135978
4.68	0.0860778
4.76	0.0611277
4.84	0.0399202
4.92	0.0286926
5	0.0199601
5.08	0.012475
5.16	0.00998004
5.24	0.00748503
5.32	0.00499002
5.4	0.00124751
5.48	-2.08167e-17
5.56	-2.08167e-17
5.64	-2.08167e-17
5.72	-2.08167e-17
5.8	-2.08167e-17
5.88	-2.08167e-17
5.96	-2.08167e-17
6.04	-2.08167e-17
6.12	-2.08167e-17
6.2	-2.08167e-17
6.28	-2.08167e-17
6.36	-2.08167e-17
6.44	-2.08167e-17
6.52	-2.08167e-17
6.6	-2.08167e-17
6.68	-2.08167e-17
6.76	-2.08167e-17
6.84	-2.08167e-17
6.92	-2.08167e-17
7	-2.08167e-17
7.08	-2.08167e-17
7.16	-2.08167e-17
7.24	-2.08167e-17
7.32	-2.08167e-17
7.4	-2.08167e-17
7.48	-2.08167e-17
7.56	-2.08167e-17
7.64	-2.08167e-17
(GU)12 – RRM12 T141A/G146A
RMSD RNA	Probability
0.36	0
0.44	0
0.52	0
0.6	0
0.68	0
0.76	0
0.84	0
0.92	0
1	0
1.08	0
1.16	0
1.24	0
1.32	0
1.4	0
1.48	0
1.56	0
1.64	0
1.72	0
1.8	0
1.88	0
1.96	0
2.04	0
2.12	0
2.2	0
2.28	0
2.36	0
2.44	0
2.52	0
2.6	0
2.68	0
2.76	0
2.84	0.00124751
2.92	0.00623752
3	0.0162176
3.08	0.0261976
3.16	0.0399202
3.24	0.0648703
3.32	0.106038
3.4	0.165918
3.48	0.239521
3.56	0.316866
3.64	0.444112
3.72	0.55514
3.8	0.65993
3.88	0.758483
3.96	0.854541
4.04	0.918164
4.12	0.945609
4.2	0.943114
4.28	0.913174
4.36	0.869511
4.44	0.760978
4.52	0.65993
4.6	0.553892
4.68	0.455339
4.76	0.351796
4.84	0.264471
4.92	0.195858
5	0.140968
5.08	0.0973054
5.16	0.0636228
5.24	0.0436627
5.32	0.0286926
5.4	0.0199601
5.48	0.00998004
5.56	0.00374252
5.64	0.00249501
5.72	0.00249501
5.8	-2.22045e-17
5.88	-2.22045e-17
5.96	-2.22045e-17
6.04	-2.22045e-17
6.12	-2.22045e-17
6.2	-2.22045e-17
6.28	-2.22045e-17
6.36	-2.22045e-17
6.44	-2.22045e-17
6.52	-2.22045e-17
6.6	-2.22045e-17
6.68	-2.22045e-17
6.76	-2.22045e-17
6.84	-2.22045e-17
6.92	-2.22045e-17
7	-2.22045e-17
7.08	-2.22045e-17
7.16	-2.22045e-17
7.24	-2.22045e-17
7.32	-2.22045e-17
7.4	-2.22045e-17
7.48	-2.22045e-17
7.56	-2.22045e-17
7.64	-2.22045e-17
(GU)12 – RRM12 WT
DE	Probability
-815.01	0
-810.229	0
-805.449	0
-800.669	0
-795.889	0
-791.109	0
-786.329	0
-781.549	0
-776.769	0
-771.989	0
-767.208	0
-762.428	0
-757.648	0
-752.868	0
-748.088	0
-743.308	0
-738.528	0
-733.748	0
-728.967	0
-724.187	0
-719.407	0
-714.627	0
-709.847	9.999e-07
-705.067	1.9998e-06
-700.287	2.49975e-06
-695.507	3.49965e-06
-690.727	4.9995e-06
-685.946	9.999e-06
-681.166	1.79982e-05
-676.386	3.39966e-05
-671.606	5.54945e-05
-666.826	9.34907e-05
-662.046	0.000133487
-657.266	0.00020398
-652.486	0.000287971
-647.706	0.000386461
-642.925	0.000509949
-638.145	0.000643436
-633.365	0.000785921
-628.585	0.000938906
-623.805	0.00109689
-619.025	0.00126087
-614.245	0.00141536
-609.465	0.00156284
-604.685	0.00168783
-599.904	0.00179632
-595.124	0.00187331
-590.344	0.0019523
-585.564	0.0020073
-580.784	0.0020258
-576.004	0.0020493
-571.224	0.0020398
-566.444	0.0020348
-561.663	0.0019808
-556.883	0.0019563
-552.103	0.00192081
-547.323	0.00188681
-542.543	0.00181782
-537.763	0.00173733
-532.983	0.00166783
-528.203	0.00154984
-523.423	0.00143386
-518.642	0.00130437
-513.862	0.00118488
-509.082	0.0010339
-504.302	0.000875912
-499.522	0.000717928
-494.742	0.000573943
-489.962	0.000449955
-485.182	0.000332967
-480.402	0.000248475
-475.621	0.000171983
-470.841	0.000110989
-466.061	6.54935e-05
-461.281	3.14969e-05
-456.501	1.69983e-05
-451.721	6.9993e-06
-446.941	2.49975e-06
-442.161	1.49985e-06
-437.38	4.9995e-07
-432.6	-4.5672e-19
-427.82	-4.5672e-19
-423.04	-4.5672e-19
-418.26	-4.5672e-19
-413.48	-4.5672e-19
-408.7	-4.5672e-19
-403.92	-4.5672e-19
-399.14	-4.5672e-19
-394.359	-4.5672e-19
-389.579	-4.5672e-19
-384.799	-4.5672e-19
-380.019	-4.5672e-19
(GU)12 – RRM12 Q213A
DE	Probability
-815.01	0
-810.229	0
-805.449	0
-800.669	0
-795.889	0
-791.109	0
-786.329	0
-781.549	0
-776.769	0
-771.989	0
-767.208	0
-762.428	0
-757.648	0
-752.868	0
-748.088	4.9995e-07
-743.308	4.49955e-06
-738.528	1.54985e-05
-733.748	2.74972e-05
-728.967	4.49955e-05
-724.187	6.89931e-05
-719.407	0.000113489
-714.627	0.000164484
-709.847	0.000243476
-705.067	0.000342966
[truncated: 256 more rows]
