# Supplementary material for: The cooperative binding of TDP-43 to GU-rich RNA repeats antagonizes TDP-43 aggregation
Source: eLife. 2021 Sep 7;10:e67605. doi: 10.7554/eLife.67605 (PMC8523171; doi:10.7554/eLife.67605)
Supplement: Figure 4—source data 4. [file elife-67605-fig4-data4.xlsx]

## Sheet: Fig 4b  
	WT RRM1-2 free		WT RRM1-2 + (GU)6				Q213A free		Q213A + (GU)6				G146A free		G146A + (GU)6				T141AG142A free		T141AG142A + (GU)6
Residue #	1H [ppm]	15N [ppm]	1H [ppm]	15N [ppm]	CSP		1H [ppm]	15N [ppm]	1H [ppm]	15N [ppm]	CSP		1H [ppm]	15N [ppm]	1H [ppm]	15N [ppm]	CSP		1H [ppm]	15N [ppm]	1H [ppm]	15N [ppm]	CSP
104	8.5734	114.568	8.6291	114.39	0.0584238		8.5733	114.56	8.6291	114.39	0.058294		8.5794	114.697	8.621	114.441	0.0487064		8.5394	114.6	8.6192	114.412	0.081928
105	8.401	123.114	8.8219	123.781	0.426045		8.4029	123.11	8.8285	123.761	0.430455		8.3822	123.144	8.7777	123.937	0.40321		8.3676	123.19	8.8219	123.781	0.458045
106	9.1516	121.941	9.183	121.876	0.0320645		9.1551	121.971	9.1814	121.839	0.0293586		9.1317	121.99	9.1972	121.668	0.0728577		9.1313	122.619	9.1846	121.77	0.0994975
107	9.1428	121.501	8.9244	122.292	0.232027		9.1374	121.477	8.9234	122.257	0.227505		9.1209	121.751	8.9498	122.128	0.17511		9.1233	121.879	8.9355	122.299	0.192341
108	8.7064	127.527	8.4599	127.181	0.248857		8.7124	127.534	8.4664	127.16	0.24876		8.7294	127.365	8.486	127.286	0.243526		8.6862	126.918	8.4695	127.264	0.219378
109	8.9426	125.88	8.8926	125.924	0.0501937		8.9426	125.901	8.8959	125.915	0.0467197		8.7587	125.974	8.8439	125.55	0.0949869		0	0	8.8965	125.918	0
110	8.5532	107.558	7.9762	106.904	0.580622		8.5557	107.573	7.9768	106.936	0.58233		0	0	7.9415	107.36	0		8.523	109.096	7.929	107.018	0.628599
113	8.1118	122.069	7.2714	123.297	0.849145		8.1118	122.069	7.2714	123.297	0.849145		8.1251	121.751	0	0	0		8.0872	122.025	7.3066	123.193	0.789116
128	7.5768	105.779	7.591	105.66	0.0184567		7.5773	105.776	7.595	105.678	0.0201749		7.5621	105.72	7.5707	105.67	0.00995745		7.5531	105.715	7.5811	105.648	0.028784
137	8.4014	122.788	8.5102	122.544	0.111455		8.401	122.794	8.5105	122.524	0.112699		8.3876	122.822	8.4905	122.409	0.110732		8.4496	122.859	8.495	122.52	0.0564275
145	8.9404	123.353	9.2218	124.046	0.289637		8.9435	123.382	9.223	124.001	0.286143		8.5253	122.876	9.0094	124.173	0.500853		9.0145	120.68	9.1434	125.049	0.451327
147	7.3741	112.649	7.2095	111.72	0.188525		7.3765	112.636	7.2113	111.721	0.188422		7.3142	112.649	0	0	0		7.3521	112.637	7.2036	111.8	0.170052
148	8.6046	107.027	8.3677	106.966	0.236978		8.6047	107.01	8.3646	106.925	0.240248		8.7474	108.635	8.3385	107.074	0.437122		8.6073	108.185	8.3278	106.895	0.307309
149	9.1674	116.494	9.1802	115.822	0.0676865		9.1699	116.489	9.1823	115.788	0.0704264		9.1848	116.461	9.1715	116.152	0.0333103		9.1821	116.382	9.2191	115.877	0.062235
150	8.8156	116.829	8.815	116.239	0.0584101		8.8156	116.829	8.8152	116.242	0.0581015		8.8375	116.368	8.7848	116.448	0.0533036		8.8322	116.46	8.8079	116.32	0.0279646
170	7.8373	100.665	7.6078	100.455	0.230443		7.84	100.689	7.6168	100.449	0.224466		7.9417	100.982	7.7019	100.683	0.241624		7.8861	100.748	7.6048	100.403	0.283366
171	7.6461	121.574	7.5317	121.935	0.119852		7.6498	121.585	7.5362	121.921	0.118386		7.6466	121.305	7.6029	121.901	0.0734301		7.6304	121.376	7.5223	121.822	0.116735
172	8.5257	121.706	8.2401	122.272	0.291054		8.5263	121.712	8.2366	122.213	0.293918		8.5794	121.917	8.2058	122.366	0.376232		8.56	121.894	8.2401	122.272	0.322081
173	10.0041	123.914	9.6152	121.082	0.479429		10.0061	123.933	9.6203	121.097	0.477122		9.9751	123.174	9.6287	121.14	0.400716		9.9661	123.399	9.6059	121.098	0.426187
174	8.0459	119.703	8.0549	119.587	0.014629		8.0439	119.735	8.0549	119.587	0.0183606		7.8705	119.349	8.0964	119.434	0.226057		8.0052	119.879	8.0549	119.587	0.0575249
175	9.512	119.646	9.5497	120.48	0.090735		9.5125	119.623	9.5469	120.433	0.0872624		9.5757	119.732	9.5374	120.11	0.0535873		9.5436	119.686	9.5474	120.374	0.0681848
176	9.0301	121.71	8.8533	121.671	0.176844		9.0301	121.71	8.8485	121.697	0.181605		9.0722	121.637	8.871	121.579	0.201283		9.064	121.62	8.8418	121.668	0.222251
177	8.6662	122.889	8.7025	122.856	0.0364458		8.6722	122.908	8.7025	122.856	0.0307292		8.6174	122.643	8.6953	122.753	0.078667		8.6032	122.603	8.7025	122.856	0.102407
179	8.6297	118.832	8.2285	121.055	0.457616		8.6301	118.8	8.2286	121.054	0.459304		8.6601	118.637	8.2225	121.017	0.497005		8.6087	118.669	8.2238	121.089	0.453366
180	8.5412	116.411	8.6774	117.192	0.156609		8.542	116.345	8.6802	117.169	0.160508		8.5282	116.341	8.6728	116.995	0.158432		8.5112	116.375	8.6734	117.112	0.177858
190	7.8966	118.826	7.8665	118.799	0.0302167		7.8966	118.826	7.8646	118.814	0.0320232		7.9032	118.602	7.8918	118.926	0.0340027		7.8599	118.678	7.8624	118.704	0.00358815
192	8.8077	127.342	8.1831	120.682	0.908205		8.8152	127.42	8.1831	120.682	0.918976		8.8069	127.239	8.1831	120.682	0.900304		8.8018	127.297	8.1831	120.682	0.900907
193	9.1385	117.643	9.002	114.989	0.296102		9.1365	117.712	9.0123	114.904	0.304426		9.1364	117.705	9.0184	115.182	0.276254		9.1172	117.525	9.002	114.989	0.276247
194	9.0743	122.768	8.8701	124.096	0.242886		9.0724	122.706	8.8651	124.01	0.244213		9.0795	122.716	8.9014	124.209	0.231446		9.0699	122.801	8.8552	124.036	0.247045
196	9.4092	113.328	9.1133	112.17	0.317316		9.4107	113.361	9.119	112.193	0.31377		9.4183	113.346	9.113	112.322	0.321708		9.3945	113.326	9.1197	112.24	0.295064
197	8.3217	111.381	8.3934	110.608	0.104908		8.3167	111.352	8.3934	110.608	0.10633		8.326	111.377	8.3914	110.611	0.100122		8.3176	111.373	8.3865	110.605	0.102596
198	7.1973	113.602	7.1723	114.095	0.054835		7.1973	113.602	7.1569	114.025	0.0581366		7.2007	113.623	7.1581	114.027	0.0584183		7.1923	113.619	7.1405	114.077	0.0688529
220	8.0178	121.299	8.1007	121.675	0.0908527		8.0171	121.275	8.1007	121.675	0.0925038		8.0195	121.292	8.1651	121.668	0.15029		8.0115	121.191	8.0567	121.592	0.060118
221	8.9728	125.489	8.8949	127.466	0.210637		8.9739	125.521	8.9034	127.516	0.20972		8.9753	125.501	8.9088	127.491	0.207893		8.9743	125.545	8.8988	127.528	0.210334
222	8.8603	129.378	8.3772	128.392	0.49286		8.8691	129.357	8.369	128.406	0.50887		8.8511	129.389	8.3849	128.404	0.476297		8.8306	129.334	8.3547	128.388	0.485038
226	8.7895	122.032	8.3093	119.362	0.548152		8.7868	122.066	8.3134	119.367	0.543572		8.7863	122.017	8.2935	119.255	0.563586		8.7736	122.002	8.3093	119.362	0.532806
227	8.6474	127.564	8.4672	124.389	0.362301		8.6517	127.54	8.4672	124.389	0.362463		8.6501	127.558	8.5118	124.809	0.305228		8.6253	127.575	8.5017	124.359	0.341436
230	8.3646	119.552	7.9634	118.224	0.422187		8.3518	119.442	7.9661	118.209	0.404568		8.3447	119.45	7.971	118.249	0.392178		8.3642	119.181	7.9459	118.236	0.428631
231	9.1858	116.271	8.9503	113.573	0.356077		9.1913	116.301	8.955	113.608	0.356214		9.1972	116.261	9.0106	114.046	0.287962		9.1826	116.197	8.9378	113.629	0.352915
232	8.7005	123.631	8.7356	124.8	0.120865		8.6977	123.661	8.7213	124.753	0.110687		8.7009	123.626	8.7201	124.871	0.124823		8.6901	123.561	8.7541	124.811	0.139314
253	8.1654	124.586	7.8946	123.113	0.307579		8.1644	124.587	7.8981	123.115	0.303548		8.1644	124.593	7.899	123.083	0.304611		8.1512	124.58	7.8917	123.04	0.300983
254	8.224	119.077	7.8651	117.159	0.406058		8.224	119.077	7.8446	117.087	0.427487		8.2757	119.009	7.8713	117.059	0.448137		8.309	118.96	7.8651	117.159	0.478403
255	9.4698	126.092	9.3945	126.91	0.110622		9.4567	126.11	9.3904	126.938	0.10544		9.4713	126.122	9.3886	126.65	0.0978228		9.4485	125.993	9.3945	126.91	0.105608
257	8.3455	129.617	8.1048	128.214	0.277917		8.3551	129.661	8.107	128.215	0.286434		8.3317	129.576	8.2268	128.239	0.168908		8.3334	129.596	8.109	128.167	0.2653
258	9.5571	120.903	9.4993	121.551	0.0863917		9.5527	120.819	9.5077	121.563	0.0863198		9.5653	120.914	9.5118	121.541	0.0819521		9.5436	120.944	9.4993	121.551	0.0746704
259	8.8076	118.917	8.6039	118.23	0.214731		8.8084	118.857	8.604	118.219	0.213938		8.8043	118.923	8.594	118.323	0.218527		8.7924	118.991	8.6091	118.228	0.198283
260	8.0111	122.982	8.828	124.672	0.833848		8.0111	122.982	0	0	0		8.0072	122.936	8.907	124.669	0.916011		8.0111	122.982	8.8437	124.632	0.848469
261	8.3312	122.108	8.5758	126.573	0.505203		8.3528	122.081	8.5779	126.546	0.496047		8.3429	122.063	8.5175	126.188	0.444088		8.334	122.025	8.5647	126.582	0.506731
263	8.259	120.997	8.337	121.418	0.0884175		8.2515	121.131	8.337	121.418	0.0900783		8.2577	121.138	8.3394	121.385	0.0852749		8.244	121.074	8.337	121.418	0.0990286
265	8.2132	125.298	8.1538	124.978	0.0673146		8.2132	125.298	8.1538	124.978	0.0673146		8.1626	125.424	8.1809	125.083	0.0383637		8.1817	125.321	8.1775	124.93	0.038885
