# Supplementary material for: The cooperative binding of TDP-43 to GU-rich RNA repeats antagonizes TDP-43 aggregation
Source: eLife. 2021 Sep 7;10:e67605. doi: 10.7554/eLife.67605 (PMC8523171; doi:10.7554/eLife.67605)
Supplement: Figure 5—figure supplement 1—source data 1. [file elife-67605-fig5-figsupp1-data1.xlsx]

## Sheet: RRM1-2 alone
RRM1-2 alone
q	I(q)	sd				Figure 5-figure supplement 8a
0.00912198	0.474509	0.00803569
0.00962876	0.466931	0.00756537
0.0101355	0.458917	0.00695527
0.0106423	0.460348	0.00672951
0.0111491	0.467388	0.00614724
0.0116559	0.459079	0.00613273
0.0121626	0.459513	0.00579759
0.0126694	0.450583	0.00541977
0.0131762	0.467646	0.00536689
0.013683	0.454544	0.00507968
0.0141897	0.463786	0.00518483
0.0146965	0.460307	0.00481412
0.0152033	0.462546	0.00471515
0.0157101	0.463666	0.00462647
0.0162168	0.459057	0.00445855
0.0167236	0.454467	0.00444919
0.0172304	0.465261	0.00422103
0.0177371	0.460405	0.00417852
0.0182439	0.447733	0.0041511
0.0187507	0.444149	0.00398521
0.0192575	0.449122	0.00399141
0.0197642	0.448226	0.00380171
0.020271	0.446651	0.00386973
0.0207778	0.440209	0.0037195
0.0212845	0.44115	0.00367259
0.0217913	0.444682	0.00362627
0.0222981	0.43905	0.00352108
0.0228049	0.442021	0.00359535
0.0233116	0.440637	0.00342426
0.0238184	0.431885	0.00343214
0.0243252	0.434781	0.00337104
0.0248319	0.437387	0.00329769
0.0253387	0.436155	0.00329199
0.0258455	0.432919	0.00321277
0.0263522	0.429727	0.00322489
0.026859	0.421268	0.00315417
0.0273658	0.421514	0.00326289
0.0278725	0.431554	0.00325709
0.0283793	0.42916	0.00319909
0.0288861	0.415175	0.00328174
0.0293928	0.415053	0.00314974
0.0298996	0.41548	0.00325726
0.0304063	0.414554	0.00318813
0.0309131	0.413735	0.00315457
0.0314199	0.405909	0.00322861
0.0319266	0.408079	0.00308411
0.0324334	0.408169	0.00321548
0.0329402	0.40139	0.00309702
0.0334469	0.393187	0.00308387
0.0339537	0.396119	0.00310075
0.0344604	0.399144	0.0030294
0.0349672	0.398091	0.00310294
0.0354739	0.392098	0.00302682
0.0359807	0.390167	0.00304194
0.0364875	0.391709	0.00303762
0.0369942	0.378947	0.00292341
0.037501	0.386936	0.00303801
0.0380077	0.380915	0.0029054
0.0385145	0.379183	0.00295935
0.0390212	0.375466	0.00293438
0.039528	0.372725	0.00289331
0.0400347	0.370237	0.00294099
0.0405415	0.372178	0.00286394
0.0410482	0.370429	0.00287343
0.041555	0.3617	0.00285784
0.0420618	0.363312	0.00285623
0.0425685	0.364188	0.00282243
0.0430752	0.353104	0.00279798
0.043582	0.359975	0.00279186
0.0440887	0.353178	0.00280892
0.0445955	0.350268	0.00275983
0.0451022	0.347156	0.00275425
0.045609	0.344927	0.00272615
0.0461157	0.348097	0.00273738
0.0466225	0.341069	0.00270593
0.0471292	0.335108	0.00271376
0.047636	0.337195	0.00269191
0.0481427	0.335958	0.00267042
0.0486494	0.330696	0.00266361
0.0491562	0.327347	0.00262007
0.0496629	0.32359	0.00265771
0.0501697	0.325022	0.00258877
0.0506764	0.324123	0.00263574
0.0511831	0.319786	0.00260274
0.0516899	0.318746	0.00257734
0.0521966	0.317184	0.00258171
0.0527033	0.313713	0.00255905
0.0532101	0.309658	0.00257724
0.0537168	0.302992	0.0025208
0.0542235	0.30365	0.00250345
0.0547303	0.299034	0.00253561
0.055237	0.297949	0.00248609
0.0557437	0.295197	0.00251404
0.0562505	0.298127	0.00247204
0.0567572	0.292236	0.00247279
0.0572639	0.287237	0.0024697
0.0577706	0.282333	0.00242096
0.0582774	0.289591	0.00245137
0.0587841	0.280652	0.00240705
0.0592908	0.278762	0.00242836
0.0597975	0.278506	0.00240242
0.0603043	0.272848	0.00238805
0.060811	0.276068	0.00238614
0.0613177	0.268833	0.00237728
0.0618244	0.261714	0.00235154
0.0623311	0.263551	0.00235336
0.0628379	0.259785	0.0023343
0.0633446	0.261334	0.00233271
0.0638513	0.257567	0.00232548
0.064358	0.25503	0.00233306
0.0648647	0.25086	0.00227535
0.0653714	0.247558	0.00231738
0.0658781	0.252077	0.00228928
0.0663848	0.24305	0.00226362
0.0668916	0.245087	0.00227745
0.0673983	0.236703	0.00223508
0.067905	0.237221	0.0022657
0.0684117	0.240879	0.00224101
0.0689184	0.235201	0.00223643
0.0694251	0.228342	0.00222331
0.0699318	0.228475	0.00221117
0.0704385	0.231338	0.00220968
0.0709452	0.223322	0.00219434
0.0714519	0.224713	0.00217986
0.0719586	0.220128	0.00220086
0.0724653	0.21945	0.00216288
0.072972	0.217722	0.00218222
0.0734787	0.213375	0.00213717
0.0739854	0.211356	0.00214089
0.0744921	0.209093	0.00214735
0.0749987	0.205589	0.00211939
0.0755054	0.204195	0.00212277
0.0760121	0.202044	0.0021099
0.0765188	0.201516	0.00213818
0.0770255	0.200337	0.00208555
0.0775322	0.196234	0.00210289
0.0780389	0.194558	0.00208582
0.0785455	0.189589	0.00207963
0.0790522	0.190989	0.00212044
0.0795589	0.187468	0.00211347
0.0800656	0.182712	0.00216993
0.0805723	0.183926	0.00218383
0.0810789	0.183571	0.00217085
0.0815856	0.180981	0.00219251
0.0820923	0.179208	0.00213988
0.082599	0.180043	0.00218954
0.0831056	0.177864	0.00217455
0.0836123	0.173823	0.00216919
0.084119	0.176938	0.0021763
0.0846256	0.165898	0.00213934
0.0851323	0.166837	0.00218772
0.085639	0.167478	0.00214882
0.0861456	0.165364	0.00216748
0.0866523	0.165626	0.00214987
0.087159	0.164204	0.00215021
0.0876656	0.159506	0.00216637
0.0881723	0.156589	0.00212803
0.0886789	0.15836	0.0021529
0.0891856	0.149707	0.00214637
0.0896922	0.155189	0.00214778
0.0901989	0.151422	0.00214646
0.0907055	0.148766	0.00210574
0.0912122	0.148685	0.00213475
0.0917188	0.143146	0.0021192
0.0922255	0.140806	0.00212069
0.0927321	0.143344	0.00211436
0.0932388	0.138027	0.0021125
0.0937454	0.138733	0.00212431
0.0942521	0.138645	0.00208978
0.0947587	0.138603	0.00210251
0.0952653	0.13947	0.00211005
0.095772	0.136931	0.00209143
0.0962786	0.131268	0.00210638
0.0967852	0.131977	0.0020827
0.0972919	0.129899	0.00209051
0.0977985	0.12724	0.00208974
0.0983051	0.128495	0.00208783
0.0988118	0.122314	0.00207626
0.0993184	0.124064	0.00204439
0.099825	0.119242	0.00208156
0.100332	0.117438	0.00205363
0.100838	0.120573	0.00207249
0.101345	0.122137	0.00206
0.101851	0.114977	0.00204111
0.102358	0.117625	0.00208586
0.102865	0.11217	0.00202931
0.103371	0.113258	0.00212935
0.103878	0.111708	0.00214193
0.104385	0.109329	0.00218742
0.104891	0.109596	0.00221104
0.105398	0.104094	0.00221112
0.105904	0.103761	0.00223629
0.106411	0.105918	0.00225049
0.106918	0.109368	0.00228099
0.107424	0.101396	0.00228981
0.107931	0.0975779	0.00227849
0.108437	0.101794	0.00232884
0.108944	0.0985642	0.00229759
0.109451	0.0969762	0.00236163
0.109957	0.092432	0.00231825
0.110464	0.0939439	0.0023532
0.11097	0.0911563	0.00239503
0.111477	0.0934558	0.00235586
0.111984	0.0938693	0.00240667
0.11249	0.0879157	0.00238618
0.112997	0.0873409	0.00231498
0.113503	0.0894889	0.00226017
0.11401	0.0862775	0.00224144
0.114516	0.0889583	0.00221431
0.115023	0.0873502	0.00218307
0.11553	0.0851919	0.00217149
0.116036	0.08561	0.00216844
0.116543	0.0841486	0.00215414
0.117049	0.0789806	0.00215621
0.117556	0.0827937	0.0021192
0.118062	0.0815664	0.00213679
0.118569	0.0849887	0.00210594
0.119076	0.0808243	0.00211392
0.119582	0.0787482	0.00209135
0.120089	0.0774899	0.00209549
0.120595	0.0712185	0.00209513
0.121102	0.0778046	0.0020594
0.121608	0.0701836	0.00207488
0.122115	0.0766141	0.002064
0.122621	0.0732889	0.00205229
0.123128	0.0696961	0.00206188
0.123634	0.072267	0.00203132
0.124141	0.0729058	0.00204713
0.124648	0.0680961	0.00201552
0.125154	0.0659925	0.0020228
0.125661	0.0688562	0.0020273
0.126167	0.0634343	0.00201963
0.126674	0.0658106	0.00202311
0.12718	0.0699578	0.00199062
0.127687	0.0633194	0.00200436
0.128193	0.0603039	0.00199588
0.1287	0.062977	0.00198929
0.129206	0.0627209	0.00198427
0.129713	0.0626962	0.00197466
0.130219	0.0601611	0.00198006
0.130726	0.0617049	0.00196523
0.131232	0.0610501	0.00196119
0.131739	0.0564254	0.00194926
0.132245	0.0604037	0.00193486
0.132752	0.0609845	0.00194613
0.133258	0.0550165	0.00191698
0.133765	0.0565672	0.00192844
0.134271	0.0531579	0.00191498
0.134778	0.0535996	0.00190608
0.135284	0.0535931	0.00191116
0.135791	0.057507	0.00187019
0.136297	0.055464	0.00189449
0.136804	0.0497731	0.00188034
0.13731	0.0556372	0.00187188
0.137817	0.0523136	0.00187743
0.138323	0.0539994	0.00185084
0.13883	0.0461708	0.00188071
0.139336	0.0481014	0.00184375
0.139843	0.0501773	0.001862
0.140349	0.0510608	0.00184976
0.140856	0.0470077	0.00184835
0.141362	0.0489266	0.00185539
0.141869	0.0464031	0.0018386
0.142375	0.0494493	0.0018396
0.142882	0.0453021	0.00184545
0.143388	0.0439484	0.00184246
0.143894	0.0461998	0.00183936
0.144401	0.0433232	0.00181206
0.144907	0.0438208	0.00182414
0.145414	0.04544	0.00183462
0.14592	0.0415573	0.00182211
0.146427	0.041424	0.00181083
0.146933	0.0409424	0.00181355
0.14744	0.043627	0.00181959
0.147946	0.0433479	0.00181425
0.148453	0.0391999	0.00179654
0.148959	0.0400104	0.00179805
0.149465	0.040494	0.00180764
0.149972	0.0445514	0.00180648
0.150478	0.0379844	0.00179979
0.150985	0.0373166	0.00178535
0.151491	0.0396905	0.00179396
0.151998	0.0379836	0.00179666
0.152504	0.0387537	0.00178412
0.15301	0.0363106	0.00177875
0.153517	0.0344056	0.00178075
0.154023	0.0379617	0.00178541
0.15453	0.0380785	0.00177624
0.155036	0.0394029	0.00177225
0.155542	0.0372257	0.00176684
0.156049	0.0377513	0.00177787
0.156555	0.0345756	0.00175754
0.157062	0.0325886	0.00176227
0.157568	0.0302887	0.00176165
0.158074	0.0353717	0.00176029
0.158581	0.0343391	0.00176469
0.159087	0.0318531	0.00174402
0.159594	0.030498	0.00174891
0.1601	0.0331736	0.00175036
0.160606	0.0309892	0.00175082
0.161113	0.0314165	0.00174403
0.161619	0.0330202	0.00173494
0.162125	0.0302049	0.00175418
0.162632	0.0342566	0.00174247
0.163138	0.0340345	0.00174367
0.163645	0.0273764	0.00172428
0.164151	0.0293458	0.00173494
0.164657	0.0290183	0.00174081
0.165164	0.0286611	0.0017086
0.16567	0.0266856	0.00171748
0.166176	0.0300371	0.00171251
0.166683	0.0304509	0.00173501
0.167189	0.0302959	0.00172518
0.167695	0.0250698	0.00170677
0.168202	0.0296041	0.00171476
0.168708	0.0318489	0.00171216
0.169214	0.0287321	0.00171667
0.169721	0.0260794	0.00170508
0.170227	0.0262691	0.00170313
0.170733	0.0263753	0.00170709
0.17124	0.0254755	0.00169819
0.171746	0.0228235	0.00169868
0.172252	0.0256914	0.00168384
0.172759	0.0244882	0.00169699
0.173265	0.023665	0.00170212
0.173771	0.0237513	0.00167746
0.174278	0.0220791	0.00168778
0.174784	0.0251542	0.00167592
0.17529	0.0262209	0.00169466
0.175797	0.0262874	0.00167897
0.176303	0.0224279	0.00168187
0.176809	0.0206512	0.00168049
0.177315	0.0234433	0.00166918
0.177822	0.0234816	0.00167769
0.178328	0.0239018	0.00167333
0.178834	0.0224642	0.00166056
0.179341	0.0237822	0.00167903
0.179847	0.0231983	0.00166045
0.180353	0.0234318	0.00167596
0.180859	0.021632	0.00165215
0.181366	0.0200512	0.00166102
0.181872	0.0260813	0.00167497
0.182378	0.0228091	0.00169327
0.182885	0.0230732	0.00174794
0.183391	0.0197634	0.00174161
0.183897	0.0215678	0.00179213
0.184403	0.0195454	0.00178058
0.18491	0.0206312	0.00173056
0.185416	0.0162567	0.00170837
0.185922	0.0198527	0.00168312
0.186428	0.017799	0.00167253
0.186935	0.0184868	0.00167222
0.187441	0.0186655	0.00166226
0.187947	0.0190569	0.00166881
0.188453	0.0197173	0.00165348
0.188959	0.0173986	0.00166153
0.189466	0.0181744	0.00163906
0.189972	0.015729	0.00165393
0.190478	0.0181141	0.00164565
0.190984	0.0166161	0.00163996
0.191491	0.0168673	0.00164601
0.191997	0.0180329	0.00163376
0.192503	0.0167164	0.0016425
0.193009	0.0170231	0.00163342
0.193515	0.0167439	0.00163166
0.194022	0.014902	0.00163131
0.194528	0.0163694	0.00162333
0.195034	0.0169864	0.00162766
0.19554	0.017975	0.00162071
0.196046	0.0163277	0.00162065
0.196553	0.0152288	0.00162417
0.197059	0.0159119	0.0016124
0.197565	0.0131098	0.00161597
0.198071	0.0151441	0.00160275
0.198577	0.0154824	0.00162029
0.199083	0.0153746	0.00161273
0.19959	0.0147651	0.00160006
0.200096	0.0121082	0.0016115
0.200602	0.0154383	0.00159182
0.201108	0.0100038	0.00161356
0.201614	0.016271	0.00158878
0.20212	0.0154228	0.00159876
0.202626	0.0136249	0.00159805
0.203133	0.0123785	0.00159148
0.203639	0.0103416	0.00159079
0.204145	0.0138888	0.00158192
0.204651	0.0135494	0.00159831
0.205157	0.0129098	0.00158466
0.205663	0.015394	0.00157954
0.206169	0.0130638	0.00159046
0.206676	0.0106741	0.0015601
0.207182	0.01006	0.00158982
0.207688	0.0114369	0.00157731
0.208194	0.0136024	0.00157179
0.2087	0.0114042	0.00157994
0.209206	0.0142308	0.00156061
0.209712	0.00962431	0.0015751
0.210218	0.0114184	0.00154716
0.210724	0.00954892	0.00156552
0.21123	0.00937739	0.00155445
0.211737	0.0115663	0.00155107
0.212243	0.0104536	0.00156177
0.212749	0.0120153	0.00154607
0.213255	0.0112454	0.0015489
0.213761	0.011098	0.00155145
0.214267	0.0107028	0.0015422
0.214773	0.0103618	0.00156173
0.215279	0.0120158	0.00153526
0.215785	0.00917056	0.00154594
0.216291	0.0129365	0.00155073
0.216797	0.0107438	0.00154468
0.217303	0.0102844	0.00155285
0.217809	0.00917545	0.00154113
0.218315	0.0106439	0.00154617
0.218821	0.0093738	0.00153478
0.219327	0.0105873	0.00153759
0.219833	0.0116976	0.00153835
0.22034	0.0112749	0.00154127
0.220846	0.0101412	0.001542
0.221352	0.00795206	0.00152341
0.221858	0.012311	0.00153833
0.222364	0.0107065	0.001523
0.22287	0.00906834	0.00152919
0.223376	0.01096	0.00153463
0.223882	0.0107211	0.00151974
0.224388	0.00965795	0.00153173
0.224894	0.00815975	0.00151554
0.2254	0.00747991	0.00152329
0.225906	0.00857356	0.00152225
0.226412	0.00948295	0.00151724
0.226918	0.0120864	0.00152627
0.227424	0.0106031	0.00151002
0.22793	0.00833498	0.00151195
0.228436	0.00492202	0.00151095
0.228942	0.010552	0.00151285
0.229447	0.00905367	0.00151671
0.229953	0.00680574	0.0014979
0.230459	0.0062954	0.00151524
0.230965	0.00855655	0.0015046
0.231471	0.00776546	0.00149736
0.231977	0.0089414	0.00150452
0.232483	0.00962199	0.00149767
0.232989	0.0109106	0.00151409
0.233495	0.00438791	0.00149618
0.234001	0.00653372	0.00149841
0.234507	0.00595441	0.00149159
0.235013	0.00683984	0.00149348
0.235519	0.00981442	0.00150405
0.236025	0.00452219	0.00148692
0.236531	0.00691012	0.00149147
0.237037	0.00544308	0.00148486
0.237542	0.00687447	0.00148833
0.238048	0.00989245	0.00149136
0.238554	0.00901157	0.00148013
0.23906	0.00600284	0.00149027
0.239566	0.00725254	0.00147876
0.240072	0.00694105	0.00147895
0.240578	0.00786377	0.00147913
0.241084	0.00709332	0.0014814
0.24159	0.00602571	0.00149021
0.242095	0.0050935	0.00147199
0.242601	0.00598357	0.0014767
0.243107	0.00411564	0.00151942
0.243613	0.00924829	0.00154631
0.244119	0.00943498	0.00157416
0.244625	0.00688817	0.0015647
0.245131	0.00764703	0.00160258
0.245637	0.00418065	0.00159211
0.246142	0.002933	0.00161944
0.246648	0.00680774	0.0016153
0.247154	0.00718872	0.00162718
0.24766	0.00736885	0.00165187
0.248166	0.00833636	0.00164927
0.248672	0.00589752	0.00166087
0.249177	0.00754865	0.00166988
0.249683	0.00562065	0.00167716
0.250189	0.00410185	0.00169011
0.250695	0.00218587	0.00168651
0.251201	0.00402576	0.0017031
0.251706	0.00494747	0.00169872
0.252212	0.00372575	0.00172071
0.252718	0.00333427	0.00164882
0.253224	0.00354749	0.00162069
0.25373	0.00481343	0.00161812
0.254235	0.00362686	0.00159891
0.254741	0.0062204	0.001599
0.255247	0.00643511	0.00157726
0.255753	0.00472358	0.00156454
0.256258	0.00953308	0.00156593
0.256764	0.00331293	0.00154607
0.25727	0.00606842	0.00154969
0.257776	0.00812552	0.00153564
0.258281	0.00325142	0.0015168
0.258787	0.00720832	0.00153307
0.259293	0.00598914	0.0015095
0.259799	0.00664923	0.00151766
0.260304	0.00948284	0.00149797
0.26081	0.00428344	0.00150165
0.261316	0.00508228	0.00149532
0.261822	0.00631589	0.00147866
0.262327	0.00517744	0.0014853
0.262833	0.0038697	0.00147068
0.263339	0.00818156	0.00148014
0.263844	0.00759885	0.00146311
0.26435	0.00516712	0.00145582
0.264856	0.00432035	0.00146533
0.265362	0.00214225	0.00145265
0.265867	0.00495541	0.00145582
0.266373	0.00608074	0.00145247
0.266879	0.00400301	0.00145514
0.267384	0.000816984	0.00145084
0.26789	0.00584467	0.00144491
0.268396	0.00389183	0.00144525
0.268901	0.00331424	0.00143916
0.269407	0.00286807	0.00144727
0.269913	0.000746884	0.00144172
0.270418	0.0043651	0.00144417
0.270924	0.00816189	0.00144164
0.27143	0.00423143	0.00142745
0.271935	0.00382091	0.00143918
0.272441	0.00356351	0.00143409
0.272947	0.00579431	0.00143274
0.273452	0.00293741	0.00143123
0.273958	0.00454318	0.00142726
0.274463	0.00372155	0.00143439
0.274969	0.00279202	0.00142727
0.275475	0.00577482	0.00142714
0.27598	0.00437469	0.00142282
0.276486	0.00937032	0.0014272
0.276991	0.0034127	0.00142533
0.277497	0.00541152	0.00141482
0.278003	0.00462769	0.00141761
0.278508	0.00421171	0.0014184
0.279014	0.00541284	0.00142119
0.279519	0.00390336	0.00142037
0.280025	0.00235822	0.00140027
0.28053	0.0061043	0.00142286
0.281036	0.00429956	0.00140254
0.281542	0.0045252	0.0014148
0.282047	0.00272115	0.00140997
0.282553	0.00401889	0.0014037
0.283058	0.00571222	0.00141519
0.283564	0.00500194	0.00139418
0.284069	0.00373444	0.0014083
0.284575	0.003855	0.0014028
0.28508	0.00495799	0.00139922
0.285586	0.0062203	0.00140804
0.286091	0.00629415	0.00139032
0.286597	0.00320592	0.00140318
0.287102	0.00503115	0.00139003
0.287608	0.00265585	0.0013949
0.288113	0.00480052	0.00139599
0.288619	0.00348368	0.0013874
0.289124	0.00124695	0.00139479
0.28963	0.00111565	0.00138155
0.290135	0.00368189	0.00139013
0.290641	0.00540256	0.00139261
0.291146	0.00198649	0.00138852
0.291652	0.00557082	0.00139214
0.292157	0.00546903	0.00137549
0.292663	0.00453746	0.00138415
0.293168	0.00563698	0.00138194
0.293674	0.00481911	0.00138132
0.294179	0.00362514	0.00138922
0.294685	0.00359877	0.00136734
0.29519	0.00539435	0.00138637
0.295695	0.00434207	0.00137079
0.296201	0.00353751	0.00137596
0.296706	0.00459053	0.00137523
0.297212	0.00427393	0.00137178
0.297717	0.00309731	0.00137861
0.298222	0.004334	0.0013677
0.298728	0.0036133	0.0013704
0.299233	0.00524052	0.00136946
0.299739	0.00470934	0.00136991
0.300244	0.00661207	0.00137437
0.300749	0.00393786	0.00135912
0.301255	0.00624539	0.00136944
0.30176	0.00275418	0.00136136
0.302266	0.00298974	0.00136012
0.302771	0.00487565	0.00136749
0.303276	0.00253121	0.00135369
0.303782	0.00390672	0.00136568
0.304287	0.00185789	0.00135054
0.304792	0.00613724	0.00135777
0.305298	0.00408751	0.00135039
0.305803	0.00295967	0.00134786
0.306308	0.00531071	0.0013611
0.306814	0.00336496	0.00134204
0.307319	0.00548591	0.00135254
0.307824	0.00474085	0.00134428
0.30833	0.00335801	0.00135407
0.308835	0.00441108	0.00134407
0.30934	0.00330291	0.00133501
0.309846	0.00430975	0.00135172
0.310351	0.0029613	0.00134201
0.310856	0.00507808	0.00134395
0.311361	0.00377858	0.00134533
0.311867	0.00692538	0.00134183
0.312372	0.00187908	0.00134499
0.312877	0.00506195	0.00133252
0.313383	-0.000434263	0.00134401
0.313888	0.00346858	0.00133417
0.314393	0.00367695	0.00134016
0.314898	0.00323269	0.00134209
0.315404	0.00298917	0.00132913
0.315909	0.00577248	0.00134342
0.316414	0.00210362	0.00133482
0.316919	0.00269367	0.00133245
0.317425	0.00688859	0.00133709
0.31793	0.00376991	0.0013269
0.318435	0.00528202	0.00133325
0.31894	0.0051161	0.00133322
0.319445	0.00374058	0.00132891
0.319951	0.00236334	0.00132422
0.320456	0.00215329	0.00132941
0.320961	0.0052872	0.00133156
0.321466	0.00201166	0.00131881
0.321971	0.00291729	0.00132357
0.322477	0.00595041	0.00132287
0.322982	0.00569878	0.00132792
0.323487	0.0045259	0.0013251
0.323992	0.00571272	0.00131761
0.324497	0.0035964	0.00131747
0.325002	0.003723	0.00131548
0.325508	0.00417747	0.00132211
0.326013	0.00370661	0.00131508
0.326518	0.00436982	0.00131633
0.327023	0.0035596	0.00131586
0.327528	0.00286973	0.00131285
0.328033	0.00331936	0.00131569
0.328538	0.00156125	0.00130693
0.329043	0.00488589	0.00130891
0.329549	0.00485793	0.00131684
0.330054	0.00287176	0.00129995
0.330559	0.00443722	0.00131246
0.331064	0.00480158	0.00129978
0.331569	0.00385967	0.00131375
0.332074	0.00813039	0.00131125
0.332579	0.00315143	0.00130404
0.333084	0.0031756	0.00130579
0.333589	0.00368234	0.00129625
0.334094	0.00509985	0.00130662
0.334599	0.00353879	0.00130077
0.335104	0.00340767	0.00129847
0.335609	0.00250214	0.00130572
0.336114	0.00230649	0.00129077
0.336619	0.00300723	0.00130077
0.337125	0.00532879	0.00128958
0.33763	0.00395752	0.00129344
0.338135	0.00218227	0.00130165
0.33864	0.0041284	0.00128981
0.339145	0.00637618	0.00129891
0.33965	0.00292614	0.00128898
0.340155	0.00296056	0.00129359
0.34066	0.0032412	0.00129328
0.341165	0.00404107	0.00129075
0.34167	0.00373351	0.0012891
0.342175	0.00556491	0.00128827
0.342679	0.00449318	0.00128985
0.343184	0.0059841	0.00128587
0.343689	0.00375523	0.00128293
0.344194	0.00427763	0.00128715
0.344699	0.00520705	0.00128736
0.345204	0.00386222	0.00128342
0.345709	0.0034156	0.00127986
0.346214	0.0053424	0.00128222
0.346719	0.00696514	0.00128417
0.347224	0.00472726	0.00128203
0.347729	0.00259697	0.00127827
0.348234	0.0055507	0.00128282
0.348739	0.00233486	0.00127415
0.349244	0.00333138	0.00127821
0.349749	0.0035253	0.001272
0.350253	0.00202115	0.00127225
0.350758	0.00482844	0.00127684
0.351263	0.00299654	0.00127331
0.351768	0.00277745	0.00127644
0.352273	0.00391426	0.00126553
0.352778	0.00381898	0.00127518
0.353283	0.00854946	0.0012767
0.353787	0.00597744	0.00126552
0.354292	0.00313648	0.00126711
0.354797	0.0042233	0.00127031
0.355302	0.00387066	0.00126738
0.355807	0.00486431	0.00126568
0.356312	0.00579153	0.00126712
0.356816	0.00385023	0.0012636
0.357321	0.00127477	0.00126843
0.357826	0.00198045	0.0012572
0.358331	0.00492449	0.00126538
0.358836	0.00241581	0.00126111
0.359341	0.00379348	0.00125778
0.359845	0.00280218	0.00126356
0.36035	0.00235119	0.00125561
0.360855	0.00552219	0.00126018
0.36136	0.00538229	0.00125832
0.361864	0.00306236	0.00125754
0.362369	0.0036698	0.00126248
0.362874	0.00362436	0.00124733
0.363379	0.00445003	0.00126177
0.363883	0.00537206	0.00125325
0.364388	0.00514966	0.00125644
0.364893	0.00453758	0.00125692
0.365398	0.0028784	0.00124404
0.365902	0.00450129	0.00126004
0.366407	0.00458759	0.00124435
0.366912	0.00563196	0.00125117
0.367416	0.00284775	0.00124969
0.367921	0.00442271	0.00124435
0.368426	0.00206398	0.00125285
0.36893	0.00565994	0.00124379
0.369435	0.0031511	0.00124836
0.36994	0.00594695	0.00124524
0.370444	0.00304091	0.0012437
0.370949	0.00671578	0.00125212
0.371454	0.00380634	0.00123756
0.371958	0.00315089	0.00124543
0.372463	0.00740332	0.00124734
0.372968	0.00545247	0.00124159
0.373472	0.00397852	0.00124539
0.373977	0.00440721	0.00123367
0.374482	0.004211	0.00124049
0.374986	0.00341381	0.00123938
0.375491	0.00502242	0.00123757
0.375995	0.00664859	0.00123719
0.3765	0.00309209	0.00124017
0.377005	0.00321522	0.00123769
0.377509	0.00259028	0.00123357
0.378014	0.00408822	0.00123547
0.378518	0.00552015	0.00123085
0.379023	0.00357936	0.00123429
0.379528	0.00356705	0.00123447
0.380032	0.00533879	0.00122931
0.380537	0.00433721	0.00123666
0.381041	0.00353971	0.00123285
0.381546	0.00590169	0.00123544
0.38205	0.00381235	0.00126789
0.382555	0.00384368	0.00128217
0.383059	0.0042167	0.00130222
0.383564	0.00643525	0.00129844
0.384068	0.00368857	0.00132031
0.384573	0.00727122	0.00132329
0.385077	0.00386831	0.00133319
0.385582	0.00426102	0.00134516
0.386086	0.00565384	0.00134
0.386591	0.00620821	0.00135166
0.387095	0.00349236	0.00135538
0.3876	0.00651081	0.00137433
0.388104	0.00520921	0.00138079
0.388609	0.000784442	0.00136457
0.389113	0.00451025	0.0013971
0.389618	0.00440263	0.00138567
0.390122	0.00469798	0.00139311
0.390626	0.00464955	0.00138916
0.391131	0.0023175	0.00139894
0.391635	0.00675392	0.00135308
0.39214	0.00543163	0.00132786
0.392644	0.00457823	0.00132588
0.393148	0.00493856	0.00130418
0.393653	0.00240999	0.00130455
0.394157	0.00344447	0.00129745
0.394662	0.00354798	0.00128531
0.395166	0.00644596	0.00128179
0.39567	0.00423644	0.001269
0.396175	0.00475805	0.00127141
0.396679	0.00475549	0.0012674
0.397183	0.00485533	0.00125781
0.397688	0.0059306	0.0012628
0.398192	0.00469378	0.00124804
0.398696	0.00328789	0.00124663
0.399201	0.00515088	0.00124027
0.399705	0.00337108	0.00124258
0.400209	0.00727401	0.00125113
0.400714	0.00191233	0.00123158
0.401218	0.00493372	0.00124249
0.401722	0.00529794	0.00123348
0.402227	0.00299048	0.00123616
0.402731	0.00417685	0.00123747
0.403235	0.00290138	0.00123059
0.403739	0.00538101	0.00123741
0.404244	0.00574413	0.00122778
0.404748	0.00487677	0.00123447
0.405252	0.00439223	0.00123178
0.405756	0.00315622	0.00122451
0.406261	0.00260072	0.00123508
0.406765	0.00642016	0.0012269
0.407269	0.00346464	0.00122403
0.407773	0.00522187	0.00122192
0.408278	0.00627977	0.00122409
0.408782	0.00310876	0.00123044
0.409286	0.00604887	0.00122083
0.40979	0.00470525	0.00122197
0.410294	0.00459904	0.0012166
0.410799	0.00586344	0.00122195
0.411303	0.00460431	0.00121772
0.411807	0.00385618	0.00121788
0.412311	0.00455908	0.00121944
0.412815	0.00329367	0.00121431
0.413319	0.00455513	0.00122032
0.413824	0.00669933	0.00121296
0.414328	0.00435027	0.00121017
0.414832	0.00255577	0.00121835
0.415336	0.00525164	0.00120469
0.41584	0.00407353	0.00121748
0.416344	0.00483243	0.0012079
0.416848	0.004378	0.0012086
0.417352	0.00406862	0.00121131
0.417856	0.00787964	0.0012087
0.418361	0.0021996	0.00121227
0.418865	0.00507622	0.00120434
0.419369	0.00406895	0.00120904
0.419873	0.00154785	0.0012017
0.420377	0.00486265	0.00120306
0.420881	0.00402062	0.00120581
0.421385	0.004679	0.0012016
0.421889	0.0052126	0.00120426
0.422393	0.00312501	0.00120262
0.422897	0.00524458	0.00119723
0.423401	0.00226246	0.00119876
0.423905	0.00332984	0.00119299
0.424409	0.00404757	0.0011998
0.424913	0.00230902	0.00119027
0.425417	0.00580134	0.0011973
0.425921	0.00654939	0.00119856
0.426425	0.00419573	0.00119437
0.426929	0.00257487	0.00119192
0.427433	0.00416887	0.00118778
0.427937	0.00530535	0.00119324
0.428441	0.00342329	0.00119068
0.428945	0.00526063	0.00119389
0.429449	0.00451974	0.00118778
0.429953	0.00390724	0.00118456
0.430457	0.00324079	0.00119479
0.430961	0.0060819	0.00118896
0.431464	0.00182289	0.0011838
0.431968	0.00421229	0.00118814
0.432472	0.00487008	0.0011881
0.432976	0.00373749	0.00119263
0.43348	0.0047244	0.00117877
0.433984	0.00521089	0.00119065
0.434488	0.00624199	0.00118653
0.434992	0.00596679	0.00118827
0.435496	0.00310542	0.0011869
0.435999	0.00171517	0.00117463
0.436503	0.00438743	0.00118869
0.437007	0.00294378	0.00117935
0.437511	0.00412264	0.00118378
0.438015	0.0049472	0.00118564
0.438519	0.00424699	0.00117743
0.439022	0.00335469	0.00118269
0.439526	0.00399502	0.00117677
0.44003	0.00341783	0.00117918
0.440534	0.00407306	0.00117907
0.441038	0.00491675	0.0011753
0.441541	0.00537917	0.00118154
0.442045	0.00416519	0.00117179
0.442549	0.0053193	0.00117736
0.443053	0.00507539	0.00117878
0.443556	0.00642216	0.00117741
0.44406	0.00555659	0.00117802
0.444564	0.00410181	0.00118609
0.445068	0.00473022	0.0012192
0.445571	0.00439131	0.00121445
0.446075	0.00614166	0.00122632
0.446579	0.00259219	0.00122384
0.447083	0.00516612	0.00123786
0.447586	0.00424412	0.0012376
0.44809	0.00467864	0.00123622
0.448594	0.0081394	0.00124302
0.449097	0.00404373	0.00124081
0.449601	0.00282458	0.00124749
0.450105	0.00533838	0.00125704
0.450608	0.00496034	0.0012439
0.451112	0.00472811	0.00126132
0.451616	0.0031683	0.00124837
0.452119	0.00499287	0.00126368
0.452623	0.00378145	0.00126243
0.453126	0.00351827	0.00126312
0.45363	0.00244289	0.00127076
0.454134	0.00339468	0.00125803
0.454637	0.00335376	0.00127049
0.455141	0.00319652	0.00126705
0.455644	0.00532366	0.00127562
0.456148	0.00321258	0.00127792
0.456652	0.0047542	0.00126976
0.457155	0.00333439	0.00127069
0.457659	0.000454119	0.00127149
0.458162	0.00406176	0.00126706
0.458666	0.00288932	0.00127596
0.459169	0.00515722	0.00126694
0.459673	0.00526881	0.00127858
0.460176	0.00362354	0.00126926
0.46068	0.00484348	0.00127903
0.461183	0.00529238	0.00127384
0.461687	0.00299122	0.00127821
0.46219	0.00200458	0.00128827
0.462694	0.00382658	0.00127381
0.463197	0.00464452	0.00128619
0.463701	0.00583509	0.00128212
0.464204	0.00602199	0.0012861
0.464708	0.00540451	0.00128511
0.465211	0.00326953	0.00128203
0.465715	0.00605563	0.00129409
0.466218	0.00668084	0.00128357
0.466722	0.00433439	0.00129693
0.467225	0.00291185	0.00128973
0.467728	0.00519843	0.00128777
0.468232	0.00303475	0.0012997
0.468735	0.00447649	0.0012909
0.469239	0.00473851	0.00129972
0.469742	0.00443465	0.00128945
0.470245	0.00459892	0.00129872
0.470749	0.00638198	0.00130755
0.471252	0.00436797	0.00128845
0.471755	0.00552684	0.00130525
0.472259	0.0058536	0.00129535
0.472762	0.00664126	0.00130782
0.473265	0.00294008	0.0013023
0.473769	0.00485788	0.00129971
0.474272	0.00179178	0.00130684
0.474775	0.00347951	0.00130463
0.475279	0.00503669	0.00130865
0.475782	0.00393992	0.00131153
0.476285	0.00556881	0.00130025
0.476789	0.00223256	0.00131161
0.477292	0.00582596	0.00130576
0.477795	0.00406336	0.00131511
0.478298	0.00292052	0.0013095
0.478802	0.0038004	0.00131396
0.479305	0.00132464	0.0013187
0.479808	0.006898	0.00130564
0.480311	0.00355797	0.00131286
0.480815	0.00359154	0.00131552
0.481318	0.00470996	0.00132244
0.481821	0.00515075	0.00131718
0.482324	0.00539662	0.00131429
0.482827	0.00466278	0.00132447
0.483331	0.0029656	0.00131267
0.483834	0.00560766	0.00132874
0.484337	0.00413364	0.00131679
0.48484	0.00491881	0.00132179
0.485343	0.00372702	0.00133405
0.485846	0.00517069	0.00130885
0.48635	0.00387599	0.00133435
0.486853	0.0041054	0.00131723
0.487356	0.00298101	0.00133166
0.487859	0.00826739	0.00133321
0.488362	0.00406226	0.00131634
0.488865	0.00338267	0.00133206
0.489368	0.00446174	0.00132133
0.489871	0.0023384	0.00133454
0.490374	0.00411809	0.0013306
0.490877	0.00539366	0.00132412
0.491381	0.00192002	0.00133981
0.491884	0.000762265	0.00132405
0.492387	0.00393905	0.00133566
0.49289	0.00427844	0.00133109
0.493393	0.0046645	0.00133021
0.493896	0.00639411	0.00134815
0.494399	0.00320164	0.00132507
0.494902	0.00356624	0.00134294
0.495405	0.00549009	0.00132921
0.495908	0.005807	0.00133975
0.496411	0.00427918	0.00134284
0.496914	0.00539172	0.00133416
0.497417	0.00391722	0.00134428
0.49792	0.00386005	0.00133744
0.498423	0.00137013	0.00134034
0.498926	0.00601262	0.00133871
0.499429	0.00308219	0.00134544
0.499932	0.00267235	0.00134652
0.500434	0.00541744	0.00134049

## Sheet: RRM1-2 + (GU)3
SAXS HPLC data: RRM1-2 + (GU)3
#q	I(q)	sd		Figure 5-figure supplement 8a
0.00866587	1.025777e-02	1.555033e-04
0.00912196	9.989424e-03	1.448865e-04
0.00957806	1.006622e-02	1.413257e-04
0.0100342	1.033184e-02	1.301046e-04
0.0104903	1.023537e-02	1.277765e-04
0.0109464	1.007962e-02	1.218226e-04
0.0114024	9.998122e-03	1.173480e-04
0.0118585	9.986552e-03	1.143131e-04
0.0123146	1.001356e-02	1.100822e-04
0.0127707	1.002721e-02	1.073346e-04
0.0132268	1.011389e-02	1.048098e-04
0.0136829	9.994888e-03	1.015483e-04
0.014139	9.918121e-03	1.006335e-04
0.0145951	9.981038e-03	9.675028e-05
0.0150512	9.935466e-03	9.558805e-05
0.0155073	9.802963e-03	9.277168e-05
0.0159634	9.737675e-03	9.208629e-05
0.0164195	9.868378e-03	8.920543e-05
0.0168756	9.710034e-03	8.818640e-05
0.0173317	9.658006e-03	8.771804e-05
0.0177878	9.720934e-03	8.396658e-05
0.0182439	9.855160e-03	8.475649e-05
0.0187	9.636850e-03	8.217122e-05
0.0191561	9.661043e-03	8.105265e-05
0.0196122	9.647228e-03	8.023380e-05
0.0200683	9.542938e-03	7.907139e-05
0.0205243	9.651219e-03	7.855541e-05
0.0209804	9.603355e-03	7.627022e-05
0.0214365	9.468562e-03	7.600596e-05
0.0218926	9.471663e-03	7.434824e-05
0.0223487	9.594263e-03	7.370634e-05
0.0228048	9.374192e-03	7.369539e-05
0.0232609	9.425480e-03	7.213017e-05
0.023717	9.396728e-03	7.198830e-05
0.0241731	9.258018e-03	6.917440e-05
0.0246292	9.454995e-03	7.001964e-05
0.0250853	9.159381e-03	6.957841e-05
0.0255414	9.074233e-03	6.756497e-05
0.0259974	9.110922e-03	6.754307e-05
0.0264535	9.241962e-03	6.627813e-05
0.0269096	9.147880e-03	6.744563e-05
0.0273657	9.073915e-03	6.810284e-05
0.0278218	8.993253e-03	6.758955e-05
0.0282779	8.989259e-03	6.842459e-05
0.028734	8.969221e-03	6.732765e-05
0.0291901	8.909773e-03	6.786941e-05
0.0296461	8.895149e-03	6.728120e-05
0.0301022	8.713943e-03	6.639282e-05
0.0305583	8.647768e-03	6.726529e-05
0.0310144	8.831594e-03	6.651023e-05
0.0314705	8.731415e-03	6.684579e-05
0.0319266	8.630617e-03	6.522155e-05
0.0323827	8.666670e-03	6.582042e-05
0.0328387	8.599898e-03	6.514536e-05
0.0332948	8.647028e-03	6.482140e-05
0.0337509	8.516441e-03	6.549377e-05
0.034207	8.508380e-03	6.357046e-05
0.0346631	8.293412e-03	6.426498e-05
0.0351191	8.398581e-03	6.340437e-05
0.0355752	8.338304e-03	6.338873e-05
0.0360313	8.323220e-03	6.341570e-05
0.0364874	8.340692e-03	6.177453e-05
0.0369435	8.305685e-03	6.303669e-05
0.0373996	8.141679e-03	6.214599e-05
0.0378556	8.012443e-03	6.158098e-05
0.0383117	8.099604e-03	6.125775e-05
0.0387678	7.982568e-03	6.080747e-05
0.0392239	7.998746e-03	6.115904e-05
0.0396799	7.825723e-03	5.999940e-05
0.040136	8.060207e-03	5.986270e-05
0.0405921	7.701978e-03	6.017822e-05
0.0410482	7.817941e-03	5.901577e-05
0.0415042	7.704092e-03	5.943835e-05
0.0419603	7.762127e-03	5.879049e-05
0.0424164	7.680859e-03	5.877759e-05
0.0428725	7.630223e-03	5.878127e-05
0.0433285	7.529643e-03	5.753248e-05
0.0437846	7.498339e-03	5.815981e-05
0.0442407	7.416882e-03	5.635189e-05
0.0446968	7.335582e-03	5.750498e-05
0.0451528	7.447937e-03	5.724518e-05
0.0456089	7.350895e-03	5.599976e-05
0.046065	7.253080e-03	5.645685e-05
0.046521	7.244546e-03	5.586721e-05
0.0469771	7.171397e-03	5.600037e-05
0.0474332	7.193278e-03	5.532696e-05
0.0478892	7.129506e-03	5.503196e-05
0.0483453	7.005304e-03	5.527997e-05
0.0488014	7.021202e-03	5.471034e-05
0.0492574	6.816040e-03	5.471340e-05
0.0497135	6.902445e-03	5.360436e-05
0.0501696	6.908476e-03	5.378798e-05
0.0506256	6.764876e-03	5.407020e-05
0.0510817	6.705128e-03	5.330843e-05
0.0515377	6.667173e-03	5.317112e-05
0.0519938	6.655830e-03	5.235812e-05
0.0524499	6.571922e-03	5.302454e-05
0.0529059	6.524388e-03	5.257728e-05
0.053362	6.538650e-03	5.207435e-05
0.053818	6.551564e-03	5.187662e-05
0.0542741	6.303694e-03	5.171498e-05
0.0547302	6.275543e-03	5.199716e-05
0.0551862	6.315977e-03	5.071217e-05
0.0556423	6.298852e-03	5.098429e-05
0.0560983	6.238388e-03	5.118132e-05
0.0565544	6.126614e-03	5.089711e-05
0.0570104	6.093924e-03	5.043947e-05
0.0574665	6.018553e-03	4.996023e-05
0.0579225	5.989400e-03	4.997904e-05
0.0583786	5.950156e-03	4.977181e-05
0.0588346	5.866244e-03	4.962843e-05
0.0592907	5.932151e-03	4.954132e-05
0.0597467	5.847358e-03	4.887315e-05
0.0602028	5.872419e-03	4.935529e-05
0.0606588	5.757680e-03	4.882261e-05
0.0611149	5.605837e-03	4.836149e-05
0.0615709	5.654353e-03	4.826692e-05
0.062027	5.658626e-03	4.814500e-05
0.062483	5.628284e-03	4.851693e-05
0.0629391	5.467237e-03	4.756411e-05
0.0633951	5.409825e-03	4.745875e-05
0.0638512	5.572127e-03	4.734777e-05
0.0643072	5.400383e-03	4.753075e-05
0.0647632	5.291685e-03	4.708032e-05
0.0652193	5.284266e-03	4.682240e-05
0.0656753	5.232391e-03	4.681767e-05
0.0661314	5.169586e-03	4.641941e-05
0.0665874	5.106892e-03	4.630707e-05
0.0670434	5.108830e-03	4.599291e-05
0.0674995	5.179377e-03	4.589021e-05
0.0679555	5.027867e-03	4.644664e-05
0.0684115	5.038577e-03	4.556270e-05
0.0688676	4.932823e-03	4.550782e-05
0.0693236	4.816532e-03	4.486450e-05
0.0697796	4.804033e-03	4.506931e-05
0.0702357	4.805152e-03	4.572876e-05
0.0706917	4.729650e-03	4.439623e-05
0.0711477	4.746439e-03	4.498386e-05
0.0716038	4.670008e-03	4.447206e-05
0.0720598	4.615483e-03	4.424874e-05
0.0725158	4.560041e-03	4.422738e-05
0.0729718	4.595895e-03	4.383400e-05
0.0734279	4.515192e-03	4.413079e-05
0.0738839	4.435589e-03	4.371982e-05
0.0743399	4.468167e-03	4.376952e-05
0.0747959	4.389101e-03	4.346376e-05
0.0752519	4.412652e-03	4.301165e-05
0.075708	4.312168e-03	4.353437e-05
0.076164	4.295115e-03	4.312561e-05
0.07662	4.212414e-03	4.294555e-05
0.077076	4.170570e-03	4.246715e-05
0.077532	4.172074e-03	4.242577e-05
0.077988	4.142863e-03	4.251310e-05
0.0784441	4.039161e-03	4.220269e-05
0.0789001	4.043555e-03	4.234636e-05
0.0793561	4.033145e-03	4.222000e-05
0.0798121	3.970470e-03	4.187057e-05
0.0802681	3.907910e-03	4.174966e-05
0.0807241	3.827145e-03	4.138516e-05
0.0811801	3.815456e-03	4.173605e-05
0.0816361	3.803211e-03	4.129686e-05
0.0820921	3.793221e-03	4.144331e-05
0.0825481	3.710963e-03	4.100245e-05
0.0830041	3.613004e-03	4.071291e-05
0.0834601	3.666445e-03	4.096759e-05
0.0839161	3.609786e-03	4.055342e-05
0.0843721	3.530944e-03	4.067649e-05
0.0848281	3.505586e-03	4.015072e-05
0.0852841	3.571489e-03	4.044973e-05
0.0857401	3.435263e-03	4.031187e-05
0.0861961	3.394315e-03	3.970177e-05
0.0866521	3.395398e-03	4.009776e-05
0.0871081	3.352092e-03	3.959821e-05
0.0875641	3.329141e-03	3.988231e-05
0.0880201	3.198313e-03	3.955108e-05
0.0884761	3.307879e-03	3.907338e-05
0.0889321	3.246524e-03	3.946545e-05
0.0893881	3.190279e-03	3.903218e-05
0.0898441	3.159114e-03	3.920242e-05
0.0903	3.129188e-03	3.964348e-05
0.090756	3.092254e-03	3.980010e-05
0.091212	3.103726e-03	4.070421e-05
0.091668	3.068066e-03	4.067197e-05
0.092124	2.952715e-03	4.094159e-05
0.09258	2.917509e-03	4.078120e-05
0.0930359	2.947096e-03	4.125802e-05
0.0934919	2.882968e-03	4.147740e-05
0.0939479	2.871207e-03	4.111643e-05
0.0944039	2.831255e-03	4.172925e-05
0.0948598	2.819900e-03	4.125878e-05
0.0953158	2.771405e-03	4.167084e-05
0.0957718	2.775656e-03	4.170645e-05
0.0962278	2.833501e-03	4.148888e-05
0.0966837	2.718670e-03	4.188016e-05
0.0971397	2.697468e-03	4.167299e-05
0.0975957	2.643420e-03	4.196177e-05
0.0980516	2.662191e-03	4.198848e-05
0.0985076	2.637265e-03	4.154532e-05
0.0989636	2.644226e-03	4.135935e-05
0.0994195	2.544392e-03	4.015003e-05
0.0998755	2.514525e-03	4.016289e-05
0.100331	2.447876e-03	3.923456e-05
0.100787	2.413840e-03	3.958627e-05
0.101243	2.435677e-03	3.899561e-05
0.101699	2.422193e-03	3.869547e-05
0.102155	2.431534e-03	3.871259e-05
0.102611	2.412640e-03	3.842738e-05
0.103067	2.385473e-03	3.807206e-05
0.103523	2.229421e-03	3.805117e-05
0.103979	2.294428e-03	3.773732e-05
0.104435	2.231170e-03	3.765452e-05
0.104891	2.256799e-03	3.754461e-05
0.105347	2.243908e-03	3.742206e-05
0.105803	2.167679e-03	3.690750e-05
0.106259	2.267885e-03	3.721602e-05
0.106715	2.061728e-03	3.692041e-05
0.107171	2.126715e-03	3.683813e-05
0.107627	2.113168e-03	3.675562e-05
0.108083	1.978205e-03	3.725539e-05
0.108538	2.105422e-03	3.803501e-05
0.108994	2.020011e-03	3.794134e-05
0.10945	2.084139e-03	3.845676e-05
0.109906	2.039863e-03	3.824224e-05
0.110362	1.974017e-03	3.763071e-05
0.110818	1.919029e-03	3.728885e-05
0.111274	1.918981e-03	3.651207e-05
0.11173	1.872102e-03	3.651539e-05
0.112186	1.940852e-03	3.622039e-05
0.112642	1.867496e-03	3.604027e-05
0.113098	1.806727e-03	3.584613e-05
0.113554	1.867656e-03	3.538800e-05
0.11401	1.901281e-03	3.558039e-05
0.114466	1.757161e-03	3.535433e-05
0.114921	1.752932e-03	3.507684e-05
0.115377	1.789948e-03	3.530279e-05
0.115833	1.781352e-03	3.466426e-05
0.116289	1.697419e-03	3.531617e-05
0.116745	1.735881e-03	3.465590e-05
0.117201	1.640971e-03	3.449325e-05
0.117657	1.649347e-03	3.455556e-05
0.118113	1.694547e-03	3.430717e-05
0.118569	1.666344e-03	3.470613e-05
0.119025	1.595892e-03	3.415465e-05
0.119481	1.622920e-03	3.413270e-05
0.119936	1.604604e-03	3.417891e-05
0.120392	1.626142e-03	3.394874e-05
0.120848	1.530052e-03	3.408803e-05
0.121304	1.529651e-03	3.361935e-05
0.12176	1.551218e-03	3.374669e-05
0.122216	1.489320e-03	3.379648e-05
0.122672	1.492056e-03	3.330480e-05
0.123128	1.465747e-03	3.349737e-05
0.123584	1.485920e-03	3.334484e-05
0.124039	1.390921e-03	3.339813e-05
0.124495	1.414600e-03	3.323290e-05
0.124951	1.465770e-03	3.317250e-05
0.125407	1.385470e-03	3.292585e-05
0.125863	1.388206e-03	3.299446e-05
0.126319	1.402807e-03	3.304800e-05
0.126775	1.390539e-03	3.280978e-05
0.127231	1.301608e-03	3.298111e-05
0.127686	1.301859e-03	3.369506e-05
0.128142	1.315615e-03	3.396525e-05
0.128598	1.370693e-03	3.409839e-05
0.129054	1.298848e-03	3.417485e-05
0.12951	1.259256e-03	3.434831e-05
0.129966	1.319930e-03	3.475901e-05
0.130422	1.233762e-03	3.469717e-05
0.130878	1.243434e-03	3.452491e-05
0.131333	1.193875e-03	3.443410e-05
0.131789	1.240958e-03	3.472501e-05
0.132245	1.291564e-03	3.478122e-05
0.132701	1.210869e-03	3.445534e-05
0.133157	1.110998e-03	3.460397e-05
0.133613	1.104048e-03	3.444820e-05
0.134069	1.175034e-03	3.458900e-05
0.134524	1.144940e-03	3.453178e-05
0.13498	1.114475e-03	3.445210e-05
0.135436	1.149082e-03	3.459986e-05
0.135892	1.096847e-03	3.456235e-05
0.136348	1.069776e-03	3.432062e-05
0.136804	1.143958e-03	3.443396e-05
0.137259	1.127079e-03	3.449058e-05
0.137715	1.059913e-03	3.458832e-05
0.138171	1.054172e-03	3.425958e-05
0.138627	1.124635e-03	3.442249e-05
0.139083	1.033944e-03	3.440387e-05
0.139539	1.043976e-03	3.446880e-05
0.139994	1.012428e-03	3.419524e-05
0.14045	1.009063e-03	3.433639e-05
0.140906	9.980374e-04	3.411157e-05
0.141362	9.687042e-04	3.426391e-05
0.141818	1.028330e-03	3.418260e-05
0.142274	9.831071e-04	3.375674e-05
0.142729	9.627896e-04	3.413040e-05
0.143185	9.831033e-04	3.395951e-05
0.143641	9.430357e-04	3.407405e-05
0.144097	9.018215e-04	3.389713e-05
0.144553	9.361052e-04	3.371188e-05
0.145008	9.420858e-04	3.405986e-05
0.145464	9.057776e-04	3.373771e-05
0.14592	9.488093e-04	3.397163e-05
0.146376	9.344514e-04	3.389534e-05
0.146832	8.692139e-04	3.366262e-05
0.147287	8.537827e-04	3.396598e-05
0.147743	8.767393e-04	3.359979e-05
0.148199	8.652088e-04	3.392988e-05
0.148655	8.445040e-04	3.381894e-05
0.149111	8.499398e-04	3.377909e-05
0.149566	8.582743e-04	3.381728e-05
0.150022	8.626326e-04	3.372498e-05
0.150478	8.387615e-04	3.367036e-05
0.150934	7.800528e-04	3.358727e-05
0.15139	8.016245e-04	3.356967e-05
0.151845	8.928365e-04	3.366664e-05
0.152301	7.524542e-04	3.345454e-05
0.152757	8.918467e-04	3.377930e-05
0.153213	7.962306e-04	3.346273e-05
0.153668	7.501741e-04	3.347069e-05
0.154124	7.784013e-04	3.343112e-05
0.15458	7.878581e-04	3.343766e-05
0.155036	6.839929e-04	3.339361e-05
0.155491	6.211747e-04	3.311925e-05
0.155947	6.978634e-04	3.341845e-05
0.156403	7.801036e-04	3.298667e-05
0.156859	6.735113e-04	3.332516e-05
0.157315	6.734556e-04	3.315028e-05
0.15777	6.869007e-04	3.304025e-05
0.158226	6.872175e-04	3.310290e-05
0.158682	6.812846e-04	3.271466e-05
0.159138	7.394202e-04	3.298784e-05
0.159593	6.945317e-04	3.276612e-05
0.160049	6.636644e-04	3.250509e-05
0.160505	6.074560e-04	3.276703e-05
0.16096	6.501989e-04	3.249263e-05
0.161416	6.546644e-04	3.267206e-05
0.161872	6.618146e-04	3.242622e-05
0.162328	6.268847e-04	3.235261e-05
0.162783	6.190092e-04	3.270753e-05
0.163239	5.691725e-04	3.223152e-05
0.163695	6.071097e-04	3.252784e-05
0.164151	6.312596e-04	3.229508e-05
0.164606	6.245024e-04	3.245698e-05
0.165062	5.817641e-04	3.233571e-05
0.165518	6.130360e-04	3.230515e-05
0.165973	5.896299e-04	3.222545e-05
0.166429	6.294021e-04	3.219441e-05
0.166885	5.656214e-04	3.235873e-05
0.167341	5.791848e-04	3.214958e-05
0.167796	5.116990e-04	3.191824e-05
0.168252	6.182231e-04	3.230656e-05
0.168708	5.447913e-04	3.217864e-05
0.169163	5.516235e-04	3.210700e-05
0.169619	5.514817e-04	3.192778e-05
0.170075	5.591409e-04	3.197230e-05
0.170531	5.291794e-04	3.212194e-05
0.170986	5.849777e-04	3.184233e-05
0.171442	5.437698e-04	3.223109e-05
0.171898	4.291154e-04	3.156595e-05
0.172353	4.453326e-04	3.207471e-05
0.172809	5.077001e-04	3.179314e-05
0.173265	5.224714e-04	3.181099e-05
0.17372	4.810429e-04	3.178330e-05
0.174176	5.106048e-04	3.167232e-05
0.174632	4.307888e-04	3.194975e-05
0.175087	4.320535e-04	3.161077e-05
0.175543	4.889243e-04	3.167903e-05
0.175999	5.022127e-04	3.171900e-05
0.176454	4.670912e-04	3.159262e-05
0.17691	4.768828e-04	3.174556e-05
0.177366	4.153016e-04	3.137043e-05
0.177821	4.876828e-04	3.166599e-05
0.178277	4.277626e-04	3.156907e-05
0.178733	4.565787e-04	3.132196e-05
0.179188	4.262195e-04	3.166409e-05
0.179644	4.325718e-04	3.135898e-05
0.1801	4.304391e-04	3.159984e-05
0.180555	4.688129e-04	3.150710e-05
0.181011	3.988740e-04	3.113984e-05
0.181467	4.491272e-04	3.149190e-05
0.181922	4.501809e-04	3.118581e-05
0.182378	4.214766e-04	3.142361e-05
0.182834	3.871709e-04	3.134594e-05
0.183289	3.887870e-04	3.099652e-05
0.183745	3.911790e-04	3.150789e-05
0.1842	4.130552e-04	3.095210e-05
0.184656	4.148135e-04	3.125373e-05
0.185112	3.806588e-04	3.111200e-05
0.185567	4.329341e-04	3.112126e-05
0.186023	3.830653e-04	3.131656e-05
0.186479	3.821471e-04	3.094087e-05
0.186934	3.684672e-04	3.104850e-05
0.18739	3.372655e-04	3.096076e-05
0.187845	2.715635e-04	3.096885e-05
0.188301	3.609345e-04	3.104524e-05
0.188757	3.854925e-04	3.084657e-05
0.189212	3.582126e-04	3.092107e-05
0.189668	3.399764e-04	3.076941e-05
0.190123	3.641758e-04	3.097436e-05
0.190579	3.247119e-04	3.082598e-05
0.191035	3.182190e-04	3.087014e-05
0.19149	2.692013e-04	3.091658e-05
0.191946	2.307977e-04	3.056023e-05
0.192401	3.238515e-04	3.075210e-05
0.192857	3.389299e-04	3.062116e-05
0.193313	3.188066e-04	3.070900e-05
0.193768	3.233537e-04	3.081705e-05
0.194224	3.061672e-04	3.038624e-05
0.194679	3.588381e-04	3.075239e-05
0.195135	2.875777e-04	3.065282e-05
0.19559	2.959674e-04	3.051435e-05
0.196046	2.946150e-04	3.047926e-05
0.196502	3.748002e-04	3.057896e-05
0.196957	2.673019e-04	3.055927e-05
0.197413	3.152038e-04	3.049323e-05
0.197868	2.862755e-04	3.046598e-05
0.198324	3.182441e-04	3.038689e-05
0.198779	2.853279e-04	3.023946e-05
0.199235	3.073355e-04	3.056515e-05
0.19969	2.935322e-04	3.038524e-05
0.200146	2.783502e-04	3.031614e-05
0.200601	2.485374e-04	3.019785e-05
0.201057	3.040681e-04	3.029234e-05
0.201513	2.785579e-04	3.034502e-05
0.201968	2.823980e-04	3.025345e-05
0.202424	2.697450e-04	3.023546e-05
0.202879	2.715022e-04	3.018529e-05
0.203335	2.264776e-04	3.027633e-05
0.20379	2.620334e-04	3.010249e-05
0.204246	2.192018e-04	3.011294e-05
0.204701	2.983793e-04	3.016179e-05
0.205157	2.459949e-04	2.999593e-05
0.205612	2.417633e-04	3.019960e-05
0.206068	2.484599e-04	2.991623e-05
0.206523	2.510333e-04	3.001815e-05
0.206979	2.080063e-04	3.004090e-05
0.207434	2.499240e-04	2.990590e-05
0.20789	1.878562e-04	3.003023e-05
0.208345	2.410449e-04	2.974131e-05
0.208801	1.708972e-04	3.003928e-05
0.209256	2.279867e-04	2.982125e-05
0.209712	2.586351e-04	2.978862e-05
0.210167	1.955015e-04	2.994399e-05
0.210623	1.813228e-04	2.960428e-05
0.211078	2.176016e-04	2.993383e-05
0.211534	2.062943e-04	2.978067e-05
0.211989	1.997450e-04	2.970675e-05
0.212445	1.885333e-04	2.978336e-05
0.2129	2.135542e-04	2.956792e-05
0.213356	1.498396e-04	2.985402e-05
0.213811	1.649393e-04	2.966100e-05
0.214267	1.779430e-04	2.961991e-05
0.214722	1.708414e-04	2.971184e-05
0.215177	2.063626e-04	2.948694e-05
0.215633	2.058828e-04	2.960876e-05
0.216088	1.739020e-04	2.998411e-05
0.216544	1.847574e-04	3.068819e-05
0.216999	2.272600e-04	3.100507e-05
0.217455	1.572844e-04	3.111242e-05
0.21791	1.910610e-04	3.130672e-05
0.218366	2.094434e-04	3.165832e-05
0.218821	1.826006e-04	3.193862e-05
0.219276	2.511360e-04	3.197223e-05
0.219732	1.878763e-04	3.214104e-05
0.220187	1.916948e-04	3.236774e-05
0.220643	1.781023e-04	3.243736e-05
0.221098	2.100667e-04	3.275387e-05
0.221554	1.304096e-04	3.257402e-05
0.222009	2.196031e-04	3.299150e-05
0.222464	2.212227e-04	3.306834e-05
0.22292	1.158672e-04	3.322010e-05
0.223375	1.524582e-04	3.340350e-05
0.223831	1.642921e-04	3.308731e-05
0.224286	1.635152e-04	3.375702e-05
0.224741	1.408694e-04	3.284038e-05
0.225197	1.155609e-04	3.232795e-05
0.225652	1.136705e-04	3.222702e-05
0.226108	1.382787e-04	3.158673e-05
0.226563	1.846398e-04	3.175024e-05
0.227018	1.045453e-04	3.137972e-05
0.227474	1.455825e-04	3.147820e-05
0.227929	1.477279e-04	3.135122e-05
0.228385	2.147989e-04	3.123343e-05
0.22884	9.755883e-05	3.104772e-05
0.229295	1.085508e-04	3.078341e-05
0.229751	1.484322e-04	3.089703e-05
0.230206	1.627628e-04	3.093522e-05
0.230661	1.142640e-04	3.067391e-05
0.231117	1.046992e-04	3.080231e-05
0.231572	1.477849e-04	3.044641e-05
0.232027	1.352156e-04	3.065217e-05
0.232483	9.736257e-05	3.042897e-05
0.232938	1.688442e-04	3.047315e-05
0.233393	1.639809e-04	3.034551e-05
0.233849	1.179695e-04	3.033273e-05
0.234304	1.183720e-04	3.040321e-05
0.234759	1.759253e-04	3.004238e-05
0.235215	1.434529e-04	3.027892e-05
0.23567	1.478195e-04	3.024058e-05
0.236125	2.060653e-04	3.015760e-05
0.236581	1.372179e-04	3.005192e-05
0.237036	1.744375e-04	2.986604e-05
0.237491	1.040416e-04	2.992114e-05
0.237947	1.535911e-04	2.993436e-05
0.238402	1.236489e-04	2.996842e-05
0.238857	1.548788e-04	2.994891e-05
0.239313	1.169598e-04	2.962065e-05
0.239768	1.611861e-04	2.998286e-05
0.240223	2.027000e-04	2.957381e-05
0.240679	7.074966e-05	2.972198e-05
0.241134	9.772563e-05	2.973122e-05
0.241589	9.047731e-05	2.954144e-05
0.242044	1.347199e-04	2.965080e-05
0.2425	6.091054e-05	2.933659e-05
0.242955	1.656235e-04	2.954619e-05
0.24341	6.963371e-05	2.926270e-05
0.243866	1.128165e-04	2.941591e-05
0.244321	1.031197e-04	2.937958e-05
0.244776	1.324166e-04	2.917671e-05
0.245231	5.933669e-05	2.938524e-05
0.245687	3.542309e-05	2.914136e-05
0.246142	8.458461e-05	2.912660e-05
0.246597	1.142639e-04	2.928728e-05
0.247052	1.396416e-04	2.927973e-05
0.247508	1.546714e-04	2.928811e-05
0.247963	9.692443e-05	2.895159e-05
0.248418	1.310032e-04	2.906307e-05
0.248873	9.927199e-05	2.895878e-05
0.249329	7.922857e-05	2.913036e-05
0.249784	1.114208e-04	2.913091e-05
0.250239	7.370173e-05	2.897028e-05
0.250694	1.136878e-04	2.900643e-05
0.25115	5.299986e-05	2.883974e-05
0.251605	6.259687e-05	2.894330e-05
0.25206	1.348223e-04	2.876361e-05
0.252515	1.140714e-04	2.870515e-05
0.25297	1.504984e-04	2.883765e-05
0.253426	7.606884e-05	2.867854e-05
0.253881	9.015603e-05	2.865421e-05
0.254336	1.318198e-04	2.853705e-05
0.254791	1.091301e-04	2.838132e-05
0.255246	7.052385e-05	2.855896e-05
0.255702	5.801750e-05	2.829183e-05
0.256157	1.274567e-04	2.843845e-05
0.256612	1.036555e-04	2.813450e-05
0.257067	5.798800e-05	2.827681e-05
0.257522	1.070407e-04	2.838608e-05
0.257978	7.470193e-05	2.793015e-05
0.258433	1.013535e-04	2.831507e-05
0.258888	9.694878e-05	2.795119e-05
0.259343	7.427356e-05	2.822197e-05
0.259798	9.113671e-05	2.799278e-05
0.260253	5.106950e-05	2.789783e-05
0.260709	8.701017e-05	2.813816e-05
0.261164	9.767840e-05	2.796305e-05
0.261619	1.476131e-04	2.802324e-05
0.262074	1.000065e-04	2.790501e-05
0.262529	5.831854e-05	2.793704e-05
0.262984	8.468404e-05	2.800563e-05
0.263439	1.463071e-04	2.777060e-05
0.263895	1.333859e-04	2.802683e-05
0.26435	6.630670e-05	2.776660e-05
0.264805	7.884940e-05	2.790222e-05
0.26526	4.983467e-05	2.793991e-05
0.265715	2.337093e-05	2.759110e-05
0.26617	4.161788e-05	2.772005e-05
0.266625	8.631712e-05	2.770570e-05
0.26708	1.160954e-04	2.792825e-05
0.267536	1.126703e-04	2.761881e-05
0.267991	6.412002e-05	2.770194e-05
0.268446	2.171553e-05	2.772315e-05
0.268901	9.503640e-05	2.765038e-05
0.269356	5.179778e-05	2.758559e-05
0.269811	1.063660e-04	2.767937e-05
0.270266	8.900737e-05	2.755848e-05
0.270721	1.089952e-04	2.777800e-05
0.271176	5.177489e-05	2.732901e-05
0.271631	1.113879e-04	2.764035e-05
0.272086	8.838417e-05	2.744343e-05
0.272541	5.969729e-05	2.759444e-05
0.272997	1.238174e-04	2.760843e-05
0.273452	4.970553e-05	2.734770e-05
0.273907	7.321945e-05	2.748516e-05
0.274362	8.059463e-05	2.737664e-05
0.274817	7.086149e-05	2.747329e-05
0.275272	3.027950e-05	2.739364e-05
0.275727	4.223295e-05	2.732689e-05
0.276182	8.379817e-05	2.755681e-05
0.276637	8.565945e-05	2.723177e-05
0.277092	6.501525e-05	2.719679e-05
0.277547	8.294063e-05	2.735906e-05
0.278002	1.106824e-04	2.720922e-05
0.278457	4.666267e-05	2.743509e-05
0.278912	9.078205e-05	2.721702e-05
0.279367	2.395219e-05	2.731929e-05
0.279822	8.470228e-05	2.708412e-05
0.280277	3.612035e-05	2.724650e-05
0.280732	9.631155e-05	2.711327e-05
0.281187	8.947973e-05	2.722439e-05
0.281642	5.717446e-05	2.720479e-05
0.282097	6.044441e-05	2.705417e-05
0.282552	4.374458e-05	2.715263e-05
0.283007	8.246221e-05	2.699474e-05
0.283462	7.002333e-05	2.719174e-05
0.283917	5.302824e-05	2.714741e-05
0.284372	3.095233e-05	2.694125e-05
0.284827	1.041337e-04	2.710608e-05
0.285282	7.708380e-05	2.688491e-05
0.285737	5.532554e-05	2.700829e-05
0.286192	1.662079e-05	2.699829e-05
0.286647	7.273829e-05	2.698596e-05
0.287102	3.220340e-05	2.707474e-05
0.287557	5.238084e-05	2.680488e-05
0.288012	7.044178e-05	2.689213e-05
0.288467	7.554983e-05	2.685658e-05
0.288922	9.467961e-05	2.690000e-05
0.289377	9.527403e-05	2.703266e-05
0.289832	7.110276e-05	2.670544e-05
0.290286	8.364867e-05	2.695101e-05
0.290741	7.916530e-05	2.673048e-05
0.291196	1.412961e-05	2.676887e-05
0.291651	6.303088e-05	2.685828e-05
0.292106	8.695208e-05	2.672536e-05
0.292561	1.236360e-04	2.683455e-05
0.293016	2.818214e-05	2.666767e-05
0.293471	6.964866e-05	2.671644e-05
0.293926	1.015249e-04	2.676256e-05
0.294381	7.176340e-05	2.662153e-05
0.294836	6.992879e-05	2.684260e-05
0.29529	6.470619e-05	2.646950e-05
0.295745	6.294100e-05	2.665396e-05
0.2962	7.161559e-05	2.650108e-05
0.296655	9.551470e-05	2.667789e-05
0.29711	2.158510e-05	2.659981e-05
0.297565	9.381875e-05	2.649188e-05
0.29802	7.209451e-05	2.663733e-05
0.298475	7.078258e-05	2.642309e-05
0.298929	1.142769e-04	2.659140e-05
0.299384	4.450261e-05	2.640352e-05
0.299839	1.990743e-05	2.651305e-05
0.300294	9.526555e-05	2.652625e-05
0.300749	3.722067e-05	2.638363e-05
0.301204	7.804480e-05	2.651835e-05
0.301659	4.348755e-05	2.638712e-05
0.302113	7.894093e-05	2.636901e-05
0.302568	5.143282e-05	2.649448e-05
0.303023	6.027998e-05	2.621601e-05
0.303478	4.680661e-05	2.644559e-05
0.303933	6.013124e-05	2.619508e-05
0.304388	5.577488e-05	2.634779e-05
0.304842	7.156057e-05	2.631190e-05
0.305297	9.839325e-05	2.636070e-05
0.305752	7.946738e-05	2.636743e-05
0.306207	6.376257e-05	2.626566e-05
0.306662	8.158937e-05	2.623082e-05
0.307116	8.677649e-05	2.627025e-05
0.307571	7.411166e-05	2.616595e-05
0.308026	3.138193e-05	2.624271e-05
0.308481	6.120711e-05	2.617649e-05
0.308935	4.268971e-05	2.616974e-05
0.30939	5.635613e-05	2.622414e-05
0.309845	1.152740e-04	2.612818e-05
0.3103	3.965731e-05	2.611359e-05
0.310755	6.431672e-05	2.604615e-05
0.311209	6.682338e-05	2.614815e-05
0.311664	2.657391e-05	2.607732e-05
0.312119	6.809862e-05	2.610190e-05
0.312574	5.494536e-05	2.604213e-05
0.313028	5.634662e-05	2.613691e-05
0.313483	8.811786e-05	2.601180e-05
0.313938	8.724815e-05	2.598259e-05
0.314392	4.674013e-05	2.603330e-05
0.314847	1.038393e-04	2.597038e-05
0.315302	9.634705e-05	2.598610e-05
0.315757	5.640559e-05	2.602274e-05
0.316211	2.880056e-05	2.584807e-05
0.316666	4.745509e-05	2.599911e-05
0.317121	1.139933e-04	2.591522e-05
0.317575	8.902795e-05	2.594334e-05
0.31803	1.384944e-04	2.589419e-05
0.318485	4.817078e-05	2.586682e-05
0.31894	5.347843e-05	2.587339e-05
0.319394	4.773343e-05	2.570729e-05
0.319849	1.036773e-04	2.593408e-05
0.320304	9.959763e-05	2.588613e-05
0.320758	7.295051e-05	2.575790e-05
0.321213	1.040968e-04	2.588960e-05
0.321668	6.569756e-05	2.567759e-05
0.322122	6.157904e-05	2.573916e-05
0.322577	7.078349e-05	2.574831e-05
0.323032	9.781624e-05	2.575615e-05
0.323486	8.039544e-05	2.577891e-05
0.323941	6.851275e-05	2.565295e-05
0.324396	9.047928e-05	2.581052e-05
0.32485	5.994311e-05	2.552446e-05
0.325305	1.262765e-05	2.569665e-05
0.325759	9.930911e-05	2.560740e-05
0.326214	7.791181e-06	2.559909e-05
0.326669	6.539999e-05	2.575928e-05
0.327123	8.861130e-05	2.551807e-05
0.327578	6.386935e-05	2.567812e-05
0.328033	4.904217e-05	2.548075e-05
0.328487	7.128357e-05	2.557322e-05
0.328942	7.926830e-05	2.563604e-05
0.329396	6.567259e-05	2.548196e-05
0.329851	3.401443e-05	2.556749e-05
0.330306	5.793118e-05	2.540116e-05
0.33076	7.229286e-05	2.550233e-05
0.331215	5.829149e-05	2.549082e-05
0.331669	6.129985e-05	2.549075e-05
0.332124	6.146686e-05	2.556420e-05
0.332578	6.109163e-05	2.534532e-05
0.333033	1.427413e-04	2.552868e-05
0.333488	7.310954e-05	2.531450e-05
0.333942	5.438836e-05	2.547363e-05
0.334397	7.985636e-05	2.551638e-05
0.334851	5.532413e-05	2.520524e-05
0.335306	6.709738e-05	2.553221e-05
0.33576	7.467199e-05	2.529629e-05
0.336215	9.801371e-05	2.533626e-05
0.336669	8.941736e-05	2.532283e-05
0.337124	8.310717e-05	2.538572e-05
0.337578	5.230844e-05	2.524563e-05
0.338033	6.324514e-05	2.529464e-05
0.338487	1.320130e-04	2.534129e-05
0.338942	3.253256e-05	2.521045e-05
0.339396	8.941124e-05	2.524530e-05
0.339851	4.063190e-05	2.525694e-05
0.340305	5.105657e-05	2.516950e-05
0.34076	8.471883e-05	2.535202e-05
0.341214	8.500309e-05	2.554685e-05
0.341669	5.541267e-05	2.597256e-05
0.342123	6.849640e-05	2.641834e-05
0.342578	5.677943e-05	2.640732e-05
0.343032	1.132880e-04	2.680713e-05
0.343487	1.605806e-04	2.672367e-05
0.343941	8.410178e-05	2.703608e-05
0.344396	3.360392e-05	2.746511e-05
0.34485	4.867827e-05	2.819342e-05
0.345305	4.571327e-05	2.892019e-05
0.345759	3.778073e-05	2.889095e-05
0.346213	3.791470e-05	2.950201e-05
0.346668	1.138568e-04	2.958903e-05
0.347122	1.112244e-04	2.965326e-05
0.347577	5.511768e-05	3.026261e-05
0.348031	4.186284e-05	3.006544e-05
0.348486	1.157482e-04	3.075881e-05
0.34894	7.989401e-05	3.056455e-05
0.349394	8.348457e-05	3.102504e-05
0.349849	1.317763e-04	3.057589e-05
0.350303	2.619033e-05	2.983897e-05
0.350758	5.277214e-05	2.999270e-05
0.351212	7.725486e-05	2.953748e-05
0.351666	3.919594e-05	2.969108e-05
0.352121	2.734667e-05	2.945719e-05
0.352575	8.658150e-05	2.946530e-05
0.35303	1.077041e-04	2.947545e-05
0.353484	9.267137e-05	2.922504e-05
0.353938	5.316460e-05	2.933935e-05
0.354393	5.953901e-05	2.923293e-05
0.354847	5.695999e-05	2.919700e-05
0.355301	3.572773e-05	2.922981e-05
0.355756	4.779115e-05	2.909331e-05
0.35621	7.327382e-05	2.924680e-05
0.356664	7.180574e-05	2.912446e-05
0.357119	1.133843e-04	2.910967e-05
0.357573	6.223450e-05	2.899739e-05
0.358027	3.133300e-05	2.872256e-05
0.358482	1.208731e-04	2.899435e-05
0.358936	4.359966e-05	2.861657e-05
0.35939	7.840670e-05	2.906585e-05
0.359845	1.283762e-04	2.871144e-05
0.360299	5.775271e-05	2.892726e-05
0.360753	7.563939e-05	2.886573e-05
0.361207	1.868290e-05	2.868746e-05
0.361662	7.286751e-05	2.895767e-05
0.362116	7.114610e-05	2.876033e-05
0.36257	5.810185e-05	2.881906e-05
0.363025	7.472932e-05	2.885563e-05
0.363479	9.684178e-05	2.880435e-05
0.363933	9.088650e-05	2.900093e-05
0.364387	1.042877e-04	2.871854e-05
0.364842	8.808962e-05	2.888515e-05
0.365296	6.570846e-05	2.870548e-05
0.36575	7.386502e-05	2.870551e-05
0.366204	8.449112e-05	2.891375e-05
0.366659	5.573057e-05	2.852657e-05
0.367113	1.064460e-04	2.886178e-05
0.367567	8.695121e-05	2.856894e-05
0.368021	3.640305e-05	2.874963e-05
0.368476	1.126730e-04	2.863861e-05
0.36893	4.003087e-05	2.851028e-05
0.369384	7.960437e-05	2.859089e-05
0.369838	8.018031e-05	2.845790e-05
0.370292	4.549148e-05	2.853458e-05
0.370747	4.452727e-05	2.839446e-05
0.371201	6.561355e-05	2.836962e-05
0.371655	3.286229e-05	2.855692e-05
0.372109	1.174742e-04	2.824671e-05
0.372563	1.023838e-04	2.861696e-05
0.373017	7.356426e-05	2.834112e-05
0.373472	9.609920e-05	2.849167e-05
0.373926	5.741835e-05	2.854821e-05
0.37438	1.040068e-04	2.841312e-05
0.374834	6.385155e-05	2.864438e-05
0.375288	9.255942e-05	2.827209e-05
0.375742	8.881376e-05	2.865467e-05
0.376197	3.435779e-05	2.850024e-05
0.376651	4.508217e-05	2.840772e-05
0.377105	9.272462e-05	2.865365e-05
0.377559	7.593618e-05	2.831016e-05
0.378013	9.551416e-05	2.868481e-05
0.378467	6.745115e-05	2.867540e-05
0.378921	1.112057e-04	2.856655e-05
0.379375	5.779850e-05	2.875280e-05
0.37983	4.627781e-05	2.831960e-05
0.380284	9.002489e-05	2.878560e-05
0.380738	6.615010e-05	2.852547e-05
0.381192	7.481348e-05	2.871015e-05
0.381646	7.739171e-05	2.865717e-05
0.3821	1.540156e-04	2.863898e-05
0.382554	1.289949e-04	2.885053e-05
0.383008	3.313093e-05	2.849494e-05
0.383462	4.805180e-05	2.877854e-05
0.383916	8.903987e-05	2.871817e-05
0.38437	5.088785e-05	2.866604e-05
0.384824	2.548816e-05	2.883742e-05
0.385278	5.029552e-05	2.851022e-05
0.385732	8.733627e-05	2.882387e-05
0.386186	2.157198e-05	2.870533e-05
0.38664	4.784635e-05	2.885497e-05
0.387094	4.589023e-05	2.885773e-05
0.387548	9.157142e-05	2.874184e-05
0.388003	4.408053e-05	2.880523e-05
0.388457	4.779059e-05	2.864619e-05
0.388911	1.175374e-04	2.891039e-05
0.389365	1.990725e-06	2.885513e-05
0.389819	1.125908e-04	2.884042e-05
0.390273	1.040579e-04	2.897914e-05
0.390726	5.557575e-05	2.861340e-05
0.39118	9.748727e-05	2.902566e-05
0.391634	1.099478e-04	2.879494e-05
0.392088	4.888121e-05	2.893009e-05
0.392542	1.408318e-05	2.905956e-05
0.392996	1.050291e-04	2.873164e-05
0.39345	7.348224e-05	2.889738e-05
0.393904	8.673544e-05	2.902508e-05
0.394358	6.281276e-05	2.892341e-05
0.394812	8.333063e-05	2.900765e-05
0.395266	7.026797e-05	2.880538e-05
0.39572	1.355507e-04	2.914743e-05
0.396174	2.947181e-05	2.886569e-05
0.396628	1.033703e-04	2.905008e-05
0.397082	5.969556e-05	2.897449e-05
0.397536	9.783268e-05	2.895688e-05
0.39799	8.950174e-05	2.915243e-05
0.398443	6.998555e-05	2.895935e-05
0.398897	5.712863e-05	2.910851e-05
0.399351	4.902530e-05	2.888826e-05
0.399805	1.020250e-04	2.912086e-05
0.400259	3.990980e-05	2.899869e-05
0.400713	1.198876e-04	2.909516e-05
0.401167	1.114939e-04	2.924251e-05
0.401621	1.249448e-04	2.898683e-05
0.402075	6.290931e-05	2.927504e-05
0.402528	9.557792e-05	2.906668e-05
0.402982	1.056784e-04	2.897637e-05
0.403436	7.361147e-05	2.922930e-05
0.40389	7.601495e-05	2.895425e-05
0.404344	7.186371e-05	2.942358e-05
0.404798	4.478650e-05	2.894550e-05
0.405251	1.009675e-04	2.914975e-05
0.405705	9.001926e-05	2.937817e-05
0.406159	4.308730e-05	2.895549e-05
0.406613	2.335302e-05	2.935441e-05
0.407067	4.637970e-05	2.893378e-05
0.40752	6.464546e-05	2.910702e-05
0.407974	9.177094e-05	2.922310e-05
0.408428	4.158811e-05	2.897097e-05
0.408882	8.109432e-05	2.911859e-05
0.409336	4.848520e-05	2.891566e-05
0.409789	6.888325e-05	2.913774e-05
0.410243	7.021476e-05	2.906289e-05
0.410697	9.716715e-05	2.893766e-05
0.411151	6.297620e-05	2.911667e-05
0.411604	8.678870e-05	2.882085e-05
0.412058	7.378802e-05	2.912560e-05
0.412512	6.552744e-05	2.888437e-05
0.412966	8.002027e-05	2.903405e-05
0.413419	1.230743e-04	2.911462e-05
0.413873	1.012522e-04	2.900539e-05
0.414327	6.895584e-05	2.907673e-05
0.414781	6.593094e-05	2.888939e-05
0.415234	7.973138e-05	2.913227e-05
0.415688	5.898517e-05	2.904509e-05
0.416142	1.005523e-04	2.921819e-05
0.416595	8.791909e-05	2.911877e-05
0.417049	1.529814e-04	2.897004e-05
0.417503	7.515634e-05	2.921171e-05
0.417956	6.674586e-05	2.901976e-05
0.41841	1.104456e-04	2.912118e-05
0.418864	4.986639e-05	2.917484e-05
0.419317	6.005267e-05	2.902475e-05
0.419771	5.750462e-05	2.931942e-05
0.420225	7.236141e-05	2.889910e-05
0.420678	6.187188e-05	2.929087e-05
0.421132	1.106669e-04	2.908999e-05
0.421586	-1.286365e-05	2.916148e-05
0.422039	4.500196e-05	2.918746e-05
0.422493	9.120566e-05	2.891383e-05
0.422947	3.885692e-05	2.931706e-05
0.4234	7.511267e-05	2.918698e-05
0.423854	1.092349e-04	2.929398e-05
0.424307	6.998490e-05	2.928496e-05
0.424761	7.483636e-05	2.903165e-05
0.425215	7.755404e-05	2.937730e-05
0.425668	1.384992e-04	2.914619e-05
0.426122	9.529512e-05	2.918592e-05
0.426575	1.091134e-04	2.927603e-05
0.427029	9.937186e-05	2.926683e-05
0.427483	1.162586e-04	2.949897e-05
0.427936	4.704612e-05	2.905145e-05
0.42839	5.371322e-05	2.930660e-05
0.428843	1.032299e-05	2.919486e-05
0.429297	4.314688e-05	2.926446e-05
0.42975	4.271383e-05	2.941174e-05
0.430204	1.367691e-04	2.914808e-05
0.430657	5.445890e-05	2.932980e-05
0.431111	8.373428e-05	2.924370e-05
0.431564	5.279275e-05	2.939781e-05
0.432018	1.059793e-04	2.938731e-05
0.432471	3.447445e-05	2.919560e-05
0.432925	6.689779e-05	2.959685e-05
0.433378	1.039744e-04	2.915356e-05
0.433832	1.117346e-04	2.936284e-05
0.434285	4.278468e-05	2.933614e-05
0.434739	4.983735e-05	2.936852e-05
0.435192	8.116225e-05	2.962051e-05
0.435646	7.162900e-05	2.905543e-05
0.436099	8.163500e-05	2.946045e-05
0.436553	4.587093e-05	2.931685e-05
0.437006	8.797206e-05	2.944090e-05
0.43746	1.098048e-04	2.958137e-05
0.437913	6.766126e-05	2.920234e-05
0.438367	6.960376e-05	2.956774e-05
0.43882	4.964321e-05	2.942588e-05
0.439273	1.211517e-04	2.939632e-05
0.439727	1.765069e-05	2.948047e-05
0.44018	9.687671e-05	2.942877e-05
0.440634	1.263245e-04	2.963399e-05
0.441087	5.509987e-05	2.945719e-05
0.441541	6.194323e-05	2.940713e-05
0.441994	8.363194e-05	2.939462e-05
0.442447	2.131265e-05	2.950630e-05
0.442901	6.058858e-05	2.969323e-05
0.443354	5.204200e-05	2.928405e-05
0.443807	8.822403e-05	2.954744e-05
0.444261	1.106871e-04	2.949135e-05
0.444714	4.941158e-05	2.960076e-05
0.445168	5.707622e-05	2.943043e-05
0.445621	3.146800e-05	2.955257e-05
0.446074	1.037667e-04	2.965581e-05
0.446528	9.436426e-05	2.945091e-05
0.446981	4.911594e-05	2.965232e-05
0.447434	9.408828e-05	2.945908e-05
0.447888	1.197381e-04	2.962938e-05
0.448341	6.107516e-05	2.971623e-05
0.448794	9.759161e-05	2.945123e-05
0.449247	8.893223e-05	2.975370e-05
0.449701	3.985123e-05	2.943728e-05
0.450154	1.362155e-04	2.972875e-05
0.450607	6.386833e-05	2.967513e-05
0.451061	8.624537e-05	2.937982e-05
0.451514	2.492424e-05	2.987180e-05
0.451967	6.186621e-05	2.940464e-05
0.45242	1.051820e-04	2.992335e-05
0.452874	5.199937e-05	2.944023e-05
0.453327	8.927015e-05	2.965473e-05
0.45378	1.168478e-04	2.995925e-05
0.454233	5.480727e-05	2.941921e-05
0.454687	8.869241e-05	2.979392e-05
0.45514	1.031496e-04	2.959486e-05
0.455593	6.332156e-05	2.972932e-05
0.456046	6.268928e-05	2.994439e-05
0.4565	8.013975e-05	2.942168e-05
0.456953	9.472475e-05	2.987037e-05
0.457406	4.345278e-05	2.971544e-05
0.457859	5.837560e-05	2.974635e-05
0.458312	6.157855e-05	2.990327e-05
0.458766	1.623351e-05	2.943766e-05
0.459219	3.436917e-05	2.983457e-05
0.459672	6.736875e-05	2.967113e-05
0.460125	4.679659e-05	2.987558e-05
0.460578	7.687101e-05	2.981430e-05
0.461031	4.635236e-05	2.974467e-05
0.461485	9.695212e-05	2.996239e-05
0.461938	6.844679e-05	2.958490e-05
0.462391	3.887609e-05	2.985023e-05
0.462844	5.879070e-05	2.971396e-05
0.463297	6.184019e-05	2.978559e-05
0.46375	2.454424e-05	2.994483e-05
0.464203	1.081924e-04	2.977980e-05
0.464657	7.743430e-05	2.994275e-05
0.46511	6.455742e-05	2.971139e-05
0.465563	1.101750e-04	3.004086e-05
0.466016	4.703878e-05	2.989427e-05
0.466469	3.404338e-05	3.053232e-05
0.466922	6.494953e-05	3.159581e-05
0.467375	9.082206e-05	3.185066e-05
0.467828	1.080226e-04	3.266098e-05
0.468281	4.001077e-05	3.269960e-05
0.468734	8.003701e-05	3.326627e-05
0.469187	7.067094e-05	3.395648e-05
0.46964	1.171863e-05	3.374715e-05
0.470093	5.184980e-05	3.440218e-05
0.470546	-5.335615e-05	3.442349e-05
0.470999	4.946831e-05	3.509945e-05
0.471452	8.466260e-05	3.551095e-05
0.471905	4.483600e-05	3.548993e-05
0.472359	4.862321e-05	3.614024e-05
0.472812	6.160465e-05	3.603140e-05
0.473265	1.473615e-04	3.673126e-05
0.473718	5.189861e-05	3.677585e-05
0.47417	2.238145e-05	3.700120e-05
0.474623	3.948880e-05	3.788672e-05
0.475076	-1.370722e-05	3.756785e-05
0.475529	9.628459e-05	3.825618e-05
0.475982	2.970970e-05	3.785009e-05
0.476435	1.252120e-04	3.886503e-05
0.476888	1.288056e-04	3.912449e-05
0.477341	7.556575e-05	3.946766e-05
0.477794	1.133530e-04	3.975097e-05
0.478247	5.688658e-05	3.925338e-05
0.4787	2.508882e-05	4.051390e-05
0.479153	2.483579e-05	4.008973e-05
0.479606	1.499662e-04	4.111135e-05
0.480059	7.332015e-05	4.078183e-05
0.480512	6.204260e-05	4.120840e-05
0.480965	8.180944e-05	4.186991e-05
0.481417	7.618355e-05	4.182526e-05
0.48187	6.711857e-05	4.201844e-05
0.482323	8.750089e-05	4.265475e-05
0.482776	5.241318e-05	4.312732e-05
0.483229	-2.092078e-05	4.338905e-05
0.483682	1.396072e-04	4.303632e-05
0.484135	1.507596e-04	4.341065e-05
0.484588	-6.858639e-06	4.402019e-05
0.48504	4.250722e-05	4.376017e-05
0.485493	-1.777613e-05	4.362339e-05
0.485946	4.802352e-05	4.388247e-05
0.486399	6.458802e-05	4.401040e-05
0.486852	7.594913e-05	4.428443e-05
0.487305	4.185723e-05	4.380569e-05
0.487757	1.647620e-05	4.419815e-05
0.48821	2.437610e-05	4.441228e-05
0.488663	1.152675e-04	4.469579e-05
0.489116	7.870771e-05	4.439500e-05
0.489569	6.762058e-05	4.421764e-05
0.490021	4.067968e-05	4.486359e-05
0.490474	4.137692e-05	4.465618e-05
0.490927	5.770381e-05	4.537070e-05
0.49138	1.155797e-04	4.477496e-05
0.491832	5.623684e-06	4.534724e-05
0.492285	6.642754e-05	4.546612e-05
0.492738	2.258031e-05	4.573213e-05
0.493191	6.721410e-05	4.546722e-05
0.493643	-3.943767e-06	4.585158e-05
0.494096	-2.354032e-05	4.619805e-05
0.494549	-7.611074e-06	4.640608e-05
0.495001	7.803942e-05	4.635770e-05
0.495454	7.644297e-06	4.644790e-05
0.495907	5.013293e-05	4.668657e-05
0.49636	1.081616e-04	4.749804e-05
0.496812	8.256982e-05	4.702219e-05
0.497265	3.725268e-05	4.710033e-05
0.497718	3.309226e-05	4.741493e-05
0.49817	7.880486e-05	4.804449e-05
0.498623	1.666746e-04	4.867011e-05
0.499076	9.662042e-05	4.748842e-05
0.499528	1.209658e-04	4.815133e-05
0.499981	1.002975e-04	4.842917e-05
0.500433	2.357784e-05	4.897264e-05
0.500886	1.682195e-04	4.865728e-05

## Sheet: RRM1-2 + (GU)6
US-SOMO: SAXS HPLC data: RRM1-2 + (GU)6
q	I(q)	sd		Figure 5-figure supplement 8a
0.0118585	1.161863e-02	1.242831e-04
0.0123146	1.160940e-02	1.194249e-04
0.0127707	1.176419e-02	1.163791e-04
0.0132268	1.176773e-02	1.139112e-04
0.0136829	1.187146e-02	1.105905e-04
0.014139	1.161014e-02	1.095784e-04
0.0145951	1.164426e-02	1.051304e-04
0.0150512	1.158153e-02	1.039832e-04
0.0155073	1.145401e-02	1.008962e-04
0.0159634	1.167390e-02	1.004202e-04
0.0164195	1.155112e-02	9.715211e-05
0.0168756	1.160069e-02	9.611111e-05
0.0173317	1.161426e-02	9.562560e-05
0.0177878	1.156728e-02	9.166445e-05
0.0182439	1.136769e-02	9.207575e-05
0.0187	1.134231e-02	8.951411e-05
0.0191561	1.140626e-02	8.818587e-05
0.0196122	1.139955e-02	8.735647e-05
0.0200683	1.131027e-02	8.609019e-05
0.0205243	1.139160e-02	8.554533e-05
0.0209804	1.125103e-02	8.297306e-05
0.0214365	1.127089e-02	8.269018e-05
0.0218926	1.123610e-02	8.093175e-05
0.0223487	1.112486e-02	7.983205e-05
0.0228048	1.120245e-02	8.013754e-05
0.0232609	1.103930e-02	7.810393e-05
0.023717	1.117899e-02	7.796455e-05
0.0241731	1.100449e-02	7.496607e-05
0.0246292	1.103952e-02	7.571349e-05
0.0250853	1.107026e-02	7.567349e-05
0.0255414	1.098091e-02	7.322551e-05
0.0259974	1.111160e-02	7.326816e-05
0.0264535	1.096527e-02	7.166359e-05
0.0269096	1.105754e-02	7.308671e-05
0.0273657	1.086243e-02	7.345761e-05
0.0278218	1.080207e-02	7.303532e-05
0.0282779	1.068715e-02	7.388684e-05
0.028734	1.078197e-02	7.260995e-05
0.0291901	1.062102e-02	7.312060e-05
0.0296461	1.065484e-02	7.258008e-05
0.0301022	1.058741e-02	7.163373e-05
0.0305583	1.035659e-02	7.237382e-05
0.0310144	1.070790e-02	7.154283e-05
0.0314705	1.062406e-02	7.187537e-05
0.0319266	1.041342e-02	7.015904e-05
0.0323827	1.055917e-02	7.074119e-05
0.0328387	1.040767e-02	6.994319e-05
0.0332948	1.036249e-02	6.955798e-05
0.0337509	1.054680e-02	7.035478e-05
0.034207	1.028877e-02	6.817354e-05
0.0346631	1.025740e-02	6.890872e-05
0.0351191	1.015001e-02	6.774190e-05
0.0355752	1.022255e-02	6.798026e-05
0.0360313	9.947234e-03	6.763810e-05
0.0364874	1.018130e-02	6.595046e-05
0.0369435	1.007479e-02	6.729755e-05
0.0373996	9.947864e-03	6.639334e-05
0.0378556	9.854874e-03	6.574502e-05
0.0383117	9.860012e-03	6.529109e-05
0.0387678	9.922618e-03	6.492316e-05
0.0392239	9.787247e-03	6.511974e-05
0.0396799	9.777528e-03	6.402645e-05
0.040136	9.772626e-03	6.366052e-05
0.0405921	9.636043e-03	6.406276e-05
0.0410482	9.605629e-03	6.277490e-05
0.0415042	9.570684e-03	6.324188e-05
0.0419603	9.440817e-03	6.239851e-05
0.0424164	9.465283e-03	6.240087e-05
0.0428725	9.353204e-03	6.236191e-05
0.0433285	9.408464e-03	6.109633e-05
0.0437846	9.200802e-03	6.162818e-05
0.0442407	9.144391e-03	5.963466e-05
0.0446968	8.981004e-03	6.088466e-05
0.0451528	9.263807e-03	6.069750e-05
0.0456089	9.241279e-03	5.930262e-05
0.046065	9.106308e-03	5.981006e-05
0.046521	9.060030e-03	5.912964e-05
0.0469771	9.083539e-03	5.941501e-05
0.0474332	8.944710e-03	5.844182e-05
0.0478892	8.881877e-03	5.819026e-05
0.0483453	8.695076e-03	5.828636e-05
0.0488014	8.517508e-03	5.760482e-05
0.0492574	8.626201e-03	5.781003e-05
0.0497135	8.597588e-03	5.644422e-05
0.0501696	8.547792e-03	5.665670e-05
0.0506256	8.489571e-03	5.709667e-05
0.0510817	8.433914e-03	5.620578e-05
0.0515377	8.364045e-03	5.597478e-05
0.0519938	8.381215e-03	5.510592e-05
0.0524499	8.276722e-03	5.586403e-05
0.0529059	8.236539e-03	5.536419e-05
0.053362	8.283795e-03	5.484651e-05
0.053818	8.164880e-03	5.451478e-05
0.0542741	8.083545e-03	5.444534e-05
0.0547302	7.926868e-03	5.470815e-05
0.0551862	7.979213e-03	5.327988e-05
0.0556423	7.711270e-03	5.340852e-05
0.0560983	7.842407e-03	5.370155e-05
0.0565544	7.768148e-03	5.337973e-05
0.0570104	7.621619e-03	5.281616e-05
0.0574665	7.580539e-03	5.237686e-05
0.0579225	7.559093e-03	5.237324e-05
0.0583786	7.521524e-03	5.217430e-05
0.0588346	7.450300e-03	5.202551e-05
0.0592907	7.411401e-03	5.186969e-05
0.0597467	7.467987e-03	5.119526e-05
0.0602028	7.329540e-03	5.161414e-05
0.0606588	7.228328e-03	5.104483e-05
0.0611149	7.253276e-03	5.067392e-05
0.0615709	7.182175e-03	5.050182e-05
0.062027	7.097326e-03	5.027827e-05
0.062483	7.125595e-03	5.071861e-05
0.0629391	7.133069e-03	4.976986e-05
0.0633951	6.982387e-03	4.965123e-05
0.0638512	6.966234e-03	4.939080e-05
0.0643072	6.808299e-03	4.956589e-05
0.0647632	6.844963e-03	4.923210e-05
0.0652193	6.641945e-03	4.883532e-05
0.0656753	6.684160e-03	4.880498e-05
0.0661314	6.613971e-03	4.846739e-05
0.0665874	6.644931e-03	4.822038e-05
0.0670434	6.576411e-03	4.785675e-05
0.0674995	6.500596e-03	4.761565e-05
0.0679555	6.428526e-03	4.828677e-05
0.0684115	6.302344e-03	4.721276e-05
0.0688676	6.258292e-03	4.726215e-05
0.0693236	6.306253e-03	4.670794e-05
0.0697796	6.190980e-03	4.676729e-05
0.0702357	6.147124e-03	4.738813e-05
0.0706917	6.024600e-03	4.602288e-05
0.0711477	6.027066e-03	4.658635e-05
0.0716038	5.881778e-03	4.609040e-05
0.0720598	5.871492e-03	4.581843e-05
0.0725158	5.807243e-03	4.586191e-05
0.0729718	5.898489e-03	4.538686e-05
0.0734279	5.730027e-03	4.562624e-05
0.0738839	5.781792e-03	4.529685e-05
0.0743399	5.652739e-03	4.524062e-05
0.0747959	5.647520e-03	4.496051e-05
0.0752519	5.533892e-03	4.438824e-05
0.075708	5.522211e-03	4.504012e-05
0.076164	5.436901e-03	4.453338e-05
0.07662	5.425122e-03	4.436467e-05
0.077076	5.392302e-03	4.391882e-05
0.077532	5.250968e-03	4.376311e-05
0.077988	5.245422e-03	4.384096e-05
0.0784441	5.149580e-03	4.356936e-05
0.0789001	5.165708e-03	4.367475e-05
0.0793561	5.052599e-03	4.349444e-05
0.0798121	5.008850e-03	4.316541e-05
0.0802681	5.086072e-03	4.309321e-05
0.0807241	4.778846e-03	4.265139e-05
0.0811801	4.856067e-03	4.302662e-05
0.0816361	4.853504e-03	4.252347e-05
0.0820921	4.783285e-03	4.263512e-05
0.0825481	4.801194e-03	4.225441e-05
0.0830041	4.696103e-03	4.194011e-05
0.0834601	4.611979e-03	4.207133e-05
0.0839161	4.600794e-03	4.173888e-05
0.0843721	4.527809e-03	4.183944e-05
0.0848281	4.485158e-03	4.126914e-05
0.0852841	4.575189e-03	4.159447e-05
0.0857401	4.506802e-03	4.149136e-05
0.0861961	4.387493e-03	4.077168e-05
0.0866521	4.372599e-03	4.121154e-05
0.0871081	4.298950e-03	4.066209e-05
0.0875641	4.226690e-03	4.093530e-05
0.0880201	4.200356e-03	4.064033e-05
0.0884761	4.089950e-03	4.000778e-05
0.0889321	4.166913e-03	4.047955e-05
0.0893881	4.040286e-03	4.001745e-05
0.0898441	4.042462e-03	4.022539e-05
0.0903	4.038498e-03	4.063231e-05
0.090756	3.949621e-03	4.078930e-05
0.091212	3.923224e-03	4.168598e-05
0.091668	3.856887e-03	4.160654e-05
0.092124	3.781001e-03	4.196022e-05
0.09258	3.854876e-03	4.175210e-05
0.0930359	3.715861e-03	4.219201e-05
0.0934919	3.669535e-03	4.246187e-05
0.0939479	3.717477e-03	4.216885e-05
0.0944039	3.560620e-03	4.263602e-05
0.0948598	3.621825e-03	4.218425e-05
0.0953158	3.564465e-03	4.258516e-05
0.0957718	3.556560e-03	4.267541e-05
0.0962278	3.493048e-03	4.250201e-05
0.0966837	3.360173e-03	4.287396e-05
0.0971397	3.354165e-03	4.261963e-05
0.0975957	3.364137e-03	4.302881e-05
0.0980516	3.352382e-03	4.298632e-05
0.0985076	3.230332e-03	4.249459e-05
0.0989636	3.310809e-03	4.231106e-05
0.0994195	3.283583e-03	4.112406e-05
0.0998755	3.167266e-03	4.107395e-05
0.100331	3.119906e-03	4.017229e-05
0.100787	3.075833e-03	4.047703e-05
0.101243	3.022124e-03	3.983004e-05
0.101699	3.038678e-03	3.952879e-05
0.102155	3.057015e-03	3.950424e-05
0.102611	2.946942e-03	3.919650e-05
0.103067	2.929335e-03	3.883405e-05
0.103523	2.832009e-03	3.881252e-05
0.103979	2.899626e-03	3.845480e-05
0.104435	2.754474e-03	3.839385e-05
0.104891	2.751359e-03	3.825693e-05
0.105347	2.762514e-03	3.811251e-05
0.105803	2.707994e-03	3.762717e-05
0.106259	2.680264e-03	3.785541e-05
0.106715	2.627223e-03	3.764720e-05
0.107171	2.678273e-03	3.756114e-05
0.107627	2.582571e-03	3.745272e-05
0.108083	2.497572e-03	3.799508e-05
0.108538	2.546796e-03	3.872514e-05
0.108994	2.479886e-03	3.860395e-05
0.10945	2.412548e-03	3.914344e-05
0.109906	2.440497e-03	3.888874e-05
0.110362	2.438875e-03	3.823566e-05
0.110818	2.390781e-03	3.790769e-05
0.111274	2.339703e-03	3.711665e-05
0.11173	2.264760e-03	3.707070e-05
0.112186	2.231816e-03	3.672527e-05
0.112642	2.309929e-03	3.664492e-05
0.113098	2.229645e-03	3.642921e-05
0.113554	2.130333e-03	3.586807e-05
0.11401	2.188811e-03	3.604012e-05
0.114466	2.178300e-03	3.592929e-05
0.114921	2.068239e-03	3.555698e-05
0.115377	2.040732e-03	3.579215e-05
0.115833	2.026742e-03	3.509878e-05
0.116289	2.003623e-03	3.581584e-05
0.116745	1.986732e-03	3.508703e-05
0.117201	1.981153e-03	3.497790e-05
0.117657	1.994270e-03	3.502486e-05
0.118113	2.015291e-03	3.478620e-05
0.118569	1.893132e-03	3.511691e-05
0.119025	1.824775e-03	3.455269e-05
0.119481	1.910285e-03	3.457486e-05
0.119936	1.783169e-03	3.454485e-05
0.120392	1.830148e-03	3.434110e-05
0.120848	1.715877e-03	3.448693e-05
0.121304	1.755145e-03	3.402226e-05
0.12176	1.809348e-03	3.417779e-05
0.122216	1.722904e-03	3.419224e-05
0.122672	1.717549e-03	3.365278e-05
0.123128	1.750526e-03	3.389143e-05
0.123584	1.715648e-03	3.369942e-05
0.124039	1.695010e-03	3.383410e-05
0.124495	1.548133e-03	3.354832e-05
0.124951	1.549104e-03	3.344916e-05
0.125407	1.623269e-03	3.328793e-05
0.125863	1.600188e-03	3.335082e-05
0.126319	1.628667e-03	3.341259e-05
0.126775	1.510404e-03	3.310659e-05
0.127231	1.559307e-03	3.333879e-05
0.127686	1.527991e-03	3.404533e-05
0.128142	1.408839e-03	3.422004e-05
0.128598	1.468025e-03	3.436161e-05
0.129054	1.376310e-03	3.443389e-05
0.12951	1.406002e-03	3.469228e-05
0.129966	1.395623e-03	3.501253e-05
0.130422	1.411660e-03	3.497739e-05
0.130878	1.309443e-03	3.477154e-05
0.131333	1.353455e-03	3.474963e-05
0.131789	1.288803e-03	3.492192e-05
0.132245	1.253885e-03	3.497160e-05
0.132701	1.258336e-03	3.467154e-05
0.133157	1.270279e-03	3.490679e-05
0.133613	1.163887e-03	3.472493e-05
0.134069	1.174966e-03	3.477365e-05
0.134524	1.209448e-03	3.479170e-05
0.13498	1.239607e-03	3.474403e-05
0.135436	1.152087e-03	3.480165e-05
0.135892	1.168068e-03	3.477398e-05
0.136348	1.132037e-03	3.456232e-05
0.136804	1.119609e-03	3.462407e-05
0.137259	1.088271e-03	3.465832e-05
0.137715	1.056540e-03	3.481123e-05
0.138171	1.087944e-03	3.444720e-05
0.138627	1.122657e-03	3.461041e-05
0.139083	1.070176e-03	3.459107e-05
0.139539	1.076501e-03	3.467934e-05
0.139994	1.050127e-03	3.439548e-05
0.14045	9.990500e-04	3.448592e-05
0.140906	1.084576e-03	3.430246e-05
0.141362	1.070755e-03	3.447877e-05
0.141818	1.019855e-03	3.432348e-05
0.142274	9.413065e-04	3.388205e-05
0.142729	1.020987e-03	3.428797e-05
0.143185	9.233362e-04	3.411556e-05
0.143641	9.666234e-04	3.423875e-05
0.144097	9.533470e-04	3.407770e-05
0.144553	8.851095e-04	3.382630e-05
0.145008	9.125892e-04	3.416383e-05
0.145464	9.428118e-04	3.394170e-05
0.14592	8.238043e-04	3.403945e-05
0.146376	9.194316e-04	3.406871e-05
0.146832	9.520367e-04	3.386354e-05
0.147287	9.032823e-04	3.414583e-05
0.147743	8.255617e-04	3.376287e-05
0.148199	8.739168e-04	3.408784e-05
0.148655	8.533715e-04	3.392994e-05
0.149111	7.699273e-04	3.387588e-05
0.149566	7.848616e-04	3.389130e-05
0.150022	7.989566e-04	3.378029e-05
0.150478	8.037747e-04	3.381901e-05
0.150934	7.994430e-04	3.371507e-05
0.15139	7.198817e-04	3.369695e-05
0.151845	7.015564e-04	3.368582e-05
0.152301	8.003504e-04	3.361237e-05
0.152757	6.956384e-04	3.383668e-05
0.153213	7.759269e-04	3.357342e-05
0.153668	6.583324e-04	3.358461e-05
0.154124	6.666331e-04	3.352828e-05
0.15458	6.969055e-04	3.351408e-05
0.155036	7.279066e-04	3.357610e-05
0.155491	6.607633e-04	3.331505e-05
0.155947	7.274034e-04	3.356215e-05
0.156403	6.806772e-04	3.309143e-05
0.156859	6.717924e-04	3.347673e-05
0.157315	6.226035e-04	3.326751e-05
0.15777	6.046541e-04	3.312829e-05
0.158226	7.284143e-04	3.325251e-05
0.158682	7.528560e-04	3.287303e-05
0.159138	6.401030e-04	3.305484e-05
0.159593	6.287420e-04	3.287935e-05
0.160049	6.411750e-04	3.266198e-05
0.160505	6.114804e-04	3.291461e-05
0.16096	5.403359e-04	3.256241e-05
0.161416	6.296545e-04	3.275425e-05
0.161872	5.807797e-04	3.248411e-05
0.162328	5.781190e-04	3.246453e-05
0.162783	5.972531e-04	3.283540e-05
0.163239	5.282543e-04	3.234677e-05
0.163695	5.057013e-04	3.259943e-05
0.164151	5.676933e-04	3.238235e-05
0.164606	5.210435e-04	3.249340e-05
0.165062	5.066912e-04	3.241477e-05
0.165518	5.159266e-04	3.237236e-05
0.165973	5.192233e-04	3.231255e-05
0.166429	5.231393e-04	3.221981e-05
0.166885	4.463290e-04	3.239686e-05
0.167341	5.303207e-04	3.224162e-05
0.167796	4.437933e-04	3.202483e-05
0.168252	5.199947e-04	3.241333e-05
0.168708	5.112959e-04	3.227188e-05
0.169163	4.603084e-04	3.221800e-05
0.169619	4.814867e-04	3.201187e-05
0.170075	4.527820e-04	3.203412e-05
0.170531	4.288597e-04	3.219488e-05
0.170986	4.209166e-04	3.185813e-05
0.171442	5.011776e-04	3.232194e-05
0.171898	4.709190e-04	3.168947e-05
0.172353	5.137308e-04	3.220519e-05
0.172809	4.738945e-04	3.188732e-05
0.173265	4.393144e-04	3.185332e-05
0.17372	4.798170e-04	3.187185e-05
0.174176	4.384339e-04	3.175683e-05
0.174632	4.439461e-04	3.207095e-05
0.175087	4.347034e-04	3.170801e-05
0.175543	3.858826e-04	3.172746e-05
0.175999	4.282042e-04	3.179748e-05
0.176454	4.842724e-04	3.171713e-05
0.17691	3.943722e-04	3.184449e-05
0.177366	4.081303e-04	3.146634e-05
0.177821	3.702425e-04	3.171906e-05
0.178277	3.493542e-04	3.166284e-05
0.178733	3.720632e-04	3.136646e-05
0.179188	4.033760e-04	3.177065e-05
0.179644	3.788098e-04	3.144538e-05
0.1801	3.410509e-04	3.167407e-05
0.180555	3.448535e-04	3.153629e-05
0.181011	3.445244e-04	3.115663e-05
0.181467	3.292029e-04	3.153194e-05
0.181922	3.991899e-04	3.126281e-05
0.182378	3.195291e-04	3.144225e-05
0.182834	4.126181e-04	3.145655e-05
0.183289	3.902902e-04	3.111145e-05
0.183745	3.576782e-04	3.163232e-05
0.1842	2.209695e-04	3.094307e-05
0.184656	3.782603e-04	3.129624e-05
0.185112	3.021636e-04	3.120731e-05
0.185567	3.408362e-04	3.117871e-05
0.186023	3.361968e-04	3.141369e-05
0.186479	2.771567e-04	3.101156e-05
0.186934	3.921084e-04	3.116514e-05
0.18739	2.980000e-04	3.104167e-05
0.187845	2.786961e-04	3.105528e-05
0.188301	2.977338e-04	3.111770e-05
0.188757	3.301106e-04	3.095336e-05
0.189212	2.535891e-04	3.100366e-05
0.189668	2.536615e-04	3.085125e-05
0.190123	2.847636e-04	3.103145e-05
0.190579	3.638135e-04	3.092454e-05
0.191035	2.403152e-04	3.088001e-05
0.19149	2.408177e-04	3.099687e-05
0.191946	2.711501e-04	3.067510e-05
0.192401	2.952673e-04	3.084839e-05
0.192857	3.415101e-04	3.074054e-05
0.193313	3.241676e-04	3.083276e-05
0.193768	2.721951e-04	3.090001e-05
0.194224	3.243283e-04	3.048746e-05
0.194679	2.551225e-04	3.080771e-05
0.195135	2.077641e-04	3.068462e-05
0.19559	2.511023e-04	3.056603e-05
0.196046	2.776020e-04	3.060719e-05
0.196502	1.809853e-04	3.056875e-05
0.196957	2.883410e-04	3.068508e-05
0.197413	2.072646e-04	3.055321e-05
0.197868	2.018127e-04	3.054866e-05
0.198324	2.588066e-04	3.044412e-05
0.198779	2.314768e-04	3.029343e-05
0.199235	2.263409e-04	3.061897e-05
0.19969	1.695812e-04	3.044676e-05
0.200146	3.019530e-04	3.039572e-05
0.200601	1.926324e-04	3.026676e-05
0.201057	2.826024e-04	3.037180e-05
0.201513	2.654968e-04	3.041284e-05
0.201968	2.414922e-04	3.030002e-05
0.202424	2.527774e-04	3.033015e-05
0.202879	2.174730e-04	3.022958e-05
0.203335	2.545536e-04	3.039265e-05
0.20379	1.451521e-04	3.013669e-05
0.204246	2.610368e-04	3.022162e-05
0.204701	2.285146e-04	3.021137e-05
0.205157	1.434525e-04	3.003146e-05
0.205612	3.482063e-04	3.036252e-05
0.206068	2.548661e-04	3.001994e-05
0.206523	2.170231e-04	3.009546e-05
0.206979	1.748472e-04	3.015106e-05
0.207434	2.220911e-04	2.995473e-05
0.20789	1.255494e-04	3.010757e-05
0.208345	1.298640e-04	2.976961e-05
0.208801	1.769339e-04	3.015513e-05
0.209256	2.144123e-04	2.990246e-05
0.209712	1.930278e-04	2.985895e-05
0.210167	1.918675e-04	3.006373e-05
0.210623	1.896217e-04	2.969948e-05
0.211078	1.997444e-04	2.999473e-05
0.211534	1.983639e-04	2.989473e-05
0.211989	2.622661e-04	2.984553e-05
0.212445	1.919237e-04	2.986495e-05
0.2129	2.186573e-04	2.965106e-05
0.213356	1.023280e-04	2.996218e-05
0.213811	2.174475e-04	2.977283e-05
0.214267	1.260493e-04	2.965620e-05
0.214722	1.519330e-04	2.979497e-05
0.215177	1.630462e-04	2.954827e-05
0.215633	1.320535e-04	2.965121e-05
0.216088	1.855930e-04	3.011905e-05
0.216544	1.876509e-04	3.079229e-05
0.216999	1.855380e-04	3.105607e-05
0.217455	1.778970e-04	3.122321e-05
0.21791	1.430336e-04	3.136551e-05
0.218366	1.779430e-04	3.173172e-05
0.218821	1.089052e-04	3.197893e-05
0.219276	1.153151e-04	3.199360e-05
0.219732	1.447666e-04	3.223043e-05
0.220187	1.559114e-04	3.244384e-05
0.220643	1.523871e-04	3.253341e-05
0.221098	1.216684e-04	3.281196e-05
0.221554	1.628090e-04	3.268866e-05
0.222009	1.578511e-04	3.308586e-05
0.222464	1.238829e-04	3.311450e-05
0.22292	1.417584e-04	3.329724e-05
0.223375	1.135388e-04	3.351460e-05
0.223831	1.445071e-04	3.315888e-05
0.224286	1.448903e-04	3.387573e-05
0.224741	1.575720e-04	3.299420e-05
0.225197	1.716588e-04	3.245355e-05
0.225652	1.884081e-04	3.240056e-05
0.226108	1.626880e-04	3.172050e-05
0.226563	1.388089e-04	3.182686e-05
0.227018	2.254212e-04	3.153360e-05
0.227474	1.276713e-04	3.153890e-05
0.227929	1.178703e-04	3.144265e-05
0.228385	7.535042e-05	3.125625e-05
0.22884	6.453223e-05	3.108286e-05
0.229295	1.531451e-04	3.088151e-05
0.229751	1.334149e-04	3.094350e-05
0.230206	1.565522e-04	3.099155e-05
0.230661	5.365615e-05	3.073167e-05
0.231117	7.654834e-05	3.086881e-05
0.231572	2.775174e-05	3.044877e-05
0.232027	1.462851e-04	3.074942e-05
0.232483	1.708692e-04	3.052619e-05
0.232938	1.024397e-04	3.050301e-05
0.233393	4.059524e-05	3.038386e-05
0.233849	1.046661e-04	3.041758e-05
0.234304	1.479858e-04	3.052755e-05
0.234759	7.146564e-05	3.007419e-05
0.235215	1.412770e-04	3.035624e-05
0.23567	1.467088e-04	3.032262e-05
0.236125	1.457069e-04	3.024499e-05
0.236581	1.169602e-04	3.015849e-05
0.237036	7.197622e-05	2.990716e-05
0.237491	1.476565e-04	3.003798e-05
0.237947	4.733468e-05	2.997942e-05
0.238402	6.797834e-05	3.001115e-05
0.238857	1.021395e-04	3.000700e-05
0.239313	1.373602e-04	2.971007e-05
0.239768	1.615554e-04	3.005160e-05
0.240223	1.127580e-04	2.959691e-05
0.240679	9.673300e-05	2.983175e-05
0.241134	9.146048e-05	2.983418e-05
0.241589	1.229770e-04	2.965357e-05
0.242044	9.270685e-05	2.971056e-05
0.2425	6.690550e-05	2.944244e-05
0.242955	2.560200e-05	2.957483e-05
0.24341	1.412597e-04	2.939669e-05
0.243866	1.473964e-04	2.949795e-05
0.244321	1.735888e-04	2.949412e-05
0.244776	1.989157e-05	2.920608e-05
0.245231	6.707019e-05	2.949082e-05
0.245687	1.238329e-04	2.929246e-05
0.246142	9.990276e-05	2.926746e-05
0.246597	1.042568e-04	2.932761e-05
0.247052	1.812333e-05	2.929283e-05
0.247508	1.265212e-04	2.931742e-05
0.247963	6.183175e-05	2.901286e-05
0.248418	5.419573e-05	2.912266e-05
0.248873	4.532611e-05	2.898953e-05
0.249329	7.691112e-05	2.919794e-05
0.249784	8.533157e-05	2.919683e-05
0.250239	4.874125e-05	2.902295e-05
0.250694	9.487438e-05	2.907503e-05
0.25115	9.273382e-05	2.896687e-05
0.251605	5.897117e-05	2.901313e-05
0.25206	9.680827e-05	2.886141e-05
0.252515	1.305135e-04	2.875311e-05
0.25297	1.183818e-04	2.888383e-05
0.253426	9.873249e-05	2.876051e-05
0.253881	1.585821e-04	2.877573e-05
0.254336	5.117743e-05	2.857866e-05
0.254791	1.249615e-04	2.845051e-05
0.255246	1.657281e-04	2.869520e-05
0.255702	1.099226e-04	2.842787e-05
0.256157	8.050751e-05	2.852030e-05
0.256612	8.299863e-05	2.821977e-05
0.257067	8.878477e-05	2.840132e-05
0.257522	8.839923e-05	2.845815e-05
0.257978	9.357208e-05	2.799388e-05
0.258433	6.362900e-05	2.838076e-05
0.258888	3.210009e-05	2.797674e-05
0.259343	8.972861e-05	2.830733e-05
0.259798	1.220409e-04	2.804891e-05
0.260253	1.597296e-04	2.802129e-05
0.260709	4.956055e-05	2.821549e-05
0.261164	4.834295e-05	2.803785e-05
0.261619	7.646658e-05	2.805924e-05
0.262074	5.458488e-05	2.798585e-05
0.262529	1.008536e-04	2.802724e-05
0.262984	1.109585e-04	2.810604e-05
0.263439	1.033440e-04	2.781586e-05
0.263895	3.609563e-05	2.806120e-05
0.26435	2.459157e-05	2.782669e-05
0.264805	1.072902e-04	2.799853e-05
0.26526	1.457573e-04	2.805544e-05
0.265715	7.262910e-05	2.770697e-05
0.26617	9.128557e-05	2.782241e-05
0.266625	1.218701e-04	2.780034e-05
0.26708	5.170733e-05	2.794267e-05
0.267536	9.278109e-05	2.768366e-05
0.267991	6.345480e-05	2.779366e-05
0.268446	1.053049e-04	2.783422e-05
0.268901	1.665145e-05	2.769936e-05
0.269356	8.818306e-05	2.771894e-05
0.269811	7.243609e-05	2.772828e-05
0.270266	2.818769e-05	2.764624e-05
0.270721	7.624394e-05	2.783662e-05
0.271176	4.163540e-05	2.741233e-05
0.271631	3.734501e-05	2.765936e-05
0.272086	3.179824e-05	2.746896e-05
0.272541	8.731510e-05	2.771570e-05
0.272997	4.169248e-05	2.765240e-05
0.273452	4.500909e-05	2.740739e-05
0.273907	9.100915e-05	2.756309e-05
0.274362	1.008801e-04	2.745307e-05
0.274817	4.789992e-05	2.754155e-05
0.275272	7.063619e-05	2.750319e-05
0.275727	5.512829e-05	2.740199e-05
0.276182	1.264509e-04	2.764220e-05
0.276637	2.281460e-05	2.730830e-05
0.277092	1.242132e-04	2.733384e-05
0.277547	7.700483e-05	2.744470e-05
0.278002	4.984937e-05	2.728449e-05
0.278457	5.943915e-05	2.750539e-05
0.278912	6.806385e-05	2.728584e-05
0.279367	6.291267e-05	2.744092e-05
0.279822	5.864164e-05	2.712465e-05
0.280277	5.654506e-05	2.736316e-05
0.280732	5.648417e-05	2.718284e-05
0.281187	2.146016e-05	2.727530e-05
0.281642	7.677609e-06	2.727944e-05
0.282097	4.590666e-05	2.714757e-05
0.282552	1.148751e-04	2.725118e-05
0.283007	3.873314e-05	2.703206e-05
0.283462	3.731216e-05	2.725932e-05
0.283917	8.954861e-05	2.725703e-05
0.284372	6.100021e-05	2.704251e-05
0.284827	1.109993e-04	2.717147e-05
0.285282	4.355558e-05	2.697249e-05
0.285737	4.704046e-05	2.709916e-05
0.286192	6.058324e-05	2.709785e-05
0.286647	9.888727e-05	2.708851e-05
0.287102	3.907621e-05	2.713594e-05
0.287557	8.117241e-05	2.689788e-05
0.288012	3.882441e-05	2.698146e-05
0.288467	1.059841e-04	2.693745e-05
0.288922	9.675254e-05	2.696374e-05
0.289377	1.007325e-04	2.709590e-05
0.289832	8.351086e-05	2.677693e-05
0.290286	9.760325e-05	2.703328e-05
0.290741	7.186582e-05	2.679849e-05
0.291196	1.844789e-05	2.686355e-05
0.291651	7.689960e-05	2.694286e-05
0.292106	7.169939e-05	2.680679e-05
0.292561	8.316986e-05	2.686594e-05
0.293016	9.552813e-05	2.677440e-05
0.293471	1.104473e-04	2.679307e-05
0.293926	1.033323e-04	2.684443e-05
0.294381	-5.784152e-07	2.669365e-05
0.294836	8.679836e-05	2.691862e-05
0.29529	7.184458e-05	2.655241e-05
0.295745	9.154400e-05	2.674740e-05
0.2962	6.995956e-05	2.656610e-05
0.296655	7.699094e-05	2.673183e-05
0.29711	9.881166e-05	2.670978e-05
0.297565	2.129561e-05	2.653746e-05
0.29802	4.157593e-05	2.671477e-05
0.298475	1.250500e-04	2.651427e-05
0.298929	6.029665e-05	2.664300e-05
0.299384	6.306492e-05	2.648894e-05
0.299839	8.391434e-05	2.659196e-05
0.300294	9.443856e-05	2.662403e-05
0.300749	4.878969e-05	2.646431e-05
0.301204	1.028284e-04	2.659353e-05
0.301659	1.116582e-04	2.650514e-05
0.302113	7.280849e-05	2.641626e-05
0.302568	6.525983e-05	2.659481e-05
0.303023	9.324267e-05	2.633679e-05
0.303478	1.024859e-04	2.653529e-05
0.303933	7.932313e-05	2.628957e-05
0.304388	9.255728e-05	2.644925e-05
0.304842	1.072249e-05	2.635899e-05
0.305297	4.401953e-05	2.639652e-05
0.305752	1.075495e-04	2.642050e-05
0.306207	1.130930e-04	2.635402e-05
0.306662	8.894827e-05	2.630745e-05
0.307116	7.889248e-05	2.633616e-05
0.307571	5.381816e-05	2.624778e-05
0.308026	5.520088e-05	2.631231e-05
0.308481	2.668814e-05	2.624184e-05
0.308935	2.589024e-05	2.621632e-05
0.30939	1.105316e-04	2.631513e-05
0.309845	5.290572e-05	2.615637e-05
0.3103	2.058200e-05	2.617355e-05
0.310755	4.095826e-05	2.611220e-05
0.311209	5.580517e-05	2.623086e-05
0.311664	8.217613e-05	2.618096e-05
0.312119	6.776146e-05	2.618662e-05
0.312574	8.990389e-05	2.614816e-05
0.313028	1.766943e-05	2.618323e-05
0.313483	5.514319e-05	2.606706e-05
0.313938	4.955384e-05	2.605741e-05
0.314392	1.274753e-04	2.617105e-05
0.314847	9.969232e-05	2.602841e-05
0.315302	1.014510e-04	2.605258e-05
0.315757	6.508442e-05	2.607470e-05
0.316211	1.270188e-04	2.597189e-05
0.316666	1.219061e-04	2.611173e-05
0.317121	2.045907e-05	2.593119e-05
0.317575	5.183079e-05	2.598315e-05
0.31803	4.432001e-05	2.592687e-05
0.318485	7.248059e-05	2.594078e-05
0.31894	1.874120e-05	2.595931e-05
0.319394	4.827237e-05	2.580225e-05
0.319849	6.873710e-05	2.597562e-05
0.320304	6.256244e-05	2.593824e-05
0.320758	5.753384e-05	2.583463e-05
0.321213	7.585157e-05	2.594658e-05
0.321668	9.257307e-05	2.574313e-05
0.322122	1.209707e-04	2.582496e-05
0.322577	1.263142e-04	2.584333e-05
0.323032	-8.969316e-06	2.578600e-05
0.323486	1.071156e-04	2.586881e-05
0.323941	1.008113e-04	2.576578e-05
0.324396	6.751629e-05	2.585521e-05
0.32485	4.948974e-05	2.558853e-05
0.325305	1.052299e-04	2.580184e-05
0.325759	9.992780e-05	2.570192e-05
0.326214	8.212237e-05	2.566943e-05
0.326669	7.036084e-05	2.583273e-05
0.327123	5.371220e-05	2.556082e-05
0.327578	1.075320e-04	2.576212e-05
0.328033	1.454583e-04	2.559850e-05
0.328487	3.048419e-05	2.563736e-05
0.328942	1.009301e-04	2.572902e-05
0.329396	7.414809e-05	2.553902e-05
0.329851	6.715242e-05	2.565175e-05
0.330306	5.565552e-05	2.548666e-05
0.33076	6.935709e-05	2.558047e-05
0.331215	1.090581e-04	2.561100e-05
0.331669	6.305695e-05	2.554620e-05
0.332124	1.141603e-04	2.565190e-05
0.332578	1.013222e-04	2.542253e-05
0.333033	5.963392e-05	2.556217e-05
0.333488	4.767065e-05	2.536412e-05
0.333942	-1.429527e-05	2.553477e-05
0.334397	9.042302e-05	2.560721e-05
0.334851	4.891280e-05	2.524901e-05
0.335306	5.662876e-05	2.559290e-05
0.33576	4.587204e-05	2.533676e-05
0.336215	1.006740e-04	2.539459e-05
0.336669	6.414110e-05	2.538778e-05
0.337124	7.291636e-05	2.543390e-05
0.337578	2.268556e-05	2.533532e-05
0.338033	7.157608e-05	2.537690e-05
0.338487	1.151534e-04	2.538354e-05
0.338942	7.993044e-05	2.532667e-05
0.339396	9.073511e-05	2.531613e-05
0.339851	5.940059e-05	2.534001e-05
0.340305	1.027646e-04	2.526706e-05
0.34076	1.102661e-04	2.543879e-05
0.341214	6.134887e-05	2.560254e-05
0.341669	8.924213e-05	2.606701e-05
0.342123	4.215513e-05	2.646722e-05
0.342578	7.455423e-05	2.648574e-05
0.343032	8.278868e-05	2.687367e-05
0.343487	7.959565e-05	2.675073e-05
0.343941	9.587207e-05	2.714132e-05
0.344396	6.278661e-05	2.755317e-05
0.34485	9.783664e-05	2.827200e-05
0.345305	8.640851e-05	2.904315e-05
0.345759	1.785746e-05	2.896699e-05
0.346213	9.746016e-05	2.962650e-05
0.346668	4.744261e-05	2.964549e-05
0.347122	-1.324327e-06	2.968019e-05
0.347577	-1.969654e-05	3.031079e-05
0.348031	-2.701795e-05	3.014194e-05
0.348486	3.677715e-05	3.083935e-05
0.34894	2.829574e-05	3.064438e-05
0.349394	6.361687e-05	3.109216e-05
0.349849	5.616555e-05	3.062484e-05
0.350303	8.168966e-05	2.995996e-05
0.350758	1.278476e-04	3.013896e-05
0.351212	8.245754e-05	2.965365e-05
0.351666	6.098327e-05	2.980701e-05
0.352121	1.222840e-04	2.957890e-05
0.352575	8.259034e-05	2.954474e-05
0.35303	7.703618e-05	2.953651e-05
0.353484	2.526193e-05	2.927208e-05
0.353938	1.032706e-04	2.946150e-05
0.354393	9.351099e-05	2.933277e-05
0.354847	1.139038e-04	2.931251e-05
0.355301	8.470036e-05	2.932479e-05
0.355756	1.032578e-05	2.916854e-05
0.35621	8.963173e-05	2.932664e-05
0.356664	5.491477e-05	2.920038e-05
0.357119	1.260082e-04	2.919978e-05
0.357573	5.963509e-05	2.908741e-05
0.358027	6.268904e-05	2.881081e-05
0.358482	1.066909e-04	2.905113e-05
0.358936	6.390508e-05	2.869584e-05
0.35939	-2.910283e-05	2.909144e-05
0.359845	1.010002e-04	2.878805e-05
0.360299	8.774047e-05	2.905639e-05
0.360753	1.438417e-04	2.896347e-05
0.361207	1.041271e-05	2.878342e-05
0.361662	1.183941e-04	2.902727e-05
0.362116	1.335117e-04	2.890071e-05
0.36257	5.895582e-05	2.891879e-05
0.363025	1.903796e-05	2.889816e-05
0.363479	6.802633e-05	2.887041e-05
0.363933	5.996429e-05	2.907830e-05
0.364387	8.062546e-05	2.876191e-05
0.364842	1.054235e-04	2.896367e-05
0.365296	1.884953e-04	2.886474e-05
0.36575	1.100223e-04	2.879105e-05
0.366204	3.649512e-05	2.896442e-05
0.366659	1.094113e-04	2.862825e-05
0.367113	7.990346e-05	2.892780e-05
0.367567	7.384644e-05	2.861658e-05
0.368021	1.229839e-04	2.888522e-05
0.368476	8.299861e-05	2.872469e-05
0.36893	6.997612e-05	2.860765e-05
0.369384	1.232114e-04	2.868765e-05
0.369838	2.701118e-06	2.852191e-05
0.370292	6.387728e-05	2.860880e-05
0.370747	8.235774e-05	2.848457e-05
0.371201	4.226065e-05	2.845745e-05
0.371655	8.041608e-05	2.866999e-05
0.372109	1.112891e-04	2.831765e-05
0.372563	9.780602e-05	2.870432e-05
0.373017	1.040780e-04	2.845590e-05
0.373472	7.462535e-05	2.856159e-05
0.373926	8.226971e-05	2.861845e-05
0.37438	1.100259e-04	2.849343e-05
0.374834	4.510480e-05	2.868443e-05
0.375288	5.121470e-05	2.829841e-05
0.375742	3.989291e-05	2.871331e-05
0.376197	7.206149e-05	2.857724e-05
0.376651	3.169716e-06	2.850639e-05
0.377105	1.215688e-04	2.874218e-05
0.377559	7.329300e-05	2.838758e-05
0.378013	8.613000e-05	2.874963e-05
0.378467	1.107190e-04	2.876259e-05
0.378921	4.462891e-05	2.857411e-05
0.379375	9.093891e-05	2.883037e-05
0.37983	2.469640e-05	2.841867e-05
0.380284	5.163462e-05	2.883503e-05
0.380738	1.058625e-04	2.862955e-05
0.381192	9.392598e-05	2.879931e-05
0.381646	4.918965e-05	2.869795e-05
0.3821	8.757215e-05	2.869169e-05
0.382554	9.147231e-05	2.889001e-05
0.383008	1.029029e-04	2.862117e-05
0.383462	-1.568739e-05	2.882628e-05
0.383916	1.018755e-04	2.881169e-05
0.38437	1.098477e-04	2.877029e-05
0.384824	4.277126e-05	2.892308e-05
0.385278	7.682121e-05	2.860474e-05
0.385732	4.397938e-05	2.888186e-05
0.386186	5.902697e-05	2.878774e-05
0.38664	5.216992e-05	2.895492e-05
0.387094	9.440287e-05	2.893571e-05
0.387548	8.130491e-05	2.879335e-05
0.388003	5.789322e-05	2.891959e-05
0.388457	8.593807e-05	2.874269e-05
0.388911	8.051566e-05	2.895590e-05
0.389365	5.653821e-05	2.893350e-05
0.389819	1.361654e-04	2.892778e-05
0.390273	1.871259e-05	2.900898e-05
0.390726	4.829673e-05	2.870472e-05
0.39118	5.653457e-05	2.908387e-05
0.391634	5.198324e-05	2.882345e-05
0.392088	-1.115597e-06	2.896913e-05
0.392542	4.823511e-05	2.914425e-05
0.392996	9.652574e-06	2.877700e-05
0.39345	7.177238e-05	2.896234e-05
0.393904	1.034925e-04	2.908243e-05
0.394358	3.064770e-05	2.894811e-05
0.394812	4.665966e-06	2.907179e-05
0.395266	1.312275e-04	2.893548e-05
0.39572	6.397300e-05	2.917323e-05
0.396174	5.108694e-05	2.895005e-05
0.396628	1.046169e-04	2.914902e-05
0.397082	7.418758e-05	2.904596e-05
0.397536	8.297396e-05	2.904934e-05
0.39799	7.661684e-05	2.922017e-05
0.398443	6.993528e-05	2.906673e-05
0.398897	8.623033e-05	2.919831e-05
0.399351	1.206021e-05	2.893046e-05
0.399805	6.727017e-05	2.918480e-05
0.400259	1.415359e-04	2.914320e-05
0.400713	3.379227e-05	2.914056e-05
0.401167	7.824799e-05	2.932766e-05
0.401621	1.054662e-04	2.905608e-05
0.402075	1.164732e-04	2.939964e-05
0.402528	1.370540e-04	2.913743e-05
0.402982	-5.797256e-07	2.899800e-05
0.403436	8.122507e-05	2.930136e-05
0.40389	5.163268e-05	2.900230e-05
0.404344	1.489342e-04	2.953914e-05
0.404798	9.725980e-05	2.905662e-05
0.405251	2.910646e-05	2.921778e-05
0.405705	6.963793e-05	2.945577e-05
0.406159	5.533243e-05	2.901356e-05
0.406613	3.799504e-05	2.944731e-05
0.407067	7.074575e-05	2.906789e-05
0.40752	3.795755e-05	2.917500e-05
0.407974	1.054212e-04	2.931150e-05
0.408428	9.414712e-05	2.907544e-05
0.408882	6.687680e-05	2.918268e-05
0.409336	8.175777e-05	2.903126e-05
0.409789	1.782975e-05	2.915883e-05
0.410243	3.479313e-05	2.909970e-05
0.410697	9.903253e-05	2.903529e-05
0.411151	5.327001e-05	2.917991e-05
0.411604	6.620993e-05	2.886879e-05
0.412058	7.484928e-05	2.919843e-05
0.412512	3.942372e-05	2.895198e-05
0.412966	6.601669e-05	2.909690e-05
0.413419	1.154744e-04	2.920872e-05
0.413873	8.489755e-05	2.905828e-05
0.414327	7.485702e-05	2.914844e-05
0.414781	6.404044e-05	2.896178e-05
0.415234	1.000980e-04	2.920508e-05
0.415688	8.213107e-05	2.913905e-05
0.416142	9.955700e-06	2.921195e-05
0.416595	2.536937e-05	2.913941e-05
0.417049	1.127208e-05	2.896315e-05
0.417503	9.756210e-05	2.927837e-05
0.417956	5.860062e-05	2.907390e-05
0.41841	1.399626e-04	2.917581e-05
0.418864	1.109962e-05	2.921305e-05
0.419317	2.320454e-05	2.908366e-05
0.419771	9.222952e-05	2.942539e-05
0.420225	1.093889e-04	2.899599e-05
0.420678	1.148278e-04	2.937024e-05
0.421132	1.015070e-04	2.914181e-05
0.421586	5.798122e-05	2.929446e-05
0.422039	3.583540e-05	2.927698e-05
0.422493	9.962970e-05	2.899481e-05
0.422947	5.570862e-05	2.938155e-05
0.4234	1.043308e-04	2.927031e-05
0.423854	-1.974589e-05	2.931605e-05
0.424307	2.373672e-05	2.935184e-05
0.424761	5.879285e-05	2.906033e-05
0.425215	1.509060e-05	2.941757e-05
0.425668	6.103272e-05	2.915965e-05
0.426122	7.063750e-05	2.926589e-05
0.426575	3.005646e-05	2.930646e-05
0.427029	1.892469e-05	2.929285e-05
0.427483	9.178796e-05	2.954000e-05
0.427936	7.717199e-05	2.912776e-05
0.42839	6.026093e-05	2.939094e-05
0.428843	1.091048e-04	2.936231e-05
0.429297	7.052650e-05	2.935091e-05
0.42975	4.862837e-05	2.951812e-05
0.430204	4.164817e-05	2.920735e-05
0.430657	-1.747203e-05	2.938449e-05
0.431111	2.062268e-05	2.928215e-05
0.431564	3.974903e-05	2.948162e-05
0.432018	1.328608e-06	2.940445e-05
0.432471	7.605581e-05	2.932417e-05
0.432925	7.115890e-05	2.967841e-05
0.433378	8.690378e-05	2.923681e-05
0.433832	7.509571e-06	2.940569e-05
0.434285	1.256610e-04	2.944983e-05
0.434739	3.029753e-05	2.946040e-05
0.435192	4.170461e-05	2.967253e-05
0.435646	8.459837e-05	2.915649e-05
0.436099	9.329474e-05	2.953911e-05
0.436553	7.508292e-05	2.938536e-05
0.437006	3.762307e-05	2.950350e-05
0.43746	9.660620e-06	2.961779e-05
0.437913	7.911897e-05	2.928805e-05
0.438367	-1.972888e-05	2.962131e-05
0.43882	4.614079e-05	2.948916e-05
0.439273	8.124958e-05	2.945850e-05
0.439727	2.262580e-06	2.953559e-05
0.44018	1.927891e-05	2.945587e-05
0.440634	5.753383e-05	2.968576e-05
0.441087	9.989439e-05	2.957445e-05
0.441541	7.709548e-05	2.947512e-05
0.441994	2.838394e-05	2.942731e-05
0.442447	3.289573e-05	2.963343e-05
0.442901	5.788639e-05	2.977877e-05
0.443354	8.784578e-05	2.939184e-05
0.443807	5.976186e-05	2.961674e-05
0.444261	3.303220e-05	2.955395e-05
0.444714	6.646824e-05	2.968010e-05
0.445168	1.194027e-04	2.950545e-05
0.445621	6.437736e-05	2.970523e-05
0.446074	9.472574e-06	2.966910e-05
0.446528	6.138115e-05	2.948726e-05
0.446981	1.314652e-04	2.979695e-05
0.447434	6.776625e-05	2.948670e-05
0.447888	4.496810e-05	2.967752e-05
0.448341	4.256191e-05	2.977502e-05
0.448794	4.784749e-05	2.952152e-05
0.449247	5.148686e-05	2.981500e-05
0.449701	9.054971e-05	2.955425e-05
0.450154	7.354665e-05	2.976578e-05
0.450607	1.284504e-04	2.979755e-05
0.451061	2.558739e-05	2.942277e-05
0.451514	3.798376e-05	2.996281e-05
0.451967	5.002648e-05	2.946419e-05
0.45242	4.607451e-05	2.999078e-05
0.452874	6.846600e-05	2.953020e-05
0.453327	1.309315e-04	2.973872e-05
0.45378	6.877838e-05	3.005319e-05
0.454233	-1.053432e-05	2.946167e-05
0.454687	4.268808e-05	2.988062e-05
0.45514	7.472603e-05	2.966080e-05
0.455593	4.586277e-05	2.977672e-05
0.456046	5.618455e-05	3.002474e-05
0.4565	1.815816e-05	2.948316e-05
0.456953	6.852226e-05	2.992122e-05
0.457406	7.909063e-05	2.980911e-05
0.457859	6.133549e-05	2.986486e-05
0.458312	1.496491e-04	3.002794e-05
0.458766	3.957225e-05	2.955277e-05
0.459219	5.286871e-05	2.995280e-05
0.459672	9.474298e-05	2.975848e-05
0.460125	1.298204e-04	3.001506e-05
0.460578	8.644152e-05	2.988339e-05
0.461031	6.309122e-05	2.984376e-05
0.461485	4.974759e-05	3.003647e-05
0.461938	7.227662e-05	2.968723e-05
0.462391	1.170737e-05	2.991882e-05
0.462844	7.909923e-05	2.979668e-05
0.463297	4.319336e-05	2.985655e-05
0.46375	7.539105e-05	3.004779e-05
0.464203	7.421052e-05	2.986892e-05
0.464657	7.918046e-05	3.003533e-05
0.46511	2.118995e-05	2.981702e-05
0.465563	1.655759e-05	3.008356e-05
0.466016	1.285507e-04	3.003662e-05
0.466469	-2.875483e-05	3.057961e-05
0.466922	2.925840e-05	3.166733e-05
0.467375	7.372280e-05	3.193855e-05
0.467828	6.508385e-05	3.270723e-05
0.468281	7.108073e-05	3.275531e-05
0.468734	1.165554e-04	3.338622e-05
0.469187	6.938892e-05	3.407724e-05
0.46964	5.588443e-05	3.384447e-05
0.470093	6.481394e-05	3.450082e-05
0.470546	8.474950e-05	3.457808e-05
0.470999	4.202109e-05	3.519206e-05
0.471452	1.012350e-04	3.563686e-05
0.471905	-1.896904e-05	3.558330e-05
0.472359	8.068436e-05	3.623256e-05
0.472812	5.460873e-05	3.614366e-05
0.473265	7.096479e-05	3.677896e-05
0.473718	3.476315e-05	3.689823e-05
0.47417	-2.130995e-06	3.708471e-05
0.474623	3.784933e-05	3.799840e-05
0.475076	8.520427e-05	3.772742e-05
0.475529	3.220705e-05	3.835901e-05
0.475982	6.505731e-05	3.800943e-05
0.476435	1.605503e-04	3.897318e-05
0.476888	1.751523e-05	3.918862e-05
0.477341	-9.082871e-07	3.953017e-05
0.477794	6.651621e-05	3.984848e-05
0.478247	1.019484e-04	3.940034e-05
0.4787	-5.271293e-05	4.060171e-05
0.479153	3.965553e-05	4.016571e-05
0.479606	5.180775e-06	4.107006e-05
0.480059	7.246523e-05	4.093106e-05
0.480512	6.466226e-05	4.126056e-05
0.480965	1.141139e-04	4.199633e-05
0.481417	8.526103e-05	4.197833e-05
0.48187	8.175533e-05	4.214625e-05
0.482323	5.108155e-05	4.272789e-05
0.482776	1.007798e-04	4.325734e-05
0.483229	1.388390e-04	4.359532e-05
0.483682	1.362205e-05	4.306504e-05
0.484135	9.404854e-06	4.342816e-05
0.484588	8.830188e-05	4.414485e-05
0.48504	6.954829e-05	4.388589e-05
0.485493	-1.222059e-05	4.379987e-05
0.485946	7.416069e-05	4.405031e-05
0.486399	-8.927205e-06	4.401773e-05
0.486852	7.088160e-05	4.439424e-05
0.487305	8.447209e-05	4.391042e-05
0.487757	8.716744e-05	4.431799e-05
0.48821	2.149267e-04	4.468595e-05
0.488663	5.132610e-05	4.480727e-05
0.489116	4.263064e-05	4.451166e-05
0.489569	7.411971e-05	4.434840e-05
0.490021	1.349679e-04	4.495986e-05
0.490474	1.416810e-04	4.483958e-05
0.490927	6.755335e-05	4.549810e-05
0.49138	1.367300e-05	4.481025e-05
0.491832	8.268991e-05	4.550122e-05
0.492285	5.065154e-05	4.559839e-05
0.492738	-5.566183e-05	4.578395e-05
0.493191	1.024035e-04	4.558604e-05
0.493643	-3.378573e-05	4.595950e-05
0.494096	-1.688681e-08	4.637412e-05
0.494549	1.511596e-04	4.667576e-05
0.495001	4.772534e-06	4.635654e-05
0.495454	5.563460e-05	4.658089e-05
0.495907	1.052447e-04	4.691267e-05
0.49636	5.316398e-05	4.750846e-05
0.496812	1.625516e-04	4.722149e-05
0.497265	-1.654988e-05	4.723068e-05
0.497718	1.727893e-05	4.745914e-05
0.49817	7.936827e-05	4.812025e-05
0.498623	5.237599e-05	4.865523e-05
0.499076	-7.172626e-05	4.751189e-05
0.499528	-1.215584e-05	4.821976e-05
0.499981	1.035717e-04	4.862668e-05
0.500433	6.466923e-05	4.912618e-05

## Sheet: RRM1-2 + (GU)12
#US-SOMO: SAXS HPLC data: RRM1-2 + (GU)12
#q	I(q)	sd		Figure 5-figure supplement 8a
0.0060813237544	1.075560e+00	2.490573e-02
0.00658810030501	1.085296e+00	1.786991e-02
0.00709487675269	1.067039e+00	1.424079e-02
0.00760165308951	1.079631e+00	1.262839e-02
0.00810842930755	1.066943e+00	1.192765e-02
0.0086152053989	1.056701e+00	1.043349e-02
0.00912198135563	1.056271e+00	9.881882e-03
0.00962875716983	1.057347e+00	9.360059e-03
0.0101355328336	1.034301e+00	8.640587e-03
0.010642308339	1.069176e+00	8.451491e-03
0.0111490836781	1.035083e+00	7.694417e-03
0.011655858843	1.050052e+00	7.739519e-03
0.0121626338257	1.046864e+00	7.325107e-03
0.0126694086185	1.030390e+00	6.872277e-03
0.0131761832132	1.042036e+00	6.796335e-03
0.0136829576021	1.027917e+00	6.458099e-03
0.0141897317772	1.032582e+00	6.604154e-03
0.0146965057306	1.016363e+00	6.133664e-03
0.0152032794543	1.019477e+00	6.016502e-03
0.0157100529405	1.022624e+00	5.910226e-03
0.0162168261812	1.016225e+00	5.721320e-03
0.0167235991686	1.014979e+00	5.706631e-03
0.0172303718946	9.892859e-01	5.385025e-03
0.0177371443514	1.008492e+00	5.367660e-03
0.0182439165311	9.979894e-01	5.345227e-03
0.0187506884257	9.814435e-01	5.124579e-03
0.0192574600273	9.777262e-01	5.128380e-03
0.0197642313281	9.683529e-01	4.882810e-03
0.02027100232	9.684892e-01	4.971424e-03
0.0207777729952	9.687134e-01	4.795895e-03
0.0212845433457	9.627165e-01	4.726521e-03
0.0217913133637	9.487588e-01	4.655270e-03
0.0222980830412	9.399355e-01	4.526295e-03
0.0228048523703	9.382006e-01	4.616431e-03
0.0233116213431	9.265472e-01	4.398296e-03
0.0238183899516	9.260480e-01	4.414339e-03
0.024325158188	9.216560e-01	4.326632e-03
0.0248319260443	9.050306e-01	4.217845e-03
0.0253386935126	9.049864e-01	4.211439e-03
0.025845460585	8.926012e-01	4.101126e-03
0.0263522272536	8.793972e-01	4.106252e-03
0.0268589935104	8.825701e-01	4.035566e-03
0.0273657593476	8.734574e-01	4.166077e-03
0.0278725247572	8.649056e-01	4.138299e-03
0.0283792897313	8.558616e-01	4.066013e-03
0.028886054262	8.491721e-01	4.176872e-03
0.0293928183413	8.389638e-01	4.008301e-03
0.0298995819614	8.304063e-01	4.131020e-03
0.0304063451144	8.228691e-01	4.035539e-03
0.0309131077922	8.216913e-01	4.001028e-03
0.0314198699871	8.226995e-01	4.103121e-03
0.031926631691	8.047888e-01	3.898403e-03
0.0324333928961	8.039379e-01	4.059203e-03
0.0329401535945	7.879361e-01	3.910419e-03
0.0334469137782	7.869573e-01	3.908255e-03
0.0339536734393	7.756175e-01	3.906566e-03
0.0344604325699	7.611098e-01	3.806610e-03
0.0349671911621	7.644528e-01	3.908646e-03
0.0354739492079	7.511442e-01	3.796621e-03
0.0359807066995	7.332102e-01	3.803264e-03
0.0364874636289	7.372325e-01	3.800100e-03
0.0369942199883	7.301378e-01	3.667565e-03
0.0375009757696	7.218843e-01	3.790293e-03
0.038007730965	7.107018e-01	3.623816e-03
0.0385144855666	7.074447e-01	3.691839e-03
0.0390212395665	6.959750e-01	3.653610e-03
0.0395279929566	6.848842e-01	3.595378e-03
0.0400347457292	6.781330e-01	3.652800e-03
0.0405414978763	6.769861e-01	3.551167e-03
0.04104824939	6.580564e-01	3.546016e-03
0.0415550002623	6.531954e-01	3.529463e-03
0.0420617504854	6.443759e-01	3.523682e-03
0.0425685000513	6.425834e-01	3.477752e-03
0.0430752489521	6.326463e-01	3.447921e-03
0.04358199718	6.214067e-01	3.421710e-03
0.0440887447269	6.098906e-01	3.437725e-03
0.044595491585	6.054489e-01	3.381377e-03
0.0451022377464	5.972982e-01	3.366361e-03
0.0456089832031	5.882995e-01	3.325241e-03
0.0461157279472	5.836121e-01	3.333462e-03
0.0466224719708	5.720483e-01	3.292975e-03
0.047129215266	5.692170e-01	3.305016e-03
0.0476359578249	5.613775e-01	3.270603e-03
0.0481426996396	5.589713e-01	3.243533e-03
0.0486494407021	5.476948e-01	3.233075e-03
0.0491561810045	5.329100e-01	3.166121e-03
0.049662920539	5.331760e-01	3.214911e-03
0.0501696592975	5.240289e-01	3.123155e-03
0.0506763972723	5.204223e-01	3.174534e-03
0.0511831344553	5.094787e-01	3.128432e-03
0.0516898708387	5.060440e-01	3.100894e-03
0.0521966064145	4.932541e-01	3.094282e-03
0.0527033411748	4.896831e-01	3.066501e-03
0.0532100751118	4.793944e-01	3.085330e-03
0.0537168082174	4.740539e-01	3.019658e-03
0.0542235404839	4.677774e-01	2.987203e-03
0.0547302719032	4.620710e-01	3.028994e-03
0.0552370024675	4.551737e-01	2.963926e-03
0.0557437321688	4.424560e-01	2.985585e-03
0.0562504609992	4.425297e-01	2.936889e-03
0.0567571889508	4.342508e-01	2.934644e-03
0.0572639160158	4.309760e-01	2.932596e-03
0.0577706421861	4.179730e-01	2.869458e-03
0.0582773674539	4.108501e-01	2.892075e-03
0.0587840918112	4.085303e-01	2.845121e-03
0.0592908152502	3.978322e-01	2.863914e-03
0.0597975377629	3.964286e-01	2.833397e-03
0.0603042593415	3.941084e-01	2.818952e-03
0.0608109799779	3.810827e-01	2.802989e-03
0.0613176996643	3.798215e-01	2.796008e-03
0.0618244183928	3.737309e-01	2.767830e-03
0.0623311361555	3.655136e-01	2.758491e-03
0.0628378529444	3.608058e-01	2.738712e-03
0.0633445687516	3.561475e-01	2.728111e-03
0.0638512835693	3.516854e-01	2.716512e-03
0.0643579973895	3.450653e-01	2.723348e-03
0.0648647102043	3.393948e-01	2.655519e-03
0.0653714220057	3.395804e-01	2.710704e-03
0.065878132786	3.310118e-01	2.665393e-03
0.0663848425371	3.272398e-01	2.641796e-03
0.0668915512511	3.192241e-01	2.643801e-03
0.0673982589202	3.134463e-01	2.597070e-03
0.0679049655364	3.112134e-01	2.631704e-03
0.0684116710918	3.052505e-01	2.594454e-03
0.0689183755785	3.022057e-01	2.593324e-03
0.0694250789886	3.013904e-01	2.582772e-03
0.0699317813141	2.921594e-01	2.561526e-03
0.0704384825473	2.858311e-01	2.551133e-03
0.07094518268	2.832740e-01	2.536339e-03
0.0714518817046	2.812941e-01	2.518633e-03
0.0719585796129	2.730374e-01	2.542925e-03
0.0724652763972	2.748311e-01	2.498361e-03
0.0729719720494	2.677631e-01	2.512183e-03
0.0734786665618	2.630340e-01	2.465048e-03
0.0739853599263	2.656790e-01	2.470875e-03
0.0744920521352	2.581059e-01	2.475857e-03
0.0749987431803	2.469092e-01	2.433403e-03
0.075505433054	2.468106e-01	2.439661e-03
0.0760121217481	2.432234e-01	2.424363e-03
0.0765188092549	2.373580e-01	2.453275e-03
0.0770254955664	2.325180e-01	2.385820e-03
0.0775321806748	2.362345e-01	2.416525e-03
0.078038864572	2.276686e-01	2.388626e-03
0.0785455472502	2.266899e-01	2.385606e-03
0.0790522287015	2.190060e-01	2.425100e-03
0.079558908918	2.171254e-01	2.416173e-03
0.0800655878917	2.134890e-01	2.482380e-03
0.0805722656147	2.093723e-01	2.495588e-03
0.0810789420793	2.100379e-01	2.483707e-03
0.0815856172773	2.096317e-01	2.508577e-03
0.0820922912009	1.999064e-01	2.440750e-03
0.0825989638423	1.988610e-01	2.493451e-03
0.0831056351935	2.007691e-01	2.481752e-03
0.0836123052465	1.922239e-01	2.472084e-03
0.0841189739936	1.962971e-01	2.477054e-03
0.0846256414267	1.900567e-01	2.442747e-03
0.085132307538	1.856702e-01	2.496714e-03
0.0856389723196	1.871627e-01	2.454936e-03
0.0861456357635	1.826025e-01	2.469155e-03
0.0866522978618	1.801466e-01	2.449145e-03
0.0871589586067	1.693428e-01	2.437935e-03
0.0876656179902	1.765017e-01	2.468058e-03
0.0881722760044	1.732456e-01	2.421443e-03
0.0886789326414	1.713920e-01	2.448466e-03
0.0891855878934	1.686703e-01	2.449588e-03
0.0896922417523	1.626367e-01	2.436878e-03
0.0901988942103	1.613873e-01	2.442168e-03
0.0907055452595	1.587396e-01	2.392786e-03
0.091212194892	1.548803e-01	2.421802e-03
0.0917188430998	1.556892e-01	2.412189e-03
0.0922254898751	1.504521e-01	2.409215e-03
0.09273213521	1.519113e-01	2.400123e-03
0.0932387790965	1.502845e-01	2.399831e-03
0.0937454215267	1.496634e-01	2.412427e-03
0.0942520624928	1.462786e-01	2.372682e-03
0.0947587019867	1.362736e-01	2.374762e-03
0.0952653400008	1.368225e-01	2.386419e-03
0.0957719765269	1.355887e-01	2.366318e-03
0.0962786115572	1.392942e-01	2.396341e-03
0.0967852450839	1.331163e-01	2.358198e-03
0.0972918770989	1.314400e-01	2.367060e-03
0.0977985075944	1.324011e-01	2.371930e-03
0.0983051365625	1.263192e-01	2.359776e-03
0.0988117639953	1.295787e-01	2.354707e-03
0.0993183898849	1.282063e-01	2.318731e-03
0.0998250142234	1.224873e-01	2.357671e-03
0.100331637003	1.259337e-01	2.331249e-03
0.100838258215	1.238690e-01	2.351291e-03
0.101344877853	1.221637e-01	2.332935e-03
0.101851495908	1.200922e-01	2.315944e-03
0.102358112372	1.194568e-01	2.364820e-03
0.102864727238	1.157470e-01	2.299854e-03
0.103371340497	1.110164e-01	2.406850e-03
0.103877952142	1.136275e-01	2.426889e-03
0.104384562164	1.157095e-01	2.483112e-03
0.104891170557	1.123370e-01	2.507193e-03
0.105397777311	1.081910e-01	2.503586e-03
0.105904382419	1.093287e-01	2.539768e-03
0.106410985874	1.084562e-01	2.547594e-03
0.106917587667	1.080349e-01	2.582486e-03
0.10742418779	1.032140e-01	2.594082e-03
0.107930786235	1.045749e-01	2.589132e-03
0.108437382995	1.021039e-01	2.638730e-03
0.108943978062	9.952611e-02	2.601240e-03
0.109450571427	9.674268e-02	2.671941e-03
0.109957163083	9.842121e-02	2.634448e-03
0.110463753022	9.269458e-02	2.663539e-03
0.110970341236	9.960522e-02	2.722694e-03
0.111476927717	9.352143e-02	2.665496e-03
0.111983512457	9.067828e-02	2.722341e-03
0.112490095449	9.142909e-02	2.707447e-03
0.112996676684	9.276604e-02	2.623138e-03
0.113503256154	9.111623e-02	2.558200e-03
0.114009833852	8.948538e-02	2.540070e-03
0.11451640977	8.865302e-02	2.506895e-03
0.115022983899	8.764841e-02	2.471096e-03
0.115529556233	8.654373e-02	2.460210e-03
0.116036126762	8.445948e-02	2.449929e-03
0.11654269548	7.554193e-02	2.431250e-03
0.117049262377	8.089206e-02	2.445941e-03
0.117555827447	7.795551e-02	2.394224e-03
0.118062390682	7.952675e-02	2.413014e-03
0.118568952073	7.759020e-02	2.377882e-03
0.119075511612	7.550294e-02	2.388983e-03
0.119582069292	7.173625e-02	2.361659e-03
0.120088625105	7.624326e-02	2.373190e-03
0.120595179043	7.349875e-02	2.372136e-03
0.121101731098	7.265397e-02	2.326917e-03
0.121608281262	7.332957e-02	2.351553e-03
0.122114829527	7.116477e-02	2.333054e-03
0.122621375886	7.004897e-02	2.318893e-03
0.123127920329	7.489896e-02	2.339006e-03
0.123634462851	6.828338e-02	2.295394e-03
0.124141003442	6.989002e-02	2.315112e-03
0.124647542094	6.326297e-02	2.277807e-03
0.125154078801	6.696503e-02	2.291466e-03
0.125660613553	6.405664e-02	2.293871e-03
0.126167146344	6.426937e-02	2.288174e-03
0.126673677165	6.251846e-02	2.287429e-03
0.127180206007	6.434315e-02	2.251105e-03
0.127686732865	6.390046e-02	2.271089e-03
0.128193257728	5.945683e-02	2.260411e-03
0.12869978059	5.852451e-02	2.249749e-03
0.129206301443	5.918365e-02	2.243898e-03
0.129712820279	5.693797e-02	2.230645e-03
0.130219337089	5.352129e-02	2.238057e-03
0.130725851866	5.559970e-02	2.219454e-03
0.131232364603	5.668526e-02	2.216094e-03
0.13173887529	5.451769e-02	2.203954e-03
0.132245383921	5.371639e-02	2.183720e-03
0.132751890488	5.517300e-02	2.197671e-03
0.133258394981	5.366801e-02	2.169328e-03
0.133764897395	5.025281e-02	2.178099e-03
0.13427139772	4.819396e-02	2.162631e-03
0.134777895949	5.273188e-02	2.154652e-03
0.135284392073	5.185082e-02	2.163417e-03
0.135790886086	5.268080e-02	2.111656e-03
0.136297377979	5.089372e-02	2.140900e-03
0.136803867744	5.004828e-02	2.130620e-03
0.137310355374	4.517395e-02	2.111062e-03
0.13781684086	4.691918e-02	2.120830e-03
0.138323324194	4.604600e-02	2.087868e-03
0.13882980537	4.461915e-02	2.130760e-03
0.139336284377	4.177144e-02	2.083813e-03
0.13984276121	4.558671e-02	2.104807e-03
0.14034923586	4.582390e-02	2.088960e-03
0.140855708319	4.769737e-02	2.093638e-03
0.141362178579	4.006890e-02	2.093642e-03
0.141868646633	4.638226e-02	2.083096e-03
0.142375112471	3.656761e-02	2.072383e-03
0.142881576088	4.115363e-02	2.083374e-03
0.143388037474	3.955575e-02	2.080997e-03
0.143894496622	3.888142e-02	2.077430e-03
0.144400953523	4.092643e-02	2.047641e-03
0.144907408171	3.885608e-02	2.060628e-03
0.145413860557	3.759551e-02	2.069793e-03
0.145920310673	3.736183e-02	2.059022e-03
0.146426758511	3.483544e-02	2.045205e-03
0.146933204064	3.185922e-02	2.048665e-03
0.147439647323	3.390876e-02	2.050680e-03
0.147946088281	3.643369e-02	2.050587e-03
0.148452526929	3.517143e-02	2.032434e-03
0.148958963261	3.380350e-02	2.032017e-03
0.149465397267	3.230103e-02	2.038325e-03
0.149971828941	3.222101e-02	2.034992e-03
0.150478258273	3.310595e-02	2.037124e-03
0.150984685257	3.395100e-02	2.020791e-03
0.151491109885	3.506483e-02	2.029087e-03
0.151997532148	2.819548e-02	2.024404e-03
0.152503952038	3.338567e-02	2.016204e-03
0.153010369549	3.053367e-02	2.010266e-03
0.153516784671	3.211533e-02	2.015146e-03
0.154023197397	2.955472e-02	2.015080e-03
0.15452960772	3.292209e-02	2.008835e-03
0.15503601563	3.252207e-02	2.000531e-03
0.155542421121	2.973496e-02	1.994583e-03
0.156048824185	2.681542e-02	2.008024e-03
0.156555224813	2.940629e-02	1.987688e-03
0.157061622997	2.535509e-02	1.989498e-03
0.157568018731	2.761506e-02	1.993571e-03
0.158074412005	2.845562e-02	1.986235e-03
0.158580802812	2.687721e-02	1.990619e-03
0.159087191145	2.738325e-02	1.975065e-03
0.159593576995	2.452446e-02	1.975586e-03
0.160099960354	2.804668e-02	1.977595e-03
0.160606341215	3.338869e-02	1.984576e-03
0.161112719569	2.555155e-02	1.972261e-03
0.161619095409	2.432464e-02	1.957537e-03
0.162125468727	2.337166e-02	1.979466e-03
0.162631839515	2.543874e-02	1.967121e-03
0.163138207764	2.106888e-02	1.962873e-03
0.163644573469	2.619512e-02	1.949545e-03
0.164150936619	2.432560e-02	1.959372e-03
0.164657297208	2.572814e-02	1.968033e-03
0.165163655227	2.473861e-02	1.931380e-03
0.165670010669	1.550088e-02	1.936205e-03
0.166176363526	1.856550e-02	1.930929e-03
0.16668271379	2.160094e-02	1.958540e-03
0.167189061453	1.945070e-02	1.946407e-03
0.167695406507	2.039612e-02	1.930127e-03
0.168201748944	2.223756e-02	1.936493e-03
0.168708088757	2.360486e-02	1.931378e-03
0.169214425937	1.939028e-02	1.939529e-03
0.169720760477	2.189428e-02	1.926482e-03
0.170227092369	2.385819e-02	1.926774e-03
0.170733421604	1.970997e-02	1.930242e-03
0.171239748176	1.914880e-02	1.920605e-03
0.171746072075	1.656791e-02	1.918353e-03
0.172252393295	2.613741e-02	1.909782e-03
0.172758711827	2.236098e-02	1.924255e-03
0.173265027664	2.243262e-02	1.927814e-03
0.173771340797	2.003963e-02	1.897502e-03
0.174277651219	2.116619e-02	1.910465e-03
0.174783958922	1.923525e-02	1.893756e-03
0.175290263898	1.225113e-02	1.907870e-03
0.175796566139	1.526755e-02	1.891660e-03
0.176302865637	1.533322e-02	1.900048e-03
0.176809162385	1.802066e-02	1.902943e-03
0.177315456374	1.611346e-02	1.884658e-03
0.177821747597	1.955994e-02	1.899676e-03
0.178328036045	1.696883e-02	1.890080e-03
0.178834321711	1.568279e-02	1.874411e-03
0.179340604587	1.476156e-02	1.893458e-03
0.179846884666	1.802866e-02	1.877159e-03
0.180353161938	1.349814e-02	1.891225e-03
0.180859436397	1.279854e-02	1.865768e-03
0.181365708035	1.811128e-02	1.880512e-03
0.181871976843	1.561546e-02	1.890584e-03
0.182378242814	1.837435e-02	1.915470e-03
0.182884505939	1.407886e-02	1.972356e-03
0.183390766212	1.862715e-02	1.972530e-03
0.183897023624	1.473040e-02	2.025101e-03
0.184403278167	1.156384e-02	2.012435e-03
0.184909529833	1.255687e-02	1.954063e-03
0.185415778615	1.002410e-02	1.928718e-03
0.185922024505	1.792365e-02	1.903866e-03
0.186428267494	1.555872e-02	1.892802e-03
0.186934507575	1.392334e-02	1.889952e-03
0.18744074474	1.436992e-02	1.879600e-03
0.187946978982	1.514647e-02	1.888332e-03
0.188453210291	1.511172e-02	1.871553e-03
0.188959438661	1.349907e-02	1.879148e-03
0.189465664084	1.103095e-02	1.852140e-03
0.189971886551	1.145159e-02	1.869982e-03
0.190478106055	1.298955e-02	1.860405e-03
0.190984322588	1.075005e-02	1.854441e-03
0.191490536143	1.189985e-02	1.862348e-03
0.19199674671	1.145763e-02	1.846027e-03
0.192502954283	1.387141e-02	1.859104e-03
0.193009158853	1.367887e-02	1.847135e-03
0.193515360412	1.380189e-02	1.845679e-03
0.194021558954	1.289045e-02	1.844344e-03
0.194527754469	1.321007e-02	1.839393e-03
0.195033946951	7.778963e-03	1.838291e-03
0.19554013639	1.282773e-02	1.833316e-03
0.19604632278	9.883253e-03	1.830107e-03
0.196552506112	1.015646e-02	1.836010e-03
0.197058686379	1.120591e-02	1.825919e-03
0.197564863572	1.139760e-02	1.831329e-03
0.198071037684	1.028921e-02	1.812667e-03
0.198577208707	1.181838e-02	1.834316e-03
0.199083376633	1.298598e-02	1.824226e-03
0.199589541455	1.188209e-02	1.810263e-03
0.200095703163	1.065370e-02	1.825220e-03
0.200601861752	8.748033e-03	1.799882e-03
0.201108017212	9.175108e-03	1.828191e-03
0.201614169535	9.437147e-03	1.796753e-03
0.202120318715	1.020810e-02	1.807978e-03
0.202626464742	9.296647e-03	1.807874e-03
0.20313260761	9.557617e-03	1.798186e-03
0.20363874731	1.169202e-02	1.804985e-03
0.204144883835	8.445879e-03	1.788034e-03
0.204651017176	1.020730e-02	1.808812e-03
0.205157147326	1.140171e-02	1.794298e-03
0.205663274276	9.554950e-03	1.786076e-03
0.20616939802	1.276898e-02	1.804255e-03
0.206675518549	7.410069e-03	1.764341e-03
0.207181635855	6.706603e-03	1.799049e-03
0.207687749931	9.614970e-03	1.785138e-03
0.208193860768	9.004179e-03	1.777144e-03
0.208699968359	6.103476e-03	1.786404e-03
0.209206072695	1.341929e-02	1.770752e-03
0.20971217377	5.997301e-03	1.782582e-03
0.210218271575	1.094808e-02	1.752335e-03
0.210724366102	5.677856e-03	1.769554e-03
0.211230457344	6.268435e-03	1.758791e-03
0.211736545292	7.353888e-03	1.753579e-03
0.212242629939	8.868619e-03	1.768462e-03
0.212748711276	7.682036e-03	1.750360e-03
0.213254789297	9.617906e-03	1.752887e-03
0.213760863993	8.775956e-03	1.755558e-03
0.214266935356	7.706791e-03	1.745102e-03
0.214773003379	6.296350e-03	1.765728e-03
0.215279068053	8.993668e-03	1.737149e-03
0.215785129371	9.690518e-03	1.753259e-03
0.216291187324	9.575356e-03	1.754436e-03
0.216797241906	5.510423e-03	1.745668e-03
0.217303293108	8.065366e-03	1.759208e-03
0.217809340922	6.059006e-03	1.746123e-03
0.218315385341	3.412785e-03	1.746984e-03
0.218821426356	4.416176e-03	1.735485e-03
0.21932746396	6.596199e-03	1.739224e-03
0.219833498145	7.538188e-03	1.742119e-03
0.220339528903	5.944440e-03	1.743003e-03
0.220845556226	7.557131e-03	1.744273e-03
0.221351580106	8.892864e-03	1.727335e-03
0.221857600536	3.556151e-03	1.737203e-03
0.222363617508	6.266858e-03	1.724682e-03
0.222869631013	7.380806e-03	1.732092e-03
0.223375641045	7.380899e-03	1.737291e-03
0.223881647594	3.757188e-03	1.718448e-03
0.224387650654	8.576101e-03	1.736525e-03
0.224893650216	8.441312e-03	1.719149e-03
0.225399646272	6.210213e-03	1.723918e-03
0.225905638815	5.623583e-03	1.722180e-03
0.226411627838	6.242657e-03	1.718215e-03
0.226917613331	4.226748e-03	1.721783e-03
0.227423595287	5.690603e-03	1.708694e-03
0.227929573698	3.504998e-03	1.710864e-03
0.228435548557	5.125147e-03	1.713691e-03
0.228941519856	3.484912e-03	1.708064e-03
0.229447487586	3.393614e-03	1.715735e-03
0.229953451741	4.915474e-03	1.697482e-03
0.230459412311	4.860187e-03	1.713771e-03
0.23096536929	7.446788e-03	1.706131e-03
0.231471322669	5.863961e-03	1.694051e-03
0.23197727244	3.352508e-03	1.700787e-03
0.232483218596	5.030524e-03	1.693309e-03
0.232989161129	5.481088e-03	1.712207e-03
0.233495100031	5.354312e-03	1.694195e-03
0.234001035294	4.175919e-03	1.695313e-03
0.234506966911	7.188692e-03	1.692653e-03
0.235012894873	4.482094e-03	1.690776e-03
0.235518819172	8.324227e-03	1.704090e-03
0.236024739802	6.115876e-03	1.685452e-03
0.236530656753	4.413128e-03	1.688999e-03
0.237036570019	5.684320e-03	1.683484e-03
0.23754247959	3.844851e-03	1.683684e-03
0.23804838546	7.469265e-03	1.689561e-03
0.238554287621	1.663689e-03	1.671899e-03
0.239060186065	5.751987e-03	1.689144e-03
0.239566080783	2.996452e-03	1.673369e-03
0.240071971768	5.903936e-03	1.674827e-03
0.240577859013	4.432746e-03	1.674891e-03
0.241083742509	6.590820e-03	1.677367e-03
0.241589622248	7.886045e-03	1.690982e-03
0.242095498224	1.250715e-03	1.666274e-03
0.242601370427	4.236005e-03	1.671436e-03
0.24310723885	2.628325e-03	1.719867e-03
0.243613103485	4.012509e-03	1.748421e-03
0.244118964325	2.432255e-03	1.778511e-03
0.244624821361	5.412898e-03	1.771571e-03
0.245130674586	2.915255e-03	1.811917e-03
0.245636523992	5.115620e-03	1.805894e-03
0.246142369571	2.010692e-03	1.834827e-03
0.246648211315	2.633148e-03	1.828288e-03
0.247154049216	2.870073e-03	1.840829e-03
0.247659883267	1.494008e-03	1.866109e-03
0.248165713459	5.455792e-03	1.865218e-03
0.248671539786	4.956862e-03	1.880822e-03
0.249177362238	4.345156e-03	1.891911e-03
0.249683180808	6.754916e-03	1.902453e-03
0.250188995489	-3.392013e-04	1.911766e-03
0.250694806273	6.103751e-03	1.913910e-03
0.251200613151	3.657053e-03	1.929109e-03
0.251706416116	4.867049e-03	1.925921e-03
0.25221221516	1.024406e-03	1.950377e-03
0.252718010275	5.082345e-03	1.867585e-03
0.253223801453	2.428866e-03	1.835312e-03
0.253729588687	3.797285e-03	1.834263e-03
0.254235371969	2.836570e-03	1.812427e-03
0.25474115129	4.586396e-03	1.810054e-03
0.255246926644	3.064065e-03	1.785125e-03
0.255752698022	4.836468e-03	1.772670e-03
0.256258465416	5.395756e-03	1.772301e-03
0.256764228818	4.119337e-03	1.754731e-03
0.257269988222	2.565202e-03	1.754066e-03
0.257775743618	3.489119e-03	1.734398e-03
0.258281495	1.943299e-03	1.716851e-03
0.258787242358	6.355380e-03	1.737403e-03
0.259292985686	6.022439e-03	1.707750e-03
0.259798724976	5.281917e-03	1.718137e-03
0.260304460219	3.463567e-03	1.692829e-03
0.260810191409	3.102165e-03	1.700335e-03
0.261315918536	2.138981e-03	1.691381e-03
0.261821641594	6.277984e-03	1.676104e-03
0.262327360574	4.548373e-03	1.682033e-03
0.262833075469	1.696541e-03	1.664929e-03
0.26333878627	2.100567e-03	1.673831e-03
0.263844492971	1.589674e-03	1.654418e-03
0.264350195563	3.096489e-03	1.645644e-03
0.264855894038	1.457865e-03	1.658921e-03
0.265361588389	-1.263854e-03	1.643276e-03
0.265867278607	3.097214e-03	1.649607e-03
0.266372964685	4.678998e-03	1.645800e-03
0.266878646616	1.534612e-03	1.648609e-03
0.26738432439	1.714697e-03	1.643508e-03
0.267889998001	1.874611e-03	1.635127e-03
0.268395667441	4.337586e-03	1.639567e-03
0.268901332701	3.699638e-03	1.631706e-03
0.269406993774	3.890295e-03	1.640146e-03
0.269912650653	6.283732e-03	1.638167e-03
0.270418303329	2.029563e-04	1.632188e-03
0.270923951794	3.236267e-03	1.630274e-03
0.271429596041	2.283525e-03	1.618881e-03
0.271935236062	4.959149e-03	1.631977e-03
0.272440871849	4.252490e-03	1.626057e-03
0.272946503394	4.326315e-03	1.623731e-03
0.27345213069	4.790355e-03	1.625027e-03
0.273957753728	4.818227e-03	1.617222e-03
0.274463372501	3.778722e-03	1.624135e-03
0.274968987001	2.917355e-03	1.617595e-03
0.27547459722	2.960857e-03	1.614593e-03
0.275980203151	2.158509e-03	1.612139e-03
0.276485804785	4.928305e-03	1.614234e-03
0.276991402114	2.250301e-03	1.615015e-03
0.277496995132	1.776355e-03	1.599387e-03
0.27800258383	2.468215e-03	1.605333e-03
0.2785081682	5.335835e-03	1.608207e-03
0.279013748234	6.105496e-03	1.611944e-03
0.279519323926	4.413498e-03	1.610528e-03
0.280024895266	7.369786e-03	1.589189e-03
0.280530462247	2.638596e-03	1.610074e-03
0.281036024861	5.914355e-03	1.590694e-03
0.281541583101	3.128358e-03	1.603768e-03
0.282047136958	1.865613e-03	1.596632e-03
0.282552686425	3.930996e-03	1.590616e-03
0.283058231494	3.810728e-03	1.601347e-03
0.283563772158	3.299179e-04	1.576088e-03
0.284069308407	4.390436e-05	1.592620e-03
0.284574840236	4.679787e-03	1.590931e-03
0.285080367635	3.189557e-03	1.585498e-03
0.285585890597	3.002670e-03	1.592917e-03
0.286091409114	3.496471e-03	1.574533e-03
0.286596923178	1.974978e-03	1.589930e-03
0.287102432782	3.797524e-03	1.575059e-03
0.287607937918	3.915928e-03	1.581448e-03
0.288113438578	5.647775e-04	1.578710e-03
0.288618934753	6.298905e-03	1.573833e-03
0.289124426438	1.917975e-03	1.580068e-03
0.289629913622	5.488550e-03	1.568265e-03
0.2901353963	1.218242e-03	1.574903e-03
0.290640874462	1.845658e-03	1.575241e-03
0.291146348101	3.478464e-03	1.574397e-03
0.29165181721	1.611167e-03	1.576700e-03
0.29215728178	5.150079e-03	1.558744e-03
0.292662741804	4.247396e-03	1.568922e-03
0.293168197274	1.468444e-03	1.562883e-03
0.293673648182	2.203274e-03	1.563133e-03
0.29417909452	3.189782e-03	1.574689e-03
0.29468453628	2.119531e-03	1.549466e-03
0.295189973456	5.792732e-03	1.571342e-03
0.295695406038	1.192798e-03	1.552216e-03
0.296200834019	2.896597e-04	1.556603e-03
0.296706257392	4.007396e-03	1.558393e-03
0.297211676148	2.475404e-03	1.553643e-03
0.29771709028	4.046053e-03	1.563116e-03
0.29822249978	3.207278e-03	1.550019e-03
0.29872790464	4.116860e-03	1.553660e-03
0.299233304852	2.723132e-03	1.550214e-03
0.299738700409	3.687662e-03	1.552806e-03
0.300244091303	2.734493e-03	1.555235e-03
0.300749477525	6.131223e-04	1.538799e-03
0.301254859069	2.560107e-03	1.547944e-03
0.301760235926	5.720205e-04	1.540055e-03
0.302265608088	2.194805e-03	1.542467e-03
0.302770975549	4.379697e-03	1.548518e-03
0.303276338299	3.103092e-03	1.535535e-03
0.303781696331	4.842376e-03	1.548545e-03
0.304287049638	2.000185e-03	1.529446e-03
0.304792398212	3.875758e-03	1.536799e-03
0.305297742044	4.322043e-03	1.529452e-03
0.305803081127	5.370506e-03	1.529467e-03
0.306308415454	2.730908e-03	1.541124e-03
0.306813745016	4.970498e-03	1.522770e-03
0.307319069805	3.417716e-03	1.531198e-03
0.307824389815	4.180528e-03	1.524472e-03
0.308329705036	4.180156e-03	1.534190e-03
0.308835015462	5.389320e-03	1.523264e-03
0.309340321084	-8.646678e-04	1.509877e-03
0.309845621895	5.381106e-04	1.528051e-03
0.310350917887	3.844325e-03	1.522330e-03
0.310856209052	2.476261e-03	1.520864e-03
0.311361495383	4.812563e-03	1.525441e-03
0.311866776871	5.682928e-03	1.518264e-03
0.312372053508	3.664145e-03	1.525554e-03
0.312877325288	3.528814e-03	1.510224e-03
0.313382592202	2.359654e-03	1.525457e-03
0.313887854243	3.248948e-03	1.511752e-03
0.314393111402	2.514566e-03	1.519276e-03
0.314898363672	6.861104e-03	1.523847e-03
0.315403611044	3.899079e-03	1.508395e-03
0.315908853513	4.417508e-03	1.521388e-03
0.316414091069	1.163627e-03	1.511899e-03
0.316919323704	2.931449e-03	1.509805e-03
0.317424551412	1.990588e-03	1.512670e-03
0.317929774183	1.051011e-03	1.501741e-03
0.318434992011	3.304449e-03	1.509837e-03
0.318940204888	2.917354e-03	1.508352e-03
0.319445412806	2.403153e-03	1.504165e-03
0.319950615756	4.532640e-03	1.503083e-03
0.320455813732	3.253165e-03	1.506256e-03
0.320961006725	3.450031e-03	1.507380e-03
0.321466194728	4.705714e-03	1.495450e-03
0.321971377733	3.244890e-03	1.501332e-03
0.322476555733	2.432939e-03	1.496434e-03
0.322981728718	3.969554e-03	1.503356e-03
0.323486896682	3.372367e-03	1.502128e-03
0.323992059618	3.967911e-03	1.493034e-03
0.324497217516	4.655502e-03	1.492401e-03
0.325002370369	5.551876e-03	1.492516e-03
0.32550751817	1.291002e-03	1.497798e-03
0.326012660911	4.507676e-03	1.491796e-03
0.326517798584	3.971213e-03	1.492895e-03
0.327022931181	5.247730e-03	1.492015e-03
0.327528058694	8.156188e-04	1.485107e-03
0.328033181116	2.905197e-03	1.492635e-03
0.328538298439	3.035993e-03	1.481617e-03
0.329043410655	3.832768e-03	1.483449e-03
0.329548517756	2.797497e-03	1.491567e-03
0.330053619735	2.465524e-03	1.473457e-03
0.330558716584	4.568016e-03	1.487616e-03
0.331063808295	4.629209e-03	1.471732e-03
0.33156889486	3.680960e-03	1.488141e-03
0.332073976272	1.020677e-03	1.481112e-03
0.332579052522	3.068632e-04	1.474769e-03
0.333084123604	1.337772e-03	1.479928e-03
0.333589189508	2.851119e-03	1.470289e-03
0.334094250228	3.680511e-03	1.478999e-03
0.334599305756	2.461354e-03	1.473133e-03
0.335104356084	3.679990e-03	1.471648e-03
0.335609401204	3.147366e-03	1.481691e-03
0.336114441108	6.995755e-05	1.463294e-03
0.336619475789	4.501723e-03	1.473387e-03
0.337124505238	7.906359e-04	1.460040e-03
0.337629529449	3.626300e-03	1.466942e-03
0.338134548413	4.077419e-03	1.476873e-03
0.338639562123	5.550663e-03	1.463126e-03
0.339144570571	2.589576e-04	1.467568e-03
0.339649573748	1.176572e-03	1.459757e-03
0.340154571648	5.597625e-03	1.467456e-03
0.340659564263	2.837747e-03	1.465273e-03
0.341164551584	1.922074e-03	1.462304e-03
0.341669533604	4.777362e-03	1.461220e-03
0.342174510315	4.115350e-03	1.458733e-03
0.34267948171	2.860901e-03	1.461013e-03
0.343184447781	3.740932e-03	1.455984e-03
0.34368940852	2.368870e-03	1.452742e-03
0.344194363919	3.751457e-03	1.458135e-03
0.34469931397	1.394546e-03	1.455924e-03
0.345204258666	3.672100e-03	1.453383e-03
0.345709198	6.185591e-03	1.452439e-03
0.346214131962	1.396953e-03	1.452041e-03
0.346719060546	4.543243e-03	1.453814e-03
0.347223983743	2.325442e-05	1.448806e-03
0.347728901547	2.355962e-03	1.448239e-03
0.348233813948	5.127079e-03	1.453906e-03
0.34873872094	2.891047e-03	1.444055e-03
0.349243622515	1.566633e-03	1.447472e-03
0.349748518665	5.611816e-03	1.442900e-03
0.350253409382	2.398387e-03	1.441041e-03
0.350758294658	5.869800e-03	1.446543e-03
0.351263174486	4.384459e-03	1.444422e-03
0.351768048858	3.793871e-03	1.447133e-03
0.352272917766	3.467752e-03	1.435041e-03
0.352777781203	5.589073e-03	1.445084e-03
0.35328263916	4.064670e-03	1.443708e-03
0.353787491631	3.679020e-03	1.432327e-03
0.354292338606	3.636204e-03	1.436533e-03
0.354797180079	1.673109e-03	1.437508e-03
0.355302016042	2.631699e-03	1.436598e-03
0.355806846487	6.142812e-03	1.435936e-03
0.356311671405	5.171562e-03	1.435865e-03
0.356816490791	3.923407e-03	1.432467e-03
0.357321304635	1.457331e-03	1.437285e-03
0.35782611293	2.701569e-03	1.425115e-03
0.358330915668	3.873253e-03	1.433026e-03
0.358835712842	3.891293e-03	1.430151e-03
0.359340504444	3.855195e-03	1.426463e-03
0.359845290465	1.653062e-03	1.431132e-03
0.360350070899	2.288983e-03	1.423239e-03
0.360854845738	4.112248e-03	1.428339e-03
0.361359614973	1.718053e-03	1.423984e-03
0.361864378597	4.110337e-03	1.425284e-03
0.362369136603	2.737459e-03	1.429479e-03
0.362873888982	4.316745e-03	1.413501e-03
0.363378635727	4.421880e-03	1.429894e-03
0.363883376831	2.049392e-03	1.419263e-03
0.364388112284	4.255536e-03	1.423462e-03
0.36489284208	5.634178e-04	1.422760e-03
0.365397566212	3.961748e-03	1.409875e-03
0.36590228467	2.747694e-03	1.426415e-03
0.366406997448	4.244666e-03	1.409319e-03
0.366911704537	4.441430e-03	1.417323e-03
0.36741640593	-5.842602e-04	1.414546e-03
0.36792110162	3.255655e-03	1.410642e-03
0.368425791598	2.269330e-03	1.420297e-03
0.368930475857	5.747178e-04	1.406454e-03
0.369435154389	3.181472e-03	1.415113e-03
0.369939827186	5.046504e-03	1.409956e-03
0.370444494241	2.732891e-03	1.408917e-03
0.370949155545	5.295567e-03	1.418972e-03
0.371453811092	4.975902e-03	1.403666e-03
0.371958460873	2.654520e-03	1.410201e-03
0.372463104881	3.413271e-03	1.411360e-03
0.372967743108	2.971967e-03	1.405937e-03
0.373472375546	1.547269e-03	1.408656e-03
0.373977002187	1.665731e-03	1.396888e-03
0.374481623024	3.604731e-03	1.405649e-03
0.374986238049	3.613353e-03	1.403657e-03
0.375490847255	4.565255e-03	1.402091e-03
0.375995450633	2.562739e-03	1.400563e-03
0.376500048176	5.723667e-03	1.407199e-03
0.377004639876	3.607070e-03	1.403197e-03
0.377509225725	1.816568e-03	1.396678e-03
0.378013805716	1.165823e-03	1.398217e-03
0.378518379841	3.449161e-03	1.394841e-03
0.379022948092	1.957458e-03	1.398004e-03
0.379527510462	2.410345e-03	1.398653e-03
0.380032066942	1.704975e-03	1.391117e-03
0.380536617526	3.291357e-03	1.399256e-03
0.381041162205	4.420293e-03	1.397530e-03
0.381545700971	2.642343e-03	1.398474e-03
0.382050233818	2.056155e-03	1.435006e-03
0.382554760736	2.771451e-03	1.451933e-03
0.383059281719	2.198044e-03	1.473609e-03
0.383563796759	1.549880e-03	1.467326e-03
0.384068305848	5.078402e-03	1.496655e-03
0.384572808978	1.912211e-03	1.497450e-03
0.385077306142	1.917652e-03	1.511234e-03
0.385581797332	3.272241e-03	1.524300e-03
0.38608628254	1.317430e-03	1.515976e-03
0.386590761758	2.357251e-03	1.529255e-03
0.387095234979	5.751367e-03	1.538207e-03
0.387599702195	2.229381e-03	1.553706e-03
0.388104163398	1.368662e-03	1.561884e-03
0.388608618582	2.799579e-03	1.548678e-03
0.389113067736	3.592860e-03	1.581262e-03
0.389617510856	4.719331e-03	1.570126e-03
0.390121947931	1.302592e-03	1.577198e-03
0.390626378955	1.334066e-03	1.571868e-03
0.391130803921	-6.252268e-04	1.581560e-03
0.39163522282	8.568553e-04	1.530799e-03
0.392139635644	2.609307e-03	1.501450e-03
0.392644042386	3.865497e-03	1.502801e-03
0.393148443039	2.187582e-03	1.477107e-03
0.393652837594	2.846017e-03	1.479795e-03
0.394157226044	3.401963e-03	1.470361e-03
0.394661608381	-9.688179e-05	1.453966e-03
0.395165984597	4.189008e-03	1.450161e-03
0.395670354685	4.016670e-03	1.438792e-03
0.396174718637	2.463847e-03	1.439767e-03
0.396679076446	2.235922e-03	1.435995e-03
0.397183428102	3.050717e-03	1.423355e-03
0.3976877736	-1.009163e-03	1.426911e-03
0.398192112931	1.823380e-03	1.412476e-03
0.398696446088	2.974756e-03	1.413673e-03
0.399200773062	2.827635e-03	1.404646e-03
0.399705093846	3.937174e-03	1.409782e-03
0.400209408433	6.557911e-03	1.417549e-03
0.400713716814	3.312187e-03	1.396194e-03
0.401218018983	3.348401e-03	1.407955e-03
0.40172231493	-7.432984e-05	1.395458e-03
0.40222660465	4.664163e-03	1.402479e-03
0.402730888133	3.676635e-03	1.401700e-03
0.403235165372	2.646438e-03	1.394428e-03
0.40373943636	2.637263e-03	1.400546e-03
0.404243701089	2.799783e-03	1.389211e-03
0.40474795955	4.467731e-03	1.398649e-03
0.405252211737	1.644053e-03	1.394023e-03
0.405756457642	1.502642e-03	1.386823e-03
0.406260697257	1.359288e-03	1.398982e-03
0.406764930574	1.410344e-03	1.386542e-03
0.407269157586	3.499698e-03	1.386034e-03
0.407773378285	3.449081e-03	1.383680e-03
0.408277592663	1.573310e-03	1.384786e-03
0.408781800713	4.376074e-03	1.396256e-03
0.409286002426	2.169022e-03	1.380574e-03
0.409790197796	1.627309e-03	1.382427e-03
0.410294386814	5.917615e-03	1.378819e-03
0.410798569473	2.493769e-03	1.383243e-03
0.411302745766	1.993543e-03	1.378169e-03
0.411806915683	5.435682e-03	1.380122e-03
0.412311079219	3.796322e-03	1.380893e-03
0.412815236364	2.912477e-03	1.376523e-03
0.413319387112	1.224342e-03	1.380486e-03
0.413823531454	2.487186e-03	1.372230e-03
0.414327669384	8.425200e-04	1.369274e-03
0.414831800893	2.427113e-03	1.380652e-03
0.415335925973	4.526338e-03	1.364718e-03
0.415840044618	2.440888e-03	1.378151e-03
0.416344156818	4.997004e-03	1.368720e-03
0.416848262568	4.378680e-03	1.369000e-03
0.417352361858	2.647374e-03	1.370700e-03
0.417856454682	3.664408e-03	1.365728e-03
0.418360541031	2.523176e-03	1.373295e-03
0.418864620898	1.855329e-03	1.362591e-03
0.419368694275	2.747725e-03	1.368788e-03
0.419872761155	3.107156e-03	1.363408e-03
0.420376821529	1.920768e-03	1.362845e-03
0.420880875391	3.992345e-03	1.367304e-03
0.421384922732	3.461867e-03	1.361311e-03
0.421888963545	3.323307e-03	1.363766e-03
0.422392997823	3.056539e-03	1.362340e-03
0.422897025556	3.263941e-03	1.356388e-03
0.423401046739	4.399742e-03	1.361282e-03
0.423905061362	2.232881e-03	1.351906e-03
0.424409069419	5.124973e-03	1.360429e-03
0.424913070902	2.820307e-03	1.350196e-03
0.425417065803	3.862653e-03	1.356168e-03
0.425921054115	2.518215e-03	1.354440e-03
0.426425035829	2.498439e-03	1.353701e-03
0.426929010938	2.380442e-03	1.351399e-03
0.427432979435	2.791421e-03	1.344182e-03
0.427936941311	1.989440e-03	1.350495e-03
0.42844089656	2.103467e-03	1.347837e-03
0.428944845173	2.115791e-03	1.349958e-03
0.429448787143	2.114394e-03	1.343312e-03
0.429952722462	6.200353e-03	1.342303e-03
0.430456651122	1.660201e-03	1.352663e-03
0.430960573116	1.452092e-03	1.344266e-03
0.431464488436	2.461557e-03	1.342138e-03
0.431968397075	4.810493e-03	1.346331e-03
0.432472299024	6.810507e-03	1.348940e-03
0.432976194277	2.616268e-03	1.350353e-03
0.433480082824	4.633228e-03	1.334737e-03
0.43398396466	9.059369e-04	1.346949e-03
0.434487839776	2.779631e-03	1.343331e-03
0.434991708164	1.547368e-03	1.344248e-03
0.435495569817	1.464609e-03	1.343826e-03
0.435999424728	2.773344e-03	1.332113e-03
0.436503272887	2.821781e-03	1.345537e-03
0.437007114289	1.416223e-03	1.336125e-03
0.437510948925	1.658890e-03	1.340221e-03
0.438014776787	1.901814e-03	1.342744e-03
0.438518597868	2.284397e-03	1.332675e-03
0.439022412161	3.839736e-03	1.339537e-03
0.439526219657	3.158166e-03	1.333897e-03
0.440030020348	-1.679268e-03	1.331605e-03
0.440533814228	4.109600e-03	1.336690e-03
0.441037601289	4.203741e-03	1.333145e-03
0.441541381523	1.756971e-03	1.336316e-03
0.442045154921	1.412846e-03	1.326458e-03
0.442548921478	1.038888e-03	1.331939e-03
0.443052681184	3.474810e-03	1.334469e-03
0.443556434033	2.078979e-03	1.330963e-03
0.444060180017	1.277549e-03	1.331124e-03
0.444563919127	1.765735e-03	1.342368e-03
0.445067651357	1.284109e-03	1.380269e-03
0.445571376699	2.051642e-03	1.374175e-03
0.446075095145	2.428353e-03	1.388563e-03
0.446578806687	5.349093e-03	1.387153e-03
0.447082511318	2.306973e-03	1.400687e-03
0.44758620903	3.942592e-03	1.403037e-03
0.448089899816	4.912891e-03	1.400464e-03
0.448593583667	3.328452e-03	1.406707e-03
0.449097260577	4.068313e-03	1.407167e-03
0.449600930537	1.999570e-03	1.411830e-03
0.450104593541	1.340348e-03	1.422440e-03
0.450608249579	2.246195e-03	1.408892e-03
0.451111898645	3.641819e-03	1.427691e-03
0.451615540732	2.687465e-04	1.412553e-03
0.45211917583	9.347515e-04	1.428207e-03
0.452622803934	3.600556e-03	1.430634e-03
0.453126425034	1.882618e-03	1.431056e-03
0.453630039124	3.231205e-03	1.441527e-03
0.454133646196	3.150972e-03	1.425223e-03
0.454637246242	2.891650e-03	1.439594e-03
0.455140839254	3.482616e-03	1.436713e-03
0.455644425226	1.801497e-03	1.442672e-03
0.456148004149	4.828158e-03	1.448069e-03
0.456651576015	3.404500e-03	1.436785e-03
0.457155140817	3.383309e-03	1.439805e-03
0.457658698548	2.219061e-03	1.442740e-03
0.458162249199	3.289185e-03	1.436413e-03
0.458665792764	1.679596e-03	1.445084e-03
0.459169329234	2.825998e-03	1.434731e-03
0.459672858602	2.137568e-03	1.448791e-03
0.46017638086	2.964003e-03	1.438447e-03
0.460679896001	4.105732e-03	1.449378e-03
0.461183404017	9.520138e-04	1.440263e-03
0.4616869049	3.912874e-03	1.448736e-03
0.462190398643	7.667338e-04	1.457385e-03
0.462693885238	3.786559e-03	1.443805e-03
0.463197364677	3.810637e-03	1.456562e-03
0.463700836953	2.801532e-03	1.450810e-03
0.464204302059	6.226653e-04	1.452714e-03
0.464707759986	2.531570e-03	1.454254e-03
0.465211210726	3.695614e-03	1.453029e-03
0.465714654274	3.647009e-03	1.465563e-03
0.46621809062	8.116751e-04	1.448646e-03
0.466721519757	1.710322e-03	1.467655e-03
0.467224941677	2.308137e-03	1.460642e-03
0.467728356374	1.430657e-03	1.457735e-03
0.468231763839	3.048234e-03	1.472868e-03
0.468735164064	5.176050e-03	1.461669e-03
0.469238557042	2.952997e-03	1.472365e-03
0.469741942766	4.304098e-03	1.460962e-03
0.470245321227	5.715414e-03	1.471748e-03
0.470748692419	2.540691e-03	1.481037e-03
0.471252056333	2.223076e-03	1.459980e-03
0.471755412962	4.810555e-03	1.478794e-03
0.472258762298	3.102386e-03	1.465409e-03
0.472762104334	4.145366e-03	1.480523e-03
0.473265439063	2.741225e-03	1.476176e-03
0.473768766475	1.747272e-03	1.470436e-03
0.474272086565	-9.555446e-04	1.479852e-03
0.474775399323	3.555043e-03	1.479294e-03
0.475278704744	6.179228e-03	1.483621e-03
0.475782002818	2.104709e-03	1.484685e-03
0.476285293539	2.213273e-03	1.472338e-03
0.476788576898	1.710884e-03	1.486196e-03
0.477291852889	3.221401e-03	1.478226e-03
0.477795121503	1.489985e-03	1.488295e-03
0.478298382733	4.091519e-03	1.483645e-03
0.478801636572	3.990391e-03	1.488907e-03
0.479304883011	1.539144e-03	1.494727e-03
0.479808122044	4.365012e-03	1.479640e-03
0.480311353662	1.845604e-03	1.485593e-03
0.480814577858	1.140589e-03	1.488657e-03
0.481317794625	4.641144e-03	1.498522e-03
0.481821003954	5.004043e-03	1.491901e-03
0.482324205838	3.688358e-03	1.487432e-03
0.48282740027	1.813364e-03	1.499581e-03
0.483330587242	2.208037e-03	1.487316e-03
0.483833766746	3.120570e-03	1.502694e-03
0.484336938775	2.724898e-03	1.490989e-03
0.484840103321	4.276971e-03	1.496921e-03
0.485343260377	2.031817e-03	1.510786e-03
0.485846409934	5.390511e-03	1.482920e-03
0.486349551986	3.339406e-03	1.513079e-03
0.486852686525	9.375092e-04	1.490868e-03
0.487355813543	5.056054e-03	1.510649e-03
0.487858933032	1.827627e-03	1.507611e-03
0.488362044986	1.134812e-03	1.488309e-03
0.488865149396	5.766763e-03	1.511794e-03
0.489368246254	3.632459e-03	1.497981e-03
0.489871335554	3.386403e-03	1.512766e-03
0.490374417287	2.572777e-03	1.506723e-03
0.490877491447	3.260821e-03	1.499941e-03
0.491380558025	4.177775e-03	1.519532e-03
0.491883617014	2.462481e-03	1.501546e-03
0.492386668406	3.329913e-03	1.511904e-03
0.492889712193	3.570387e-03	1.507605e-03
0.493392748369	3.181455e-03	1.506554e-03
0.493895776925	-1.151872e-03	1.523482e-03
0.494398797854	2.187066e-03	1.500846e-03
0.494901811149	4.527745e-03	1.521712e-03
0.495404816801	5.666930e-03	1.505781e-03
0.495907814803	5.595849e-03	1.518161e-03
0.496410805148	1.762164e-03	1.519342e-03
0.496913787828	-1.874791e-04	1.510211e-03
0.497416762836	1.678177e-03	1.522296e-03
0.497919730163	2.741800e-03	1.514283e-03
0.498422689802	6.469612e-03	1.524174e-03
0.498925641746	1.168029e-03	1.513798e-03
0.499428585987	2.357038e-03	1.523022e-03
0.499931522518	3.046278e-03	1.527184e-03
0.500434451331	4.126190e-03	1.517732e-03
