# Supplementary material for: The cooperative binding of TDP-43 to GU-rich RNA repeats antagonizes TDP-43 aggregation
Source: eLife. 2021 Sep 7;10:e67605. doi: 10.7554/eLife.67605 (PMC8523171; doi:10.7554/eLife.67605)
Supplement: Figure 5—figure supplement 1—source data 2. [file elife-67605-fig5-figsupp1-data2.xlsx]

## Sheet: RRM1-2
							Figure 5-Figure supplement 8b
frame	Rg	dRg	I(0)*100	dI*100	M	dM
125.00	13.937	4.3758	2.6305	0.45610	18.989	8.8830
126.00	8.1432	5.8775	2.9894	0.46324	33.766	26.523
127.00	14.960	3.3883	3.9483	0.46291	25.691	8.3757
128.00	15.679	1.3392	5.5214	0.25065	27.203	3.3910
129.00	17.573	1.4931	7.0079	0.31727	22.388	2.7799
130.00	21.757	1.8489	8.8088	0.41638	22.528	2.8637
131.00	19.737	1.3349	9.5187	0.35302	23.668	2.3758
132.00	18.886	1.0705	10.728	0.33733	21.585	1.8274
133.00	20.174	1.0886	12.903	0.39074	20.561	1.6679
134.00	21.799	1.0179	15.061	0.39835	20.777	1.4660
135.00	20.754	0.79099	16.871	0.36139	21.394	1.2268
136.00	21.368	0.81321	19.799	0.42324	22.728	1.3009
137.00	20.523	0.61270	21.446	0.36546	20.904	0.94713
138.00	20.887	0.78715	23.604	0.50313	21.300	1.2120
139.00	21.978	0.69048	26.707	0.47818	20.684	0.98533
140.00	20.992	0.57890	28.158	0.44275	19.423	0.81239
141.00	21.375	0.54362	31.326	0.44494	21.335	0.81347
142.00	20.886	0.47184	33.331	0.42520	21.034	0.71678
143.00	20.577	0.45254	35.015	0.43561	21.687	0.72018
144.00	21.423	0.40179	38.211	0.40727	21.407	0.60780
145.00	21.625	0.45166	40.574	0.48356	21.547	0.68288
146.00	20.966	0.34066	41.559	0.38517	20.645	0.50890
147.00	21.665	0.43681	44.501	0.51389	20.824	0.63843
148.00	22.067	0.36023	46.242	0.43444	21.345	0.53129
149.00	21.165	0.40638	47.525	0.52346	20.722	0.60555
150.00	22.097	0.34802	49.778	0.45222	21.073	0.50671
151.00	21.337	0.31482	50.214	0.42501	20.982	0.47116
152.00	21.028	0.32808	50.729	0.44947	20.863	0.49259
153.00	22.044	0.33800	52.987	0.46730	20.513	0.47940
154.00	21.698	0.32048	53.121	0.44996	21.228	0.47711
155.00	21.297	0.29354	53.227	0.41979	20.467	0.42873
156.00	21.444	0.34600	53.765	0.49485	20.538	0.50273
157.00	21.729	0.34382	54.149	0.49467	20.788	0.50244
158.00	21.832	0.33837	54.908	0.48748	21.166	0.49885
159.00	21.476	0.26827	53.406	0.38157	20.053	0.38059
160.00	21.524	0.27384	54.086	0.39526	21.207	0.41094
161.00	21.195	0.34321	53.568	0.49870	21.246	0.52426
162.00	21.573	0.30263	53.079	0.42371	20.343	0.43233
163.00	21.257	0.31683	52.553	0.44676	20.606	0.46591
164.00	21.236	0.33547	51.964	0.46744	21.109	0.50539
165.00	21.442	0.37458	51.031	0.50913	20.614	0.54669
166.00	21.240	0.34668	49.850	0.46290	20.769	0.51350
167.00	20.532	0.32456	48.122	0.43045	20.988	0.50105
168.00	22.053	0.34774	49.217	0.44660	20.578	0.49473
169.00	21.558	0.37599	48.054	0.47489	20.683	0.54520
170.00	20.836	0.39105	45.702	0.48562	20.067	0.56896
171.00	21.266	0.37990	45.004	0.45784	20.185	0.54653
172.00	20.412	0.33333	42.675	0.39452	20.755	0.51201
173.00	21.527	0.36034	42.992	0.41341	21.284	0.54267
174.00	20.937	0.41408	41.494	0.46704	20.569	0.61633
175.00	21.690	0.46284	40.895	0.49287	20.796	0.66949
176.00	21.012	0.40701	38.907	0.42582	20.426	0.59705
177.00	21.224	0.44791	38.212	0.45641	21.378	0.68145
178.00	20.687	0.38422	36.146	0.38361	20.382	0.57486
179.00	21.170	0.44860	35.924	0.43472	20.438	0.65743
180.00	20.988	0.44448	34.356	0.41530	19.976	0.64201
181.00	21.794	0.45557	34.061	0.40474	20.935	0.66259
182.00	21.999	0.58094	33.224	0.50208	21.429	0.86004
183.00	20.250	0.45461	30.826	0.39119	21.181	0.71772
184.00	23.388	0.58259	31.848	0.45621	21.163	0.80341
185.00	21.718	0.61763	29.808	0.48738	20.545	0.89037
186.00	21.290	0.55407	28.580	0.42303	21.724	0.85626
187.00	21.321	0.56015	27.454	0.41177	21.166	0.84403
188.00	22.026	0.61536	26.987	0.43089	21.466	0.91078
189.00	21.116	0.60280	25.404	0.40654	22.815	0.97846
190.00	22.136	0.70898	25.105	0.45661	20.000	0.96933
191.00	22.881	0.73793	24.368	0.45483	21.328	1.0521
192.00	22.273	0.72961	23.762	0.44797	21.004	1.0491
193.00	22.032	0.75718	22.804	0.44244	21.052	1.0912
194.00	22.040	0.75079	21.707	0.41787	20.553	1.0566
195.00	23.467	0.89985	21.681	0.48065	20.204	1.1844
196.00	21.913	0.81079	20.420	0.43365	22.305	1.2564
197.00	22.983	0.97672	20.238	0.48428	21.961	1.4056
198.00	23.208	1.0163	19.257	0.48133	20.695	1.3754
199.00	22.691	0.79731	18.299	0.37045	21.508	1.1530
200.00	21.579	0.82016	17.505	0.37645	21.506	1.2344
201.00	23.916	1.0855	17.769	0.46538	22.157	1.5357
202.00	21.940	0.99002	16.654	0.41977	20.624	1.3953
203.00	20.674	0.91408	15.620	0.38181	24.066	1.5863
204.00	22.584	0.97566	15.692	0.38758	21.280	1.3965
205.00	21.320	0.85308	14.964	0.34092	22.210	1.3468
206.00	31.892	2.2787	17.478	0.76960	21.253	2.4102
207.00	21.549	1.0095	13.867	0.37016	23.167	1.6455
208.00	21.614	1.0889	13.545	0.38576	22.169	1.6858
209.00	22.994	1.3790	13.591	0.46389	24.919	2.2644
210.00	26.880	1.6475	14.397	0.51962	22.878	2.1665
211.00	21.640	1.1685	12.289	0.36429	25.444	2.0404
212.00	27.542	2.0779	13.273	0.59358	24.629	2.8819
213.00	22.880	1.6204	11.986	0.47133	27.950	2.9582
214.00	29.569	2.8995	13.076	0.74187	20.099	3.0141
215.00	32.261	3.1510	13.068	0.75410	21.342	3.2266
216.00	25.734	1.8111	11.553	0.46745	22.915	2.4575
217.00	30.155	2.4443	12.051	0.58487	23.004	2.9091
218.00	24.947	2.2092	10.332	0.51894	22.068	2.9552
219.00	26.104	2.2113	10.557	0.52704	23.501	3.0771
220.00	29.104	2.5712	10.937	0.58423	25.494	3.5343
221.00	27.711	2.5361	9.8623	0.52008	20.921	2.9215
222.00	30.861	2.9702	10.802	0.62094	25.044	3.7548
223.00	27.053	2.8030	9.6724	0.58003	21.779	3.4519
224.00	25.306	2.2384	9.3053	0.47633	30.194	4.0851
225.00	29.420	2.7942	9.5924	0.55588	24.691	3.6999

## Sheet: RRM1-2;(GU)3
								Figure 5-Figure supplement 8b
frame	Rg	dRg	I0*4000	dI0*4000	M	dM
103.00	13.524	8.1331	2.8596	0.92284	62.153	54.831
104.00	10.427	9.4435	2.3886	0.76131	88.417	97.923
105.00	20.500	11.316	3.3994	0.92056	32.216	24.913
107.00	20.543	1.7916	4.5277	0.21848	25.633	3.3342
108.00	20.060	1.4279	5.3757	0.21654	27.156	2.9194
109.00	19.375	1.1892	6.3738	0.21665	24.579	2.2511
110.00	20.355	1.0473	7.8410	0.22446	23.485	1.8077
111.00	19.883	0.80020	8.9362	0.20463	21.851	1.3322
112.00	21.895	0.92617	10.847	0.26241	23.396	1.5036
113.00	21.346	0.74695	12.471	0.24811	22.411	1.1875
114.00	21.662	0.65303	14.319	0.24593	21.750	0.99404
115.00	21.064	0.61482	15.945	0.26317	21.351	0.94078
116.00	21.402	0.54730	18.816	0.27646	21.250	0.82780
117.00	21.131	0.45502	20.800	0.25394	22.445	0.73073
118.00	21.674	0.36573	23.080	0.21997	20.603	0.52451
119.00	21.659	0.38777	25.801	0.26404	22.138	0.60200
120.00	21.404	0.31290	27.964	0.23239	21.779	0.48208
121.00	21.184	0.30586	30.403	0.25023	21.733	0.47586
122.00	21.529	0.34084	33.212	0.30102	22.205	0.53442
123.00	21.542	0.28639	35.560	0.27151	22.184	0.44914
124.00	21.423	0.27428	37.799	0.27903	21.604	0.42218
125.00	21.950	0.28742	40.657	0.30488	21.746	0.43296
126.00	21.598	0.25443	42.379	0.28507	21.861	0.39093
127.00	21.805	0.23831	44.606	0.27969	21.708	0.36110
128.00	22.118	0.23789	46.887	0.28899	21.869	0.35777
129.00	21.911	0.23887	48.292	0.30433	21.775	0.36287
130.00	22.208	0.21998	50.082	0.28662	21.869	0.33102
131.00	22.073	0.22188	50.968	0.29665	21.375	0.32876
132.00	21.874	0.19268	52.271	0.26596	21.743	0.29263
133.00	21.970	0.19891	53.452	0.27832	21.849	0.30150
134.00	21.709	0.20207	53.649	0.28478	21.950	0.30991
135.00	21.745	0.19575	54.082	0.28178	21.979	0.30266
136.00	21.866	0.21350	54.846	0.30920	21.923	0.32698
137.00	21.680	0.21237	54.438	0.30752	21.861	0.32690
138.00	21.918	0.18621	54.973	0.27063	21.880	0.28454
139.00	21.805	0.21204	54.114	0.30265	21.361	0.31661
140.00	21.993	0.21759	54.398	0.31014	21.889	0.33045
141.00	21.718	0.18481	53.418	0.26243	21.785	0.28316
142.00	21.843	0.22647	53.133	0.31750	21.984	0.34783
143.00	22.079	0.21129	52.578	0.28801	21.748	0.31636
144.00	22.113	0.22725	51.735	0.30488	21.515	0.33643
145.00	21.722	0.20801	50.196	0.27760	21.412	0.31327
146.00	21.796	0.21354	49.213	0.27663	21.812	0.32526
147.00	21.382	0.20147	47.649	0.25866	21.634	0.31099
148.00	21.920	0.23572	46.879	0.29205	21.513	0.35407
149.00	21.869	0.24420	45.771	0.29454	21.254	0.36215
150.00	21.906	0.21378	44.326	0.25026	21.754	0.32467
151.00	21.765	0.24743	43.098	0.28020	22.132	0.38226
152.00	22.264	0.22550	41.910	0.24277	20.989	0.32298
153.00	21.236	0.23029	40.196	0.25079	21.638	0.35772
154.00	21.808	0.24587	39.173	0.25322	21.283	0.36509
155.00	21.646	0.27548	37.640	0.27421	21.188	0.40989
156.00	22.159	0.25701	36.728	0.24472	21.799	0.38512
157.00	22.182	0.29235	35.428	0.26860	21.228	0.42648
158.00	22.260	0.29880	34.251	0.26646	21.476	0.44130
159.00	21.806	0.31881	32.534	0.27170	21.269	0.47211
160.00	22.021	0.31608	31.445	0.25936	21.342	0.46668
161.00	22.141	0.29671	30.208	0.23215	20.970	0.42761
162.00	21.236	0.35625	28.321	0.27265	21.292	0.54374
163.00	21.567	0.35508	27.787	0.26303	20.860	0.52336
164.00	21.204	0.32267	26.137	0.22738	20.789	0.48053
165.00	22.287	0.41684	25.707	0.27485	20.792	0.59068
166.00	21.915	0.43649	24.366	0.27975	20.872	0.63446
167.00	21.758	0.37527	23.344	0.23202	20.416	0.53729
168.00	21.250	0.42130	22.074	0.24826	21.255	0.63731
169.00	21.562	0.41903	21.307	0.23828	21.063	0.62409
170.00	21.363	0.48626	20.022	0.26052	21.242	0.73441
171.00	21.905	0.45870	19.932	0.23976	21.156	0.67478
172.00	22.268	0.52123	19.337	0.26177	22.199	0.79449
173.00	21.715	0.52719	18.036	0.25082	20.904	0.77174
174.00	22.072	0.58565	17.421	0.26582	21.321	0.86220
175.00	21.430	0.58679	16.263	0.25562	21.029	0.87668
176.00	21.951	0.61348	15.761	0.25077	21.177	0.89690
177.00	22.375	0.67576	15.120	0.25861	19.539	0.89162
178.00	22.035	0.68179	14.591	0.25793	21.231	0.99747
179.00	22.209	0.80206	14.379	0.29787	20.599	1.1322
180.00	22.544	0.80930	13.761	0.28373	20.836	1.1392
181.00	21.940	0.70247	13.218	0.24055	22.237	1.0780
182.00	21.304	0.71217	12.380	0.23704	21.012	1.0681
183.00	21.728	0.88546	11.967	0.28047	21.898	1.3601
184.00	21.860	0.84871	11.725	0.25942	20.726	1.2201
185.00	22.050	1.0270	11.358	0.30057	21.329	1.5037
186.00	21.972	0.86238	10.637	0.23773	20.831	1.2391
187.00	22.034	0.87222	10.416	0.23341	21.667	1.2956
188.00	21.671	0.98635	9.8257	0.25558	21.240	1.4682
189.00	22.521	1.0472	9.7412	0.25688	20.172	1.4183
190.00	23.049	1.1667	9.4261	0.27155	20.682	1.5862
191.00	23.353	1.3041	9.2588	0.29322	20.901	1.7649
192.00	22.284	1.2800	8.8754	0.28558	22.207	1.9155
193.00	21.386	1.0764	8.2938	0.23509	21.797	1.6524
194.00	22.338	1.2737	8.1908	0.26754	23.106	2.0036
195.00	21.581	1.3419	7.9808	0.27635	21.879	2.0363
196.00	24.386	1.4710	7.7972	0.26599	18.736	1.7063
197.00	23.341	1.3773	7.7817	0.25767	23.352	2.0712
198.00	23.868	1.5040	7.3928	0.26957	21.753	2.0965
199.00	23.551	1.6279	7.2977	0.29010	23.633	2.4897
200.00	23.702	1.6014	7.0175	0.27141	20.421	2.0973
201.00	26.252	2.0286	7.1317	0.32600	20.908	2.5028
202.00	24.927	1.8757	6.6043	0.28681	21.771	2.5019
203.00	21.183	1.5668	5.9267	0.24606	22.042	2.4511
204.00	22.106	1.7417	6.1621	0.27280	24.997	2.9627
205.00	25.847	2.2116	6.2317	0.30720	19.757	2.5791
206.00	22.545	1.7828	5.8037	0.25771	24.787	2.9475
207.00	22.925	1.6105	5.5598	0.22676	22.005	2.3689
208.00	24.709	2.2066	5.8073	0.29140	26.743	3.5926
209.00	30.457	3.5783	6.3306	0.44938	22.014	4.0567
210.00	34.678	4.9816	6.4594	0.58160	26.618	6.1317
211.00	23.410	1.9581	5.3792	0.25675	27.205	3.4528
212.00	22.962	1.9958	4.9187	0.24375	29.042	3.8285
213.00	25.477	2.6721	5.4860	0.32404	24.216	3.8256
214.00	20.795	1.9224	4.4795	0.22857	23.037	3.1721
215.00	31.377	4.0965	5.5462	0.43920	30.963	6.3553
216.00	15.488	4.0208	3.0164	0.43686	16.023	6.2324
217.00	12.692	4.5090	2.9959	0.54533	22.558	11.474
218.00	25.166	2.2881	4.8315	0.25967	24.272	3.4172
219.00	17.162	5.8511	3.0960	0.54958	19.178	9.4397
220.00	28.685	3.0981	4.9326	0.31086	27.583	4.5785
221.00	11.314	5.4775	2.6821	0.53800	22.931	14.418
222.00	11.644	4.6711	2.4353	0.42875	20.628	11.011
224.00	13.302	6.1034	2.6913	0.60638	26.084	16.775
225.00	11.282	4.3508	2.2623	0.35944	21.863	10.925
227.00	8.5538	9.1591	2.3658	0.59995	36.350	43.068
228.00	8.5163	8.3131	2.4471	0.56076	38.979	42.035
230.00	11.439	7.3989	2.3292	0.61604	38.450	32.128
231.00	17.469	7.2959	2.1786	0.45136	24.442	14.380
235.00	12.981	7.4009	2.8622	0.86695	34.500	28.701
236.00	9.0684	9.6126	2.2689	0.64019	37.126	44.583
240.00	13.052	7.9303	2.1707	0.69591	34.263	30.266
246.00	12.946	8.7825	3.7099	1.3653	123.92	124.05

## Sheet: RRM1-2;(GU)6
								Figure 5-Figure supplement 8b
frame	Rg	dRg	I(0)*4000	dI0*4000	M	dM
34.000	4.1306	17.905	2.6060	0.62386	116.33	507.31
35.000	12.654	4.7418	3.0905	0.58983	43.475	23.255
36.000	24.009	2.3424	5.6547	0.30565	56.397	8.2126
37.000	25.029	2.1730	6.7057	0.33979	61.745	8.2396
38.000	26.391	2.1760	7.6090	0.36127	60.607	7.6219
39.000	27.362	1.8486	8.6926	0.35182	51.272	5.4060
40.000	27.228	1.7374	9.5004	0.36226	49.829	4.9548
41.000	28.854	1.6221	10.417	0.34419	56.081	4.8656
42.000	27.441	1.7026	11.301	0.40852	55.113	5.2508
43.000	28.579	1.4611	12.534	0.38220	49.050	3.9034
44.000	28.231	1.4179	13.606	0.40591	44.985	3.5083
45.000	27.367	1.1085	14.719	0.35291	48.630	3.0525
46.000	28.086	1.1174	15.886	0.37175	44.120	2.7102
47.000	26.226	0.83313	16.550	0.31104	50.427	2.4817
48.000	27.917	0.92121	18.029	0.35858	48.198	2.4911
49.000	27.911	0.90999	19.317	0.37894	46.924	2.3937
50.000	26.702	0.87975	20.172	0.39361	48.063	2.4547
51.000	28.353	0.94662	21.778	0.43594	50.180	2.6159
52.000	27.269	0.73440	22.184	0.35694	47.272	1.9836
53.000	27.051	0.86698	23.361	0.44715	45.924	2.2928
54.000	28.095	0.76236	24.453	0.39804	45.688	1.9363
55.000	28.090	0.68190	25.580	0.36726	45.775	1.7212
56.000	27.891	0.73519	26.407	0.42012	48.375	1.9988
57.000	27.283	0.67746	26.665	0.39525	45.399	1.7556
58.000	27.329	0.60429	27.284	0.36151	47.127	1.6265
59.000	28.902	0.70225	28.864	0.41601	48.213	1.8177
60.000	27.886	0.75350	29.422	0.47875	46.271	1.9572
61.000	29.181	0.68932	29.934	0.42549	43.531	1.6090
62.000	27.842	0.57214	29.996	0.37011	46.433	1.4911
63.000	27.927	0.67411	30.214	0.43965	44.852	1.6958
64.000	27.264	0.63751	30.236	0.42132	45.251	1.6461
65.000	27.518	0.57548	30.095	0.37004	43.916	1.4177
66.000	28.343	0.68020	30.749	0.44347	46.604	1.7487
67.000	27.092	0.50519	30.261	0.33801	44.298	1.2891
68.000	28.951	0.59753	31.407	0.38516	46.569	1.4928
69.000	27.610	0.55057	30.258	0.36246	46.056	1.4356
70.000	28.389	0.53328	30.843	0.34971	45.402	1.3370
71.000	26.731	0.62875	29.503	0.41242	44.120	1.6120
72.000	27.631	0.60213	29.878	0.38580	44.537	1.5049
73.000	27.542	0.59152	29.392	0.37753	45.660	1.5289
74.000	26.639	0.59260	28.216	0.37049	44.071	1.5168
75.000	27.324	0.72398	28.369	0.44405	44.713	1.8338
76.000	27.055	0.63662	28.282	0.39851	44.998	1.6520
77.000	28.273	0.57152	28.096	0.33979	43.372	1.3672
78.000	26.887	0.71277	26.539	0.41451	44.840	1.8371
79.000	26.223	0.60393	25.374	0.34498	43.344	1.5445
80.000	27.533	0.68708	26.090	0.38981	47.073	1.8326
81.000	28.460	0.67870	25.550	0.36821	43.597	1.6309
82.000	26.319	0.64585	24.158	0.35259	45.357	1.7297
83.000	27.240	0.68148	23.854	0.35013	43.285	1.6695
84.000	27.726	0.83036	23.158	0.41191	41.507	1.9302
85.000	27.598	0.72314	23.052	0.35633	44.409	1.7997
86.000	26.343	0.87524	21.835	0.43153	42.696	2.2046
87.000	27.215	0.82249	21.971	0.39535	44.677	2.0996
88.000	26.762	0.81705	20.795	0.37779	45.189	2.1446
89.000	25.935	0.81762	20.172	0.37460	42.331	2.0622
90.000	25.375	0.83136	19.183	0.37126	43.707	2.2164
91.000	25.903	0.79218	19.058	0.33757	39.922	1.8684
92.000	26.118	0.93692	18.808	0.39627	39.153	2.1667
93.000	25.744	0.75681	18.733	0.32378	42.273	1.9183
94.000	24.409	0.81390	17.738	0.34682	39.467	2.0283
95.000	26.836	1.0175	18.793	0.41820	39.635	2.3173
96.000	24.040	0.77099	17.532	0.32707	38.821	1.9100
97.000	25.344	0.79421	18.053	0.32901	36.565	1.7576
98.000	25.822	0.82836	18.593	0.35395	33.862	1.6859
99.000	25.364	0.76919	18.387	0.32965	33.867	1.5904
100.00	23.283	0.61554	18.185	0.27671	34.126	1.3757
101.00	23.729	0.72632	18.906	0.33997	32.360	1.5282
102.00	23.970	0.69704	19.737	0.33381	32.604	1.4544
103.00	23.916	0.67052	20.338	0.33552	32.154	1.3922
104.00	23.362	0.59935	21.029	0.31697	31.296	1.2388
105.00	22.419	0.51492	21.461	0.28764	27.754	0.97972
106.00	21.578	0.42032	22.488	0.25498	29.432	0.87985
107.00	21.948	0.47622	23.810	0.29836	27.943	0.92630
108.00	22.433	0.44800	25.418	0.29374	28.440	0.86869
109.00	22.555	0.45165	26.777	0.30920	27.233	0.83243
110.00	21.835	0.38379	28.429	0.29002	27.114	0.73018
111.00	20.916	0.32178	29.134	0.25736	26.374	0.61785
112.00	21.429	0.32224	30.693	0.26921	25.249	0.58339
113.00	21.562	0.33910	32.842	0.29788	25.132	0.60338
114.00	20.760	0.31636	34.188	0.30191	25.456	0.59383
115.00	21.027	0.28626	36.233	0.28528	25.368	0.52805
116.00	20.565	0.24544	37.280	0.25712	24.742	0.45130
117.00	21.254	0.28642	39.676	0.31165	24.939	0.51618
118.00	20.565	0.22184	41.099	0.25643	24.944	0.41144
119.00	20.538	0.22983	42.854	0.27651	24.943	0.42606
120.00	21.047	0.24183	44.751	0.29896	24.262	0.42754
121.00	21.008	0.22815	45.988	0.28931	24.173	0.40178
122.00	20.450	0.21699	47.036	0.28947	24.491	0.39799
123.00	20.417	0.19253	48.122	0.26255	24.294	0.35037
124.00	20.333	0.18870	48.875	0.26044	23.618	0.33376
125.00	20.633	0.20159	50.656	0.28778	23.956	0.35899
126.00	20.370	0.18180	51.614	0.26544	23.975	0.32649
127.00	20.445	0.20802	52.226	0.30844	23.776	0.37066
128.00	20.781	0.21208	53.292	0.31671	23.772	0.37241
129.00	20.506	0.19517	53.359	0.29649	24.288	0.35538
130.00	20.174	0.17205	53.006	0.26219	23.944	0.31274
131.00	20.638	0.20729	53.752	0.31446	23.710	0.36561
132.00	20.503	0.17895	53.448	0.27196	23.796	0.31904
133.00	20.028	0.20134	52.765	0.30778	23.818	0.36680
134.00	20.278	0.17912	52.822	0.27026	23.549	0.31834
135.00	20.940	0.22100	53.419	0.32498	23.581	0.37981
136.00	20.284	0.19530	51.712	0.28840	24.015	0.35385
137.00	19.981	0.19335	50.932	0.28444	23.517	0.34753
138.00	20.044	0.18643	49.918	0.26958	23.260	0.33154
139.00	20.214	0.19953	49.338	0.28037	23.663	0.35622
140.00	20.114	0.20826	48.056	0.28726	23.778	0.37606
141.00	20.293	0.20195	47.067	0.27112	23.452	0.35704
142.00	20.313	0.23197	46.263	0.30627	23.917	0.41820
143.00	20.168	0.19068	44.690	0.24525	23.250	0.33681
144.00	20.010	0.22202	43.255	0.27743	23.265	0.39458
145.00	19.770	0.22058	41.939	0.27153	23.046	0.39391
146.00	19.851	0.21572	40.879	0.25627	23.222	0.38530
147.00	20.154	0.23650	39.816	0.27007	23.218	0.41646
148.00	19.703	0.24294	37.939	0.26915	23.369	0.43928
149.00	20.073	0.27312	36.981	0.29282	23.414	0.48886
150.00	20.149	0.23532	35.673	0.24090	23.451	0.41873
151.00	19.523	0.25098	33.817	0.25192	23.145	0.45545
152.00	19.584	0.25128	32.395	0.23938	22.399	0.43837
153.00	19.759	0.27104	31.187	0.24744	22.997	0.48237
154.00	19.358	0.28083	29.830	0.24992	23.591	0.52286
155.00	19.671	0.27758	28.876	0.23405	23.069	0.49580
156.00	20.359	0.31824	27.982	0.25132	23.360	0.55624
157.00	19.593	0.25994	26.390	0.20136	23.068	0.46646
158.00	19.671	0.35704	25.177	0.26150	23.379	0.64491
159.00	20.169	0.30744	24.560	0.21607	22.945	0.53415
160.00	19.449	0.34032	22.907	0.23037	23.194	0.61835
161.00	19.629	0.39596	22.008	0.25670	23.727	0.73175
162.00	19.401	0.39562	20.696	0.24136	22.473	0.69624
163.00	19.873	0.43797	20.403	0.25630	23.269	0.77764
164.00	19.032	0.43921	18.939	0.25046	23.918	0.83955
165.00	19.259	0.39824	17.891	0.21369	22.727	0.71807
166.00	20.334	0.54553	17.807	0.27362	23.389	0.95415
167.00	19.601	0.48929	16.513	0.23686	23.360	0.88832
168.00	19.618	0.47946	15.838	0.22274	23.217	0.86512
169.00	19.563	0.52900	14.707	0.22728	22.791	0.93597
170.00	19.570	0.54650	14.529	0.23262	23.485	0.99786
171.00	19.272	0.55161	13.762	0.22443	21.648	0.93941
172.00	20.331	0.63788	13.541	0.24527	23.025	1.1034
173.00	18.706	0.54074	12.131	0.20100	21.516	0.94617
174.00	19.020	0.68674	11.817	0.24487	22.694	1.2474
175.00	17.946	0.55729	11.027	0.19370	22.411	1.0508
176.00	20.162	0.78646	11.017	0.24755	22.793	1.3563
177.00	19.782	0.74519	10.681	0.22957	23.743	1.3571
178.00	19.846	0.88293	10.170	0.25719	24.111	1.6241
179.00	19.338	0.74182	9.2854	0.20413	21.269	1.2410
180.00	19.724	0.85721	9.2767	0.22553	23.524	1.5341
181.00	18.079	0.76143	8.3237	0.19831	25.173	1.6009
182.00	18.142	0.72444	8.1100	0.18372	24.942	1.5063
183.00	20.740	1.0095	8.2915	0.23278	24.490	1.8198
184.00	18.936	1.0212	7.4744	0.22764	23.979	1.9509
185.00	20.137	1.0938	7.4108	0.23287	25.446	2.1137
186.00	17.589	0.93296	6.6768	0.20094	26.065	2.0912
187.00	17.744	0.96321	6.5603	0.20234	25.814	2.1211
188.00	17.100	0.94246	6.0684	0.19000	24.129	2.0128
189.00	18.611	1.1265	6.3239	0.21746	24.526	2.2470
190.00	17.932	1.1667	5.6424	0.20358	22.869	2.2220
191.00	17.571	1.1643	5.6419	0.20917	31.625	3.1449
192.00	19.324	1.3802	5.7212	0.23681	28.400	3.1052
193.00	19.346	1.3927	5.3589	0.22406	26.894	2.9675
194.00	18.843	1.3054	5.2568	0.20809	31.971	3.3634
195.00	21.808	1.9511	5.3188	0.27754	27.345	3.7588
196.00	15.287	4.3059	3.7905	0.53358	23.738	9.4537
197.00	13.737	2.9139	3.3297	0.38748	23.212	7.3096
198.00	18.238	1.2660	4.1685	0.16745	28.539	3.0302
199.00	16.741	1.3386	4.1284	0.18761	29.199	3.5346
200.00	13.026	3.7010	2.8942	0.43991	22.157	9.2194
201.00	12.616	2.8668	2.6628	0.31173	24.351	7.9452
202.00	12.614	4.2293	2.7744	0.47907	25.521	12.285
204.00	12.695	3.3932	2.2073	0.29450	21.177	7.9982
205.00	13.102	4.8921	2.3701	0.47896	28.069	15.444

## Sheet: RRM1-2;(GU)12
								Figure 5-Figure supplement 8b
frame	Rg	dRg	I0*45	dI0*45	M	dM
2.0000	7.4736	13.256	2.7309	0.87597	4241.9	8001.0
4.0000	7.7876	13.431	2.6001	0.88054	1605.7	2975.2
5.0000	12.580	9.1716	2.6649	0.95734	3801.0	3890.7
7.0000	10.287	10.303	2.3175	0.79526	97563	1.1846e+05
15.000	7.2314	12.951	1.6642	0.50461	2790.2	5275.7
21.000	13.638	9.7984	2.6568	0.95799	3640.4	3705.8
24.000	9.8903	9.4805	2.6381	0.80088	930.32	1055.6
30.000	27.073	3.3370	3.3350	0.23950	63.608	12.039
32.000	26.904	2.8909	4.7943	0.29342	61.465	10.011
33.000	27.270	2.4294	5.8537	0.30571	42.656	5.8559
34.000	30.117	2.2167	7.6324	0.34048	56.633	6.5504
35.000	27.754	1.6616	8.7552	0.30523	50.170	4.6108
36.000	32.440	1.3778	11.703	0.31000	52.441	3.5608
37.000	31.461	1.1362	13.349	0.29485	49.506	2.8249
38.000	29.738	1.0659	15.083	0.32706	46.061	2.5916
39.000	28.174	0.76547	17.033	0.27378	48.913	2.0587
40.000	29.801	0.87059	20.386	0.36295	45.721	2.1059
41.000	28.970	0.59394	23.268	0.28647	48.910	1.5671
42.000	30.170	0.65531	26.480	0.35191	47.284	1.6231
43.000	29.693	0.59364	29.015	0.35179	46.570	1.4636
44.000	29.238	0.56266	32.140	0.36540	49.020	1.4602
45.000	30.358	0.52804	35.162	0.37311	47.881	1.3138
46.000	29.671	0.37667	37.513	0.28936	46.950	0.93802
47.000	29.478	0.47253	40.373	0.39605	45.655	1.1567
48.000	29.067	0.43640	42.793	0.38280	46.714	1.0910
49.000	29.391	0.34872	45.236	0.32655	46.149	0.86241
50.000	29.486	0.31585	47.991	0.30953	46.964	0.78747
51.000	29.957	0.33672	50.057	0.34229	46.450	0.82226
52.000	30.017	0.36937	51.898	0.39024	45.976	0.89338
53.000	30.075	0.35504	53.548	0.38745	46.864	0.87522
54.000	29.684	0.33373	54.744	0.37548	47.269	0.83838
55.000	29.984	0.32692	56.035	0.37266	46.171	0.79408
56.000	29.408	0.31378	56.404	0.36740	46.504	0.78309
57.000	30.338	0.33810	57.947	0.39502	47.799	0.84168
58.000	30.330	0.38320	57.885	0.44770	47.988	0.95845
59.000	30.399	0.30598	57.621	0.35628	46.547	0.74219
60.000	30.069	0.29830	57.018	0.34674	47.391	0.74380
61.000	30.136	0.36501	56.958	0.42440	46.688	0.89659
62.000	29.521	0.30181	55.543	0.34276	45.553	0.73005
63.000	29.136	0.27648	54.590	0.31648	46.300	0.69370
64.000	30.691	0.31968	55.102	0.35153	47.876	0.78856
65.000	30.353	0.34793	53.984	0.37871	46.329	0.83938
66.000	30.337	0.33993	50.845	0.34813	46.723	0.82672
67.000	29.573	0.43467	49.269	0.43821	47.643	1.0994
68.000	30.024	0.40268	47.703	0.39086	46.050	0.97515
69.000	29.944	0.42204	46.403	0.39746	47.958	1.0639
70.000	29.834	0.43150	44.595	0.38887	45.864	1.0391
71.000	30.090	0.49234	43.586	0.43664	46.822	1.2112
72.000	30.405	0.55942	42.054	0.47403	47.708	1.3883
73.000	30.271	0.60808	40.184	0.49035	46.542	1.4712
74.000	30.398	0.44107	38.585	0.34240	46.974	1.0769
75.000	29.649	0.40675	36.746	0.30570	46.161	0.99547
76.000	29.439	0.52268	34.955	0.37805	47.205	1.3210
77.000	29.890	0.57011	34.097	0.39258	47.559	1.4220
78.000	30.006	0.62122	32.808	0.41297	46.955	1.5305
79.000	30.278	0.63350	31.359	0.39813	47.409	1.5598
80.000	30.729	0.65336	30.111	0.39184	47.196	1.5861
81.000	29.567	0.59540	28.426	0.34372	48.142	1.5150
82.000	28.551	0.47722	26.682	0.26565	48.126	1.2512
83.000	29.350	0.54652	25.914	0.29188	47.121	1.3772
84.000	30.008	0.60485	24.958	0.29935	48.348	1.5149
85.000	29.099	0.69770	23.369	0.33302	46.002	1.7134
86.000	29.338	0.80527	22.621	0.37444	46.477	1.9988
87.000	30.834	0.77425	22.004	0.33853	43.947	1.7453
88.000	30.396	0.94989	20.902	0.39832	47.926	2.3621
89.000	29.391	0.69879	20.071	0.28885	46.033	1.7185
90.000	30.383	1.1117	19.295	0.42172	46.649	2.6592
91.000	29.987	0.85295	18.455	0.31716	45.989	2.0517
92.000	30.065	1.0893	17.720	0.38276	44.576	2.5133
93.000	31.350	0.80900	17.209	0.27073	44.694	1.8187
94.000	30.063	1.0450	16.438	0.34092	46.070	2.4931
95.000	31.779	1.1341	16.049	0.34964	45.538	2.5648
96.000	31.264	1.0799	15.627	0.33096	44.878	2.4529
97.000	30.247	1.0101	14.732	0.29664	43.063	2.2529
98.000	29.464	0.92371	14.157	0.26441	44.047	2.1480
99.000	30.111	1.0930	13.750	0.30434	43.541	2.4926
100.00	29.049	1.2285	13.388	0.33355	48.592	3.1758
101.00	29.337	1.1029	12.700	0.28246	43.064	2.5081
102.00	29.743	1.2611	12.629	0.32542	45.980	3.0686
103.00	30.650	1.6932	12.312	0.40380	47.161	4.0444
104.00	31.515	1.3076	12.185	0.30996	44.630	2.9300
105.00	28.288	1.2921	11.212	0.30227	44.896	3.1725
106.00	27.955	1.3713	11.045	0.31887	43.945	3.3294
107.00	27.098	1.1923	10.491	0.26908	42.352	2.8622
108.00	26.783	1.0529	10.048	0.23080	38.468	2.3260
109.00	26.542	1.1099	9.9209	0.23797	37.970	2.4164
110.00	27.926	1.2933	9.9046	0.27105	39.300	2.8176
111.00	30.514	1.5149	10.271	0.31224	36.995	2.9040
112.00	26.975	1.2957	9.6040	0.27258	41.939	3.1185
113.00	28.788	1.3264	9.7392	0.27013	38.213	2.7556
114.00	27.595	1.5148	9.2017	0.29498	38.980	3.2901
115.00	26.713	1.4791	9.1044	0.29144	41.722	3.5314
116.00	30.679	1.3901	9.6350	0.26515	31.840	2.2699
117.00	27.576	1.5146	9.0220	0.28913	36.386	3.0713
118.00	27.857	1.1701	9.0927	0.22762	35.484	2.3190
119.00	26.020	1.0568	8.7534	0.20420	35.002	2.1651
120.00	27.510	1.3019	8.9039	0.24481	35.319	2.5625
121.00	26.070	1.1715	8.5400	0.22455	35.865	2.4809
122.00	24.579	1.1572	7.9637	0.21684	29.080	2.0934
123.00	26.296	1.2228	8.7367	0.23517	32.779	2.3318
124.00	25.818	1.1876	8.6144	0.23171	35.110	2.4851
125.00	24.720	0.97132	8.5237	0.19292	28.100	1.6843
126.00	28.439	1.2687	9.1701	0.24036	30.894	2.1266
127.00	25.098	1.2646	8.5447	0.24803	29.805	2.2911
128.00	29.071	1.6581	9.4549	0.32317	29.073	2.5883
129.00	25.599	1.2843	8.8479	0.25367	30.515	2.3249
130.00	24.994	1.0982	8.8853	0.22281	28.509	1.9009
131.00	26.399	1.2027	8.9412	0.23511	30.952	2.1537
132.00	23.529	0.89782	8.7150	0.19124	30.290	1.7616
133.00	25.325	1.0772	9.2919	0.22951	27.667	1.8036
134.00	24.597	0.84391	9.1759	0.18237	29.243	1.5355
135.00	22.450	0.84158	8.6393	0.18459	26.179	1.4882
136.00	22.361	0.74383	8.8121	0.16356	25.887	1.2904
137.00	24.252	0.98333	9.3748	0.21597	28.693	1.7610
138.00	24.163	1.0329	9.4465	0.23356	26.298	1.7189
139.00	22.402	0.97624	9.0859	0.22616	26.047	1.7233
140.00	24.080	0.99860	9.5133	0.22777	24.906	1.5777
141.00	23.375	0.84800	9.3595	0.19396	24.047	1.3245
142.00	23.767	0.87011	9.5113	0.19924	25.262	1.4055
143.00	23.322	0.83327	9.6029	0.19246	25.753	1.3828
144.00	23.444	1.0178	9.4157	0.23349	25.451	1.6776
145.00	25.182	1.0424	10.049	0.23750	24.335	1.5290
146.00	23.064	0.85513	9.4542	0.20230	23.017	1.3033
147.00	24.867	1.0452	9.8165	0.23972	24.601	1.5851
148.00	22.897	0.92132	9.3744	0.21720	23.904	1.4670
149.00	23.172	0.86462	9.4095	0.19786	23.263	1.3079
150.00	22.294	0.76911	9.2846	0.18321	24.177	1.2673
151.00	24.398	0.95138	9.5982	0.21409	23.267	1.3786
152.00	22.094	0.89507	8.9791	0.20452	20.172	1.2297
153.00	22.871	0.94036	9.4476	0.22348	25.043	1.5697
154.00	22.016	0.83432	9.0713	0.19492	25.510	1.4617
155.00	23.090	0.91990	8.9931	0.20663	23.142	1.4074
156.00	22.533	1.0069	8.9289	0.22557	23.873	1.6102
157.00	21.657	0.74844	8.5166	0.16758	21.629	1.1328
158.00	22.449	0.83534	8.7714	0.18400	21.628	1.2128
159.00	22.203	1.0070	8.6280	0.22352	24.557	1.6910
160.00	21.153	0.73976	8.0884	0.16054	21.372	1.1307
161.00	23.541	1.0692	8.3566	0.21637	21.955	1.5123
162.00	22.784	1.0149	7.9700	0.20293	22.366	1.5132
163.00	23.524	0.96589	8.3036	0.19711	21.243	1.3334
164.00	23.298	0.93660	8.0289	0.18356	24.581	1.4966
165.00	21.082	0.80325	7.5819	0.16281	24.098	1.3835
166.00	22.048	1.0284	7.4691	0.19354	22.661	1.5800
167.00	21.184	0.92463	7.1699	0.17533	22.530	1.4769
168.00	21.294	0.95081	6.9180	0.17283	22.796	1.5275
169.00	23.435	1.3558	7.2785	0.24140	23.124	2.0353
170.00	23.263	1.2948	7.0723	0.22639	23.510	1.9944
171.00	20.978	1.1161	6.5746	0.19771	23.539	1.8902
172.00	22.238	1.1432	6.5674	0.19150	24.121	1.8752
173.00	22.318	1.2042	6.5507	0.19531	24.026	1.9321
174.00	20.681	1.0868	5.9798	0.17445	22.844	1.7938
175.00	23.305	1.3290	6.3954	0.20557	24.286	2.0871
176.00	22.280	1.2466	6.0002	0.19219	26.085	2.2187
177.00	24.428	1.6479	5.9410	0.22880	22.572	2.3111
178.00	21.637	1.3890	5.4434	0.19315	22.442	2.1475
179.00	24.926	1.6266	5.8820	0.22139	22.184	2.2101
180.00	21.657	1.2814	5.1607	0.17171	23.697	2.1100
181.00	22.690	1.3610	5.0751	0.17447	23.885	2.1793
182.00	22.627	1.6368	5.0492	0.20634	23.161	2.5279
183.00	37.593	4.5277	6.1740	0.49407	28.875	5.7836
184.00	23.877	1.8613	5.0094	0.22611	29.941	3.5712
185.00	22.773	1.6525	4.7336	0.19428	24.563	2.6911
186.00	21.832	1.6346	4.5280	0.19306	26.498	3.0069
187.00	23.798	2.1699	4.5089	0.23395	24.471	3.3805
188.00	20.974	1.5625	4.0279	0.17159	25.014	2.8309
189.00	20.571	1.2952	3.9815	0.14192	26.593	2.5293
190.00	24.316	1.9991	4.2198	0.19727	23.127	2.8793
191.00	25.734	2.0338	4.0459	0.18836	23.076	2.8183
192.00	24.277	2.0835	4.0946	0.19716	27.985	3.6099
193.00	24.159	2.2512	3.8951	0.20488	24.208	3.4020
194.00	24.471	2.3405	3.9082	0.21500	27.869	4.0629
195.00	25.234	2.5919	3.7789	0.21857	26.247	4.0604
196.00	18.359	2.5880	2.7163	0.21649	20.221	4.3028
197.00	21.645	1.8278	3.3737	0.15909	27.668	3.5025
198.00	22.581	2.0575	3.4210	0.17227	29.856	4.0549
199.00	25.276	2.4461	3.4600	0.19630	23.781	3.5466
200.00	23.041	2.2484	3.3650	0.18862	36.601	5.4399
201.00	21.826	1.9666	2.9520	0.14780	30.143	4.0606
202.00	19.687	3.0441	2.4166	0.21458	18.957	4.4639
203.00	21.661	2.4710	3.0431	0.18158	32.262	5.3262
204.00	23.956	4.6570	2.6379	0.30032	28.718	8.5978
205.00	16.738	1.5878	2.4958	0.12708	26.245	3.6525
206.00	18.966	4.3095	2.1480	0.23141	18.224	5.7066
207.00	11.496	4.3951	1.6691	0.27304	25.743	12.954
208.00	20.652	5.7931	2.1011	0.29738	21.683	8.6408
209.00	32.730	5.5183	3.1947	0.32695	39.721	10.533
210.00	13.002	4.0919	1.6264	0.27208	18.601	8.5439
211.00	22.615	6.5305	2.0783	0.35170	26.428	11.758
213.00	13.078	3.7757	1.5928	0.24974	27.131	11.564
215.00	8.8069	5.8726	1.5085	0.25260	33.289	24.840
216.00	14.040	4.5621	1.6571	0.29251	36.355	17.443
217.00	13.903	4.8162	1.2818	0.22187	17.036	8.3437
218.00	12.708	4.4658	1.4548	0.24453	23.460	11.409
219.00	5.3836	10.661	1.3014	0.24183	64.980	130.92
220.00	12.499	4.8685	1.6498	0.29135	34.103	17.931
221.00	10.128	6.1760	1.3048	0.26426	29.560	21.639
222.00	6.8588	8.6224	1.2992	0.24876	70.617	92.803
223.00	5.2461	11.506	1.1759	0.22982	67.313	149.96
224.00	8.5858	7.1173	1.2853	0.25430	35.320	32.444
225.00	6.5225	9.7089	1.2935	0.26520	100.18	154.68
226.00	10.874	5.6933	1.1010	0.22069	30.355	20.017
227.00	14.803	5.9808	1.4620	0.31676	39.815	23.589
228.00	13.573	6.1097	1.6393	0.34766	116.71	72.182
230.00	13.021	4.9026	1.1918	0.24633	30.219	16.896
231.00	11.742	6.0290	1.3756	0.31529	50.412	34.699
232.00	10.846	6.1082	1.4243	0.30553	66.330	46.958
238.00	6.1582	12.278	1.4031	0.34348	131.71	270.39
242.00	3.6034	23.346	1.4468	0.39408	379.91	2470.1
246.00	10.637	7.4364	1.6606	0.42526	111.32	96.481
249.00	12.732	6.9399	1.8004	0.51505	349.29	276.02
