# Supplementary material for: The cooperative binding of TDP-43 to GU-rich RNA repeats antagonizes TDP-43 aggregation
Source: eLife. 2021 Sep 7;10:e67605. doi: 10.7554/eLife.67605 (PMC8523171; doi:10.7554/eLife.67605)
Supplement: Figure 5—figure supplement 2—source data 1. [file elife-67605-fig5-figsupp2-data1.xlsx]

## Sheet: Figure 5-Figure supplement 9a
Time (ns)	Angle (°)
0	84.854225
1	85.517479
2	85.817429
3	79.258636
4	81.339508
5	82.301277
6	81.025887
7	81.512589
8	82.736382
9	80.541176
10	75.525085
11	79.453156
12	81.579247
13	84.760338
14	85.337624
15	88.91523
16	80.882584
17	83.737129
18	86.99144
19	93.244431
20	88.359299
21	89.741692
22	87.570183
23	81.981903
24	87.439529
25	81.699745
26	82.735168
27	84.488289
28	84.406158
29	79.316559
30	85.618492
31	81.414841
32	86.943619
33	85.793602
34	83.014793
35	85.776711
36	94.797516
37	92.856812
38	84.58445
39	91.165718
40	88.50943
41	88.342659
42	95.921806
43	91.190804
44	88.811646
45	86.76342
46	85.147575
47	93.373665
48	91.895203
49	99.444565
50	93.280823
51	93.650536
52	98.190262
53	97.406723
54	93.734535
55	93.460258
56	92.709633
57	88.860352
58	94.958725
59	99.964714
60	98.809731
61	104.43409
62	104.33466
63	99.342583
64	103.34194
65	97.893852
66	94.495796
67	100.26813
68	99.018478
69	102.93951
70	101.67651
71	102.96146
72	102.22441
73	97.378784
74	97.625656
75	105.64013
76	96.929375
77	104.73476
78	101.75912
79	96.781036
80	104.50771
81	106.1303
82	104.2255
83	103.96163
84	102.46261
85	99.766548
86	97.32888
87	103.6925
88	100.72181
89	103.08774
90	91.352745
91	93.076698
92	94.400665
93	91.029076
94	93.04538
95	96.163834
96	101.45524
97	104.16652
98	97.869019
99	94.838203
100	98.925285
101	90.462975
102	98.376297
103	97.487518
104	95.014915
105	98.949684
106	90.018608
107	100.16988
108	95.188942
109	98.326225
110	91.155594
111	96.944252
112	98.400459
113	94.922478
114	89.037086
115	96.835228
116	95.790001
117	92.424675
118	89.869736
119	88.994064
120	89.321632
121	90.51532
122	86.838066
123	95.11248
124	87.035576
125	89.924561
126	97.066139
127	86.557388
128	104.65459
129	97.540504
130	94.34481
131	91.900337
132	93.935966
133	98.247353
134	96.588829
135	93.5261
136	99.554573
137	94.915703
138	94.107803
139	93.548164
140	100.76279
141	99.077026
142	100.16463
143	94.012215
144	89.508385
145	98.518745
146	89.895195
147	92.155289
148	91.494247
149	88.59449
150	88.019272
151	86.412178
152	92.006447
153	92.179008
154	88.277603
155	98.758842
156	94.529205
157	101.32287
158	100.81932
159	87.011826
160	94.748306
161	92.986359
162	104.12422
163	100.33055
164	99.688416
165	93.976311
166	100.23441
167	99.844902
168	95.854515
169	90.054649
170	91.221733
171	93.897514
172	84.088997
173	87.854652
174	94.401596
175	87.946335
176	97.421196
177	99.030899
178	87.632912
179	99.315506
180	91.941505
181	92.150635
182	90.926857
183	95.780876
184	97.762337
185	104.07977
186	95.640724
187	94.893303
188	93.16301
189	91.0373
190	83.642746
191	92.440056
192	103.84945
193	99.594315
194	99.835167
195	96.006851
196	95.745949
197	98.648529
198	98.992531
199	98.808975
200	97.502632
201	99.489571
202	95.77713
203	95.859146
204	90.501793
205	97.815765
206	96.988068
207	93.650787
208	95.209435
209	97.466568
210	90.293335
211	101.4815
212	96.981644
213	97.064056
214	93.537521
215	96.308823
216	101.85062
217	94.607338
218	97.568565
219	101.2809
220	100.7822
221	101.55588
222	99.849113
223	103.2175
224	105.23192
225	103.53866
226	102.16829
227	92.487823
228	101.53783
229	103.65676
230	106.27858
231	106.3787
232	94.626587
233	105.32487
234	103.26659
235	97.673866
236	103.19736
237	102.09647
238	102.84443
239	95.54213
240	93.306015
241	95.113144
242	100.01836
243	95.102242
244	97.197571
245	93.635277
246	95.281845
247	92.700867
248	93.743187
249	93.198936
250	105.23505
251	100.50516
252	96.777687
253	91.062965
254	99.870476
255	109.20445
256	98.601395
257	95.434677
258	92.797615
259	93.254799
260	105.20705
261	102.39561
262	107.29074
263	102.65171
264	103.6338
265	103.93659
266	111.53952
267	102.28577
268	105.49371
269	101.32545
270	116.19835
271	112.64959
272	98.089844
273	107.25697
274	108.22758
275	103.6852
276	100.74632
277	110.54492
278	105.44698
279	95.287193
280	106.09912
281	97.653671
282	101.95293
283	109.64013
284	109.77354
285	107.13209
286	104.70457
287	102.98273
288	104.48344
289	97.526962
290	100.55893
291	100.15958
292	104.99548
293	106.83231
294	100.04003
295	102.9202
296	110.49799
297	100.49719
298	103.88012
299	103.7115
300	104.55434
301	103.33791
302	104.91912
303	103.23953
304	103.4929
305	105.01074
306	102.38381
307	103.13382
308	104.07302
309	96.402237
310	98.93383
311	100.13286
312	105.41132
313	103.21652
314	108.33269
315	97.698318
316	94.334702
317	98.760147
318	97.730949
319	100.89362
320	98.523323
321	97.091484
322	95.117462
323	102.98914
324	107.21898
325	105.04048
326	107.24376
327	103.34463
328	113.64428
329	100.81037
330	105.64333
331	107.34672
332	103.59832
333	101.3742
334	102.89969
335	107.97179
336	95.390778
337	100.53677
338	99.005638
339	92.36441
340	97.343582
341	94.068054
342	98.005264
343	95.323753
344	97.789795
345	97.706795
346	104.30775
347	100.00433
348	100.66163
349	102.86748
350	99.536774
351	94.768257
352	98.959885
353	105.42031
354	97.000778
355	94.015343
356	99.451889
357	100.98822
358	97.173752
359	96.988716
360	96.12587
361	95.713028
362	95.506042
363	94.272369
364	99.154884
365	93.408318
366	94.187431
367	92.043777
368	94.146774
369	102.28408
370	90.463051
371	88.138168
372	102.80285
373	102.83493
374	104.48993
375	96.270271
376	100.4982
377	97.734711
378	103.9345
379	101.54233
380	93.418442
381	94.789734
382	99.700623
383	105.37416
384	100.31197
385	109.15681
386	103.43024
387	106.36783
388	106.26551
389	104.56571
390	100.64877
391	96.205811
392	100.78885
393	102.03991
394	97.376793
395	94.531937
396	98.649239
397	96.711334
398	98.758919
399	98.18679
400	96.643806
401	93.542168
402	99.857483
403	95.767807
404	93.929771
405	95.558868
406	97.880547
407	100.24489
408	97.093788
409	104.30861
410	90.464119
411	97.981201
412	98.40007
413	98.550064
414	94.355087
415	93.446983
416	93.903
417	91.738525
418	97.792404
419	100.1923
420	91.276001
421	101.33035
422	105.40567
423	95.033409
424	96.546318
425	91.981155
426	101.98869
427	95.848724
428	103.6598
429	105.68053
430	109.36285
431	100.06602
432	105.39992
433	104.55893
434	104.95901
435	104.24565
436	110.09428
437	104.58439
438	106.41512
439	98.652458
440	91.363808
441	97.152954
442	96.896301
443	94.828011
444	97.020386
445	98.320152
446	103.21673
447	102.40965
448	98.301186
449	99.764999
450	99.072006
451	92.411339
452	93.432617
453	92.500839
454	97.664818
455	97.67424
456	95.65583
457	93.206291
458	97.70433
459	95.920746
460	97.012268
461	93.669388
462	93.014008
463	90.644302
464	95.093887
465	105.98408
466	94.550301
467	98.406685
468	103.02428
469	97.743889
470	103.01338
471	99.66803
472	96.620628
473	103.04606
474	98.09127
475	101.98884
476	100.56235
477	98.960075
478	103.33532
479	105.36639
480	95.373688
481	93.037552
482	94.433189
483	97.560104
484	97.28273
485	94.012207
486	91.191826
487	94.654228
488	97.942818
489	102.64725
490	102.17969
491	94.587166
492	95.626244
493	89.701736
494	101.93738
495	94.938461
496	102.43477
497	103.42092
498	106.01157
499	100.18781
500	98.996666
501	94.581474
502	94.535583
503	101.90958
504	99.848328
505	94.598045
506	98.997307
507	100.78521
508	100.52021
509	98.879158
510	102.57529
511	100.85468
512	97.760185
513	100.32671
514	98.26754
515	103.60284
516	96.235756
517	103.28683
518	95.703651
519	103.03043
520	100.49192
521	94.054901
522	96.464142
523	92.356773
524	100.73496
525	99.003929
526	102.94207
527	96.442253
528	98.481781
529	98.234192
530	93.059181
531	95.032295
532	97.821632
533	103.75899
534	94.879715
535	100.49098
536	101.5162
537	100.79378
538	100.34663
539	96.6894
540	99.14003
541	100.42661
542	97.576141
543	98.649017
544	96.174263
545	95.963089
546	100.11533
547	99.908966
548	97.804771
549	96.257011
550	96.176819
551	94.41449
552	95.121162
553	94.495338
554	97.972267
555	98.968079
556	96.402481
557	95.219177
558	105.42564
559	94.384827
560	107.87591
561	99.718216
562	97.505119
563	96.535637
564	101.21525
565	93.628433
566	97.869316
567	93.061226
568	99.309563
569	101.18352
570	102.78585
571	94.989937
572	95.480202
573	95.471359
574	99.976349
575	96.133553
576	94.932716
577	97.250946
578	97.733208
579	98.634895
580	95.692993
581	95.167679
582	97.475067
583	92.895035
584	96.169037
585	104.28999
586	99.988747
587	100.76266
588	99.642288
589	94.80117
590	96.189911
591	97.786285
592	89.413124
593	90.19976
594	92.083054
595	98.650314
596	94.158119
597	100.26128
598	91.053444
599	92.702156
600	87.877022
601	90.646454
602	98.655861
603	98.131973
604	95.65313
605	93.60788
606	96.743019
607	101.07504
608	100.24098
609	101.31316
610	102.04185
611	103.27296
612	101.59891
613	103.35534
614	104.46059
615	108.29523
616	110.80688
617	113.72272
618	112.97958
619	99.561745
620	102.07635
621	103.16278
622	106.34231
623	105.04422
624	104.86042
625	101.52294
626	108.50485
627	104.4507
628	107.37646
629	111.13694
630	106.88949
631	101.81862
632	111.15877
633	104.75853
634	111.07474
635	112.13139
636	117.49574
637	112.45369
638	101.17942
639	106.6234
640	106.7161
641	113.9231
642	107.93117
643	114.22452
644	110.80874
645	110.28989
646	120.56179
647	107.97499
648	106.23331
649	100.74081
650	106.12147
651	100.89697
652	112.20839
653	106.06421
654	102.74723
655	103.24519
656	102.97908
657	104.96942
658	107.66837
659	105.86003
660	100.71037
661	105.9169
662	105.66255
663	96.963562
664	100.92246
665	98.887688
666	105.03606
667	101.56407
668	100.51759
669	97.949509
670	102.93848
671	98.062408
672	108.37328
673	97.185951
674	101.30794
675	98.321411
676	98.800468
677	97.165848
678	101.74705
679	99.63546
680	101.09541
681	102.94506
682	100.2812
683	97.491112
684	97.746964
685	100.9524
686	108.15469
687	104.01804
688	105.42139
689	98.515793
690	100.23549
691	97.553963
692	97.283333
693	100.6715
694	95.3843
695	101.39467
696	100.07081
697	95.504898
698	97.05674
699	103.87407
700	101.92985
701	104.82677
702	102.93523
703	99.335892
704	102.5835
705	100.78017
706	100.23225
707	111.71104
708	97.919724
709	108.78546
710	102.01505
711	100.99603
712	95.204063
713	99.453423
714	103.20492
715	95.573601
716	100.53609
717	96.632317
718	95.338814
719	96.124489
720	93.097672
721	100.42092
722	100.12797
723	102.01956
724	102.1151
725	96.950249
726	96.763947
727	100.85331
728	100.08415
729	109.1878
730	106.32189
731	101.50729
732	107.80181
733	101.2265
734	107.67135
735	105.04158
736	107.26742
737	97.5681
738	96.342911
739	98.962723
740	106.38754
741	102.73562
742	103.06495
743	106.89131
744	109.46461
745	109.99145
746	109.76642
747	106.85026
748	116.05739
749	102.98693
750	103.8027
751	106.39551
752	105.75383
753	94.880516
754	101.70978
755	95.759293
756	100.74009
757	103.0322
758	107.07525
759	94.077721
760	90.496284
761	91.538307
762	91.359703
763	91.828224
764	94.340508
765	96.976768
766	96.14669
767	86.662773
768	93.569031
769	101.70892
770	95.527397
771	90.942307
772	102.38387
773	88.33107
774	90.782112
775	96.277367
776	97.645294
777	89.137787
778	89.931328
779	92.309761
780	85.938545
781	88.737457
782	97.760323
783	88.523949
784	91.465134
785	94.61908
786	93.901047
787	98.082581
788	92.070671
789	92.798912
790	93.5401
791	85.29319
792	91.391586
793	93.08239
794	88.198082
795	93.917191
796	93.002693
797	92.702614
798	93.643532
799	96.664467
800	86.016823
801	92.711617
802	92.540329
803	89.902504
804	98.369316
805	101.25075
806	102.26112
807	99.186768
808	94.994301
809	87.329536
810	89.980949
811	91.106712
812	93.893906
813	95.80101
814	92.953957
815	93.007027
816	95.678886
817	96.496941
818	98.738167
819	97.461029
820	99.021919
821	96.062752
822	93.539421
823	93.157661
824	95.795601
825	97.007065
826	96.724716
827	97.024895
828	96.325157
829	95.66375
830	97.555382
831	90.8405
832	97.237907
833	96.015213
834	95.131462
835	101.11729
836	90.639717
837	98.47641
838	99.481079
839	94.020874
840	96.219193
841	101.638
842	96.954536
843	95.995193
844	94.596703
845	99.269379
846	93.735764
847	98.828926
848	90.046921
849	91.155334
850	95.219566
851	90.555092
852	91.983757
853	95.868683
854	102.58743
855	99.047699
856	97.20446
857	89.552177
858	98.105835
859	94.441101
860	95.96257
861	97.755569
862	94.51667
863	94.530487
864	90.910713
865	93.332825
866	97.597771
867	97.516266
868	96.2006
869	95.783531
870	98.704041
871	98.22113
872	94.98204
873	91.399857
874	99.700233
875	105.33186
876	94.173706
877	100.479
878	93.869873
879	94.349098
880	99.467888
881	99.525673
882	100.34077
883	96.701195
884	93.279457
885	94.558075
886	100.59208
887	100.0966
888	101.00896
889	98.629082
890	98.115944
891	102.59512
892	111.43731
893	101.69212
894	104.32035
895	104.46936
896	99.351532
897	93.718277
898	96.961517
899	94.054848
900	92.566147
901	101.88586
902	96.67659
903	95.620049
904	93.523399
905	95.370842
906	99.549805
907	100.7701
908	98.320099
909	100.21775
910	95.181183
911	95.700348
912	97.060913
913	99.373306
914	100.40781
915	101.77304
916	104.39444
917	99.27887
918	93.144592
919	97.234138
920	101.58096
921	103.00573
922	98.437431
923	97.652672
924	97.474449
925	92.678513
926	98.992432
927	97.961555
928	104.15362
929	97.404892
930	105.38438
931	104.48862
932	96.63179
933	104.61744
934	107.88576
935	113.96666
936	112.36262
937	106.46641
938	106.12073
939	113.03635
940	104.12987
941	110.33651
942	107.67034
943	103.1508
944	102.27635
945	104.07488
946	102.20555
947	94.124153
948	96.178436
949	96.083023
950	101.42406
951	98.049088
952	95.938675
953	95.479851
954	97.739204
955	97.939392
956	92.036491
957	98.094826
958	91.607666
959	93.679382
960	93.246605
961	95.105568
962	89.424088
963	98.07019
964	96.006905
965	93.084175
966	96.921471
967	96.406174
968	89.832771
969	95.468002
970	87.190598
971	90.892921
972	93.517128
973	90.13765
974	101.31323
975	99.005814
976	88.481056
977	96.134094
978	101.85675
979	88.913658
980	93.465843
981	92.486061
982	92.127708
983	93.66613
984	95.35659
985	102.02232
986	91.721313
987	101.57013
988	90.000801
989	97.412582
990	94.73056
991	92.548546
992	93.08535
993	91.184692
994	92.716309
995	89.319267
996	94.124786
997	95.71653
998	89.101097
999	94.17231
1000	86.537102
1001	87.207603
1002	93.713623
1003	93.043999
1004	91.118576
1005	103.70467
1006	94.034065
1007	93.743752
1008	93.206833
1009	90.843239
1010	97.537941
1011	93.60228
1012	97.402885
1013	90.224213
1014	92.168114
1015	90.941795
1016	89.558327
1017	93.242149
1018	94.497528
1019	97.209427
1020	91.589798
1021	95.899925
1022	95.054482
1023	99.495354
1024	94.013557
1025	101.19733
1026	105.29202
1027	104.06984
1028	109.73376
1029	95.099007
1030	103.31613
1031	95.851746
1032	103.63388
1033	100.96237
1034	95.363014
1035	106.25861
1036	102.3503
1037	98.763039
1038	94.766083
1039	101.41041
1040	101.35133
1041	104.33697
1042	97.96904
1043	101.36041
1044	102.58729
1045	96.979256
1046	97.796883
1047	98.150047
1048	94.132385
1049	99.538887
1050	94.81929
1051	92.659782
1052	102.11507
1053	102.87289
1054	95.417191
1055	99.360947
1056	99.449944
1057	103.46369
1058	101.3917
1059	101.35274
1060	104.30336
1061	103.10598
1062	105.85089
1063	97.316147
1064	103.35622
1065	102.85639
1066	97.135796
1067	98.060196
1068	96.606316
1069	98.781311
1070	100.85653
1071	95.632416
1072	93.210205
1073	93.093605
1074	98.130005
1075	93.162582
1076	92.622658
1077	100.39535
1078	97.00222
1079	91.868774
1080	94.711418
1081	89.927116
1082	88.972565
1083	91.80394
1084	89.549072
1085	89.32296
1086	90.343979
1087	90.380814
1088	87.667435
1089	96.217918
1090	92.155762
1091	92.461365
1092	93.959816
1093	90.165276
1094	95.255043
1095	91.618797
1096	95.825478
1097	85.748482
1098	94.809601
1099	91.077698
1100	95.837189
1101	100.85263
1102	94.449112
1103	94.879333
1104	92.271164
1105	96.833351
1106	95.286331
1107	97.523201
1108	96.613609
1109	99.541573
1110	95.398903
1111	101.0754
1112	93.805717
1113	93.85144
1114	96.11628
1115	87.448746
1116	86.788254
1117	85.959282
1118	93.69146
1119	93.536278
1120	88.617683
1121	94.670685
1122	96.56105
1123	91.762611
1124	90.1493
1125	92.428062
1126	97.238701
1127	97.322891
1128	90.716377
1129	90.540535
1130	90.336914
1131	90.947296
1132	92.378311
1133	95.845741
1134	94.058578
1135	97.002876
1136	91.190437
1137	92.974609
1138	95.571075
1139	88.227333
1140	89.26757
1141	85.301025
1142	91.123955
1143	92.549377
1144	91.783936
1145	94.359512
1146	99.550438
1147	90.634521
1148	90.433945
1149	94.354538
1150	86.537872
1151	89.810425
1152	97.119881
1153	86.334915
1154	108.32919
1155	99.804543
1156	94.185745
1157	95.926239
1158	91.266792
1159	93.170975
1160	88.156181
1161	89.523293
1162	91.887596
1163	94.966156
1164	96.086792
1165	92.198891
1166	101.67735
1167	89.242455
1168	100.09167
1169	91.942223
1170	95.407677
1171	97.953827
1172	99.295067
1173	96.457512
1174	91.483521
1175	102.15023
1176	104.14346
1177	96.345871
1178	86.884567
1179	95.613029
1180	88.407127
1181	88.88623
1182	88.867241
1183	94.892387
1184	90.182899
1185	95.767776
1186	88.253586
1187	90.498741
1188	93.88237
1189	90.012794
1190	89.545204
1191	89.100113
1192	86.818542
1193	94.888069
1194	94.938019
&
