# Supplementary material for: The cooperative binding of TDP-43 to GU-rich RNA repeats antagonizes TDP-43 aggregation
Source: eLife. 2021 Sep 7;10:e67605. doi: 10.7554/eLife.67605 (PMC8523171; doi:10.7554/eLife.67605)
Supplement: Figure 5—figure supplement 3—source data 1. [file elife-67605-fig5-figsupp3-data1.xlsx]

## Sheet: Feuil1
US-SOMO: SAXS HPLC data: RRM1-2 + AUG12-(GU)6
q	I(q)	sd
0.00775366563898	1.538891e-02	2.103629e-04
0.00820976301163	1.518391e-02	1.970962e-04
0.00866586028037	1.561186e-02	1.891507e-04
0.00912195743944	1.557845e-02	1.787901e-04
0.00957805448305	1.571493e-02	1.758178e-04
0.0100341514054	1.500654e-02	1.617232e-04
0.0104902482008	1.525469e-02	1.605087e-04
0.0109463448635	1.515611e-02	1.541204e-04
0.0114024413876	1.535649e-02	1.494941e-04
0.0118585377673	1.504263e-02	1.461763e-04
0.012314633997	1.484593e-02	1.406716e-04
0.0127707300709	1.493152e-02	1.373544e-04
0.0132268259831	1.491303e-02	1.347221e-04
0.0136829217279	1.492078e-02	1.311888e-04
0.0141390172995	1.492334e-02	1.302892e-04
0.0145951126922	1.472544e-02	1.250678e-04
0.0150512079001	1.474804e-02	1.239705e-04
0.0155073029176	1.454246e-02	1.204202e-04
0.0159633977388	1.479549e-02	1.201528e-04
0.016419492358	1.438743e-02	1.158634e-04
0.0168755867694	1.433937e-02	1.148232e-04
0.0173316809672	1.420440e-02	1.141344e-04
0.0177877749456	1.418627e-02	1.095392e-04
0.0182438686989	1.411740e-02	1.102405e-04
0.0186999622213	1.404721e-02	1.071694e-04
0.019156055507	1.387493e-02	1.055133e-04
0.0196121485503	1.394816e-02	1.047790e-04
0.0200682413454	1.378538e-02	1.030596e-04
0.0205243338865	1.372143e-02	1.022868e-04
0.0209804261679	1.353958e-02	9.942645e-05
0.0214365181837	1.363463e-02	9.923991e-05
0.0218926099282	1.344938e-02	9.705381e-05
0.0223487013956	1.334865e-02	9.578004e-05
0.0228047925802	1.318851e-02	9.607605e-05
0.0232608834762	1.308283e-02	9.374054e-05
0.0237169740778	1.317815e-02	9.390236e-05
0.0241730643792	1.300099e-02	9.021063e-05
0.0246291543747	1.275858e-02	9.084947e-05
0.0250852440584	1.292728e-02	9.100504e-05
0.0255413334247	1.256261e-02	8.800287e-05
0.0259974224678	1.263750e-02	8.811421e-05
0.0264535111818	1.248354e-02	8.620784e-05
0.026909599561	1.255744e-02	8.807731e-05
0.0273656875997	1.227300e-02	8.852060e-05
0.027821775292	1.207772e-02	8.792201e-05
0.0282778626323	1.201957e-02	8.898441e-05
0.0287339496146	1.208164e-02	8.767132e-05
0.0291900362333	1.185034e-02	8.828496e-05
0.0296461224826	1.185355e-02	8.759164e-05
0.0301022083566	1.176784e-02	8.660060e-05
0.0305582938497	1.179529e-02	8.788751e-05
0.0310143789561	1.162012e-02	8.654483e-05
0.0314704636699	1.151898e-02	8.690906e-05
0.0319265479855	1.127199e-02	8.480849e-05
0.032382631897	1.117591e-02	8.541878e-05
0.0328387153987	1.104389e-02	8.458145e-05
0.0332947984848	1.092963e-02	8.417338e-05
0.0337508811495	1.087861e-02	8.504383e-05
0.0342069633871	1.080403e-02	8.251378e-05
0.0346630451918	1.075407e-02	8.367792e-05
0.0351191265578	1.054878e-02	8.212118e-05
0.0355752074793	1.052518e-02	8.241087e-05
0.0360312879506	1.041124e-02	8.230115e-05
0.036487367966	1.032599e-02	8.011367e-05
0.0369434475195	9.985114e-03	8.151914e-05
0.0373995266055	1.000224e-02	8.061799e-05
0.0378556052182	9.960854e-03	7.994851e-05
0.0383116833518	9.923654e-03	7.950568e-05
0.0387677610006	9.697344e-03	7.879729e-05
0.0392238381588	9.543875e-03	7.908055e-05
0.0396799148205	9.618997e-03	7.783724e-05
0.0401359909801	9.452022e-03	7.739721e-05
0.0405920666317	9.337829e-03	7.803873e-05
0.0410481417697	9.226402e-03	7.631776e-05
0.0415042163882	9.134541e-03	7.690419e-05
0.0419602904814	9.036223e-03	7.596850e-05
0.0424163640436	8.796305e-03	7.574282e-05
0.042872437069	8.797981e-03	7.586533e-05
0.0433285095518	8.835851e-03	7.451413e-05
0.0437845814863	8.554572e-03	7.502765e-05
0.0442406528668	8.302899e-03	7.254926e-05
0.0446967236873	8.347640e-03	7.416579e-05
0.0451527939422	8.170610e-03	7.364065e-05
0.0456088636257	8.143961e-03	7.205520e-05
0.046064932732	8.114467e-03	7.270055e-05
0.0465210012553	8.070918e-03	7.202525e-05
0.04697706919	8.004957e-03	7.222832e-05
0.0474331365301	7.788725e-03	7.109855e-05
0.0478892032699	7.830393e-03	7.086711e-05
0.0483452694038	7.719625e-03	7.110105e-05
0.0488013349258	7.473657e-03	7.013292e-05
0.0492573998302	7.307251e-03	7.026878e-05
0.0497134641113	7.361489e-03	6.885287e-05
0.0501695277633	7.220100e-03	6.892110e-05
0.0506255907804	7.151432e-03	6.942887e-05
0.0510816531568	7.049697e-03	6.831150e-05
0.0515377148869	6.913031e-03	6.804159e-05
0.0519937759647	6.811421e-03	6.693382e-05
0.0524498363845	6.794706e-03	6.798052e-05
0.0529058961406	6.653726e-03	6.718908e-05
0.0533619552272	6.673388e-03	6.669121e-05
0.0538180136386	6.510066e-03	6.627374e-05
0.0542740713689	6.403232e-03	6.607602e-05
0.0547301284123	6.297850e-03	6.643663e-05
0.0551861847632	6.253184e-03	6.469104e-05
0.0556422404158	6.225312e-03	6.503253e-05
0.0560982953642	6.168053e-03	6.533707e-05
0.0565543496027	6.015788e-03	6.488534e-05
0.0570104031256	5.928814e-03	6.425212e-05
0.057466455927	5.881872e-03	6.371165e-05
0.0579225080012	5.753934e-03	6.362940e-05
0.0583785593425	5.605448e-03	6.329197e-05
0.058834609945	5.688117e-03	6.324934e-05
0.059290659803	5.498778e-03	6.290351e-05
0.0597467089107	5.463111e-03	6.203864e-05
0.0602027572624	5.366060e-03	6.263685e-05
0.0606588048523	5.304483e-03	6.202828e-05
0.0611148516746	5.262655e-03	6.150961e-05
0.0615708977235	5.207614e-03	6.128310e-05
0.0620269429933	5.173344e-03	6.105907e-05
0.0624829874783	5.128340e-03	6.160381e-05
0.0629390311725	4.943526e-03	6.025974e-05
0.0633950740704	4.937685e-03	6.026368e-05
0.063851116166	4.850935e-03	5.991071e-05
0.0643071574537	4.849957e-03	6.028452e-05
0.0647631979277	4.611082e-03	5.958746e-05
0.0652192375821	4.761823e-03	5.944105e-05
0.0656752764113	4.622376e-03	5.931890e-05
0.0661313144095	4.450637e-03	5.869176e-05
0.0665873515708	4.533655e-03	5.870962e-05
0.0670433878896	4.441090e-03	5.823667e-05
0.06749942336	4.396827e-03	5.802781e-05
0.0679554579763	4.385078e-03	5.887862e-05
0.0684114917328	4.368908e-03	5.765881e-05
0.0688675246236	4.151428e-03	5.753768e-05
0.0693235566429	4.129580e-03	5.681270e-05
0.0697795877851	4.089909e-03	5.697655e-05
0.0702356180444	4.022130e-03	5.773432e-05
0.0706916474149	3.959815e-03	5.609760e-05
0.071147675891	3.910262e-03	5.673989e-05
0.0716037034668	3.831725e-03	5.620471e-05
0.0720597301366	3.743660e-03	5.581187e-05
0.0725157558946	3.807524e-03	5.595661e-05
0.072971780735	3.638826e-03	5.517923e-05
0.0734278046521	3.661876e-03	5.566187e-05
0.0738838276402	3.565665e-03	5.518614e-05
0.0743398496934	3.476977e-03	5.508002e-05
0.0747958708059	3.588074e-03	5.485507e-05
0.0752518909721	3.371741e-03	5.409097e-05
0.0757079101861	3.562755e-03	5.509141e-05
0.0761639284422	3.356437e-03	5.433604e-05
0.0766199457346	3.368926e-03	5.411654e-05
0.0770759620576	3.270513e-03	5.355276e-05
0.0775319774053	3.277133e-03	5.352234e-05
0.0779879917721	3.244176e-03	5.357203e-05
0.078444005152	3.167814e-03	5.321652e-05
0.0789000175395	3.128548e-03	5.336551e-05
0.0793560289287	3.047831e-03	5.314215e-05
0.0798120393138	3.091738e-03	5.282010e-05
0.0802680486891	2.994152e-03	5.260078e-05
0.0807240570488	2.860728e-03	5.213381e-05
0.0811800643872	2.926052e-03	5.266015e-05
0.0816360706985	2.853945e-03	5.199808e-05
0.0820920759768	2.890999e-03	5.223334e-05
0.0825480802165	2.844141e-03	5.169364e-05
0.0830040834118	2.811359e-03	5.140310e-05
0.083460085557	2.777087e-03	5.168027e-05
0.0839160866461	2.701185e-03	5.114662e-05
0.0843720866736	2.641454e-03	5.125849e-05
0.0848280856336	2.736359e-03	5.074465e-05
0.0852840835203	2.694155e-03	5.104116e-05
0.085740080328	2.486635e-03	5.074133e-05
0.086196076051	2.585314e-03	5.011156e-05
0.0866520706834	2.530049e-03	5.057258e-05
0.0871080642195	2.488285e-03	4.993612e-05
0.0875640566536	2.495444e-03	5.034572e-05
0.0880200479798	2.473133e-03	5.000724e-05
0.0884760381924	2.457870e-03	4.929297e-05
0.0889320272857	2.436248e-03	4.977345e-05
0.0893880152538	2.348076e-03	4.924581e-05
0.0898440020911	2.286111e-03	4.944139e-05
0.0902999877916	2.324042e-03	5.007750e-05
0.0907559723498	2.372702e-03	5.037225e-05
0.0912119557598	2.325891e-03	5.145850e-05
0.0916679380158	2.290330e-03	5.134596e-05
0.0921239191121	2.231234e-03	5.180031e-05
0.092579899043	2.197434e-03	5.150290e-05
0.0930358778026	2.122940e-03	5.206398e-05
0.0934918553851	2.120336e-03	5.240196e-05
0.093947831785	2.123592e-03	5.198413e-05
0.0944038069963	2.088558e-03	5.275000e-05
0.0948597810133	2.037356e-03	5.212926e-05
0.0953157538302	2.050052e-03	5.266999e-05
0.0957717254413	2.056388e-03	5.280460e-05
0.0962276958408	1.978049e-03	5.248848e-05
0.096683665023	1.944126e-03	5.305641e-05
0.0971396329821	1.944078e-03	5.279190e-05
0.0975955997123	1.938557e-03	5.328014e-05
0.0980515652078	1.896440e-03	5.318039e-05
0.098507529463	1.912664e-03	5.270472e-05
0.0989634924719	1.937382e-03	5.246237e-05
0.099419454229	1.827954e-03	5.092620e-05
0.0998754147284	1.770252e-03	5.093724e-05
0.100331373964	1.781450e-03	4.980003e-05
0.100787331931	1.832250e-03	5.031309e-05
0.101243288623	1.708485e-03	4.944042e-05
0.101699244034	1.710912e-03	4.909213e-05
0.102155198158	1.748061e-03	4.908860e-05
0.10261115099	1.655754e-03	4.870733e-05
0.103067102525	1.613207e-03	4.824137e-05
0.103523052755	1.747855e-03	4.842391e-05
0.103979001676	1.632122e-03	4.786374e-05
0.104434949281	1.678440e-03	4.790359e-05
0.104890895566	1.572278e-03	4.765247e-05
0.105346840523	1.582844e-03	4.750272e-05
0.105802784149	1.543464e-03	4.686454e-05
0.106258726435	1.487093e-03	4.712791e-05
0.106714667378	1.490068e-03	4.694788e-05
0.10717060697	1.460476e-03	4.677301e-05
0.107626545208	1.499964e-03	4.668131e-05
0.108082482083	1.493135e-03	4.751349e-05
0.108538417592	1.480805e-03	4.834253e-05
0.108994351727	1.439433e-03	4.824368e-05
0.109450284484	1.368097e-03	4.881161e-05
0.109906215857	1.412572e-03	4.857317e-05
0.110362145839	1.450992e-03	4.787304e-05
0.110818074425	1.343859e-03	4.744378e-05
0.11127400161	1.276832e-03	4.639949e-05
0.111729927387	1.286515e-03	4.638283e-05
0.11218585175	1.375549e-03	4.603227e-05
0.112641774695	1.358302e-03	4.587862e-05
0.113097696215	1.313886e-03	4.566723e-05
0.113553616305	1.205627e-03	4.495159e-05
0.114009534958	1.231212e-03	4.514919e-05
0.114465452169	1.266734e-03	4.502451e-05
0.114921367933	1.255775e-03	4.465124e-05
0.115377282242	1.188913e-03	4.489346e-05
0.115833195093	1.178024e-03	4.405100e-05
0.116289106478	1.180805e-03	4.497675e-05
0.116745016393	1.218230e-03	4.413373e-05
0.117200924831	1.187659e-03	4.394291e-05
0.117656831787	1.151840e-03	4.400869e-05
0.118112737254	1.086857e-03	4.364509e-05
0.118568641228	1.118898e-03	4.411022e-05
0.119024543702	1.148815e-03	4.353290e-05
0.11948044467	1.034310e-03	4.340070e-05
0.119936344128	1.044403e-03	4.348158e-05
0.120392242068	1.084850e-03	4.317257e-05
0.120848138486	1.007676e-03	4.342815e-05
0.121304033376	1.065053e-03	4.280576e-05
0.121759926731	1.041989e-03	4.300405e-05
0.122215818546	1.035808e-03	4.308839e-05
0.122671708816	1.073382e-03	4.251489e-05
0.123127597534	1.030762e-03	4.265222e-05
0.123583484695	1.059111e-03	4.251710e-05
0.124039370293	9.726063e-04	4.262018e-05
0.124495254323	9.140757e-04	4.229682e-05
0.124951136777	9.460094e-04	4.221499e-05
0.125407017652	9.747702e-04	4.203115e-05
0.125862896941	9.354949e-04	4.208118e-05
0.126318774637	8.969158e-04	4.210553e-05
0.126774650737	9.345548e-04	4.179524e-05
0.127230525233	8.578661e-04	4.206684e-05
0.12768639812	8.621791e-04	4.295519e-05
0.128142269392	8.986445e-04	4.331387e-05
0.128598139044	8.732827e-04	4.339974e-05
0.129054007069	8.590027e-04	4.354372e-05
0.129509873463	8.505081e-04	4.386751e-05
0.129965738218	8.147218e-04	4.431926e-05
0.13042160133	7.599330e-04	4.419861e-05
0.130877462793	8.312226e-04	4.407467e-05
0.131333322601	7.424165e-04	4.389283e-05
0.131789180747	8.783431e-04	4.432420e-05
0.132245037228	7.019068e-04	4.419658e-05
0.132700892036	8.436725e-04	4.402675e-05
0.133156745165	6.936424e-04	4.410276e-05
0.133612596611	7.696081e-04	4.399374e-05
0.134068446368	8.295923e-04	4.418607e-05
0.134524294429	7.784832e-04	4.409788e-05
0.134980140789	7.080035e-04	4.395584e-05
0.135435985442	7.025791e-04	4.413586e-05
0.135891828382	6.290516e-04	4.403297e-05
0.136347669604	6.875236e-04	4.383897e-05
0.136803509102	6.413559e-04	4.389717e-05
0.13725934687	6.141327e-04	4.387626e-05
0.137715182903	7.284315e-04	4.422340e-05
0.138171017194	6.863441e-04	4.374176e-05
0.138626849738	7.036655e-04	4.392284e-05
0.139082680529	6.450238e-04	4.384600e-05
0.139538509561	6.362028e-04	4.397914e-05
0.139994336829	6.041355e-04	4.359917e-05
0.140450162327	6.988925e-04	4.385861e-05
0.140905986049	6.652436e-04	4.358253e-05
0.14136180799	6.239617e-04	4.380013e-05
0.141817628142	6.262983e-04	4.363997e-05
0.142273446502	6.076664e-04	4.307933e-05
0.142729263063	5.794978e-04	4.352699e-05
0.143185077819	6.093525e-04	4.339953e-05
0.143640890765	5.466018e-04	4.345939e-05
0.144096701894	6.229275e-04	4.338368e-05
0.144552511202	5.426587e-04	4.299726e-05
0.145008318682	5.582061e-04	4.345602e-05
0.145464124329	4.944136e-04	4.304020e-05
0.145919928136	5.898929e-04	4.336842e-05
0.146375730099	5.422070e-04	4.332314e-05
0.14683153021	5.680486e-04	4.304859e-05
0.147287328466	5.871453e-04	4.348096e-05
0.147743124859	5.287798e-04	4.294046e-05
0.148198919384	4.788112e-04	4.334182e-05
0.148654712036	5.197372e-04	4.316083e-05
0.149110502808	4.143823e-04	4.306588e-05
0.149566291695	5.255350e-04	4.319816e-05
0.150022078691	4.416549e-04	4.296148e-05
0.15047786379	4.879939e-04	4.308086e-05
0.150933646987	4.881683e-04	4.297341e-05
0.151389428276	4.356254e-04	4.288065e-05
0.151845207651	5.178270e-04	4.297232e-05
0.152300985106	4.278979e-04	4.275435e-05
0.152756760636	4.246183e-04	4.303478e-05
0.153212534234	4.100872e-04	4.269738e-05
0.153668305896	4.539323e-04	4.280596e-05
0.154124075615	3.692055e-04	4.268393e-05
0.154579843386	4.504853e-04	4.272575e-05
0.155035609202	4.877567e-04	4.277085e-05
0.155491373058	4.182099e-04	4.243560e-05
0.155947134949	3.598339e-04	4.265663e-05
0.156402894869	4.011342e-04	4.215209e-05
0.156858652811	4.929771e-04	4.272839e-05
0.15731440877	4.440817e-04	4.246021e-05
0.157770162741	4.277322e-04	4.227157e-05
0.158225914717	4.127626e-04	4.234059e-05
0.158681664693	5.124120e-04	4.193543e-05
0.159137412663	4.018185e-04	4.218625e-05
0.159593158622	3.160491e-04	4.182138e-05
0.160048902563	3.668973e-04	4.161586e-05
0.160504644481	3.840860e-04	4.197500e-05
0.16096038437	3.908312e-04	4.159648e-05
0.161416122224	3.628213e-04	4.179061e-05
0.161871858038	4.030801e-04	4.148138e-05
0.162327591806	2.821285e-04	4.135796e-05
0.162783323523	3.113966e-04	4.184097e-05
0.163239053181	3.374025e-04	4.125048e-05
0.163694780776	2.365562e-04	4.149652e-05
0.164150506302	3.122254e-04	4.128566e-05
0.164606229753	2.557989e-04	4.143005e-05
0.165061951124	2.872766e-04	4.137116e-05
0.165517670408	2.497688e-04	4.125813e-05
0.1659733876	3.395534e-04	4.132859e-05
0.166429102694	2.848075e-04	4.109943e-05
0.166884815685	3.050252e-04	4.139637e-05
0.167340526566	2.867986e-04	4.111077e-05
0.167796235333	2.935637e-04	4.088152e-05
0.168251941978	2.937474e-04	4.133841e-05
0.168707646497	3.828840e-04	4.126824e-05
0.169163348884	2.316433e-04	4.104463e-05
0.169619049132	3.262254e-04	4.089393e-05
0.170074747237	1.915544e-04	4.081306e-05
0.170530443192	2.785116e-04	4.114193e-05
0.170986136992	3.042635e-04	4.075472e-05
0.171441828631	2.172895e-04	4.120124e-05
0.171897518103	2.203748e-04	4.038719e-05
0.172353205403	2.434776e-04	4.111757e-05
0.172808890524	2.677757e-04	4.069530e-05
0.173264573462	2.137613e-04	4.064292e-05
0.173720254209	2.363510e-04	4.069419e-05
0.174175932761	2.484838e-04	4.053481e-05
0.174631609112	2.823723e-04	4.099834e-05
0.175087283256	2.088472e-04	4.046245e-05
0.175542955188	2.931685e-04	4.060012e-05
0.175998624901	2.426829e-04	4.057877e-05
0.176454292389	2.654066e-04	4.048297e-05
0.176909957648	2.563297e-04	4.069841e-05
0.177365620671	2.537488e-04	4.020932e-05
0.177821281453	2.003518e-04	4.049688e-05
0.178276939987	2.252426e-04	4.043196e-05
0.178732596269	2.853005e-04	4.015062e-05
0.179188250292	2.534590e-04	4.062740e-05
0.179643902051	2.439941e-04	4.018216e-05
0.180099551539	3.093279e-04	4.059271e-05
0.180555198752	1.125864e-04	4.024053e-05
0.181010843683	1.946753e-04	3.985198e-05
0.181466486327	2.780572e-04	4.041921e-05
0.181922126677	2.419152e-04	4.001110e-05
0.182377764729	2.511894e-04	4.029388e-05
0.182833400477	1.964042e-04	4.018997e-05
0.183289033914	2.396906e-04	3.980650e-05
0.183744665035	2.326461e-04	4.044412e-05
0.184200293834	1.758523e-04	3.966400e-05
0.184655920306	1.469473e-04	3.996704e-05
0.185111544444	1.688655e-04	3.985838e-05
0.185567166244	1.805410e-04	3.985621e-05
0.186022785699	1.351611e-04	4.008465e-05
0.186478402803	2.045711e-04	3.967121e-05
0.186934017551	1.829974e-04	3.981288e-05
0.187389629937	1.788693e-04	3.971100e-05
0.187845239956	1.825519e-04	3.972330e-05
0.188300847601	2.054457e-04	3.984637e-05
0.188756452867	1.954970e-04	3.958491e-05
0.189212055748	1.358750e-04	3.964420e-05
0.189667656239	1.607199e-04	3.946060e-05
0.190123254333	2.001725e-04	3.973719e-05
0.190578850025	2.115820e-04	3.958597e-05
0.191034443309	2.185981e-04	3.959772e-05
0.19149003418	2.234879e-04	3.976226e-05
0.191945622631	1.853690e-04	3.929295e-05
0.192401208658	1.640698e-04	3.944568e-05
0.192856792253	1.523707e-04	3.927032e-05
0.193312373412	1.821616e-04	3.943572e-05
0.193767952129	1.613853e-04	3.955555e-05
0.194223528398	1.453723e-04	3.898035e-05
0.194679102213	1.391269e-04	3.940528e-05
0.195134673569	1.340535e-04	3.930513e-05
0.19559024246	1.638749e-04	3.914948e-05
0.196045808879	1.444771e-04	3.916005e-05
0.196501372822	1.728002e-04	3.918870e-05
0.196956934283	1.751236e-04	3.931280e-05
0.197412493255	1.787408e-04	3.915339e-05
0.197868049734	1.549665e-04	3.914038e-05
0.198323603713	1.309993e-04	3.894671e-05
0.198779155187	1.612777e-04	3.880100e-05
0.19923470415	9.368848e-05	3.915114e-05
0.199690250596	9.551855e-05	3.896257e-05
0.200145794519	1.082114e-04	3.886269e-05
0.200601335914	1.192672e-04	3.876969e-05
0.201056874776	1.940815e-04	3.887534e-05
0.201512411097	1.554352e-04	3.895024e-05
0.201967944873	1.361973e-04	3.879555e-05
0.202423476098	2.117073e-04	3.890370e-05
0.202879004766	2.080699e-04	3.878609e-05
0.203334530872	9.964197e-05	3.888876e-05
0.203790054409	6.910291e-05	3.859281e-05
0.204245575372	1.805337e-04	3.872312e-05
0.204701093755	1.719557e-04	3.869967e-05
0.205156609552	1.946032e-04	3.860501e-05
0.205612122759	1.231475e-04	3.882594e-05
0.206067633368	1.352106e-04	3.838708e-05
0.206523141374	1.791903e-04	3.857163e-05
0.206978646773	1.512659e-04	3.861827e-05
0.207434149556	6.430458e-05	3.830368e-05
0.20788964972	4.753411e-05	3.854257e-05
0.208345147259	8.833480e-05	3.816840e-05
0.208800642165	1.115008e-04	3.862301e-05
0.209256134435	6.855242e-05	3.825715e-05
0.209711624062	1.612455e-04	3.829509e-05
0.21016711104	1.234359e-04	3.846581e-05
0.210622595364	1.231440e-04	3.805589e-05
0.211078077028	1.319120e-04	3.843293e-05
0.211533556027	1.653706e-04	3.830368e-05
0.211989032353	8.125853e-05	3.813789e-05
0.212444506003	8.282539e-05	3.821756e-05
0.212899976969	3.401136e-05	3.793454e-05
0.213355445247	9.702721e-05	3.842678e-05
0.213810910831	8.506736e-05	3.811956e-05
0.214266373714	1.625565e-04	3.806492e-05
0.214721833892	1.094672e-04	3.819232e-05
0.215177291358	6.235024e-05	3.785771e-05
0.215632746106	1.123724e-04	3.804507e-05
0.216088198132	8.234697e-05	3.855270e-05
0.216543647429	4.176768e-05	3.941840e-05
0.216999093991	-7.612252e-06	3.967615e-05
0.217454537813	1.385098e-04	4.002906e-05
0.21790997889	1.085417e-05	4.010336e-05
0.218365417214	5.540047e-05	4.064810e-05
0.218820852781	9.728129e-05	4.101677e-05
0.219276285586	1.487606e-04	4.107238e-05
0.219731715621	1.281923e-04	4.135661e-05
0.220187142882	1.159862e-04	4.162432e-05
0.220642567362	8.284589e-05	4.166995e-05
0.221097989056	4.359106e-05	4.201971e-05
0.221553407959	6.715874e-05	4.187075e-05
0.222008824064	8.964292e-05	4.234134e-05
0.222464237367	8.901635e-05	4.245758e-05
0.22291964786	1.258418e-05	4.263325e-05
0.223375055538	7.689014e-05	4.296743e-05
0.223830460397	5.762064e-05	4.247932e-05
0.224285862429	1.435757e-04	4.350167e-05
0.224741261629	7.329604e-05	4.224848e-05
0.225196657992	1.949596e-04	4.167787e-05
0.225652051512	2.067567e-05	4.141477e-05
0.226107442183	6.794625e-05	4.063249e-05
0.226562829999	1.247453e-04	4.084927e-05
0.227018214954	1.231756e-04	4.039161e-05
0.227473597044	1.123798e-04	4.046276e-05
0.227928976262	9.831715e-05	4.033421e-05
0.228384352602	1.153732e-04	4.011205e-05
0.228839726059	1.176207e-04	3.993081e-05
0.229295096627	-4.339699e-06	3.950752e-05
0.2297504643	1.050944e-06	3.963816e-05
0.230205829073	4.522029e-05	3.972401e-05
0.230661190939	7.595386e-05	3.946173e-05
0.231116549894	2.084872e-04	3.974039e-05
0.231571905931	9.130435e-05	3.913260e-05
0.232027259045	1.324985e-04	3.946137e-05
0.23248260923	8.009640e-05	3.914482e-05
0.23293795648	1.094228e-04	3.918262e-05
0.23339330079	4.720299e-05	3.898125e-05
0.233848642153	7.206322e-05	3.900034e-05
0.234303980565	8.579942e-05	3.913280e-05
0.234759316019	1.005845e-05	3.852023e-05
0.235214648509	6.184540e-05	3.891262e-05
0.235669978031	3.252883e-05	3.885842e-05
0.236125304578	1.104254e-04	3.874802e-05
0.236580628144	1.159528e-04	3.869698e-05
0.237035948724	2.226721e-05	3.833375e-05
0.237491266312	9.460139e-05	3.851975e-05
0.237946580903	9.721512e-05	3.851980e-05
0.23840189249	4.573993e-06	3.847457e-05
0.238857201068	1.249386e-04	3.851242e-05
0.239312506632	9.260278e-05	3.810180e-05
0.239767809175	7.266913e-05	3.850396e-05
0.240223108691	1.912507e-05	3.792524e-05
0.240678405176	8.590755e-05	3.827520e-05
0.241133698623	2.751529e-05	3.821708e-05
0.241588989027	3.533999e-05	3.800063e-05
0.242044276382	5.735697e-05	3.809505e-05
0.242499560681	1.180075e-05	3.772482e-05
0.242954841921	3.234139e-05	3.794473e-05
0.243410120094	1.753583e-06	3.761091e-05
0.243865395195	1.367966e-05	3.779883e-05
0.244320667219	7.532084e-06	3.774444e-05
0.244775936159	9.334334e-05	3.754777e-05
0.245231202011	6.917002e-06	3.778577e-05
0.245686464767	5.660897e-05	3.751724e-05
0.246141724423	4.020892e-05	3.746425e-05
0.246596980973	1.118941e-04	3.762894e-05
0.247052234411	4.433415e-05	3.761335e-05
0.247507484731	5.289058e-05	3.759554e-05
0.247962731928	-4.248535e-06	3.719153e-05
0.248417975996	1.144998e-04	3.742435e-05
0.248873216929	2.304480e-05	3.725019e-05
0.249328454722	6.549258e-05	3.748609e-05
0.249783689369	1.040196e-04	3.748057e-05
0.250238920863	9.816389e-05	3.731334e-05
0.2506941492	1.517392e-04	3.737368e-05
0.251149374374	2.683835e-05	3.712960e-05
0.251604596379	3.148150e-05	3.723684e-05
0.252059815209	6.455001e-05	3.697858e-05
0.252515030859	4.222157e-05	3.687711e-05
0.252970243322	6.253812e-05	3.707277e-05
0.253425452594	5.273662e-05	3.688574e-05
0.253880658668	7.363871e-06	3.684391e-05
0.254335861539	8.598631e-05	3.671411e-05
0.254791061201	1.323438e-04	3.655881e-05
0.255246257648	1.920114e-05	3.676905e-05
0.255701450875	7.898063e-05	3.648305e-05
0.256156640876	1.418412e-05	3.653076e-05
0.256611827645	2.761142e-05	3.616599e-05
0.257067011176	9.466610e-05	3.643778e-05
0.257522191464	7.699201e-05	3.653200e-05
0.257977368504	3.999126e-05	3.592874e-05
0.258432542288	8.317898e-05	3.646622e-05
0.258887712813	4.067930e-05	3.593327e-05
0.259342880071	-7.754550e-06	3.628796e-05
0.259798044058	1.013608e-05	3.595125e-05
0.260253204767	8.961816e-05	3.594730e-05
0.260708362193	1.746944e-05	3.617882e-05
0.26116351633	2.024942e-06	3.594423e-05
0.261618667173	2.420719e-05	3.596898e-05
0.262073814715	8.689511e-05	3.595014e-05
0.262528958952	-5.627945e-05	3.586464e-05
0.262984099877	1.073786e-04	3.610737e-05
0.263439237484	3.016991e-05	3.568152e-05
0.263894371768	1.506147e-04	3.610429e-05
0.264349502724	-1.279484e-06	3.567953e-05
0.264804630345	1.460169e-04	3.597812e-05
0.265259754626	4.108356e-05	3.591605e-05
0.265714875561	2.211712e-05	3.553941e-05
0.266169993144	9.318679e-06	3.568500e-05
0.266625107371	2.672886e-05	3.561087e-05
0.267080218234	1.801230e-05	3.586958e-05
0.267535325728	8.408576e-05	3.555576e-05
0.267990429848	5.810780e-05	3.569706e-05
0.268445530588	7.627938e-05	3.574457e-05
0.268900627943	1.032452e-04	3.562298e-05
0.269355721905	-1.465430e-05	3.546810e-05
0.269810812471	7.703545e-05	3.562303e-05
0.270265899634	-2.057395e-05	3.539734e-05
0.270720983388	9.063585e-05	3.577676e-05
0.271176063727	6.965688e-05	3.520769e-05
0.271631140647	3.662070e-05	3.551912e-05
0.272086214141	8.147811e-05	3.531998e-05
0.272541284204	2.087503e-05	3.552570e-05
0.27299635083	7.241400e-05	3.552963e-05
0.273451414013	3.089864e-05	3.518318e-05
0.273906473747	5.577771e-05	3.537589e-05
0.274361530028	1.096089e-04	3.526397e-05
0.274816582848	7.474928e-05	3.538459e-05
0.275271632203	1.215047e-04	3.533414e-05
0.275726678086	4.940023e-05	3.517945e-05
0.276181720493	4.472242e-05	3.546037e-05
0.276636759417	7.764640e-05	3.508769e-05
0.277091794853	2.318955e-05	3.503154e-05
0.277546826794	3.620231e-05	3.521946e-05
0.278001855236	3.328706e-05	3.502076e-05
0.278456880172	7.782870e-05	3.534150e-05
0.278911901598	1.244166e-05	3.498709e-05
0.279366919506	3.990924e-05	3.520988e-05
0.279821933892	4.420963e-05	3.482285e-05
0.28027694475	3.434376e-05	3.509022e-05
0.280731952073	6.450695e-05	3.490019e-05
0.281186955858	4.111459e-05	3.501143e-05
0.281641956097	-3.682909e-05	3.493411e-05
0.282096952784	5.119729e-05	3.483180e-05
0.282551945916	1.168367e-04	3.501398e-05
0.283006935485	1.230024e-05	3.470127e-05
0.283461921485	7.748087e-05	3.503083e-05
0.283916903912	2.791957e-05	3.494054e-05
0.28437188276	1.507737e-05	3.468855e-05
0.284826858022	1.047043e-05	3.484458e-05
0.285281829694	9.602792e-05	3.462612e-05
0.285736797769	3.955270e-05	3.476031e-05
0.286191762242	6.598148e-05	3.479515e-05
0.286646723107	7.187132e-05	3.474627e-05
0.287101680359	2.430973e-05	3.485038e-05
0.287556633991	4.404927e-05	3.448984e-05
0.288011583998	2.488541e-05	3.462049e-05
0.288466530374	4.433153e-05	3.455824e-05
0.288921473114	-2.354319e-05	3.457554e-05
0.289376412212	8.355283e-06	3.474298e-05
0.289831347663	1.624129e-05	3.436177e-05
0.29028627946	3.133869e-05	3.465929e-05
0.290741207598	1.522482e-05	3.438103e-05
0.291196132071	4.450919e-05	3.451716e-05
0.291651052873	3.851104e-05	3.455951e-05
0.29210597	2.880057e-05	3.440293e-05
0.292560883444	-5.109330e-06	3.444966e-05
0.293015793201	-2.300516e-05	3.428364e-05
0.293470699265	5.040536e-05	3.440344e-05
0.29392560163	-2.936772e-05	3.438162e-05
0.29438050029	4.169119e-05	3.429384e-05
0.29483539524	1.235906e-05	3.456038e-05
0.295290286474	1.665388e-05	3.402454e-05
0.295745173986	4.355228e-05	3.433320e-05
0.296200057771	2.268545e-05	3.409804e-05
0.296654937823	4.497709e-05	3.432258e-05
0.297109814137	2.781572e-05	3.425959e-05
0.297564686706	8.828927e-05	3.411427e-05
0.298019555524	2.031917e-06	3.424068e-05
0.298474420587	5.666586e-05	3.402202e-05
0.298929281889	9.606825e-05	3.425230e-05
0.299384139423	9.511004e-05	3.404051e-05
0.299838993185	1.102553e-04	3.419124e-05
0.300293843168	2.702052e-05	3.412616e-05
0.300748689367	4.674523e-05	3.397473e-05
0.301203531776	1.169241e-05	3.410430e-05
0.30165837039	5.077524e-05	3.399171e-05
0.302113205202	1.296495e-05	3.389176e-05
0.302568036208	4.463676e-05	3.413844e-05
0.303022863401	2.756711e-05	3.375901e-05
0.303477686775	6.270310e-06	3.402643e-05
0.303932506326	6.178377e-05	3.375919e-05
0.304387322047	2.758361e-05	3.392313e-05
0.304842133933	4.109309e-05	3.387094e-05
0.305296941978	2.073895e-05	3.389108e-05
0.305751746176	3.243835e-05	3.390248e-05
0.306206546521	7.456022e-05	3.384067e-05
0.306661343009	5.464778e-05	3.377780e-05
0.307116135633	8.093144e-05	3.382358e-05
0.307570924388	6.796075e-05	3.368282e-05
0.308025709268	-7.976666e-06	3.377082e-05
0.308480490266	9.623174e-05	3.372846e-05
0.308935267379	8.268080e-05	3.373163e-05
0.309390040599	5.629998e-05	3.378704e-05
0.309844809922	5.203792e-05	3.360943e-05
0.310299575341	4.357845e-05	3.361876e-05
0.310754336851	-1.549444e-05	3.347499e-05
0.311209094447	8.938308e-05	3.371297e-05
0.311663848121	2.191654e-05	3.357148e-05
0.31211859787	1.756373e-05	3.356525e-05
0.312573343687	8.014672e-05	3.355778e-05
0.313028085566	4.086731e-05	3.364512e-05
0.313482823503	3.777930e-05	3.346462e-05
0.31393755749	6.087153e-05	3.343019e-05
0.314392287523	3.612973e-05	3.354931e-05
0.314847013596	8.945251e-06	3.338414e-05
0.315301735702	5.013977e-05	3.343621e-05
0.315756453838	5.721798e-05	3.350304e-05
0.316211167996	4.248698e-05	3.328248e-05
0.316665878171	7.472793e-05	3.348958e-05
0.317120584358	2.628940e-05	3.328027e-05
0.31757528655	5.334393e-05	3.337048e-05
0.318029984743	-1.293093e-05	3.324731e-05
0.31848467893	1.254269e-05	3.328804e-05
0.318939369105	2.413890e-05	3.332299e-05
0.319394055264	6.250776e-05	3.311725e-05
0.3198487374	6.521295e-05	3.336267e-05
0.320303415508	5.880199e-05	3.328969e-05
0.320758089583	6.606308e-05	3.315695e-05
0.321212759617	-3.367291e-06	3.325934e-05
0.321667425606	-2.502388e-06	3.300339e-05
0.322122087545	3.684741e-05	3.312391e-05
0.322576745426	4.900202e-05	3.315031e-05
0.323031399246	4.537782e-05	3.315653e-05
0.323486048997	7.029520e-05	3.318629e-05
0.323940694675	8.170347e-05	3.305347e-05
0.324395336274	1.357621e-04	3.327074e-05
0.324849973788	2.585678e-05	3.283125e-05
0.325304607211	6.821656e-05	3.311767e-05
0.325759236538	-1.357202e-05	3.289761e-05
0.326213861763	5.775645e-05	3.296998e-05
0.32666848288	2.112572e-05	3.314696e-05
0.327123099884	5.019981e-05	3.282265e-05
0.32757771277	8.312942e-05	3.305409e-05
0.32803232153	-1.484076e-05	3.278278e-05
0.328486926161	1.438211e-05	3.289691e-05
0.328941526655	-2.179931e-05	3.295642e-05
0.329396123008	6.079906e-05	3.282064e-05
0.329850715213	2.890797e-05	3.290080e-05
0.330305303266	5.623452e-05	3.271759e-05
0.33075988716	9.972340e-05	3.287929e-05
0.33121446689	6.155371e-05	3.282334e-05
0.33166904245	-6.142252e-06	3.278207e-05
0.332123613834	2.932668e-06	3.286374e-05
0.332578181037	7.026501e-05	3.264350e-05
0.333032744054	6.602295e-05	3.283039e-05
0.333487302877	-2.447081e-05	3.251665e-05
0.333941857503	4.894113e-05	3.280116e-05
0.334396407925	7.238684e-05	3.285901e-05
0.334850954137	3.974489e-05	3.245607e-05
0.335305496134	4.276558e-05	3.285594e-05
0.33576003391	4.698021e-05	3.255671e-05
0.336214567459	1.116673e-04	3.263985e-05
0.336669096776	8.317643e-05	3.261272e-05
0.337123621856	8.725025e-05	3.271986e-05
0.337578142692	1.182684e-05	3.250837e-05
0.338032659279	4.414006e-05	3.255977e-05
0.338487171611	3.385144e-05	3.255497e-05
0.338941679683	2.366782e-05	3.246453e-05
0.339396183488	9.123889e-06	3.246708e-05
0.339850683022	2.277504e-05	3.253012e-05
0.340305178278	-2.532384e-05	3.234693e-05
0.340759669251	5.537362e-05	3.262046e-05
0.341214155936	3.807576e-05	3.283589e-05
0.341668638326	5.843704e-05	3.343149e-05
0.342123116416	3.992240e-05	3.399856e-05
0.3425775902	4.970839e-05	3.401281e-05
0.343032059673	3.322952e-05	3.447978e-05
0.343486524829	1.024721e-04	3.441539e-05
0.343940985662	7.583242e-06	3.477684e-05
0.344395442167	3.269484e-05	3.535206e-05
0.344849894337	2.159396e-05	3.631286e-05
0.345304342169	7.753749e-05	3.728084e-05
0.345758785654	2.190220e-06	3.719126e-05
0.346213224789	2.934481e-05	3.796729e-05
0.346667659568	8.937908e-05	3.806342e-05
0.347122089984	2.223960e-05	3.812322e-05
0.347576516032	7.262068e-05	3.897337e-05
0.348030937707	2.850938e-05	3.876778e-05
0.348485355002	1.993592e-05	3.956278e-05
0.348939767913	4.299406e-05	3.934120e-05
0.349394176433	7.565594e-05	3.991646e-05
0.349848580557	1.055612e-04	3.935933e-05
0.350302980279	3.644150e-05	3.843133e-05
0.350757375593	9.758400e-05	3.867818e-05
0.351211766495	9.327568e-05	3.802301e-05
0.351666152977	3.863830e-05	3.825765e-05
0.352120535036	7.485314e-05	3.798943e-05
0.352574912664	1.810410e-05	3.789703e-05
0.353029285857	3.423626e-05	3.790403e-05
0.353483654608	5.686466e-05	3.758766e-05
0.353938018912	2.990712e-05	3.777374e-05
0.354392378764	6.571488e-06	3.760325e-05
0.354846734157	8.489280e-05	3.764507e-05
0.355301085086	4.529187e-05	3.767011e-05
0.355755431546	2.738764e-05	3.745745e-05
0.35620977353	4.432662e-05	3.762762e-05
0.356664111034	6.242580e-05	3.748081e-05
0.357118444051	9.744659e-05	3.749725e-05
0.357572772576	4.197329e-05	3.733809e-05
0.358027096603	2.166206e-05	3.698506e-05
0.358481416127	-1.735151e-06	3.723193e-05
0.358935731141	5.255700e-05	3.686380e-05
0.359390041641	-8.373947e-06	3.736628e-05
0.359844347621	7.752082e-05	3.695210e-05
0.360298649074	6.369651e-05	3.729681e-05
0.360752945996	3.272495e-05	3.715422e-05
0.36120723838	5.474155e-05	3.697574e-05
0.361661526222	4.417109e-05	3.724728e-05
0.362115809515	2.881947e-05	3.701194e-05
0.362570088253	3.541563e-05	3.711826e-05
0.363024362432	5.550710e-05	3.715655e-05
0.363478632045	6.835843e-05	3.707884e-05
0.363932897087	-5.517063e-05	3.722007e-05
0.364387157552	6.466434e-05	3.693918e-05
0.364841413435	8.624999e-05	3.722176e-05
0.36529566473	4.861076e-05	3.694331e-05
0.365749911431	5.212235e-05	3.696564e-05
0.366204153532	4.373438e-05	3.717698e-05
0.366658391029	1.195974e-05	3.672185e-05
0.367112623915	5.082784e-05	3.711175e-05
0.367566852185	7.993252e-05	3.676793e-05
0.368021075832	4.225326e-05	3.702604e-05
0.368475294852	-2.171636e-05	3.678938e-05
0.36892950924	3.031050e-05	3.671528e-05
0.369383718988	-2.442750e-05	3.674110e-05
0.369837924091	5.887529e-05	3.664468e-05
0.370292124545	-2.421687e-05	3.669416e-05
0.370746320343	1.770100e-05	3.655024e-05
0.37120051148	1.812926e-05	3.654094e-05
0.371654697949	-6.785388e-05	3.667792e-05
0.372108879746	2.006913e-05	3.631337e-05
0.372563056865	-4.902132e-05	3.671640e-05
0.373017229299	6.259177e-05	3.648885e-05
0.373471397045	1.686651e-05	3.661460e-05
0.373925560095	-2.045657e-05	3.667636e-05
0.374379718444	3.308609e-05	3.653313e-05
0.374833872087	8.836094e-05	3.689180e-05
0.375288021017	-9.486440e-06	3.629918e-05
0.37574216523	4.783357e-05	3.689833e-05
0.37619630472	7.434673e-06	3.667845e-05
0.376650439481	8.051505e-05	3.665862e-05
0.377104569507	2.021473e-05	3.685330e-05
0.377558694793	3.709902e-05	3.643446e-05
0.378012815333	4.119918e-05	3.689483e-05
0.378466931122	2.882331e-05	3.688983e-05
0.378921042153	5.150242e-05	3.673514e-05
0.379375148422	2.572093e-05	3.698134e-05
0.379829249922	6.393073e-05	3.651280e-05
0.380283346649	2.769188e-05	3.702530e-05
0.380737438595	-1.332471e-05	3.667223e-05
0.381191525757	9.742323e-05	3.700201e-05
0.381645608127	7.096407e-05	3.688857e-05
0.382099685701	3.273664e-05	3.680534e-05
0.382553758473	5.298547e-06	3.703396e-05
0.383007826438	7.152960e-05	3.677341e-05
0.383461889588	4.026666e-05	3.702168e-05
0.38391594792	6.520023e-05	3.698797e-05
0.384370001427	8.729489e-05	3.695431e-05
0.384824050104	2.618837e-05	3.713279e-05
0.385278093945	2.729263e-05	3.670359e-05
0.385732132945	1.165193e-04	3.711767e-05
0.386186167097	4.152859e-05	3.698704e-05
0.386640196397	8.079898e-05	3.718571e-05
0.387094220838	6.029438e-05	3.714160e-05
0.387548240415	1.271213e-04	3.703179e-05
0.388002255123	-8.922791e-06	3.703046e-05
0.388456264955	7.508597e-06	3.685410e-05
0.388910269907	9.254172e-05	3.721631e-05
0.389364269972	5.499033e-05	3.717922e-05
0.389818265144	1.066632e-04	3.715003e-05
0.39027225542	6.614997e-05	3.729292e-05
0.390726240791	3.688275e-05	3.685583e-05
0.391180221254	-9.867118e-06	3.729409e-05
0.391634196802	-4.554035e-06	3.695971e-05
0.39208816743	3.160868e-05	3.720506e-05
0.392542133132	4.959870e-05	3.743522e-05
0.392996093903	-1.619820e-05	3.691987e-05
0.393450049737	2.611576e-05	3.715833e-05
0.393904000628	6.589704e-05	3.732042e-05
0.39435794657	2.888558e-05	3.721595e-05
0.394811887559	1.202550e-05	3.733562e-05
0.395265823588	1.100660e-05	3.707780e-05
0.395719754652	8.932271e-05	3.748095e-05
0.396173680746	4.199587e-06	3.712350e-05
0.396627601862	1.153387e-04	3.743625e-05
0.397081517997	-5.349392e-05	3.720144e-05
0.397535429145	-6.316750e-08	3.723230e-05
0.397989335299	-4.502062e-05	3.742157e-05
0.398443236454	1.961938e-06	3.725431e-05
0.398897132604	8.033294e-05	3.748829e-05
0.399351023745	3.158351e-05	3.716193e-05
0.39980490987	4.234339e-05	3.748293e-05
0.400258790974	4.101981e-05	3.732597e-05
0.40071266705	1.143833e-04	3.746269e-05
0.401166538095	4.905041e-05	3.760730e-05
0.401620404101	4.297829e-05	3.725974e-05
0.402074265063	1.389349e-05	3.767470e-05
0.402528120976	-6.448912e-06	3.734036e-05
0.402981971834	3.273753e-06	3.722672e-05
0.403435817631	4.761113e-05	3.761902e-05
0.403889658363	2.841780e-05	3.724278e-05
0.404343494022	3.552061e-05	3.783925e-05
0.404797324604	6.268407e-05	3.726232e-05
0.405251150103	6.447908e-05	3.748621e-05
0.405704970513	-2.334474e-05	3.777201e-05
0.40615878583	1.773403e-05	3.725997e-05
0.406612596046	5.073470e-05	3.782546e-05
0.407066401157	2.887400e-05	3.729623e-05
0.407520201156	5.717607e-05	3.747702e-05
0.40797399604	9.685127e-06	3.756099e-05
0.4084277858	2.200078e-05	3.730523e-05
0.408881570433	3.642511e-05	3.745147e-05
0.409335349933	-4.659100e-06	3.721552e-05
0.409789124293	4.734341e-05	3.747935e-05
0.410242893509	2.343815e-05	3.738151e-05
0.410696657574	9.140994e-05	3.726658e-05
0.411150416484	7.691542e-06	3.746111e-05
0.411604170232	6.801276e-05	3.712389e-05
0.412057918813	1.136417e-05	3.746265e-05
0.412511662221	1.680059e-06	3.714073e-05
0.412965400451	2.012427e-05	3.734165e-05
0.413419133497	1.600824e-05	3.741893e-05
0.413872861353	4.334853e-05	3.728354e-05
0.414326584015	2.253996e-05	3.739081e-05
0.414780301475	1.001956e-04	3.719080e-05
0.415234013729	5.778610e-05	3.748071e-05
0.415687720772	-1.704646e-05	3.736564e-05
0.416141422597	2.425071e-05	3.753640e-05
0.416595119198	7.167211e-05	3.744489e-05
0.417048810571	8.593993e-05	3.725732e-05
0.41750249671	7.065114e-05	3.761589e-05
0.417956177609	3.424140e-05	3.732714e-05
0.418409853262	1.531681e-05	3.741747e-05
0.418863523664	3.362797e-05	3.752225e-05
0.41931718881	4.642865e-05	3.735333e-05
0.419770848693	9.053950e-06	3.773246e-05
0.420224503308	5.494452e-05	3.715709e-05
0.420678152649	-1.165931e-05	3.766922e-05
0.421131796712	7.125023e-05	3.742387e-05
0.42158543549	4.917322e-06	3.755955e-05
0.422039068978	1.731700e-06	3.757272e-05
0.422492697169	1.764400e-05	3.718086e-05
0.42294632006	2.401523e-05	3.769495e-05
0.423399937643	8.082722e-05	3.757428e-05
0.423853549913	-3.236152e-05	3.761659e-05
0.424307156865	9.712489e-05	3.772744e-05
0.424760758494	-1.825906e-05	3.728611e-05
0.425214354793	2.821795e-05	3.780221e-05
0.425667945757	6.356679e-05	3.746012e-05
0.42612153138	2.863626e-05	3.756253e-05
0.426575111657	6.814400e-05	3.764869e-05
0.427028686582	8.807925e-07	3.760693e-05
0.42748225615	-4.471506e-05	3.787781e-05
0.427935820355	6.318815e-05	3.741576e-05
0.428389379191	5.725908e-05	3.774407e-05
0.428842932653	-2.248595e-05	3.761489e-05
0.429296480736	3.897014e-05	3.769744e-05
0.429750023433	6.219737e-05	3.793239e-05
0.430203560739	-2.649365e-05	3.744471e-05
0.430657092648	8.380051e-05	3.774558e-05
0.431110619156	4.557487e-05	3.760342e-05
0.431564140256	4.141848e-05	3.785621e-05
0.432017655942	7.750166e-06	3.775378e-05
0.43247116621	5.904780e-05	3.764782e-05
0.432924671053	8.624798e-05	3.812059e-05
0.433378170466	1.032178e-04	3.758765e-05
0.433831664443	-1.485381e-05	3.772240e-05
0.434285152979	7.440001e-05	3.781091e-05
0.434738636069	4.860049e-05	3.784453e-05
0.435192113706	4.396937e-05	3.812015e-05
0.435645585885	3.888389e-05	3.739242e-05
0.4360990526	3.243613e-05	3.793017e-05
0.436552513847	-5.752208e-06	3.769366e-05
0.437005969618	-1.145780e-06	3.784634e-05
0.43745941991	4.121586e-05	3.806651e-05
0.437912864715	2.456566e-05	3.756438e-05
0.438366304029	1.839149e-05	3.802586e-05
0.438819737846	-1.192203e-05	3.784544e-05
0.439273166161	1.617688e-05	3.778009e-05
0.439726588967	-6.495929e-06	3.792124e-05
0.440180006259	3.317262e-05	3.783357e-05
0.440633418032	3.851477e-05	3.810584e-05
0.44108682428	-5.994500e-06	3.789119e-05
0.441540224998	3.163434e-05	3.783172e-05
0.44199362018	-2.857323e-06	3.777007e-05
0.442447009819	-5.993782e-07	3.798744e-05
0.442900393912	-3.269808e-06	3.820192e-05
0.443353772452	5.258304e-05	3.773148e-05
0.443807145433	-4.896122e-05	3.795088e-05
0.44426051285	2.222086e-05	3.792354e-05
0.444713874698	5.537111e-05	3.812962e-05
0.445167230971	1.393028e-05	3.783048e-05
0.445620581663	4.779868e-06	3.807892e-05
0.446073926768	8.637291e-05	3.815477e-05
0.446527266282	-4.796538e-06	3.782819e-05
0.446980600198	4.767331e-06	3.816782e-05
0.447433928512	-1.410143e-06	3.783560e-05
0.447887251217	1.304542e-04	3.817179e-05
0.448340568307	3.235754e-05	3.821563e-05
0.448793879778	2.093408e-05	3.788279e-05
0.449247185624	-5.308592e-05	3.820476e-05
0.449700485839	1.215771e-04	3.797429e-05
0.450153780417	9.683247e-05	3.823829e-05
0.450607069353	3.833345e-05	3.817859e-05
0.451060352642	2.409913e-05	3.780645e-05
0.451513630278	9.487845e-05	3.851675e-05
0.451966902254	3.976890e-05	3.785279e-05
0.452420168567	8.875189e-06	3.849524e-05
0.45287342921	-1.951644e-05	3.787074e-05
0.453326684177	9.490712e-05	3.820549e-05
0.453779933463	6.640410e-05	3.853673e-05
0.454233177063	1.715589e-05	3.784431e-05
0.454686414971	2.902622e-05	3.832620e-05
0.455139647181	1.459142e-05	3.802455e-05
0.455592873688	9.466441e-06	3.826153e-05
0.456046094486	2.830173e-05	3.853206e-05
0.456499309569	9.273145e-05	3.789788e-05
0.456952518933	-8.707634e-07	3.838148e-05
0.457405722571	-8.305363e-06	3.819646e-05
0.457858920478	5.879936e-05	3.831748e-05
0.458312112648	2.257268e-05	3.846997e-05
0.458765299076	6.388193e-05	3.795213e-05
0.459218479756	1.013342e-04	3.850471e-05
0.459671654683	6.308965e-05	3.822202e-05
0.460124823852	5.527765e-05	3.845567e-05
0.460577987255	-8.516052e-06	3.829693e-05
0.461031144889	3.923771e-05	3.831858e-05
0.461484296747	2.925764e-05	3.854609e-05
0.461937442824	3.298557e-05	3.811581e-05
0.462390583114	-4.838564e-06	3.841063e-05
0.462843717612	2.778149e-05	3.822349e-05
0.463296846312	8.579928e-05	3.838791e-05
0.463749969209	1.354906e-05	3.851713e-05
0.464203086297	8.968643e-06	3.828644e-05
0.46465619757	-2.293379e-05	3.846050e-05
0.465109303024	1.392204e-05	3.821837e-05
0.465562402651	1.976842e-06	3.861038e-05
0.466015496448	2.081253e-05	3.849228e-05
0.466468584408	4.737571e-05	3.931945e-05
0.466921666525	-2.491152e-06	4.065607e-05
0.467374742795	5.517188e-05	4.098646e-05
0.467827813211	8.030310e-06	4.196905e-05
0.468280877769	3.691151e-05	4.206712e-05
0.468733936461	-2.207563e-05	4.278415e-05
0.469186989284	-9.376783e-05	4.361026e-05
0.469640036232	-1.795919e-05	4.338766e-05
0.470093077298	5.921491e-05	4.433455e-05
0.470546112477	3.832279e-05	4.439193e-05
0.470999141764	5.354652e-05	4.520099e-05
0.471452165154	2.056104e-05	4.567861e-05
0.471905182639	5.624806e-05	4.572611e-05
0.472358194217	7.006423e-06	4.647008e-05
0.472811199879	6.970854e-05	4.638919e-05
0.473264199622	5.566791e-06	4.716560e-05
0.473717193439	-2.320931e-05	4.726724e-05
0.474170181325	-1.819269e-05	4.762087e-05
0.474623163274	1.098342e-04	4.886077e-05
0.475076139281	1.214589e-05	4.833173e-05
0.47552910934	4.709604e-05	4.924247e-05
0.475982073446	9.421146e-06	4.870336e-05
0.476435031593	1.063111e-04	5.008229e-05
0.476887983776	6.926472e-05	5.038407e-05
0.477340929989	-6.179212e-05	5.066636e-05
0.477793870226	4.938842e-05	5.114728e-05
0.478246804482	8.884932e-06	5.049207e-05
0.478699732752	2.968055e-05	5.223716e-05
0.47915265503	2.148415e-05	5.159545e-05
0.479605571309	3.506186e-05	5.285269e-05
0.480058481586	-2.408399e-05	5.244445e-05
0.480511385854	-6.780116e-05	5.288728e-05
0.480964284108	1.864130e-04	5.403229e-05
0.481417176341	1.690124e-05	5.384189e-05
0.48187006255	1.249244e-04	5.416898e-05
0.482322942727	6.124686e-05	5.489679e-05
0.482775816868	2.577430e-05	5.550514e-05
0.483228684967	-3.147375e-05	5.586530e-05
0.483681547019	-2.554761e-06	5.527572e-05
0.484134403017	4.911910e-05	5.581425e-05
0.484587252957	2.173625e-05	5.665260e-05
0.485040096833	7.517714e-05	5.638042e-05
0.485492934639	8.410788e-05	5.633359e-05
0.485945766369	2.837539e-05	5.644582e-05
0.486398592019	4.083940e-05	5.660112e-05
0.486851411583	9.443158e-05	5.711936e-05
0.487304225054	-4.031014e-05	5.633092e-05
0.487757032429	7.478230e-05	5.699190e-05
0.4882098337	-3.267833e-05	5.713819e-05
0.488662628863	5.986887e-05	5.749860e-05
0.489115417912	-2.658688e-05	5.709932e-05
0.489568200842	5.148786e-05	5.684671e-05
0.490020977646	-4.510327e-05	5.766698e-05
0.49047374832	-3.324699e-05	5.733595e-05
0.490926512857	8.655059e-05	5.848273e-05
0.491379271253	3.652463e-05	5.762121e-05
0.491832023502	7.130375e-07	5.835517e-05
0.492284769598	8.080173e-05	5.857685e-05
0.492737509536	5.093768e-05	5.887323e-05
0.49319024331	3.485856e-05	5.854889e-05
0.493642970915	2.857086e-05	5.904313e-05
0.494095692345	-6.778863e-07	5.954878e-05
0.494548407594	4.183619e-05	5.984515e-05
0.495001116658	-4.866521e-05	5.955066e-05
0.49545381953	-3.992554e-05	5.975615e-05
0.495906516205	9.332363e-05	6.019902e-05
0.496359206678	5.322295e-05	6.112707e-05
0.496811890943	4.825231e-05	6.054959e-05
0.497264568994	-7.574503e-06	6.061318e-05
0.497717240826	4.132434e-05	6.108528e-05
0.498169906433	-2.536512e-05	6.165867e-05
0.498622565811	1.170758e-04	6.265607e-05
0.499075218952	-4.493267e-05	6.101246e-05
0.499527865853	4.721925e-06	6.192949e-05
0.499980506507	3.302206e-05	6.227702e-05
0.500433140908	-1.369653e-05	6.306422e-05
