# Supplementary material for: The cooperative binding of TDP-43 to GU-rich RNA repeats antagonizes TDP-43 aggregation
Source: eLife. 2021 Sep 7;10:e67605. doi: 10.7554/eLife.67605 (PMC8523171; doi:10.7554/eLife.67605)
Supplement: Figure 5—figure supplement 4—source data 1. [file elife-67605-fig5-figsupp4-data1.xlsx]

## Sheet: free-energy-landscape
Rg	RMSD	Gibbs Free Energy
2.8443	0.17252	19.7
2.85313	0.17252	19.7
2.86195	0.17252	19.7
2.87078	0.17252	19.7
2.87961	0.17252	19.7
2.88844	0.17252	19.7
2.89726	0.17252	19.7
2.90609	0.17252	19.7
2.91492	0.17252	19.7
2.92374	0.17252	19.7
2.93257	0.17252	19.7
2.9414	0.17252	19.7
2.95023	0.17252	14
2.95905	0.17252	11.5
2.96788	0.17252	12.3
2.97671	0.17252	11.5
2.98553	0.17252	11.5
2.99436	0.17252	15.6
3.00319	0.17252	19.7
3.01202	0.17252	19.7
3.02084	0.17252	19.7
3.02967	0.17252	19.7
3.0385	0.17252	19.7
3.04733	0.17252	19.7
3.05615	0.17252	19.7
3.06498	0.17252	19.7
3.07381	0.17252	19.7
3.08263	0.17252	19.7
3.09146	0.17252	19.7
3.10029	0.17252	19.7
3.10912	0.17252	19.7
3.11794	0.17252	19.7
2.8443	0.19067	19.7
2.85313	0.19067	19.7
2.86195	0.19067	19.7
2.87078	0.19067	19.7
2.87961	0.19067	19.7
2.88844	0.19067	19.7
2.89726	0.19067	19.7
2.90609	0.19067	19.7
2.91492	0.19067	17.3
2.92374	0.19067	11.5
2.93257	0.19067	9.05
2.9414	0.19067	5.76
2.95023	0.19067	4.11
2.95905	0.19067	3.29
2.96788	0.19067	3.29
2.97671	0.19067	4.11
2.98553	0.19067	4.93
2.99436	0.19067	5.76
3.00319	0.19067	9.05
3.01202	0.19067	14.8
3.02084	0.19067	18.9
3.02967	0.19067	19.7
3.0385	0.19067	19.7
3.04733	0.19067	19.7
3.05615	0.19067	19.7
3.06498	0.19067	19.7
3.07381	0.19067	19.7
3.08263	0.19067	19.7
3.09146	0.19067	19.7
3.10029	0.19067	19.7
3.10912	0.19067	19.7
3.11794	0.19067	19.7
2.8443	0.20882	19.7
2.85313	0.20882	19.7
2.86195	0.20882	19.7
2.87078	0.20882	19.7
2.87961	0.20882	19.7
2.88844	0.20882	19.7
2.89726	0.20882	15.6
2.90609	0.20882	13.2
2.91492	0.20882	8.22
2.92374	0.20882	4.93
2.93257	0.20882	3.29
2.9414	0.20882	1.64
2.95023	0.20882	0.822
2.95905	0.20882	1.64
2.96788	0.20882	1.64
2.97671	0.20882	2.47
2.98553	0.20882	3.29
2.99436	0.20882	4.11
3.00319	0.20882	6.58
3.01202	0.20882	9.05
3.02084	0.20882	12.3
3.02967	0.20882	17.3
3.0385	0.20882	19.7
3.04733	0.20882	19.7
3.05615	0.20882	19.7
3.06498	0.20882	19.7
3.07381	0.20882	19.7
3.08263	0.20882	19.7
3.09146	0.20882	19.7
3.10029	0.20882	19.7
3.10912	0.20882	19.7
3.11794	0.20882	19.7
2.8443	0.22697	19.7
2.85313	0.22697	19.7
2.86195	0.22697	19.7
2.87078	0.22697	19.7
2.87961	0.22697	19.7
2.88844	0.22697	17.3
2.89726	0.22697	10.7
2.90609	0.22697	6.58
2.91492	0.22697	4.11
2.92374	0.22697	1.64
2.93257	0.22697	0.822
2.9414	0.22697	0
2.95023	0.22697	0
2.95905	0.22697	0
2.96788	0.22697	0.822
2.97671	0.22697	0.822
2.98553	0.22697	1.64
2.99436	0.22697	2.47
3.00319	0.22697	4.11
3.01202	0.22697	4.93
3.02084	0.22697	6.58
3.02967	0.22697	8.22
3.0385	0.22697	10.7
3.04733	0.22697	15.6
3.05615	0.22697	19.7
3.06498	0.22697	19.7
3.07381	0.22697	19.7
3.08263	0.22697	19.7
3.09146	0.22697	19.7
3.10029	0.22697	19.7
3.10912	0.22697	19.7
3.11794	0.22697	19.7
2.8443	0.24512	19.7
2.85313	0.24512	19.7
2.86195	0.24512	19.7
2.87078	0.24512	19.7
2.87961	0.24512	14.8
2.88844	0.24512	9.87
2.89726	0.24512	6.58
2.90609	0.24512	4.11
2.91492	0.24512	2.47
2.92374	0.24512	1.64
2.93257	0.24512	0.822
2.9414	0.24512	0.822
2.95023	0.24512	0
2.95905	0.24512	0
2.96788	0.24512	0
2.97671	0.24512	0
2.98553	0.24512	0.822
2.99436	0.24512	1.64
3.00319	0.24512	2.47
3.01202	0.24512	3.29
3.02084	0.24512	4.11
3.02967	0.24512	5.76
3.0385	0.24512	7.4
3.04733	0.24512	10.7
3.05615	0.24512	15.6
3.06498	0.24512	19.7
3.07381	0.24512	19.7
3.08263	0.24512	19.7
3.09146	0.24512	19.7
3.10029	0.24512	19.7
3.10912	0.24512	19.7
3.11794	0.24512	19.7
2.8443	0.26327	19.7
2.85313	0.26327	19.7
2.86195	0.26327	19.7
2.87078	0.26327	19.7
2.87961	0.26327	12.3
2.88844	0.26327	9.05
2.89726	0.26327	7.4
2.90609	0.26327	4.93
2.91492	0.26327	3.29
2.92374	0.26327	2.47
2.93257	0.26327	1.64
2.9414	0.26327	1.64
2.95023	0.26327	1.64
2.95905	0.26327	0.822
2.96788	0.26327	0.822
2.97671	0.26327	0.822
2.98553	0.26327	0.822
2.99436	0.26327	0.822
3.00319	0.26327	0.822
3.01202	0.26327	1.64
3.02084	0.26327	2.47
3.02967	0.26327	4.11
3.0385	0.26327	5.76
3.04733	0.26327	7.4
3.05615	0.26327	9.87
3.06498	0.26327	18.9
3.07381	0.26327	19.7
3.08263	0.26327	19.7
3.09146	0.26327	19.7
3.10029	0.26327	19.7
3.10912	0.26327	19.7
3.11794	0.26327	19.7
2.8443	0.28142	19.7
2.85313	0.28142	19.7
2.86195	0.28142	18.9
2.87078	0.28142	13.2
2.87961	0.28142	10.7
2.88844	0.28142	7.4
2.89726	0.28142	4.93
2.90609	0.28142	4.93
2.91492	0.28142	4.11
2.92374	0.28142	3.29
2.93257	0.28142	3.29
2.9414	0.28142	3.29
2.95023	0.28142	2.47
2.95905	0.28142	2.47
2.96788	0.28142	1.64
2.97671	0.28142	1.64
2.98553	0.28142	0.822
2.99436	0.28142	0.822
3.00319	0.28142	0.822
3.01202	0.28142	0.822
3.02084	0.28142	1.64
3.02967	0.28142	1.64
3.0385	0.28142	3.29
3.04733	0.28142	4.11
3.05615	0.28142	5.76
3.06498	0.28142	8.22
3.07381	0.28142	11.5
3.08263	0.28142	14.8
3.09146	0.28142	15.6
3.10029	0.28142	19.7
3.10912	0.28142	19.7
3.11794	0.28142	19.7
2.8443	0.29957	17.3
2.85313	0.29957	15.6
2.86195	0.29957	12.3
2.87078	0.29957	9.05
2.87961	0.29957	6.58
2.88844	0.29957	5.76
2.89726	0.29957	4.93
2.90609	0.29957	4.11
2.91492	0.29957	3.29
2.92374	0.29957	3.29
2.93257	0.29957	3.29
2.9414	0.29957	3.29
2.95023	0.29957	3.29
2.95905	0.29957	3.29
2.96788	0.29957	2.47
2.97671	0.29957	1.64
2.98553	0.29957	1.64
2.99436	0.29957	0.822
3.00319	0.29957	0.822
3.01202	0.29957	1.64
3.02084	0.29957	1.64
3.02967	0.29957	1.64
3.0385	0.29957	2.47
3.04733	0.29957	3.29
3.05615	0.29957	4.11
3.06498	0.29957	5.76
3.07381	0.29957	6.58
3.08263	0.29957	9.05
3.09146	0.29957	11.5
3.10029	0.29957	19.7
3.10912	0.29957	19.7
3.11794	0.29957	19.7
2.8443	0.31772	17.3
2.85313	0.31772	15.6
2.86195	0.31772	13.2
2.87078	0.31772	9.87
2.87961	0.31772	9.05
2.88844	0.31772	7.4
2.89726	0.31772	6.58
2.90609	0.31772	4.93
2.91492	0.31772	4.11
2.92374	0.31772	3.29
2.93257	0.31772	3.29
2.9414	0.31772	3.29
2.95023	0.31772	3.29
2.95905	0.31772	3.29
2.96788	0.31772	3.29
2.97671	0.31772	2.47
2.98553	0.31772	2.47
2.99436	0.31772	2.47
3.00319	0.31772	2.47
3.01202	0.31772	1.64
3.02084	0.31772	2.47
3.02967	0.31772	3.29
3.0385	0.31772	4.11
3.04733	0.31772	4.93
3.05615	0.31772	5.76
3.06498	0.31772	6.58
3.07381	0.31772	7.4
3.08263	0.31772	7.4
3.09146	0.31772	9.05
3.10029	0.31772	11.5
3.10912	0.31772	17.3
3.11794	0.31772	19.7
2.8443	0.33587	19.7
2.85313	0.33587	19.7
2.86195	0.33587	17.3
2.87078	0.33587	14
2.87961	0.33587	9.87
2.88844	0.33587	8.22
2.89726	0.33587	8.22
2.90609	0.33587	6.58
2.91492	0.33587	5.76
2.92374	0.33587	4.11
2.93257	0.33587	3.29
2.9414	0.33587	3.29
2.95023	0.33587	2.47
2.95905	0.33587	3.29
2.96788	0.33587	4.11
2.97671	0.33587	4.11
2.98553	0.33587	4.93
2.99436	0.33587	4.93
3.00319	0.33587	4.93
3.01202	0.33587	4.93
3.02084	0.33587	4.11
3.02967	0.33587	4.11
3.0385	0.33587	4.93
3.04733	0.33587	6.58
3.05615	0.33587	7.4
3.06498	0.33587	8.22
3.07381	0.33587	9.87
3.08263	0.33587	10.7
3.09146	0.33587	10.7
3.10029	0.33587	10.7
3.10912	0.33587	12.3
3.11794	0.33587	18.9
2.8443	0.35402	19.7
2.85313	0.35402	19.7
2.86195	0.35402	17.3
2.87078	0.35402	15.6
2.87961	0.35402	17.3
2.88844	0.35402	10.7
2.89726	0.35402	9.05
2.90609	0.35402	7.4
2.91492	0.35402	5.76
2.92374	0.35402	4.11
2.93257	0.35402	4.11
2.9414	0.35402	3.29
2.95023	0.35402	3.29
2.95905	0.35402	3.29
2.96788	0.35402	4.11
2.97671	0.35402	4.93
2.98553	0.35402	5.76
2.99436	0.35402	6.58
3.00319	0.35402	7.4
3.01202	0.35402	7.4
3.02084	0.35402	6.58
3.02967	0.35402	5.76
3.0385	0.35402	6.58
3.04733	0.35402	8.22
3.05615	0.35402	10.7
3.06498	0.35402	12.3
3.07381	0.35402	11.5
3.08263	0.35402	15.6
3.09146	0.35402	15.6
3.10029	0.35402	19.7
3.10912	0.35402	19.7
3.11794	0.35402	19.7
2.8443	0.37217	19.7
2.85313	0.37217	19.7
2.86195	0.37217	17.3
2.87078	0.37217	12.3
2.87961	0.37217	14
2.88844	0.37217	14
2.89726	0.37217	9.87
2.90609	0.37217	8.22
2.91492	0.37217	6.58
2.92374	0.37217	5.76
2.93257	0.37217	4.93
2.9414	0.37217	3.29
2.95023	0.37217	3.29
2.95905	0.37217	3.29
2.96788	0.37217	4.11
2.97671	0.37217	5.76
2.98553	0.37217	6.58
2.99436	0.37217	9.87
3.00319	0.37217	10.7
3.01202	0.37217	9.87
3.02084	0.37217	7.4
3.02967	0.37217	7.4
3.0385	0.37217	7.4
3.04733	0.37217	9.87
3.05615	0.37217	9.87
3.06498	0.37217	14
3.07381	0.37217	15.6
3.08263	0.37217	19.7
3.09146	0.37217	19.7
3.10029	0.37217	19.7
3.10912	0.37217	19.7
3.11794	0.37217	19.7
2.8443	0.39032	19.7
2.85313	0.39032	19.7
2.86195	0.39032	19.7
2.87078	0.39032	19.7
2.87961	0.39032	19.7
2.88844	0.39032	19.7
2.89726	0.39032	14
2.90609	0.39032	9.87
2.91492	0.39032	7.4
2.92374	0.39032	7.4
2.93257	0.39032	5.76
2.9414	0.39032	4.11
2.95023	0.39032	4.11
2.95905	0.39032	4.11
2.96788	0.39032	4.93
2.97671	0.39032	5.76
2.98553	0.39032	9.05
2.99436	0.39032	14
3.00319	0.39032	11.5
3.01202	0.39032	12.3
3.02084	0.39032	13.2
3.02967	0.39032	10.7
3.0385	0.39032	10.7
3.04733	0.39032	9.87
3.05615	0.39032	10.7
3.06498	0.39032	14
3.07381	0.39032	15.6
3.08263	0.39032	19.7
3.09146	0.39032	19.7
3.10029	0.39032	19.7
3.10912	0.39032	19.7
3.11794	0.39032	19.7
2.8443	0.40847	19.7
2.85313	0.40847	19.7
2.86195	0.40847	19.7
2.87078	0.40847	19.7
2.87961	0.40847	19.7
2.88844	0.40847	14
2.89726	0.40847	14
2.90609	0.40847	9.87
2.91492	0.40847	9.05
2.92374	0.40847	8.22
2.93257	0.40847	6.58
2.9414	0.40847	5.76
2.95023	0.40847	4.11
2.95905	0.40847	4.93
2.96788	0.40847	4.93
2.97671	0.40847	5.76
2.98553	0.40847	8.22
2.99436	0.40847	10.7
3.00319	0.40847	14.8
3.01202	0.40847	14.8
3.02084	0.40847	13.2
3.02967	0.40847	13.2
3.0385	0.40847	10.7
3.04733	0.40847	10.7
3.05615	0.40847	10.7
3.06498	0.40847	13.2
3.07381	0.40847	17.3
3.08263	0.40847	19.7
3.09146	0.40847	19.7
3.10029	0.40847	19.7
3.10912	0.40847	19.7
3.11794	0.40847	19.7
2.8443	0.42662	19.7
2.85313	0.42662	19.7
2.86195	0.42662	19.7
2.87078	0.42662	19.7
2.87961	0.42662	19.7
2.88844	0.42662	18.9
2.89726	0.42662	11.5
2.90609	0.42662	10.7
2.91492	0.42662	9.87
2.92374	0.42662	9.05
2.93257	0.42662	7.4
2.9414	0.42662	6.58
2.95023	0.42662	5.76
2.95905	0.42662	6.58
2.96788	0.42662	5.76
2.97671	0.42662	6.58
2.98553	0.42662	7.4
2.99436	0.42662	9.05
3.00319	0.42662	15.6
3.01202	0.42662	18.9
3.02084	0.42662	14
3.02967	0.42662	14
3.0385	0.42662	13.2
3.04733	0.42662	14.8
3.05615	0.42662	14
3.06498	0.42662	14
3.07381	0.42662	19.7
3.08263	0.42662	19.7
3.09146	0.42662	19.7
3.10029	0.42662	19.7
3.10912	0.42662	19.7
3.11794	0.42662	19.7
2.8443	0.44477	19.7
2.85313	0.44477	19.7
2.86195	0.44477	19.7
2.87078	0.44477	19.7
2.87961	0.44477	19.7
2.88844	0.44477	17.3
2.89726	0.44477	15.6
2.90609	0.44477	14.8
2.91492	0.44477	14.8
2.92374	0.44477	9.87
2.93257	0.44477	9.05
2.9414	0.44477	7.4
2.95023	0.44477	7.4
2.95905	0.44477	8.22
2.96788	0.44477	8.22
2.97671	0.44477	9.87
2.98553	0.44477	11.5
2.99436	0.44477	14.8
3.00319	0.44477	19.7
3.01202	0.44477	15.6
3.02084	0.44477	17.3
3.02967	0.44477	14
3.0385	0.44477	15.6
3.04733	0.44477	15.6
3.05615	0.44477	13.2
3.06498	0.44477	17.3
3.07381	0.44477	17.3
3.08263	0.44477	19.7
3.09146	0.44477	19.7
3.10029	0.44477	19.7
3.10912	0.44477	19.7
3.11794	0.44477	19.7
2.8443	0.46292	19.7
2.85313	0.46292	19.7
2.86195	0.46292	19.7
2.87078	0.46292	19.7
2.87961	0.46292	19.7
2.88844	0.46292	19.7
2.89726	0.46292	19.7
2.90609	0.46292	19.7
2.91492	0.46292	14
2.92374	0.46292	12.3
2.93257	0.46292	9.87
2.9414	0.46292	8.22
2.95023	0.46292	7.4
2.95905	0.46292	7.4
2.96788	0.46292	9.87
2.97671	0.46292	11.5
2.98553	0.46292	13.2
2.99436	0.46292	17.3
3.00319	0.46292	14
3.01202	0.46292	15.6
3.02084	0.46292	19.7
3.02967	0.46292	19.7
3.0385	0.46292	19.7
3.04733	0.46292	19.7
3.05615	0.46292	17.3
3.06498	0.46292	13.2
3.07381	0.46292	18.9
3.08263	0.46292	18.9
3.09146	0.46292	19.7
3.10029	0.46292	19.7
3.10912	0.46292	19.7
3.11794	0.46292	19.7
2.8443	0.48107	19.7
2.85313	0.48107	19.7
2.86195	0.48107	19.7
2.87078	0.48107	19.7
2.87961	0.48107	19.7
2.88844	0.48107	19.7
2.89726	0.48107	19.7
2.90609	0.48107	18.9
2.91492	0.48107	12.3
2.92374	0.48107	10.7
2.93257	0.48107	10.7
2.9414	0.48107	10.7
2.95023	0.48107	9.87
2.95905	0.48107	10.7
2.96788	0.48107	10.7
2.97671	0.48107	9.87
2.98553	0.48107	9.87
2.99436	0.48107	10.7
3.00319	0.48107	11.5
3.01202	0.48107	14
3.02084	0.48107	17.3
3.02967	0.48107	19.7
3.0385	0.48107	19.7
3.04733	0.48107	19.7
3.05615	0.48107	19.7
3.06498	0.48107	19.7
3.07381	0.48107	19.7
3.08263	0.48107	19.7
3.09146	0.48107	19.7
3.10029	0.48107	19.7
3.10912	0.48107	19.7
3.11794	0.48107	19.7
2.8443	0.49922	19.7
2.85313	0.49922	19.7
2.86195	0.49922	19.7
2.87078	0.49922	19.7
2.87961	0.49922	19.7
2.88844	0.49922	19.7
2.89726	0.49922	19.7
2.90609	0.49922	19.7
2.91492	0.49922	14.8
2.92374	0.49922	13.2
2.93257	0.49922	11.5
2.9414	0.49922	9.05
2.95023	0.49922	10.7
2.95905	0.49922	11.5
2.96788	0.49922	12.3
2.97671	0.49922	11.5
2.98553	0.49922	10.7
2.99436	0.49922	14
3.00319	0.49922	15.6
3.01202	0.49922	19.7
3.02084	0.49922	19.7
3.02967	0.49922	19.7
3.0385	0.49922	19.7
3.04733	0.49922	19.7
3.05615	0.49922	19.7
3.06498	0.49922	19.7
3.07381	0.49922	19.7
3.08263	0.49922	19.7
3.09146	0.49922	19.7
3.10029	0.49922	19.7
3.10912	0.49922	19.7
3.11794	0.49922	19.7
2.8443	0.51736	19.7
2.85313	0.51736	19.7
2.86195	0.51736	19.7
2.87078	0.51736	19.7
2.87961	0.51736	19.7
2.88844	0.51736	19.7
2.89726	0.51736	19.7
2.90609	0.51736	18.9
2.91492	0.51736	14
2.92374	0.51736	13.2
2.93257	0.51736	12.3
2.9414	0.51736	11.5
2.95023	0.51736	12.3
2.95905	0.51736	17.3
2.96788	0.51736	13.2
2.97671	0.51736	11.5
2.98553	0.51736	14
2.99436	0.51736	17.3
3.00319	0.51736	19.7
3.01202	0.51736	19.7
3.02084	0.51736	19.7
3.02967	0.51736	19.7
3.0385	0.51736	19.7
3.04733	0.51736	19.7
3.05615	0.51736	19.7
3.06498	0.51736	19.7
3.07381	0.51736	19.7
3.08263	0.51736	19.7
3.09146	0.51736	19.7
3.10029	0.51736	19.7
3.10912	0.51736	19.7
3.11794	0.51736	19.7
2.8443	0.53551	19.7
2.85313	0.53551	19.7
2.86195	0.53551	19.7
2.87078	0.53551	19.7
2.87961	0.53551	19.7
2.88844	0.53551	19.7
2.89726	0.53551	19.7
2.90609	0.53551	19.7
2.91492	0.53551	19.7
2.92374	0.53551	19.7
2.93257	0.53551	17.3
2.9414	0.53551	15.6
2.95023	0.53551	11.5
2.95905	0.53551	11.5
2.96788	0.53551	11.5
2.97671	0.53551	10.7
2.98553	0.53551	11.5
2.99436	0.53551	15.6
3.00319	0.53551	18.9
3.01202	0.53551	19.7
3.02084	0.53551	19.7
3.02967	0.53551	19.7
3.0385	0.53551	19.7
3.04733	0.53551	19.7
3.05615	0.53551	19.7
3.06498	0.53551	19.7
3.07381	0.53551	19.7
3.08263	0.53551	19.7
3.09146	0.53551	19.7
3.10029	0.53551	19.7
3.10912	0.53551	19.7
3.11794	0.53551	19.7
2.8443	0.55366	19.7
2.85313	0.55366	19.7
2.86195	0.55366	19.7
2.87078	0.55366	19.7
2.87961	0.55366	19.7
2.88844	0.55366	19.7
2.89726	0.55366	19.7
2.90609	0.55366	19.7
2.91492	0.55366	15.6
2.92374	0.55366	14
2.93257	0.55366	11.5
2.9414	0.55366	9.87
2.95023	0.55366	9.87
2.95905	0.55366	9.87
2.96788	0.55366	8.22
2.97671	0.55366	9.05
2.98553	0.55366	9.87
2.99436	0.55366	12.3
3.00319	0.55366	12.3
3.01202	0.55366	9.87
3.02084	0.55366	11.5
3.02967	0.55366	18.9
3.0385	0.55366	19.7
3.04733	0.55366	19.7
3.05615	0.55366	19.7
3.06498	0.55366	19.7
3.07381	0.55366	19.7
3.08263	0.55366	19.7
3.09146	0.55366	19.7
3.10029	0.55366	19.7
3.10912	0.55366	19.7
3.11794	0.55366	19.7
2.8443	0.57181	19.7
2.85313	0.57181	19.7
2.86195	0.57181	19.7
2.87078	0.57181	19.7
2.87961	0.57181	19.7
2.88844	0.57181	19.7
2.89726	0.57181	19.7
2.90609	0.57181	19.7
2.91492	0.57181	11.5
2.92374	0.57181	11.5
2.93257	0.57181	11.5
2.9414	0.57181	9.87
2.95023	0.57181	8.22
2.95905	0.57181	8.22
2.96788	0.57181	9.05
2.97671	0.57181	8.22
2.98553	0.57181	9.05
2.99436	0.57181	10.7
3.00319	0.57181	9.87
3.01202	0.57181	10.7
3.02084	0.57181	12.3
3.02967	0.57181	13.2
3.0385	0.57181	15.6
3.04733	0.57181	19.7
3.05615	0.57181	19.7
3.06498	0.57181	19.7
3.07381	0.57181	19.7
3.08263	0.57181	19.7
3.09146	0.57181	19.7
3.10029	0.57181	19.7
3.10912	0.57181	19.7
3.11794	0.57181	19.7
2.8443	0.58996	19.7
2.85313	0.58996	19.7
2.86195	0.58996	19.7
2.87078	0.58996	14
2.87961	0.58996	13.2
2.88844	0.58996	14
2.89726	0.58996	18.9
2.90609	0.58996	17.3
2.91492	0.58996	10.7
2.92374	0.58996	9.87
2.93257	0.58996	9.05
2.9414	0.58996	9.05
2.95023	0.58996	8.22
2.95905	0.58996	8.22
2.96788	0.58996	9.87
2.97671	0.58996	9.87
2.98553	0.58996	9.87
2.99436	0.58996	10.7
3.00319	0.58996	11.5
3.01202	0.58996	10.7
3.02084	0.58996	13.2
3.02967	0.58996	19.7
3.0385	0.58996	19.7
3.04733	0.58996	19.7
3.05615	0.58996	19.7
3.06498	0.58996	19.7
3.07381	0.58996	19.7
3.08263	0.58996	19.7
3.09146	0.58996	19.7
3.10029	0.58996	19.7
3.10912	0.58996	19.7
3.11794	0.58996	19.7
2.8443	0.60811	19.7
2.85313	0.60811	19.7
2.86195	0.60811	14
2.87078	0.60811	13.2
2.87961	0.60811	12.3
2.88844	0.60811	12.3
2.89726	0.60811	9.87
2.90609	0.60811	8.22
2.91492	0.60811	7.4
2.92374	0.60811	6.58
2.93257	0.60811	6.58
2.9414	0.60811	7.4
2.95023	0.60811	9.05
2.95905	0.60811	9.05
2.96788	0.60811	9.05
2.97671	0.60811	8.22
2.98553	0.60811	8.22
2.99436	0.60811	8.22
3.00319	0.60811	10.7
3.01202	0.60811	13.2
3.02084	0.60811	14
3.02967	0.60811	19.7
3.0385	0.60811	19.7
3.04733	0.60811	19.7
3.05615	0.60811	19.7
3.06498	0.60811	19.7
3.07381	0.60811	19.7
3.08263	0.60811	19.7
3.09146	0.60811	19.7
3.10029	0.60811	19.7
3.10912	0.60811	19.7
3.11794	0.60811	19.7
2.8443	0.62626	19.7
2.85313	0.62626	14
2.86195	0.62626	11.5
2.87078	0.62626	12.3
2.87961	0.62626	11.5
2.88844	0.62626	9.05
2.89726	0.62626	8.22
2.90609	0.62626	7.4
2.91492	0.62626	6.58
2.92374	0.62626	7.4
2.93257	0.62626	8.22
2.9414	0.62626	7.4
2.95023	0.62626	8.22
2.95905	0.62626	11.5
2.96788	0.62626	12.3
2.97671	0.62626	10.7
2.98553	0.62626	10.7
2.99436	0.62626	9.87
3.00319	0.62626	10.7
3.01202	0.62626	14
3.02084	0.62626	19.7
3.02967	0.62626	19.7
3.0385	0.62626	19.7
3.04733	0.62626	19.7
3.05615	0.62626	19.7
3.06498	0.62626	19.7
3.07381	0.62626	19.7
3.08263	0.62626	19.7
3.09146	0.62626	19.7
3.10029	0.62626	19.7
3.10912	0.62626	19.7
3.11794	0.62626	19.7
2.8443	0.64441	19.7
2.85313	0.64441	19.7
2.86195	0.64441	19.7
2.87078	0.64441	13.2
2.87961	0.64441	11.5
2.88844	0.64441	11.5
2.89726	0.64441	11.5
2.90609	0.64441	9.87
2.91492	0.64441	9.87
2.92374	0.64441	10.7
2.93257	0.64441	11.5
2.9414	0.64441	11.5
2.95023	0.64441	12.3
2.95905	0.64441	17.3
2.96788	0.64441	19.7
2.97671	0.64441	19.7
2.98553	0.64441	19.7
2.99436	0.64441	19.7
3.00319	0.64441	19.7
3.01202	0.64441	19.7
3.02084	0.64441	19.7
3.02967	0.64441	19.7
3.0385	0.64441	19.7
3.04733	0.64441	19.7
3.05615	0.64441	19.7
3.06498	0.64441	19.7
3.07381	0.64441	19.7
3.08263	0.64441	19.7
3.09146	0.64441	19.7
3.10029	0.64441	19.7
3.10912	0.64441	19.7
3.11794	0.64441	19.7
2.8443	0.66256	19.7
2.85313	0.66256	19.7
2.86195	0.66256	19.7
2.87078	0.66256	14
2.87961	0.66256	9.87
2.88844	0.66256	9.05
2.89726	0.66256	9.05
2.90609	0.66256	9.87
2.91492	0.66256	9.87
2.92374	0.66256	10.7
2.93257	0.66256	11.5
2.9414	0.66256	13.2
2.95023	0.66256	19.7
2.95905	0.66256	19.7
2.96788	0.66256	19.7
2.97671	0.66256	19.7
2.98553	0.66256	19.7
2.99436	0.66256	19.7
3.00319	0.66256	19.7
3.01202	0.66256	19.7
3.02084	0.66256	19.7
3.02967	0.66256	19.7
3.0385	0.66256	19.7
3.04733	0.66256	19.7
3.05615	0.66256	19.7
3.06498	0.66256	19.7
3.07381	0.66256	19.7
3.08263	0.66256	19.7
3.09146	0.66256	19.7
3.10029	0.66256	19.7
3.10912	0.66256	19.7
3.11794	0.66256	19.7
2.8443	0.68071	19.7
2.85313	0.68071	19.7
2.86195	0.68071	19.7
2.87078	0.68071	14
2.87961	0.68071	9.87
2.88844	0.68071	10.7
2.89726	0.68071	10.7
2.90609	0.68071	10.7
2.91492	0.68071	9.87
2.92374	0.68071	9.05
2.93257	0.68071	10.7
2.9414	0.68071	14
2.95023	0.68071	18.9
2.95905	0.68071	19.7
2.96788	0.68071	19.7
2.97671	0.68071	19.7
2.98553	0.68071	19.7
2.99436	0.68071	19.7
3.00319	0.68071	19.7
3.01202	0.68071	19.7
3.02084	0.68071	19.7
3.02967	0.68071	19.7
3.0385	0.68071	19.7
3.04733	0.68071	19.7
3.05615	0.68071	19.7
3.06498	0.68071	19.7
3.07381	0.68071	19.7
3.08263	0.68071	19.7
3.09146	0.68071	19.7
3.10029	0.68071	19.7
3.10912	0.68071	19.7
3.11794	0.68071	19.7
2.8443	0.69886	19.7
2.85313	0.69886	19.7
2.86195	0.69886	18.9
2.87078	0.69886	13.2
2.87961	0.69886	10.7
2.88844	0.69886	13.2
2.89726	0.69886	14.8
2.90609	0.69886	15.6
2.91492	0.69886	13.2
2.92374	0.69886	12.3
2.93257	0.69886	14
2.9414	0.69886	15.6
2.95023	0.69886	19.7
2.95905	0.69886	19.7
2.96788	0.69886	19.7
2.97671	0.69886	19.7
2.98553	0.69886	19.7
2.99436	0.69886	19.7
3.00319	0.69886	19.7
3.01202	0.69886	19.7
3.02084	0.69886	19.7
3.02967	0.69886	19.7
3.0385	0.69886	19.7
3.04733	0.69886	19.7
3.05615	0.69886	19.7
3.06498	0.69886	19.7
3.07381	0.69886	19.7
3.08263	0.69886	19.7
3.09146	0.69886	19.7
3.10029	0.69886	19.7
3.10912	0.69886	19.7
3.11794	0.69886	19.7
2.8443	0.71701	19.7
2.85313	0.71701	19.7
2.86195	0.71701	19.7
2.87078	0.71701	14
2.87961	0.71701	17.3
2.88844	0.71701	19.7
2.89726	0.71701	19.7
2.90609	0.71701	19.7
2.91492	0.71701	19.7
2.92374	0.71701	14
2.93257	0.71701	15.6
2.9414	0.71701	18.9
2.95023	0.71701	19.7
2.95905	0.71701	19.7
2.96788	0.71701	19.7
2.97671	0.71701	19.7
2.98553	0.71701	19.7
2.99436	0.71701	19.7
3.00319	0.71701	19.7
3.01202	0.71701	19.7
3.02084	0.71701	19.7
3.02967	0.71701	19.7
3.0385	0.71701	19.7
3.04733	0.71701	19.7
3.05615	0.71701	19.7
3.06498	0.71701	19.7
3.07381	0.71701	19.7
3.08263	0.71701	19.7
3.09146	0.71701	19.7
3.10029	0.71701	19.7
3.10912	0.71701	19.7
3.11794	0.71701	19.7
2.8443	0.73516	19.7
2.85313	0.73516	19.7
2.86195	0.73516	19.7
2.87078	0.73516	19.7
2.87961	0.73516	19.7
2.88844	0.73516	19.7
2.89726	0.73516	19.7
2.90609	0.73516	19.7
2.91492	0.73516	18.9
2.92374	0.73516	19.7
2.93257	0.73516	14.8
2.9414	0.73516	19.7
2.95023	0.73516	19.7
2.95905	0.73516	19.7
2.96788	0.73516	19.7
2.97671	0.73516	19.7
2.98553	0.73516	19.7
2.99436	0.73516	19.7
3.00319	0.73516	19.7
3.01202	0.73516	19.7
3.02084	0.73516	19.7
3.02967	0.73516	19.7
3.0385	0.73516	19.7
3.04733	0.73516	19.7
3.05615	0.73516	19.7
3.06498	0.73516	19.7
3.07381	0.73516	19.7
3.08263	0.73516	19.7
3.09146	0.73516	19.7
3.10029	0.73516	19.7
3.10912	0.73516	19.7
3.11794	0.73516	19.7
