# Supplementary material for: The cooperative binding of TDP-43 to GU-rich RNA repeats antagonizes TDP-43 aggregation
Source: eLife. 2021 Sep 7;10:e67605. doi: 10.7554/eLife.67605 (PMC8523171; doi:10.7554/eLife.67605)
Supplement: Figure 5—source data 1. [file elife-67605-fig5-data1.xlsx]

## Sheet: Figure 5a
#US-SOMO: SAXS HPLC data: RRM1-2 + (GU)12
#q	I(q)	sd
0.0060813237544	1.075560e+00	2.490573e-02
0.00658810030501	1.085296e+00	1.786991e-02
0.00709487675269	1.067039e+00	1.424079e-02
0.00760165308951	1.079631e+00	1.262839e-02
0.00810842930755	1.066943e+00	1.192765e-02
0.0086152053989	1.056701e+00	1.043349e-02
0.00912198135563	1.056271e+00	9.881882e-03
0.00962875716983	1.057347e+00	9.360059e-03
0.0101355328336	1.034301e+00	8.640587e-03
0.010642308339	1.069176e+00	8.451491e-03
0.0111490836781	1.035083e+00	7.694417e-03
0.011655858843	1.050052e+00	7.739519e-03
0.0121626338257	1.046864e+00	7.325107e-03
0.0126694086185	1.030390e+00	6.872277e-03
0.0131761832132	1.042036e+00	6.796335e-03
0.0136829576021	1.027917e+00	6.458099e-03
0.0141897317772	1.032582e+00	6.604154e-03
0.0146965057306	1.016363e+00	6.133664e-03
0.0152032794543	1.019477e+00	6.016502e-03
0.0157100529405	1.022624e+00	5.910226e-03
0.0162168261812	1.016225e+00	5.721320e-03
0.0167235991686	1.014979e+00	5.706631e-03
0.0172303718946	9.892859e-01	5.385025e-03
0.0177371443514	1.008492e+00	5.367660e-03
0.0182439165311	9.979894e-01	5.345227e-03
0.0187506884257	9.814435e-01	5.124579e-03
0.0192574600273	9.777262e-01	5.128380e-03
0.0197642313281	9.683529e-01	4.882810e-03
0.02027100232	9.684892e-01	4.971424e-03
0.0207777729952	9.687134e-01	4.795895e-03
0.0212845433457	9.627165e-01	4.726521e-03
0.0217913133637	9.487588e-01	4.655270e-03
0.0222980830412	9.399355e-01	4.526295e-03
0.0228048523703	9.382006e-01	4.616431e-03
0.0233116213431	9.265472e-01	4.398296e-03
0.0238183899516	9.260480e-01	4.414339e-03
0.024325158188	9.216560e-01	4.326632e-03
0.0248319260443	9.050306e-01	4.217845e-03
0.0253386935126	9.049864e-01	4.211439e-03
0.025845460585	8.926012e-01	4.101126e-03
0.0263522272536	8.793972e-01	4.106252e-03
0.0268589935104	8.825701e-01	4.035566e-03
0.0273657593476	8.734574e-01	4.166077e-03
0.0278725247572	8.649056e-01	4.138299e-03
0.0283792897313	8.558616e-01	4.066013e-03
0.028886054262	8.491721e-01	4.176872e-03
0.0293928183413	8.389638e-01	4.008301e-03
0.0298995819614	8.304063e-01	4.131020e-03
0.0304063451144	8.228691e-01	4.035539e-03
0.0309131077922	8.216913e-01	4.001028e-03
0.0314198699871	8.226995e-01	4.103121e-03
0.031926631691	8.047888e-01	3.898403e-03
0.0324333928961	8.039379e-01	4.059203e-03
0.0329401535945	7.879361e-01	3.910419e-03
0.0334469137782	7.869573e-01	3.908255e-03
0.0339536734393	7.756175e-01	3.906566e-03
0.0344604325699	7.611098e-01	3.806610e-03
0.0349671911621	7.644528e-01	3.908646e-03
0.0354739492079	7.511442e-01	3.796621e-03
0.0359807066995	7.332102e-01	3.803264e-03
0.0364874636289	7.372325e-01	3.800100e-03
0.0369942199883	7.301378e-01	3.667565e-03
0.0375009757696	7.218843e-01	3.790293e-03
0.038007730965	7.107018e-01	3.623816e-03
0.0385144855666	7.074447e-01	3.691839e-03
0.0390212395665	6.959750e-01	3.653610e-03
0.0395279929566	6.848842e-01	3.595378e-03
0.0400347457292	6.781330e-01	3.652800e-03
0.0405414978763	6.769861e-01	3.551167e-03
0.04104824939	6.580564e-01	3.546016e-03
0.0415550002623	6.531954e-01	3.529463e-03
0.0420617504854	6.443759e-01	3.523682e-03
0.0425685000513	6.425834e-01	3.477752e-03
0.0430752489521	6.326463e-01	3.447921e-03
0.04358199718	6.214067e-01	3.421710e-03
0.0440887447269	6.098906e-01	3.437725e-03
0.044595491585	6.054489e-01	3.381377e-03
0.0451022377464	5.972982e-01	3.366361e-03
0.0456089832031	5.882995e-01	3.325241e-03
0.0461157279472	5.836121e-01	3.333462e-03
0.0466224719708	5.720483e-01	3.292975e-03
0.047129215266	5.692170e-01	3.305016e-03
0.0476359578249	5.613775e-01	3.270603e-03
0.0481426996396	5.589713e-01	3.243533e-03
0.0486494407021	5.476948e-01	3.233075e-03
0.0491561810045	5.329100e-01	3.166121e-03
0.049662920539	5.331760e-01	3.214911e-03
0.0501696592975	5.240289e-01	3.123155e-03
0.0506763972723	5.204223e-01	3.174534e-03
0.0511831344553	5.094787e-01	3.128432e-03
0.0516898708387	5.060440e-01	3.100894e-03
0.0521966064145	4.932541e-01	3.094282e-03
0.0527033411748	4.896831e-01	3.066501e-03
0.0532100751118	4.793944e-01	3.085330e-03
0.0537168082174	4.740539e-01	3.019658e-03
0.0542235404839	4.677774e-01	2.987203e-03
0.0547302719032	4.620710e-01	3.028994e-03
0.0552370024675	4.551737e-01	2.963926e-03
0.0557437321688	4.424560e-01	2.985585e-03
0.0562504609992	4.425297e-01	2.936889e-03
0.0567571889508	4.342508e-01	2.934644e-03
0.0572639160158	4.309760e-01	2.932596e-03
0.0577706421861	4.179730e-01	2.869458e-03
0.0582773674539	4.108501e-01	2.892075e-03
0.0587840918112	4.085303e-01	2.845121e-03
0.0592908152502	3.978322e-01	2.863914e-03
0.0597975377629	3.964286e-01	2.833397e-03
0.0603042593415	3.941084e-01	2.818952e-03
0.0608109799779	3.810827e-01	2.802989e-03
0.0613176996643	3.798215e-01	2.796008e-03
0.0618244183928	3.737309e-01	2.767830e-03
0.0623311361555	3.655136e-01	2.758491e-03
0.0628378529444	3.608058e-01	2.738712e-03
0.0633445687516	3.561475e-01	2.728111e-03
0.0638512835693	3.516854e-01	2.716512e-03
0.0643579973895	3.450653e-01	2.723348e-03
0.0648647102043	3.393948e-01	2.655519e-03
0.0653714220057	3.395804e-01	2.710704e-03
0.065878132786	3.310118e-01	2.665393e-03
0.0663848425371	3.272398e-01	2.641796e-03
0.0668915512511	3.192241e-01	2.643801e-03
0.0673982589202	3.134463e-01	2.597070e-03
0.0679049655364	3.112134e-01	2.631704e-03
0.0684116710918	3.052505e-01	2.594454e-03
0.0689183755785	3.022057e-01	2.593324e-03
0.0694250789886	3.013904e-01	2.582772e-03
0.0699317813141	2.921594e-01	2.561526e-03
0.0704384825473	2.858311e-01	2.551133e-03
0.07094518268	2.832740e-01	2.536339e-03
0.0714518817046	2.812941e-01	2.518633e-03
0.0719585796129	2.730374e-01	2.542925e-03
0.0724652763972	2.748311e-01	2.498361e-03
0.0729719720494	2.677631e-01	2.512183e-03
0.0734786665618	2.630340e-01	2.465048e-03
0.0739853599263	2.656790e-01	2.470875e-03
0.0744920521352	2.581059e-01	2.475857e-03
0.0749987431803	2.469092e-01	2.433403e-03
0.075505433054	2.468106e-01	2.439661e-03
0.0760121217481	2.432234e-01	2.424363e-03
0.0765188092549	2.373580e-01	2.453275e-03
0.0770254955664	2.325180e-01	2.385820e-03
0.0775321806748	2.362345e-01	2.416525e-03
0.078038864572	2.276686e-01	2.388626e-03
0.0785455472502	2.266899e-01	2.385606e-03
0.0790522287015	2.190060e-01	2.425100e-03
0.079558908918	2.171254e-01	2.416173e-03
0.0800655878917	2.134890e-01	2.482380e-03
0.0805722656147	2.093723e-01	2.495588e-03
0.0810789420793	2.100379e-01	2.483707e-03
0.0815856172773	2.096317e-01	2.508577e-03
0.0820922912009	1.999064e-01	2.440750e-03
0.0825989638423	1.988610e-01	2.493451e-03
0.0831056351935	2.007691e-01	2.481752e-03
0.0836123052465	1.922239e-01	2.472084e-03
0.0841189739936	1.962971e-01	2.477054e-03
0.0846256414267	1.900567e-01	2.442747e-03
0.085132307538	1.856702e-01	2.496714e-03
0.0856389723196	1.871627e-01	2.454936e-03
0.0861456357635	1.826025e-01	2.469155e-03
0.0866522978618	1.801466e-01	2.449145e-03
0.0871589586067	1.693428e-01	2.437935e-03
0.0876656179902	1.765017e-01	2.468058e-03
0.0881722760044	1.732456e-01	2.421443e-03
0.0886789326414	1.713920e-01	2.448466e-03
0.0891855878934	1.686703e-01	2.449588e-03
0.0896922417523	1.626367e-01	2.436878e-03
0.0901988942103	1.613873e-01	2.442168e-03
0.0907055452595	1.587396e-01	2.392786e-03
0.091212194892	1.548803e-01	2.421802e-03
0.0917188430998	1.556892e-01	2.412189e-03
0.0922254898751	1.504521e-01	2.409215e-03
0.09273213521	1.519113e-01	2.400123e-03
0.0932387790965	1.502845e-01	2.399831e-03
0.0937454215267	1.496634e-01	2.412427e-03
0.0942520624928	1.462786e-01	2.372682e-03
0.0947587019867	1.362736e-01	2.374762e-03
0.0952653400008	1.368225e-01	2.386419e-03
0.0957719765269	1.355887e-01	2.366318e-03
0.0962786115572	1.392942e-01	2.396341e-03
0.0967852450839	1.331163e-01	2.358198e-03
0.0972918770989	1.314400e-01	2.367060e-03
0.0977985075944	1.324011e-01	2.371930e-03
0.0983051365625	1.263192e-01	2.359776e-03
0.0988117639953	1.295787e-01	2.354707e-03
0.0993183898849	1.282063e-01	2.318731e-03
0.0998250142234	1.224873e-01	2.357671e-03
0.100331637003	1.259337e-01	2.331249e-03
0.100838258215	1.238690e-01	2.351291e-03
0.101344877853	1.221637e-01	2.332935e-03
0.101851495908	1.200922e-01	2.315944e-03
0.102358112372	1.194568e-01	2.364820e-03
0.102864727238	1.157470e-01	2.299854e-03
0.103371340497	1.110164e-01	2.406850e-03
0.103877952142	1.136275e-01	2.426889e-03
0.104384562164	1.157095e-01	2.483112e-03
0.104891170557	1.123370e-01	2.507193e-03
0.105397777311	1.081910e-01	2.503586e-03
0.105904382419	1.093287e-01	2.539768e-03
0.106410985874	1.084562e-01	2.547594e-03
0.106917587667	1.080349e-01	2.582486e-03
0.10742418779	1.032140e-01	2.594082e-03
0.107930786235	1.045749e-01	2.589132e-03
0.108437382995	1.021039e-01	2.638730e-03
0.108943978062	9.952611e-02	2.601240e-03
0.109450571427	9.674268e-02	2.671941e-03
0.109957163083	9.842121e-02	2.634448e-03
0.110463753022	9.269458e-02	2.663539e-03
0.110970341236	9.960522e-02	2.722694e-03
0.111476927717	9.352143e-02	2.665496e-03
0.111983512457	9.067828e-02	2.722341e-03
0.112490095449	9.142909e-02	2.707447e-03
0.112996676684	9.276604e-02	2.623138e-03
0.113503256154	9.111623e-02	2.558200e-03
0.114009833852	8.948538e-02	2.540070e-03
0.11451640977	8.865302e-02	2.506895e-03
0.115022983899	8.764841e-02	2.471096e-03
0.115529556233	8.654373e-02	2.460210e-03
0.116036126762	8.445948e-02	2.449929e-03
0.11654269548	7.554193e-02	2.431250e-03
0.117049262377	8.089206e-02	2.445941e-03
0.117555827447	7.795551e-02	2.394224e-03
0.118062390682	7.952675e-02	2.413014e-03
0.118568952073	7.759020e-02	2.377882e-03
0.119075511612	7.550294e-02	2.388983e-03
0.119582069292	7.173625e-02	2.361659e-03
0.120088625105	7.624326e-02	2.373190e-03
0.120595179043	7.349875e-02	2.372136e-03
0.121101731098	7.265397e-02	2.326917e-03
0.121608281262	7.332957e-02	2.351553e-03
0.122114829527	7.116477e-02	2.333054e-03
0.122621375886	7.004897e-02	2.318893e-03
0.123127920329	7.489896e-02	2.339006e-03
0.123634462851	6.828338e-02	2.295394e-03
0.124141003442	6.989002e-02	2.315112e-03
0.124647542094	6.326297e-02	2.277807e-03
0.125154078801	6.696503e-02	2.291466e-03
0.125660613553	6.405664e-02	2.293871e-03
0.126167146344	6.426937e-02	2.288174e-03
0.126673677165	6.251846e-02	2.287429e-03
0.127180206007	6.434315e-02	2.251105e-03
0.127686732865	6.390046e-02	2.271089e-03
0.128193257728	5.945683e-02	2.260411e-03
0.12869978059	5.852451e-02	2.249749e-03
0.129206301443	5.918365e-02	2.243898e-03
0.129712820279	5.693797e-02	2.230645e-03
0.130219337089	5.352129e-02	2.238057e-03
0.130725851866	5.559970e-02	2.219454e-03
0.131232364603	5.668526e-02	2.216094e-03
0.13173887529	5.451769e-02	2.203954e-03
0.132245383921	5.371639e-02	2.183720e-03
0.132751890488	5.517300e-02	2.197671e-03
0.133258394981	5.366801e-02	2.169328e-03
0.133764897395	5.025281e-02	2.178099e-03
0.13427139772	4.819396e-02	2.162631e-03
0.134777895949	5.273188e-02	2.154652e-03
0.135284392073	5.185082e-02	2.163417e-03
0.135790886086	5.268080e-02	2.111656e-03
0.136297377979	5.089372e-02	2.140900e-03
0.136803867744	5.004828e-02	2.130620e-03
0.137310355374	4.517395e-02	2.111062e-03
0.13781684086	4.691918e-02	2.120830e-03
0.138323324194	4.604600e-02	2.087868e-03
0.13882980537	4.461915e-02	2.130760e-03
0.139336284377	4.177144e-02	2.083813e-03
0.13984276121	4.558671e-02	2.104807e-03
0.14034923586	4.582390e-02	2.088960e-03
0.140855708319	4.769737e-02	2.093638e-03
0.141362178579	4.006890e-02	2.093642e-03
0.141868646633	4.638226e-02	2.083096e-03
0.142375112471	3.656761e-02	2.072383e-03
0.142881576088	4.115363e-02	2.083374e-03
0.143388037474	3.955575e-02	2.080997e-03
0.143894496622	3.888142e-02	2.077430e-03
0.144400953523	4.092643e-02	2.047641e-03
0.144907408171	3.885608e-02	2.060628e-03
0.145413860557	3.759551e-02	2.069793e-03
0.145920310673	3.736183e-02	2.059022e-03
0.146426758511	3.483544e-02	2.045205e-03
0.146933204064	3.185922e-02	2.048665e-03
0.147439647323	3.390876e-02	2.050680e-03
0.147946088281	3.643369e-02	2.050587e-03
0.148452526929	3.517143e-02	2.032434e-03
0.148958963261	3.380350e-02	2.032017e-03
0.149465397267	3.230103e-02	2.038325e-03
0.149971828941	3.222101e-02	2.034992e-03
0.150478258273	3.310595e-02	2.037124e-03
0.150984685257	3.395100e-02	2.020791e-03
0.151491109885	3.506483e-02	2.029087e-03
0.151997532148	2.819548e-02	2.024404e-03
0.152503952038	3.338567e-02	2.016204e-03
0.153010369549	3.053367e-02	2.010266e-03
0.153516784671	3.211533e-02	2.015146e-03
0.154023197397	2.955472e-02	2.015080e-03
0.15452960772	3.292209e-02	2.008835e-03
0.15503601563	3.252207e-02	2.000531e-03
0.155542421121	2.973496e-02	1.994583e-03
0.156048824185	2.681542e-02	2.008024e-03
0.156555224813	2.940629e-02	1.987688e-03
0.157061622997	2.535509e-02	1.989498e-03
0.157568018731	2.761506e-02	1.993571e-03
0.158074412005	2.845562e-02	1.986235e-03
0.158580802812	2.687721e-02	1.990619e-03
0.159087191145	2.738325e-02	1.975065e-03
0.159593576995	2.452446e-02	1.975586e-03
0.160099960354	2.804668e-02	1.977595e-03
0.160606341215	3.338869e-02	1.984576e-03
0.161112719569	2.555155e-02	1.972261e-03
0.161619095409	2.432464e-02	1.957537e-03
0.162125468727	2.337166e-02	1.979466e-03
0.162631839515	2.543874e-02	1.967121e-03
0.163138207764	2.106888e-02	1.962873e-03
0.163644573469	2.619512e-02	1.949545e-03
0.164150936619	2.432560e-02	1.959372e-03
0.164657297208	2.572814e-02	1.968033e-03
0.165163655227	2.473861e-02	1.931380e-03
0.165670010669	1.550088e-02	1.936205e-03
0.166176363526	1.856550e-02	1.930929e-03
0.16668271379	2.160094e-02	1.958540e-03
0.167189061453	1.945070e-02	1.946407e-03
0.167695406507	2.039612e-02	1.930127e-03
0.168201748944	2.223756e-02	1.936493e-03
0.168708088757	2.360486e-02	1.931378e-03
0.169214425937	1.939028e-02	1.939529e-03
0.169720760477	2.189428e-02	1.926482e-03
0.170227092369	2.385819e-02	1.926774e-03
0.170733421604	1.970997e-02	1.930242e-03
0.171239748176	1.914880e-02	1.920605e-03
0.171746072075	1.656791e-02	1.918353e-03
0.172252393295	2.613741e-02	1.909782e-03
0.172758711827	2.236098e-02	1.924255e-03
0.173265027664	2.243262e-02	1.927814e-03
0.173771340797	2.003963e-02	1.897502e-03
0.174277651219	2.116619e-02	1.910465e-03
0.174783958922	1.923525e-02	1.893756e-03
0.175290263898	1.225113e-02	1.907870e-03
0.175796566139	1.526755e-02	1.891660e-03
0.176302865637	1.533322e-02	1.900048e-03
0.176809162385	1.802066e-02	1.902943e-03
0.177315456374	1.611346e-02	1.884658e-03
0.177821747597	1.955994e-02	1.899676e-03
0.178328036045	1.696883e-02	1.890080e-03
0.178834321711	1.568279e-02	1.874411e-03
0.179340604587	1.476156e-02	1.893458e-03
0.179846884666	1.802866e-02	1.877159e-03
0.180353161938	1.349814e-02	1.891225e-03
0.180859436397	1.279854e-02	1.865768e-03
0.181365708035	1.811128e-02	1.880512e-03
0.181871976843	1.561546e-02	1.890584e-03
0.182378242814	1.837435e-02	1.915470e-03
0.182884505939	1.407886e-02	1.972356e-03
0.183390766212	1.862715e-02	1.972530e-03
0.183897023624	1.473040e-02	2.025101e-03
0.184403278167	1.156384e-02	2.012435e-03
0.184909529833	1.255687e-02	1.954063e-03
0.185415778615	1.002410e-02	1.928718e-03
0.185922024505	1.792365e-02	1.903866e-03
0.186428267494	1.555872e-02	1.892802e-03
0.186934507575	1.392334e-02	1.889952e-03
0.18744074474	1.436992e-02	1.879600e-03
0.187946978982	1.514647e-02	1.888332e-03
0.188453210291	1.511172e-02	1.871553e-03
0.188959438661	1.349907e-02	1.879148e-03
0.189465664084	1.103095e-02	1.852140e-03
0.189971886551	1.145159e-02	1.869982e-03
0.190478106055	1.298955e-02	1.860405e-03
0.190984322588	1.075005e-02	1.854441e-03
0.191490536143	1.189985e-02	1.862348e-03
0.19199674671	1.145763e-02	1.846027e-03
0.192502954283	1.387141e-02	1.859104e-03
0.193009158853	1.367887e-02	1.847135e-03
0.193515360412	1.380189e-02	1.845679e-03
0.194021558954	1.289045e-02	1.844344e-03
0.194527754469	1.321007e-02	1.839393e-03
0.195033946951	7.778963e-03	1.838291e-03
0.19554013639	1.282773e-02	1.833316e-03
0.19604632278	9.883253e-03	1.830107e-03
0.196552506112	1.015646e-02	1.836010e-03
0.197058686379	1.120591e-02	1.825919e-03
0.197564863572	1.139760e-02	1.831329e-03
0.198071037684	1.028921e-02	1.812667e-03
0.198577208707	1.181838e-02	1.834316e-03
0.199083376633	1.298598e-02	1.824226e-03
0.199589541455	1.188209e-02	1.810263e-03
0.200095703163	1.065370e-02	1.825220e-03
0.200601861752	8.748033e-03	1.799882e-03
0.201108017212	9.175108e-03	1.828191e-03
0.201614169535	9.437147e-03	1.796753e-03
0.202120318715	1.020810e-02	1.807978e-03
0.202626464742	9.296647e-03	1.807874e-03
0.20313260761	9.557617e-03	1.798186e-03
0.20363874731	1.169202e-02	1.804985e-03
0.204144883835	8.445879e-03	1.788034e-03
0.204651017176	1.020730e-02	1.808812e-03
0.205157147326	1.140171e-02	1.794298e-03
0.205663274276	9.554950e-03	1.786076e-03
0.20616939802	1.276898e-02	1.804255e-03
0.206675518549	7.410069e-03	1.764341e-03
0.207181635855	6.706603e-03	1.799049e-03
0.207687749931	9.614970e-03	1.785138e-03
0.208193860768	9.004179e-03	1.777144e-03
0.208699968359	6.103476e-03	1.786404e-03
0.209206072695	1.341929e-02	1.770752e-03
0.20971217377	5.997301e-03	1.782582e-03
0.210218271575	1.094808e-02	1.752335e-03
0.210724366102	5.677856e-03	1.769554e-03
0.211230457344	6.268435e-03	1.758791e-03
0.211736545292	7.353888e-03	1.753579e-03
0.212242629939	8.868619e-03	1.768462e-03
0.212748711276	7.682036e-03	1.750360e-03
0.213254789297	9.617906e-03	1.752887e-03
0.213760863993	8.775956e-03	1.755558e-03
0.214266935356	7.706791e-03	1.745102e-03
0.214773003379	6.296350e-03	1.765728e-03
0.215279068053	8.993668e-03	1.737149e-03
0.215785129371	9.690518e-03	1.753259e-03
0.216291187324	9.575356e-03	1.754436e-03
0.216797241906	5.510423e-03	1.745668e-03
0.217303293108	8.065366e-03	1.759208e-03
0.217809340922	6.059006e-03	1.746123e-03
0.218315385341	3.412785e-03	1.746984e-03
0.218821426356	4.416176e-03	1.735485e-03
0.21932746396	6.596199e-03	1.739224e-03
0.219833498145	7.538188e-03	1.742119e-03
0.220339528903	5.944440e-03	1.743003e-03
0.220845556226	7.557131e-03	1.744273e-03
0.221351580106	8.892864e-03	1.727335e-03
0.221857600536	3.556151e-03	1.737203e-03
0.222363617508	6.266858e-03	1.724682e-03
0.222869631013	7.380806e-03	1.732092e-03
0.223375641045	7.380899e-03	1.737291e-03
0.223881647594	3.757188e-03	1.718448e-03
0.224387650654	8.576101e-03	1.736525e-03
0.224893650216	8.441312e-03	1.719149e-03
0.225399646272	6.210213e-03	1.723918e-03
0.225905638815	5.623583e-03	1.722180e-03
0.226411627838	6.242657e-03	1.718215e-03
0.226917613331	4.226748e-03	1.721783e-03
0.227423595287	5.690603e-03	1.708694e-03
0.227929573698	3.504998e-03	1.710864e-03
0.228435548557	5.125147e-03	1.713691e-03
0.228941519856	3.484912e-03	1.708064e-03
0.229447487586	3.393614e-03	1.715735e-03
0.229953451741	4.915474e-03	1.697482e-03
0.230459412311	4.860187e-03	1.713771e-03
0.23096536929	7.446788e-03	1.706131e-03
0.231471322669	5.863961e-03	1.694051e-03
0.23197727244	3.352508e-03	1.700787e-03
0.232483218596	5.030524e-03	1.693309e-03
0.232989161129	5.481088e-03	1.712207e-03
0.233495100031	5.354312e-03	1.694195e-03
0.234001035294	4.175919e-03	1.695313e-03
0.234506966911	7.188692e-03	1.692653e-03
0.235012894873	4.482094e-03	1.690776e-03
0.235518819172	8.324227e-03	1.704090e-03
0.236024739802	6.115876e-03	1.685452e-03
0.236530656753	4.413128e-03	1.688999e-03
0.237036570019	5.684320e-03	1.683484e-03
0.23754247959	3.844851e-03	1.683684e-03
0.23804838546	7.469265e-03	1.689561e-03
0.238554287621	1.663689e-03	1.671899e-03
0.239060186065	5.751987e-03	1.689144e-03
0.239566080783	2.996452e-03	1.673369e-03
0.240071971768	5.903936e-03	1.674827e-03
0.240577859013	4.432746e-03	1.674891e-03
0.241083742509	6.590820e-03	1.677367e-03
0.241589622248	7.886045e-03	1.690982e-03
0.242095498224	1.250715e-03	1.666274e-03
0.242601370427	4.236005e-03	1.671436e-03
0.24310723885	2.628325e-03	1.719867e-03
0.243613103485	4.012509e-03	1.748421e-03
0.244118964325	2.432255e-03	1.778511e-03
0.244624821361	5.412898e-03	1.771571e-03
0.245130674586	2.915255e-03	1.811917e-03
0.245636523992	5.115620e-03	1.805894e-03
0.246142369571	2.010692e-03	1.834827e-03
0.246648211315	2.633148e-03	1.828288e-03
0.247154049216	2.870073e-03	1.840829e-03
0.247659883267	1.494008e-03	1.866109e-03
0.248165713459	5.455792e-03	1.865218e-03
0.248671539786	4.956862e-03	1.880822e-03
0.249177362238	4.345156e-03	1.891911e-03
0.249683180808	6.754916e-03	1.902453e-03
0.250188995489	-3.392013e-04	1.911766e-03
0.250694806273	6.103751e-03	1.913910e-03
0.251200613151	3.657053e-03	1.929109e-03
0.251706416116	4.867049e-03	1.925921e-03
0.25221221516	1.024406e-03	1.950377e-03
0.252718010275	5.082345e-03	1.867585e-03
0.253223801453	2.428866e-03	1.835312e-03
0.253729588687	3.797285e-03	1.834263e-03
0.254235371969	2.836570e-03	1.812427e-03
0.25474115129	4.586396e-03	1.810054e-03
0.255246926644	3.064065e-03	1.785125e-03
0.255752698022	4.836468e-03	1.772670e-03
0.256258465416	5.395756e-03	1.772301e-03
0.256764228818	4.119337e-03	1.754731e-03
0.257269988222	2.565202e-03	1.754066e-03
0.257775743618	3.489119e-03	1.734398e-03
0.258281495	1.943299e-03	1.716851e-03
0.258787242358	6.355380e-03	1.737403e-03
0.259292985686	6.022439e-03	1.707750e-03
0.259798724976	5.281917e-03	1.718137e-03
0.260304460219	3.463567e-03	1.692829e-03
0.260810191409	3.102165e-03	1.700335e-03
0.261315918536	2.138981e-03	1.691381e-03
0.261821641594	6.277984e-03	1.676104e-03
0.262327360574	4.548373e-03	1.682033e-03
0.262833075469	1.696541e-03	1.664929e-03
0.26333878627	2.100567e-03	1.673831e-03
0.263844492971	1.589674e-03	1.654418e-03
0.264350195563	3.096489e-03	1.645644e-03
0.264855894038	1.457865e-03	1.658921e-03
0.265361588389	-1.263854e-03	1.643276e-03
0.265867278607	3.097214e-03	1.649607e-03
0.266372964685	4.678998e-03	1.645800e-03
0.266878646616	1.534612e-03	1.648609e-03
0.26738432439	1.714697e-03	1.643508e-03
0.267889998001	1.874611e-03	1.635127e-03
0.268395667441	4.337586e-03	1.639567e-03
0.268901332701	3.699638e-03	1.631706e-03
0.269406993774	3.890295e-03	1.640146e-03
0.269912650653	6.283732e-03	1.638167e-03
0.270418303329	2.029563e-04	1.632188e-03
0.270923951794	3.236267e-03	1.630274e-03
0.271429596041	2.283525e-03	1.618881e-03
0.271935236062	4.959149e-03	1.631977e-03
0.272440871849	4.252490e-03	1.626057e-03
0.272946503394	4.326315e-03	1.623731e-03
0.27345213069	4.790355e-03	1.625027e-03
0.273957753728	4.818227e-03	1.617222e-03
0.274463372501	3.778722e-03	1.624135e-03
0.274968987001	2.917355e-03	1.617595e-03
0.27547459722	2.960857e-03	1.614593e-03
0.275980203151	2.158509e-03	1.612139e-03
0.276485804785	4.928305e-03	1.614234e-03
0.276991402114	2.250301e-03	1.615015e-03
0.277496995132	1.776355e-03	1.599387e-03
0.27800258383	2.468215e-03	1.605333e-03
0.2785081682	5.335835e-03	1.608207e-03
0.279013748234	6.105496e-03	1.611944e-03
0.279519323926	4.413498e-03	1.610528e-03
0.280024895266	7.369786e-03	1.589189e-03
0.280530462247	2.638596e-03	1.610074e-03
0.281036024861	5.914355e-03	1.590694e-03
0.281541583101	3.128358e-03	1.603768e-03
0.282047136958	1.865613e-03	1.596632e-03
0.282552686425	3.930996e-03	1.590616e-03
0.283058231494	3.810728e-03	1.601347e-03
0.283563772158	3.299179e-04	1.576088e-03
0.284069308407	4.390436e-05	1.592620e-03
0.284574840236	4.679787e-03	1.590931e-03
0.285080367635	3.189557e-03	1.585498e-03
0.285585890597	3.002670e-03	1.592917e-03
0.286091409114	3.496471e-03	1.574533e-03
0.286596923178	1.974978e-03	1.589930e-03
0.287102432782	3.797524e-03	1.575059e-03
0.287607937918	3.915928e-03	1.581448e-03
0.288113438578	5.647775e-04	1.578710e-03
0.288618934753	6.298905e-03	1.573833e-03
0.289124426438	1.917975e-03	1.580068e-03
0.289629913622	5.488550e-03	1.568265e-03
0.2901353963	1.218242e-03	1.574903e-03
0.290640874462	1.845658e-03	1.575241e-03
0.291146348101	3.478464e-03	1.574397e-03
0.29165181721	1.611167e-03	1.576700e-03
0.29215728178	5.150079e-03	1.558744e-03
0.292662741804	4.247396e-03	1.568922e-03
0.293168197274	1.468444e-03	1.562883e-03
0.293673648182	2.203274e-03	1.563133e-03
0.29417909452	3.189782e-03	1.574689e-03
0.29468453628	2.119531e-03	1.549466e-03
0.295189973456	5.792732e-03	1.571342e-03
0.295695406038	1.192798e-03	1.552216e-03
0.296200834019	2.896597e-04	1.556603e-03
0.296706257392	4.007396e-03	1.558393e-03
0.297211676148	2.475404e-03	1.553643e-03
0.29771709028	4.046053e-03	1.563116e-03
0.29822249978	3.207278e-03	1.550019e-03
0.29872790464	4.116860e-03	1.553660e-03
0.299233304852	2.723132e-03	1.550214e-03
0.299738700409	3.687662e-03	1.552806e-03
0.300244091303	2.734493e-03	1.555235e-03
0.300749477525	6.131223e-04	1.538799e-03
0.301254859069	2.560107e-03	1.547944e-03
0.301760235926	5.720205e-04	1.540055e-03
0.302265608088	2.194805e-03	1.542467e-03
0.302770975549	4.379697e-03	1.548518e-03
0.303276338299	3.103092e-03	1.535535e-03
0.303781696331	4.842376e-03	1.548545e-03
0.304287049638	2.000185e-03	1.529446e-03
0.304792398212	3.875758e-03	1.536799e-03
0.305297742044	4.322043e-03	1.529452e-03
0.305803081127	5.370506e-03	1.529467e-03
0.306308415454	2.730908e-03	1.541124e-03
0.306813745016	4.970498e-03	1.522770e-03
0.307319069805	3.417716e-03	1.531198e-03
0.307824389815	4.180528e-03	1.524472e-03
0.308329705036	4.180156e-03	1.534190e-03
0.308835015462	5.389320e-03	1.523264e-03
0.309340321084	-8.646678e-04	1.509877e-03
0.309845621895	5.381106e-04	1.528051e-03
0.310350917887	3.844325e-03	1.522330e-03
0.310856209052	2.476261e-03	1.520864e-03
0.311361495383	4.812563e-03	1.525441e-03
0.311866776871	5.682928e-03	1.518264e-03
0.312372053508	3.664145e-03	1.525554e-03
0.312877325288	3.528814e-03	1.510224e-03
0.313382592202	2.359654e-03	1.525457e-03
0.313887854243	3.248948e-03	1.511752e-03
0.314393111402	2.514566e-03	1.519276e-03
0.314898363672	6.861104e-03	1.523847e-03
0.315403611044	3.899079e-03	1.508395e-03
0.315908853513	4.417508e-03	1.521388e-03
0.316414091069	1.163627e-03	1.511899e-03
0.316919323704	2.931449e-03	1.509805e-03
0.317424551412	1.990588e-03	1.512670e-03
0.317929774183	1.051011e-03	1.501741e-03
0.318434992011	3.304449e-03	1.509837e-03
0.318940204888	2.917354e-03	1.508352e-03
0.319445412806	2.403153e-03	1.504165e-03
0.319950615756	4.532640e-03	1.503083e-03
0.320455813732	3.253165e-03	1.506256e-03
0.320961006725	3.450031e-03	1.507380e-03
0.321466194728	4.705714e-03	1.495450e-03
0.321971377733	3.244890e-03	1.501332e-03
0.322476555733	2.432939e-03	1.496434e-03
0.322981728718	3.969554e-03	1.503356e-03
0.323486896682	3.372367e-03	1.502128e-03
0.323992059618	3.967911e-03	1.493034e-03
0.324497217516	4.655502e-03	1.492401e-03
0.325002370369	5.551876e-03	1.492516e-03
0.32550751817	1.291002e-03	1.497798e-03
0.326012660911	4.507676e-03	1.491796e-03
0.326517798584	3.971213e-03	1.492895e-03
0.327022931181	5.247730e-03	1.492015e-03
0.327528058694	8.156188e-04	1.485107e-03
0.328033181116	2.905197e-03	1.492635e-03
0.328538298439	3.035993e-03	1.481617e-03
0.329043410655	3.832768e-03	1.483449e-03
0.329548517756	2.797497e-03	1.491567e-03
0.330053619735	2.465524e-03	1.473457e-03
0.330558716584	4.568016e-03	1.487616e-03
0.331063808295	4.629209e-03	1.471732e-03
0.33156889486	3.680960e-03	1.488141e-03
0.332073976272	1.020677e-03	1.481112e-03
0.332579052522	3.068632e-04	1.474769e-03
0.333084123604	1.337772e-03	1.479928e-03
0.333589189508	2.851119e-03	1.470289e-03
0.334094250228	3.680511e-03	1.478999e-03
0.334599305756	2.461354e-03	1.473133e-03
0.335104356084	3.679990e-03	1.471648e-03
0.335609401204	3.147366e-03	1.481691e-03
0.336114441108	6.995755e-05	1.463294e-03
0.336619475789	4.501723e-03	1.473387e-03
0.337124505238	7.906359e-04	1.460040e-03
0.337629529449	3.626300e-03	1.466942e-03
0.338134548413	4.077419e-03	1.476873e-03
0.338639562123	5.550663e-03	1.463126e-03
0.339144570571	2.589576e-04	1.467568e-03
0.339649573748	1.176572e-03	1.459757e-03
0.340154571648	5.597625e-03	1.467456e-03
0.340659564263	2.837747e-03	1.465273e-03
0.341164551584	1.922074e-03	1.462304e-03
0.341669533604	4.777362e-03	1.461220e-03
0.342174510315	4.115350e-03	1.458733e-03
0.34267948171	2.860901e-03	1.461013e-03
0.343184447781	3.740932e-03	1.455984e-03
0.34368940852	2.368870e-03	1.452742e-03
0.344194363919	3.751457e-03	1.458135e-03
0.34469931397	1.394546e-03	1.455924e-03
0.345204258666	3.672100e-03	1.453383e-03
0.345709198	6.185591e-03	1.452439e-03
0.346214131962	1.396953e-03	1.452041e-03
0.346719060546	4.543243e-03	1.453814e-03
0.347223983743	2.325442e-05	1.448806e-03
0.347728901547	2.355962e-03	1.448239e-03
0.348233813948	5.127079e-03	1.453906e-03
0.34873872094	2.891047e-03	1.444055e-03
0.349243622515	1.566633e-03	1.447472e-03
0.349748518665	5.611816e-03	1.442900e-03
0.350253409382	2.398387e-03	1.441041e-03
0.350758294658	5.869800e-03	1.446543e-03
0.351263174486	4.384459e-03	1.444422e-03
0.351768048858	3.793871e-03	1.447133e-03
0.352272917766	3.467752e-03	1.435041e-03
0.352777781203	5.589073e-03	1.445084e-03
0.35328263916	4.064670e-03	1.443708e-03
0.353787491631	3.679020e-03	1.432327e-03
0.354292338606	3.636204e-03	1.436533e-03
0.354797180079	1.673109e-03	1.437508e-03
0.355302016042	2.631699e-03	1.436598e-03
0.355806846487	6.142812e-03	1.435936e-03
0.356311671405	5.171562e-03	1.435865e-03
0.356816490791	3.923407e-03	1.432467e-03
0.357321304635	1.457331e-03	1.437285e-03
0.35782611293	2.701569e-03	1.425115e-03
0.358330915668	3.873253e-03	1.433026e-03
0.358835712842	3.891293e-03	1.430151e-03
0.359340504444	3.855195e-03	1.426463e-03
0.359845290465	1.653062e-03	1.431132e-03
0.360350070899	2.288983e-03	1.423239e-03
0.360854845738	4.112248e-03	1.428339e-03
0.361359614973	1.718053e-03	1.423984e-03
0.361864378597	4.110337e-03	1.425284e-03
0.362369136603	2.737459e-03	1.429479e-03
0.362873888982	4.316745e-03	1.413501e-03
0.363378635727	4.421880e-03	1.429894e-03
0.363883376831	2.049392e-03	1.419263e-03
0.364388112284	4.255536e-03	1.423462e-03
0.36489284208	5.634178e-04	1.422760e-03
0.365397566212	3.961748e-03	1.409875e-03
0.36590228467	2.747694e-03	1.426415e-03
0.366406997448	4.244666e-03	1.409319e-03
0.366911704537	4.441430e-03	1.417323e-03
0.36741640593	-5.842602e-04	1.414546e-03
0.36792110162	3.255655e-03	1.410642e-03
0.368425791598	2.269330e-03	1.420297e-03
0.368930475857	5.747178e-04	1.406454e-03
0.369435154389	3.181472e-03	1.415113e-03
0.369939827186	5.046504e-03	1.409956e-03
0.370444494241	2.732891e-03	1.408917e-03
0.370949155545	5.295567e-03	1.418972e-03
0.371453811092	4.975902e-03	1.403666e-03
0.371958460873	2.654520e-03	1.410201e-03
0.372463104881	3.413271e-03	1.411360e-03
0.372967743108	2.971967e-03	1.405937e-03
0.373472375546	1.547269e-03	1.408656e-03
0.373977002187	1.665731e-03	1.396888e-03
0.374481623024	3.604731e-03	1.405649e-03
0.374986238049	3.613353e-03	1.403657e-03
0.375490847255	4.565255e-03	1.402091e-03
0.375995450633	2.562739e-03	1.400563e-03
0.376500048176	5.723667e-03	1.407199e-03
0.377004639876	3.607070e-03	1.403197e-03
0.377509225725	1.816568e-03	1.396678e-03
0.378013805716	1.165823e-03	1.398217e-03
0.378518379841	3.449161e-03	1.394841e-03
0.379022948092	1.957458e-03	1.398004e-03
0.379527510462	2.410345e-03	1.398653e-03
0.380032066942	1.704975e-03	1.391117e-03
0.380536617526	3.291357e-03	1.399256e-03
0.381041162205	4.420293e-03	1.397530e-03
0.381545700971	2.642343e-03	1.398474e-03
0.382050233818	2.056155e-03	1.435006e-03
0.382554760736	2.771451e-03	1.451933e-03
0.383059281719	2.198044e-03	1.473609e-03
0.383563796759	1.549880e-03	1.467326e-03
0.384068305848	5.078402e-03	1.496655e-03
0.384572808978	1.912211e-03	1.497450e-03
0.385077306142	1.917652e-03	1.511234e-03
0.385581797332	3.272241e-03	1.524300e-03
0.38608628254	1.317430e-03	1.515976e-03
0.386590761758	2.357251e-03	1.529255e-03
0.387095234979	5.751367e-03	1.538207e-03
0.387599702195	2.229381e-03	1.553706e-03
0.388104163398	1.368662e-03	1.561884e-03
0.388608618582	2.799579e-03	1.548678e-03
0.389113067736	3.592860e-03	1.581262e-03
0.389617510856	4.719331e-03	1.570126e-03
0.390121947931	1.302592e-03	1.577198e-03
0.390626378955	1.334066e-03	1.571868e-03
0.391130803921	-6.252268e-04	1.581560e-03
0.39163522282	8.568553e-04	1.530799e-03
0.392139635644	2.609307e-03	1.501450e-03
0.392644042386	3.865497e-03	1.502801e-03
0.393148443039	2.187582e-03	1.477107e-03
0.393652837594	2.846017e-03	1.479795e-03
0.394157226044	3.401963e-03	1.470361e-03
0.394661608381	-9.688179e-05	1.453966e-03
0.395165984597	4.189008e-03	1.450161e-03
0.395670354685	4.016670e-03	1.438792e-03
0.396174718637	2.463847e-03	1.439767e-03
0.396679076446	2.235922e-03	1.435995e-03
0.397183428102	3.050717e-03	1.423355e-03
0.3976877736	-1.009163e-03	1.426911e-03
0.398192112931	1.823380e-03	1.412476e-03
0.398696446088	2.974756e-03	1.413673e-03
0.399200773062	2.827635e-03	1.404646e-03
0.399705093846	3.937174e-03	1.409782e-03
0.400209408433	6.557911e-03	1.417549e-03
0.400713716814	3.312187e-03	1.396194e-03
0.401218018983	3.348401e-03	1.407955e-03
0.40172231493	-7.432984e-05	1.395458e-03
0.40222660465	4.664163e-03	1.402479e-03
0.402730888133	3.676635e-03	1.401700e-03
0.403235165372	2.646438e-03	1.394428e-03
0.40373943636	2.637263e-03	1.400546e-03
0.404243701089	2.799783e-03	1.389211e-03
0.40474795955	4.467731e-03	1.398649e-03
0.405252211737	1.644053e-03	1.394023e-03
0.405756457642	1.502642e-03	1.386823e-03
0.406260697257	1.359288e-03	1.398982e-03
0.406764930574	1.410344e-03	1.386542e-03
0.407269157586	3.499698e-03	1.386034e-03
0.407773378285	3.449081e-03	1.383680e-03
0.408277592663	1.573310e-03	1.384786e-03
0.408781800713	4.376074e-03	1.396256e-03
0.409286002426	2.169022e-03	1.380574e-03
0.409790197796	1.627309e-03	1.382427e-03
0.410294386814	5.917615e-03	1.378819e-03
0.410798569473	2.493769e-03	1.383243e-03
0.411302745766	1.993543e-03	1.378169e-03
0.411806915683	5.435682e-03	1.380122e-03
0.412311079219	3.796322e-03	1.380893e-03
0.412815236364	2.912477e-03	1.376523e-03
0.413319387112	1.224342e-03	1.380486e-03
0.413823531454	2.487186e-03	1.372230e-03
0.414327669384	8.425200e-04	1.369274e-03
0.414831800893	2.427113e-03	1.380652e-03
0.415335925973	4.526338e-03	1.364718e-03
0.415840044618	2.440888e-03	1.378151e-03
0.416344156818	4.997004e-03	1.368720e-03
0.416848262568	4.378680e-03	1.369000e-03
0.417352361858	2.647374e-03	1.370700e-03
0.417856454682	3.664408e-03	1.365728e-03
0.418360541031	2.523176e-03	1.373295e-03
0.418864620898	1.855329e-03	1.362591e-03
0.419368694275	2.747725e-03	1.368788e-03
0.419872761155	3.107156e-03	1.363408e-03
0.420376821529	1.920768e-03	1.362845e-03
0.420880875391	3.992345e-03	1.367304e-03
0.421384922732	3.461867e-03	1.361311e-03
0.421888963545	3.323307e-03	1.363766e-03
0.422392997823	3.056539e-03	1.362340e-03
0.422897025556	3.263941e-03	1.356388e-03
0.423401046739	4.399742e-03	1.361282e-03
0.423905061362	2.232881e-03	1.351906e-03
0.424409069419	5.124973e-03	1.360429e-03
0.424913070902	2.820307e-03	1.350196e-03
0.425417065803	3.862653e-03	1.356168e-03
0.425921054115	2.518215e-03	1.354440e-03
0.426425035829	2.498439e-03	1.353701e-03
0.426929010938	2.380442e-03	1.351399e-03
0.427432979435	2.791421e-03	1.344182e-03
0.427936941311	1.989440e-03	1.350495e-03
0.42844089656	2.103467e-03	1.347837e-03
0.428944845173	2.115791e-03	1.349958e-03
0.429448787143	2.114394e-03	1.343312e-03
0.429952722462	6.200353e-03	1.342303e-03
0.430456651122	1.660201e-03	1.352663e-03
0.430960573116	1.452092e-03	1.344266e-03
0.431464488436	2.461557e-03	1.342138e-03
0.431968397075	4.810493e-03	1.346331e-03
0.432472299024	6.810507e-03	1.348940e-03
0.432976194277	2.616268e-03	1.350353e-03
0.433480082824	4.633228e-03	1.334737e-03
0.43398396466	9.059369e-04	1.346949e-03
0.434487839776	2.779631e-03	1.343331e-03
0.434991708164	1.547368e-03	1.344248e-03
0.435495569817	1.464609e-03	1.343826e-03
0.435999424728	2.773344e-03	1.332113e-03
0.436503272887	2.821781e-03	1.345537e-03
0.437007114289	1.416223e-03	1.336125e-03
0.437510948925	1.658890e-03	1.340221e-03
0.438014776787	1.901814e-03	1.342744e-03
0.438518597868	2.284397e-03	1.332675e-03
0.439022412161	3.839736e-03	1.339537e-03
0.439526219657	3.158166e-03	1.333897e-03
0.440030020348	-1.679268e-03	1.331605e-03
0.440533814228	4.109600e-03	1.336690e-03
0.441037601289	4.203741e-03	1.333145e-03
0.441541381523	1.756971e-03	1.336316e-03
0.442045154921	1.412846e-03	1.326458e-03
0.442548921478	1.038888e-03	1.331939e-03
0.443052681184	3.474810e-03	1.334469e-03
0.443556434033	2.078979e-03	1.330963e-03
0.444060180017	1.277549e-03	1.331124e-03
0.444563919127	1.765735e-03	1.342368e-03
0.445067651357	1.284109e-03	1.380269e-03
0.445571376699	2.051642e-03	1.374175e-03
0.446075095145	2.428353e-03	1.388563e-03
0.446578806687	5.349093e-03	1.387153e-03
0.447082511318	2.306973e-03	1.400687e-03
0.44758620903	3.942592e-03	1.403037e-03
0.448089899816	4.912891e-03	1.400464e-03
0.448593583667	3.328452e-03	1.406707e-03
0.449097260577	4.068313e-03	1.407167e-03
0.449600930537	1.999570e-03	1.411830e-03
0.450104593541	1.340348e-03	1.422440e-03
0.450608249579	2.246195e-03	1.408892e-03
0.451111898645	3.641819e-03	1.427691e-03
0.451615540732	2.687465e-04	1.412553e-03
0.45211917583	9.347515e-04	1.428207e-03
0.452622803934	3.600556e-03	1.430634e-03
0.453126425034	1.882618e-03	1.431056e-03
0.453630039124	3.231205e-03	1.441527e-03
0.454133646196	3.150972e-03	1.425223e-03
0.454637246242	2.891650e-03	1.439594e-03
0.455140839254	3.482616e-03	1.436713e-03
0.455644425226	1.801497e-03	1.442672e-03
0.456148004149	4.828158e-03	1.448069e-03
0.456651576015	3.404500e-03	1.436785e-03
0.457155140817	3.383309e-03	1.439805e-03
0.457658698548	2.219061e-03	1.442740e-03
0.458162249199	3.289185e-03	1.436413e-03
0.458665792764	1.679596e-03	1.445084e-03
0.459169329234	2.825998e-03	1.434731e-03
0.459672858602	2.137568e-03	1.448791e-03
0.46017638086	2.964003e-03	1.438447e-03
0.460679896001	4.105732e-03	1.449378e-03
0.461183404017	9.520138e-04	1.440263e-03
0.4616869049	3.912874e-03	1.448736e-03
0.462190398643	7.667338e-04	1.457385e-03
0.462693885238	3.786559e-03	1.443805e-03
0.463197364677	3.810637e-03	1.456562e-03
0.463700836953	2.801532e-03	1.450810e-03
0.464204302059	6.226653e-04	1.452714e-03
0.464707759986	2.531570e-03	1.454254e-03
0.465211210726	3.695614e-03	1.453029e-03
0.465714654274	3.647009e-03	1.465563e-03
0.46621809062	8.116751e-04	1.448646e-03
0.466721519757	1.710322e-03	1.467655e-03
0.467224941677	2.308137e-03	1.460642e-03
0.467728356374	1.430657e-03	1.457735e-03
0.468231763839	3.048234e-03	1.472868e-03
0.468735164064	5.176050e-03	1.461669e-03
0.469238557042	2.952997e-03	1.472365e-03
0.469741942766	4.304098e-03	1.460962e-03
0.470245321227	5.715414e-03	1.471748e-03
0.470748692419	2.540691e-03	1.481037e-03
0.471252056333	2.223076e-03	1.459980e-03
0.471755412962	4.810555e-03	1.478794e-03
0.472258762298	3.102386e-03	1.465409e-03
0.472762104334	4.145366e-03	1.480523e-03
0.473265439063	2.741225e-03	1.476176e-03
0.473768766475	1.747272e-03	1.470436e-03
0.474272086565	-9.555446e-04	1.479852e-03
0.474775399323	3.555043e-03	1.479294e-03
0.475278704744	6.179228e-03	1.483621e-03
0.475782002818	2.104709e-03	1.484685e-03
0.476285293539	2.213273e-03	1.472338e-03
0.476788576898	1.710884e-03	1.486196e-03
0.477291852889	3.221401e-03	1.478226e-03
0.477795121503	1.489985e-03	1.488295e-03
0.478298382733	4.091519e-03	1.483645e-03
0.478801636572	3.990391e-03	1.488907e-03
0.479304883011	1.539144e-03	1.494727e-03
0.479808122044	4.365012e-03	1.479640e-03
0.480311353662	1.845604e-03	1.485593e-03
0.480814577858	1.140589e-03	1.488657e-03
0.481317794625	4.641144e-03	1.498522e-03
0.481821003954	5.004043e-03	1.491901e-03
0.482324205838	3.688358e-03	1.487432e-03
0.48282740027	1.813364e-03	1.499581e-03
0.483330587242	2.208037e-03	1.487316e-03
0.483833766746	3.120570e-03	1.502694e-03
0.484336938775	2.724898e-03	1.490989e-03
0.484840103321	4.276971e-03	1.496921e-03
0.485343260377	2.031817e-03	1.510786e-03
0.485846409934	5.390511e-03	1.482920e-03
0.486349551986	3.339406e-03	1.513079e-03
0.486852686525	9.375092e-04	1.490868e-03
0.487355813543	5.056054e-03	1.510649e-03
0.487858933032	1.827627e-03	1.507611e-03
0.488362044986	1.134812e-03	1.488309e-03
0.488865149396	5.766763e-03	1.511794e-03
0.489368246254	3.632459e-03	1.497981e-03
0.489871335554	3.386403e-03	1.512766e-03
0.490374417287	2.572777e-03	1.506723e-03
0.490877491447	3.260821e-03	1.499941e-03
0.491380558025	4.177775e-03	1.519532e-03
0.491883617014	2.462481e-03	1.501546e-03
0.492386668406	3.329913e-03	1.511904e-03
0.492889712193	3.570387e-03	1.507605e-03
0.493392748369	3.181455e-03	1.506554e-03
0.493895776925	-1.151872e-03	1.523482e-03
0.494398797854	2.187066e-03	1.500846e-03
0.494901811149	4.527745e-03	1.521712e-03
0.495404816801	5.666930e-03	1.505781e-03
0.495907814803	5.595849e-03	1.518161e-03
0.496410805148	1.762164e-03	1.519342e-03
0.496913787828	-1.874791e-04	1.510211e-03
0.497416762836	1.678177e-03	1.522296e-03
0.497919730163	2.741800e-03	1.514283e-03
0.498422689802	6.469612e-03	1.524174e-03
0.498925641746	1.168029e-03	1.513798e-03
0.499428585987	2.357038e-03	1.523022e-03
0.499931522518	3.046278e-03	1.527184e-03
0.500434451331	4.126190e-03	1.517732e-03
