# Supplementary material for: The cooperative binding of TDP-43 to GU-rich RNA repeats antagonizes TDP-43 aggregation
Source: eLife. 2021 Sep 7;10:e67605. doi: 10.7554/eLife.67605 (PMC8523171; doi:10.7554/eLife.67605)
Supplement: Figure 5—source data 2. [file elife-67605-fig5-data2.xlsx]

## Sheet: WT-K137E
Fluorescence intensity recorded along microtubules for the RFP and GFP channels (as described in Methods) and for indicated RFP- and GFP- tagged proteins .																Figure 5d
K137E-GFP		WT-RFP		K137E-GFP		WT-RFP		K137E-GFP		WT-RFP		K137E-GFP		WT-RFP
Pixel	Intensity	Pixel	Intensity	Pixel	Intensity	Pixel	Intensity	Pixel	Intensity	Pixel	Intensity	Pixel	Intensity	Pixel	Intensity
0	9779.45	0	10150	0	13757.2	0	13940.8	0	5640.92	0	7454.03	0	8481.32	0	9052.75
1	10662.3	1	14816.1	1	14156.2	1	15720.3	1	4277.07	1	5226.84	1	8556.77	1	8743.67
2	9349.98	2	12655.7	2	14115.9	2	17007.8	2	4422.15	2	6367.47	2	8393.02	2	7857.18
3	7664.04	3	10219.5	3	12204.1	3	14465.4	3	3621.46	3	3685.65	3	7529.68	3	8778.52
4	9378.84	4	12146.9	4	10834.3	4	14540.3	4	3297.69	4	3582.42	4	8403.77	4	9573.94
5	9443.07	5	12787.3	5	9807.03	5	13458.1	5	3145.81	5	4208.25	5	8338.72	5	9625.15
6	10559.2	6	12776.9	6	8831.84	6	11562.1	6	2461.71	6	4018.9	6	8619.22	6	11505.4
7	8823.42	7	8488.94	7	8981.05	7	12710.5	7	2203.18	7	3127.13	7	8707.13	7	10671
8	8278.54	8	8006.1	8	8788.48	8	12000.1	8	1893.2	8	1927.86	8	8082.35	8	8173.37
9	6554.69	9	6572.37	9	8891.97	9	13347	9	1634.33	9	1556.71	9	7393.26	9	6955.49
10	6888.77	10	8391.8	10	9354.24	10	12702.5	10	1813.33	10	1126.77	10	8745.47	10	9814.72
11	5088.2	11	5976.01	11	8946.75	11	11763.8	11	1197.19	11	891.467	11	7612.45	11	9268.7
12	4297.29	12	6282.88	12	8241.78	12	10185.7	12	1722.97	12	1338.32	12	9400.26	12	12618.6
13	3857.55	13	5585.72	13	8302.42	13	9359.94	13	1478.29	13	1490.8	13	8460.61	13	11167.3
14	3025.99	14	5073.33	14	7529.26	14	8188.36	14	1347.98	14	1952.39	14	10150.5	14	14886.5
15	2448.22	15	4515.4	15	7414.93	15	8551.76	15	1214.01	15	1916.15	15	10443.2	15	16267.2
16	1849.05	16	3940.48	16	6893.73	16	10152.7	16	1487.41	16	3156.57	16	10180.5	16	15441
17	1969.23	17	3071.82	17	6661.22	17	10222.3	17	2279.41	17	5274.79	17	9170.84	17	14138.4
18	1894.21	18	2408.2	18	6838.94	18	12704.5	18	1702.07	18	3497.89	18	13317.7	18	17501
19	1688.1	19	1105.69	19	7054.95	19	12360.1	19	2291.27	19	3523.87	19	13302.5	19	16147.7
20	1344.3	20	1080.9	20	5907.94	20	11255.2	20	1724.27	20	2626.2	20	14453.5	20	15853.4
21	1042.07	21	1736.71	21	5085.53	21	10131	21	2974.19	21	4604.48	21	13427.8	21	14548.1
22	1116.82	22	2248.81	22	4280.55	22	7892.36	22	3357.56	22	5506.25	22	11940	22	13150
23	2886.76	23	4984.19	23	2984.05	23	6147.91	23	3859.5	23	6191.11	23	11277	23	13565
24	4400.81	24	6047.11	24	5770.12	24	11710.1	24	4573.23	24	7514.01	24	10263.9	24	13531.3
25	4743.33	25	6615.27	25	5940.52	25	11340.4	25	5380.24	25	9549.8	25	10565.4	25	12945.2
26	4452.88	26	7305.15	26	7070.36	26	10561.3	26	6720.35	26	12272	26	9696.41	26	11009.8
27	5665.51	27	9271.66	27	8534.18	27	10325.8	27	7960.98	27	13305.7	27	9513.75	27	10584.1
28	7004.13	28	9108.82	28	8529.38	28	10119.5	28	7744.55	28	12540.2	28	8373.84	28	6957.36
29	6548.79	29	8260.86	29	9393.5	29	10166.5	29	7285.68	29	12283.9	29	8782.18	29	9913
30	6832.49	30	10081.7	30	8801.02	30	10721.1	30	6498.31	30	10508.4	30	7579.37	30	8434.34
31	6386.62	31	7364.44	31	8374.7	31	10462.7	31	6285.43	31	11641.5	31	6760.07	31	7464.3
32	4828.59	32	5123.66	32	8592.69	32	12164.1	32	6558.3	32	12185.2	32	5578.59	32	5578.15
33	4509.46	33	5171.33	33	8932.65	33	12179.1	33	5837.87	33	12554.8	33	5692.51	33	5540.35
34	4899.89	34	5237.23	34	9046.42	34	11172.6	34	5927.93	34	10881.1	34	4765.04	34	3780.1
35	5109.63	35	4823.18	35	8661.6	35	11570.1	35	5529.47	35	10218.2	35	4056.4	35	3278.3
36	4516.87	36	4137.1	36	9536.95	36	11634.1	36	7669.52	36	13480.8	36	3903.37	36	3815.06
37	4504.95	37	3751.31	37	8428.49	37	10025.7	37	5509.42	37	11432.2	37	4020.99	37	4294.68
38	4948.48	38	5197.28	38	7651.29	38	7978.38	38	6665.85	38	13094.3	38	4649.76	38	5971.19
39	6253.38	39	7273.24	39	8933.9	39	10094.3	39	6775.06	39	12897.3	39	4572.54	39	5506.89
40	7599.09	40	8070.61	40	8906.4	40	10684.7	40	6654.44	40	13525	40	4196.53	40	5308.58
41	8270.6	41	8537.74	41	9010.53	41	11310.5	41	7693.81	41	15280	41	5681.81	41	8227.13
42	8002.21	42	8158.15	42	11305.8	42	14320.8	42	6753.13	42	13199	42	4691.97	42	6349.8
43	8125.78	43	8283.48	43	13366.1	43	16560.8	43	10319.7	43	16035	43	5094.02	43	7215.89
44	9444.01	44	9731.66	44	13955.3	44	15558.9	44	12700.3	44	16253.9	44	6317	44	8741.97
45	10445.2	45	10513.3	45	13160.3	45	12037.2	45	12837.3	45	16752.6	45	5783.43	45	6864.28
46	10521.9	46	10717.2	46	11794.4	46	10388.6	46	13543.8	46	18616.5	46	6025.63	46	6285.78
47	10261.9	47	10884.4	47	10906	47	9564.78	47	12817.1	47	18874.2	47	7899.62	47	8566.39
48	9323.86	48	8480.9	48	9533.6	48	8924	48	12473.1	48	18767.5	48	8021.09	48	7456.11
49	8505.18	49	8572.04	49	8653.36	49	8570.28	49	11468.9	49	17090.4	49	7411.31	49	8750.89
50	10099.7	50	9351.94	50	7951.53	50	7981.31	50	11168.6	50	16911.9	50	9399.97	50	8605.8
51	9495.59	51	8625.56	51	6957.15	51	7387.69	51	10006.4	51	15462.1	51	8779.85	51	8178.34
52	9004.93	52	7725.38	52	6908.4	52	6912.01	52	10322	52	18496.2	52	9564.8	52	9051.61
53	9918.31	53	9919.43	53	6627.07	53	6436.39	53	8808.73	53	14971.2	53	8481.19	53	7298.26
54	10479.4	54	10521.6	54	6638.03	54	7485.44	54	8241.9	54	14925.1	54	8832.36	54	8063.57
55	8510.25	55	8437.93	55	9004.02	55	8359.61	55	6749.85	55	11625	55	9025.48	55	8333.42
56	8396.29	56	7407.52	56	8592.41	56	7868.23	56	6901.02	56	11391.9	56	7995.97	56	6289.24
57	8635.94	57	9638.42	57	7687.65	57	6812.8	57	7540.93	57	12840.3	57	8318.33	57	6741.18
58	8954.63	58	8568.74	58	7331.57	58	6564.37	58	7256.15	58	11267.4	58	7074.18	58	6573.18
59	9511.63	59	6693.94	59	6816.81	59	7454.19	59	7584.14	59	8869.18	59	6459.29	59	6402.4
60	10086.4	60	6455.86	60	6026.61	60	6844.59	60	8014.62	60	10139.1	60	6727.78	60	6272.97
61	9261.74	61	6262.73	61	5631.15	61	5850.42	61	9095.5	61	9754.78	61	7111.03	61	7181.13
62	8634.65	62	7262.9	62	4794.82	62	5331.08	62	8022.83	62	10460.6	62	7166.23	62	7277.73
63	8287.09	63	8774.71	63	5829.93	63	3928.85	63	8331.27	63	10169.5	63	6925.85	63	6850.3
64	7341.43	64	8752.89	64	6296.4	64	3051.22	64	8117.95	64	11036.9	64	6614.38	64	7053.23
65	7395.31	65	9685.64	65	7165.55	65	3408.21	65	8185.8	65	11817.6	65	6374.88	65	6188.19
66	6772.48	66	9770.38	66	8308.54	66	4840.98	66	9264.38	66	13582.9	66	5861.93	66	5532.8
67	6480.85	67	9484.89	67	9341.89	67	5960.48	67	9183.66	67	13173	67	5526.24	67	5031.63
68	7537.23	68	11583.9	68	10289.3	68	6963.53	68	9525.64	68	14490.7	68	6744.8	68	5364.64
69	7210.16	69	11132.2	69	11498.1	69	8961.36	69	8428.38	69	13362	69	8508.14	69	7831.73
70	9547.1	70	11352.3	70	11541.6	70	8730.09	70	9988.89	70	14724.9	70	8490.29	70	7329.8
71	9211.56	71	10538.7	71	11453	71	9517.18	71	8884.26	71	12213.4	71	8930.76	71	8650.17
72	9824.64	72	8870.98	72	11926	72	9188.84	72	8300.35	72	11148.3	72	9466.93	72	9576.76
73	8160.94	73	7375.13	73	11848.5	73	9992.84	73	8082.84	73	11276.2	73	7145.91	73	7877.38
74	9311.23	74	7772.24	74	11187	74	10204.8	74	7985.41	74	12323.9	74	7773.06	74	8929.76
75	7597.31	75	7113.87	75	10128.8	75	9556.44	75	8484.6	75	12520.7	75	6931.23	75	6952.61
76	7054.19	76	8147.73	76	10614.4	76	11782.6	76	8302.8	76	11821.7	76	7152.82	76	7429.11
77	8751.93	77	8586.95	77	8236.88	77	11810.1	77	8375.46	77	13085.5	77	9973.6	77	9047.38
78	10107.9	78	7867.7	78	9069.23	78	11027.8	78	8054.91	78	12787.3	78	9551.42	78	9535.43
79	9855.18	79	9757.58	79	11267.2	79	13970.5	79	7887.59	79	11777.4	79	11534	79	11807.9
80	9871.76	80	9380.24	80	12824	80	15526.4	80	7579.34	80	10929.7	80	11560.4	80	12885.7
81	9803.33	81	10123	81	12856.6	81	14300.6	81	7408.92	81	9467.2	81	11191.4	81	13756.8
82	9238.51	82	9528.13	82	13514	82	13024	82	7449.99	82	9461.49	82	10336.9	82	13668
83	8720.57	83	8847.42	83	12903.5	83	12536.6	83	7745.08	83	9737.4	83	9122.06	83	11554.4
84	8196.43	84	8526.77	84	12571.1	84	12213.3	84	7929.94	84	9681.38	84	7619.8	84	9900.08
85	7845.5	85	7797.68	85	12311	85	12569.8	85	7931.31	85	10421.9	85	6728.5	85	9048.8
86	8405.87	86	7602.34	86	13728.4	86	12160.9	86	7618.82	86	10150.9	86	6836.14	86	8742.56
87	9430.72	87	7822.22	87	13681.4	87	11141.1	87	7489.62	87	9392.66	87	6626.33	87	8444.78
88	8891.01	88	7694.84	88	18877.3	88	13562.1	88	7596.84	88	9852.2	88	9413.4	88	10036.2
89	8665.72	89	8352.51	89	16110.9	89	13598	89	8055.86	89	11128.3	89	9218.55	89	9547.56
90	8005.49	90	8717.84	90	13556.4	90	11913.8	90	7243.89	90	9371.51	90	9366.34	90	10399.4
91	8207.26	91	10959.9	91	13171.6	91	13173.2	91	6232.61	91	8514.8	91	10188.8	91	10775.1
92	8948.7	92	10378	92	13784.5	92	15504	92	5421.61	92	7238.64	92	11214.6	92	11579.8
93	9356.43	93	10364.6	93	14097.3	93	14593.4	93	6020.97	93	7122.35	93	12586	93	14283.1
94	9444.6	94	10027.5	94	14611.4	94	14763.8	94	5956.03	94	7266.17	94	14076.6	94	15157.8
95	9476.13	95	11422.2	95	11856.6	95	12356.1	95	5293.88	95	6375.2	95	14926.7	95	16022
96	10352.2	96	12787.1	96	12286.5	96	14725.4	96	4942.1	96	5818.02	96	14381.1	96	15198.5
97	12016.5	97	15815.3	97	9950.41	97	10652.8	97	5418.2	97	6096.71	97	13428.9	97	14428.1
98	13564.6	98	17119.8	98	10420.5	98	10999.5	98	4995.3	98	5601.17	98	14359.2	98	15471.9
99	14680.2	99	17242.5	99	10407.4	99	10191.7	99	4270.28	99	4416.57	99	13056.5	99	14360
100	14817.9	100	17627.1	100	10280.9	100	11089.4	100	5234.78	100	6225.77	100	12411	100	12337.8
101	17563	101	14675	101	10115.9	101	10827.9	101	4231.44	101	5450.64	101	11624.8	101	11721.3
102	19080	102	16100.5	102	9692.03	102	9696.92	102	3606.37	102	4773.02	102	11162.8	102	10183.9
103	16217.1	103	14218.1	103	9422.68	103	10738.5	103	3923.15	103	5587.85	103	10778.1	103	9829.18
104	14091.9	104	11604.5	104	9076.84	104	10099.1	104	3289.41	104	4664.43	104	11102.5	104	11553.7
105	11390.3	105	9781.08	105	8878.3	105	10525.4	105	3436.53	105	5023.44	105	10747.4	105	9994.81
106	10106.2	106	8451.07	106	7766.13	106	9395.36	106	2916.21	106	4532.74	106	9017.31	106	7361.67
107	9135.62	107	7969.62	107	12575	107	15960.4	107	3118.17	107	5476.44	107	7153.76	107	5925.35
108	8883.26	108	7974.98	108	9783.16	108	12883.7	108	3377.07	108	6243.31	108	6159.8	108	6011.15
109	8915.69	109	9176.33	109	13940.9	109	15564.9	109	3903.01	109	7146.56	109	6219	109	5829.88
110	8359.28	110	8512.1	110	14105.9	110	14584.4	110	4113.48	110	6790.07	110	6102.32	110	5277.35
111	7512.36	111	7283.71	111	13670.1	111	15870.3	111	4386.6	111	5551.32	111	6207.36	111	6093.42
112	7368.78	112	8082.67	112	12219.9	112	15537.1	112	5581.87	112	7574.63	112	5929.3	112	6358.64
113	6227.29	113	7030.88	113	10954.8	113	17476	113	7991.24	113	10128.2	113	6237.08	113	6650.76
114	8563.1	114	9926.54	114	10343.7	114	16656.2	114	9094.45	114	11005.6	114	5450.54	114	5633.23
115	10500.7	115	12606.8	115	10042.5	115	14071.9	115	10740.3	115	14607.6	115	5634.03	115	5531.45
116	12058.4	116	13513.1	116	10330.3	116	14031.6	116	9440.07	116	11526.7	116	4981.66	116	5039.83
117	12527.3	117	12408.6	117	10386.6	117	12743	117	9535.23	117	9682.92	117	4240.33	117	4400.3
118	12404.9	118	10603.5	118	10517.4	118	12635.9	118	9721.44	118	9947.15	118	3326.92	118	3327.34
119	12139.5	119	11011.5	119	11517.1	119	13551.3	119	10247.7	119	10814.8	119	3866.84	119	4418.99
120	11851.1	120	10828.1	120	12003	120	13713.1	120	11384.7	120	11524.8	120	2820.72	120	3659.03
121	11588.1	121	12358.5	121	12775.7	121	11911.9	121	11579.8	121	12274.7	121	2047.74	121	2199.24
122	10604.5	122	12875.1	122	13061.2	122	11755.3	122	12569.1	122	13663.5	122	1413.84	122	2511.38
123	12235.5	123	14198.9	123	14351.9	123	13551.6	123	12063	123	14515.3	123	3172.94	123	4023.89
124	12461.1	124	12882	124	13731.2	124	13896.4	124	13480.6	124	16029	124	2056.83	124	2858.47
125	12970.5	125	12898.3	125	13204.5	125	13793.6	125	13561.5	125	15661.8	125	1692.91	125	3158.85
126	13021.7	126	12788.2	126	13876.3	126	14151.2	126	13282.3	126	15694.3	126	2103.52	126	3960.65
127	15350.8	127	15008.4	127	12750.8	127	15561.1	127	13282.7	127	16151.4	127	3645.98	127	6241.86
128	12893	128	12851.9	128	12587.6	128	13758.8	128	12281.2	128	15452.7	128	4024.03	128	7089.39
129	12469	129	13014.2	129	10462.1	129	13260.8	129	11911	129	14567.3	129	4856.85	129	7297.96
130	11923.7	130	13511.6	130	9464.85	130	11542.3	130	12169.4	130	13372.7	130	5239.24	130	7526.18
131	11721.2	131	12292.6	131	8622.15	131	11647.9	131	10066.9	131	10885.6	131	4768.98	131	6768.22
132	12101.8	132	10190.9	132	7980.89	132	11189.3	132	10875.8	132	10859.3	132	3648.82	132	5184.1
133	12393	133	9959.27	133	7801.2	133	8663.8	133	10097.6	133	12390.7	133	3457.6	133	4554.51
134	12324.7	134	9002.47	134	6691.08	134	5392.33	134	9596.93	134	11991	134	3457.05	134	5219.41
135	12533	135	8889.5	135	4903.23	135	4396.24	135	8525.91	135	10609.2	135	3552.73	135	5169.23
136	12844.9	136	10373.6	136	8218.52	136	10987.4	136	8691.88	136	11287.3	136	4159.51	136	5808.28
137	11691.3	137	9806.8	137	6296.25	137	6678	137	9665.79	137	11551.9	137	4793.53	137	6895.04
138	11969.7	138	11857.4	138	8528.48	138	10213.6	138	10708.4	138	12664.8	138	5584.75	138	7407.47
139	9143.31	139	8591.43	139	8783.68	139	9931.23	139	11997.3	139	13997.1	139	6824.39	139	6838.33
140	8603.84	140	9440.17	140	10483.8	140	12690	140	12999	140	12986.5	140	6062.02	140	7012.38
141	5991.98	141	6211.11	141	9868.33	141	12245.9	141	12383.4	141	12580	141	6758.58	141	6246.96
142	4980.87	142	6489.03	142	11305.4	142	14661.8	142	11097.9	142	11048.3	142	6560.97	142	6941.37
143	4922.25	143	5509.99	143	12829.3	143	13943.6	143	10404.1	143	10344.5	143	7059.18	143	8525.6
144	4630.48	144	5476.99	144	14515.7	144	12951.2	144	10011.3	144	9998.43	144	6911.31	144	9457.14
145	3517.78	145	4292.93	145	12928.1	145	12965.8	145	9457.24	145	9089.25	145	8270.29	145	11440.7
146	2818.34	146	4159.03	146	12915.6	146	12794.9	146	10186	146	10383.1	146	9069.84	146	10356.6
147	2896.64	147	4105.29	147	14306.9	147	14384.1	147	11687.3	147	13512.1	147	8464.87	147	9424.14
148	5435.78	148	6317.17	148	15579.4	148	15596.5	148	10437	148	13471.1	148	5280.75	148	6723.92
149	4029.52	149	4848.85	149	14823.4	149	14865.8	149	9838.41	149	13314.7	149	4804.95	149	6541.38
150	7068.23	150	8913.76	150	15515	150	12720.8	150	9761.74	150	12379.9	150	3670.4	150	4074.78
151	5996.34	151	7743.39	151	16064.6	151	12786.8	151	10557.3	151	13821.8	151	3861.1	151	4369.85
152	4714.51	152	7277.02	152	14196.4	152	13095.2	152	10720.2	152	14551.6	152	4491.96	152	5093.64
153	4542.66	153	7728.46	153	12434.8	153	12832.4	153	10197.3	153	13997.2	153	5473.37	153	5608.04
154	4783.51	154	6795.63	154	12016.8	154	11038.8	154	8757.44	154	11769.5	154	6065.92	154	6532.84
155	8782.2	155	10136.4	155	10281.8	155	11391.4	155	10774	155	14782.9	155	6391.71	155	6346.79
156	7229.73	156	7346	156	9458.45	156	10609.7	156	9426.02	156	13320.6	156	6373.23	156	4168.46
157	6728.3	157	6620.58	157	10397.6	157	11181.1	157	8629.3	157	12611.5	157	4245.7	157	1433.19
158	6765.28	158	7119.96	158	11755.8	158	11149.1	158	8054.16	158	10815.3	158	2228.24	158	1334.13
159	7370.17	159	6817.71	159	12144.4	159	12271.3	159	8950.95	159	12384.4	159	1905.12	159	1600.73
160	7972.37	160	7237.94	160	12553.2	160	11912.4	160	9528.46	160	13451.6	160	2178.1	160	2531.82
161	8461.46	161	8075.72	161	13006	161	12497.8	161	8947.75	161	12571.8	161	2275.01	161	2258.78
162	9306.56	162	9132.52	162	14782	162	12935	162	8362.02	162	10514.2	162	3351.25	162	4280.58
163	10273	163	10451.1	163	15296.2	163	12335.6	163	9204.61	163	12838.9	163	3252.85	163	4920.84
164	10636.2	164	10993.7	164	15298.4	164	12302	164	8592.04	164	13720.8	164	4709.61	164	5991.51
165	11788.1	165	12920.9	165	16672.8	165	13905.5	165	8883.65	165	16103.6	165	3991.5	165	5359.62
166	13549.5	166	12083.3	166	17712.4	166	15854.8	166	7301.49	166	13395.7	166	4268.85	166	5676.32
167	14394.9	167	13241.9	167	15969.9	167	11627.7	167	6400.49	167	11658.7	167	4148.22	167	5371.54
168	13120.7	168	10176	168	18511.3	168	14331.9	168	5235.15	168	11790.7	168	4172.09	168	4975.3
169	13502.8	169	10446.8	169	18586.7	169	18628.2	169	6811.53	169	15106.8	169	3461.66	169	3982.15
170	11409.1	170	9148.23	170	18437.4	170	17810	170	5477.25	170	11416.7	170	2572.48	170	3618.47
171	12249.2	171	10082.6	171	17238.7	171	14640	171	5523.28	171	10253.1	171	2345.88	171	3108.92
172	10935.9	172	8440.81	172	17497	172	15714.9	172	4545.45	172	9048.26	172	2102.59	172	2991.42
173	9969.04	173	7859.48	173	16900.4	173	15639.1	173	3781.24	173	9342.67	173	2134.08	173	2491.25
174	10680.5	174	9354.5	174	16342.3	174	15042.5	174	3660.83	174	7597.41	174	1800.16	174	2539.58
175	8964.09	175	8336.28	175	17165.6	175	13653.1	175	3898.41	175	7444.36	175	1299.33	175	2270.4
176	9169.47	176	8507.22	176	15551.8	176	13091.2	176	5463.29	176	8312.64	176	1473.28	176	1598.7
177	9492.63	177	8889.22	177	14324.6	177	10933.6	177	6429.46	177	11044.9	177	1019.37	177	1584.33
178	8929.09	178	7245.11	178	15237.6	178	10661.5	178	4998.2	178	9632.29	178	1131.18	178	1477.98
179	8759.84	179	7711.31	179	16207.3	179	12862	179	5916.35	179	9947.77	179	830.518	179	1207.97
180	8706.54	180	7364.2	180	15385.1	180	12859.4	180	6404.25	180	10188.9	180	781.445	180	591.942
181	8230.52	181	7168.66	181	15228.5	181	13441.2	181	8658.42	181	15728.3	181	630.325	181	559.912
182	8029.91	182	9185.81	182	15561.8	182	12673.7	182	7324.63	182	11658.5	182	503.729	182	1449.65
183	7485.86	183	8221.02	183	17101.6	183	13045.1	183	9424.25	183	16313.8	183	909.564	183	1579.48
184	7153.98	184	7745.53	184	17036.2	184	13150.3	184	8016.83	184	14019.8	184	1241.89	184	1370.26
185	7231.06	185	7430.47	185	15904	185	14494.1	185	7528.89	185	10150	185	1766.98	185	2225.28
186	8238.95	186	8525.88	186	13751.1	186	13909.7	186	7116.21	186	9894.11	186	1933.44	186	1764.21
187	8385.93	187	7838.82	187	11833.7	187	10399.7	187	5723.22	187	6966.26	187	2602.82	187	1287.71
188	8489.11	188	7667.62	188	10844.8	188	11326.6	188	5735.46	188	8453.8	188	2442.74	188	1612.99
189	8332.97	189	7825.37	189	15086.2	189	14899.8	189	5057.78	189	8467.17	189	1798.64	189	1323.42
190	8684.78	190	8636.47	190	16673.9	190	15418.6	190	5170.31	190	9174.67	190	1774.31	190	1909.89
191	8852.58	191	8093.9	191	15344.6	191	11378.4	191	5225.82	191	8928.44	191	3060.72	191	4591.52
192	8711.29	192	7749.64	192	13757.1	192	9669.71	192	5037.14	192	8633	192	4593.57	192	6932.28
193	8319.54	193	7315.93	193	12356.9	193	8737.2	193	5281.05	193	9594.82	193	5575.17	193	6876.82
194	7801.7	194	6582.86	194	12610.1	194	9441.29	194	5594.11	194	10443.5	194	6624.9	194	7702.06
195	8683.01	195	7726.49	195	13355.1	195	13047.8	195	5662.79	195	9127.6	195	6106.53	195	5770.28
196	8855.79	196	7884.09	196	14567.1	196	13144.1	196	6477.82	196	9558.68	196	5230.6	196	5024.7
197	8198.63	197	8246.22	197	13888.1	197	12017.3	197	6158.03	197	10630.3	197	3771.34	197	4628.03
198	7574.45	198	7789.12	198	16176.4	198	15848.5	198	4880.67	198	10541.1	198	3819.89	198	4735.35
199	8274.92	199	7964.4	199	15677.8	199	14524.9	199	4349.15	199	8204.41	199	2845.17	199	3575.3
200	8050.27	200	7300.03	200	13889.5	200	13237	200	4170.57	200	6430.13	200	2943.19	200	3838.01
201	8388.09	201	7000.76	201	11563.7	201	12804.8	201	4781.45	201	8008.83	201	2831.41	201	3225.15
202	8820.88	202	8597.3	202	10337.4	202	11906.1	202	4211.94	202	7283.87	202	2754.61	202	3733.41
203	6468.38	203	7256.76	203	10884.5	203	13406.7	203	3808.99	203	6955.45	203	2779.17	203	3500.26
204	7301.75	204	7591.93	204	10491.8	204	13104.5	204	3280.98	204	5744.14	204	2955.36	204	3638.04
205	8058.88	205	7938.15	205	10012.3	205	13799.4	205	2861.89	205	4693.28	205	3020.72	205	3459.74
206	9065.96	206	10219	206	10213.8	206	13221	206	3426.27	206	5725.11	206	3072.11	206	4047.62
207	9819.11	207	10077.6	207	10908	207	11826.6	207	3609.8	207	5342.34	207	3404.8	207	4507.22
208	10152.2	208	9304.37	208	12539.8	208	12753.2	208	3473.11	208	4725.48	208	3905.2	208	5144.45
209	10763.9	209	9787.98	209	12409.3	209	11861.3	209	3728.36	209	4258.57	209	4888.98	209	5413.74
210	11514.1	210	9601.52	210	11259.2	210	11780	210	4000.41	210	5333.13	210	5589.2	210	6142.98
211	11837.5	211	9890.26	211	10965.2	211	12350.8	211	3394.62	211	5625.59	211	5682.16	211	6183.86
212	12081.7	212	10878	212	11467.7	212	11619	212	4650.13	212	5104.28	212	6069.22	212	7983.73
213	14038.9	213	12123.7	213	12702.2	213	12460.5	213	3817.12	213	6160.22	213	7429.98	213	9713.14
214	13892.8	214	12370.7	214	14362	214	11964.9	214	3943.24	214	7736.72	214	7865.15	214	10389.2
215	13834.1	215	11305	215	15930.1	215	11291.5	215	4450.84	215	6900.49	215	6606.22	215	7930.6
216	14117.1	216	10410.9	216	16559.8	216	12837.9	216	4188.3	216	5514.19	216	7366.93	216	8340.75
217	14533.7	217	11422.3	217	15200.6	217	10902	217	4609.51	217	5247.11	217	6698.06	217	6779.69
218	14601.3	218	11240.7	218	15676.1	218	10019.6	218	3890.8	218	5137.62	218	5756.82	218	6114.23
219	15320.8	219	12391.1	219	16003.1	219	12655	219	4524.79	219	6150.34	219	6179.22	219	7020.65
220	14863.1	220	13233.6	220	15246.4	220	14283.8	220	4302.2	220	6115.52	220	5721.06	220	6860.03
221	13985	221	12748.5	221	14500.8	221	14736.8	221	4110.16	221	5770.09	221	5856.94	221	7584.35
222	12426.7	222	12511.1	222	16191.6	222	15476.2	222	5112.07	222	6449.6	222	5950.34	222	7493.86
223	12556.5	223	13194	223	14273	223	13105.6	223	5076.68	223	7558.63	223	6547.24	223	9317.15
224	11499.9	224	12169.6	224	12334.8	224	10329.3	224	4670.27	224	9055.61	224	6121.25	224	7462.85
225	11149	225	10923.9	225	14837.4	225	15389.8	225	4339.55	225	8064.94	225	6460.93	225	7148.35
226	11856.3	226	10563.5	226	16505	226	16134.5	226	4435.61	226	6682.33	226	6494.75	226	6286.02
227	10799.6	227	9747.47	227	14474.4	227	12737.4	227	4625.8	227	5722.77	227	5517.08	227	5095.13
228	10132.9	228	8543.64	228	14239.6	228	12164.9	228	4469.15	228	4758.97	228	4450.22	228	4383.95
229	11111.8	229	9322.32	229	14487	229	12196	229	5409.01	229	6140	229	3938.61	229	4389.1
230	9754.66	230	8004.17	230	14061.8	230	12125.7	230	5916.33	230	6812.98	230	3713.73	230	4200.13
231	12595.4	231	9936.09	231	13469.9	231	11557.7	231	6421.38	231	8229.63	231	3121.58	231	2950.26
232	11216.1	232	9514.26	232	12961.8	232	11518.6	232	6202.58	232	8786.23	232	2693.22	232	2844.34
233	15169.2	233	12235.4	233	12652	233	10981	233	7294.95	233	12046	233	3124.91	233	3847.59
234	12347.6	234	11578.5	234	11691.4	234	10252.2	234	7423.9	234	11474.3	234	4124.28	234	4836.18
235	10794.9	235	11047	235	10857.3	235	10520.6	235	7505.24	235	13731.5	235	3066.64	235	3085.88
236	12129.8	236	10090.2	236	11888.4	236	11858.4	236	6304.39	236	12877.5	236	2657.44	236	2829.11
237	14702.5	237	12892.2	237	10906.8	237	11680.3	237	4126.94	237	10178.2	237	2654.85	237	3925.92
238	13560.6	238	11819.2	238	11024.7	238	11204.1	238	3890.76	238	9146.24	238	3123.42	238	5169.72
239	15475.3	239	13177.9	239	10499.1	239	11066.2	239	3957.82	239	7479.46	239	2409	239	3947.43
240	16189.3	240	13684.4	240	10910.1	240	10879.4	240	3792.65	240	6514.63	240	3269.84	240	5529.7
241	16698.3	241	12187.6	241	10790.2	241	10666.9	241	4006.11	241	7301.48	241	2639.35	241	5023.79
242	18135.7	242	13242.9	242	10744	242	10606.5	242	4674.21	242	8091.3	242	3759.61	242	6801.57
243	16275.4	243	13206.8	243	11759	243	10036.3	243	5778.45	243	8040.34	243	5833.27	243	8838.22
244	13968.5	244	10381.1	244	12153.9	244	10275.8	244	6444.52	244	8846.55	244	5494.57	244	8235.38
245	9251.04	245	5301.41	245	12080.4	245	10668.1	245	5533.99	245	8262.9	245	8434.01	245	10315.4
246	7564.19	246	4058.88	246	13128.5	246	12270.4	246	5488.54	246	8966.37	246	8324.5	246	9639.37
247	6823.59	247	3825.25	247	14022	247	12159.8	247	5914.02	247	7799.46	247	7946.06	247	9634.63
248	6031.52	248	3905.57	248	13576.9	248	12668.5	248	5333.65	248	7369.1	248	8047.98	248	9972.19
249	4622.73	249	3168.04	249	14468.2	249	11415.4	249	5112.59	249	6335.82	249	9005.59	249	8694.42
250	4466.39	250	3782.43	250	16314.1	250	11557.4	250	4343.95	250	4485.77	250	8219.86	250	8447.43
251	5111.9	251	5448.98	251	16114	251	11822	251	3182.67	251	2752.71	251	7488.69	251	7818.86
252	4040.24	252	4049.84	252	17194.5	252	13084.7	252	2620.2	252	3215.7	252	6800.96	252	7069
253	4206.22	253	3696.96	253	16569.8	253	14526.5	253	2002.21	253	2156.2	253	6297.98	253	7553.77
254	3918.89	254	4191.77	254	15303.1	254	14194.5	254	1785.7	254	1302.54	254	5774.85	254	6080.97
255	4682.79	255	5009.3	255	14985.7	255	14337.3	255	1556.33	255	1939.89	255	5160.51	255	4777.75
256	6166.32	256	4382.92	256	15200.5	256	14497.3	256	2066.84	256	1748.94	256	4064.8	256	5204.58
257	6939.86	257	4987.62	257	13946.7	257	12801	257	4076.64	257	3580.1	257	3556.94	257	5065.01
258	6887.93	258	4715.61	258	14666.2	258	13324.9	258	4931.72	258	5280.52	258	3852.57	258	4132.83
259	9110.57	259	6990.87	259	15258.4	259	13696.6	259	4401.05	259	3681.8	259	4023.75	259	4688.27
260	8523.01	260	7060.92	260	15870	260	14711	260	2689.34	260	3625.86	260	4085.37	260	5751.12
261	7894.6	261	9025.86	261	14566.2	261	14721.5	261	4341.84	261	5262.82	261	4036.63	261	5716.81
262	6747.71	262	8571.48	262	14971.1	262	15630.6	262	4768.07	262	6268.58	262	4466.71	262	5343.58
263	5355.37	263	7961.89	263	15163.7	263	14887.4	263	4455.67	263	5603.72	263	4007.43	263	5033.4
264	5783.67	264	9354.04	264	14874.2	264	13841.1	264	5176.02	264	7170.19	264	5150.87	264	6418.87
265	6135.04	265	8786.08	265	12780.6	265	13199.3	265	5394.84	265	7559.77	265	3953.31	265	3599.09
266	5070.54	266	7534.53	266	12414.9	266	11217.7	266	5291.72	266	6344.57	266	3383.17	266	2258.35
267	5379.19	267	6867.38	267	10043.3	267	6833.12	267	5917.19	267	7633.36	267	4124.43	267	4509.38
268	5438.03	268	6779.88	268	8353.43	268	5446.13	268	8312.18	268	10118	268	4736.22	268	5040.79
269	5542.72	269	4350.09	269	7900.09	269	6561.66	269	6964.68	269	10431.9	269	5600.44	269	6536.24
270	5679.91	270	3753.09	270	8798.12	270	7975.78	270	7712.53	270	13054.6	270	5489.08	270	6545.56
271	7077.19	271	5102.59	271	8531.22	271	10012.4	271	9403.91	271	15162.6	271	4169.4	271	4958.52
272	7290.12	272	5281.08	272	8919.47	272	10357.6	272	8784.52	272	12234	272	4694.08	272	5805.39
273	7199.46	273	4352.67	273	11715.6	273	10874.9	273	8377.15	273	9027.28	273	4514.35	273	5391.98
274	6728.01	274	4321.53	274	13448.8	274	13057.7	274	9803.03	274	12645.2	274	4765.62	274	5510.72
275	5890.61	275	4014.65	275	15273.1	275	13812.6	275	8970.18	275	13162.4	275	4703.97	275	5752.98
276	5411.9	276	3707.8	276	15846.4	276	14752.5	276	9337.74	276	12110.2	276	4581.35	276	6193.73
277	5101.13	277	4179.85	277	15923.1	277	13105.2	277	9990.85	277	11352.5	277	4685.69	277	7166.03
278	5109.55	278	4318.34	278	15541.3	278	13803.7	278	10824.3	278	12174.8	278	5151.27	278	7440.86
279	6760.73	279	4329.84	279	15636	279	13353	279	11790.5	279	13056.8	279	5056	279	6763.82
280	6730.17	280	5492.08	280	16424.5	280	13592.8	280	11942	280	13412.2	280	4941.44	280	6278.26
281	7835.16	281	5845.57	281	16295.8	281	12885	281	13682.8	281	17889.6	281	3850.31	281	5032.65
282	8912.42	282	7819.98	282	15693.2	282	13438.9	282	10726.2	282	13500.5	282	4225.52	282	6230.94
283	9486.83	283	8591.3	283	14127.9	283	13100.5	283	9452.8	283	11630.3	283	2652.84	283	4124.85
284	9496.78	284	8254.32	284	15090.1	284	11257.8	284	8290.06	284	9654.75	284	1761.68	284	2338.81
285	8937.4	285	7510.38	285	11017.4	285	10906.9	285	7826.81	285	8003.79	285	1730.23	285	2020.91
286	9710.53	286	8282.6	286	8253.86	286	8254.61	286	7072.3	286	7077.29	286	1705.5	286	2154.79
287	10926.1	287	9282.67	287	9164.31	287	8453.25	287	6880.65	287	6963.36	287	1055.89	287	1452.64
288	11153.1	288	7876.77	288	8432.96	288	7014	288	6937.4	288	7698.54	288	1204.05	288	1799.99
289	9536.77	289	7127.47	289	9272.51	289	8463.03	289	6991.27	289	8563.7	289	953.265	289	1565.85
290	7238.18	290	5474.14	290	9577.05	290	9308.86	290	8390.28	290	11585.4	290	1171.91	290	1468.17
291	9541.58	291	7967.62	291	11554.6	291	8977.67	291	9584.06	291	11977.1	291	847.882	291	1252.45
292	8262	292	7005.14	292	11291.7	292	9248.75	292	9148.35	292	11992.5	292	1653.35	292	2474.87
293	8172.39	293	6633.76	293	12718.7	293	11035.5	293	9935.03	293	13471.1	293	2187.61	293	2866.24
294	10694.4	294	7349.13	294	14028.3	294	10682	294	8926.67	294	11187.8	294	1387.41	294	1188.97
295	10080	295	7272.22	295	13647.4	295	12292.1	295	8477.75	295	10788.9	295	1244.17	295	993.473
296	9830.84	296	6708.53	296	13671.1	296	10604.5	296	9227.01	296	12650.7	296	619.126	296	690.291
297	10451.6	297	8187.81	297	13906	297	10939.8	297	7680.05	297	9809.9	297	656.665	297	323.564
298	16389.9	298	14068.5	298	13603	298	10734	298	6781.69	298	9402.49	298	472.291	298	364.828
299	13608.4	299	10794.2	299	12331.2	299	8490.8	299	7449.07	299	11076.1	299	602.209	299	501.841
300	12423.3	300	9701.22	300	10246.9	300	7302.59	300	8075.77	300	12088.4	300	723.501	300	1175.53
301	11897.1	301	10156.5	301	9189.39	301	5661.22	301	8554.03	301	10482	301	1117.47	301	2005.4
302	11314	302	11354	302	7449.02	302	5468.01	302	8005.3	302	10585.2	302	1543.45	302	2258.17
303	11053.5	303	9632.32	303	7830.69	303	6518.55	303	8855.53	303	10358.5	303	1871.84	303	3051.15
304	9437.16	304	7470.05	304	7955.39	304	7627.11	304	9072.73	304	10003.2	304	3523.95	304	4721.59
305	5884.58	305	5250.38	305	10079.6	305	9692.37	305	11284.9	305	10081.7	305	3598.07	305	4279.43
306	6848.43	306	6723.96	306	9204.01	306	8204.42	306	11742	306	12602.9	306	4603.59	306	4999.53
307	8366.16	307	7695.44	307	10015.9	307	9050.42	307	13269.5	307	14234.7	307	3319.44	307	4057.56
308	8782.44	308	6270.67	308	9850.7	308	9292.46	308	14092.5	308	14758.7	308	2400.88	308	2898.65
309	9257.06	309	7123.37	309	9586.8	309	9371.9	309	12880.5	309	15702.7	309	2097.11	309	2090.41
310	12188.1	310	10382.4	310	9548.5	310	9004.09	310	9608.97	310	12157.7	310	2266.45	310	3266.94
311	12449.2	311	8818.74	311	8967.45	311	9878.33	311	8043.57	311	7306.86	311	1811.78	311	3060.73
312	17661.3	312	10659	312	8102.83	312	8727.77	312	6257.62	312	6146.28	312	1769.45	312	2700.9
313	16089.2	313	9572.73	313	7244.01	313	8555.33	313	5503.84	313	5191.42	313	3099.88	313	6371.02
314	12631.5	314	7004.54	314	8755.22	314	9774.72	314	6488.27	314	5812.04	314	2719.16	314	5346.18
315	8512.88	315	2743.33	315	11028.2	315	8970.97	315	7446.69	315	7234.11	315	3374.46	315	5146.81
316	5741.32	316	2160.88	316	12615.1	316	9479.59	316	10086.3	316	10196.9	316	4442.23	316	4977.62
317	5426.17	317	2435.48	317	12280.7	317	10208.4	317	9129.69	317	9295.68	317	4244.97	317	2354.16
318	5080.22	318	2539.26	318	14617.5	318	10220.2	318	9732.23	318	10368	318	4721.55	318	3239.15
319	5711.01	319	2824.5	319	13104.8	319	11173.7	319	9062.75	319	9203.59	319	5102.66	319	4206.87
320	6351.49	320	2966.71	320	13067.5	320	14386.3	320	10055.7	320	9699.44	320	4765.12	320	3638.09
321	8046.75	321	3924.43	321	11636.3	321	10345.9	321	9878.66	321	10078.3	321	4956.3	321	3691.52
322	9718.8	322	6071.92	322	9852.42	322	7108.18	322	9857.11	322	10115.4	322	4196.8	322	2194.3
323	9274.9	323	7114.93	323	8995.28	323	8799.31	323	10840.5	323	9709.1	323	2895.7	323	1612.14
324	9871.3	324	8475.73	324	7700.94	324	6792.64	324	9139.9	324	7918.88	324	2721.68	324	1704.55
325	10695.5	325	9948.87	325	7228.2	325	5682.64	325	7271.17	325	4928.91	325	3638.31	325	2527.79
326	10043	326	8611.72	326	6557.95	326	6349.01	326	4242.67	326	1920.32	326	4328.01	326	3363.42
327	8477.25	327	9299.76	327	5347.85	327	5748.04	327	2768.01	327	1015.04	327	4429.44	327	3749.83
328	6380.48	328	8016.16	328	6108.37	328	7700.91	328	4255.81	328	1542.95	328	5499.59	328	4914.51
329	7322.53	329	8785.51	329	5061.93	329	6812.49	329	2622.4	329	983.879	329	4383.38	329	4661.79
330	6616.23	330	7951.63	330	6711.59	330	8742.06	330	3123.12	330	1323.1	330	3844.1	330	4620.24
331	6153.26	331	8114.24	331	6905.38	331	7772.6	331	6810.18	331	6349.66	331	4213.38	331	5877.66
332	8046.68	332	9791.14	332	9276.97	332	8648.18	332	9461.56	332	8504.14	332	3054.99	332	4404.8
333	7452.93	333	7884.19	333	11045.7	333	10583.4	333	10695.1	333	10149.6	333	2832.3	333	4315.96
334	7572.37	334	8336.83	334	12198.6	334	12643.6	334	11660.6	334	12541.9	334	2513.86	334	4491.52
335	6870.42	335	7094.43	335	12958.9	335	12766	335	11844.7	335	14795.9	335	1470.31	335	2719.24
336	7109.03	336	5860.02	336	12960.4	336	13303.9	336	11542.8	336	15407.6	336	1374.74	336	2226.57
337	7566.88	337	6017.18	337	12421.7	337	13201.8	337	12339.8	337	15304	337	1314.71	337	1801.64
338	7835.63	338	7551.83	338	12923.2	338	14293.9	338	13930.1	338	19002.8	338	1191.69	338	1502.44
339	6720.6	339	6462.3	339	12219.4	339	12373.4	339	16385.3	339	20416.3	339	1849.2	339	1738.83
340	6486.36	340	9307.73	340	9389.93	340	9673.74	340	17246.8	340	22260.5	340	2999.5	340	2263.44
341	5398.78	341	8060.31	341	10397.5	341	11360.6	341	18439.4	341	25372.8	341	3358.41	341	3587.82
342	5309	342	7670.9	342	8673.04	342	8195.76	342	12595.1	342	14956.7	342	4192.25	342	4520.36
343	5644.78	343	5895.82	343	8774.2	343	8749.9	343	8977.03	343	9869.84	343	6444.32	343	6827.43
344	4928.08	344	7201.62	344	7497.48	344	8729.83	344	8957.74	344	12020.3	344	9061.29	344	8092.18
345	4943.05	345	6946.29	345	7488.28	345	9586.34	345	8157.54	345	11282	345	12102.3	345	12773.2
346	4414.72	346	6850.98	346	7518.01	346	9741.37	346	5011.73	346	8875.41	346	9902.4	346	9744.76
347	3882.64	347	6658.42	347	8037.87	347	10236.6	347	5982.38	347	5678.83	347	11847.1	347	12400.4
348	3895.51	348	6037.66	348	8571.62	348	11954.3	348	7051.38	348	6609.47	348	14427.3	348	17814.9
349	4367.95	349	5451.06	349	9091.49	349	11426.9	349	6096.6	349	4459.37	349	15399.3	349	19880.2
350	6228.16	350	5522.61	350	9066.3	350	9886.65	350	6151.61	350	3683.9	350	13984.2	350	15718.6
351	6736.36	351	5620.82	351	10072.5	351	9239.46	351	7838.83	351	4641.6	351	15606.6	351	19848.8
352	8222.12	352	7902.66	352	10812.3	352	9898.22	352	8867.19	352	5811.84	352	13191.4	352	12635.5
353	8212.46	353	8820.88	353	11123.2	353	8858.23	353	8829.31	353	6057.42	353	12924.3	353	13849.2
354	7708.59	354	9221.91	354	14139.8	354	11332	354	7502.15	354	4705.95	354	15260.5	354	17556.4
355	5557.07	355	6988.85	355	12576	355	10516.7	355	8054.25	355	6523.05	355	17642.7	355	19571.4
356	7296.25	356	7646.85	356	13285.7	356	11455.5	356	9591.73	356	8550.34	356	16106.4	356	14556.7
357	5984.28	357	5644.89	357	12736.2	357	12904.5	357	10764.3	357	10458.8	357	15747.2	357	15472.9
358	3897.33	358	4228.07	358	16124.5	358	17136.8	358	12184	358	12836.6	358	16128.2	358	15867
359	2770	359	4062.3	359	17079.1	359	14299.6	359	13563.9	359	13540.4	359	17368.3	359	18405
360	3059.85	360	3829.75	360	18646.6	360	13682.3	360	13677.9	360	14745.2	360	18648.8	360	21072.4
361	2513.11	361	3454.12	361	16174.8	361	11027.1	361	15819.6	361	17726.7	361	18644.5	361	20990.9
362	3195.01	362	3583.86	362	15977.9	362	11014.5	362	15951.9	362	18515.7	362	20495.1	362	23634.9
363	3599.91	363	3148.45	363	14028.3	363	9845.12	363	16610.9	363	19961.1	363	21284	363	22446.9
364	4281.69	364	4004.27	364	10452.6	364	7693.06	364	16352.7	364	20142.9	364	22199.9	364	22508.1
365	5743.85	365	5829.64	365	9423.5	365	7247	365	16961.5	365	22787	365	21653.5	365	23138.2
366	6998.22	366	7162.49	366	8173.88	366	5701.74	366	14372.3	366	19910.9	366	22860.8	366	25024.6
367	7774.93	367	8518.47	367	7690.42	367	5889.78	367	13256.3	367	17690.5	367	20779.9	367	23340.5
368	8239.45	368	7939.1	368	8386.94	368	5648.92	368	11208.5	368	13571.4	368	17510.2	368	20786.4
369	8469.12	369	6721.1	369	8629.76	369	7307.67	369	11987.9	369	13747.9	369	22072.5	369	26442
370	8474.42	370	8351.46	370	8621.78	370	9439.92	370	11004.2	370	13197.8	370	19542.4	370	25190.8
371	7965.94	371	7913.14	371	7906.9	371	7197.74	371	10248.6	371	13552.6	371	17582.1	371	23556.4
372	6693.01	372	7751.08	372	8679.99	372	6716.18	372	8921.77	372	10781.6	372	17914.2	372	24435.5
373	5853.64	373	8081.31	373	9913.51	373	9427.39	373	9057.29	373	11223.7	373	18423.3	373	24043.8
374	5766.68	374	7568.94	374	10522.2	374	10205.8	374	10208.4	374	14397.2	374	17708	374	23210.7
375	5952.2	375	7286.87	375	11764.7	375	11773.2	375	9879.44	375	12621.1	375	20359.9	375	26101.9
376	6550.55	376	8015.23	376	12079.2	376	11726.5	376	10346.9	376	12820.7	376	18445.2	376	23802.7
377	7658.21	377	8667.27	377	12636.9	377	10509.8	377	10835.6	377	11888.5	377	18503.5	377	24190.7
378	9953.39	378	8399	378	12252	378	10001.7	378	10784.1	378	12522.7	378	16801.3	378	23304.2
379	10968.7	379	7966.08	379	10951.6	379	10749.3	379	9752.84	379	13451.3	379	19447.4	379	24614
380	12163.1	380	9603.26	380	11280.2	380	10455	380	9469.74	380	11717.6	380	17715.6	380	22689.4
381	12032.7	381	12519.1	381	10414.9	381	8120.9	381	9677.19	381	11392.5	381	18005.1	381	22665.8
382	9683.67	382	10685.4	382	10196.9	382	9201.31	382	10293.5	382	12427.9	382	17113.7	382	22082.1
383	8926.67	383	9780.51	383	10277.9	383	7364.26	383	10575.8	383	12066.8	383	17288	383	21313.7
384	8736.42	384	9259.84	384	7418.17	384	6037.69	384	12890	384	12288.7	384	17974.9	384	20451.4
385	8290.67	385	9324.45	385	6803.13	385	5324.03	385	13596.2	385	12820.4	385	16439.5	385	18995.1
386	7876.49	386	6704.73	386	6219.38	386	6362.06	386	14018.6	386	12867.1	386	17918	386	18748.7
387	6921.67	387	7253.36	387	6070.31	387	5053.02	387	14810.3	387	12604.9	387	17547.4	387	18932.1
388	6041.65	388	5651.75	388	6135.05	388	6763	388	14167	388	11553.3	388	18507.5	388	21384.9
389	7037.2	389	6974.33	389	6617.54	389	6322.97	389	17569.6	389	20232.2	389	17440	389	20442.2
390	8987.15	390	9850.7	390	9481.57	390	10683.1	390	18652.8	390	20630.2	390	15048.4	390	18634
391	11661.1	391	12469.5	391	9226.9	391	9961.17	391	16907.2	391	21288.5	391	18598.5	391	21705.5
392	12170.4	392	13439.5	392	12164.3	392	13265.4	392	17387.1	392	22247.4	392	16651	392	19463.6
393	13106.8	393	15612	393	12086.8	393	11497.7	393	15613.5	393	19194.2	393	14925.4	393	17704
394	11582	394	14380.4	394	10304.8	394	7879.2	394	15259.5	394	19749.2	394	16631	394	18588.3
395	10151.3	395	11563.5	395	8237.69	395	6041.18	395	15679.4	395	20834.7	395	14788.4	395	16752
396	10068.9	396	9997.66	396	6703.24	396	5547.47	396	15282.1	396	19907	396	16943.9	396	17995.8
397	12210.4	397	10179	397	6816.17	397	5865.06	397	15581.8	397	21466.4	397	14533	397	15647
398	12327.8	398	11621.9	398	8538.97	398	7623.59	398	14268.8	398	18843.6	398	11877.6	398	13341.2
399	15268.6	399	12195.3	399	7146.78	399	6592.41	399	15239	399	18825.5	399	12127.2	399	15181.3
400	14505.3	400	12114.7	400	8640.24	400	7804.11	400	16985	400	21078.1	400	11211.8	400	13321.3
401	13144.4	401	9529.64	401	9375.44	401	7114.63	401	15390.3	401	17099.2	401	14495.4	401	17780.6
402	16665.4	402	10166.8	402	10102.4	402	4626.17	402	12395.1	402	11958.4	402	12199	402	16092.8
403	13494	403	7776.92	403	6828.98	403	2649.5	403	12257.8	403	11673.6	403	10923	403	15014.6
404	9826.31	404	6390.19	404	5441.52	404	3464.94	404	9559.99	404	9288.51	404	9247.02	404	13105.1
405	10609.1	405	6210.05	405	7217.97	405	4975.65	405	8790.32	405	9526.48	405	8450.02	405	10494.8
406	12331.2	406	7664.85	406	7929.13	406	5886.34	406	7699.15	406	8698.31	406	12976.8	406	16361.9
407	11426.5	407	7141.77	407	8666.98	407	6015.44	407	6234.26	407	9820.76	407	9867.68	407	12421.3
408	12507.3	408	11989.3	408	10312	408	12258.3	408	4857.22	408	6973.15	408	8631.41	408	10648.6
409	13312.1	409	13279.5	409	11057	409	12489.5	409	5931.9	409	8359.63	409	6922.12	409	8577.42
410	14482.9	410	12734.6	410	9158.13	410	10875.5	410	7221.22	410	11283.4	410	5890.98	410	7243.32
411	14950.4	411	13043.8	411	10358.8	411	10458.2	411	5438.94	411	8650.46	411	4048.88	411	4687.75
412	16523.1	412	13554.4	412	10601.4	412	10054.1	412	8131.69	412	11938.1	412	3441.15	412	3906.3
413	15284.1	413	14354.7	413	10883.6	413	11524.2	413	8641.76	413	12264.5	413	3486.24	413	4120.51
414	13385.9	414	14236.4	414	10401.1	414	15009.5	414	10255.5	414	14004.6	414	3320.79	414	4498.45
415	14525.5	415	12463.1	415	7120.67	415	9529.99	415	9712.64	415	13298.4	415	3596.91	415	4137.06
416	12365.3	416	11374.3	416	8109.2	416	9720.64	416	11810.1	416	16813.4	416	3085.38	416	2876.64
417	11860.3	417	9801.79	417	8765.63	417	9767.52	417	10531.5	417	17199.1	417	2918.62	417	1983.6
418	11812.5	418	8923.65	418	9399.57	418	11561	418	9648.99	418	15757.4	418	3470.75	418	3345.92
419	11918.4	419	9142.97	419	7146.05	419	11973.7	419	10758.4	419	18793.5	419	2927.85	419	2514.44
420	11864.7	420	9218.58	420	4515.63	420	8521.79	420	7807.39	420	14306.1	420	1907.32	420	2602.38
421	11890.2	421	9765.25	421	4215.3	421	6503.79	421	7900.14	421	13689.2	421	2021.06	421	2283.95
422	11493.7	422	10789.9	422	5079.98	422	5185.18	422	8766.02	422	13870.9	422	1202.39	422	1615.44
423	12427.6	423	11483.9	423	7162.92	423	6167.84	423	7478.42	423	11859	423	2195.18	423	3251.36
424	12750.2	424	11272.7	424	11059.1	424	6602.53	424	7599.93	424	12576.9	424	4814.5	424	7741.2
425	11774	425	11492.9	425	12874.1	425	9503.62	425	6695.54	425	10730.9	425	5341.19	425	8172.72
426	17134.9	426	17190.2	426	12163	426	7789.08	426	7882.12	426	11868.5	426	4837.29	426	7417.79
427	15173.1	427	15778.5	427	10420.5	427	7364.15	427	5690.85	427	9607.41	427	4831.73	427	7970.65
428	13818.7	428	15811.1	428	12897.7	428	8801.89	428	6684.02	428	10300.9	428	3340.44	428	5855.38
429	19584	429	20778.6	429	12489.6	429	8913.65	429	5332.22	429	8117.71	429	4219.44	429	7611.45
430	15882.6	430	18729.8	430	12237.9	430	10338.6	430	6218.14	430	10054.1	430	5147.21	430	7996.96
431	12875.7	431	18270.5	431	10558.2	431	9468.5	431	6520.4	431	9767.76	431	6856.98	431	8285.91
432	9966.6	432	14408.2	432	10860.6	432	9035.66	432	7604.7	432	11532.8	432	7135.11	432	8081.61
433	8865.3	433	12041.8	433	10402.9	433	8345.41	433	7147.72	433	11284.1	433	10906.9	433	10383.4
434	8700.94	434	11527.5	434	11741.3	434	7351.37	434	7790.99	434	13625.1	434	11335.1	434	11646.1
435	8096.06	435	10724.5	435	18414.4	435	12826.2	435	8067.65	435	14347.7	435	9553.43	435	10944.1
436	7667.22	436	8958.15	436	16069.3	436	11223.7	436	10187.6	436	16703.9	436	9599.66	436	8370.63
437	7949.85	437	8938.14	437	16674.1	437	15849.5	437	10047.7	437	15860.7	437	14746.9	437	12027.6
438	8533.93	438	10379.9	438	15026.8	438	11790.5	438	10338	438	15366.8	438	15968.2	438	13544
439	9076.93	439	11259	439	14234.1	439	11784.2	439	8728.88	439	12555.9	439	15457.3	439	12494.4
440	9304.11	440	11708	440	12827.8	440	15220.2	440	10855.7	440	14479.6	440	17231.2	440	14810
441	8885.02	441	10352.6	441	9458.49	441	13063.3	441	8861.19	441	13610.2	441	17709.9	441	18066.6
442	7533.1	442	10191.9	442	12402	442	15654.1	442	10288.7	442	15403.3	442	17581.8	442	17881.2
443	8025.78	443	11190.9	443	13134.4	443	14517.3	443	10052.4	443	12639.7	443	16269.6	443	18169.8
444	8830.7	444	12176.2	444	21524	444	19728	444	7778.34	444	10634.3	444	15799.8	444	15866.4
445	7734.88	445	11423.7	445	19826.1	445	17435.7	445	8510.78	445	10199.9	445	17245.4	445	16101
446	12020.6	446	16141.9	446	20960	446	17986.3	446	6482.07	446	9914.51	446	15938.7	446	14988.2
447	12152	447	13962.7	447	19847.4	447	17254.6	447	5311.58	447	8661.18	447	10709.8	447	9074.79
448	12188.2	448	9422.2	448	19197.5	448	16064.5	448	6045.83	448	8684.26	448	5798	448	3595.21
449	10891.8	449	7858.8	449	19711.4	449	18519.7	449	6812.57	449	10616.2	449	4447.65	449	2238.98
450	12007.4	450	10234.2	450	20340	450	15984.9	450	5924.3	450	10759.2	450	4752.67	450	2611.53
451	13033.4	451	12168.5	451	20122.5	451	17079.9	451	6365.02	451	11331.4	451	5078.35	451	3505.51
452	11462.1	452	10956.7	452	20402.8	452	17272.5	452	7308.69	452	11564.8	452	5504.01	452	3140.58
453	12637.8	453	13289.6	453	19948.1	453	15342.3	453	7990.06	453	11700.2	453	8303.44	453	6639.41
454	12720.7	454	12356.5	454	19005.7	454	15968.3	454	6959.69	454	10733.4	454	7839.75	454	7305.92
455	14131.7	455	12454.8	455	17245.4	455	15627.7	455	8128.43	455	13702.2	455	7644.58	455	7648.18
456	15513.2	456	14223.9	456	15957.5	456	15494.8	456	7160.91	456	13981.9	456	6780.09	456	6840.46
457	14748.3	457	13475.4	457	15962	457	14947.6	457	8315.1	457	15000.4	457	5558.2	457	5813.84
458	15698.9	458	14182.2	458	17969.1	458	16403.7	458	7932.73	458	13825.9	458	4069.48	458	4216.64
459	14152.4	459	14345.1	459	16744.7	459	16292.1	459	7874.8	459	13374.3	459	4118.81	459	3844.53
460	12640.7	460	13560.7	460	12911.9	460	13628.3	460	6580.68	460	11899.9	460	4323.87	460	3325.83
461	11765.7	461	13258.7	461	10865.4	461	12607.8	461	6325.99	461	10774.7	461	5329.47	461	4071.35
462	10312.3	462	11430.4	462	10799.8	462	10438.2	462	6080.8	462	10991.7	462	6044.45	462	5111.1
463	10175.4	463	10774	463	12219.1	463	9882.1	463	6031.24	463	10949	463	6235.6	463	4786.64
464	10296.5	464	11710	464	14320.8	464	10355.2	464	6199.36	464	10102.9	464	8218.04	464	6495.23
465	10878.3	465	13759.2	465	12370.2	465	9508.14	465	5562.93	465	9963.1	465	9845.12	465	8117.27
466	11583.9	466	14338.1	466	10595.9	466	7901.72	466	6576.47	466	10708.5	466	9284	466	6241.68
467	13009	467	15806.7	467	8110.48	467	5635.48	467	6788.87	467	9046.67	467	9209.33	467	6074.19
468	13644.7	468	16800	468	6979.33	468	6287.93	468	6706.78	468	9497.22	468	8276.94	468	5167.16
469	16405.5	469	16153.2	469	7140.33	469	5458.26	469	6830.46	469	10359.9	469	8186.01	469	6131.58
470	15557.5	470	16711	470	7873.15	470	6017.03	470	6830.34	470	10375.5	470	9097.72	470	7291.88
471	14561.2	471	12618.7	471	7874.02	471	5925.83	471	5320.17	471	9012.37	471	10349.4	471	9895.25
472	10843.6	472	8066.12	472	8650.86	472	5843.6	472	3106.12	472	6240.76	472	10605.2	472	11674.2
473	12547.9	473	10300.9	473	8217.18	473	6955.2	473	2130.56	473	3546.76	473	10763	473	9961.22
474	12430.1	474	9990.84	474	7761.45	474	8840.77	474	1309.63	474	2104.98	474	11211.4	474	9790.21
475	11691.3	475	8797.95	475	8572.28	475	9138.85	475	1208.84	475	2925.37	475	10630.5	475	9051.87
476	12967.2	476	10743.7	476	7951.6	476	4763.43	476	1449.14	476	3883.39	476	9821.27	476	7561.58
477	13080.9	477	11348.8	477	12295	477	7714.4	477	2656.55	477	5772.94	477	8753.88	477	7758.35
478	12696.3	478	12419.9	478	14244.4	478	10379.3	478	3191.23	478	5316.07	478	7868.58	478	6906.27
479	11823.2	479	11996.8	479	16035.6	479	10191.8	479	4117.18	479	5308.45	479	7933.45	479	6869.17
480	12442.7	480	12115.1	480	19195.9	480	10863.5	480	4496.69	480	4809.36	480	7973.95	480	6849.57
481	15813.8	481	13677.3	481	18076	481	14607.7	481	4397.76	481	4605.72	481	7286.88	481	6729.39
482	16645.9	482	14139.6	482	14507.1	482	13175.2	482	5096.78	482	5180.83	482	6606.18	482	5684.94
483	15770.9	483	14981.8	483	12149.5	483	12883.4	483	4960.39	483	5713.86	483	5326.73	483	4355.48
484	15230.7	484	15014	484	10937.6	484	12725.3	484	4088.27	484	6021.76	484	4404.3	484	4419.95
485	14039.9	485	13962	485	11626	485	10436.9	485	2924.55	485	4164.88	485	5286.32	485	5080.83
486	13201.1	486	14096.1	486	10898.5	486	9229.26	486	1746.79	486	2006.94	486	5948.52	486	5071.63
487	12161.9	487	12966.6	487	11200.8	487	9942.7	487	1890.82	487	1120.73	487	8034.26	487	6273.38
488	12826.8	488	13182.6	488	11923.4	488	9305.49	488	2750.41	488	2681.23	488	7923.9	488	5595.09
489	14276.4	489	13008.7	489	11489	489	9825.21	489	4686.21	489	4359.12	489	8455.12	489	6852.49
490	17084.7	490	13234.7	490	11600	490	11999	490	2301.6	490	1598.58	490	7809.17	490	7448.22
491	17154.1	491	13102.4	491	12004.4	491	10378.9	491	3194.26	491	2222.3	491	7325.16	491	6499.63
492	17049	492	14607.3	492	11851.8	492	8448.57	492	3578.49	492	3447.21	492	8542.66	492	7180.83
493	15666	493	11755.2	493	11141.7	493	6739.12	493	3204.73	493	2971.62	493	7849.14	493	5702.34
494	13233.6	494	9376.34	494	10337.5	494	8352.05	494	5034.64	494	6440.44	494	7319.26	494	5855.57
495	9904.32	495	7100.52	495	8866.72	495	9139.27	495	6591.39	495	8850.27	495	6836.4	495	5191.3
496	8874.42	496	7207.62	496	8559.52	496	8921.13	496	5491.51	496	6939.46	496	8157.1	496	6389.35
497	9270.69	497	7935.01	497	8682.75	497	8093.22	497	4273.17	497	4570.61	497	8639.69	497	8775.38
498	11411.2	498	10723	498	9109.22	498	7122.03	498	3649.43	498	3174.91	498	8482.2	498	8383.85
499	12803.5	499	11145.2	499	9275.59	499	7066.12	499	2753	499	2193.51	499	8876.47	499	8556.52
500	12316.3	500	11846.5	500	10769.1	500	8486.8	500	3422.01	500	2871.11	500	8980.85	500	7447.14
501	13078.7	501	11208	501	11773.8	501	9591.97	501	3167.72	501	3079.2	501	10000.4	501	7623.83
502	13741.2	502	11553.1	502	11943.5	502	10775.7	502	3478.78	502	2855.07	502	10690.7	502	9347.38
503	14984.2	503	12327.8	503	11060.8	503	11282.1	503	3122.72	503	3334.32	503	9170.35	503	9698.2
504	16280.1	504	12331.2	504	9565.69	504	10656	504	4278.54	504	5701.83	504	7884.45	504	9789.54
505	16857	505	14367.9	505	7986.41	505	9504.64	505	5067.44	505	7088.86	505	6680.08	505	8977.37
506	19177.3	506	17862.7	506	6440.13	506	7849.05	506	5981.03	506	7492.9	506	6177.69	506	8448.56
507	20607.4	507	18664.8	507	5366.07	507	7585.72	507	6175.47	507	8378.11	507	5133.34	507	7249.81
508	21338.5	508	19396.5	508	4349.58	508	6571.83	508	7045.45	508	9591.32	508	6399.05	508	8501.03
509	21629.3	509	20825.9	509	3899.05	509	4737.77	509	6615.07	509	10234.4	509	6953.31	509	9493.15
510	21001.3	510	23767.5	510	4571.41	510	3658.13	510	6385.82	510	8638.62	510	6602.3	510	6847.64
511	19669.6	511	17395.5	511	5711.87	511	4719.72	511	8394.1	511	10234.7	511	8195.09	511	8787.38
512	16620.1	512	11519	512	9434.81	512	7453.37	512	8315.08	512	10327.8	512	9738.16	512	9095.33
513	13214.5	513	8867.87	513	11732.8	513	9580.78	513	7512.62	513	9024.35	513	8173.75	513	7716.67
514	10120.9	514	8053.79	514	11875.2	514	9810.72	514	6925.44	514	8946.91	514	4669.23	514	4359.98
515	9528.05	515	8653.93	515	12719.8	515	11764.7	515	7198.58	515	10382.6	515	3659.64	515	3751.78
516	7824.52	516	7447.82	516	12086.3	516	9562.45	516	8119.93	516	11404.1	516	4015.7	516	5193.87
517	7194.89	517	7172.39	517	11479.6	517	9250.09	517	7801.55	517	11646.2	517	4206.6	517	5406.43
518	7172.54	518	7645.2	518	12054.5	518	10563.2	518	7843.59	518	11541.7	518	4675.25	518	5101.51
519	6258.31	519	6214.86	519	15478.1	519	11896.7	519	8787.5	519	11016.6	519	4783.03	519	4582.08
520	4064.87	520	3922.42	520	15681.6	520	12958	520	9123.3	520	11955.9	520	5629.44	520	3976.53
521	4819.09	521	5313.48	521	15051.4	521	12500.9	521	9037.03	521	13104.9	521	6456.5	521	4476.87
522	4813.01	522	5135.83	522	16760.4	522	12749.6	522	8696.29	522	13927.5	522	9362.54	522	7774.62
523	4366.05	523	4822.71	523	15805.5	523	14671.9	523	8657.71	523	13068.7	523	8197.65	523	6476.37
524	5816.14	524	7111.07	524	15966.9	524	17440	524	7805.76	524	11830.7	524	10293.2	524	7695.16
525	6022.06	525	5865.5	525	15557.1	525	16610.6	525	7239.71	525	10886	525	13439.5	525	12740.7
526	6481.67	526	5309.39	526	14314.2	526	15468	526	6643.63	526	9188.83	526	12612	526	11335.5
527	5640.68	527	4415.54	527	14064.6	527	13107	527	7104.6	527	9442.32	527	13272.1	527	13015.2
528	4704.36	528	4224.08	528	11798	528	9933.34	528	5897.67	528	7534.69	528	12184.7	528	11452.4
529	7144.31	529	6362.1	529	8851.53	529	7639.31	529	6303.56	529	8636.61	529	11483.9	529	10547.4
530	6816.95	530	6935.67	530	7241.48	530	7541.57	530	6022.1	530	7927.64	530	11600.4	530	12785.8
531	10868.1	531	9736.11	531	6099.32	531	7355.37	531	5256.21	531	6151.01	531	11019.1	531	10993.5
532	12679.1	532	11500.5	532	5575.47	532	8336.51	532	6382.24	532	6799.87	532	11125.5	532	13190.1
533	12789.1	533	9462.71	533	5551.16	533	7197.81	533	8699.47	533	10702.1	533	10302	533	12034.8
534	12478.1	534	10029.5	534	5402.27	534	5444.92	534	9025.74	534	13690.5	534	9048.08	534	10498.8
535	16881	535	15268.1	535	5096.58	535	4839.94	535	7388.33	535	11278.4	535	8275.08	535	11978.5
536	17230.3	536	15273.5	536	5462.82	536	5624.32	536	7803.46	536	11696.3	536	7759.08	536	10835.9
537	15763.7	537	13842.4	537	5933.4	537	6524.77	537	7216.1	537	12315.2	537	7014.32	537	9318.19
538	12694.6	538	10263.7	538	6427.25	538	7217.82	538	6745.07	538	10181.1	538	5201.47	538	7847.17
539	10758.3	539	8146.05	539	7173.54	539	6667.86	539	5796.21	539	9941.24	539	4949.16	539	6579.3
540	9213.1	540	6669.05	540	8204.15	540	8050.38	540	5892.26	540	10021.4	540	5351.8	540	7180.4
541	8033.64	541	4853.97	541	8578.16	541	8295.27	541	5300.13	541	9815.43	541	4869.38	541	6446.08
542	7460.81	542	5251.4	542	7651.84	542	6717.57	542	4919.58	542	9695.12	542	4472.44	542	5396.95
543	7732.98	543	7151.76	543	5823.65	543	5021.88	543	5944.34	543	11817.7	543	4809.71	543	4349.69
544	9621.52	544	9973.93	544	4860.05	544	4922.55	544	5959.69	544	12330.7	544	5221.42	544	3976.95
545	9285.2	545	10362.5	545	5307.76	545	6660.29	545	5868.13	545	8836.55	545	5444.57	545	4980.95
546	6139.64	546	5516.65	546	4810.44	546	5418.56	546	5514.12	546	7837.81	546	4862.01	546	6211.76
547	6281.95	547	5077.53	547	3715.24	547	3655.44	547	6711.08	547	8719.09	547	3158.48	547	3747.34
548	6174.66	548	5275.26	548	2884.8	548	3609.93	548	8364.24	548	12229.1	548	1640.89	548	1210.82
549	6316.43	549	5781.38	549	3146.66	549	4351.97	549	10265.5	549	16242.4	549	1007.95	549	742.105
550	6896.29	550	5791.85	550	4509.61	550	4206.79	550	10389.1	550	15457.2	550	153.382	550	273.934
551	7868.6	551	5730.42	551	6083.38	551	5414.88	551	9092.55	551	14776.7	551	87.242	551	67.056
552	8044.04	552	7369.33	552	6887.69	552	6817.63	552	6396.1	552	10443.8	552	127.958	552	827.392
553	8428.7	553	6756.76	553	6865.72	553	5901.18	553	6225.63	553	9719.59	553	702.431	553	1489.5
554	7792.72	554	6980.72	554	6049.19	554	4145.92	554	5572.62	554	9695.44	554	1674.69	554	3687.24
555	6349.82	555	5494.44	555	5008.08	555	2564.91	555	4932.57	555	8585.3	555	3381.02	555	6058.48
556	5690.69	556	4926.4	556	4402.32	556	3295.56	556	4657.88	556	9361.94	556	4736.69	556	6409.21
557	3963.64	557	3939.86	557	3411.41	557	4772.68	557	5618.68	557	10114.6	557	5904.07	557	7725.48
558	4453.65	558	4943.4	558	3032.53	558	5799.73	558	5131.94	558	8437.98	558	6327.8	558	6404.31
559	3702.32	559	3946.91	559	4957.66	559	6964.2	559	5041.61	559	8538.54	559	6134.22	559	7694.47
560	3495.3	560	3638.02	560	5674.7	560	5608.52	560	5054.31	560	8496.42	560	7200.15	560	8261.11
561	2781.71	561	2149.73	561	5971.16	561	6998.94	561	5900.54	561	8472.17	561	6725.77	561	8128.1
562	1853.79	562	1193.6	562	8563.07	562	9024.72	562	6018.49	562	8773.13	562	6203.8	562	7217.67
563	1115.1	563	964.191	563	10575	563	9998.84	563	6716.87	563	10443.1	563	5297.9	563	6431.99
564	356.377	564	541.302	564	9211.23	564	8972.56	564	6117.25	564	10441.1	564	4950.22	564	6305.14
565	492.283	565	889.676	565	9845.55	565	10574.8	565	5544.45	565	8447.95	565	5339.34	565	6485.54
566	1116.53	566	2463.24	566	8683.24	566	10206.5	566	5457.08	566	6655.4	566	6262.39	566	7029.34
567	2159.15	567	4344.95	567	7394.73	567	6671.76	567	5644.52	567	5561.7	567	6624.35	567	7312.05
568	2813.8	568	3761.48	568	6990.15	568	5386.82	568	11426.7	568	14952.3	568	6507.23	568	7468.04
569	2769.79	569	2849.42	569	8301.42	569	6437.06	569	10147	569	12631.9	569	6209.59	569	6602.75
570	2655.64	570	2663.89	570	8918.01	570	8463.88	570	9264.58	570	13097	570	5769.56	570	5273.71
571	3987.89	571	3848.17	571	9316.53	571	9198.61	571	13210.6	571	20110.7	571	6041.32	571	6986.57
572	4724.46	572	4508.54	572	8193.07	572	8485.64	572	10747.9	572	15838.2	572	5987.02	572	7286.87
573	5375.09	573	5274.8	573	7173.05	573	9684.41	573	9891.02	573	16303.5	573	6789.5	573	6330.8
574	6820.93	574	6591.57	574	5476.17	574	7727.02	574	8527.38	574	13438.8	574	6946.73	574	5897.73
575	6399.84	575	6637.81	575	4616.96	575	6214.88	575	7404.11	575	12923.5	575	7360.05	575	8074.4
576	5360.7	576	6544.57	576	3799.79	576	5892.13	576	7873.58	576	12565.5	576	7330.48	576	8329.4
577	3557.27	577	4878.08	577	4592.59	577	6512.34	577	8757.26	577	12112.5	577	6584.23	577	7632.05
578	3234.37	578	5108.29	578	4943.58	578	7103.72	578	9436.79	578	11030.1	578	5277.66	578	5450.25
579	3565.6	579	5039.89	579	6415.45	579	8650.54	579	10348.3	579	11815.3	579	5733.91	579	5640.62
580	4333.73	580	4702.44	580	6284.4	580	8925.13	580	11972.3	580	14386.7	580	5482.78	580	6133.35
581	5487.56	581	5517.14	581	6236.83	581	8794.74	581	13092.5	581	18629.9	581	5727.56	581	5964.7
582	6343.84	582	6682.27	582	5427.94	582	8872.58	582	11269.7	582	14267.5	582	7527.98	582	8759.6
583	7046.71	583	7514.14	583	4079.74	583	7406.34	583	10394.1	583	13221.3	583	8208.64	583	9478.87
584	6981.16	584	7019.24	584	4815.79	584	4600.2	584	7418.42	584	8967.77	584	7063.27	584	7911.57
585	7829.02	585	7037.27	585	6041.23	585	5641.48	585	6073.97	585	6768.07	585	7961.84	585	9869.03
586	9196.47	586	8675.74	586	7313.75	586	6869.31	586	6741.03	586	7765.47	586	6432.65	586	6902.36
587	9331.14	587	8530.23	587	5953.81	587	4873.1	587	8129.62	587	9807.49	587	4627.46	587	7140.68
588	11081.1	588	10694	588	8260.39	588	9613.52	588	8676.4	588	10435.5	588	4830.35	588	5890.73
589	10519.9	589	9101.38	589	7523.47	589	9089.71	589	8373.2	589	7023.99	589	4417.52	589	5219.94
590	8770.09	590	7428.22	590	6997.72	590	10765.7	590	5352.25	590	3452.38	590	3178.71	590	4750.18
591	7089.11	591	6745.68	591	5557.26	591	11123.1	591	3635.32	591	1507.12	591	3455.07	591	4917.45
592	6366.56	592	5700.55	592	3419.64	592	7718.95	592	2195.37	592	702.699	592	4075.47	592	4601.01
593	6033.6	593	6434.25	593	4835.44	593	4862.04	593	1230.36	593	1781.89	593	6160.46	593	7393.28
594	7345.55	594	8803.68	594	5251.14	594	4803.79	594	1213.86	594	2131.45	594	9241.45	594	11528.3
595	8415.61	595	10071	595	8948.22	595	8429.87	595	1496.84	595	2987.06	595	12122.2	595	14169.2
596	8467.45	596	10215.9	596	8982.82	596	8979.99	596	3515.57	596	5297.29	596	11174.7	596	11859.4
597	7711.36	597	9758.25	597	10400	597	9149.26	597	5043.34	597	8651.32	597	10592.1	597	10271.1
598	7853.55	598	10145.4	598	10965.4	598	13357.3	598	5965.08	598	9602.15	598	9656.57	598	9608.34
599	8182.15	599	9691.15	599	10594.9	599	12272.9	599	6657.55	599	9610.43	599	9170.4	599	8989.54
600	9230.79	600	10579.3	600	11205.5	600	12035.6	600	7594.04	600	10534.2	600	8613	600	8344.76
601	7631.37	601	9232.57	601	9755.79	601	13194.2	601	6431.63	601	7289.06	601	9390.88	601	10276.7
602	7203.91	602	8946.82	602	8921.11	602	12328	602	4345.81	602	6272.64	602	9505.43	602	11500.9
603	7874.46	603	10220.5	603	7541.63	603	8850.08	603	4437.2	603	5490.19	603	9883.82	603	12850.4
604	8757.43	604	10939.1	604	7365.71	604	9627.83	604	3649.33	604	4998.97	604	10816.1	604	14872.2
605	10017.4	605	12668.6	605	8080.01	605	12762.9	605	4188.21	605	5765.4	605	15694.4	605	23753.3
606	9852.93	606	11261.8	606	5782.47	606	9817.85	606	5004.26	606	7420.14	606	16822.6	606	24085.1
607	8984.23	607	8718.62	607	7559.09	607	11786.6	607	5673.07	607	7209.45	607	17651.1	607	22990.8
608	8427.75	608	8720.02	608	6845.61	608	10213.6	608	5938.7	608	6815.52	608	19534.6	608	20708.4
609	7466.86	609	7097.78	609	8473.92	609	8994.56	609	6407.28	609	5957.57	609	18908.6	609	18932
610	6815.44	610	6736.15	610	8706.31	610	9344.92	610	7756.82	610	6697.39	610	19110.6	610	20913.5
611	6059.03	611	6914.62	611	9347.23	611	7737.57	611	7241.87	611	6166.69	611	18675.2	611	18645.7
612	5978.12	612	7050.29	612	9290.34	612	7556.88	612	6653.8	612	5928.24	612	18381.6	612	20393.7
613	5753.48	613	6292.89	613	8658.62	613	9132.38	613	9768.92	613	10082	613	16783.1	613	19983.8
614	5270.48	614	5253.57	614	7895.77	614	8167.72	614	10557.4	614	11207.8	614	16720.5	614	21368.2
615	5013.63	615	4936.9	615	8004.54	615	6950.97	615	9260.19	615	9110.94	615	16445.9	615	22732.8
616	4541.88	616	4691.2	616	7677.81	616	6866.89	616	6978.46	616	6964.99	616	15839.5	616	21327.5
617	4549.88	617	3654.79	617	8193.53	617	7727.62	617	7476.68	617	8875.82	617	15834.5	617	21815.8
618	4320.04	618	4759.88	618	6929.02	618	6536.85	618	6534.53	618	8199.49	618	14981.5	618	20010.3
619	5383.7	619	4995.74	619	6944.7	619	7315.23	619	5582.38	619	7329.03	619	14348.4	619	18880.5
620	6343.31	620	6069.53	620	7494.14	620	6985.9	620	4313.85	620	6609.64	620	15326.4	620	19619.8
621	7076.4	621	6966.88	621	8063.22	621	9479.78	621	4193.45	621	5859.27	621	13898.4	621	15721.5
622	9867.72	622	9944.97	622	7909.1	622	8638.96	622	4365.08	622	5648.12	622	12887.3	622	14072.6
623	11174.1	623	10525.7	623	8498.95	623	12485.8	623	5494.31	623	6736.13	623	12513.7	623	14477.4
624	11939.9	624	9696.34	624	8492.89	624	12446.3	624	5735.25	624	8462.85	624	12169.7	624	15568.1
625	11714.6	625	11541.3	625	6964.11	625	12507.6	625	8235.52	625	9723.76	625	12527	625	14978.4
626	10572.5	626	10024.2	626	5921.15	626	9369.51	626	9077.16	626	10187	626	12987.2	626	14804
627	8730.69	627	9002.81	627	4889.32	627	5599.79	627	11947.6	627	11701.3	627	13769	627	15643.9
628	8500.77	628	9268.15	628	5050.19	628	4699.69	628	12033.8	628	12562.7	628	12518.7	628	13143.5
629	9143.38	629	10553.8	629	5541.46	629	5534.27	629	12789.8	629	15970.1	629	11816.1	629	13776.5
630	8619.92	630	9775.59	630	7261.34	630	6779.97	630	13620.4	630	21327.7	630	10934.6	630	13162.9
631	6951.08	631	8884.79	631	8117.9	631	10596	631	13609.9	631	20126.3	631	10521.6	631	12668.5
632	7010.6	632	8661.47	632	7743.81	632	9844.7	632	12317.7	632	18522.3	632	8226.58	632	10366
633	6142.52	633	7341.88	633	6807.26	633	8768.46	633	10095.3	633	14116.5	633	8182.57	633	9461.83
634	5825.2	634	7469.63	634	7333.15	634	7984.01	634	10199.8	634	13463.9	634	10028.1	634	13013.6
635	5983.45	635	7489.48	635	8134.62	635	7799.15	635	11208	635	14530.2	635	9300.51	635	9836.56
636	6848.11	636	8017.51	636	7469.15	636	9893.62	636	10698.5	636	13844	636	8490.52	636	10149.3
637	8033.6	637	8507.94	637	7880.3	637	10691.6	637	10018.9	637	12522.5	637	7459.7	637	9787.42
638	8888.85	638	9316.31	638	7773.6	638	9680.99	638	11118.3	638	14369.9	638	8906.1	638	9484.56
639	9171.77	639	10699.8	639	8116.27	639	11566.4	639	9614.94	639	12856	639	9382.25	639	10012.9
640	9341.92	640	10081.6	640	10006.3	640	11743.1	640	8632.18	640	9995.21	640	10148.1	640	10979.8
641	9595.86	641	10724.7	641	11601.9	641	12295	641	9524.21	641	8951.8	641	10536.6	641	10219.6
642	8652.01	642	9502.51	642	13137.4	642	11850.6	642	11274.3	642	10320.1	642	9760	642	7951.83
643	9257.44	643	10715.3	643	14408.3	643	12875.1	643	8832.1	643	8023.34	643	11298.8	643	11864.3
644	8787.23	644	8492.03	644	15033.2	644	11247.8	644	10042.5	644	10447.7	644	10225.5	644	11625.5
645	9066.11	645	9272.37	645	17604.2	645	14456.8	645	11202	645	13069.4	645	10013.7	645	12152.7
646	10391.9	646	10755.1	646	16237.8	646	12152.8	646	8772.53	646	9183.79	646	8453.09	646	9201.82
647	11300.8	647	12521.4	647	16848.3	647	16019	647	5131.75	647	5193.11	647	8242.78	647	8796.27
648	12580.5	648	13281.3	648	15118.6	648	12780.3	648	5300.64	648	3887.32	648	7152.09	648	8034.18
649	14274.1	649	14170.1	649	12719.1	649	8645.71	649	5794.97	649	4683.51	649	6560.71	649	8223.05
650	14788.4	650	14255.7	650	13363.4	650	10086.7	650	6928.62	650	7315.02	650	6818.54	650	8373.66
651	14116.5	651	10926.9	651	15350.3	651	13851	651	6843.23	651	5221.25	651	8548.8	651	7414.71
652	13894.7	652	12787.3	652	14322.8	652	7882.65	652	7633.03	652	8060.58	652	9280.53	652	7915.69
653	14674	653	14121.2	653	14015.4	653	8726.41	653	4740.43	653	6358.24	653	9179.39	653	8408.23
654	13026.4	654	12158.7	654	16828.2	654	11967.8	654	3866.85	654	4959.75	654	8297.49	654	9569.91
655	12675.6	655	12356	655	15862.1	655	8751.15	655	2762.48	655	3062.35	655	11301	655	10774.6
656	11373.4	656	11724	656	19622	656	12938.9	656	985.263	656	1012.47	656	11386.4	656	9420.33
657	10196.9	657	9715.96	657	21945.2	657	19963.9	657	1556.74	657	1183.09	657	11581.2	657	9686.22
658	9490.44	658	9634.72	658	21874.2	658	12927.4	658	2862.81	658	2921.92	658	11659.3	658	11197.7
659	9595	659	10866.9	659	22423.9	659	20242.6	659	6341.62	659	7144.17	659	9642.89	659	9440.3
660	10233.2	660	11737	660	21347.1	660	25166.9	660	9673.81	660	12997.6	660	8138.39	660	6955.12
661	9573.68	661	10668.7	661	19561.3	661	24031.8	661	11402.2	661	15507.5	661	11424.1	661	9513.69
662	9847.69	662	9803.61	662	18364.8	662	23424.8	662	10607.7	662	15692.1	662	11721.7	662	10407.1
663	9347.07	663	9426.44	663	20110.5	663	21755.5	663	8936.12	663	11551.5	663	11458.7	663	11108.9
664	8491.18	664	8376.46	664	20056.3	664	22569.6	664	11163.4	664	16014.7	664	10322.4	664	11288.2
665	7111.52	665	7160.91	665	21095.1	665	21805.7	665	7602.11	665	10488.8	665	9778.54	665	10246.5
666	6738.28	666	7800.63	666	20881.2	666	23133.6	666	7801.52	666	9098.12	666	8596.91	666	8113.74
667	5781.02	667	7317.01	667	23601.6	667	24666.7	667	7750.97	667	8030.45	667	7902.69	667	7362.33
668	5903.66	668	7308.9	668	20929.6	668	20631.7	668	7473.69	668	9403.01	668	9095.1	668	7934.71
669	6202.4	669	7389.02	669	19228.7	669	19323.5	669	7877.22	669	10768.7	669	6663.2	669	6142.46
670	7100.67	670	8806.89	670	19557.6	670	17713.9	670	7738.42	670	11091.1	670	7861.02	670	7756.96
671	7891.48	671	9294.86	671	16512	671	14046.1	671	7528.16	671	11186.2	671	8859.42	671	8805.34
672	9050.48	672	10438.9	672	15193.9	672	12178.4	672	7916.29	672	10575.9	672	7630.75	672	7115.65
673	9086.08	673	10405	673	17259.2	673	15047.6	673	8330.11	673	11123.7	673	7109.77	673	5444.99
674	9171.04	674	9451.97	674	17749.6	674	16087.5	674	6889.68	674	9415.22	674	11630.5	674	11116.5
675	9292.94	675	8421.11	675	17751.7	675	11803.2	675	7971.1	675	10743.6	675	9079.05	675	7574.57
676	9909.05	676	9441.46	676	18302.3	676	12572.6	676	7998.55	676	10721.5	676	10673.5	676	9432.22
677	11171.2	677	9693.72	677	21661.7	677	16626.6	677	6489.2	677	8551.55	677	11941.9	677	10442.3
678	11906.5	678	10243.9	678	22338.3	678	17877	678	6458.76	678	9987.44	678	10897.6	678	9669.06
679	11717.1	679	9437.7	679	22656.4	679	17988.9	679	5506.56	679	7934.93	679	12407.1	679	11719.7
680	12378	680	10607.9	680	21748.7	680	14415.3	680	5360.88	680	9283.06	680	10887.6	680	10569.3
681	10711.8	681	9447.53	681	22272.1	681	15400.6	681	4154.96	681	5200.22	681	9388.98	681	7854.17
682	11494.4	682	9064.99	682	24245.1	682	18079.6	682	3940.52	682	3914.38	682	11508.1	682	9589.62
683	11253	683	8877.28	683	27876.3	683	19079	683	5661.27	683	4392.19	683	10594.1	683	9955.51
684	9890.76	684	8391.59	684	22706.7	684	15196.3	684	6707.08	684	6306.66	684	9476.68	684	9342.77
685	9431.31	685	8461.72	685	25613.2	685	18150.1	685	8351.46	685	7440.77	685	8581.49	685	8743.01
686	8194.3	686	7666.86	686	28450	686	19438.7	686	6621.72	686	4877.93	686	10639.4	686	11277.5
687	8406.14	687	9248.19	687	24926.4	687	13887.8	687	6559.93	687	5569.23	687	9986.27	687	10436.5
688	8561.26	688	11001.6	688	28117.1	688	16450.8	688	10339.7	688	8823.79	688	10875.2	688	12039.4
689	7673.52	689	10657.6	689	20221.2	689	10578.6	689	11078.2	689	11024.3	689	10274.9	689	11828.7
690	7049.8	690	9274.71	690	26503.5	690	13620.6	690	10141.7	690	9433.16	690	10767.1	690	12445.2
691	6643.9	691	7592.93	691	28495	691	18488.6	691	9689.66	691	10221.3	691	9287.44	691	10227.9
692	6948.71	692	9389.16	692	20031.1	692	10437	692	7125.56	692	7778.63	692	7604.69	692	7468.57
693	10870.7	693	11666.4	693	24355.7	693	14629.8	693	4499.82	693	7630.82	693	10592.9	693	11619.1
694	9818.69	694	8869.67	694	25365.8	694	18948.8	694	5190.47	694	8956.7	694	9054.19	694	9017.99
695	9345.01	695	9785.01	695	22512	695	14503.1	695	5288.52	695	9078.07	695	9955.91	695	9292.33
696	9857.82	696	10593.7	696	23946.9	696	19200.4	696	4463	696	7760.71	696	8365.13	696	7949.06
697	10729.7	697	11685.2	697	23072.9	697	20485.1	697	3323.62	697	3633.85	697	9404.95	697	10174.6
698	11532.1	698	10357.9	698	22929.3	698	21344.5	698	4098.29	698	3496.82	698	11436.2	698	12981.1
699	10634.9	699	9176.15	699	23150.5	699	19496.1	699	5075.31	699	4452.43	699	8444.58	699	9478.48
700	10305	700	8775.5	700	26205.4	700	25104.7	700	6415.45	700	9548.93	700	5977.75	700	7273.24
701	10116.9	701	9625.84	701	27518	701	17088	701	8314.02	701	14305.7	701	7637.68	701	9141.08
702	10302.3	702	10044.5	702	29212.2	702	21082.7	702	10743.1	702	16689.5	702	7821.28	702	8962.41
703	10039.4	703	11850.5	703	29337.6	703	23639.9	703	10631.1	703	15048.3	703	7671.21	703	7879.93
704	11082.1	704	10734.2	704	28946.8	704	16609.6	704	10056.9	704	12474.8	704	10100.1	704	10614.7
705	10513.9	705	8544.44	705	27956.9	705	21199.9	705	10841.8	705	14172.7	705	9125.52	705	8963.27
706	14110.1	706	11195	706	27503.6	706	20516.4	706	9826.1	706	11172	706	8636.72	706	8759.21
707	11408.2	707	8531.51	707	27944.7	707	22375.9	707	10857.3	707	10007.1	707	11048.8	707	12323.4
708	12233.6	708	9710.55	708	26938	708	13460.9	708	11364.6	708	9812.25	708	9787.86	708	9560.85
709	15686.7	709	14051.4	709	26778.5	709	18620.9	709	11737	709	11106.5	709	10278	709	10013.8
710	14890.9	710	14118.9	710	24904.2	710	20900.4	710	11290.5	710	13189.5	710	11615.8	710	12601.9
711	15919.9	711	13587.3	711	28071.6	711	14752.7	711	10662.9	711	14430.4	711	10874	711	10475.3
712	17897.9	712	16775.2	712	26132	712	18627.3	712	10601.7	712	9914.36	712	11482.5	712	11072.9
713	17893.3	713	15674.1	713	23630.9	713	22906.8	713	10585.9	713	12021.7	713	12372.1	713	11805.7
714	16920.8	714	13932.9	714	26946.4	714	19599.7	714	13406.1	714	12179.2	714	12995.1	714	11387.2
715	17996.9	715	16215.8	715	24656.2	715	22448	715	14422.8	715	14463.5	715	11694.4	715	10895.4
716	14915.7	716	14705	716	23495.7	716	19651.8	716	14672.4	716	15020	716	10999.4	716	10329.4
717	12382.7	717	14049.5	717	22310.6	717	18818.9	717	15363.7	717	15528.6	717	10253.9	717	9503.81
718	14180.6	718	15409.3	718	20116.7	718	19206.3	718	14656.1	718	13901.2	718	8512	718	9351.54
719	11564.4	719	12145.9	719	23604.6	719	19287.8	719	14173.2	719	15181.6	719	8965.07	719	9791.32
720	11746.3	720	11738.3	720	21177.3	720	19571.1	720	12945.3	720	14259.6	720	9823.72	720	11298.9
721	9916.45	721	9401.32	721	20646.9	721	18561.9	721	11467.2	721	13238.2	721	8496.12	721	9530.98
722	10699.1	722	10152.4	722	22909.4	722	19534.9	722	9154.21	722	9572.68	722	9092	722	11279.1
723	8205.32	723	6869.6	723	22943.3	723	22264.4	723	6140.3	723	5046.03	723	8498.5	723	10672.2
724	8646.76	724	6677.57	724	21468.5	724	23255.1	724	5209.46	724	4904.91	724	8000.61	724	9283.83
725	10184	725	7549.44	725	23940.5	725	23958.7	725	4906.54	725	4229.4	725	6796.76	725	7901
726	11869.6	726	9102.18	726	21857.5	726	23930.4	726	5199.14	726	4114.37	726	6130.26	726	6116.35
727	8867.88	727	8422.73	727	20863.4	727	22911.4	727	4919.19	727	4019.3	727	5203.43	727	5278.11
728	7006.18	728	6445.92	728	18174.6	728	21914.2	728	5161.2	728	2852.42	728	3774.8	728	4156.24
729	5250.16	729	4708	729	16724.2	729	20706.6	729	5033.63	729	3571.11	729	2763.68	729	3677.43
730	5057.18	730	3908.79	730	17148.2	730	20684.4	730	5422.47	730	5245.1	730	2221.8	730	4746.78
731	5875.03	731	4708.4	731	14106.7	731	19818.2	731	7578.51	731	8238.71	731	2341.46	731	4862.34
732	4754.45	732	5156.93	732	14449.8	732	20454.9	732	7912.04	732	9841.61	732	2449.94	732	4675.22
733	6208.05	733	4851.7	733	16060.3	733	20273.4	733	6430.56	733	6176.13	733	3803.41	733	3978.92
734	6223.68	734	5464.82	734	22130.6	734	20497.2	734	7914.25	734	5923.37	734	4733.12	734	5051.03
735	7592.11	735	5440.54	735	20509.5	735	15933.8	735	8964.96	735	10008.1	735	5057.69	735	4312.52
736	8057.2	736	4661.98	736	21757.5	736	15579.6	736	7996.34	736	9164.39	736	5238.11	736	5092.19
737	7313.07	737	5541.77	737	21135.6	737	13509.2	737	12067.8	737	15526.6	737	5077.94	737	5202.27
738	6614.71	738	4912.43	738	22256.8	738	15642	738	10995	738	12643.6	738	4435.73	738	5256.57
739	5401.96	739	4073.84	739	22350	739	15142.9	739	10747.9	739	13281.1	739	4548.2	739	4388.55
740	5282.85	740	4686.44	740	23951	740	14309.4	740	10512.7	740	12480.4	740	4466.54	740	4210.96
741	5622.95	741	5434.14	741	22188.5	741	14439.5	741	10430.4	741	8035.52	741	4054.14	741	3590.28
742	5046.41	742	5110.69	742	20451.9	742	13303	742	12725.6	742	12580.4	742	4351.65	742	5209.26
743	5556.65	743	5601.88	743	23950.7	743	15288.4	743	12000.8	743	12783.3	743	4696.3	743	5154.91
744	4684.55	744	6929.58	744	24971.7	744	15896.3	744	12190.5	744	12201.5	744	4757.29	744	4155.7
745	4246.51	745	6871.34	745	23227.2	745	13072.6	745	12981.7	745	14324.8	745	4078.8	745	3582.82
746	3612.58	746	5600.74	746	23020.7	746	13032.4	746	14261.3	746	17254.5	746	3438.99	746	2923.02
747	4219.03	747	6240.88	747	22831.7	747	14805.7	747	14372.7	747	18399.3	747	2862.04	747	2285.84
748	3933.84	748	6488.12	748	21332.7	748	15092	748	14049.4	748	17962.4	748	4503.89	748	4196.02
749	4053.3	749	6525.11	749	21258.7	749	13922	749	12728.8	749	17801	749	3585.81	749	3594.23
750	4667.57	750	6987.49	750	20577.8	750	11687.9	750	13839.6	750	20485.4	750	3035.66	750	2489.01
751	5269.58	751	6316.28	751	24077.7	751	12975.8	751	14035.3	751	23638.3	751	2306.8	751	1895.21
752	5719.43	752	6252.67	752	20990.4	752	8683.71	752	11892	752	20451.6	752	3049.53	752	1834.75
753	5548.18	753	5709.84	753	16902.5	753	7048.83	753	10235.6	753	17199.5	753	2865.87	753	1827.27
754	4833.38	754	4870.15	754	16638.5	754	6926.28	754	11524.8	754	19222.2	754	1721.68	754	965.274
755	4968.43	755	5938.44	755	12452.8	755	5587.39	755	9711.49	755	15349.1	755	1834.44	755	1832.05
756	4293.85	756	5669.9	756	8251.85	756	5145.59	756	8936.28	756	13404.8	756	2248.87	756	1989.74
757	4030.73	757	4451.76	757	5831.8	757	5546.15	757	9053.25	757	13145.6	757	3375.35	757	2199.89
758	3646.79	758	4178.06	758	5806.3	758	7517.09	758	9767.24	758	15009.4	758	2883.66	758	1868.79
759	3101.99	759	4020.69	759	8025.68	759	6452.48	759	9426.92	759	14354.4	759	1995.71	759	1193.2
760	3657.06	760	4275.48	760	7415.49	760	7794.11	760	9171.73	760	13305.3	760	3928.14	760	2962.05
761	4718.63	761	6529.13	761	8326.3	761	7445.1	761	8707.44	761	13240.6	761	2919.92	761	1953.71
762	5908.26	762	8052.06	762	11186	762	10234.2	762	8454.75	762	12319.2	762	5825.01	762	5516.6
763	7860.83	763	9673.2	763	12558.7	763	11936.8	763	8959.22	763	12337	763	6075.33	763	5814.09
764	8845.17	764	10297.1	764	14052	764	13936.5	764	8052.68	764	10799.4	764	6740.17	764	7283.06
765	10392.2	765	12489.5	765	12665.6	765	11680.3	765	8285.57	765	9585.58	765	6141.32	765	8331.11
766	11027.9	766	12567.3	766	13598.4	766	11939.9	766	7411.89	766	10497.7	766	5821.57	766	7998.42
767	10666.5	767	12603	767	13632.9	767	11484.1	767	7593.25	767	10712	767	2570.64	767	3726.37
768	9871.82	768	10253.3	768	12848.4	768	12223.8	768	6503.92	768	8464.68	768	4106.46	768	5806.3
769	9087.88	769	11167.2	769	12924.4	769	12259.2	769	8241.35	769	11334.8	769	3202.7	769	4899.43
770	6624.92	770	7295.99	770	10089.3	770	10267.6	770	8333.7	770	9915.31	770	2470.13	770	3079.15
771	4808.01	771	4083.08	771	10218.1	771	11170.4	771	10509	771	14037.2	771	3993.16	771	5055.05
772	4319.04	772	3251.02	772	11010.2	772	10783.3	772	9067.2	772	11294.7	772	3488.14	772	2805.26
773	4431.08	773	3445.74	773	10499.2	773	8589.84	773	10776.4	773	11897.6	773	5095.2	773	3842.51
774	6198.77	774	6045.58	774	10021	774	8497.88	774	10314.7	774	11251.3	774	8460.21	774	7292.12
775	5634.73	775	6564.27	775	9571.44	775	9803.44	775	10470.3	775	13713.4	775	6316.64	775	7188.32
776	5932.24	776	6117.65	776	10390.8	776	10337.7	776	10400.3	776	14317.3	776	5594.73	776	6943.7
777	5251.09	777	5922.08	777	10204	777	9874.45	777	9486.07	777	11763.5	777	4734.75	777	6374.36
778	4403.14	778	5178.71	778	10862.8	778	11970.6	778	10174.3	778	12336.6	778	5677.81	778	6124.16
779	3583.06	779	3958.89	779	10388	779	9543.99	779	8835.97	779	10324.2	779	6274.18	779	5448.18
780	3540.97	780	3528.41	780	10199.2	780	11368.8	780	9110.48	780	10809.4	780	6828.68	780	6123.39
781	3636.7	781	3869.52	781	10748.6	781	10204.5	781	8618.03	781	10924.8	781	7501.4	781	6243.94
782	5347.68	782	4389.05	782	11835	782	11190.1	782	7371.56	782	8752.07	782	7551.07	782	6236.36
783	7206.77	783	6224.42	783	12147.2	783	11562	783	9381.59	783	10977.7	783	8061.31	783	7588.79
784	8047.44	784	6749.93	784	11357.4	784	12437.3	784	7881.95	784	8984.45	784	6634.28	784	7614.8
785	7035.06	785	5937.9	785	12150.3	785	13047.3	785	6334.62	785	6891.07	785	6855.61	785	8570.37
786	7190.24	786	6198.73	786	13187.5	786	12267.8	786	5704.99	786	5758.27	786	7036.54	786	8906.68
787	5416.68	787	4234.97	787	13590.1	787	13364.4	787	5787.11	787	5814.66	787	7951.78	787	9902.67
788	3831.64	788	4696.95	788	14551.1	788	12763.2	788	5913.17	788	5454.85	788	7878.26	788	8472.04
789	3478.22	789	4478.26	789	14656.8	789	13175.3	789	7518.03	789	9980.56	789	8539.01	789	9104.87
790	3376.42	790	4663.64	790	14222.4	790	13253.8	790	8390.82	790	12524.1	790	9546.86	790	10895
791	3819.2	791	5866.19	791	11731.6	791	10832.6	791	9285.82	791	13812.3	791	10352.7	791	9677.98
792	3203.17	792	5584.37	792	11413.2	792	10957.2	792	8732.55	792	12677.2	792	10158.8	792	8326.11
793	4133.51	793	6056.39	793	11385.3	793	11789.8	793	7489	793	11648.8	793	9940.02	793	8206.25
794	4909.21	794	8019.59	794	9682.65	794	8351.52	794	7311.19	794	10360.8	794	8174.46	794	7778.92
795	4958.49	795	7524.2	795	8513.3	795	8018.86	795	5485.23	795	8389.22	795	7546.74	795	8770.62
796	5101.27	796	7173.78	796	8484.01	796	8227.77	796	4579.56	796	7208.52	796	7039.9	796	8573.94
797	5149.37	797	7357.56	797	8260.84	797	7196.34	797	4425.47	797	5804.82	797	7818.73	797	9515.3
798	5507.8	798	6125	798	8282.86	798	7660.77	798	3788.95	798	5220.98	798	7748.79	798	9276.96
799	5100.59	799	5462.02	799	9353.36	799	7071.89	799	3139.1	799	4534	799	7850.86	799	9568.89
800	4676.55	800	6103.72	800	9179.96	800	8125.99	800	3000.59	800	4286.98	800	7888.83	800	9405.57
801	6786.62	801	10516	801	9520.98	801	7997.73	801	2725.51	801	3819.62	801	8012.87	801	9651.91
802	8000.86	802	10204	802	9888.32	802	7542.24	802	3209.61	802	4828.67	802	8604.16	802	8675.58
803	7283.02	803	8101.33	803	8376.62	803	7976.21	803	3278.67	803	4777.34	803	8289.58	803	8118.61
804	5819.25	804	6361.37	804	8942.13	804	8856.33	804	4142.22	804	5421.31	804	7255.05	804	7294.66
805	7171.69	805	7838.89	805	8859	805	7137.47	805	4305.69	805	5664.8	805	8918.98	805	9438.89
806	6199.79	806	7607.44	806	8066.55	806	6701.12	806	4357.23	806	6870.63	806	9285.75	806	9362.77
807	7179.56	807	7659.58	807	8642.48	807	7996.27	807	4351.57	807	6693.8	807	7913.89	807	7103.3
808	5313.73	808	6564.36	808	8483.9	808	7122.93	808	5393.74	808	6459.27	808	6962.84	808	7734.08
809	6257.88	809	7428.98	809	8701.65	809	6888.22	809	8246.64	809	8358.32	809	5191.38	809	6056.98
810	5722.73	810	6202.59	810	9954.13	810	8841.54	810	5715.77	810	5693.79	810	3156.67	810	4333.1
811	7752.27	811	7264.48	811	10395.3	811	8222.54	811	4933.28	811	5296.09	811	3846.7	811	5901.53
812	9389.89	812	9347.08	812	11583.3	812	8752.29	812	4410.47	812	5292.73	812	3476.65	812	5381.35
813	9963.26	813	9562.52	813	12416.6	813	9612.32	813	5315.05	813	6726.22	813	2714	813	4135.9
814	8526.95	814	7856.02	814	12084.9	814	8877.2	814	5672.06	814	7710.99	814	4752.37	814	5963.42
815	7486.81	815	5615.6	815	12838.4	815	9773.62	815	5607.02	815	7971.93	815	3687.26	815	4597.39
816	8780.24	816	7930.05	816	12100.5	816	8896.6	816	5917.55	816	7006.35	816	3235.78	816	4479.19
817	10717.7	817	8939.16	817	12357.2	817	10054.5	817	5202.04	817	6535.56	817	3313.58	817	3558.68
818	12030.8	818	11072.7	818	12663.8	818	11755.8	818	4343.37	818	5216.72	818	3228.08	818	3931.3
819	11289.2	819	14354.4	819	12925	819	11824.8	819	4738.59	819	6091.32	819	4749.27	819	5088.82
820	8616.88	820	11680.3	820	13908.3	820	11197	820	4096.02	820	5881.74	820	5183.02	820	7300.05
821	7770.85	821	10039.3	821	15126	821	11144.1	821	4584.95	821	7381.32	821	5482.98	821	6844.02
822	6577.74	822	6880.4	822	16938.2	822	10725	822	4836.54	822	7463.57	822	5130.9	822	6542.8
823	4901.06	823	4344.89	823	16107	823	8599.61	823	5493.66	823	8616.21	823	5111.44	823	7156.72
824	5188.17	824	4063.91	824	15428.5	824	7802.89	824	5688.74	824	8278.72	824	5133.77	824	7673.52
825	5774.79	825	5284.2	825	15470.3	825	9429.97	825	5666.45	825	7166.66	825	5122.46	825	7111.8
826	6821.25	826	6699.89	826	15013.6	826	9211.89	826	5929.82	826	7732.21	826	5754.23	826	7837.21
827	5317.15	827	4193.42	827	15099.7	827	12988	827	6021.05	827	7235.46	827	6231.41	827	6731.68
828	4887.75	828	3926.13	828	14481.8	828	11672.4	828	5604.05	828	6630.49	828	8540.26	828	8974.06
829	3788.04	829	3958.27	829	15131.9	829	11667.9	829	4872.94	829	6838.55	829	7013.95	829	6312.02
830	2582.74	830	2574.69	830	13857.4	830	10227.7	830	4672.6	830	6481.01	830	9297.83	830	9130.92
831	3570.57	831	3633.48	831	15106.7	831	11246	831	4378.56	831	6309.34	831	7745.01	831	7866.8
832	3093.37	832	2026.27	832	15220.9	832	10640.5	832	4152.82	832	5328.79	832	7427.57	832	7573.46
833	3000.2	833	1722.23	833	14502.5	833	9323.52	833	3675.16	833	6454.01	833	6755.17	833	7381.98
834	4030.83	834	2218.49	834	14542.6	834	9654.93	834	4381.49	834	7642.96	834	7530.71	834	7505.83
835	5152.4	835	3812.62	835	14898.5	835	9555.53	835	4641.41	835	8427.74	835	7613.61	835	7768.15
836	6756.87	836	6228.83	836	15359.8	836	10532.7	836	4275.91	836	7880.75	836	7706.56	836	8492.22
837	6891.89	837	6135.43	837	15195.7	837	9451.44	837	4255.01	837	7882.87	837	6320.08	837	7023.43
838	9509.42	838	8127.38	838	15106	838	9261.99	838	4140.48	838	6940.78	838	5199.86	838	6383.74
839	11571.2	839	9567.04	839	15390.4	839	10610	839	4444.21	839	6738.02	839	4601.24	839	6392.93
840	11386.5	840	9831.09	840	14912.4	840	9543.03	840	4361.06	840	6129.9	840	3892.49	840	5162.77
841	14652.5	841	12572	841	14554.6	841	9696.1	841	4614.75	841	6095.8	841	3368.07	841	4786.71
842	14064.2	842	12609.1	842	14472.4	842	9289.57	842	4517.83	842	6282.81	842	2640.68	842	3188.02
843	16552.3	843	14049.3	843	14923.4	843	9958.26	843	5308.09	843	7718.97	843	2906.94	843	3067.05
844	13453.9	844	11815.2	844	14681.7	844	10564.3	844	5564.1	844	7383.78	844	4133.6	844	3380.91
845	12965.2	845	11272.4	845	14342.5	845	10125.9	845	5345.32	845	6348.99	845	5350.59	845	5485.71
846	11568	846	10316.5	846	15078.7	846	11592	846	5557.62	846	6810.98	846	5894.77	846	6320.61
847	11791.1	847	9059.5	847	15342.1	847	11492.1	847	5352.43	847	8376.19	847	5439.63	847	5379.31
848	11679	848	9253.34	848	14736.8	848	11537.4	848	4914.18	848	7759.54	848	4214.94	848	4195.38
849	11166	849	8657.3	849	15074.8	849	12164.8	849	4230.6	849	5168.61	849	4562.01	849	4759.61
850	12953.8	850	11011.7	850	13652.6	850	10455.4	850	3481.85	850	4235.67	850	3285.55	850	3896.55
851	12372.3	851	11414.2	851	13804.4	851	10195.1	851	2923.59	851	3781.32	851	3452.52	851	3748.63
852	13616.3	852	11707.4	852	14657.6	852	8127.66	852	2707.73	852	3098.6	852	3644.71	852	4018.24
853	13885.3	853	11495.5	853	16503.3	853	9361.41	853	3138.24	853	3600.09	853	3241.49	853	2992.12
854	14133.4	854	11246.4	854	16412.1	854	10106.1	854	4167.88	854	4384.74	854	4035.34	854	2565.33
855	13646.5	855	11333	855	14581.8	855	10039.5	855	5904.4	855	6143.48	855	6377.14	855	4233.47
856	13488	856	11765.4	856	14064.7	856	10309.8	856	6625.99	856	7167.14	856	7687.38	856	6718.58
857	13561.1	857	11185	857	11418.7	857	8357.66	857	7322.1	857	6749.38	857	8034.89	857	8434.27
858	13215.4	858	10623.3	858	12139.9	858	10489.4	858	6397.62	858	6131.3	858	8076.76	858	8137.49
859	12531.5	859	11142.8	859	11561.8	859	9858.81	859	6463.89	859	6857.76	859	7031.78	859	6568.45
860	11237.2	860	10948.5	860	10581.7	860	8758.93	860	7329.1	860	8909.57	860	6923.84	860	6141.88
861	14185.6	861	13730.2	861	10470.4	861	8654.93	861	6745.5	861	8237.92	861	7226.29	861	7386.9
862	13406.1	862	12831.2	862	9471.75	862	8377.15	862	6176.33	862	7944.12	862	6867.31	862	7746.95
863	14680.9	863	13896.1	863	9332.34	863	9669.6	863	5763.61	863	7616.67	863	7282.32	863	8398.11
864	14130.1	864	12430.3	864	7725.55	864	6860.66	864	6470.76	864	6416.61	864	7142.27	864	8591.26
865	15419.9	865	12511	865	8658.18	865	7696.7	865	8196.2	865	7110.57	865	6629.82	865	8087.26
866	13092.1	866	10118.8	866	8094.07	866	5982.97	866	8886.98	866	7260.23	866	6624.33	866	7144.16
867	10075.9	867	8601.35	867	7495.63	867	6397.69	867	8642.76	867	7874.66	867	6429.78	867	5458.95
868	7704.15	868	6164.19	868	8258.47	868	7198.76	868	7942.47	868	7592.27	868	6346.95	868	5453.62
869	7143.4	869	5940.01	869	8853.93	869	8174.85	869	8970.58	869	8210.68	869	5678.85	869	4695.17
870	7991.46	870	5588.54	870	9247.94	870	7961.85	870	8924.94	870	7786.14	870	5049.56	870	3879.57
871	7924.17	871	5437.29	871	10645.2	871	9645.48	871	8051.78	871	9445.17	871	5029.16	871	4376.95
872	7632.31	872	5650.73	872	11092.2	872	11205.1	872	7292.54	872	7457.21	872	4853.7	872	5041.52
873	6407.96	873	4404.93	873	10993.8	873	13199.2	873	6547.55	873	7273.34	873	5927.49	873	6789.45
874	4958.89	874	3798.94	874	10778.1	874	12865.1	874	6183.33	874	9952.6	874	7703.26	874	9104.53
875	3587.08	875	3504.47	875	9772.11	875	10802.1	875	6796.1	875	11523.6	875	9473.8	875	11536
876	3560.51	876	3853.45	876	10909.8	876	11389.3	876	5553.31	876	9176.11	876	8936.09	876	10624.1
877	4076.82	877	4266.16	877	10097.4	877	9542.97	877	5383.81	877	8594.39	877	7292.62	877	7418.16
878	3379.58	878	3723.73	878	10101.4	878	9357.47	878	5709.13	878	7867.14	878	5572.83	878	5795.86
879	3442.47	879	4239.76	879	8872.99	879	9141.14	879	5038.11	879	7220.8	879	4940.77	879	4730.5
880	3552.4	880	3527.49	880	7469.07	880	7778.59	880	5983.65	880	7390.28	880	4891.5	880	3612.07
881	4776.34	881	5683.07	881	8306.91	881	6682.85	881	4708.15	881	5595.51	881	4564.23	881	3539.8
882	6700.79	882	7171.34	882	8409.63	882	7634.98	882	5737.6	882	5595.04	882	3888.58	882	2808.34
883	7030.37	883	7326.06	883	9562.63	883	6679.16	883	4625.37	883	4923.18	883	3339.35	883	2155.09
884	9522.23	884	8744.19	884	9330.75	884	8026.12	884	4002.96	884	3750.92	884	3552.3	884	2380.85
885	9974.35	885	9243.26	885	10319.3	885	9374.18	885	3917.36	885	3995.7	885	2741.06	885	1363.27
886	13444.6	886	12316.3	886	9581.98	886	8496.11	886	3416.95	886	4050.39	886	3147.93	886	2235.79
887	18266.1	887	17798.9	887	8891.38	887	9644.98	887	4184.36	887	6483.2	887	2933.66	887	1724.99
888	14739.7	888	11660.2	888	10807.3	888	10336	888	3554	888	6228.35	888	4079.72	888	5051.74
889	10780.6	889	7078.34	889	8860.17	889	8090.72	889	3466.82	889	5646.16	889	4328.98	889	4976.32
890	9356.58	890	5611.4	890	11376.9	890	11043.8	890	4691.05	890	7250.54	890	4343.15	890	4913.84
891	8162.26	891	5398.76	891	11895.8	891	12497.5	891	4558.37	891	6529.41	891	4463.8	891	4440.89
892	5992.95	892	4588.45	892	13273	892	12186.3	892	3923.7	892	5489.83	892	5009.77	892	5569.32
893	4754.74	893	4633.13	893	14236.6	893	14661.6	893	2969.37	893	5015.98	893	6193.85	893	6021.02
894	3607.31	894	3308.78	894	15484.5	894	17369.4	894	2742.73	894	4498.79	894	6140.58	894	6198.43
895	3564.94	895	3404.72	895	14586.6	895	14746.2	895	2371.48	895	3741.28	895	5271.08	895	4627.64
896	2739.77	896	2553.24	896	13807.6	896	14979.5	896	2277.37	896	4050.31	896	3950.53	896	3656.42
897	2545	897	1999.73	897	11913.8	897	12754.5	897	2268.47	897	3558.16	897	3229.66	897	4043.9
898	5427.62	898	3738.09	898	12128.3	898	11880.1	898	2527.91	898	4257.43	898	5781.24	898	6441.1
899	5541.31	899	5247.06	899	11013.1	899	11370.5	899	1641.24	899	3503.37	899	6530.5	899	7969.51
900	6314.57	900	6359.25	900	9813.38	900	11473.1	900	2312.2	900	4544.74	900	7300.16	900	8969.05
901	5815.77	901	6499.02	901	10211.5	901	9928.99	901	3145.96	901	5511.94	901	7040.46	901	7367.03
902	5609.14	902	6381.91	902	10462.4	902	11212.8	902	3365.03	902	4268.44	902	6594.15	902	6945.56
903	5910.11	903	7406.43	903	11547.7	903	12690.2	903	3369.33	903	4173.97	903	5737.97	903	6821.11
904	6161.66	904	6220.99	904	11014.5	904	11489.8	904	4510.72	904	3986.64	904	6261.78	904	6771.61
905	8193.13	905	8244.71	905	11771.9	905	11089.4	905	4659.48	905	4659.74	905	7670.07	905	7163.49
906	8306.38	906	9111.73	906	11799.2	906	11534.9	906	6001.66	906	6354.06	906	8877.89	906	8082.87
907	8882.48	907	9860.57	907	11639.6	907	9719.87	907	9048.4	907	8932.91	907	6146.38	907	7875.46
908	9340.63	908	9154.48	908	12538.5	908	9378.29	908	16544.1	908	14479.6	908	7030.84	908	8317.88
909	8062.56	909	6975.41	909	13910.9	909	10461.6	909	16172.6	909	14204.7	909	3907.03	909	6599.24
910	6462.09	910	6699.47	910	14528.1	910	12218.1	910	16038.6	910	9361.85	910	4960.42	910	7249.17
911	8731.93	911	7019.96	911	14330	911	12179.6	911	11885.9	911	7005.31	911	3577.67	911	4757.49
912	7405.33	912	5227.97	912	14277.3	912	10878	912	7270.95	912	3579.21	912	2670.6	912	3145.64
913	7254.04	913	5482.3	913	13958	913	10419.1	913	5232.29	913	3759.77	913	3330.34	913	4084.73
914	9001.45	914	7648.18	914	13374.1	914	9016.09	914	3619.76	914	2808.7	914	3966.64	914	5003.58
915	11359.9	915	9721.79	915	12913	915	8801.7	915	2655.84	915	1707.81	915	3434.5	915	4276.27
916	9569.55	916	9142.07	916	12910.8	916	9165.39	916	2138.23	916	2452.84	916	3610.6	916	4513.31
917	7123.01	917	7856.3	917	13443.1	917	8458.56	917	3429.34	917	4535.47	917	4137.68	917	4178.23
918	5706.41	918	6337.77	918	14131	918	9375.94	918	4268.55	918	5787.64	918	4429.38	918	4205.47
919	5917.17	919	5122.6	919	15047.1	919	11288.1	919	5216.84	919	6000.15	919	5113.53	919	4907.55
920	4957.12	920	4186.79	920	16339.1	920	13777.5	920	4727.22	920	5345.5	920	6204.96	920	5932.27
921	3542	921	2482.75	921	18297.5	921	15703.4	921	5008.47	921	5321.05	921	6465.76	921	6420.52
922	3380.83	922	1633.08	922	18622.1	922	17728.6	922	5610.76	922	6349.54	922	5992.68	922	7031.22
923	3022.89	923	2279.24	923	18044.9	923	17998	923	4729.95	923	5236.4	923	6896.52	923	8705.32
924	2923.12	924	2346.35	924	16401.5	924	19026.6	924	9371.04	924	11891.2	924	7993.02	924	9955.51
925	2404.62	925	2502.76	925	14876.8	925	18783.3	925	12932.7	925	15338.2	925	7800.39	925	8925.76
926	2682.77	926	2780.97	926	14044.3	926	16091.2	926	14500.6	926	14611.9	926	9491.97	926	10856.7
927	3284.33	927	3564.38	927	14500.5	927	14160.1	927	12281.9	927	12968.2	927	8632.64	927	9843.97
928	5501.33	928	5102.24	928	14523.8	928	13649.3	928	11370.2	928	13096.4	928	9310.18	928	11068
929	5087.41	929	4616.79	929	16891.4	929	15033.9	929	11671	929	14177.5	929	8300.83	929	9322.99
930	5642.31	930	5282.93	930	16594.5	930	13968.4	930	11079	930	14893.5	930	7574.64	930	8220.54
931	4955.69	931	4031.61	931	16268.1	931	13454.6	931	10548.3	931	13399.5	931	6604	931	6528.37
932	4388.19	932	4464.13	932	13924.4	932	11510.5	932	9032.66	932	11428	932	6288.71	932	6697.47
933	5590.55	933	5923.53	933	13143.2	933	11626	933	8875.26	933	9986.73	933	6974.94	933	6741.66
934	6478.67	934	6667.9	934	15326.6	934	13671.6	934	7408.63	934	8902.77	934	7798.02	934	7744.47
935	7908.02	935	7167.31	935	14523.9	935	11734.3	935	8031.91	935	9234.99	935	8379.31	935	8069.22
936	10021.3	936	9583.15	936	15664.2	936	11512.2	936	7810.49	936	8852.22	936	8905.78	936	9045.57
937	10150	937	9328.55	937	14946.1	937	9777.66	937	8584.07	937	11423.1	937	9748.19	937	9707.34
938	12101.5	938	10338.7	938	14362	938	9687.56	938	7994.04	938	11904.4	938	9332.4	938	9732.62
939	13958.1	939	11112	939	13002.1	939	9081.12	939	7503.51	939	11220	939	9992.53	939	10131.1
940	11500	940	10488.9	940	12710.9	940	8434.37	940	6482.05	940	6947.12	940	10363.6	940	10020.9
941	14011.3	941	13123.8	941	13829.9	941	10930	941	5742.99	941	7020.14	941	9276.31	941	7919.53
942	16246.3	942	15542.4	942	13911.4	942	10812.2	942	6680.27	942	7826.79	942	8303.62	942	7338.36
943	17283.2	943	17238.2	943	13199.4	943	11898.9	943	8532.73	943	9114.49	943	8304.58	943	7268.83
944	17014.4	944	15542.5	944	13002.8	944	10503.2	944	10082.2	944	10929.1	944	9389.84	944	8361.56
945	17058.3	945	14914.4	945	12657.3	945	9584.24	945	19066.6	945	18313.7	945	8918.81	945	7776.75
946	16901.5	946	15455	946	13831	946	10417.5	946	16518.5	946	17717.7	946	8640.69	946	7082.39
947	16241.9	947	15714.9	947	14195.4	947	11692.5	947	18083.9	947	20797.4	947	9868.61	947	8899.19
948	14435.5	948	14568	948	13554.7	948	12527.7	948	17366.2	948	20501.2	948	9833.05	948	10397.9
949	11712.9	949	11923.5	949	13621.4	949	12420.6	949	14163.2	949	18463	949	8688.41	949	10312.8
950	9484.28	950	9792.26	950	13366.8	950	13076.8	950	9972.66	950	13542.8	950	7919.43	950	9314.86
951	10416.6	951	10390.3	951	14171.3	951	14112.1	951	7096.4	951	11444.4	951	9067.04	951	9246.03
952	9926.82	952	7955.73	952	13987.1	952	14972.6	952	5934.59	952	10821.3	952	10739.1	952	10245.6
953	11786.4	953	8780.27	953	16183.6	953	14661.7	953	4929.63	953	8204.62	953	9921.27	953	10164.5
954	10662.3	954	6839.12	954	16681.7	954	14587.4	954	6428.04	954	7618.12	954	10714.8	954	11749
955	11043.7	955	7094.74	955	16084.5	955	16533	955	7090.15	955	7226.43	955	10049.5	955	11188.9
956	12624.4	956	9212.9	956	16071.6	956	18600.8	956	7438.71	956	7788.89	956	10608.2	956	12232.7
957	14230.3	957	10505.6	957	21001.8	957	19381.1	957	7601.75	957	9924.61	957	9832.84	957	10767.2
958	17609.7	958	12739.8	958	19815.4	958	18548.3	958	7534.35	958	9584.52	958	9461.57	958	10617.2
959	14231.9	959	10990.6	959	17415.1	959	17312.5	959	6680.31	959	8770.6	959	9137.32	959	10186.3
960	13458.1	960	10583.1	960	18703.2	960	19094.9	960	5622.45	960	5193.65	960	7303.9	960	10038.5
961	13986.6	961	11894.6	961	18597.6	961	19392.1	961	6595.3	961	5050.43	961	8387.86	961	10967.3
962	13197.2	962	9693.89	962	19797.6	962	17992.7	962	7995.68	962	6795.48	962	9038.05	962	11242.3
963	10030.8	963	7236.15	963	18538.2	963	16599.5	963	8220.14	963	7827.72	963	8281.77	963	9236.56
964	10369.7	964	7519.72	964	17533.2	964	17642.6	964	8800.22	964	7275.27	964	8047.3	964	9006.73
965	9024.54	965	6635.17	965	16765.8	965	17619.6	965	9423.89	965	8382.88	965	8438.38	965	8881.22
966	9425.55	966	8239.12	966	16139.7	966	17076.3	966	9408.16	966	6605.3	966	8749.04	966	9206.79
967	13546.5	967	11575.1	967	14518.4	967	14517.1	967	10541.5	967	8148.66	967	8360.59	967	10237.3
968	16098.4	968	15369	968	15057.1	968	14096.6	968	11194.7	968	10778.7	968	8159.39	968	9977.81
969	13192.2	969	11867.3	969	14659.4	969	14002.2	969	13387.9	969	13029	969	8211.8	969	9144.9
970	13717.4	970	12266.1	970	13608	970	15231	970	13289.2	970	12163.9	970	9788.28	970	10330.9
971	14149.2	971	11481.8	971	13185.1	971	16976.6	971	15088.8	971	11890	971	10141.7	971	9857.92
972	13558.4	972	9767.55	972	14136.2	972	19044.7	972	16102.1	972	13457.5	972	9824.96	972	8073.25
973	13816	973	10639.6	973	13701.6	973	19182.1	973	14827.1	973	13318.8	973	9111.85	973	6218.49
974	13154.1	974	9408.3	974	17689	974	20664.9	974	14675.4	974	13069.2	974	7476.61	974	4438.94
975	13470.8	975	10021.9	975	19333.7	975	20523.7	975	12753.5	975	13491	975	5623.33	975	3865.86
976	13438.6	976	10903.5	976	19288.7	976	16005.4	976	13050.6	976	13030.7	976	10288.2	976	7881.83
977	14827.7	977	13634.4	977	20446.6	977	16049	977	13001	977	12281.3	977	8284.44	977	5270.33
978	14960.7	978	12557.9	978	19606.5	978	17479.5	978	11453	978	10797.8	978	7672.06	978	5712.26
979	15176.1	979	13448.9	979	19532.2	979	16216.1	979	9364.04	979	9569.85	979	7108.09	979	6111.98
980	14205	980	12542.8	980	17114.8	980	14553.8	980	8250.68	980	8349.39	980	7184.77	980	6243.96
981	14503.5	981	11923.4	981	17693.9	981	14311.6	981	8572.2	981	7562.02	981	10463.6	981	10127.6
982	14661.8	982	11402.9	982	15484.5	982	11007.1	982	9738.53	982	9170.25	982	11011.2	982	12032.3
983	15614	983	11686.9	983	13593.7	983	9845.08	983	10667.1	983	11204.4	983	9830.15	983	10646.2
984	16166.9	984	12206.5	984	13504.3	984	8676.78	984	9326.61	984	11541	984	8137.03	984	8200.65
985	17268	985	11852.1	985	12543.4	985	8423.48	985	9914.15	985	11485.7	985	7352.34	985	7652.33
986	16290.9	986	9955.6	986	11903.8	986	8722.13	986	12502.6	986	13360	986	6815.5	986	6098.69
987	11827.8	987	7271.18	987	11458.8	987	8011.55	987	12304.2	987	10420.4	987	6690.17	987	5895.05
988	13048.7	988	7767.12	988	13098.5	988	9079.09	988	7536.26	988	6779.95	988	6064.78	988	4887.85
989	10820.3	989	7089.54	989	12954.6	989	8190.32	989	5501.17	989	5443.32	989	6110.87	989	5339.93
990	11992.1	990	8717.21	990	13677.4	990	9139.33	990	3942.05	990	2868.94	990	6016.98	990	5835.42
991	10101.2	991	7829.15	991	13188.8	991	9814.6	991	4271.85	991	3063.22	991	6561.07	991	7160.78
992	11180.1	992	8477.12	992	12460.3	992	9280.12	992	4304.08	992	2933.3	992	6657.46	992	7644.79
993	10114.4	993	8257.72	993	11491	993	9987.61	993	4137.69	993	2952.27	993	6153.95	993	7691.29
994	9959.32	994	7484.36	994	15826.2	994	13088.3	994	4521.67	994	3218.66	994	5365.8	994	7051.27
995	9700.69	995	7060.45	995	15964.9	995	13222.1	995	5171.13	995	4498.5	995	6553.34	995	7945.36
996	9758.12	996	7419.71	996	14877.4	996	11994.3	996	3743.68	996	3783.25	996	8514.45	996	8421.58
997	8963.66	997	8221.26	997	14050	997	13115.7	997	4706.05	997	6452.88	997	7241.34	997	6664.54
998	8795.84	998	8586.64	998	13822.9	998	11669.1	998	4189.4	998	4968.13	998	10487.3	998	8728.01
999	8487.28	999	6517.73	999	13695.5	999	12117.5	999	6549.94	999	7155.86	999	11792	999	8841.44
1000	7730.01	1000	5880.04	1000	13358	1000	13169.7	1000	7923.77	1000	7322.31	1000	13532.3	1000	10419.5
1001	7435.44	1001	6162.99	1001	13377.3	1001	12957.9	1001	8884.09	1001	7230.19	1001	15417.4	1001	13491.3
1002	6169.1	1002	5675.71	1002	12856	1002	12242.4	1002	9082.12	1002	7422.17	1002	15854.5	1002	17648.1
1003	6574.95	1003	6035.75	1003	12413.5	1003	9060.32	1003	9743.47	1003	7256.46	1003	13582.3	1003	15694.7
1004	5440.81	1004	5389.21	1004	14553.8	1004	9893.81	1004	9845.48	1004	6844.58	1004	14277.8	1004	16538.9
1005	7883.29	1005	7460.62	1005	13404	1005	8768.37	1005	11438.9	1005	8829.08	1005	11780.7	1005	14731.8
1006	9266.68	1006	8467.59	1006	12633.9	1006	7941.6	1006	9818.91	1006	8661.65	1006	10938.6	1006	13965.5
1007	7575.62	1007	6925.5	1007	13254	1007	8410.4	1007	9293.82	1007	9619.17	1007	10161.1	1007	12674.3
1008	6596.87	1008	6161.35	1008	12396.6	1008	8071.76	1008	10815.9	1008	10724	1008	9152.12	1008	10341.5
1009	8142.17	1009	6517.59	1009	12166.1	1009	7618.79	1009	13457.7	1009	15852.6	1009	8423.01	1009	10027.2
1010	8577.55	1010	7316.26	1010	13185.1	1010	9104.72	1010	14493	1010	16120.9	1010	7108.58	1010	9076.69
1011	7639.68	1011	6704.76	1011	13336.4	1011	8287.57	1011	17194.1	1011	18283.4	1011	6028.23	1011	7945.56
1012	10023.9	1012	7991.18	1012	16004.9	1012	10302.9	1012	20373.7	1012	20622.4	1012	5752.15	1012	8196.4
1013	8685.19	1013	7392.92	1013	16728.1	1013	12089	1013	17624	1013	19147.7	1013	5164.76	1013	7844.07
1014	7505.42	1014	6767.89	1014	18324.7	1014	15074.5	1014	15584	1014	17234.3	1014	5613.31	1014	7287.9
1015	8484.09	1015	6934.7	1015	19422	1015	20382.6	1015	15723.9	1015	17294.4	1015	6298.06	1015	8205.74
1016	8743.06	1016	7044.74	1016	19665	1016	19835	1016	13936.3	1016	15749.6	1016	6995.4	1016	9503.33
1017	8584.15	1017	7494.95	1017	20279.9	1017	20934.7	1017	13499.9	1017	14706.9	1017	7323.72	1017	9465.61
1018	7804.53	1018	6159.67	1018	17611.7	1018	19172.1	1018	14683.7	1018	13828	1018	6781.05	1018	9341.54
1019	8723.57	1019	6199.29	1019	18640.2	1019	19987.5	1019	14175	1019	12180.4	1019	6372.07	1019	8786.19
1020	7917.37	1020	5813.98	1020	22125.8	1020	21983.2	1020	16078.1	1020	14701.5	1020	6335.35	1020	8490.84
1021	7364.44	1021	5587.93	1021	20415.3	1021	20802.6	1021	14964.3	1021	14308.8	1021	6006.64	1021	8940.23
1022	6457.13	1022	4792.5	1022	22603.1	1022	22166	1022	15939.7	1022	18200.9	1022	7039.46	1022	10228.9
1023	5643.98	1023	4254.95	1023	24162.2	1023	23939.3	1023	16331.6	1023	16138.9	1023	8101.08	1023	10179.9
1024	7639.83	1024	6701.85	1024	25593.4	1024	25640.1	1024	19138.5	1024	17660.7	1024	8226.1	1024	9809.43
1025	9871.71	1025	8550.12	1025	24769.7	1025	25951.5	1025	22277.1	1025	19258.7	1025	7870.99	1025	8834.06
1026	10685	1026	8695.6	1026	22186.6	1026	20496.2	1026	21655.6	1026	18643.1	1026	7274.57	1026	7365.47
1027	10706.7	1027	8878.78	1027	24278.4	1027	25273.7	1027	20779.4	1027	18710	1027	7909.4	1027	8079.27
1028	10709	1028	8645.31	1028	25672.8	1028	25798.3	1028	23333.2	1028	22190.1	1028	8929.44	1028	8643.56
1029	10079	1029	7955.25	1029	24602.3	1029	24586.3	1029	19895.4	1029	18898.2	1029	10050.3	1029	8864.06
1030	9465.66	1030	7384.7	1030	23741.9	1030	22810.8	1030	20784	1030	18823	1030	10470.5	1030	9950.9
1031	9908.4	1031	8798.61	1031	25303.6	1031	24439.3	1031	18504.5	1031	16556.2	1031	11242.3	1031	9464.63
1032	9386.35	1032	8113.43	1032	24156.9	1032	21584.3	1032	15990	1032	12121.3	1032	12223.7	1032	10306.4
1033	9835.97	1033	9388.49	1033	22120.2	1033	17581.3	1033	16737.1	1033	13165.6	1033	13390.6	1033	11504.1
1034	9111.69	1034	9376.18	1034	22901.3	1034	20659.2	1034	14456.8	1034	12118.7	1034	12546.9	1034	11638
1035	8439.93	1035	8505.09	1035	18886.4	1035	16217.5	1035	15952.8	1035	13577.7	1035	10679.5	1035	12722.2
1036	7057.76	1036	6262.83	1036	18434.9	1036	15747.2	1036	14578.5	1036	12468.9	1036	11582.4	1036	12562.1
1037	7354.87	1037	5565.87	1037	14482	1037	10388	1037	12065.7	1037	11750.7	1037	11462.7	1037	12108.9
1038	6353.22	1038	3908.05	1038	13672.3	1038	9337.71	1038	13990.4	1038	13384	1038	11652.9	1038	10894.6
1039	5432.14	1039	3260.25	1039	11910.7	1039	9316.24	1039	15325.1	1039	12169.5	1039	10730.3	1039	12043.9
1040	5814.72	1040	3261.67	1040	13028.1	1040	10119.6	1040	15681.2	1040	11569	1040	11687.3	1040	12539.3
1041	6106.72	1041	2698.82	1041	13839.6	1041	8074.77	1041	19992.5	1041	16148	1041	11548.2	1041	13802.2
1042	5671.82	1042	2633.64	1042	15042.7	1042	11434.1	1042	19648.3	1042	17795.7	1042	10035.4	1042	11447.5
1043	5209.72	1043	1873.07	1043	15212.5	1043	9285.53	1043	15034.2	1043	16360.2	1043	9791.45	1043	10278.8
1044	4026.77	1044	1402.75	1044	13756.3	1044	7568.28	1044	11943.1	1044	13353.6	1044	9780.29	1044	9414.13
1045	3508.19	1045	1753.51	1045	15943.1	1045	10463.7	1045	7702.08	1045	9313.52	1045	9968.01	1045	9284.64
1046	4214.02	1046	2675.28	1046	16075.1	1046	10676.9	1046	5684.82	1046	6538.9	1046	8113.73	1046	7626.5
1047	5574	1047	4508.18	1047	16318.9	1047	10817.2	1047	2851.14	1047	2901.47	1047	6866.53	1047	7135.01
1048	6147.98	1048	4222.09	1048	14763.3	1048	10391.2	1048	4577.51	1048	2536.98	1048	5925.74	1048	6653.45
1049	5019.83	1049	2251.49	1049	14266.3	1049	8531.57	1049	2312.57	1049	1290.09	1049	5684.55	1049	6572.85
1050	4659.18	1050	2502.87	1050	6929.17	1050	4571.68	1050	6000.71	1050	3361.57	1050	5921.15	1050	6847.5
1051	4120.33	1051	2743.72	1051	4116.6	1051	4037.78	1051	2596.66	1051	2036.88	1051	6285.7	1051	7589.06
1052	2967.57	1052	2324.75	1052	4259.81	1052	3527.04	1052	1615.42	1052	2146.95	1052	6317.37	1052	7310.67
1053	3461.61	1053	3236.95	1053	5586.75	1053	3946.95	1053	1652.33	1053	1559.41	1053	6305.56	1053	7403.06
1054	6046.58	1054	5936.8	1054	5816.06	1054	4619.91	1054	3118.5	1054	3188.1	1054	5629.4	1054	9311.25
1055	5522.95	1055	6775.76	1055	6496.56	1055	5691.89	1055	4886.06	1055	4667.56	1055	5650.72	1055	9335.69
1056	6610.24	1056	8536.88	1056	7342	1056	6487.83	1056	6315.32	1056	6026.95	1056	5400.74	1056	10245.9
1057	7290.06	1057	8867.58	1057	8691.06	1057	5993.19	1057	10778.8	1057	10806.6	1057	6120.34	1057	7867.35
1058	7554.19	1058	8416.77	1058	8124.69	1058	5115.15	1058	8822.31	1058	9119.99	1058	6553.6	1058	7750.92
1059	7412.74	1059	7914.7	1059	7860.36	1059	5463.9	1059	11252.5	1059	11499.7	1059	7560.39	1059	7639.93
1060	6764.07	1060	7321.91	1060	7346.79	1060	5192.35	1060	10473.1	1060	11831.6	1060	8212.62	1060	8625.42
1061	6902.17	1061	8894.37	1061	9134.48	1061	8389.48	1061	9368.6	1061	10620.2	1061	6059.4	1061	7304.8
1062	7643.44	1062	11348.7	1062	9314	1062	8689.9	1062	10236.9	1062	12327.3	1062	7316.24	1062	7762.62
1063	8409	1063	8824.19	1063	10724.3	1063	8209.39	1063	9460.61	1063	11080.8	1063	4640.51	1063	6282.06
1064	8798.55	1064	10819.4	1064	11043.8	1064	8078.69	1064	8160.9	1064	10574.1	1064	2750.54	1064	5096.52
1065	8609.18	1065	7822.86	1065	9507.11	1065	8557.97	1065	12532.8	1065	12249	1065	2284.67	1065	4494.39
1066	9108.67	1066	8978.24	1066	10732.9	1066	7987.96	1066	10560.1	1066	12167.8	1066	3606.35	1066	5894.37
1067	9446.67	1067	9106.71	1067	7806.85	1067	8212.01	1067	12247.6	1067	12746.1	1067	3855.64	1067	6049.85
1068	9838.54	1068	10574.1	1068	7263.08	1068	6979.52	1068	13966.9	1068	13408.5	1068	4480.76	1068	6427.7
1069	7447.47	1069	9255.66	1069	7186.57	1069	8014.86	1069	13182.2	1069	12710.2	1069	4823	1069	6718.76
1070	6974.9	1070	9922.89	1070	6492.1	1070	8644.26	1070	14191	1070	12183.5	1070	6498.06	1070	9565.87
1071	7768.69	1071	11169	1071	7394.84	1071	8794.01	1071	14086.1	1071	12391.3	1071	5667.64	1071	8872.11
1072	8196.43	1072	10579.9	1072	8380.52	1072	8244.8	1072	13445	1072	10925.2	1072	5909.99	1072	6773.1
1073	10105.3	1073	10951.8	1073	9759.56	1073	6245.99	1073	12278.2	1073	8890.53	1073	5617.06	1073	5579.73
1074	10595.7	1074	11058.3	1074	11458.8	1074	7634.16	1074	12378	1074	11058.8	1074	6385.39	1074	5057.97
1075	9514.56	1075	10920.5	1075	10204.5	1075	9200.84	1075	14323.7	1075	14994.8	1075	6570.06	1075	5406.23
1076	8231.29	1076	8546.3	1076	7338.48	1076	7211.12	1076	12989	1076	12612.4	1076	6455.81	1076	5261.74
1077	6375.66	1077	6372.41	1077	8767.32	1077	8738.53	1077	12650.3	1077	10299.1	1077	7061.27	1077	4662.22
1078	8098.69	1078	7329.65	1078	10539.4	1078	8636.26	1078	12723	1078	10966.9	1078	8068.83	1078	5286.66
1079	8517.35	1079	7279.65	1079	11327.7	1079	7350.57	1079	11926.8	1079	9946.14	1079	10237.3	1079	8761.91
1080	7126.96	1080	5752.06	1080	11906.5	1080	9832.12	1080	10787	1080	10226.6	1080	9596.46	1080	10406.6
1081	5565.94	1081	4409.05	1081	11080.1	1081	9453.98	1081	9577.71	1081	9500.87	1081	8464.09	1081	10515
1082	5035.3	1082	3252.32	1082	10758.3	1082	8984.33	1082	10889.4	1082	9744.89	1082	8051.83	1082	11166.6
1083	4293.41	1083	3854.67	1083	9155.41	1083	8429.07	1083	9259.5	1083	9707.21	1083	5718.61	1083	7301.25
1084	4130.24	1084	4898.99	1084	7653.82	1084	10014.2	1084	9197.69	1084	10418.7	1084	5946.26	1084	7046.71
1085	4134.9	1085	4264.1	1085	7388.24	1085	10526.7	1085	8415.97	1085	10714.5	1085	6179.96	1085	6643.08
1086	5389.23	1086	5012.12	1086	9781.6	1086	11071.3	1086	9066.47	1086	11946.7	1086	6201.18	1086	6535.98
1087	6025.63	1087	4182.54	1087	10237.5	1087	10958.9	1087	9328.18	1087	12732.7	1087	6550.97	1087	7366.66
1088	5479.86	1088	3436.57	1088	9469.73	1088	9491.64	1088	8963.11	1088	13519.9	1088	6955.61	1088	8076.41
1089	4602.22	1089	3894.56	1089	9310.22	1089	10008.4	1089	8145.18	1089	12211.7	1089	6126.99	1089	8783.82
1090	3268.09	1090	3413.68	1090	9625.47	1090	11637.1	1090	8206.61	1090	11995.5	1090	4981.71	1090	7654.36
1091	4260.43	1091	4524.17	1091	9555.2	1091	12000.5	1091	9013.27	1091	12336	1091	4604.52	1091	6803.69
1092	3353.78	1092	3546.31	1092	9063.35	1092	11529.6	1092	10890.4	1092	14594.1	1092	4285.09	1092	6380.9
1093	4107.8	1093	5011.42	1093	9007.08	1093	9756.18	1093	11547.4	1093	14272.6	1093	4957.96	1093	5599.04
1094	3194.54	1094	3976.45	1094	8354.26	1094	8485.37	1094	7835.17	1094	11121.9	1094	5630.47	1094	4683.34
1095	3231.08	1095	4135.4	1095	8320.91	1095	10548.9	1095	5559.39	1095	8345	1095	7660.97	1095	8147.74
1096	4902.63	1096	4405.9	1096	9923.59	1096	10391	1096	4532.4	1096	7435.33	1096	9389.01	1096	10739.7
1097	3799.44	1097	2740.42	1097	9926.38	1097	9481.46	1097	4819.6	1097	8246.63	1097	8226.13	1097	10181.7
1098	3566.03	1098	2816.77	1098	10049.5	1098	8090.19	1098	5312.53	1098	9146.24	1098	8162.58	1098	9319.35
1099	1356.81	1099	1254.53	1099	11103.5	1099	8638.07	1099	5624.76	1099	7787.15	1099	7725.83	1099	8366.56
1100	1622.18	1100	1525.03	1100	10020.4	1100	5698.23	1100	2363.13	1100	4875.88	1100	6288.07	1100	5570.31
1101	1914.99	1101	2126.67	1101	11358.8	1101	8959.93	1101	1458.83	1101	4514.43	1101	6766.33	1101	7184.51
1102	2804.52	1102	2323.36	1102	9787.03	1102	8213.48	1102	844.144	1102	2586.41	1102	6678.73	1102	7046.52
1103	2540.78	1103	2248.43	1103	9923.84	1103	8893.78	1103	1274.16	1103	3525.86	1103	7806.51	1103	8237.14
1104	3022.74	1104	2331.05	1104	11477.2	1104	8866.05	1104	1186.27	1104	2038.82	1104	9049.11	1104	10048.3
1105	2173.93	1105	1610.12	1105	9628.48	1105	8107.2	1105	1160.46	1105	2935.77	1105	8137.26	1105	9979.26
1106	2941.09	1106	2691.72	1106	9129.59	1106	6696.54	1106	2251.7	1106	3931.61	1106	8200.3	1106	10580.7
1107	4609.21	1107	4056.14	1107	5406.15	1107	6647.3	1107	3071.76	1107	5001.55	1107	7860.37	1107	9507.03
1108	4176.3	1108	3526.46	1108	6353.57	1108	7047.39	1108	2088.13	1108	3024.11	1108	8147.98	1108	10576.5
1109	4298.82	1109	3929.12	1109	6726.85	1109	8268.08	1109	532.06	1109	1140.6	1109	8156.5	1109	10309.2
1110	4128.74	1110	3012.52	1110	8251.84	1110	12098.9	1110	100.518	1110	542.181	1110	7520.64	1110	10202.3
1111	7036.04	1111	5812.25	1111	9942.02	1111	9883.44	1111	184.727	1111	172.418	1111	9330.06	1111	8449.69
1112	6737.29	1112	5599.35	1112	10058.2	1112	9447.07	1112	476.083	1112	678.028	1112	9108.77	1112	8451.94
1113	6910.67	1113	5860.87	1113	10823.7	1113	9142.14	1113	1513.06	1113	953.276	1113	9624.67	1113	9049.06
1114	6617.44	1114	5905.62	1114	11018.5	1114	8873.48	1114	2831.68	1114	1922.61	1114	9942.3	1114	9234.7
1115	5340.3	1115	4706.04	1115	12352.8	1115	9852.26	1115	2249.04	1115	2254.22	1115	10170.5	1115	8369
1116	6278.92	1116	6372.47	1116	13649.6	1116	12000.4	1116	2604.56	1116	3597.72	1116	7561.06	1116	5748.51
1117	5718.88	1117	6617.68	1117	13168.1	1117	14389.8	1117	2545.04	1117	3399.08	1117	5872.62	1117	5346.27
1118	5482.25	1118	5915.73	1118	12758.5	1118	15672.6	1118	2878.13	1118	4987.39	1118	6068.39	1118	5769.84
1119	7258.17	1119	7787.58	1119	12036.2	1119	13842.9	1119	3289.81	1119	4818.81	1119	5761.25	1119	3488.72
1120	6623.57	1120	6844.12	1120	11346.3	1120	11190	1120	3902.55	1120	5076.6	1120	5098.91	1120	1768.61
1121	5791.3	1121	5967.24	1121	9805.05	1121	9317.69	1121	3996.49	1121	5351.24	1121	4249.14	1121	1954.2
1122	4853.9	1122	4359.46	1122	8440.81	1122	8364.47	1122	4171.73	1122	4634.2	1122	3377.94	1122	1929.38
1123	4662.86	1123	3501.2	1123	8013.78	1123	7932.26	1123	4262.66	1123	4560.22	1123	3939.92	1123	2399.91
1124	3689.55	1124	2704.11	1124	6036.35	1124	5576.9	1124	4295.3	1124	6301.28	1124	4932.26	1124	3999.76
1125	4682.68	1125	4796.82	1125	5631.63	1125	4503.68	1125	4853.6	1125	7563.25	1125	6310.06	1125	4565.27
1126	3934.94	1126	4601.87	1126	6535.24	1126	6304.05	1126	5593.58	1126	6389.36	1126	7234.77	1126	6781.38
1127	5744.25	1127	8467.83	1127	7067.96	1127	6032.22	1127	5129.64	1127	4328.54	1127	8075.4	1127	7532.64
1128	7810.68	1128	9666.25	1128	9438.4	1128	9617.05	1128	6404.01	1128	6698.09	1128	9171.46	1128	9148.63
1129	9110.78	1129	11468.2	1129	8061.41	1129	9315.21	1129	7155.82	1129	7731.41	1129	8112.56	1129	9020.28
1130	9719.21	1130	11771	1130	8767.44	1130	9677.43	1130	10575	1130	11239.6	1130	9575.58	1130	10935.4
1131	8377.22	1131	9063.93	1131	8716.85	1131	8823.89	1131	13146.3	1131	15535.7	1131	8848.51	1131	9007.23
1132	7617.2	1132	6524.19	1132	8315.07	1132	8939.17	1132	13355.3	1132	14874.2	1132	8291.8	1132	9918.1
1133	6804.19	1133	5551.08	1133	8648.33	1133	10958.5	1133	14015.9	1133	15452.3	1133	8727.37	1133	10975.1
1134	5208.33	1134	3417.97	1134	8187.26	1134	10358.3	1134	14753.6	1134	14814.9	1134	9147.1	1134	9321.37
1135	6585.43	1135	5335.29	1135	9736.71	1135	11495.9	1135	16715.9	1135	15387.1	1135	8588.82	1135	7919.48
1136	7183.55	1136	6857.32	1136	8999.92	1136	10245.2	1136	15118.6	1136	14516.6	1136	7923.07	1136	6726.17
1137	6927.69	1137	7296.92	1137	9729.11	1137	11238.9	1137	19255	1137	17707.1	1137	7471.57	1137	6633.71
1138	6142.4	1138	7326.69	1138	11227.9	1138	11888.5	1138	26277.8	1138	23533.5	1138	7871.02	1138	6867.65
1139	5162.22	1139	6126.24	1139	14904.1	1139	11765.6	1139	28506.2	1139	27144.8	1139	9203.23	1139	8334.62
1140	4376.76	1140	5135.67	1140	13831	1140	13419.9	1140	27709.7	1140	27045.4	1140	8755.18	1140	7343.51
1141	4371.25	1141	6386.29	1141	16108.3	1141	14561.1	1141	28950.6	1141	27872.1	1141	6742.5	1141	5309.65
1142	4578.94	1142	6694.32	1142	17741.5	1142	15045.7	1142	26597.9	1142	25309	1142	6959.06	1142	6057.03
1143	4920.66	1143	7126.07	1143	17482.2	1143	13639.9	1143	22986.3	1143	23182.9	1143	7741.01	1143	6224.17
1144	4834.22	1144	7192.27	1144	15792.4	1144	11152.8	1144	22167.9	1144	22522.9	1144	5676.88	1144	4335.38
1145	5291.41	1145	7164.2	1145	14828.2	1145	12850.5	1145	18377.6	1145	20162.4	1145	5244.29	1145	5046.15
1146	6150.26	1146	6491.93	1146	13001.8	1146	13129.1	1146	15523.2	1146	15079	1146	5349.56	1146	6480.35
1147	8431.91	1147	8266.46	1147	13025.7	1147	11541.5	1147	17033.4	1147	15606.5	1147	6333.27	1147	6673.03
1148	7593.52	1148	10829.7	1148	13645.9	1148	12930	1148	16818.7	1148	16223.9	1148	7157.6	1148	7871.57
1149	8401.17	1149	10608.2	1149	15423.3	1149	13851.6	1149	16336.3	1149	15303.9	1149	7524.91	1149	7322.21
1150	6855.39	1150	8579.68	1150	13208	1150	12227.2	1150	16199.6	1150	14839.2	1150	8960.79	1150	8210.22
1151	8418.23	1151	9350.26	1151	13531.4	1151	12286	1151	14599.8	1151	15504.4	1151	9844.15	1151	8678.48
1152	7045.62	1152	7405.38	1152	12377.7	1152	9520.96	1152	14649.6	1152	12328	1152	9603.52	1152	8519.84
1153	7826.58	1153	7492.83	1153	13154.4	1153	9790.45	1153	14828.2	1153	14206	1153	9293.88	1153	7917.02
1154	9078.41	1154	8848.97	1154	11612.9	1154	10001.1	1154	17588.6	1154	18495.3	1154	9363.51	1154	8376.72
1155	7765.5	1155	8668.33	1155	11017	1155	10708.8	1155	15180.2	1155	13823.5	1155	8469.43	1155	7391.37
1156	8010.04	1156	9035.7	1156	11851	1156	8407.4	1156	15642	1156	14401	1156	7687.31	1156	6915.74
1157	6905.01	1157	7085.36	1157	11702.2	1157	7317.16	1157	14342.8	1157	12618.6	1157	6986.6	1157	5589.2
1158	8032.59	1158	8392.46	1158	10451.9	1158	6837.92	1158	11369.3	1158	8773.93	1158	6239.97	1158	4938.36
1159	7371.98	1159	8469.12	1159	12105.5	1159	9396.14	1159	9715.26	1159	6634.01	1159	6614.39	1159	5575.31
1160	7533.97	1160	9405.57	1160	12397.5	1160	7613.9	1160	13894.9	1160	11138.8	1160	7094.72	1160	7106.31
1161	9039.8	1161	9382.3	1161	15594.4	1161	9669.02	1161	10873.8	1161	8407.96	1161	7083.21	1161	8186.34
1162	8632.19	1162	9775.62	1162	17366.7	1162	11342.3	1162	8666.65	1162	7731.94	1162	6419.96	1162	6416.92
1163	6904.99	1163	6579.73	1163	18841.6	1163	13078.6	1163	8235.71	1163	9024.05	1163	6931.47	1163	5987.62
1164	5158.79	1164	4755.63	1164	16659.5	1164	14351.2	1164	8942.49	1164	10185.6	1164	8295.05	1164	8131.02
1165	5092.49	1165	3837.14	1165	16415.7	1165	15166.1	1165	9798.23	1165	11684.3	1165	8832.97	1165	10774.8
1166	5365.86	1166	4814.27	1166	14272.9	1166	13985.4	1166	8848.19	1166	10218	1166	9446.19	1166	12390.6
1167	5349.54	1167	5349.41	1167	13792.5	1167	11532.8	1167	7635.46	1167	9189.61	1167	8515.78	1167	9610.73
1168	4402.2	1168	5540.24	1168	13396.1	1168	11695.5	1168	7629.98	1168	8301.42	1168	6372.2	1168	6310.72
1169	5752.38	1169	6507.42	1169	12200.9	1169	10550.2	1169	6064.9	1169	7502.45	1169	5980.5	1169	7786.45
1170	5004.68	1170	3592.43	1170	16942.4	1170	11962.5	1170	6252.81	1170	7801	1170	4914.01	1170	6015.12
1171	4375.27	1171	3436.33	1171	17027.2	1171	12186.7	1171	8450.95	1171	8958.96	1171	5861.68	1171	8374.2
1172	3261.94	1172	2719.82	1172	13639.3	1172	8528.68	1172	6558.39	1172	6791.21	1172	5241.9	1172	7887.82
1173	2919.21	1173	3194.78	1173	10768.8	1173	8318.62	1173	10976.1	1173	12792.1	1173	5142.01	1173	7536.67
1174	4007.28	1174	4106.14	1174	11384.3	1174	7260.02	1174	12651.9	1174	16272.3	1174	8713.51	1174	12451.4
1175	5960.03	1175	7025.8	1175	10017.3	1175	5596.97	1175	11082.2	1175	13101.3	1175	11124.8	1175	13591.4
1176	6359.22	1176	6843.5	1176	10207.8	1176	6196.64	1176	9776.8	1176	12566.7	1176	9194.7	1176	12379.6
1177	7912.76	1177	9830.76	1177	12975.5	1177	10807.7	1177	7605.99	1177	7794.34	1177	10100.2	1177	13146.6
1178	7936.13	1178	8562.85	1178	12107.6	1178	9496.54	1178	7086.66	1178	7761.46	1178	9642.39	1178	9810.11
1179	6006.76	1179	4815.63	1179	10611.7	1179	8056.97	1179	5357.87	1179	5488.07	1179	10391.5	1179	10698.8
1180	4661.86	1180	4005.75	1180	7893.65	1180	7420.23	1180	4554.88	1180	4266.92	1180	10574.7	1180	9804.72
1181	3880.96	1181	3954.68	1181	6885.62	1181	6264.1	1181	4152.22	1181	4025.1	1181	10145.4	1181	9396.52
1182	3687.87	1182	3598.07	1182	5740.82	1182	4530.5	1182	4390.07	1182	5086.62	1182	8894.29	1182	9098.47
1183	4089.45	1183	3290.46	1183	6372.84	1183	4379.95	1183	3047.07	1183	5155.98	1183	7440.19	1183	7224.93
1184	5196.45	1184	4048.56	1184	7780.29	1184	5719.18	1184	2747.42	1184	4468.89	1184	7101.44	1184	7651.64
1185	5952.83	1185	4855.71	1185	7275.72	1185	4690.22	1185	3289.43	1185	5064.06	1185	8008.4	1185	10663
1186	5659.55	1186	5032.16	1186	7574.92	1186	5906.03	1186	4164.11	1186	5973.19	1186	8311.48	1186	10681.6
1187	5066.54	1187	4893.1	1187	8249.71	1187	5786.76	1187	3646.91	1187	5745.71	1187	8272.91	1187	10717
1188	5332.24	1188	4743.79	1188	9074.44	1188	5996.59	1188	5300.74	1188	7173.57	1188	10859.2	1188	14003.4
1189	6240.19	1189	5140.91	1189	8036.03	1189	4719.85	1189	7258.08	1189	8479.1	1189	10091.8	1189	12706.5
1190	7474.15	1190	5939.75	1190	6969.85	1190	4254.56	1190	7576.75	1190	8298.71	1190	10376.7	1190	13378.6
1191	7926.35	1191	6458.44	1191	5972.34	1191	3505.45	1191	7251.52	1191	8618.4	1191	12908.8	1191	13535.9
1192	7705.88	1192	6819.89	1192	5791.95	1192	4900.53	1192	9560.53	1192	10737.3	1192	12468	1192	13754.5
1193	7626.57	1193	8204.19	1193	7484.05	1193	9432.67	1193	12755.7	1193	12611.2	1193	13024.7	1193	12660.3
1194	5914.08	1194	6213.63	1194	6216.05	1194	6002.57	1194	13907.1	1194	14107.1	1194	11643.4	1194	8820.28
1195	7488.06	1195	7925.12	1195	7275.02	1195	8672.55	1195	13556.5	1195	15302.3	1195	7722.26	1195	5535.37
1196	6611.21	1196	7387.86	1196	7027.3	1196	6841.41	1196	13117.7	1196	15885.7	1196	8578.19	1196	6335.35
1197	7053.22	1197	6423.38	1197	7065.11	1197	6499.93	1197	12539.2	1197	14432.6	1197	4811.64	1197	4855.08
1198	8367.92	1198	6667.73	1198	7871.19	1198	9102.63	1198	12452.6	1198	14679.2	1198	5178.09	1198	8820.79
1199	7182.3	1199	5802.27	1199	7855.36	1199	7390.56	1199	13476.6	1199	16363.5	1199	5258.21	1199	6638.86
1200	6455.5	1200	4991.58	1200	9566.46	1200	7160.57	1200	13259.6	1200	16771.3	1200	6631.07	1200	9328.47
1201	6710.25	1201	4861.54	1201	8739.44	1201	7899.72	1201	13911.1	1201	17148.6	1201	6876.37	1201	8541.85
1202	6393.78	1202	5005.43	1202	9563.03	1202	6829.68	1202	12984.8	1202	14287.4	1202	6397	1202	7781
1203	7192.41	1203	5251.59	1203	9285.92	1203	6598.77	1203	10521.1	1203	12154	1203	7049.95	1203	8718.94
1204	6832.1	1204	5861.69	1204	9843.82	1204	8105.5	1204	11433	1204	12604.9	1204	7154.93	1204	8565.41
1205	5094.8	1205	4849.77	1205	10523.7	1205	8033.29	1205	12593	1205	13913.6	1205	7417.73	1205	7375.04
1206	4359.48	1206	3964.14	1206	13553	1206	16156.7	1206	13904.3	1206	15205.9	1206	7873.75	1206	6050.56
1207	3707.1	1207	2626.72	1207	14013	1207	15433.1	1207	14512.3	1207	13328.7	1207	6623.5	1207	5458.85
1208	3612.99	1208	2738.04	1208	14374.5	1208	17396.6	1208	16230.9	1208	14592.5	1208	5078.87	1208	4979.67
1209	3577.73	1209	2314.29	1209	16196.6	1209	17684.9	1209	15101.7	1209	14565.5	1209	3720.18	1209	3959.7
1210	3271.88	1210	2452.96	1210	16081.5	1210	16797.4	1210	17719.9	1210	15794.5	1210	3762.45	1210	4977.81
1211	2563.13	1211	2245.03	1211	13748.6	1211	10783.4	1211	13980.8	1211	12121.2	1211	3633.69	1211	4427.62
1212	2060.09	1212	2314.91	1212	12054.2	1212	8747.9	1212	10555.2	1212	9907.18	1212	4489.67	1212	6306.25
1213	2487.45	1213	3013.66	1213	10301.3	1213	8049.29	1213	8638.3	1213	8385.95	1213	5347.46	1213	5464.44
1214	2770.58	1214	3118.75	1214	8005.4	1214	5964.13	1214	8774.13	1214	10345.4	1214	6714.78	1214	6830.56
1215	2544.52	1215	2585.83	1215	7236.09	1215	6084.17	1215	8353.14	1215	10079.8	1215	5529.84	1215	6154.07
1216	1830.5	1216	1498.56	1216	7179.27	1216	7628	1216	7943.59	1216	9883.99	1216	5176.18	1216	6058.86
1217	2341.16	1217	2005.56	1217	7723.25	1217	8906.21	1217	7562.23	1217	10124.4	1217	6029.75	1217	7188.59
1218	2504.02	1218	2434.73	1218	9237.75	1218	8193.29	1218	7598.74	1218	6687.36	1218	6001.03	1218	5878.67
1219	1574.01	1219	1667.53	1219	8606.78	1219	9465.93	1219	8017.93	1219	6574.02	1219	6344.29	1219	4616.98
1220	1984.71	1220	2158.64	1220	6306.02	1220	6757.03	1220	8164.2	1220	6122.98	1220	5934.92	1220	4105.14
1221	1714.37	1221	2459.39	1221	5966.21	1221	7200.25	1221	8972.86	1221	7800.85	1221	6422.42	1221	4424.61
1222	1284.57	1222	1463.74	1222	5326.69	1222	5916.64	1222	12676.5	1222	13670.4	1222	7102.71	1222	6692.18
1223	1838.43	1223	1397.67	1223	5942.73	1223	5765.5	1223	16830.3	1223	21051.9	1223	7397.68	1223	7000.04
1224	1082.08	1224	329.324	1224	5650.69	1224	5793.14	1224	18559.8	1224	19660.3	1224	7124.85	1224	7181.42
1225	1791.62	1225	1907.63	1225	5949.47	1225	5716.85	1225	15542.6	1225	14726.8	1225	6037.27	1225	6555.39
1226	2342.16	1226	3040.68	1226	6030.05	1226	7676.73	1226	14315.2	1226	15746.4	1226	5190.97	1226	5835.78
1227	2070.52	1227	2590.99	1227	6470.76	1227	9215.11	1227	14241.2	1227	16796.9	1227	4239.73	1227	4643.18
1228	2284.03	1228	2058.46	1228	7702.56	1228	9978.57	1228	14267.2	1228	18273	1228	3805.29	1228	5412.47
1229	2052.49	1229	2258.94	1229	8894.35	1229	9874.33	1229	10758.5	1229	14041.1	1229	4492.9	1229	6466.52
1230	3199.99	1230	2980.92	1230	9473.73	1230	9645.3	1230	8929.22	1230	10979.4	1230	4933.76	1230	6564.25
1231	3067.84	1231	3643.62	1231	8899.28	1231	8869.14	1231	7877.11	1231	9772.14	1231	5625.27	1231	6920.77
1232	3694.48	1232	4860.19	1232	12065.8	1232	10924.8	1232	10214	1232	13859.7	1232	4905.94	1232	6330.76
1233	3750.55	1233	4977.02	1233	11057.4	1233	12304.3	1233	7586.77	1233	10521.5	1233	3251.56	1233	4916.94
1234	4027.51	1234	4552.87	1234	11098	1234	11068	1234	7478.63	1234	10378.2	1234	6727.6	1234	11786.6
1235	4906.4	1235	5853.77	1235	8994.13	1235	10399.1	1235	7593.51	1235	8889.12	1235	5217.63	1235	9716.46
1236	5079.47	1236	6915.54	1236	8181.31	1236	10481.9	1236	9379.43	1236	8606.26	1236	6173.57	1236	9346.96
1237	4435.33	1237	6673.76	1237	7220.45	1237	9367.74	1237	8396.18	1237	7050.31	1237	8490.89	1237	11128.1
1238	3146.89	1238	4782	1238	5925.73	1238	7142.91	1238	9683.52	1238	8243.38	1238	7722.49	1238	8741.07
1239	2681.76	1239	5080.66	1239	6210.09	1239	5549.35	1239	7907.28	1239	5736.2	1239	6468.39	1239	8017.76
1240	3610.49	1240	5537.82	1240	6953.65	1240	6806.79	1240	7011.62	1240	6761.74	1240	5518.24	1240	6617.58
1241	4910.48	1241	7116.09	1241	6918.08	1241	7006.75	1241	8876.92	1241	9063.19	1241	4917.07	1241	5416.16
1242	4299.05	1242	6268.83	1242	6939.29	1242	7580.67	1242	9793.9	1242	9101.65	1242	5380.06	1242	6265.45
1243	3506.65	1243	5200.31	1243	7971.95	1243	8401.48	1243	11667.2	1243	12440.1	1243	7972.08	1243	7814.51
1244	2537.86	1244	3367.38	1244	8233.79	1244	6202.82	1244	12390.1	1244	13726.4	1244	11355.8	1244	9954.73
1245	2476.01	1245	2582.96	1245	7822.89	1245	5719.16	1245	12995.3	1245	14648.3	1245	16198.4	1245	16440.3
1246	2276.34	1246	2491.24	1246	7887.99	1246	6466.76	1246	13455.6	1246	14367.4	1246	17309.6	1246	17411.6
1247	1839.64	1247	3155.93	1247	10074	1247	8827.06	1247	12237.2	1247	12393.7	1247	15723.3	1247	17579.2
1248	1299.43	1248	1135.06	1248	11976.9	1248	9010.35	1248	11377.4	1248	11829.6	1248	13375.2	1248	13956.7
1249	1403.52	1249	1475.4	1249	11675.9	1249	10254.8	1249	8942.08	1249	9909.5	1249	12468.8	1249	14514
1250	1501.57	1250	1475.07	1250	10299.2	1250	10820.5	1250	8907.48	1250	8942.41	1250	12239.6	1250	14015.4
1251	1885.49	1251	2278.61	1251	10450.8	1251	11176.2	1251	7760.02	1251	8320.81	1251	11700	1251	13297.7
1252	2424.47	1252	3272.16	1252	8573.85	1252	8608.99	1252	8077.38	1252	7436.38	1252	10680.8	1252	12649.9
1253	3520.58	1253	4373.59	1253	6932.86	1253	6799.27	1253	9506.78	1253	8198.12	1253	11787.3	1253	15846.7
1254	3741.76	1254	4344.45	1254	3459.31	1254	4856.56	1254	9388.81	1254	9146.46	1254	10581.2	1254	12526.2
1255	3809.15	1255	4959.17	1255	3125.18	1255	5674.69	1255	8858.74	1255	8844.56	1255	10057.1	1255	12527.6
1256	3607.24	1256	3818.14	1256	3694.2	1256	5395.94	1256	11721.8	1256	13720.2	1256	10210.3	1256	12772.3
1257	3231.38	1257	3502.11	1257	4369.09	1257	5436.71	1257	12709.3	1257	14513.1	1257	10100.2	1257	12531.4
1258	2980.58	1258	3154.26	1258	3374.37	1258	4555.51	1258	11279.1	1258	12458.5	1258	10956.4	1258	13470.9
1259	2896.92	1259	2543.26	1259	5962.15	1259	6174.04	1259	16021.8	1259	16464	1259	10566.7	1259	10729.6
1260	3349.07	1260	3002.33	1260	7140.95	1260	8215.93	1260	13794.2	1260	12905.6	1260	10725.4	1260	9306.88
1261	3285.4	1261	3665.62	1261	7955.88	1261	9381.22	1261	16335	1261	15656.8	1261	13273.5	1261	12862.9
1262	3318.18	1262	3631.32	1262	7596.65	1262	7736.52	1262	14382.8	1262	14087.3	1262	13345.5	1262	12781.7
1263	3492.4	1263	3332.3	1263	6107.96	1263	5808.77	1263	12043.5	1263	12867.2	1263	13972	1263	12307.1
1264	4626.74	1264	3952.9	1264	6518.28	1264	9174.51	1264	9001.51	1264	11612.3	1264	18334.2	1264	19980.6
1265	3328.8	1265	2652.63	1265	6115.17	1265	7925.99	1265	8775.49	1265	10072.1	1265	17781.2	1265	17151.8
1266	2314.78	1266	1504.48	1266	9064.13	1266	9641	1266	9316.33	1266	9678.44	1266	16811.1	1266	19529
1267	1683.56	1267	1023.63	1267	9055.67	1267	9704.72	1267	9552.18	1267	9811.21	1267	16570.9	1267	18222.3
1268	1853.78	1268	1132.46	1268	9598.69	1268	11393.8	1268	11111.9	1268	14034.5	1268	13520.9	1268	17282
1269	2307.25	1269	1479.29	1269	13310.7	1269	15387.6	1269	13626.4	1269	17072.1	1269	12651.1	1269	14730.4
1270	3312.54	1270	3546.35	1270	12736.9	1270	14421.2	1270	12894.2	1270	17050.7	1270	12401.3	1270	13648.4
1271	4388.56	1271	4508.48	1271	15220.2	1271	14456	1271	12750.8	1271	17772.9	1271	10042.5	1271	13010.7
1272	4673.69	1272	4856.02	1272	14565.4	1272	13639.1	1272	13462	1272	17972.1	1272	11585.9	1272	12138.5
1273	5279.46	1273	6483.94	1273	15817.8	1273	11824.9	1273	13535.6	1273	19836.9	1273	11518.3	1273	13400.1
1274	4732.56	1274	6247.24	1274	14871.7	1274	11082.4	1274	13342.4	1274	21063.2	1274	11181.7	1274	14108.5
1275	3672.39	1275	4787.18	1275	13366	1275	10961	1275	12741.1	1275	19357.3	1275	6833.12	1275	8240.83
1276	3220.5	1276	5044.8	1276	11653.4	1276	8452.02	1276	11358.2	1276	17940.5	1276	5661.28	1276	6485.71
1277	2778.35	1277	4397.94	1277	10611.9	1277	8315.18	1277	12891.5	1277	15661.3	1277	6034.06	1277	6636.28
1278	3291.48	1278	4775.45	1278	8209.01	1278	6324.55	1278	15289.7	1278	19668.3	1278	7302.46	1278	8110.29
1279	3256.61	1279	4901.53	1279	7459.98	1279	6895.79	1279	13125.8	1279	20808.3	1279	5924.48	1279	5834.51
1280	7665.44	1280	8647.66	1280	8051.81	1280	8368.67	1280	11444.8	1280	18697.9	1280	5757.98	1280	6443.87
1281	7547.19	1281	8218	1281	10068.9	1281	11914.8	1281	11326.3	1281	17619.6	1281	5272.85	1281	5501.11
1282	6009.92	1282	6745.95	1282	11482.3	1282	13126.3	1282	10817.4	1282	16466	1282	5698.11	1282	6124.51
1283	8473.65	1283	8267.73	1283	14136.6	1283	15759.4	1283	10176.8	1283	15203.8	1283	6802.09	1283	6563.28
1284	7151.2	1284	6940.17	1284	17477.3	1284	16800.8	1284	8918.4	1284	11469.6	1284	6648.15	1284	6789.94
1285	8700.71	1285	8677.71	1285	19450.7	1285	17769.9	1285	8975.26	1285	10874.4	1285	6762.68	1285	6781.76
1286	8727.09	1286	9014.68	1286	19475.5	1286	19500.9	1286	9280.94	1286	10362	1286	7279.59	1286	7237.25
1287	6204.69	1287	6261.81	1287	15565.7	1287	15182.3	1287	9188.71	1287	9601.26	1287	8530.07	1287	10050.7
1288	7883.48	1288	8945.51	1288	13337.4	1288	13454.6	1288	8150.67	1288	7995.43	1288	8142.97	1288	9413.53
1289	5592.5	1289	4965.12	1289	13052.9	1289	11834	1289	9060.74	1289	8624.4	1289	8431.28	1289	9752.78
1290	5437.1	1290	4907.72	1290	12817.4	1290	8152.53	1290	7265.38	1290	7083.38	1290	7830.83	1290	8247.27
1291	6160.23	1291	5438.55	1291	12454.4	1291	7743.06	1291	4841.35	1291	6135.68	1291	7441.78	1291	7212.48
1292	6228.91	1292	5052.92	1292	12596.9	1292	8904.33	1292	4688.53	1292	4111.54	1292	6809.93	1292	7231.94
1293	6534.45	1293	4515.35	1293	11146.2	1293	9904.68	1293	6919.95	1293	6255.47	1293	6271.27	1293	6685.47
1294	7118.36	1294	4274.63	1294	12442.3	1294	11247.8	1294	7511.18	1294	8800.01	1294	6982.54	1294	8107.57
1295	8030.65	1295	4556.68	1295	13368.4	1295	10552.6	1295	7957.94	1295	9599.75	1295	6404.33	1295	6258.79
1296	5370.92	1296	2965.66	1296	14234.3	1296	9982.59	1296	8204.19	1296	11452.3	1296	7545.86	1296	6745.93
1297	5422.64	1297	3031.55	1297	14198.8	1297	10462.4	1297	7882.93	1297	9764.5	1297	10272.4	1297	9045.48
1298	3442.39	1298	2385.82	1298	14062.5	1298	10858.4	1298	8340.69	1298	9228.83	1298	8158.26	1298	7710.09
1299	4767.36	1299	4302.39	1299	13427.6	1299	10146.7	1299	8017.76	1299	8225.23	1299	9717.36	1299	10459.6
1300	4323.2	1300	5348.01	1300	13834.2	1300	11120.6	1300	7620.07	1300	7566.66	1300	10017.3	1300	13402.9
1301	3953.69	1301	5179.9	1301	13866.1	1301	10811.6	1301	9211.1	1301	7971.49	1301	10951.2	1301	11539.1
1302	3865.99	1302	4625.25	1302	13805.9	1302	8586.87	1302	9324.53	1302	7946.16	1302	10427.2	1302	11034.8
1303	4112.91	1303	4937.72	1303	13009	1303	9295.72	1303	9565.11	1303	8357.75	1303	10550.8	1303	10382.9
1304	3412.76	1304	4215.77	1304	13329.6	1304	8862.83	1304	9280.64	1304	8297.77	1304	10529.5	1304	9999.34
1305	3486.93	1305	4094.17	1305	11917.5	1305	7964.98	1305	8708.94	1305	8811.82	1305	11150.5	1305	12274.7
1306	2632.79	1306	3413.74	1306	10971.9	1306	6170.3	1306	7382.31	1306	8587.52	1306	11078.3	1306	9988.5
1307	3245.4	1307	4124.79	1307	12453.3	1307	6810.44	1307	5607.88	1307	7300.09	1307	9372.01	1307	5986.18
1308	3852.63	1308	2946.57	1308	12693.9	1308	7210.37	1308	4667.99	1308	5960.44	1308	7081.66	1308	4119.5
1309	2949.79	1309	1870.78	1309	13989.8	1309	9321.44	1309	4669.36	1309	5638.34	1309	7026.18	1309	4740.95
1310	4078.95	1310	2792.34	1310	15026.9	1310	11015.7	1310	3397.22	1310	4808.85	1310	8111.57	1310	6963.52
1311	2538.93	1311	2439.22	1311	13762.5	1311	10456.3	1311	4161.75	1311	4564.58	1311	8706.29	1311	7890.7
1312	2206.55	1312	3648.1	1312	12377.6	1312	7731.26	1312	6618.31	1312	6327.98	1312	9534.81	1312	8608.21
1313	4816.88	1313	5744.82	1313	12576.8	1313	8193.93	1313	5651.06	1313	5885.27	1313	8674.49	1313	7598.15
1314	5568.53	1314	6106.96	1314	14184.3	1314	9723.88	1314	9636.9	1314	9746.63	1314	8749.64	1314	9464.85
1315	5361.25	1315	5737.83	1315	12356.8	1315	9388.29	1315	7675.37	1315	8240.75	1315	8064.42	1315	8440.95
1316	6381.68	1316	5684.83	1316	10513.6	1316	7861.65	1316	9390.05	1316	9244.26	1316	8404.52	1316	7788.65
1317	5598.76	1317	3825.21	1317	9858.95	1317	5904.18	1317	8567.83	1317	9648.75	1317	7797.81	1317	7490.22
1318	5615.97	1318	4580.47	1318	11100.5	1318	6501.68	1318	7532.8	1318	9419.47	1318	9287.86	1318	7577.8
1319	5091.23	1319	4681.88	1319	10411.4	1319	6207.46	1319	8700.86	1319	8812.4	1319	10864.7	1319	8978.29
1320	6699.99	1320	7688.99	1320	11851.3	1320	8412.08	1320	10202.7	1320	9229.6	1320	11353	1320	11034.2
1321	7891.08	1321	8517.04	1321	10928.2	1321	8450.9	1321	11636.5	1321	9550.78	1321	12297.6	1321	12690.9
1322	8436.6	1322	8016.23	1322	13277.9	1322	11130	1322	10617.4	1322	9585.57	1322	11664.4	1322	13381.8
1323	8648.73	1323	8012.96	1323	13011.1	1323	11194.3	1323	7120.73	1323	6525.12	1323	11481.2	1323	13424.5
1324	7496.81	1324	5683.72	1324	13159.8	1324	12397.7	1324	4554.77	1324	4770.59	1324	11972.2	1324	12824.1
1325	6322.29	1325	4467.52	1325	13854.1	1325	12405.7	1325	5762.02	1325	6011.78	1325	11963	1325	12778.5
1326	7563.51	1326	5449.79	1326	15310.1	1326	13590.7	1326	6006.49	1326	7131.26	1326	11656.8	1326	11954.1
1327	7390.21	1327	6908.69	1327	16631	1327	15244.5	1327	7301.08	1327	9111.68	1327	11517	1327	10830
1328	6570.84	1328	5712.73	1328	14382.6	1328	14329.6	1328	7971.83	1328	8784.06	1328	10862.4	1328	10817
1329	7180.13	1329	7770.94	1329	17882.4	1329	17151.3	1329	8079.85	1329	8286.41	1329	8986.2	1329	10186
1330	7669.9	1330	8124.5	1330	11678.8	1330	11925.9	1330	9078.14	1330	8580.73	1330	7361.65	1330	9121.05
1331	5896.35	1331	6118.67	1331	10484.1	1331	9387.45	1331	9264.72	1331	9611.65	1331	8680.34	1331	8271.27
1332	4365.48	1332	5467.6	1332	9457.84	1332	7762.83	1332	9004.97	1332	10435.2	1332	8169.24	1332	7700.83
1333	3566.7	1333	6050.15	1333	7048.51	1333	5263.82	1333	9245.87	1333	10987.9	1333	9097.75	1333	7404.75
1334	7465.74	1334	7452.91	1334	4997.18	1334	3360.29	1334	11184	1334	12457.6	1334	10816	1334	10788.6
1335	6308.83	1335	6428.84	1335	7585.98	1335	4682.02	1335	11317.1	1335	12523.6	1335	11637.5	1335	13130.6
1336	8144.36	1336	7130.89	1336	5648.36	1336	3525.45	1336	13240.3	1336	14186.5	1336	8441.98	1336	11378.2
1337	9687.85	1337	8113.86	1337	4498.59	1337	2513.42	1337	12749.8	1337	12813.4	1337	5852.95	1337	7488.53
1338	8002.3	1338	6634.96	1338	5373.24	1338	3467.84	1338	11469.3	1338	10276.4	1338	6690.53	1338	6421.03
1339	8691.57	1339	7499.57	1339	7219.44	1339	5962.56	1339	11088.7	1339	10013.2	1339	8589.5	1339	8258.64
1340	7994.02	1340	6514.2	1340	9338.81	1340	6824.24	1340	11929.5	1340	11897.4	1340	9342.71	1340	9887.35
1341	7826.02	1341	7613.08	1341	10945.8	1341	10042.5	1341	12832.5	1341	12721.6	1341	10972.8	1341	11928.5
1342	6960.31	1342	7654.19	1342	15845.2	1342	10584.6	1342	10962.1	1342	11428.5	1342	12481.3	1342	13660.1
1343	6205.23	1343	7098.47	1343	19144	1343	11925.7	1343	10596	1343	10658	1343	12527.7	1343	11274
1344	5426.15	1344	5867.07	1344	19543.9	1344	14607.3	1344	12363.7	1344	11228.4	1344	14660	1344	11295.2
1345	5403.66	1345	5458.48	1345	24697.5	1345	18650.6	1345	12321	1345	12485.4	1345	12597.7	1345	7176.89
1346	4469.99	1346	4351.73	1346	24507.2	1346	19527.7	1346	13031.4	1346	13817.4	1346	9022.16	1346	4415.3
1347	4068.95	1347	3605.44	1347	15119.5	1347	12405.4	1347	11897	1347	13174	1347	6454.53	1347	3364.15
1348	3917.39	1348	4401.24	1348	10218.7	1348	8630.8	1348	11364.1	1348	12646	1348	4609.57	1348	1761.99
1349	3777.83	1349	4891.03	1349	9682.07	1349	7804.18	1349	9639.47	1349	9808.7	1349	6185.19	1349	3436.24
1350	4002.59	1350	4787.53	1350	9540.99	1350	6700.01	1350	8940.75	1350	9210.95	1350	5310.29	1350	3210.82
1351	4894.26	1351	5028.47	1351	10196.4	1351	6914.17	1351	9631.5	1351	8691.66	1351	9134.82	1351	7440.8
1352	6403.24	1352	6566.92	1352	11813.1	1352	7926.74	1352	9139.52	1352	7892.16	1352	9858.15	1352	8432.13
1353	6569.35	1353	6860.48	1353	12219.6	1353	9237.51	1353	8584.56	1353	7769.61	1353	11238.3	1353	9280.39
1354	6256.88	1354	6968.23	1354	12585.9	1354	10132.8	1354	8632.33	1354	7945.5	1354	12370.6	1354	11175.3
1355	5603.72	1355	5791.79	1355	11491.1	1355	11755.4	1355	7683.08	1355	6369.22	1355	13195.9	1355	13303.7
1356	6655.69	1356	5954.79	1356	12606.5	1356	9684.35	1356	6595	1356	6395.88	1356	13800	1356	14831.9
1357	8047.58	1357	7279.2	1357	14421.8	1357	12039.9	1357	6433.36	1357	6463.25	1357	12112.7	1357	15991.3
1358	8720.54	1358	9053.75	1358	16666.5	1358	14641.9	1358	7235.54	1358	6600.46	1358	12124.8	1358	16516.7
1359	9377.08	1359	9944.62	1359	19992.7	1359	18172.4	1359	7448.28	1359	6939.06	1359	12316.6	1359	17645.4
1360	8828.67	1360	8505.83	1360	22289	1360	19288.2	1360	6400.41	1360	7230.76	1360	11126.3	1360	15632.6
1361	11400	1361	9522.09	1361	22371.5	1361	19951.2	1361	6742.48	1361	7527.57	1361	9558.81	1361	13105.2
1362	10996.2	1362	8512.33	1362	26338.3	1362	20131.1	1362	7859.67	1362	10089.2	1362	8681.32	1362	11354.3
1363	10616	1363	8177.63	1363	30319	1363	21763.5	1363	9332.97	1363	10552.6	1363	10628.3	1363	12410.4
1364	11273.3	1364	9923.15	1364	31976.2	1364	22959.8	1364	6804.56	1364	7068.02	1364	9816.49	1364	10989.8
1365	9410.63	1365	7919.81	1365	32051.1	1365	26032.3	1365	5127	1365	3870.26	1365	10783.1	1365	9542.84
1366	6976.21	1366	7195.03	1366	28618.4	1366	26958.3	1366	4599.47	1366	2973.46	1366	9951.88	1366	10321.6
1367	6412.18	1367	7443.06	1367	24726.6	1367	24059.2	1367	4087.38	1367	2270.32	1367	9556.95	1367	9515.21
1368	7513.03	1368	5512.21	1368	24686.7	1368	24399.9	1368	3682.08	1368	2890.41	1368	10710.9	1368	10544.4
1369	6882.02	1369	3896.1	1369	23970.5	1369	23080.3	1369	3745.92	1369	3350.26	1369	10783.2	1369	10090.8
1370	10107.6	1370	6641.09	1370	22732.6	1370	20572.9	1370	5937.56	1370	6327.09	1370	10264.2	1370	10896.9
1371	8619.29	1371	6060.43	1371	22339.7	1371	20060.3	1371	4075.34	1371	4058.56	1371	10642.4	1371	11011
1372	8851.43	1372	7356.51	1372	20942.6	1372	20147.3	1372	7120.25	1372	7809.93	1372	11406.4	1372	10994.8
1373	7830.14	1373	7572.65	1373	16824.5	1373	19521.1	1373	6911.2	1373	5721.79	1373	11373.2	1373	8880.14
1374	9128.29	1374	9165.99	1374	14321.4	1374	15642	1374	11844.3	1374	9004.81	1374	11574.6	1374	9672.72
1375	7338.48	1375	6992.1	1375	10489.5	1375	10782.7	1375	12189.6	1375	9304.49	1375	6551.22	1375	3510.23
1376	7745.26	1376	7078.46	1376	11819.9	1376	11389.6	1376	14284.6	1376	12553.4	1376	9172.35	1376	6234.68
1377	7688.91	1377	7059.8	1377	13051.5	1377	14406.6	1377	18567.8	1377	14160.2	1377	9677.59	1377	7874.39
1378	7590.79	1378	7126.55	1378	13118.4	1378	14768.3	1378	14871.7	1378	12136.8	1378	10931.1	1378	8226.86
1379	8042.15	1379	6732.98	1379	14161.5	1379	16761.8	1379	13940.5	1379	10145.7	1379	11558.4	1379	9830.74
1380	8230.66	1380	6072.76	1380	15115.3	1380	17377.8	1380	12044.2	1380	8561.57	1380	12414.8	1380	12247.1
1381	8087.4	1381	7102.98	1381	14128.5	1381	10825.4	1381	10988	1381	8703.06	1381	11121.7	1381	12930
1382	8344.57	1382	7512.25	1382	7298.41	1382	6548.8	1382	9505.81	1382	9051.53	1382	10821.3	1382	12478.5
1383	6767.21	1383	6714.54	1383	7452.15	1383	4425.44	1383	10496.3	1383	10374.8	1383	11396.5	1383	12236.9
1384	6244.88	1384	5522.77	1384	4027.34	1384	3174.56	1384	11385.1	1384	10702.7	1384	11424.2	1384	12076.1
1385	7155.14	1385	6862.56	1385	2816.2	1385	1998.24	1385	9974.21	1385	8766.89	1385	12124.5	1385	12117.5
1386	7422.91	1386	7136.39	1386	3506.24	1386	4928.45	1386	9326.27	1386	8248.14	1386	13930	1386	14543.7
1387	7194.52	1387	6612.4	1387	2682.07	1387	1944.15	1387	10022	1387	9753.58	1387	15026.4	1387	17163.2
1388	6255.84	1388	6169.15	1388	3037.55	1388	1079.5	1388	10723.1	1388	11012.1	1388	14877.6	1388	16626.7
1389	6211.14	1389	4589.41	1389	5607.03	1389	3637.27	1389	11214.9	1389	11590.1	1389	14014.6	1389	15575.5
1390	6055.21	1390	4839.08	1390	3842.12	1390	2747.54	1390	10846	1390	10964	1390	13869.6	1390	15109.2
1391	5892.41	1391	4377.64	1391	5641.42	1391	3418.79	1391	10707.8	1391	10260.2	1391	14872.1	1391	16183.9
1392	5562.06	1392	4298.08	1392	8446.97	1392	5341.99	1392	11371.3	1392	10721.6	1392	16033.5	1392	16865
1393	7529.23	1393	5755.6	1393	8221.77	1393	4612.98	1393	10326	1393	10123.2	1393	16449.5	1393	16928.1
1394	6863.75	1394	4906.75	1394	7697.9	1394	4534.28	1394	8489.27	1394	8761.68	1394	16312.5	1394	16472
1395	7879.86	1395	6768.22	1395	10060	1395	6838.95	1395	7922.98	1395	8421.17	1395	15665	1395	15716.4
1396	7463.32	1396	7615.79	1396	12563.7	1396	7655	1396	6503.88	1396	6934.46	1396	15344.4	1396	16410.2
1397	7111.72	1397	6316.71	1397	12870.1	1397	12068.5	1397	8114.87	1397	9081.54	1397	15512	1397	16968.4
1398	7696.56	1398	6095.7	1398	12183.7	1398	14539.7	1398	9475.31	1398	9836.92	1398	15726.2	1398	17169.1
1399	6791.41	1399	4903.45	1399	12799.9	1399	18378	1399	10543	1399	8333.55	1399	15139.9	1399	15880.6
1400	6671.94	1400	4330.69	1400	11918.5	1400	18766.9	1400	10112.1	1400	8923.15	1400	15893.7	1400	15634.7
1401	6605.7	1401	3178.32	1401	8595.12	1401	14945.5	1401	8543.92	1401	8274.86	1401	14516.3	1401	15991
1402	7361.4	1402	5058.72	1402	7575.69	1402	11866.9	1402	7952.74	1402	7006.96	1402	14951.2	1402	15361.8
1403	7965.63	1403	6037.07	1403	6989.85	1403	8049.86	1403	6077.84	1403	5414.3	1403	15824.3	1403	17172.2
1404	7765.04	1404	7712.54	1404	7165.77	1404	7538.98	1404	5950.16	1404	6249.67	1404	12637.3	1404	16021.2
1405	6638.38	1405	6047.6	1405	6011.93	1405	5577.02	1405	7357.36	1405	6942.21	1405	14139.9	1405	16860
1406	6478.94	1406	4437.37	1406	5609.61	1406	4705.98	1406	7054.74	1406	6280.29	1406	14155.7	1406	16991.1
1407	6310.57	1407	3481.78	1407	6661.36	1407	5907.56	1407	8042.18	1407	10027.7	1407	13676.9	1407	15725.6
1408	6883.33	1408	3306.9	1408	7413.89	1408	6659.4	1408	7421.21	1408	10179.6	1408	13891.3	1408	15943.1
1409	9107.96	1409	5868.24	1409	6707.1	1409	7849.52	1409	7047.39	1409	10001.6	1409	14201.6	1409	14474.2
1410	12340.3	1410	10128.9	1410	13667	1410	12119.8	1410	8095.32	1410	11281.3	1410	12606.6	1410	11108.2
1411	10803.6	1411	8852.78	1411	13225.3	1411	14220	1411	7243.86	1411	10084.3	1411	12726.6	1411	9915.41
1412	9300.01	1412	6980.68	1412	17842	1412	18013.5	1412	6960.44	1412	8589.62	1412	10593.5	1412	6630.11
1413	7205.08	1413	4469.58	1413	18927.2	1413	16242.4	1413	6329.44	1413	7178.17	1413	9002.84	1413	5633.4
1414	5733.07	1414	3391.98	1414	18720.5	1414	16244	1414	5348.8	1414	6902.3	1414	7875.21	1414	5004.22
1415	6556.17	1415	5256.86	1415	19043.4	1415	14140.8	1415	5832.21	1415	8454.56	1415	6882.78	1415	3128.22
1416	4892.39	1416	3822.63	1416	20303.4	1416	13076	1416	5120.3	1416	8141.87	1416	4947.94	1416	1891.7
1417	5521.41	1417	5687.82	1417	21553	1417	14990.4	1417	7827.26	1417	10505	1417	7271.91	1417	3854.17
1418	5704.47	1418	5972.07	1418	23187.1	1418	17300.9	1418	6041.52	1418	9025.36	1418	7564.49	1418	5417.63
1419	4885.94	1419	5523.7	1419	21583.7	1419	20162.9	1419	6337.81	1419	8678.44	1419	7645.8	1419	5441.35
1420	4607.01	1420	5444.88	1420	17972.9	1420	19159.1	1420	6107.86	1420	8526.59	1420	10534.6	1420	10109.9
1421	5339.12	1421	5144.74	1421	15437.2	1421	17189.7	1421	6425.56	1421	7957.13	1421	8577.15	1421	6741.43
1422	5411.11	1422	5835.77	1422	13695.5	1422	13857.8	1422	7673.38	1422	7656.65	1422	7191	1422	6975.22
1423	4058.05	1423	4036.77	1423	15886.7	1423	13041.2	1423	6719.7	1423	8849.09	1423	6464.03	1423	5311.81
1424	3222.99	1424	3059.07	1424	16188.5	1424	15486.2	1424	6878.11	1424	8990.23	1424	7396.8	1424	7877.86
1425	3091.07	1425	2378.49	1425	21275.4	1425	16522.1	1425	7371.06	1425	9497.52	1425	6164.52	1425	4902.07
1426	3989.67	1426	2338.39	1426	21908.9	1426	17586.9	1426	6502.66	1426	7315.73	1426	6825.18	1426	4431.34
1427	5021.87	1427	2991.68	1427	23697.4	1427	18702.4	1427	7050.14	1427	6811.23	1427	9327.89	1427	7421.52
1428	5413.51	1428	3463.01	1428	21292.7	1428	15445	1428	7811.04	1428	7306.64	1428	7860.41	1428	5184.93
1429	5471.8	1429	4372.76	1429	20475.5	1429	13554.9	1429	8689.91	1429	7263.18	1429	7014.14	1429	4576.39
1430	5441.28	1430	4162.02	1430	21771.9	1430	15379.9	1430	8857.07	1430	7098.01	1430	8836.16	1430	6586.72
1431	5354.14	1431	4891.86	1431	21574.2	1431	15519	1431	10290.1	1431	7706.08	1431	8368.37	1431	6371.44
1432	4774.49	1432	4884.6	1432	21730.3	1432	16865.7	1432	11962.2	1432	8224.64	1432	7958.09	1432	6454.77
1433	4235.62	1433	3828.15	1433	23727.6	1433	18727.9	1433	12647.7	1433	10113.8	1433	11817.3	1433	11559.3
1434	4339.01	1434	3722.57	1434	19423.8	1434	14579.7	1434	13733.8	1434	12562.9	1434	10277.6	1434	8987.62
1435	4246.91	1435	3499.18	1435	15819.5	1435	10655.1	1435	16079.3	1435	14377	1435	9861.1	1435	7155.9
1436	4925.12	1436	3395.41	1436	15092.2	1436	10813.6	1436	15461	1436	14659.2	1436	10017.3	1436	7403.83
1437	7079.92	1437	4494.06	1437	15088.6	1437	12496.9	1437	17793	1437	16501.1	1437	15887	1437	12529.7
1438	8643.04	1438	6863.01	1438	14537.1	1438	9478.12	1438	16812.8	1438	15063.9	1438	12758.9	1438	9688.44
1439	8579.15	1439	6682.86	1439	15244.5	1439	10037.9	1439	16200.1	1439	15623.8	1439	11922.7	1439	8514.02
1440	9367.51	1440	9252.65	1440	15377.9	1440	14888	1440	15929.8	1440	15875.5	1440	10364.2	1440	6116.67
1441	8197.85	1441	8958.92	1441	13800.6	1441	16976.7	1441	15884.3	1441	14495.4	1441	8334.89	1441	4697.53
1442	9343.46	1442	9203.25	1442	16047.9	1442	15905.9	1442	14836.1	1442	14910.4	1442	8058.28	1442	5102.94
1443	6803.07	1443	7161.81	1443	18637.6	1443	15240.9	1443	14477.5	1443	13419.6	1443	16438.4	1443	11665.4
1444	3315.43	1444	4360.39	1444	21025.2	1444	17074.4	1444	14411	1444	13679.7	1444	18232.5	1444	14690.8
1445	3566.68	1445	4131.58	1445	20191.7	1445	14782.8	1445	11191.3	1445	11775.4	1445	18963	1445	17259.9
1446	4515.6	1446	5076.53	1446	18219.1	1446	14744.7	1446	11217.8	1446	12785.1	1446	18838.3	1446	18756.2
1447	3871.11	1447	4109.55	1447	15247.5	1447	10855.7	1447	9734.42	1447	11642.5	1447	18381.7	1447	18929.8
1448	4670.59	1448	4511.16	1448	12187	1448	10307.4	1448	6094.38	1448	8920.02	1448	17723.3	1448	18915.7
1449	3634.71	1449	4009.53	1449	13260.4	1449	12529.9	1449	5071.57	1449	7373.43	1449	15847.9	1449	18530.1
1450	5205.72	1450	4788.62	1450	13720	1450	12615.1	1450	4488.37	1450	5630.48	1450	13973	1450	16686.2
1451	4124.05	1451	4661.54	1451	14858.5	1451	10265.6	1451	2445.29	1451	3665.12	1451	13013.8	1451	14984.8
1452	4354.16	1452	5226.77	1452	13531.9	1452	10538.2	1452	3044.12	1452	4161.83	1452	12223.3	1452	13126.8
1453	5468.65	1453	5810.35	1453	13831.2	1453	11066	1453	2878.58	1453	4621.94	1453	11891	1453	12182.6
1454	6226.51	1454	5102.05	1454	12040	1454	10235.1	1454	3252.44	1454	3694.83	1454	11763.9	1454	11710.5
1455	6459.42	1455	5362.47	1455	11025.8	1455	10085	1455	3374.71	1455	3694.45	1455	12009.6	1455	11932.5
1456	7158	1456	5747.34	1456	10509.2	1456	9144.68	1456	4124.24	1456	4817.28	1456	12347.9	1456	12624.1
1457	7375.87	1457	5881.6	1457	10507.2	1457	9214.67	1457	4699.27	1457	4565.43	1457	12872	1457	13110.5
1458	7693.76	1458	6422.03	1458	11224.2	1458	11326.6	1458	4819.52	1458	4814.26	1458	12635.2	1458	13198.4
1459	8685.43	1459	8900.87	1459	10739.1	1459	9370.76	1459	6256.5	1459	5123.01	1459	14055.5	1459	12512.4
1460	8667.99	1460	10631.5	1460	9460.49	1460	6975.65	1460	4383.34	1460	4172.92	1460	13305.9	1460	12724.5
1461	8066.38	1461	9491.73	1461	10530.3	1461	8820.17	1461	5280.3	1461	6108.19	1461	12529.2	1461	13267.2
1462	7709.68	1462	8242.66	1462	9435.77	1462	10774.6	1462	5409.81	1462	5582.71	1462	11090.7	1462	11627.3
1463	7595.99	1463	8028.05	1463	9701.45	1463	9762.23	1463	4426.77	1463	4335.34	1463	8973.68	1463	10395.1
1464	7832.01	1464	6610.1	1464	11410.2	1464	9770.78	1464	5523.42	1464	4531	1464	7273.73	1464	10096
1465	8256.12	1465	6816.84	1465	11793.2	1465	9437.67	1465	5354.57	1465	4424.61	1465	8854.7	1465	10482.6
1466	7859.47	1466	6688.4	1466	13727.2	1466	9851.2	1466	8660.02	1466	6124.09	1466	8299.52	1466	9799.69
1467	8153.4	1467	7082.39	1467	15226.5	1467	13002.5	1467	5292.97	1467	4448.44	1467	8802.68	1467	9626.95
1468	8519.09	1468	7591.42	1468	15821.9	1468	13396.3	1468	8096.48	1468	8414.86	1468	9372.46	1468	9991.51
1469	7885.58	1469	7215.68	1469	14657.8	1469	11736.8	1469	12456.6	1469	12339.7	1469	8753.45	1469	9733.32
1470	8109.48	1470	7128.85	1470	9727.58	1470	8212.81	1470	8705.78	1470	8414.08	1470	10156.4	1470	11328.2
1471	8858.64	1471	7340.19	1471	6611.02	1471	6601.96	1471	7222.76	1471	7706.43	1471	14144.1	1471	12429.4
1472	9134.08	1472	7902.68	1472	4722.68	1472	5856.19	1472	5825.6	1472	7334.19	1472	14569.7	1472	12420.6
1473	9500.51	1473	7347.56	1473	5712.85	1473	6208	1473	5595.95	1473	7106.06	1473	17780.2	1473	12370.9
1474	8495.99	1474	6382.82	1474	5129.21	1474	5332.7	1474	3615	1474	5389.14	1474	17180.1	1474	14063.5
1475	8187.16	1475	6852.03	1475	5697.7	1475	5820.12	1475	2242.79	1475	3409.5	1475	15590.7	1475	13672.5
1476	8217.31	1476	7983.27	1476	9026.63	1476	7154.49	1476	1493.37	1476	3052.42	1476	13026	1476	11270.4
1477	8542.93	1477	6817.81	1477	7384.82	1477	6143.49	1477	1067.2	1477	2715.6	1477	14325.8	1477	12821.4
1478	8893.28	1478	6151.2	1478	7200.32	1478	6084.45	1478	983.597	1478	2195.39	1478	13468.1	1478	14435.4
1479	8516.81	1479	6315.86	1479	6653.21	1479	5933.62	1479	1004.38	1479	2541.81	1479	14731.3	1479	17519.3
1480	7933.58	1480	5700.25	1480	5473.97	1480	5732.56	1480	2296.21	1480	3045.9	1480	16126.2	1480	19380.6
1481	8005.52	1481	6488.19	1481	4790.64	1481	6137.77	1481	4768.93	1481	4555.52	1481	14474	1481	20859.3
1482	8210.36	1482	5420.41	1482	4545.22	1482	6879.26	1482	7145.45	1482	8870.15	1482	10612	1482	15653.6
1483	8087.5	1483	4535.49	1483	4604.3	1483	4441.04	1483	10823.8	1483	11973.9	1483	6309.08	1483	9027.07
1484	7794.46	1484	5889.39	1484	5430.48	1484	7105.39	1484	14483.9	1484	13044.1	1484	8450.23	1484	11353.6
1485	8417.78	1485	7410.93	1485	4254.8	1485	6287.48	1485	16096	1485	13472.9	1485	5376.19	1485	5849.78
1486	9665.26	1486	7363.99	1486	5991.73	1486	8348.16	1486	16393.8	1486	13263.9	1486	7532.24	1486	8490.49
1487	10084.6	1487	8231.65	1487	6422.99	1487	8646.66	1487	14409.4	1487	10975.9	1487	7570.64	1487	9606.17
1488	8691.24	1488	7617.43	1488	5634.49	1488	7325.41	1488	13760.3	1488	12300.4	1488	9786.14	1488	11810
1489	8672.21	1489	6742.19	1489	7352.21	1489	7881.01	1489	14728.2	1489	13945	1489	11689.8	1489	11858.7
1490	8980.59	1490	6930.86	1490	7219.88	1490	7218.42	1490	13835.9	1490	12236	1490	13056.5	1490	13112.7
1491	10987.9	1491	9369.44	1491	7983.85	1491	6974.76	1491	13034.3	1491	10133.4	1491	12731.1	1491	11794.9
1492	10539.5	1492	10266.1	1492	8583.41	1492	9125.99	1492	10998.4	1492	8522.09	1492	11564.7	1492	10454.5
1493	12401.3	1493	13416.8	1493	8561.92	1493	10726.5	1493	9505.63	1493	8946.94	1493	10086.1	1493	9333.06
1494	14044.3	1494	11335.9	1494	8950.62	1494	13209.3	1494	8595.99	1494	7112.76	1494	8280.02	1494	7382.26
1495	12415.5	1495	10117	1495	10795.2	1495	11539.9	1495	9103.77	1495	8034.33	1495	5661.04	1495	4623.41
1496	13148	1496	10959.5	1496	10503.2	1496	14428.5	1496	8078	1496	7135.32	1496	4617.34	1496	4147.8
1497	9745.79	1497	9112.28	1497	11141.8	1497	11169.4	1497	9282.29	1497	10668.7	1497	3307.86	1497	3316.48
1498	9090.15	1498	6960.14	1498	10995.6	1498	11403.1	1498	8404.6	1498	7858.3	1498	4087.85	1498	2753.32
1499	9312.16	1499	7879.85	1499	11873.8	1499	12800.1	1499	9187.06	1499	11613.8	1499	3444.52	1499	2687.06
1500	11462.9	1500	10130.1	1500	11911.4	1500	11689.5	1500	11019.6	1500	11771.5	1500	2732.75	1500	3163.44
1501	12780.1	1501	11503.6	1501	12034.9	1501	11674.8	1501	11609.1	1501	12009.8	1501	3648.32	1501	2364.72
1502	13579.7	1502	10675.6	1502	12364.3	1502	9613.71	1502	11588	1502	10608.4	1502	5016.38	1502	3229.74
1503	11761	1503	11471.7	1503	12675.4	1503	10696.4	1503	10306.7	1503	10224.8	1503	4481	1503	3236.55
1504	10636.6	1504	8874.5	1504	12466.9	1504	10057.1	1504	9567.13	1504	8890.33	1504	4199.77	1504	3502.61
1505	9475.97	1505	8414.53	1505	11609.7	1505	10844.6	1505	6585.35	1505	7186.09	1505	7445.19	1505	3469.93
1506	9140.98	1506	7348.6	1506	10483.3	1506	13497.9	1506	4982.37	1506	4836.02	1506	6515.26	1506	3633.26
1507	9858.28	1507	7972.95	1507	13368.3	1507	17977.4	1507	7381.15	1507	7132.01	1507	5206.16	1507	3186.99
1508	8447.53	1508	7045.69	1508	15112.2	1508	19183.8	1508	5803.23	1508	7401.92	1508	10069.6	1508	6393.61
1509	8482.6	1509	6925.82	1509	14526.4	1509	18254.3	1509	5922.92	1509	7915.85	1509	7053.41	1509	4580.06
1510	8041.59	1510	5297.64	1510	13897.3	1510	14680.1	1510	8009.66	1510	11680.4	1510	5640.15	1510	4087.53
1511	6678.02	1511	5004.33	1511	16833.9	1511	16546.5	1511	7639.18	1511	10407.3	1511	5302.98	1511	4236.54
1512	5768.4	1512	4148.84	1512	17386.8	1512	15284.4	1512	7862.8	1512	8599.28	1512	5396.6	1512	3894.85
1513	5676.39	1513	6684.95	1513	16927.3	1513	15477.1	1513	7827.05	1513	8168.53	1513	7452.48	1513	5818.72
1514	4758.95	1514	6009.23	1514	13731.4	1514	13450.9	1514	7763.45	1514	8355.46	1514	7346.34	1514	5773.6
1515	4503.4	1515	6393.31	1515	11740.7	1515	11487	1515	8164.5	1515	10824.8	1515	6754.65	1515	5457.15
1516	3977.58	1516	5809.14	1516	11500.7	1516	10499.1	1516	8017.87	1516	11465.1	1516	6665.55	1516	5342.72
1517	3096.55	1517	4503.42	1517	11141.1	1517	11384.9	1517	6951.86	1517	8988.82	1517	6821.64	1517	7080.88
1518	3162.89	1518	2915.28	1518	12061	1518	12237.1	1518	5358.15	1518	7091.34	1518	7575.83	1518	7383.59
1519	2944.14	1519	2380.08	1519	12967.7	1519	12490.2	1519	5070.27	1519	6388.19	1519	7789.36	1519	7698.77
1520	2760.22	1520	2979.9	1520	10406.4	1520	10510	1520	4736.83	1520	6051.14	1520	13259.3	1520	11568.4
1521	5110.45	1521	4719.66	1521	11795.6	1521	12571.8	1521	3642.59	1521	4535.46	1521	11986.9	1521	11531.2
1522	5413.67	1522	5382.89	1522	12385.4	1522	12079.3	1522	2829.02	1522	4539	1522	11849.2	1522	11349.3
1523	5644.26	1523	5300.07	1523	9914.69	1523	7459.39	1523	3147.73	1523	5724.56	1523	12275.2	1523	9258.65
1524	4084.2	1524	3314.87	1524	10866.6	1524	6282.21	1524	3962.11	1524	6138.56	1524	11086.6	1524	7842.1
1525	3979.55	1525	2604.2	1525	7748.68	1525	5422.92	1525	4731.51	1525	5155.48	1525	15614.2	1525	11332.7
1526	2667.89	1526	1145.31	1526	6484.03	1526	4678.24	1526	4541.58	1526	2756.67	1526	12268.5	1526	8400.4
1527	2498.69	1527	1840.56	1527	5270.98	1527	5296.18	1527	4505.51	1527	4222.81	1527	9345.02	1527	7714.96
1528	1686.37	1528	1243.04	1528	4969.84	1528	5884.26	1528	7932.09	1528	7536.43	1528	8999.84	1528	8755.92
1529	3858.78	1529	2846.93	1529	5343.43	1529	7322.75	1529	7999.32	1529	7619.97	1529	9306.25	1529	8826.51
1530	2712.11	1530	1830.14	1530	6779.32	1530	9404.62	1530	10291.1	1530	9368.92	1530	8679.29	1530	8817.4
1531	4843.67	1531	4240.55	1531	8338.39	1531	9842.26	1531	8647.42	1531	7744.44	1531	9124.76	1531	7093.16
1532	5536.64	1532	5524.02	1532	8196.15	1532	8435.47	1532	9398.58	1532	10933.5	1532	8694.41	1532	7652.27
1533	7172.13	1533	6490.84	1533	9786.69	1533	9363.76	1533	9492.62	1533	11325.3	1533	8524.82	1533	8333.38
1534	7605.04	1534	6549.89	1534	9177.94	1534	9792.56	1534	8450.38	1534	10556.8	1534	8317.18	1534	6911.48
1535	5697.5	1535	5283.42	1535	9752.45	1535	9728.78	1535	8221.8	1535	9795.44	1535	10010.4	1535	8311.33
1536	5887.28	1536	5500.87	1536	12079.4	1536	10379.7	1536	8618.18	1536	8724.38	1536	10271.1	1536	7547.45
1537	5114.6	1537	5870.9	1537	10488.4	1537	10630.2	1537	8436.67	1537	8284.23	1537	11135.8	1537	7596.93
1538	3550.55	1538	4723.3	1538	9558.55	1538	11346.4	1538	8408.39	1538	9755.96	1538	11476.2	1538	7264.72
1539	6386.56	1539	9283.6	1539	7735	1539	9785.67	1539	10001.2	1539	11072.4	1539	9839.31	1539	5745.54
1540	3809.86	1540	5792.05	1540	7475.23	1540	7061.68	1540	11978.9	1540	12002.1	1540	10229.7	1540	6941.44
1541	3954.45	1541	4979.83	1541	7958.86	1541	7170.63	1541	11288.8	1541	11721.7	1541	8802.42	1541	6715.34
1542	7184.23	1542	9007.91	1542	7890.95	1542	7934.54	1542	12629.4	1542	12473.8	1542	6284.84	1542	4909.08
1543	5954.76	1543	7667.71	1543	8059.17	1543	7682.49	1543	13449.5	1543	15330.8	1543	5113.29	1543	4293.46
1544	7021.57	1544	9336.94	1544	11491.6	1544	8583.2	1544	14057.5	1544	15600.8	1544	4225.09	1544	3272.85
1545	8586.86	1545	11326.7	1545	13078.9	1545	10916.6	1545	15462.8	1545	17087.8	1545	7027.56	1545	5367.21
1546	8914.69	1546	10465.1	1546	12829.5	1546	11680.6	1546	15973.7	1546	15278	1546	6574.72	1546	5162.36
1547	10787.3	1547	11296.8	1547	13194.8	1547	12225	1547	16314.2	1547	15846	1547	7077.76	1547	5202.2
1548	10127	1548	9956.06	1548	11721.5	1548	12495.4	1548	15576	1548	16077.8	1548	7961.44	1548	4265.24
1549	10895.3	1549	9873.75	1549	10188.8	1549	12859.8	1549	14058.4	1549	14517.9	1549	7681.39	1549	3805.4
1550	9557.78	1550	8548.12	1550	10293.3	1550	12126.9	1550	12215.7	1550	13011.1	1550	7955.22	1550	4742.7
1551	11002.4	1551	9824.08	1551	10339.4	1551	12101.7	1551	12480.4	1551	13297.9	1551	8921.44	1551	4733.03
1552	9779.76	1552	9511.2	1552	9700.79	1552	12173.5	1552	14247.9	1552	15841.7	1552	9444.11	1552	4823.05
1553	8874.35	1553	8139.08	1553	8210.32	1553	11616.6	1553	15540.2	1553	17378.2	1553	9187.87	1553	5149.12
1554	8683.68	1554	8188.69	1554	11282.1	1554	15273.7	1554	15625.5	1554	14770.2	1554	10527.5	1554	7064.75
1555	10106.9	1555	8813.99	1555	9532.43	1555	13587.5	1555	14231.5	1555	12917.7	1555	11431.8	1555	8451.62
1556	10840	1556	8858.8	1556	9995.45	1556	13175.8	1556	13435.8	1556	12393.2	1556	11753.2	1556	8734.44
1557	10717.6	1557	8572.66	1557	9766.78	1557	14249.9	1557	11955.4	1557	8512.31	1557	11209.3	1557	8225.07
1558	12795	1558	11774.6	1558	12550.5	1558	15682.5	1558	8908.94	1558	6929.97	1558	8868.93	1558	5596.71
1559	14185.5	1559	13795.2	1559	12373.6	1559	16129.4	1559	9702.15	1559	8950.97	1559	8567.86	1559	5485.46
1560	16566.2	1560	13476.9	1560	13017.3	1560	15910.3	1560	10079	1560	11148.5	1560	7635.73	1560	4604.25
1561	16163.5	1561	15305.3	1561	13615.4	1561	15375.5	1561	13136.5	1561	14613.2	1561	7378.12	1561	5137.4
1562	19885.4	1562	15070.6	1562	13296.6	1562	15998.3	1562	13963.1	1562	14554.2	1562	7404.44	1562	5033.06
1563	16706.6	1563	12177.2	1563	13875.3	1563	17111.9	1563	13757.6	1563	10469.8	1563	7437.04	1563	4444.47
1564	14888.4	1564	9694	1564	12801.4	1564	17718.4	1564	13416.2	1564	8993.82	1564	7103.54	1564	4817.96
1565	16939.5	1565	10495.1	1565	12192.8	1565	16392.4	1565	10431.3	1565	6302.99	1565	5336.08	1565	3482.51
1566	16364.2	1566	10126.4	1566	11314.5	1566	14370.3	1566	11929.6	1566	9694.2	1566	5955.25	1566	4382.53
1567	13005	1567	8510.22	1567	10048.8	1567	13517	1567	13667.6	1567	12889.1	1567	4903.58	1567	3157.98
1568	17182	1568	13672.1	1568	9643.17	1568	14495.1	1568	15014	1568	14454.3	1568	3822.57	1568	3816.23
1569	12524.3	1569	10633	1569	10049.1	1569	14570.2	1569	14643.8	1569	13752.5	1569	4942.14	1569	5126.09
1570	9434.93	1570	9798.46	1570	9261.95	1570	13067.7	1570	14337.7	1570	14435.2	1570	3827.86	1570	4838.34
1571	6135.36	1571	7432.02	1571	8553.09	1571	12210.5	1571	14278.2	1571	13971.9	1571	4435.92	1571	5390.18
1572	9329.31	1572	11685.3	1572	7498.53	1572	10202	1572	14894.9	1572	13081	1572	5415.67	1572	7397.12
1573	7065.14	1573	7908.62	1573	11877.5	1573	13584.9	1573	14446.4	1573	13729.3	1573	7123.63	1573	7612.53
1574	6821.73	1574	6856.8	1574	11498.9	1574	13676.3	1574	11169.8	1574	10302.3	1574	6430.67	1574	7276.24
1575	7910.29	1575	7427.41	1575	10051.7	1575	11838	1575	9410.79	1575	6994.06	1575	7340.64	1575	5986.4
1576	8445.88	1576	6672.18	1576	9984.17	1576	10692.1	1576	10523.8	1576	5661.54	1576	6790.74	1576	5413.44
1577	8766.42	1577	7331.89	1577	8515.24	1577	10283.2	1577	12475.7	1577	8240.81	1577	5914.77	1577	4926.53
1578	12770	1578	11289.1	1578	9425.52	1578	9706.58	1578	11336.5	1578	11165.2	1578	5101.63	1578	4431.24
1579	12133	1579	10744.3	1579	9548.09	1579	9067.62	1579	12571.9	1579	12976.1	1579	4745.26	1579	4405.43
1580	12857.4	1580	11044.6	1580	8380.89	1580	6929.53	1580	10870.3	1580	11702.8	1580	5874.83	1580	5697.95
1581	13441.3	1581	10809.8	1581	8486.72	1581	7896.33	1581	10894.2	1581	10868.5	1581	6474.21	1581	6676.27
1582	11186.5	1582	8590.12	1582	8750.21	1582	9547.69	1582	12927.7	1582	12146.6	1582	7271.91	1582	8930.53
1583	8435.29	1583	7913.64	1583	8299.63	1583	10149.5	1583	15422.3	1583	14291.9	1583	7323	1583	9323.84
1584	6003.31	1584	5890.72	1584	7429.03	1584	11097.6	1584	15292.2	1584	15556.8	1584	7289.86	1584	7396.45
1585	8069.84	1585	7844.31	1585	7751.74	1585	12568.2	1585	16477.5	1585	15515.5	1585	7831.08	1585	6449.89
1586	6634.57	1586	6358	1586	11843.6	1586	16823.3	1586	14957.3	1586	15999.5	1586	8628.75	1586	8569.7
1587	5490.48	1587	4922.12	1587	12421.2	1587	14719.6	1587	13999.9	1587	14626.8	1587	9147.93	1587	8816.11
1588	7347.41	1588	6741.21	1588	10414.3	1588	13239.8	1588	14130.4	1588	11213.3	1588	11303.6	1588	12471.3
1589	7256.8	1589	8046.1	1589	9891.41	1589	10219.7	1589	13606.5	1589	12147.3	1589	10740.5	1589	11992.6
1590	7250.81	1590	6356.02	1590	9153.31	1590	8212.01	1590	13659.2	1590	11436.1	1590	10831.4	1590	11036.5
1591	7106.4	1591	5789.41	1591	9541.12	1591	8975.41	1591	12785	1591	11457.8	1591	10818.2	1591	10688.4
1592	9830.25	1592	9084.96	1592	10148.9	1592	11396.8	1592	11375.5	1592	9804.36	1592	10302.5	1592	10889.1
1593	9643.81	1593	9493.57	1593	8305	1593	9731.32	1593	11647	1593	11092	1593	9780.18	1593	10757.1
1594	9165.96	1594	8071.29	1594	8845.31	1594	10544.6	1594	11468.6	1594	9213.01	1594	9609.58	1594	11685.5
1595	9611.34	1595	7156.43	1595	10950	1595	12279.9	1595	12106.1	1595	9891.53	1595	9307.59	1595	13256.8
1596	10206.2	1596	7374.22	1596	11188.6	1596	10533.6	1596	12647	1596	11133.2	1596	7933.43	1596	12457.6
1597	12099.7	1597	9382.88	1597	10196.9	1597	7395.33	1597	12851.1	1597	12075.7	1597	10768.2	1597	13390
1598	13531.7	1598	11125.6	1598	11911.6	1598	6722.76	1598	11329.9	1598	11502.6	1598	9636.13	1598	12608.3
1599	13114.4	1599	10890	1599	12283.7	1599	7166.73	1599	11236	1599	12121.7	1599	10191.2	1599	13913.1
1600	13569.6	1600	11699.8	1600	11018.1	1600	7400.76	1600	10451	1600	10808.3	1600	8958.35	1600	14456
1601	11902.6	1601	12399.1	1601	10048.8	1601	10323.2	1601	8817.31	1601	10403.3	1601	7571.2	1601	13194.2
1602	11320.8	1602	11327.2	1602	11964.3	1602	10056.6	1602	9208.84	1602	12441.4	1602	5958.88	1602	10583
1603	10129.4	1603	9060.52	1603	13612.8	1603	9693.01	1603	8662.26	1603	12100.5	1603	5194.06	1603	8720.15
1604	8615.72	1604	6938.63	1604	13327.2	1604	9148.74	1604	8686.1	1604	13882.7	1604	5157.79	1604	8706.92
1605	6495.1	1605	5505.08	1605	11157.5	1605	7490.12	1605	11017.3	1605	15773.5	1605	4493.89	1605	7476.77
1606	7756.56	1606	5957.87	1606	10765.4	1606	8150.46	1606	11852.7	1606	15539.5	1606	4540.06	1606	6967.08
1607	7991.49	1607	5794.81	1607	10515.6	1607	8348.51	1607	12215.1	1607	13278.6	1607	4971.16	1607	6272.09
1608	9403.62	1608	6393.35	1608	7936.03	1608	4822.3	1608	9969.34	1608	12970	1608	4926.18	1608	5598.16
1609	8320.94	1609	5001.56	1609	8807.15	1609	7460	1609	9587.91	1609	7561.98	1609	5536.68	1609	5539.18
1610	8800.12	1610	6141.23	1610	9905.05	1610	10713.3	1610	10731.7	1610	10167.5	1610	6531.87	1610	7648.19
1611	7081.51	1611	5608.09	1611	10324.7	1611	10646.3	1611	13263.7	1611	10293.1	1611	18339.6	1611	20604.5
1612	6256.2	1612	5791.66	1612	9661.24	1612	12008.8	1612	14294.2	1612	8392.9	1612	14304.7	1612	15179.2
1613	4649.19	1613	5536.47	1613	10476.5	1613	11586.5	1613	15084	1613	8241.91	1613	15654.3	1613	15519.1
1614	4963.14	1614	5479.3	1614	9179.86	1614	11304.3	1614	19273.4	1614	12290.1	1614	15832.4	1614	16559.6
1615	5776.77	1615	5704.13	1615	10417	1615	10342.2	1615	22635.9	1615	15864.8	1615	13945.1	1615	16086.7
1616	5479.9	1616	3882.77	1616	11571.7	1616	11520.5	1616	24061.2	1616	19013.2	1616	14324.5	1616	17480.5
1617	7394.58	1617	6128.34	1617	13020.9	1617	11675.6	1617	24610.7	1617	23415.5	1617	14639.1	1617	16271.6
1618	7257.95	1618	6196.99	1618	14027.4	1618	11954.7	1618	26445.9	1618	24930.7	1618	14128.1	1618	16174.6
1619	7938.69	1619	6673.95	1619	14501.7	1619	12411.1	1619	21217.7	1619	20546.4	1619	12804.5	1619	16409.1
1620	7344.97	1620	6676.5	1620	16069.9	1620	13523.7	1620	14910.8	1620	13929.5	1620	14628.2	1620	14868.3
1621	6812.99	1621	5317.03	1621	15174	1621	11772.9	1621	11267.2	1621	9949.4	1621	13353.3	1621	15527.1
1622	7180.07	1622	5737.07	1622	15390.5	1622	11413.4	1622	6773.09	1622	5227.11	1622	12225.4	1622	14586.3
1623	7202.81	1623	7099.23	1623	15811.8	1623	11356.7	1623	6544.6	1623	4509.47	1623	14725.2	1623	13072.6
1624	5193.97	1624	3859.91	1624	15452.1	1624	11124.5	1624	7868.8	1624	4284.66	1624	13033.2	1624	13203.2
1625	6641.07	1625	6206.15	1625	15060.4	1625	13032.1	1625	10016.8	1625	6822.81	1625	12306.2	1625	12852.2
1626	9003.02	1626	5027.12	1626	15813.1	1626	13603.7	1626	12943.1	1626	8897.45	1626	13006.3	1626	12633.5
1627	12077.6	1627	7095.88	1627	16067.6	1627	14312.4	1627	11311.5	1627	7046.93	1627	11849.4	1627	11628.3
1628	11544.6	1628	6923.05	1628	15204	1628	11653.2	1628	11814	1628	10403.4	1628	11103.6	1628	11865.5
1629	10225.4	1629	6397.11	1629	15266.4	1629	11824.4	1629	11256.6	1629	9911.58	1629	9537.69	1629	10745.3
1630	8516.25	1630	6235.05	1630	11960.4	1630	8918.7	1630	11253.6	1630	10531.8	1630	9903.93	1630	11372.9
1631	6537.16	1631	4789.36	1631	11075.6	1631	11070.7	1631	9524.92	1631	12024	1631	9407.23	1631	11136.4
1632	5029.68	1632	3341.7	1632	11478.5	1632	10763.9	1632	7241.72	1632	11286.8	1632	8887.72	1632	10461.1
1633	4669.69	1633	2475.55	1633	9965.62	1633	9516.34	1633	5778.45	1633	8699.09	1633	8849.85	1633	10047.4
1634	4801.66	1634	2746.58	1634	10105.9	1634	8810.55	1634	5557.41	1634	6986.04	1634	8515.78	1634	10364
1635	5502.75	1635	2977.9	1635	9922.51	1635	8804.57	1635	3897	1635	6981.6	1635	9694.39	1635	13241.9
1636	9448.25	1636	5796.12	1636	9684.59	1636	9047.11	1636	3587.58	1636	5775.95	1636	9365.26	1636	13729.6
1637	7964.12	1637	5960.74	1637	10961	1637	9027.41	1637	2493.27	1637	3763.25	1637	7769.15	1637	12459
1638	8612.83	1638	6919.2	1638	10969.6	1638	9708.76	1638	2412.12	1638	3655.24	1638	6259.97	1638	10597.4
1639	6429.12	1639	5753.73	1639	9999.63	1639	8786.99	1639	2348.26	1639	2280.17	1639	4153.46	1639	7541.07
1640	5951.79	1640	5606.48	1640	8590.16	1640	8687.44	1640	3880.3	1640	2847.65	1640	5329.5	1640	9232.02
1641	5424.2	1641	5464.18	1641	7461.61	1641	6364.81	1641	4817.24	1641	3500.99	1641	5988.22	1641	9842.89
1642	4138.2	1642	4024.49	1642	7549.45	1642	6762.79	1642	7633.89	1642	4900.68	1642	4702.03	1642	7557.08
1643	4065.16	1643	4025.64	1643	8279.34	1643	7603.52	1643	10379.6	1643	8855.9	1643	6547.11	1643	8653.46
1644	4571.57	1644	3331.19	1644	7063.9	1644	7199.14	1644	10396.9	1644	9203.82	1644	8777.06	1644	11460.1
1645	5853.32	1645	3552.94	1645	7682.61	1645	8757.2	1645	7974.38	1645	7247.6	1645	7533.26	1645	10075.6
1646	6219.16	1646	4979.88	1646	9647.2	1646	9922.84	1646	8053.48	1646	8719.76	1646	6679.85	1646	9383.14
1647	4690.34	1647	3979.71	1647	9122.42	1647	10733.1	1647	7150.67	1647	8845	1647	6436.95	1647	9482.16
1648	5706.03	1648	5734.56	1648	11369	1648	11566	1648	6459.41	1648	8765.55	1648	9162.03	1648	11962.7
1649	4450.07	1649	4328.87	1649	13036.7	1649	12695.8	1649	6082.75	1649	7890.77	1649	8108.33	1649	10543
1650	4527.82	1650	3767.77	1650	16692	1650	13378.5	1650	6714.46	1650	8860.37	1650	6569.78	1650	9350.71
1651	4270.69	1651	3495.27	1651	15852.7	1651	10598.7	1651	6839.02	1651	7149.06	1651	8437.33	1651	11711.4
1652	3961.2	1652	2710.02	1652	15472.3	1652	10297.2	1652	7590.24	1652	6466.92	1652	8670.35	1652	10889.1
1653	4293.02	1653	2332.36	1653	13314.1	1653	14087.9	1653	8442.39	1653	7588.94	1653	7735.59	1653	10116.1
1654	5288.53	1654	2238.37	1654	13566.8	1654	15888	1654	9654.58	1654	8418.6	1654	8988.04	1654	10295.3
1655	7129.76	1655	3506.28	1655	14904.7	1655	17093.8	1655	12243.8	1655	8623.38	1655	10673.2	1655	11071.9
1656	10094.5	1656	5433.91	1656	16327.3	1656	15674.1	1656	10956	1656	10322.6	1656	9243.52	1656	10374.3
1657	11525.6	1657	7695.9	1657	16780.5	1657	16480.4	1657	12498.5	1657	12653.8	1657	7978.66	1657	9642.86
1658	11211.8	1658	8529.17	1658	18673.8	1658	16696.4	1658	17799.1	1658	16306.7	1658	6902.54	1658	9220.61
1659	9217.98	1659	7769.76	1659	20457.3	1659	19642.9	1659	17243.8	1659	14922.1	1659	5775.51	1659	7857.02
1660	7696.06	1660	6823.26	1660	23537	1660	22520.9	1660	20135.8	1660	17212.3	1660	8221.76	1660	9907.8
1661	5792.18	1661	5707.8	1661	25439.9	1661	22788.9	1661	19980.6	1661	18464	1661	7076.76	1661	9757.44
1662	5310.22	1662	4801.34	1662	25865.8	1662	18334	1662	19476.5	1662	18987.9	1662	5816.25	1662	8756.07
1663	5047.03	1663	3839.54	1663	22456	1663	15580.7	1663	23325.8	1663	23231.7	1663	4776.09	1663	7770.11
1664	4920.25	1664	4633.61	1664	22985.2	1664	13973.8	1664	20461.5	1664	20910.5	1664	3817.74	1664	7263.04
1665	4078.86	1665	5312.02	1665	18698.2	1665	16426.3	1665	19897.8	1665	17229.2	1665	6825.81	1665	9565.53
1666	3228.34	1666	3708.47	1666	17447.9	1666	13781.8	1666	20179.3	1666	15696.1	1666	5296.57	1666	7468.36
1667	2160.24	1667	1951.44	1667	17835.8	1667	15182.6	1667	18784.3	1667	13750.7	1667	3986.44	1667	6105.59
1668	2371.92	1668	2046.59	1668	16880.7	1668	11718	1668	19066.1	1668	13627.6	1668	3513.47	1668	5460.46
1669	3069.34	1669	2088.96	1669	19000	1669	14282.1	1669	21219.7	1669	15031.6	1669	3356.44	1669	5576.61
1670	3743.05	1670	1446.97	1670	16592.2	1670	13369.6	1670	14817.1	1670	11407	1670	6217.55	1670	8874.01
1671	5502.04	1671	4340.89	1671	19402.6	1671	15663.4	1671	13790.8	1671	11292.7	1671	4647.13	1671	7527.58
1672	6508.3	1672	3978.05	1672	16634.2	1672	12799.9	1672	16221.2	1672	13421.3	1672	4186.91	1672	6384.77
1673	7326.37	1673	5780.96	1673	18010.9	1673	12164.5	1673	18609.8	1673	16854.9	1673	4695.52	1673	6283.06
1674	6908.64	1674	6531.98	1674	22609.2	1674	13807.9	1674	20879.3	1674	20048.7	1674	6883.64	1674	8771.89
1675	6948.74	1675	7922.45	1675	22152	1675	16277.7	1675	23319.3	1675	22066.7	1675	5630.66	1675	7348.15
1676	5839.21	1676	7888.35	1676	22694.8	1676	17440.1	1676	21721.2	1676	20961.8	1676	7375.43	1676	8725.23
1677	7428.45	1677	9354.84	1677	20287.9	1677	18848.1	1677	19969.2	1677	18378.6	1677	7943.89	1677	7736.81
1678	5820.25	1678	8235.29	1678	17398.8	1678	15430.2	1678	17886.9	1678	14308.2	1678	7658.71	1678	7493.54
1679	6951.01	1679	7112.7	1679	16497.5	1679	14593.7	1679	18493.1	1679	14163.5	1679	8227.78	1679	8518.19
1680	8632.85	1680	7583.31	1680	14521	1680	12730.8	1680	18019.5	1680	13892.2	1680	8965.8	1680	8333.56
1681	8909.59	1681	7230.17	1681	13971.1	1681	13854.9	1681	16223	1681	12604.7	1681	9713.93	1681	7879.36
1682	11583	1682	9190.71	1682	14165.9	1682	13082.4	1682	19474.6	1682	14682.3	1682	10226.2	1682	7706.3
1683	11513	1683	9103.07	1683	14464.1	1683	12937.8	1683	18009.1	1683	14933	1683	11129.4	1683	7658.82
1684	11468.1	1684	10302.4	1684	14131.6	1684	15651.1	1684	17650.7	1684	13203.2	1684	11407.7	1684	8109.13
1685	12675	1685	12593.9	1685	13860.8	1685	13934.8	1685	14620.3	1685	12252.7	1685	10469	1685	7728.2
1686	15102.3	1686	15226.3	1686	13941.9	1686	15392.9	1686	12946.7	1686	11657.9	1686	10079.2	1686	8086.99
1687	14462.9	1687	15007.2	1687	12773.4	1687	15028.5	1687	10708.5	1687	10703.3	1687	9388.35	1687	8287.81
1688	10241.3	1688	10059.6	1688	10325.1	1688	12359.5	1688	13661.3	1688	13156.8	1688	9227.46	1688	8837.5
1689	9362.98	1689	8480.83	1689	10227.4	1689	11468.5	1689	15616.5	1689	14982.9	1689	9122.65	1689	9773.28
1690	7722.75	1690	6820.84	1690	10318.6	1690	11851.6	1690	15365.4	1690	15098.3	1690	10035.9	1690	10824.1
1691	7060.67	1691	5688	1691	9914.04	1691	11670.9	1691	17237.1	1691	15374.6	1691	10905.6	1691	10885
1692	6528.46	1692	5673.8	1692	8461.25	1692	10460.4	1692	17711.6	1692	15002.3	1692	11247.1	1692	10803.3
1693	5895.81	1693	4927.61	1693	8400.97	1693	10898.3	1693	20110.2	1693	15162.1	1693	11534.2	1693	10995.5
1694	5358.95	1694	4602.52	1694	7728.59	1694	10564.3	1694	25048.6	1694	17591.9	1694	11146.5	1694	10711.7
1695	9720.37	1695	6968.02	1695	7910.2	1695	8765.56	1695	27854.3	1695	19606.5	1695	11341.9	1695	11015.1
1696	7027.77	1696	5812.3	1696	8727.34	1696	8761.98	1696	25225.7	1696	20030.5	1696	11966.4	1696	10811.5
1697	6771.56	1697	6238.26	1697	8373.22	1697	9590.3	1697	24203	1697	20222.6	1697	12076.2	1697	11436.4
1698	5488.93	1698	5601.03	1698	10365.2	1698	9385.48	1698	25056.5	1698	17876.1	1698	11006.5	1698	11671.5
1699	5929.4	1699	4759.65	1699	9452.53	1699	9784.21	1699	26610.5	1699	20388	1699	10034.8	1699	10603.2
1700	8440.31	1700	7858.58	1700	10560.7	1700	10958.7	1700	28203.5	1700	20092.5	1700	9999.85	1700	10673
1701	8722.6	1701	8326.57	1701	9705.09	1701	11391.7	1701	25968.4	1701	19718.3	1701	9393.09	1701	10940.7
1702	10029.9	1702	9652.76	1702	12398.2	1702	13126.1	1702	25028.9	1702	20598.1	1702	10445.9	1702	11999.3
1703	10914.3	1703	9576.27	1703	11653.6	1703	14640.1	1703	21065.2	1703	17583.9	1703	9484.84	1703	10597.1
1704	10986.7	1704	8779.57	1704	12102.9	1704	13627.2	1704	17786.4	1704	14906.9	1704	9304.27	1704	6057.17
1705	10820	1705	8415.51	1705	12451.9	1705	13555.2	1705	21513.4	1705	15858.9	1705	9944.01	1705	8565.89
1706	10858.3	1706	8876.23	1706	12310.6	1706	13923	1706	19391.5	1706	14235.3	1706	10835.6	1706	8434.17
1707	12016.3	1707	8069.82	1707	13109.1	1707	12496.5	1707	19374.9	1707	13367.5	1707	10666.6	1707	10005.4
1708	11469.6	1708	8286.42	1708	12363.5	1708	12604.3	1708	20153.3	1708	12736.9	1708	10257.2	1708	9538.74
1709	11047.6	1709	8846.01	1709	10883.5	1709	11324.7	1709	21609.9	1709	13626.3	1709	10076.6	1709	10021.8
1710	10125.7	1710	8327.06	1710	13808.4	1710	12944.6	1710	22448.8	1710	15159.6	1710	9177.39	1710	10056.3
1711	8911.23	1711	8213.02	1711	11316.8	1711	10603.9	1711	21789.2	1711	17077.4	1711	7608.42	1711	8439.33
1712	8826.14	1712	9950.86	1712	13760	1712	16068	1712	23678.4	1712	19289.9	1712	8185.98	1712	8752.6
1713	13906.3	1713	15215.2	1713	10681.8	1713	11547.8	1713	20741.2	1713	14952.2	1713	6943.1	1713	8159.33
1714	16036	1714	17773.8	1714	10429	1714	12548.6	1714	18196.2	1714	13067.5	1714	5855.57	1714	8406.38
1715	17577	1715	13253.5	1715	7664.7	1715	10306.5	1715	16446.5	1715	13736.4	1715	5643.19	1715	9148.19
1716	19080.8	1716	11571.1	1716	7618.87	1716	7468.92	1716	16348	1716	11519.6	1716	4568.45	1716	6936.73
1717	18038	1717	14272.8	1717	7922.44	1717	9131.28	1717	16377.7	1717	11974.7	1717	5216.98	1717	7702.54
1718	20194.4	1718	17707.3	1718	7861.52	1718	8450.3	1718	16766.8	1718	13432.7	1718	4875.12	1718	8336.48
1719	19620.7	1719	18992.3	1719	9788.45	1719	8968.19	1719	16438	1719	13876.1	1719	3244.59	1719	7145.69
1720	20601	1720	17088.4	1720	11926.7	1720	11474.3	1720	14698	1720	12298.2	1720	2073.14	1720	4891.78
1721	21537.7	1721	15639.4	1721	12652	1721	10537.9	1721	14253.6	1721	11230.9	1721	1295.2	1721	3302.1
1722	21520	1722	16068.4	1722	10801.8	1722	10009.3	1722	14862.5	1722	11515.7	1722	2180.06	1722	4322.96
1723	20023	1723	17667.2	1723	10603.8	1723	9493.75	1723	15953.6	1723	12409.6	1723	1763.7	1723	3425.26
1724	15908.2	1724	12690.1	1724	10173.2	1724	8416.59	1724	17961	1724	14256.4	1724	1501.69	1724	3095.52
1725	17482.1	1725	15401.5	1725	10759.5	1725	9427.89	1725	18222.7	1725	14160.4	1725	952.242	1725	2102.72
1726	18103.5	1726	14368.9	1726	11773	1726	12667	1726	20180.7	1726	17360.9	1726	752.982	1726	1514.24
1727	15219.8	1727	11259.1	1727	12998.4	1727	14436.4	1727	20782.6	1727	19003.5	1727	1207.27	1727	2806.34
1728	18341.5	1728	14035.5	1728	12025.4	1728	13816.3	1728	21882.8	1728	18150.5	1728	927.27	1728	2696.27
1729	18181.3	1729	13342.2	1729	9461.27	1729	12083.2	1729	23128.9	1729	18408.2	1729	591.336	1729	2957.14
1730	16108.4	1730	10085.5	1730	7381.2	1730	7415.34	1730	23800.5	1730	19170.9	1730	1545.39	1730	3358.27
1731	17485.3	1731	12548	1731	7514.77	1731	6908.73	1731	22066.9	1731	19177.6	1731	1405.96	1731	3243.29
1732	18926	1732	14450.4	1732	8782.41	1732	11303.3	1732	20443.1	1732	17601	1732	3288.31	1732	4416.17
1733	16148	1733	13573	1733	7165.46	1733	10793	1733	19490.9	1733	15751.8	1733	3768.9	1733	3911.43
1734	16417.9	1734	13234.1	1734	7025.05	1734	9459.1	1734	17732	1734	14864.1	1734	4063.44	1734	4161.63
1735	17360.6	1735	14001.7	1735	6394.56	1735	8695.21	1735	17903.3	1735	14791.4	1735	4909.55	1735	4157.07
1736	17505.9	1736	16052.5	1736	7211.97	1736	8815.39	1736	15950.2	1736	10579.2	1736	4710.07	1736	4471.78
1737	17129.5	1737	16179.7	1737	7164.97	1737	8500.86	1737	13023.9	1737	9997.64	1737	4866.74	1737	4926.7
1738	15861	1738	15555.6	1738	6357.26	1738	9722.82	1738	12097	1738	10706.2	1738	5052.61	1738	6324.21
1739	11163.1	1739	8296.86	1739	7757.07	1739	10617.2	1739	11697.7	1739	10100.5	1739	5018	1739	8674.2
1740	9274.03	1740	6545.66	1740	7673.54	1740	10954.9	1740	10804	1740	9221.8	1740	4295.25	1740	8194.25
1741	10501.7	1741	8383.85	1741	8452.02	1741	9850.49	1741	10992.4	1741	10695.8	1741	4385.95	1741	6444.94
1742	9870.5	1742	6434.64	1742	9514.6	1742	9959.36	1742	10746	1742	10791.4	1742	3451.21	1742	6859.25
1743	6360.28	1743	5649.64	1743	10698.2	1743	9348.76	1743	10902.3	1743	8570.35	1743	4477.69	1743	3831.85
1744	3861.81	1744	4309.51	1744	9547.42	1744	8396.88	1744	11365.8	1744	9822.95	1744	4308.71	1744	4124.05
1745	6525.98	1745	4831.77	1745	7289.25	1745	5884.57	1745	12467.4	1745	13677	1745	5497.95	1745	5259.98
1746	4700.03	1746	1984.07	1746	8682.35	1746	8079.72	1746	12154.7	1746	11750.5	1746	4923.48	1746	5505.1
1747	8638.98	1747	4569.95	1747	9328.17	1747	9056	1747	13625.3	1747	14961.5	1747	4123.32	1747	4499.12
1748	9523.66	1748	4717.8	1748	10537.2	1748	11694.1	1748	20729.9	1748	21277.6	1748	4230.2	1748	3600.75
1749	11304	1749	5731.77	1749	10961.7	1749	12035.7	1749	20554.7	1749	22292.8	1749	4421.8	1749	4200.98
1750	13208.3	1750	8278.81	1750	11705.2	1750	12971.7	1750	15842.2	1750	15875	1750	5512.99	1750	5114.94
1751	14781.3	1751	8581.05	1751	11789.8	1751	13110.3	1751	14818.9	1751	14692	1751	5818.94	1751	5982.32
1752	13748.6	1752	7315.69	1752	13351.4	1752	14358.9	1752	13207.7	1752	13423.3	1752	4988.15	1752	7701.88
1753	17582.1	1753	9354.07	1753	13211.8	1753	10141	1753	10885.1	1753	10901.6	1753	5127.9	1753	6010.21
1754	17262.2	1754	11392.6	1754	10943.4	1754	7827.65	1754	12509.8	1754	13250.2	1754	4320.55	1754	6159.3
1755	13935.1	1755	12084.8	1755	11773.2	1755	11371.2	1755	16163.2	1755	15823.1	1755	5749.01	1755	6534.64
1756	13128.8	1756	12191.6	1756	12280.2	1756	12900.6	1756	18756.5	1756	17865.5	1756	5905.3	1756	8099.48
1757	13166.6	1757	13411.7	1757	12350.3	1757	14858.9	1757	21438.9	1757	21442.3	1757	7678.71	1757	9576.74
1758	13510.6	1758	14363.5	1758	8090.24	1758	11810.7	1758	24576	1758	26325.8	1758	7745.89	1758	10148.5
1759	14944.2	1759	13353.3	1759	5365.78	1759	7246.54	1759	25140.9	1759	26323.2	1759	7526.82	1759	11186
1760	16594.9	1760	13991.7	1760	6620.33	1760	8530.17	1760	25138.2	1760	27237.1	1760	7703.45	1760	10390.1
1761	17294.6	1761	12993.7	1761	5280.09	1761	3493.5	1761	23604.2	1761	23994.4	1761	8723.93	1761	10557.2
1762	17202.3	1762	12454.3	1762	6363.11	1762	2388.5	1762	19788.4	1762	19793.6	1762	9172.45	1762	11615
1763	20024.2	1763	12599.1	1763	8403.95	1763	3383.02	1763	14673.5	1763	16067.2	1763	11502.1	1763	14945.6
1764	19849.9	1764	13048.2	1764	7939.32	1764	3971.63	1764	11777.5	1764	14133.1	1764	9733.51	1764	14958.8
1765	18740.4	1765	10150.8	1765	7848.7	1765	2294.8	1765	10244.7	1765	11392.5	1765	10699.7	1765	15218.6
1766	22141.7	1766	14303.8	1766	9682.36	1766	4791.49	1766	14934.6	1766	14111.8	1766	11172.4	1766	15145.3
1767	21929.4	1767	13705	1767	12436.5	1767	7413.26	1767	11478.5	1767	10952.4	1767	9896.21	1767	12609.6
1768	22650.8	1768	13474.9	1768	11277.9	1768	10249	1768	10156.5	1768	9985.21	1768	9821.2	1768	10312
1769	19717.7	1769	11370.6	1769	8369.54	1769	12357.7	1769	10808.1	1769	9502.62	1769	9506.55	1769	8240.82
1770	22986.8	1770	15083.9	1770	7066.78	1770	7839.88	1770	10899.4	1770	10182.8	1770	8806.08	1770	7361.85
1771	20573.5	1771	13665.2	1771	6997.36	1771	8098.29	1771	10719.8	1771	7693.72	1771	10143.9	1771	7261.43
1772	17460.8	1772	12317.6	1772	4762.29	1772	8444.9	1772	11439	1772	8428.56	1772	9454.12	1772	5984.15
1773	14448.6	1773	7939.82	1773	3704.46	1773	8475.72	1773	11204.4	1773	8557.92	1773	12335.4	1773	10170.1
1774	12169.3	1774	6695.44	1774	3351.11	1774	8006.72	1774	9202.44	1774	7309.04	1774	14441.2	1774	14543.4
1775	9401.48	1775	6253.27	1775	3814.81	1775	6367.16	1775	7937.89	1775	5400.05	1775	12673.5	1775	11012.7
1776	8845.34	1776	4671.69	1776	4078.11	1776	5730.69	1776	8920.13	1776	7730.51	1776	10769.7	1776	9335.96
1777	6699.66	1777	3916.82	1777	4415.72	1777	6860.28	1777	11712.6	1777	9806.17	1777	8609.28	1777	6724.01
1778	6049.06	1778	3149.28	1778	3670.72	1778	6131.94	1778	11208	1778	9229.26	1778	7306.02	1778	4776.06
1779	4901.4	1779	3505.78	1779	4083.04	1779	7181.3	1779	12180	1779	10525	1779	6063.35	1779	3208.8
1780	4404.82	1780	2630.08	1780	3752.77	1780	5142.52	1780	13126.5	1780	10901.9	1780	5079.14	1780	2335.98
1781	6101.91	1781	4068.16	1781	3923.66	1781	6497.05	1781	13301.2	1781	10890.8	1781	3858.86	1781	1995.27
1782	4947.04	1782	4638.02	1782	5492.42	1782	8485.35	1782	13107.4	1782	12136	1782	3251.82	1782	1740.84
1783	6426.96	1783	6777.2	1783	5391.38	1783	8923.31	1783	12310.7	1783	11342.1	1783	4865.42	1783	2077.04
1784	6593.86	1784	6479.34	1784	5731.79	1784	8828.33	1784	12721.9	1784	11442.4	1784	6803.29	1784	4063.37
1785	8901.71	1785	6239.84	1785	3956.51	1785	5182.04	1785	10715.9	1785	10369.2	1785	5140.14	1785	3612.2
1786	8317.51	1786	5333.69	1786	4708.98	1786	8176.58	1786	11427.5	1786	10748.1	1786	8844.12	1786	6282.86
1787	9314.9	1787	6209.13	1787	4318.67	1787	5594.54	1787	6721.61	1787	6709.05	1787	7713.61	1787	7202.39
1788	9289.51	1788	6477.83	1788	4639.09	1788	2634.52	1788	6285.21	1788	6562.85	1788	10275.6	1788	10368.2
1789	11317.6	1789	9015.65	1789	3292.22	1789	2921.45	1789	7987.96	1789	9134.71	1789	9138.63	1789	10316.4
1790	12034.8	1790	10046	1790	3002.61	1790	2693.5	1790	9348.2	1790	8776.57	1790	11534.4	1790	11937.6
1791	12788.7	1791	11427.1	1791	6271.96	1791	4615.71	1791	9054.43	1791	8594.45	1791	12647.1	1791	13654.4
1792	11993.9	1792	10076.3	1792	5882.38	1792	5738.15	1792	9084.13	1792	8138.64	1792	11809.5	1792	11606
1793	12176.8	1793	10610.7	1793	7205.77	1793	6047.11	1793	7713.7	1793	7112.22	1793	10944.1	1793	9427.83
1794	13536	1794	10779.2	1794	8857.39	1794	12685.2	1794	7921.95	1794	6821.9	1794	10154.2	1794	11556.2
1795	13382.3	1795	11667.2	1795	8656.03	1795	11048	1795	7627.04	1795	6481.32	1795	9084.94	1795	8196.5
1796	11810.9	1796	10726.5	1796	8680.49	1796	10283.6	1796	10271.4	1796	9513.98	1796	8606.65	1796	7889.03
1797	11735.5	1797	9170.24	1797	5731.72	1797	6975.91	1797	10522.4	1797	9875.86	1797	7725.44	1797	6535.62
1798	13878	1798	10827.2	1798	8068.76	1798	8543.21	1798	9087.05	1798	8576.67	1798	6683.17	1798	6434.29
1799	14007	1799	10900.4	1799	8316	1799	6514.77	1799	8464.96	1799	8298.03	1799	7038.59	1799	6620.66
1800	17123.4	1800	12505	1800	8113.79	1800	7373.81	1800	8742.96	1800	8817.4	1800	7153.52	1800	6963.74
1801	17674.5	1801	14009.8	1801	8442.3	1801	6415.76	1801	9065.61	1801	9076.49	1801	8111.1	1801	7435.14
1802	16038.3	1802	14313.7	1802	7224.3	1802	7245.35	1802	9655.76	1802	10114.4	1802	10644.8	1802	9037.55
1803	18785	1803	16912.5	1803	7765.56	1803	13591	1803	9130.65	1803	11190.5	1803	10129.2	1803	8788.25
1804	20184.7	1804	19535	1804	8506.16	1804	12261.5	1804	7526.03	1804	10389.8	1804	10054.1	1804	7362.57
1805	18070.9	1805	17117.4	1805	5351.65	1805	9499.81	1805	11149.1	1805	10058.3	1805	9514.15	1805	6453.26
1806	14873.2	1806	12696.9	1806	4364.42	1806	4444.34	1806	11187.5	1806	10792.4	1806	9639.69	1806	7015.73
1807	12032.2	1807	11603.2	1807	4489.97	1807	4246.08	1807	10586.1	1807	10705.4	1807	9156.37	1807	5789.84
1808	9873.54	1808	9180.19	1808	5064.8	1808	4468.01	1808	14883.4	1808	16115.7	1808	7281.74	1808	3863.64
1809	9254.93	1809	9834.11	1809	4495.52	1809	5420.15	1809	16150.4	1809	17274.8	1809	4453.3	1809	2965.31
1810	9155.4	1810	9454.36	1810	5649.59	1810	4146.69	1810	18437.4	1810	18417.8	1810	7613.11	1810	4827.35
1811	10086.7	1811	11237.3	1811	8869.45	1811	9279.92	1811	20752	1811	20911.2	1811	6298.66	1811	5539.13
1812	9905.39	1812	10113	1812	8116.61	1812	10390	1812	24061.4	1812	20457.1	1812	7016.45	1812	6849.74
1813	10309.2	1813	9725.53	1813	7949.36	1813	8882.39	1813	24106.1	1813	22689.3	1813	11434.8	1813	10801.2
1814	11314.7	1814	9374.27	1814	5805.9	1814	7484.06	1814	25032.1	1814	19459.7	1814	14216.7	1814	14329.3
1815	14458.2	1815	11428.9	1815	5094.99	1815	7427.24	1815	23207.2	1815	17893.5	1815	14522.6	1815	14820
1816	16869.7	1816	12833.9	1816	4642.98	1816	9201.44	1816	21632.6	1816	14926.9	1816	17222.8	1816	19698.3
1817	15892.2	1817	11742.4	1817	4727.04	1817	9325.11	1817	23515.6	1817	16971.1	1817	16629.2	1817	17330.1
1818	14245.7	1818	11058.6	1818	6708.32	1818	10047.6	1818	23862.3	1818	15491.1	1818	12698.2	1818	12240.2
1819	13001.3	1819	10870.5	1819	6521.01	1819	11097.3	1819	22855	1819	14871.5	1819	9550.64	1819	8708.25
1820	12353.3	1820	11860.8	1820	7298.44	1820	11803.1	1820	23885.9	1820	16202.4	1820	6281.08	1820	3310.26
1821	11934.6	1821	12392.1	1821	7794.09	1821	11385.6	1821	23434.1	1821	19110.8	1821	6401.7	1821	2771.8
1822	12266.1	1822	12584.6	1822	8084.94	1822	11654.5	1822	22729.3	1822	19635.1	1822	8191.25	1822	6369.26
1823	13293.8	1823	12840.9	1823	7422	1823	12056	1823	23863.6	1823	20643.5	1823	7352.42	1823	5556.74
1824	14855.8	1824	12419.6	1824	8190.7	1824	13272.5	1824	24776.1	1824	19448.4	1824	8836.04	1824	8092.95
1825	16619	1825	12004.8	1825	7690.35	1825	13059.3	1825	25555.6	1825	18318.1	1825	13455.1	1825	14005.2
1826	16071.6	1826	11471.5	1826	7595.37	1826	12587.3	1826	27156	1826	19929.9	1826	17818.3	1826	19038.1
1827	15060.7	1827	11593.8	1827	6915.38	1827	12868.9	1827	28271.5	1827	20717.4	1827	15324.5	1827	15460
1828	15567.5	1828	11604.3	1828	5842.67	1828	11232.7	1828	26559.1	1828	19849.1	1828	14080.5	1828	11929.5
1829	16132.3	1829	11702.6	1829	5343.99	1829	10346.8	1829	21332.6	1829	17444.4	1829	13042.3	1829	9934.21
1830	16372	1830	11667.2	1830	5764.18	1830	10036.8	1830	16088.2	1830	15181.8	1830	11319.7	1830	7125.09
1831	15805	1831	11602.8	1831	5446.14	1831	8604.15	1831	16769.3	1831	14948.5	1831	8983.8	1831	4809.85
1832	16891.9	1832	13698.5	1832	7295.41	1832	9466.93	1832	15479.4	1832	15429.8	1832	7517.16	1832	3769.72
1833	16924.1	1833	14697.8	1833	5832.75	1833	7088.31	1833	13558.5	1833	15184.7	1833	6262.86	1833	3950.18
1834	16599.5	1834	13368.8	1834	5753.79	1834	8660.08	1834	12577.1	1834	15591.1	1834	6062.01	1834	4765.36
1835	15842.5	1835	12946.1	1835	7022.13	1835	9579.98	1835	12838.6	1835	14124.4	1835	6441.23	1835	4512.86
1836	11992.8	1836	9050.51	1836	7006.53	1836	9445.65	1836	11297.8	1836	13889.1	1836	6329.36	1836	3423.57
1837	14832.4	1837	12359.1	1837	6656.07	1837	8626.78	1837	11114.9	1837	13104.1	1837	4717.08	1837	2093.07
1838	14648.3	1838	12504.8	1838	6135.62	1838	8272.25	1838	12422.1	1838	13640.4	1838	7445.08	1838	4665.3
1839	12441.8	1839	10641	1839	6012.05	1839	9358.39	1839	12483.6	1839	14063.9	1839	5762.44	1839	3930.62
1840	14039.1	1840	11331.3	1840	5544.33	1840	7074.2	1840	14209.8	1840	15796.3	1840	4376.23	1840	3752.38
1841	14987.8	1841	12421	1841	4809.31	1841	8104.5	1841	14814.1	1841	15712.7	1841	3936.68	1841	4290.66
1842	16599.6	1842	14183.7	1842	4420.95	1842	8526.16	1842	13018.4	1842	12735	1842	4884.81	1842	4639.17
1843	16343.5	1843	15135.8	1843	4294.52	1843	8079.92	1843	12068.2	1843	10630.2	1843	5389.48	1843	5616.33
1844	14544.6	1844	14462.3	1844	4999.14	1844	7685.82	1844	12443.1	1844	10922.3	1844	5005.38	1844	4860.1
1845	11740.1	1845	11247.1	1845	5077.76	1845	7750.73	1845	12514.9	1845	10351.7	1845	5189.1	1845	4114.98
1846	12432.1	1846	11268.3	1846	6224.46	1846	7873.99	1846	11675.5	1846	7832.48	1846	4946.44	1846	3786.06
1847	12419.9	1847	10103.5	1847	5960.39	1847	6160.06	1847	11682.4	1847	9326.3	1847	6572.98	1847	5613.87
1848	12315.6	1848	10198.1	1848	5941.36	1848	7596.14	1848	9999	1848	7949.38	1848	7168.9	1848	6459.21
1849	11352.3	1849	8973.03	1849	4526.69	1849	6120.47	1849	9393.76	1849	7409.55	1849	9063.69	1849	7128.4
1850	12277.6	1850	11155.8	1850	3892.81	1850	6988.71	1850	10105.6	1850	8683.05	1850	8389.52	1850	7081.45
1851	11888.1	1851	10219.5	1851	3108.81	1851	6079.01	1851	9827.39	1851	8796.29	1851	8978.15	1851	9220.57
1852	10374.4	1852	10410.8	1852	3994.08	1852	7231.01	1852	9234.58	1852	8438.51	1852	7534.26	1852	7954.83
1853	8602.1	1853	8362.9	1853	4293.18	1853	7838.43	1853	13312.2	1853	11402	1853	5938.12	1853	9528.46
1854	7928.5	1854	7935.43	1854	4151.5	1854	7320.23	1854	13587.3	1854	12586.4	1854	6727.2	1854	8856.34
1855	6854.18	1855	7023.93	1855	4347.06	1855	6319.81	1855	13133.7	1855	11534.2	1855	8087.29	1855	8783.06
1856	6483.42	1856	7071.26	1856	4334.38	1856	5833.27	1856	15184.5	1856	14328.4	1856	8248.46	1856	8383.15
1857	5887.35	1857	5324.27	1857	4045.27	1857	5377.48	1857	15389.1	1857	12785.8	1857	9044.52	1857	7832.71
1858	6187.15	1858	4760.34	1858	6099.89	1858	8020.52	1858	10920.9	1858	10789	1858	8078.13	1858	6148.47
1859	7000.82	1859	4532	1859	5168.37	1859	7972.43	1859	11610.3	1859	11400.6	1859	6265.51	1859	4986.75
1860	8380.03	1860	5186.76	1860	4929.15	1860	9768.41	1860	14705.1	1860	16338.3	1860	5247.36	1860	4571.64
1861	10264.6	1861	8299.16	1861	7340.11	1861	14014.3	1861	12390.3	1861	13895.1	1861	4187.27	1861	3206.16
1862	11838.3	1862	10360.4	1862	8277.17	1862	14765.8	1862	15547.4	1862	15729.7	1862	5285.66	1862	4901.03
1863	11259.1	1863	9120.14	1863	8012	1863	14242	1863	14188.2	1863	13363.4	1863	7718.38	1863	8039.66
1864	11725.1	1864	9824.47	1864	6909.48	1864	10275.6	1864	12628.5	1864	10098.8	1864	7960.99	1864	7177.92
1865	11615.7	1865	10403.4	1865	6853.35	1865	9356.84	1865	10849.8	1865	7712.52	1865	7114.75	1865	4963.57
1866	12076.5	1866	11474.7	1866	6682.69	1866	8476.79	1866	12690.7	1866	8053.34	1866	5429.05	1866	4088.69
1867	11442.1	1867	12586.3	1867	6705.28	1867	9014.81	1867	10349.4	1867	7103.47	1867	3894.35	1867	4375.66
1868	10763.1	1868	10238.5	1868	7966.87	1868	11545.1	1868	9737.82	1868	5946.65	1868	4128.94	1868	4825.81
1869	10989.3	1869	8737.98	1869	8368.51	1869	13109.3	1869	10825.3	1869	5183.69	1869	5158.71	1869	6202.97
1870	10922.9	1870	7759.41	1870	7505.63	1870	13334.1	1870	10094.5	1870	4998.03	1870	6334.5	1870	7632.29
1871	8545.97	1871	6886.42	1871	6772.48	1871	11748.4	1871	10394.9	1871	5930.18	1871	7008.84	1871	8498.29
1872	7331.23	1872	5274.98	1872	6483.27	1872	11962.2	1872	11520.4	1872	6604.42	1872	7487.74	1872	7684.51
1873	5215.7	1873	2914.94	1873	5543.48	1873	10695.7	1873	11689.3	1873	6074.52	1873	7948.19	1873	9155.38
1874	5641.84	1874	2443.03	1874	5188.77	1874	10119.9	1874	11153.5	1874	6059.69	1874	9612.56	1874	11956.9
1875	4941.4	1875	1373.12	1875	4222.32	1875	9525.72	1875	10654.4	1875	5690.94	1875	10598.8	1875	14765.2
1876	5225.83	1876	2200.86	1876	4478.58	1876	8318.09	1876	12273.2	1876	8111.68	1876	14107.6	1876	15835.3
1877	6168.3	1877	4020.99	1877	4004.44	1877	5818.51	1877	11485.5	1877	8052.37	1877	14604.8	1877	15060.7
1878	6559.42	1878	5653.41	1878	8474.42	1878	17109.7	1878	16967.2	1878	13004.6	1878	14587.2	1878	16015.6
1879	7300.85	1879	5725.74	1879	6647.46	1879	12140.8	1879	14816.2	1879	11128.3	1879	16888.7	1879	17543.7
1880	6994.04	1880	4894.51	1880	11921.2	1880	17518.5	1880	14549.4	1880	11406.9	1880	18605.5	1880	18225.7
1881	6704.26	1881	5069.92	1881	8914.58	1881	8535.14	1881	14055.4	1881	9816.02	1881	17968.7	1881	17123
1882	6604.19	1882	5879.05	1882	6097.27	1882	5203.14	1882	16375	1882	11006.8	1882	18700.7	1882	16012.6
1883	7138.03	1883	7169.65	1883	5113.7	1883	7423.71	1883	15078.3	1883	10411.7	1883	17162.6	1883	11403.8
1884	7618.68	1884	7937.68	1884	3093.89	1884	5654.21	1884	18208.4	1884	15985.8	1884	16525.7	1884	11828.9
1885	8045.98	1885	8572.04	1885	2559.19	1885	5149.83	1885	15743.8	1885	12679.5	1885	18520.6	1885	15891
1886	7301.53	1886	7365.88	1886	2961.7	1886	6998.54	1886	13814.5	1886	11389.8	1886	18479.1	1886	16940.9
1887	7923.65	1887	6932.73	1887	4794.16	1887	5651.6	1887	12782.6	1887	9485.22	1887	17643.3	1887	15725.8
1888	7806.19	1888	6456.38	1888	5629.3	1888	6492.59	1888	11577.8	1888	8751.98	1888	16863.5	1888	15812.4
1889	7527.43	1889	6107.53	1889	6840.44	1889	7555.54	1889	10142.2	1889	6693.42	1889	17577.2	1889	17769.8
1890	7053.54	1890	7195.55	1890	6842.51	1890	8005.37	1890	9475.46	1890	7078.54	1890	17866.8	1890	20215
1891	6590.63	1891	5994.14	1891	7736.47	1891	8884.71	1891	12880	1891	11478.2	1891	17819.1	1891	20866.5
1892	5484.56	1892	3620.09	1892	8261.53	1892	10018.1	1892	13883.8	1892	12892.9	1892	18282.2	1892	19419.9
1893	5814.25	1893	3723.27	1893	7782.49	1893	9334.46	1893	15199.6	1893	15219.1	1893	19073.8	1893	17297.4
1894	5878.3	1894	4310.6	1894	7537.09	1894	6978.72	1894	18109.6	1894	17152.7	1894	19663.5	1894	22077.3
1895	9383.44	1895	10063.2	1895	6675.7	1895	6397.08	1895	19197.9	1895	17816.7	1895	17588.5	1895	23129.4
1896	8883.41	1896	11562	1896	5898.46	1896	5837.99	1896	18241	1896	17988.3	1896	16834.7	1896	20815.6
1897	7364.25	1897	9146.93	1897	5874.51	1897	5164.48	1897	17201.6	1897	18107.2	1897	15594	1897	22040.1
1898	7267.81	1898	8147.58	1898	4560.38	1898	4542.38	1898	18694.8	1898	19358.5	1898	16790.5	1898	18364.2
1899	8441.88	1899	7777.71	1899	4943.38	1899	5686.66	1899	18719.2	1899	18392.4	1899	15447.2	1899	19566
1900	9832.68	1900	9585.33	1900	6627.54	1900	5569.65	1900	18190.6	1900	17979.9	1900	17207.6	1900	16237.3
1901	10746.1	1901	9825.58	1901	7506	1901	6087.26	1901	17687.4	1901	17795.6	1901	16187.9	1901	15001.2
1902	13570.2	1902	13271.4	1902	6055.92	1902	5414.82	1902	16761.8	1902	17888.8	1902	17665.5	1902	12093
1903	13974.7	1903	12543	1903	5002.11	1903	4874.71	1903	15149.6	1903	16131.8	1903	17814.2	1903	15661.7
1904	13814.5	1904	10908.7	1904	4197.13	1904	6087.26	1904	14432.6	1904	14465.3	1904	17999.6	1904	12436.5
1905	13628.2	1905	11027.6	1905	3180.41	1905	3336.73	1905	14811.2	1905	12865.5	1905	16586.5	1905	12988.9
1906	13163	1906	11720.6	1906	2988.27	1906	3481.09	1906	12926.2	1906	11474.5	1906	14730.6	1906	10825.5
1907	12750.9	1907	10553.4	1907	3369.62	1907	3400.81	1907	13545.4	1907	11578.3	1907	11653.4	1907	6283.56
1908	13415.8	1908	9877.06	1908	3297.96	1908	2835.57	1908	13338.6	1908	12419.8	1908	13622.3	1908	9870.92
1909	13290.8	1909	10076.5	1909	3022.8	1909	2702.65	1909	14531	1909	13051.6	1909	12716.8	1909	8254.67
1910	13774.8	1910	12288.8	1910	3289.03	1910	3509.97	1910	14358.9	1910	12023.1	1910	14680.8	1910	11055.1
1911	13467.8	1911	11351.3	1911	3066.03	1911	3194.25	1911	12667.1	1911	10225.5	1911	16834	1911	14472.4
1912	12182.5	1912	10684.7	1912	4184.2	1912	5422.34	1912	13773.1	1912	11621.5	1912	17714.3	1912	15970.6
1913	11829.7	1913	9296.53	1913	2931.75	1913	3187.58	1913	14419.3	1913	11334.2	1913	17165	1913	13800.1
1914	11408.4	1914	9312.09	1914	3070.5	1914	2559.09	1914	14180.9	1914	12437.3	1914	14896.4	1914	10545.2
1915	11646.2	1915	9213.02	1915	2540.34	1915	3558.11	1915	14749.8	1915	13977.8	1915	13780.6	1915	9954.1
1916	11626.2	1916	10496.1	1916	3965.38	1916	6667.97	1916	13914.4	1916	15343.8	1916	10717.4	1916	10239.2
1917	11418.9	1917	10660.1	1917	6943.53	1917	8471.19	1917	13907	1917	16517.6	1917	9816.05	1917	10635.9
1918	8541.23	1918	8797.06	1918	7279.8	1918	10742.3	1918	13008.4	1918	14956.4	1918	9613.64	1918	10302.9
1919	10037	1919	10429.5	1919	5979.56	1919	10360.6	1919	14399.3	1919	14848.2	1919	10611.1	1919	8978.91
1920	10796.1	1920	9923.75	1920	4603.5	1920	10442.3	1920	12730.5	1920	13392.1	1920	11579	1920	9885.92
1921	10838.5	1921	10045.3	1921	5406.35	1921	11536	1921	10606	1921	11405.5	1921	13813.5	1921	10947.9
1922	12054.8	1922	10843.5	1922	4860.36	1922	11536.9	1922	12761.9	1922	12427.8	1922	13880.6	1922	12144.5
1923	12097.3	1923	10560.1	1923	4259.73	1923	11827.8	1923	12541.5	1923	12466.2	1923	15733.6	1923	13081
1924	11925.9	1924	12348.3	1924	3155.57	1924	11614.8	1924	10531.5	1924	9601.97	1924	14347.3	1924	12681.5
1925	11239.1	1925	11428.4	1925	2691.82	1925	8929.15	1925	11995.4	1925	12481.5	1925	13963.1	1925	13064.9
1926	12034.2	1926	10442.3	1926	3205.78	1926	9018.17	1926	10209.4	1926	10394.9	1926	16017.6	1926	14127.3
1927	10694.9	1927	9360.37	1927	3822.62	1927	5162.36	1927	8465.6	1927	8542.4	1927	19576	1927	18697.6
1928	10707.2	1928	10028.3	1928	3623.53	1928	3830.33	1928	9803.48	1928	11741.2	1928	17006.5	1928	17918.2
1929	9340.19	1929	10042.1	1929	4557.34	1929	3799.19	1929	6614.55	1929	9064.76	1929	16576.2	1929	17628.2
1930	9048.15	1930	9572.12	1930	6026.11	1930	5781.12	1930	5247.38	1930	6668.72	1930	16576.9	1930	17528.1
1931	6539.82	1931	8326.94	1931	5803.04	1931	6908.84	1931	4322.66	1931	4163.09	1931	15649.8	1931	17943.6
1932	5324.81	1932	6193.65	1932	5611.88	1932	6942.72	1932	5845.35	1932	5807.62	1932	14730.6	1932	17874.6
1933	5653.63	1933	6128.27	1933	5810.8	1933	6263.54	1933	4594.6	1933	3765.94	1933	12458.1	1933	14957.2
1934	5759.31	1934	6265.55	1934	7302.46	1934	7021.83	1934	4194.52	1934	3117.26	1934	12355.4	1934	15592.7
1935	6304.56	1935	5649.03	1935	8374.12	1935	8069.08	1935	3863.54	1935	2200.28	1935	8964.27	1935	10579.9
1936	7883.27	1936	7697.02	1936	8470.65	1936	7902.86	1936	4412.83	1936	2179.88	1936	7575.47	1936	6531.3
1937	8376.64	1937	7147.45	1937	7927.99	1937	7222.93	1937	7903.71	1937	5367.07	1937	7097.49	1937	7086.78
1938	10254.3	1938	8524.44	1938	7202.02	1938	5946.72	1938	7491.4	1938	5767.38	1938	6724.36	1938	7309.92
1939	14092	1939	10812.6	1939	6278.49	1939	4401.7	1939	6606.23	1939	6219.17	1939	7072.15	1939	5913.74
1940	13050.4	1940	11270.9	1940	5526.8	1940	4253.32	1940	6378.66	1940	6141.6	1940	7997.38	1940	7275.79
1941	14634.5	1941	13154	1941	6477.66	1941	5067.9	1941	6034.52	1941	6580.96	1941	8458.98	1941	8410.13
1942	12519.7	1942	9642.6	1942	5940.66	1942	7313.31	1942	6694.81	1942	5650.98	1942	9732.82	1942	9740.73
1943	12308	1943	8911.13	1943	5523.04	1943	8225.03	1943	10793.4	1943	7096.1	1943	9423.97	1943	9998.72
1944	12042.8	1944	9331.13	1944	6740.7	1944	9329.4	1944	9324.61	1944	5790.49	1944	9205.76	1944	9393.74
1945	11706.9	1945	9466.8	1945	6613.6	1945	8250.71	1945	9962.64	1945	5925.24	1945	8907.76	1945	10294.7
1946	10993	1946	9808.93	1946	7175.07	1946	9266.27	1946	9985.27	1946	7301.1	1946	8711.76	1946	9080.25
1947	11014	1947	10122.8	1947	5886.86	1947	6959.35	1947	8461.72	1947	5472.62	1947	7789.88	1947	8482.1
1948	10434.2	1948	9711.25	1948	5401.75	1948	6884.48	1948	6994.19	1948	3958.63	1948	7671.81	1948	8004.43
1949	10492.6	1949	11233.4	1949	5583.56	1949	5302.27	1949	6291.48	1949	4281.37	1949	7546.37	1949	8817.79
1950	10014.2	1950	11153.1	1950	5546.52	1950	4402.8	1950	6676.35	1950	4543.82	1950	7040.22	1950	10931.7
1951	11978.6	1951	12391.4	1951	5985.73	1951	6066.58	1951	5809.66	1951	5046.69	1951	8531.72	1951	12392
1952	11669.9	1952	11237.6	1952	5639.15	1952	7257.97	1952	7477.62	1952	6771.83	1952	9338.32	1952	14712.6
1953	14380.4	1953	12677.2	1953	3940.79	1953	7352.19	1953	5541.19	1953	4983.44	1953	7439.26	1953	13866
1954	16011.9	1954	14273.8	1954	3735.82	1954	7413.15	1954	4956.46	1954	3642.92	1954	5063.18	1954	9327.73
1955	16674.7	1955	15078.1	1955	2417.01	1955	5688.8	1955	4033.68	1955	2164.84	1955	3805.37	1955	7351.59
1956	15498.5	1956	14360.6	1956	2289.3	1956	6039.03	1956	3849.58	1956	2543.79	1956	3030.28	1956	5787.7
1957	14732	1957	15054.6	1957	4177.44	1957	8780.43	1957	3940.84	1957	2510.29	1957	1341.51	1957	4482.43
1958	14769.3	1958	14101.7	1958	6277.39	1958	8875.17	1958	2791.34	1958	1426.97	1958	2097.62	1958	6122.88
1959	15902.7	1959	12906.5	1959	6231.39	1959	9096.25	1959	3269.12	1959	2063.83	1959	1338.95	1959	5100.64
1960	16056	1960	10836.5	1960	5626.6	1960	6493.76	1960	3603.63	1960	2133.2	1960	3434.1	1960	6923.23
1961	14490.6	1961	10753.2	1961	6479.01	1961	8060.98	1961	2746.24	1961	1351.3	1961	3960.42	1961	6336.22
1962	13982.2	1962	11248.4	1962	5658.07	1962	7530.53	1962	4836.26	1962	3216.05	1962	5131.92	1962	6031.77
1963	13263.7	1963	12175.4	1963	4171.81	1963	7341.74	1963	4303.02	1963	2955.88	1963	5652.39	1963	8712.55
1964	13731.7	1964	12270.8	1964	5031.18	1964	7296.71	1964	4306.7	1964	2280.89	1964	5695.65	1964	9363.17
1965	15649.4	1965	14498	1965	7133.01	1965	11568.3	1965	11135.3	1965	7012.36	1965	5524.68	1965	8952.65
1966	16384.4	1966	17162.3	1966	6782.88	1966	12566.2	1966	9234.78	1966	4940.05	1966	4474.8	1966	8629.13
1967	15279.6	1967	18384.9	1967	7625.65	1967	13275.1	1967	9502.38	1967	6092.61	1967	3380.93	1967	5116.06
1968	13007.9	1968	17143.4	1968	8068.09	1968	8507.38	1968	11225.1	1968	7318.41	1968	2936.3	1968	3304.91
1969	13313.1	1969	13606.1	1969	7994.36	1969	8092.55	1969	12451.7	1969	8526.65	1969	5654.39	1969	4310.7
1970	11913.1	1970	12328.3	1970	7506.34	1970	6250.91	1970	12260.2	1970	11613.2	1970	5461.13	1970	3642.34
1971	11859.3	1971	10736.3	1971	7293.62	1971	8879.19	1971	11968.4	1971	10926.6	1971	5681.81	1971	5126.92
1972	11176.1	1972	11316.8	1972	6585.58	1972	7762.05	1972	12234.2	1972	12155.7	1972	6981.83	1972	6580.54
1973	11449.4	1973	10401.7	1973	5607.91	1973	9066.52	1973	13509.1	1973	14043	1973	8327.4	1973	5935.82
1974	11510.9	1974	11172.3	1974	5547.97	1974	9199.43	1974	14077	1974	13363.4	1974	7552.61	1974	5931.09
1975	10847.6	1975	11377.7	1975	6654.29	1975	11762.5	1975	12367.1	1975	11636.2	1975	8491.5	1975	4844.15
1976	10018.7	1976	10939.1	1976	7712.86	1976	12803.7	1976	11733	1976	11010.5	1976	7863.56	1976	5279.65
1977	9574.9	1977	9832.16	1977	8634.16	1977	14421.2	1977	10592.5	1977	9984.73	1977	7047.56	1977	5918.43
1978	8814.01	1978	9397.64	1978	10460.9	1978	13382	1978	10943	1978	8430.9	1978	6644	1978	6634.69
1979	9720.39	1979	8811	1979	11218.4	1979	13355.8	1979	10536.3	1979	6818.08	1979	9171.99	1979	8216.94
1980	9990.03	1980	9830.02	1980	11138.9	1980	11795.8	1980	8938.58	1980	7085.38	1980	10557.5	1980	8840.82
1981	10655.8	1981	10142.9	1981	11599.9	1981	15498.7	1981	6611.58	1981	6483.64	1981	9727.25	1981	9416.84
1982	10853.9	1982	9727.32	1982	9748.24	1982	15155.7	1982	4970.19	1982	5383.83	1982	9806.63	1982	10442.9
1983	10334	1983	9567.8	1983	8686.69	1983	11983.9	1983	4868.46	1983	5195.43	1983	10363.1	1983	11074.1
1984	9732.1	1984	9419.32	1984	7840.61	1984	10592	1984	5119.74	1984	5037.1	1984	9290.35	1984	10386.3
1985	9989.73	1985	10393.3	1985	7249.76	1985	11352.1	1985	5657.82	1985	5677.7	1985	8146.09	1985	9709.75
1986	9775.12	1986	11416.5	1986	6392.66	1986	10578.7	1986	4894.56	1986	4711.3	1986	8262.41	1986	9949.35
1987	9573.53	1987	9540.01	1987	4336.2	1987	6690.08	1987	6960.56	1987	5637.49	1987	9321.54	1987	10524.2
1988	9418.02	1988	9664.83	1988	5878.85	1988	5614.41	1988	5745.86	1988	4292.31	1988	10569.3	1988	11378.4
1989	9542.08	1989	9801.78	1989	4686.52	1989	5198.03	1989	7181.88	1989	5559.73	1989	11158.2	1989	10577
1990	9470.55	1990	10054.3	1990	6874.39	1990	5131.22	1990	7515.93	1990	4433.14	1990	11027.5	1990	10835.6
1991	8901.4	1991	8617.31	1991	7606.72	1991	6321.15	1991	6483.09	1991	3823.67	1991	10900.5	1991	10999.5
1992	7817.38	1992	7667.49	1992	7629.13	1992	9373.06	1992	6620.33	1992	4949.9	1992	10178.9	1992	10437.4
1993	7228.43	1993	7619.22	1993	9648.74	1993	11245.9	1993	8593.04	1993	7584.91	1993	10593.3	1993	10473.6
1994	7598.52	1994	7273.57	1994	11379.8	1994	13909.7	1994	10276.5	1994	8085.09	1994	10080.6	1994	11466.6
1995	7825.61	1995	6699.34	1995	10817.6	1995	13985.2	1995	11924.4	1995	9541.83	1995	9780.08	1995	11684.6
1996	8277.08	1996	8733.82	1996	9113.38	1996	11628.1	1996	12685.6	1996	9599.71	1996	8826.82	1996	11059.7
[truncated: 6,004 more rows]

## Sheet: R208A-K137E
																Figure 5d
K137E-GFP		R208A-RFP		K137E-GFP		R208A-RFP		K137E-GFP		R208A-RFP		K137E-GFP		R208A-RFP
Pixel	Intensity	Pixel	Intensity	Pixel	Intensity	Pixel	Intensity	Pixel	Intensity	Pixel	Intensity	Pixel	Intensity	Pixel	Intensity
0	6173.33	0	4176	0	8095.7	0	6895.75	0	5385.71	0	6113.21	0	12045	0	10619.2
1	8652.86	1	5541.33	1	8617.02	1	7201.76	1	6182.17	1	7110.18	1	14456.9	1	11851.1
2	10089.8	2	6756.87	2	8082.31	2	7443.75	2	8232.04	2	7145.13	2	13899.1	2	13336.3
3	10600.5	3	7057.91	3	7330.87	3	6705.85	3	8251.01	3	6861.94	3	11139.9	3	12908.3
4	10260.2	4	6359.52	4	7709.84	4	7321.02	4	7926.71	4	6657.18	4	9621.27	4	11475.7
5	9657.71	5	5947.13	5	7646.23	5	7381.65	5	6540.32	5	6651.09	5	10619.7	5	13036.2
6	9171.59	6	5394.28	6	6493.59	6	7342.8	6	6567.57	6	7010.3	6	12897	6	13653.1
7	9394.35	7	5600.57	7	5111.53	7	5745.34	7	6380.69	7	6452.54	7	11449.9	7	13014.8
8	10107.5	8	6704.14	8	4375.9	8	4286.36	8	5841.26	8	5933.88	8	8768.34	8	11178.1
9	9833.51	9	7723.7	9	4413.79	9	4728.88	9	6400.91	9	7398.22	9	12185.8	9	14418.3
10	10494.6	10	8574.98	10	4276.8	10	4370.68	10	5846.03	10	6717.3	10	15226.5	10	13915.9
11	10760	11	8466.36	11	4811.06	11	5323.69	11	4207.8	11	4303.33	11	14416.9	11	11182.6
12	11743.3	12	8450.89	12	4456.14	12	4976.58	12	5007.56	12	5784.04	12	14435.4	12	9564.81
13	9680.59	13	5856.9	13	4674.01	13	3930.12	13	3611.18	13	4047.83	13	14833.1	13	7099.66
14	8572.66	14	4599.89	14	5298.26	14	5363.42	14	3068.3	14	4584.17	14	13944.8	14	7555.59
15	8047.74	15	5357.98	15	6497.94	15	6404.53	15	3963.63	15	5465.25	15	12664.4	15	5730.34
16	6329.56	16	3840.43	16	6353.39	16	6931.62	16	3284.43	16	4973.56	16	13062.8	16	8319.35
17	4123.61	17	2318.49	17	6907.84	17	7370.7	17	3288.25	17	3575.17	17	13351.8	17	10154.1
18	5077.47	18	3417.51	18	7814.7	18	8122.51	18	4401.87	18	5414.77	18	13296.6	18	11027.5
19	5575.99	19	3709.59	19	6524.74	19	7242.17	19	5341.35	19	6344.62	19	12272.2	19	10205.9
20	3692.23	20	2275.46	20	6107.08	20	6995.65	20	4396.36	20	4767.66	20	11881	20	9558.32
21	3274.14	21	2434.92	21	6470.92	21	7782.94	21	3258.87	21	4490.03	21	12483.7	21	9965.7
22	3084.75	22	2284.85	22	6351.05	22	6601.16	22	3545.66	22	4265.85	22	13043.9	22	10008.6
23	3326.49	23	1914.35	23	7242.3	23	6008.77	23	3700.16	23	3763.46	23	11709.9	23	10468
24	3816.38	24	2019.6	24	7631.88	24	6818.57	24	4633.18	24	4941.57	24	10855.5	24	11332.9
25	4917.62	25	2375.57	25	7390.66	25	6230.98	25	3657.35	25	3684.3	25	10805.6	25	12703.4
26	3958.97	26	2244.82	26	6793.98	26	7975.75	26	2487.55	26	2282.82	26	11525.3	26	11680.6
27	5490.46	27	3082.9	27	5826.51	27	6766.83	27	2094.29	27	1809.66	27	12215.1	27	11514.3
28	5973.59	28	3441.73	28	5261.42	28	6796.95	28	1747.05	28	2113.57	28	12729.9	28	12278
29	6005.55	29	3924.49	29	5587.06	29	6623.1	29	2027.99	29	1877.16	29	14607	29	12084.7
30	5916.92	30	3754.92	30	5122.74	30	7648.62	30	2712.34	30	3238.22	30	15469.3	30	12761.6
31	5555.98	31	3783.72	31	4907.17	31	7048.22	31	2927.03	31	4804.86	31	16284.5	31	12464.3
32	6290.46	32	4728.75	32	3212.44	32	5175.06	32	3326.1	32	5100.89	32	14479.2	32	12229.5
33	6113.32	33	4654.98	33	4446.74	33	6586.05	33	3706.47	33	5721.09	33	15363.5	33	11771.5
34	5927.4	34	4860	34	3172.53	34	4619.64	34	5009.11	34	5870.27	34	12854.7	34	11293
35	7980.92	35	6920.41	35	2138.63	35	3570.21	35	4583.92	35	5789.94	35	12996.7	35	10225.8
36	6400.44	36	5229.73	36	2972.51	36	4146.27	36	5044.5	36	5156.92	36	11358.5	36	8570.77
37	7575.23	37	6911.35	37	4263.33	37	4857.89	37	4964.32	37	4969.66	37	11125.6	37	7669.51
38	6980.92	38	6351.39	38	4293.03	38	4343.58	38	5250.98	38	5627.79	38	9682.49	38	6226.48
39	6110.86	39	5701.7	39	3307.69	39	3151.93	39	5583.35	39	6262.28	39	9853.1	39	7435.52
40	8987.57	40	8885.22	40	2292.71	40	2382.75	40	8980.03	40	9256.41	40	9849.76	40	7289.12
41	10843.2	41	10111	41	2052.72	41	1681.34	41	7317.76	41	7951.4	41	10249.1	41	8311.68
42	11446.7	42	9985.2	42	3003.84	42	1792.24	42	8899.93	42	8441.94	42	11137.1	42	9422.32
43	11553.9	43	9731.15	43	4457.25	43	2737.23	43	9467.1	43	8997.79	43	11829	43	8600.95
44	12632.4	44	10341.1	44	5330.12	44	3771.96	44	9299.33	44	8671	44	12898.9	44	8858.89
45	11595.5	45	9982.21	45	5193.89	45	4466.13	45	9482.1	45	9600.26	45	9328.31	45	5881.81
46	8981.15	46	8537.01	46	4121.44	46	4083.53	46	10874	46	10625.4	46	11859.7	46	8345.42
47	9464.17	47	9386.18	47	2909.78	47	2594.95	47	12023.7	47	9925.48	47	9976.47	47	4734.73
48	8484.71	48	8007.92	48	2839.56	48	1955.45	48	11281.8	48	9968.51	48	10967.3	48	7499.09
49	9012.03	49	8384.54	49	3336.91	49	2038.16	49	9492.58	49	8026.78	49	9040.92	49	5218.46
50	8937.93	50	7602.37	50	3755.75	50	2517.7	50	7184.01	50	6081.86	50	6071.75	50	2774.74
51	8842.16	51	7200.16	51	4746.05	51	3367.13	51	5360.57	51	4700.21	51	5873.91	51	3476.08
52	10134.1	52	7833.27	52	5982.3	52	4276.57	52	5930.74	52	5391.73	52	4796.31	52	2832.53
53	9699.32	53	6953.36	53	6576.82	53	5142.65	53	7310.96	53	6773.01	53	5008.17	53	3273
54	7675.65	54	5808.13	54	6451.43	54	5553.54	54	7228.75	54	6606.16	54	3148.63	54	4283.12
55	7822.89	55	5511.76	55	6143.13	55	6165.28	55	7555.08	55	7028.55	55	4675.47	55	4416.88
56	10743	56	7906.28	56	5824.6	56	6374.93	56	8969.4	56	8967.13	56	4882.31	56	4239.98
57	9773.03	57	6873.28	57	5059.53	57	5612.62	57	8603.72	57	8222.6	57	4773.03	57	3075.57
58	7639.2	58	5731.03	58	4140.56	58	4572.64	58	9906.29	58	8469.57	58	4481.7	58	2787.46
59	10101.4	59	9075.6	59	3430.38	59	3861.19	59	8634.77	59	8071.24	59	3849.97	59	2438.59
60	7433.61	60	7006.63	60	2857.83	60	2941.03	60	7421.15	60	6690.13	60	4155.88	60	2930.51
61	6759.11	61	6502.03	61	3821.64	61	3759.34	61	7488.58	61	6834.8	61	4868.81	61	2915.11
62	8338.46	62	8444.59	62	3917.16	62	3683.47	62	3286.68	62	3338.2	62	6258.28	62	4093.09
63	8826.09	63	8570.85	63	3866.05	63	3755.45	63	3028.48	63	3434.07	63	6888.13	63	3820.99
64	7979.67	64	7548.2	64	4180.23	64	4069.2	64	2924.71	64	2573.01	64	6614.93	64	4077.94
65	7463.59	65	7495.04	65	5295.71	65	5802.17	65	2706.02	65	2808.3	65	6716.65	65	5090.02
66	6609.21	66	6750.75	66	5435.43	66	5945.7	66	3227.01	66	3912.92	66	6487.84	66	5292.58
67	7821.74	67	8710.4	67	7513.63	67	7078.49	67	2460.13	67	2054.25	67	6461.61	67	5675.9
68	6526.52	68	7287.38	68	7758.82	68	7301.49	68	1746.9	68	2827.74	68	6108.12	68	5902.21
69	6564.68	69	6787.46	69	7136.05	69	7255.53	69	2663.01	69	3528.7	69	6721.94	69	5617.68
70	7731.63	70	6638.34	70	7060.52	70	6943.79	70	2096.55	70	2959.44	70	5663.28	70	5182.48
71	8990.07	71	7444.2	71	7793.74	71	6938.11	71	1426.15	71	2164.2	71	5273.38	71	5183.19
72	7956.03	72	6123.58	72	7335.77	72	6628.17	72	2223.8	72	3550.32	72	4514.68	72	5207.35
73	10053.2	73	7680.09	73	6967.48	73	6162.33	73	2428.03	73	3333.26	73	4571.64	73	5493.05
74	8141.27	74	5808.55	74	7446.37	74	6804.88	74	4025.24	74	4132.12	74	4287.02	74	5865.49
75	8256.12	75	6443.74	75	7891.33	75	7422.76	75	2506.76	75	2429.31	75	4314.54	75	6700.6
76	11597.9	76	9256.68	76	8256.87	76	7207.48	76	3493.03	76	2923.52	76	4390.98	76	7070.24
77	9652.69	77	7520.03	77	8369.07	77	6712.58	77	1247.19	77	748.628	77	4554.61	77	7326.4
78	7928.09	78	5968.66	78	8612.36	78	7068.54	78	648.34	78	964.824	78	4157.03	78	7253.09
79	9649.08	79	7241.85	79	8676.49	79	7116.89	79	978.534	79	1272.23	79	4149.96	79	6824.81
80	8159.6	80	6125.13	80	8855.63	80	7166.41	80	466.003	80	565.209	80	3709.43	80	5189.68
81	7702.23	81	5880.46	81	9109.45	81	8337.43	81	2372.96	81	2508.25	81	4463.49	81	7305.97
82	6690.27	82	4409.1	82	9567.94	82	8100.66	82	1699.37	82	1232.04	82	4077.58	82	5620.66
83	5855.74	83	3438.04	83	8999.69	83	8500.36	83	1469.9	83	1311.8	83	5435.99	83	6474.48
84	4793.98	84	2619.22	84	8257.22	84	8323.42	84	1532.16	84	1763.66	84	6320.97	84	7323.05
85	4095.09	85	2265.53	85	7290.65	85	8029.44	85	3696.72	85	3053.89	85	6612.41	85	7832.72
86	2814.5	86	1870.51	86	7760.24	86	8501.64	86	2556.89	86	2444.11	86	6775.48	86	6899.57
87	2249.15	87	1433.62	87	8776.69	87	8663	87	2756.13	87	3238.24	87	7072.94	87	6883.1
88	2669.67	88	1889.91	88	9239.05	88	8412.37	88	4339.54	88	4329.54	88	7377.81	88	6998.82
89	2886.76	89	2216.79	89	9436.32	89	8117.31	89	6335.35	89	5536.35	89	6657.25	89	7267.47
90	3433.97	90	2662.86	90	10014.5	90	9763.01	90	9576.06	90	8007.75	90	4607.39	90	5421.8
91	4780.84	91	4029.02	91	9769.35	91	10308.9	91	11024.2	91	9782.66	91	4271.43	91	4957.09
92	4294.16	92	3459.25	92	9118.02	92	9767.92	92	12348	92	10755.1	92	2946.05	92	3709.36
93	4580.73	93	3794.43	93	8966.76	93	10327	93	11368	93	8822.02	93	3382.91	93	3460.12
94	4229.1	94	4176.89	94	9071.56	94	11291.5	94	10653.7	94	8310.61	94	2068.38	94	2625.75
95	4103.04	95	4310.06	95	8719.41	95	10712.9	95	7823.18	95	7387.83	95	1455.03	95	2808.86
96	4489.41	96	5833.45	96	8131.4	96	9634.12	96	9088.74	96	7998.36	96	1297.08	96	2573.39
97	4307.73	97	5894.81	97	7206.69	97	8481.36	97	9080.35	97	7147.11	97	1411.69	97	3044.2
98	5893.55	98	6326.67	98	6273.95	98	7198.88	98	8119.26	98	6602.43	98	1297.5	98	2639.43
99	6237.44	99	6770.43	99	5922.78	99	6509.1	99	7054.65	99	6522.14	99	1322.92	99	2549.09
100	7058.76	100	6745.75	100	5209.09	100	5579.33	100	6406.25	100	6250.11	100	905.476	100	1999.2
101	6172	101	5811.05	101	7868.86	101	9230.54	101	7582.07	101	7254.68	101	970.354	101	2434.3
102	6818.52	102	6193.16	102	6954.67	102	7541.61	102	8736.98	102	8227.91	102	1288.18	102	2806.87
103	5469.56	103	5694.9	103	5814.71	103	6248.32	103	10531.8	103	10170.1	103	1698.34	103	2386.13
104	4842.19	104	5100.57	104	5259.37	104	5618.14	104	12187.9	104	12630.1	104	2100.43	104	2583.74
105	5509.47	105	5237.12	105	4733.12	105	5711.02	105	12997	105	13756.6	105	3053.93	105	3179.49
106	5763.83	106	5171.27	106	7429.11	106	9804.29	106	11532.5	106	9217.12	106	4036.72	106	3096.13
107	5676.04	107	3932.24	107	5705.11	107	7404.71	107	10227	107	8749.85	107	3751.65	107	3219.72
108	5406.97	108	3821.67	108	5320.52	108	6254.63	108	8112.36	108	6554.94	108	3702.07	108	3649.74
109	4841.61	109	4289.63	109	6621.56	109	7336.37	109	8079.03	109	6692.73	109	3927.06	109	3739.64
110	3969.72	110	3865.99	110	6002.95	110	6722.8	110	7147.97	110	6229.88	110	4407.68	110	4603.15
111	2882.24	111	3015.39	111	7389.92	111	7290.56	111	6524.68	111	4529.63	111	1624.88	111	2294.03
112	2285.59	112	2558.92	112	6834.95	112	6680.24	112	6936.72	112	5906.61	112	1438.84	112	2234.72
113	2210.73	113	2290.82	113	5549.5	113	6058.27	113	9626.34	113	7865.51	113	993.191	113	1625.56
114	2428.48	114	2349.96	114	4867.9	114	5692.41	114	8057.14	114	7365.78	114	936.474	114	1330.23
115	2211.61	115	2659.16	115	4376.46	115	4856.24	115	5914.87	115	4696.62	115	1235.97	115	1822.27
116	2115.49	116	2907.68	116	4555.19	116	4825.4	116	3897.78	116	2910.66	116	1381.09	116	1354.53
117	1800.51	117	2280.24	117	5144.82	117	5901.29	117	4292.3	117	3493.09	117	1856.2	117	1942.27
118	1806.32	118	2291.32	118	6468.11	118	7235.89	118	3705.87	118	4095.48	118	2055.2	118	2345.91
119	2812.94	119	3250.56	119	5729.2	119	6874.15	119	5849.43	119	7570.43	119	2495.89	119	3183.59
120	3380.91	120	3720.42	120	5208.98	120	6639.64	120	7921.07	120	8813.77	120	3014.6	120	3388.23
121	3623.86	121	3470.13	121	4827.3	121	6027.65	121	8108.33	121	8770.98	121	3063.2	121	2980.04
122	3789.31	122	3515.44	122	4289.15	122	5417.46	122	8433.65	122	9512.4	122	2490.18	122	3339.79
123	4032.38	123	3541.01	123	4827.38	123	6501.97	123	8939.53	123	9461.42	123	3355.01	123	2868.28
124	3398.9	124	2269.25	124	5531.96	124	7114.02	124	8708.14	124	9792.96	124	3708.62	124	2765.22
125	3777	125	3553.25	125	5356.47	125	6914.73	125	7531.6	125	9269.66	125	4287.03	125	3010.2
126	4342.19	126	4420.01	126	5516.71	126	6517.23	126	6829.8	126	8590.64	126	5347.89	126	3902.8
127	5456.02	127	5588.4	127	5548.35	127	6013.28	127	7386.92	127	8929.76	127	6434.29	127	5131.93
128	6077.33	128	5218.86	128	5154.1	128	5535.39	128	8866.05	128	10361.5	128	7094.54	128	5039.51
129	5760.47	129	4203.34	129	4960.19	129	5058.51	129	11136.1	129	11932.3	129	7617.5	129	6752.02
130	5604.88	130	3816.08	130	5023.74	130	4617.7	130	13865.8	130	13879.9	130	7330.37	130	6746.77
131	4996.45	131	3955.93	131	5001.28	131	4834.88	131	13614.9	131	15295.2	131	7016.99	131	6005.58
132	6751.69	132	5943.43	132	4717.16	132	4856.74	132	7888.95	132	9648.98	132	7196.23	132	5934.98
133	5666.86	133	5137.24	133	4481.4	133	4748.99	133	3937.36	133	4861.69	133	7145.4	133	7890.47
134	4145.22	134	3667.93	134	4289.94	134	4510.83	134	3346.57	134	4595.65	134	6282.84	134	5759.22
135	2797.72	135	1808.11	135	4024.45	135	4264.59	135	6135.36	135	7108.1	135	5876.86	135	5010.43
136	2609.81	136	1452.39	136	4560.9	136	4766.53	136	4888.82	136	5704.5	136	4308.14	136	3610.26
137	1704.31	137	1078.69	137	6791.75	137	6358.94	137	6048.01	137	7902.23	137	4438.61	137	3982.28
138	1180.19	138	656.244	138	6634.65	138	5942.9	138	5019.35	138	6407.55	138	5691.04	138	4599.82
139	664.356	139	243.334	139	6476.45	139	5539.42	139	7278.23	139	9417.46	139	4796.37	139	3902.84
140	597.655	140	295.256	140	6753.19	140	5653.05	140	8306.71	140	9732.29	140	5134.37	140	4243.25
141	1256.61	141	855.222	141	6884.88	141	5871.22	141	12153.4	141	11840.7	141	4988.6	141	3025.91
142	830.031	142	654.9	142	6557.25	142	5769.37	142	11570.6	142	7955.42	142	4389.88	142	3062.72
143	892.829	143	689.899	143	6089.65	143	5821.83	143	5680.36	143	3554.46	143	6281.03	143	3880.65
144	406.846	144	386.693	144	5799.64	144	5798.87	144	7884.48	144	5366.73	144	6887.05	144	5492.12
145	1058.74	145	832.53	145	5495.4	145	5497.48	145	4572.52	145	3090.01	145	5331.41	145	4883.87
146	972.48	146	689.323	146	5634.81	146	5741.92	146	3536.59	146	3124.77	146	4743.03	146	5029.37
147	1706.26	147	1545.5	147	6023.38	147	6732.28	147	4656.41	147	3977.19	147	3969.36	147	3930.7
148	1407.31	148	1353.97	148	6560.6	148	6950.63	148	7448.99	148	6552.84	148	2283.26	148	2402.01
149	1423.11	149	1399.94	149	7290.75	149	7014.83	149	9071.91	149	7224.79	149	2389.83	149	2375.25
150	2079.99	150	1870.21	150	8912.25	150	7643.25	150	10702.7	150	6805.35	150	2903.79	150	2910.48
151	2038.34	151	1869.84	151	9233.43	151	7151.72	151	10111.8	151	6100.06	151	2576.23	151	2768.52
152	2447.8	152	2250.96	152	8763.54	152	7303.87	152	6805.89	152	5619.23	152	2930.62	152	1938.51
153	3779.84	153	3268.81	153	8576.56	153	7319.64	153	5937.23	153	4106.66	153	3735.78	153	1721.75
154	3942.98	154	3305.31	154	8381.36	154	7213.27	154	3838.01	154	3740.6	154	3297.83	154	1381.66
155	3840.36	155	3304.46	155	8359.69	155	6849.91	155	4628.82	155	4271.4	155	4887.22	155	2725.16
156	3913.32	156	2742.68	156	8930.7	156	6615.6	156	4469.55	156	3970.32	156	4694.73	156	3674.89
157	3718.72	157	2740.08	157	9823.35	157	7304.19	157	4246.88	157	3530.61	157	3538.47	157	4030.23
158	4165.55	158	3218.22	158	12499.6	158	9363.68	158	5375.21	158	4623.94	158	3629.44	158	4413.71
159	5661.07	159	3982.67	159	12296	159	10049.1	159	8020.75	159	7539.19	159	3343.05	159	3763.45
160	6784.3	160	4501.99	160	12284.7	160	10956.5	160	6458.59	160	6200.09	160	2944.99	160	1404.67
161	5917.31	161	3637.71	161	12570.4	161	11474.3	161	4845.71	161	4874.36	161	5301.86	161	2875.86
162	5846.66	162	3680.64	162	13035.6	162	11959.1	162	7661.88	162	8488.99	162	4672.76	162	2576.97
163	4756.13	163	2189.25	163	13114.3	163	11836	163	5944.25	163	6049.9	163	4929.35	163	2426.09
164	5164.05	164	2790.77	164	14382.6	164	11722.7	164	5185.83	164	6362.27	164	8837.49	164	5775.91
165	6088.93	165	3880.59	165	13848.7	165	11310	165	6321.03	165	5159.34	165	8435.23	165	7610.92
166	7646.65	166	5604.5	166	14117.9	166	10938.8	166	5125.46	166	4442.88	166	7846.57	166	8847.29
167	8445.67	167	5766.93	167	14036.6	167	10498.9	167	3472.55	167	1830.05	167	8838.86	167	8852.09
168	6412.17	168	4278.89	168	9884.5	168	7465.32	168	2677.57	168	1179.2	168	8709.61	168	7332
169	6979.42	169	4479.81	169	9694.76	169	7057.67	169	1729.85	169	486.342	169	8441.65	169	6633.52
170	7423.16	170	5084.84	170	10044.4	170	8104.8	170	1323.97	170	260.715	170	9050.96	170	8291.17
171	9398.29	171	7216.61	171	10355.2	171	8653.1	171	547.045	171	342.067	171	8147.01	171	7800.57
172	10150	172	9005.91	172	10217.7	172	8718.34	172	677.815	172	1251.09	172	7387.54	172	7177.16
173	9804.12	173	8648.46	173	12492.5	173	9899.86	173	531.13	173	1066.85	173	6825.24	173	7423.3
174	8115.56	174	6615.23	174	12275.4	174	9193.25	174	1424.91	174	1952.51	174	6510.12	174	7712.72
175	7638.97	175	5531.88	175	11185.8	175	8413.6	175	3680.31	175	5895.76	175	7785.02	175	8378.69
176	7976.11	176	5429.58	176	10960	176	8153.78	176	5267.57	176	7637.26	176	8380.06	176	8150.18
177	7475.95	177	5860.19	177	11361.1	177	8271.89	177	6721.58	177	9450.4	177	9253.28	177	7842.15
178	6645.96	178	4788.94	178	12432.8	178	9647.92	178	9708.75	178	10336.3	178	9783.11	178	7323.84
179	5754.57	179	4451.82	179	10310.9	179	7814.15	179	9874.18	179	9719.34	179	12179.8	179	8666.93
180	5014.82	180	3776.17	180	10773.8	180	8366.39	180	10337.7	180	9169.28	180	12837.1	180	10433.3
181	5507.24	181	3533.19	181	11241.1	181	9521.32	181	8387.43	181	6576.06	181	11835.6	181	9269.33
182	7604.48	182	4774.93	182	11809.2	182	9814.55	182	8712.86	182	6455.92	182	8195.26	182	6026.72
183	10357	183	7441.57	183	11383.4	183	8972.26	183	8692.99	183	6107.62	183	3831.26	183	3536.26
184	11599.2	184	8908.33	184	11165.4	184	9030.25	184	6913.86	184	4148.76	184	1957.23	184	2149.16
185	10222.6	185	8120.56	185	10717.6	185	8948.84	185	5031.61	185	2571.01	185	2422.56	185	3230.59
186	9327.56	186	7499.43	186	10904.8	186	9859.09	186	4304.31	186	2265.55	186	2108.68	186	3085.7
187	6057.35	187	4790.85	187	10531.3	187	9485.34	187	2973.68	187	1754.68	187	1949.63	187	2960.43
188	6244	188	4524.22	188	11835.8	188	10894	188	4387.36	188	3361.38	188	3719.14	188	2913.5
189	6916.9	189	5048.26	189	12750.4	189	11948.9	189	4636.11	189	4427.04	189	3840.93	189	2665.83
190	5465.21	190	4622.21	190	12888.9	190	11340.2	190	4161.98	190	3434.74	190	4106.98	190	2837.71
191	3472.7	191	2206.74	191	14166	191	11600.8	191	4203.03	191	4500.93	191	3991.11	191	4097.93
192	1942.21	192	641.705	192	14668.5	192	11204.6	192	2906.63	192	4123.47	192	5234.11	192	6229.89
193	1480.44	193	462.328	193	14532	193	11048.4	193	2679.16	193	2804.53	193	5519.69	193	6104.74
194	2126.53	194	840.933	194	14607.2	194	11292	194	2880.87	194	3911.23	194	5044.98	194	5336.85
195	3508.59	195	1500.27	195	14280.2	195	11596.1	195	3839.08	195	4697.83	195	4515.26	195	2916.41
196	3940.21	196	1936.32	196	13260.3	196	9976.92	196	4689.05	196	5589.71	196	3529.64	196	2144.91
197	4260.67	197	2261.6	197	13332.5	197	10617.2	197	3494.48	197	4139.69	197	1789.71	197	1756.73
198	4139.76	198	3083.78	198	11580.9	198	8520.56	198	6278.26	198	7065.57	198	1617.93	198	2320.92
199	5488.79	199	4545.15	199	10446.7	199	7690.35	199	7181.47	199	7975.86	199	669.012	199	1245.13
200	7473.82	200	6542.12	200	10683.8	200	7182.65	200	6558.86	200	7360.6	200	402.974	200	1575.44
201	8506.92	201	6964.05	201	10408.5	201	6717.24	201	8137.29	201	9258.5	201	1214.72	201	2407.22
202	8690.77	202	5578.88	202	8607.47	202	6521.18	202	7604.87	202	8449.9	202	2113.09	202	4239.88
203	7335.24	203	4250.48	203	7632.94	203	6085.87	203	7327.53	203	6847.14	203	2489.52	203	4464.57
204	6054.37	204	3397.57	204	6755.27	204	5589.03	204	6624.08	204	6233.27	204	3101.49	204	5893.92
205	6234.03	205	4240.14	205	6529.19	205	5474.98	205	4807.49	205	4674.2	205	4105.43	205	7810.22
206	6457.99	206	4876.05	206	6565.04	206	5529.04	206	4125.39	206	3837.57	206	5839.64	206	9531.01
207	6056.36	207	4264.99	207	5760.91	207	5381.18	207	2946.58	207	2722.07	207	6193.89	207	8042.42
208	5512.32	208	4635.95	208	6400.68	208	5565.55	208	1872.56	208	1704.46	208	6639.68	208	8899.66
209	4475.21	209	3738.96	209	6869.16	209	6509.08	209	1136.08	209	1362.42	209	5767.99	209	6821.75
210	5130.41	210	4552.25	210	6808.77	210	6790.13	210	610.443	210	642.734	210	5998.59	210	6386.25
211	5753.43	211	4806.2	211	6950.44	211	6939.64	211	1300	211	1360.19	211	7284.2	211	6447.29
212	5319.44	212	3931.62	212	6426.71	212	6185.3	212	2749.1	212	2618.16	212	7869.32	212	7010.88
213	5256.75	213	3798.08	213	6000.2	213	5142.5	213	4158.33	213	3528.83	213	7523.45	213	5443.33
214	4819.57	214	3382.44	214	5976.32	214	5112.67	214	3541.32	214	2970.42	214	6733.19	214	4224.07
215	5371.05	215	3940.18	215	6550.41	215	5707.4	215	4067.54	215	3062.02	215	5602.27	215	3577.1
216	5771.56	216	3675.91	216	5513.02	216	5084.48	216	5361.74	216	3662.15	216	4918.62	216	2662.98
217	5208.33	217	3581.47	217	4803.5	217	4707.93	217	5138.21	217	3554.28	217	4640.81	217	2850.83
218	4840.18	218	3771.72	218	6071.87	218	5406.52	218	3984.54	218	2673.38	218	4357.22	218	3815.36
219	5091.27	219	4066.16	219	6892.51	219	4750.2	219	3317.9	219	2642.09	219	3705	219	2562
220	4033.09	220	3190.5	220	5577.75	220	4796.99	220	2230.93	220	1834.84	220	4620.56	220	3002.59
221	3535.89	221	2488.15	221	5469.43	221	4770.76	221	2832.31	221	3326.5	221	5310.1	221	4387.32
222	3011.71	222	2060.73	222	5686.03	222	4541.14	222	2684.85	222	2967.57	222	5567.89	222	4041.43
223	2278.7	223	1512.88	223	4993.07	223	4290.65	223	3179.97	223	3831.1	223	4981.64	223	3695.12
224	2721.86	224	1464.3	224	5142.96	224	4513.53	224	5216.01	224	6357.56	224	5001.99	224	4423.71
225	2657.9	225	1450.38	225	5811.39	225	4826.91	225	4759.11	225	5154.56	225	5391.15	225	4472.6
226	5256.36	226	3199.54	226	5958.64	226	5002.53	226	6412.75	226	6233.59	226	5824.03	226	3889.68
227	6909.39	227	5548.08	227	6552.6	227	4774.86	227	5943.25	227	6418.46	227	5267.45	227	3585.17
228	5811.3	228	3960.84	228	9049.58	228	6472.79	228	4548.47	228	5098.14	228	4371.31	228	3618.34
229	7151.86	229	5398.17	229	8346.17	229	5272.37	229	3095.97	229	3467.44	229	2814.75	229	2310.3
230	7294.06	230	5716.63	230	8223.99	230	5207.1	230	1940.11	230	2744.09	230	2521	230	2127.23
231	6648.43	231	5287.3	231	7655.43	231	4896.4	231	1716.76	231	1818.55	231	3093.81	231	2711.02
232	6537.27	232	5609.52	232	8882.73	232	5989.28	232	478.537	232	1447.36	232	4501.17	232	2985.28
233	7130.44	233	5633.46	233	8234.47	233	5211.62	233	2493.6	233	2491.19	233	4674.69	233	3730.95
234	5443.13	234	4221.54	234	8179.83	234	5239.51	234	1869.25	234	1970.81	234	4659.71	234	5128.1
235	4650.85	235	3588.5	235	9017.29	235	5836.92	235	4180.16	235	3959.16	235	4982.43	235	5948.48
236	3678.28	236	2800.19	236	10029.7	236	7527	236	4285.28	236	5119.45	236	5051.67	236	5446.77
237	3600.03	237	2869.37	237	10776.8	237	8767.03	237	4962.71	237	5259.89	237	4906.79	237	4468.16
238	2623.36	238	2344.58	238	11619.4	238	9416.55	238	4046.69	238	4270.93	238	3887.52	238	5163.15
239	2428.52	239	1836.35	239	11690.3	239	9066.66	239	2539.4	239	2651.87	239	4458.99	239	6065.57
240	2219.47	240	1510.66	240	10718.4	240	8267.21	240	1741.93	240	2264.14	240	4474.12	240	5350.74
241	2073.79	241	1369.52	241	10000.2	241	8247.54	241	1703.12	241	1702.52	241	4391.2	241	3643.15
242	1803.24	242	1107.08	242	9947.23	242	8621.52	242	1916.51	242	2086.78	242	4774.57	242	5140.14
243	1918.53	243	1097.9	243	9106.91	243	7693.45	243	2623.31	243	2490.77	243	3446.7	243	4418.2
244	1682.57	244	749.514	244	7297.35	244	6951.59	244	4939.42	244	3730.26	244	2587.43	244	3742.73
245	1182.63	245	551.602	245	6706.65	245	6190.12	245	6830.95	245	5784.82	245	2121.57	245	2809.77
246	1252.61	246	670.864	246	6310.22	246	5660.68	246	6031.13	246	4184.49	246	1977.54	246	2530.67
247	945.102	247	437.831	247	5745.98	247	5248.34	247	6758.77	247	4937.42	247	1786.93	247	2912.67
248	573.661	248	339.971	248	5955.16	248	4329.11	248	7927.46	248	4324.75	248	2931.77	248	3553.2
249	423.509	249	204.024	249	8466.61	249	6389.81	249	7761.4	249	3983.32	249	3640.05	249	3390.65
250	506.036	250	404.386	250	7116.31	250	5477.25	250	6122.43	250	2888.66	250	5165.59	250	4683.61
251	434.536	251	426.341	251	6755.85	251	4958.07	251	7022.48	251	4126.58	251	6761.44	251	5271.97
252	425.285	252	376.245	252	6466.68	252	4559.31	252	5054.49	252	3429.98	252	7962.23	252	6760.06
253	438.16	253	322.539	253	6769.81	253	4935.56	253	4079.68	253	2724.47	253	7118.45	253	6516.75
254	424.027	254	588.999	254	8213.64	254	6166.79	254	2923.32	254	2788.01	254	4138.97	254	4340.25
255	683.308	255	744.643	255	7463.64	255	5518.61	255	3443.82	255	3001.12	255	3058.58	255	2935.04
256	809.302	256	898.166	256	7076.78	256	5637.72	256	2071.17	256	2039.15	256	2385.44	256	1962.29
257	1068.58	257	1208.41	257	6404.41	257	5233.48	257	1904.48	257	1932.04	257	4290.91	257	2142.5
258	1442.07	258	2045.06	258	6256.8	258	4805.34	258	1752.69	258	2718.36	258	6877.31	258	4085.31
259	1275.35	259	1653.48	259	6682.88	259	5758.65	259	2541.8	259	3489.6	259	8979.39	259	5470.09
260	1805.19	260	2770.95	260	6060.28	260	4851.87	260	4114.4	260	4906.89	260	8467.54	260	5550.44
261	1570.44	261	2394.79	261	6931.83	261	5756.01	261	5044.11	261	5196.51	261	8474.67	261	6527.31
262	2035.65	262	2889.69	262	5276.26	262	4311.27	262	4794.77	262	4732.57	262	5954.61	262	4386.66
263	1742.99	263	2315.07	263	5133.22	263	4263.89	263	4067.31	263	4038.91	263	6294.13	263	5508.77
264	2150.78	264	2937.23	264	4711.03	264	4446.22	264	4102.12	264	4276.15	264	4651.77	264	3784.71
265	3076.85	265	4371.79	265	5721.94	265	6323.4	265	4700.37	265	4994.94	265	5463.95	265	5011.01
266	2512.24	266	3570.64	266	7571.94	266	7632.68	266	5875.01	266	5713.95	266	4398.6	266	4366.1
267	2561.15	267	2905.32	267	8491.02	267	7141.83	267	5229.81	267	3843.65	267	4777.66	267	2855.72
268	2227.74	268	2262.62	268	7628.57	268	5521.72	268	7006.75	268	6663.99	268	5413.62	268	3058.44
269	3398.9	269	3561.03	269	7725.11	269	4792.02	269	7839.28	269	6136.43	269	7463.75	269	3760.68
270	2656.54	270	2441.63	270	6235.28	270	4009.79	270	12315.4	270	9703.01	270	8379.24	270	4825.48
271	2917.76	271	2344.53	271	5165.94	271	3507.1	271	10101.2	271	7577.22	271	10499.8	271	8932
272	3100.02	272	3154.23	272	5053.64	272	3827.49	272	9933.93	272	7342.88	272	11461.1	272	10273.1
273	2674.55	273	2570.31	273	6975.93	273	6475.85	273	8214.43	273	6185.32	273	12408.5	273	10989.9
274	2520.62	274	2187.77	274	6300.56	274	5526.23	274	6478.9	274	5760.49	274	10901.8	274	9603.68
275	2894.89	275	2476.12	275	6644.85	275	5755.76	275	6795.41	275	5057.67	275	10163.9	275	8065.74
276	2975.44	276	1924.75	276	6889.06	276	5336.85	276	4988.62	276	4901.11	276	8826.29	276	8364.57
277	2414.68	277	1492.47	277	7227.66	277	6036.27	277	6101.96	277	4678.33	277	8290.67	277	8548.46
278	2521.51	278	1717.41	278	8017.23	278	6576.6	278	5695.81	278	5893.2	278	9161.32	278	8255.23
279	2305.32	279	1466.21	279	7753.49	279	7218.24	279	6149.77	279	5069.64	279	8439.07	279	7710.63
280	2363.59	280	1326.41	280	7966.87	280	7662.92	280	6674.73	280	5822.35	280	8919.28	280	6301.35
281	2131.92	281	1481.23	281	7800.13	281	7034.82	281	6475.33	281	5467.14	281	8887.46	281	5767.95
282	1936.69	282	1243.25	282	6424.94	282	5829.68	282	6075.56	282	5095.06	282	8501.01	282	5909.12
283	2247.86	283	2737.42	283	5702.03	283	5146.77	283	5865.96	283	4426.88	283	7806.7	283	5382.05
284	2086.27	284	2311.47	284	5741.65	284	4945.93	284	5459.48	284	4649.93	284	7227.37	284	4559.4
285	2163.24	285	2531.34	285	6088.47	285	4778.93	285	5802.91	285	4860.26	285	5803.42	285	3694.38
286	3189.19	286	3691.72	286	5588.91	286	4489.01	286	5146.09	286	4065.21	286	5300.06	286	3291.25
287	2962.31	287	3307.35	287	6222.64	287	5162.59	287	4719	287	4112.04	287	5066.87	287	3168.79
288	4553.59	288	4881.28	288	5099.87	288	3906.64	288	3944.18	288	3642.1	288	3672.64	288	2104.43
289	4941.85	289	4440.52	289	4925.7	289	3644.42	289	3572.2	289	3409.76	289	3925.67	289	3322.11
290	5061.15	290	4498.6	290	4606.87	290	3630.68	290	2789.37	290	2459.24	290	4435.7	290	4980.79
291	4969.9	291	5043.08	291	4914.03	291	4123.97	291	2370.45	291	2069.91	291	3393.57	291	4555.17
292	3659.91	292	3095.32	292	4574.41	292	3843.26	292	2491.89	292	2168.92	292	4168.46	292	5109.63
293	3591.55	293	3059.87	293	4396.2	293	3455.19	293	2629.91	293	2085.23	293	2602.37	293	4111.47
294	3516.38	294	2883.21	294	4072.69	294	3021.44	294	1869.79	294	1769.23	294	2518.87	294	3516.61
295	4651.87	295	4797.97	295	3878.89	295	3003.12	295	2485.37	295	2499.42	295	654.855	295	3289.77
296	5970.75	296	6735.66	296	3786.94	296	4025.94	296	2227.32	296	1943.4	296	795.684	296	3161.32
297	6848.09	297	7097.51	297	4381.67	297	4787.76	297	1366.8	297	1625.32	297	1141.81	297	3519.68
298	6004.15	298	5445.44	298	4545.96	298	4463.19	298	1255.88	298	2219.71	298	2094.6	298	5228.19
299	4389.22	299	3586.49	299	5351.85	299	4968.81	299	1724.77	299	2431.54	299	5046.91	299	6755.94
300	4333.44	300	3766.68	300	5157.21	300	4882.19	300	1818.05	300	3021.82	300	6765.17	300	7496.49
301	4774.9	301	3646.43	301	5566.76	301	4857.01	301	2294.77	301	3633.2	301	7681.41	301	7870.65
302	6937.13	302	5773.43	302	5528.26	302	4705.84	302	3252.36	302	4255.57	302	5337.79	302	5442.94
303	5201.84	303	5404.75	303	5866.78	303	5665.93	303	4962.3	303	4801.55	303	3331.72	303	2665.52
304	4701.95	304	5389.39	304	7453.17	304	6989.62	304	5214.77	304	4977.5	304	3124.15	304	2476.66
305	5086.75	305	4962.46	305	8963.36	305	7434.52	305	4951.89	305	5021.88	305	3673.2	305	3202.18
306	6142.98	306	4468.59	306	9653.4	306	7297.6	306	5284.8	306	4879.45	306	3365.73	306	3173.92
307	6598.79	307	5163.84	307	8458.61	307	6587.15	307	5715.05	307	4777.22	307	3522.76	307	3753.24
308	6185.16	308	3894.49	308	7197.83	308	5934.61	308	5236.87	308	4958.91	308	4143.65	308	4654.38
309	4808.83	309	3050.48	309	8685.85	309	7270.81	309	4612.67	309	4345.32	309	4906.88	309	6520.58
310	3905.17	310	2251.08	310	9386.92	310	6794.83	310	5413.6	310	5322.09	310	5025.77	310	6017.23
311	3468.64	311	2092.86	311	9149.73	311	6995.31	311	4487.75	311	4862.23	311	4331.11	311	5615.1
312	2519.76	312	1388.3	312	10093.4	312	7944.62	312	4049.19	312	3889.44	312	4318.3	312	5081.93
313	1481.15	313	666.399	313	7627.63	313	7084.47	313	2823.98	313	3536.85	313	3942.5	313	5134.72
314	1968.85	314	1240.29	314	8872.06	314	8456.58	314	2534.89	314	2945.06	314	3828.04	314	5183.61
315	1200	315	766.833	315	8979.52	315	8694.51	315	1674.51	315	2427.1	315	3994.49	315	4664.85
316	1322.73	316	827.169	316	8707.7	316	8395.84	316	1565.13	316	2719.97	316	3733.68	316	4446.84
317	939.484	317	524.868	317	8535.72	317	7962.75	317	2879.44	317	4104.9	317	4652.78	317	4332.83
318	2039.69	318	1208.08	318	7949.51	318	7015.15	318	2449.72	318	4173.14	318	4329.37	318	3436.09
319	1638.78	319	859.688	319	6992.07	319	6218.92	319	3697.37	319	5150.1	319	7692.17	319	5095.69
320	1766.04	320	572.821	320	5952.59	320	5213.71	320	3732.37	320	3828.62	320	6816.59	320	4733.09
321	2216.06	321	900.511	321	5684.77	321	5270.77	321	3413.38	321	3483.33	321	8032.54	321	6841.78
322	1345.65	322	706.349	322	5372.73	322	5348.54	322	2720.39	322	3173.52	322	9275.26	322	9418.72
323	751.761	323	454.899	323	5462.69	323	5387.69	323	2864.47	323	2932.25	323	10917.4	323	11499.5
324	1343.28	324	805.305	324	5670.73	324	5718.07	324	6232.73	324	4630.56	324	10534.7	324	10621.5
325	1692.76	325	888.34	325	5678.6	325	5970.48	325	5847.35	325	4197.66	325	10554.1	325	10011.7
326	1693.47	326	1226.78	326	6582.92	326	5945.19	326	9555.05	326	6133.46	326	9548.03	326	8692.45
327	3983.35	327	3502.81	327	7383.11	327	6897.11	327	9510.73	327	6441.83	327	10556.5	327	9501.91
328	3363.59	328	3695.55	328	6906.09	328	6369.94	328	11927.8	328	8903.47	328	11047.4	328	7917.92
329	4636.54	329	5238.8	329	7157.94	329	6525.3	329	14100	329	11949.1	329	11290	329	6981.9
330	5095.02	330	5319.74	330	7028.93	330	5834.06	330	15670	330	13670.6	330	10967.6	330	7701.08
331	4187.67	331	3438.49	331	7174.12	331	5343.44	331	13393.8	331	12215.6	331	10092.7	331	6932.76
332	2813.61	332	2279.84	332	6563.9	332	5369.69	332	13727.1	332	10882.6	332	10038	332	7292
333	2365.33	333	1998.96	333	6591.12	333	4945.86	333	11770.5	333	8615.68	333	8400.65	333	6827.16
334	3121.32	334	2865.62	334	6201.55	334	4700.61	334	8828.77	334	7476.24	334	7504.37	334	6111.5
335	3642.82	335	4401.03	335	5932.5	335	4623.97	335	7507.69	335	7031.1	335	5764.65	335	6129.99
336	3922.59	336	4830.11	336	5383.15	336	3862.86	336	7399.42	336	7615.01	336	5601.98	336	6285.18
337	4125.91	337	5135.84	337	5167.45	337	4438.66	337	7750.99	337	8525.53	337	6169.99	337	7587.55
338	4458.95	338	5449.62	338	5325.99	338	4367.33	338	8543.51	338	8743.48	338	5254.13	338	7133.18
339	5046.83	339	6650.21	339	5635.62	339	4504.08	339	9362.1	339	10066.4	339	5542.35	339	6348.4
340	5874.98	340	7282.18	340	6250.58	340	4579.72	340	8750.92	340	9791.3	340	5827.89	340	6747.9
341	6860.9	341	7480.05	341	7284.93	341	4993.98	341	9515.19	341	9771.39	341	4002.76	341	4964.95
342	8483.17	342	8316.85	342	8453.83	342	6000.11	342	9818.87	342	9444.2	342	3464.58	342	4226.81
343	9494	343	9043.48	343	9050.67	343	6648.24	343	8889.88	343	7921.21	343	2896.37	343	4298.7
344	10291.6	344	9570.17	344	8662.13	344	6789.74	344	6585.57	344	6677.34	344	2820.89	344	4372.05
345	9610.75	345	8551.06	345	8399.81	345	6248.96	345	6070.64	345	6835.33	345	3740.07	345	4737.14
346	9065.9	346	8390.28	346	8148.54	346	6409.48	346	6694.25	346	7339.29	346	4686.61	346	5947.91
347	7098.14	347	7158.61	347	7391.04	347	6392.25	347	8193.3	347	8404.48	347	5675.68	347	6058.89
348	6383.61	348	6818.74	348	6505.89	348	5447.1	348	9673.26	348	9243.91	348	5095.76	348	5160.4
349	6180.95	349	6406.05	349	6241.4	349	4887.78	349	8741.9	349	7326.92	349	3962.68	349	5049.23
350	5811.71	350	5674.87	350	4807.82	350	3529.11	350	9407.58	350	8829.16	350	3624.41	350	4336.01
351	5733.71	351	4985.41	351	3516.8	351	2505.48	351	9142.28	351	7739.42	351	3582.56	351	4005.51
352	6802.89	352	5382.23	352	4533.94	352	3049.94	352	6967.64	352	6546.1	352	3600.79	352	4002.47
353	6157.49	353	4273.65	353	3932.98	353	2760.41	353	8527.97	353	7930.03	353	3673.79	353	3215.3
354	6945.74	354	5184.75	354	4007.27	354	3046.47	354	8089.26	354	7272.83	354	4617.28	354	4517.39
355	8033.23	355	6097.81	355	4260.51	355	3614.87	355	8966.64	355	7795.73	355	5444.83	355	5182.48
356	5880.04	356	3946.62	356	4816.73	356	3269.01	356	8334.4	356	7685	356	6992.96	356	7111.24
357	5000.93	357	3054.56	357	3618.51	357	2593.34	357	8396.88	357	8165.73	357	6332.59	357	6419.64
358	4987.4	358	3267.31	358	3600.18	358	2458.96	358	9795.92	358	9403.22	358	7727.4	358	8607.11
359	5146.1	359	3957.24	359	3878.84	359	2505.54	359	10094.5	359	8643.32	359	7799.81	359	8338.2
360	5127.24	360	4333.8	360	3656.07	360	1819.67	360	10412.1	360	8372.65	360	8292.57	360	9002.56
361	5449.44	361	4382.37	361	3137.25	361	1571.97	361	10443.9	361	8550.18	361	8393.93	361	9479.44
362	6776.25	362	4481.39	362	2897.38	362	1859.6	362	10203.4	362	7974.13	362	8491.76	362	9860.59
363	9282.05	363	5972.97	363	2983.18	363	2279	363	7975.96	363	7150.27	363	8150.66	363	8689.79
364	11024.4	364	8408.05	364	3519.37	364	2854.11	364	7042.43	364	7560.29	364	7584.09	364	7726.59
365	9461.79	365	8675.68	365	3819	365	2966.27	365	7159.64	365	6936.89	365	7310.62	365	7617.83
366	5753.87	366	6185.42	366	4365.34	366	3297.68	366	5905.65	366	7259.82	366	6192.5	366	6232.39
367	3284.44	367	3562.64	367	3408.93	367	2526.38	367	6312.49	367	8261.4	367	6523.55	367	7288.37
368	3756.12	368	4386.26	368	3968.5	368	3131.42	368	6908.79	368	7973.62	368	6181.87	368	7237.73
369	8564.25	369	8891.39	369	3043.78	369	2759.5	369	7157.58	369	6993.1	369	6155.2	369	6826.8
370	7900.77	370	8036.18	370	4306.42	370	4303.66	370	8832.22	370	7738.69	370	7761.4	370	9434.31
371	7461.89	371	6904.39	371	5199.37	371	5141.9	371	9968.8	371	7474.17	371	8259.27	371	9960.42
372	7406.06	372	6530.53	372	5947.62	372	4966.31	372	8974.78	372	6522.78	372	9430.85	372	11091.5
373	7109.57	373	6829.75	373	6100.09	373	5335.51	373	8554.57	373	5764.22	373	10642.5	373	11901.3
374	6932.04	374	6991.84	374	6131.79	374	5868.45	374	7929	374	5241.79	374	10202.3	374	11655.9
375	6581.23	375	6437.72	375	6205.52	375	5608.81	375	7337.71	375	5123.62	375	12303.4	375	14219.6
376	5951.66	376	5645.88	376	6025.71	376	5437.74	376	7004.08	376	4794.1	376	10331.2	376	12926.8
377	5931.06	377	6695.18	377	6281.13	377	5763.14	377	5953.44	377	4697.91	377	9565.54	377	12160.7
378	6017.28	378	6729.73	378	6502.51	378	5592.86	378	4134.25	378	3172.01	378	9007.55	378	12251.5
379	5263.69	379	5506.8	379	6537.57	379	5239.53	379	3096.45	379	2491.28	379	8141.99	379	12085.9
380	4789.39	380	5982.71	380	6333.51	380	5134.28	380	2103.76	380	1310.47	380	7470.01	380	11616.6
381	3583.88	381	3829.8	381	6597.53	381	5326.39	381	702.775	381	476.926	381	8339.01	381	11645.6
382	3063.34	382	3569.28	382	6142.08	382	4922.41	382	375.108	382	488.066	382	9155.04	382	12615
383	2550.23	383	3943.21	383	6211.06	383	4428.79	383	761.255	383	786.453	383	9620.14	383	11294.4
384	1695.88	384	2435.32	384	5960.51	384	4329.31	384	922.011	384	1198.42	384	9910.14	384	11053.7
385	1411.9	385	1727.28	385	5749.62	385	4358.41	385	820.637	385	1106.69	385	8822.46	385	10131.5
386	1013.65	386	1039.59	386	5455.55	386	4032.06	386	1180.77	386	1595.72	386	8087.86	386	9329.54
387	663.998	387	822.503	387	5422.16	387	3635.74	387	1461.04	387	1564.08	387	6969.28	387	7828.81
388	1408	388	1716.47	388	6532.26	388	5061.07	388	2052.64	388	2595.34	388	7979.66	388	8012.77
389	879.132	389	710.14	389	7452.79	389	7062.32	389	2618.59	389	3125.67	389	7736.39	389	7305.2
390	1052.72	390	890.751	390	9689.07	390	9963.43	390	2316.34	390	3094.75	390	9051.16	390	7368.26
391	1458.5	391	1136.79	391	12175.2	391	11665.9	391	2137.72	391	3275.82	391	12555.5	391	10097.9
392	626.349	392	385.708	392	12147.5	392	10383.7	392	2346.62	392	3117.58	392	10602	392	9482.33
393	579.65	393	885.35	393	11643	393	11142	393	2431.15	393	2580.24	393	12238.5	393	11060.1
394	464.018	394	801.464	394	11264.4	394	10677.9	394	2279.8	394	2219.13	394	14974	394	16064.4
395	219.825	395	386.533	395	10342.8	395	11197.1	395	2925.8	395	2323.54	395	13689.8	395	15884.1
396	1276.19	396	1704.87	396	10166.4	396	9809.36	396	4387.29	396	3241.19	396	11621.4	396	14766.4
397	884.644	397	1410.29	397	8750.89	397	8391.4	397	6200.6	397	4240.69	397	10019	397	12583.8
398	1940.16	398	3132.78	398	8555.74	398	7454.2	398	8358.09	398	5820.98	398	7931.61	398	8663.58
399	3548.87	399	4509.88	399	6919.43	399	5957.33	399	8481.89	399	6036.1	399	8884	399	10584.6
400	3016.08	400	4024.61	400	6156.42	400	5113.17	400	9859.27	400	6533.42	400	10642.6	400	11205.8
401	3343.01	401	3918.92	401	7553.92	401	6159.28	401	12713.8	401	8646.12	401	9897.9	401	9212.21
402	2807.59	402	2669.94	402	8405.62	402	6987.61	402	12789.8	402	9437.95	402	8767.76	402	8758.12
403	2345.45	403	2375.03	403	8407.4	403	7203.7	403	12234.8	403	9063.91	403	8189.16	403	7850.52
404	2290.13	404	1987.35	404	8682.41	404	7067.98	404	13926.2	404	11967.9	404	6906.48	404	5795.65
405	2739.35	405	2038.23	405	10607.8	405	7649.75	405	14829.4	405	13365.8	405	5577.09	405	4463.08
406	3084.97	406	2135.49	406	12913.1	406	10259.6	406	13789.9	406	11091.4	406	6446.23	406	6230.6
407	3607.67	407	2721.7	407	11655.7	407	9522.3	407	13325	407	9965.24	407	5867.9	407	5533.04
408	3510.45	408	3183.84	408	10936.9	408	9237.75	408	11030	408	7988.71	408	5371.43	408	6408.7
409	3156.09	409	2672.95	409	9245.65	409	7605.88	409	8739.27	409	6391.53	409	6052.45	409	7328.8
410	4052.7	410	3260.51	410	6431.61	410	5220.44	410	7693.9	410	5800.94	410	6595.63	410	7672.66
411	3923.84	411	3925.81	411	6044.37	411	5883.71	411	6888.43	411	5439.56	411	10646.4	411	11688.3
412	4755.93	412	4703.23	412	6344.4	412	6134.56	412	7001.99	412	5707.93	412	12410.5	412	12244.5
413	5544.52	413	5551.82	413	6113.67	413	5922.42	413	6883.78	413	5716.13	413	12939.9	413	12048.4
414	5492.15	414	5480.76	414	6080.95	414	5761.8	414	6843.96	414	6407.63	414	13665.4	414	12679.4
415	6718.92	415	6342.8	415	6960.61	415	6630.94	415	7191.6	415	6860.41	415	14063.4	415	12076.4
416	8221.46	416	6791.16	416	8121.83	416	7626.03	416	6872.64	416	7339.79	416	13861.1	416	12348.3
417	7054.98	417	5899.02	417	8780.08	417	7980.09	417	7335.2	417	6925.77	417	13975.3	417	12468.5
418	7028.5	418	6542.55	418	9373.92	418	8019.86	418	8353.88	418	7948.18	418	14905.5	418	14531.5
419	5262.7	419	5290.36	419	9947.63	419	8251.16	419	7400.86	419	7356.09	419	15260.9	419	15505.2
420	4255.35	420	3699.61	420	10820.2	420	8591.89	420	7830.95	420	6575.43	420	15987	420	12838.3
421	3979.1	421	4033.28	421	9879.58	421	7128.28	421	7661.91	421	6332.33	421	15392.3	421	12783.6
422	4359.17	422	4141.63	422	9305.06	422	6362.1	422	6506.34	422	6171.53	422	12082.6	422	8916.46
423	3616.99	423	3618.14	423	7680.51	423	5275.26	423	6675.17	423	6069.69	423	12947.7	423	9653.71
424	3179.39	424	3182.59	424	6428.66	424	3923.67	424	7900.64	424	7178.15	424	8670.1	424	7384.69
425	3206.11	425	2971.9	425	6082.53	425	4195.78	425	9460.22	425	7529.4	425	8888.9	425	7604.06
426	3471.34	426	2965.74	426	6526.09	426	4742.86	426	10722.5	426	8274.65	426	7224.47	426	6716.13
427	3702.62	427	2989.55	427	6530.93	427	4585.74	427	7070.53	427	5280.6	427	6086.32	427	6289.19
428	2187.14	428	2636.61	428	5344.11	428	3262.33	428	7547.3	428	5878.45	428	5668.76	428	7382.56
429	2791.49	429	3115.03	429	5037.72	429	3252.15	429	7238.97	429	5119.04	429	6936.56	429	7334.6
430	2154.66	430	2418.49	430	5276.41	430	3656.79	430	7188.55	430	4578.6	430	4861.34	430	5829.02
431	2004.17	431	2387.21	431	6365.91	431	4121.06	431	7145.58	431	5407.31	431	5982.14	431	5192.99
432	1881.45	432	2410.43	432	6332.44	432	4641.52	432	6579.21	432	5040.29	432	8372.74	432	6608.42
433	1994.78	433	2564.43	433	7103.52	433	4904.71	433	6847.39	433	5267.62	433	9662.61	433	8418.23
434	2005.68	434	2495.86	434	6640.66	434	4297.94	434	7308.38	434	5325.95	434	10055	434	9998.9
435	1939.33	435	2122.5	435	6250.51	435	4032.98	435	8449.7	435	6087.65	435	8153.07	435	8563.73
436	2622.89	436	1547.52	436	7548.47	436	5730.41	436	9944.9	436	8498.92	436	9147.08	436	9234.55
437	3405.85	437	2007.01	437	7440.69	437	5435.2	437	11539	437	10662.4	437	9942.11	437	9315.01
438	3891.51	438	2554.81	438	6731.9	438	4655.11	438	9670.06	438	9945.11	438	8516.06	438	8173.46
439	5254.6	439	3162.36	439	6097.3	439	4658.51	439	9195.4	439	10287.3	439	8638.39	439	8974.08
440	5574.88	440	3401.4	440	5587.88	440	4394.71	440	8590.81	440	12349.1	440	11545.3	440	11320.3
441	5732.69	441	3264.3	441	4679.82	441	3667.51	441	8752.78	441	9147.25	441	11959.8	441	11243.8
442	5258.11	442	3417.48	442	4479.15	442	3268.8	442	7705.33	442	8343.19	442	13588.8	442	12626.1
443	3833.54	443	3054.64	443	4993.05	443	3593.55	443	7994.17	443	6330.09	443	14389.5	443	11145.3
444	3507.86	444	2898.74	444	4682.02	444	3448.41	444	8285.91	444	6490.41	444	14262.1	444	11717.8
445	3639.21	445	2921.31	445	5386.29	445	4225.81	445	10068.2	445	7509	445	12182.4	445	9358.26
446	3836.05	446	3320.65	446	5184.62	446	4115.52	446	10166.7	446	7864.13	446	13192.6	446	11088.6
447	4533.02	447	3885.47	447	6922.75	447	6142.7	447	13309.1	447	9540.11	447	10100.2	447	9169.33
448	6341.15	448	5188.12	448	5701.86	448	4747.31	448	12365.5	448	10752.4	448	8030.74	448	9462.78
449	7385.13	449	5584.9	449	5273.12	449	4300.77	449	13149	449	11437.6	449	7835.51	449	8554.95
450	8024.39	450	6533.91	450	5016.06	450	4076.92	450	11218.9	450	10223.1	450	8101.89	450	8947.81
451	7554.07	451	6162.33	451	5128.83	451	4197.39	451	9346.63	451	8688.37	451	8875.11	451	9047.58
452	8573.47	452	5692.16	452	5089.95	452	4228.67	452	9115.33	452	7308.7	452	8717.81	452	9277.88
453	7812.7	453	5374.1	453	5042.19	453	3920.96	453	8455.84	453	7286.54	453	7732.77	453	8342.97
454	8445.7	454	5696.71	454	5694.93	454	4650.32	454	7881.27	454	6467	454	5802.64	454	5173.74
455	8772.42	455	6796.94	455	5900.41	455	4654.39	455	7715.26	455	7161.21	455	5634.55	455	3441.7
456	8159.04	456	6098.54	456	5831.1	456	5046.2	456	6974.27	456	7056.99	456	6370.04	456	4659.85
457	8302.12	457	5969.45	457	5597.65	457	4883.12	457	3953.44	457	3669.13	457	6302.24	457	4637.29
458	8394.36	458	5144.16	458	4928.2	458	3809.71	458	5518.51	458	5088.68	458	7177.61	458	6056.99
459	8285.51	459	4465.94	459	4390.72	459	3534.3	459	6910.56	459	5442.34	459	6221.84	459	5958.65
460	8503.72	460	4076.22	460	4703.78	460	4096.36	460	5594.25	460	3369.61	460	6073.33	460	4810.97
461	6901.32	461	3062.55	461	5114.36	461	4662.16	461	6445.13	461	3617.53	461	6696.92	461	4603.58
462	4952.3	462	2400.4	462	5570.56	462	5196.88	462	6265.13	462	4413.77	462	6512.24	462	4672.85
463	2842.79	463	1312.38	463	6281.47	463	5897.3	463	8203.96	463	6284.34	463	4869.88	463	3577.07
464	2952.79	464	1358.72	464	7308.75	464	6543.99	464	9729.21	464	10152.6	464	4005.44	464	3309.93
465	912.237	465	548.254	465	8577.02	465	7830.5	465	5725.84	465	4614.05	465	2906.18	465	3264.7
466	1600.46	466	871.348	466	6804.65	466	5976.31	466	4764.88	466	3788.15	466	4511.76	466	5254.32
467	1807.62	467	956.923	467	7779.77	467	7089.63	467	6322.77	467	3329.95	467	4288.65	467	4547.25
468	2731.87	468	1459.66	468	8799.45	468	8089.73	468	7809.5	468	3766.57	468	4528.41	468	4587.6
469	2202.36	469	1200.1	469	7706.56	469	7207.91	469	9410.62	469	6211.96	469	3600.17	469	3609.58
470	1555.92	470	1338.62	470	7817.88	470	7352.69	470	9076.09	470	6383.35	470	4316.25	470	2998.47
471	2114.7	471	1632.33	471	7827.16	471	7745.81	471	11941.6	471	9162.64	471	6758.79	471	4009.63
472	2471.36	472	1684.28	472	7111.41	472	6636.74	472	14070	472	11292.3	472	9948.95	472	6527.02
473	3042.83	473	1236.23	473	6814.2	473	5751.25	473	13021.1	473	9984.27	473	7215.6	473	4322.23
474	2491.51	474	888.388	474	7771.06	474	6610.36	474	12207.1	474	8575.38	474	12367.5	474	7832.86
475	2143.92	475	882.068	475	6606.96	475	4829.46	475	11758.7	475	9074.65	475	13772.4	475	10186.2
476	3144.56	476	1636.49	476	7072.31	476	5143.42	476	12667.3	476	10812.7	476	13858.4	476	9345.19
477	4702.45	477	3107.55	477	6457.86	477	4307.35	477	12839.8	477	10755.4	477	12249.9	477	8217.81
478	3104.26	478	2067.72	478	6676.27	478	4426.09	478	14369.9	478	10875.7	478	11823.8	478	8905.33
479	4409.06	479	2834.18	479	6423.16	479	4518.17	479	14380.2	479	10180.4	479	11704.2	479	8303.06
480	6351.06	480	4032.28	480	6395.06	480	4723.53	480	14386.6	480	10572.1	480	10986.1	480	7427.24
481	5292.75	481	2856.84	481	6722.38	481	4925.92	481	10700.6	481	9371.05	481	10215.4	481	7947.69
482	5266.73	482	2966.68	482	6949.84	482	4886.99	482	7620.9	482	7406.37	482	11172.2	482	9671.42
483	6403.28	483	3818.47	483	7528.59	483	5297.24	483	3217.66	483	3656.02	483	11784.9	483	10132.9
484	7772.75	484	4733.22	484	8094.13	484	6445.29	484	1502.25	484	1544.61	484	13787.4	484	10427.6
485	6737.42	485	4458.47	485	8723	485	7053.63	485	1560.17	485	1596.56	485	14140.7	485	13088.3
486	6430.45	486	4709.05	486	8302.75	486	6513.39	486	2599.63	486	2219.75	486	14831.9	486	12577.5
487	5182.69	487	4506.29	487	8515.57	487	6646.21	487	4215.96	487	4012.98	487	15291.3	487	12313
488	5366.85	488	4813.78	488	8519.1	488	6532.85	488	7670.14	488	6432.36	488	18944.6	488	16642.8
489	3760.98	489	4229.91	489	8292.57	489	5955.95	489	8953.31	489	5720.15	489	13822.9	489	15439.2
490	3192.8	490	3445.23	490	8566.86	490	6694.29	490	7130.42	490	2431.78	490	11056.6	490	12748.1
491	2783.92	491	2093.58	491	8510.92	491	6651.2	491	4228.54	491	1526.38	491	8075.65	491	10444.1
492	3135.8	492	2852.18	492	8312.15	492	6533.52	492	4155.06	492	2033.89	492	9839.49	492	9008.7
493	3892	493	3122.22	493	7873.67	493	5995.51	493	5129.29	493	2713.82	493	9496.98	493	7050.55
494	3708.81	494	3687.21	494	7774.76	494	5197.65	494	7159.75	494	3976.98	494	8854.32	494	6535.5
495	3000.08	495	2692.7	495	7316.97	495	5165.78	495	8879.87	495	6517	495	9002.15	495	6625.03
496	1922.66	496	1602.35	496	7179.53	496	5105.12	496	9590.93	496	7166.61	496	10866	496	8197.01
497	3283.9	497	1383.04	497	7027.57	497	5109.47	497	8438.22	497	6907.87	497	12636.5	497	9604.65
498	6100.02	498	3505.53	498	7321.24	498	5354.28	498	9962.85	498	6998.6	498	12958	498	10198.3
499	8930.31	499	5623.36	499	7237.81	499	5460.11	499	9004.39	499	6381.47	499	12583.5	499	8296.2
500	12171.7	500	10181.4	500	7361.78	500	5626.05	500	9397.63	500	5438.84	500	11120.4	500	8867.06
501	12576.7	501	11665.4	501	7525.5	501	5992.97	501	10583.6	501	7254.9	501	11353.4	501	9482.82
502	12946.6	502	10960.3	502	7291.41	502	6116.12	502	10744.5	502	8975.94	502	13285.9	502	11177.1
503	13641	503	12078.6	503	7316.63	503	5828.83	503	11279.6	503	10604.8	503	14840	503	11920.8
504	13785.8	504	12726.3	504	7291.99	504	5689.57	504	14065.9	504	12164.5	504	14749.2	504	11422.6
505	13847.6	505	12208.3	505	6903.11	505	5136.59	505	12039.5	505	11472.6	505	16252.9	505	10789.8
506	12812.4	506	11432.6	506	7678.38	506	5839.1	506	11381.8	506	9982.96	506	14488.5	506	10076.9
507	11519.5	507	10292	507	7527.99	507	5532.61	507	13957.6	507	10621.7	507	13021.1	507	10249.3
508	11944.3	508	10947.6	508	9006.29	508	7057.56	508	15499.9	508	12564.9	508	14186.3	508	10821.7
509	10539.9	509	9535.65	509	8992.94	509	6183.33	509	12050.5	509	10370.3	509	15434.3	509	12149.7
510	9541.37	510	8026.53	510	9414.64	510	6254.82	510	14930.5	510	13124.1	510	14837.1	510	11297.3
511	9488.07	511	8022.13	511	8887.34	511	5851.93	511	13441.9	511	11826.5	511	16135.8	511	11949.1
512	9784.01	512	7935.68	512	8191.45	512	6083.07	512	13683.4	512	13824.1	512	14580.9	512	11076.3
513	10007.1	513	8031.31	513	8839.93	513	7243.11	513	11324	513	11952.3	513	15028.7	513	12134.4
514	8301.7	514	7094.57	514	9197.61	514	7719.94	514	10984.5	514	11539.5	514	14923.7	514	12072.7
515	8806.42	515	6627.52	515	8575.13	515	6917.6	515	10527.7	515	11527.1	515	15369.9	515	11567.9
516	8599.78	516	6536.52	516	7948.79	516	6156.51	516	7188.25	516	8767.47	516	14265.2	516	9501.5
517	9617.55	517	7791.48	517	7254.16	517	5598.01	517	7992.14	517	6716.16	517	14972.1	517	10075.8
518	10559.1	518	9121.67	518	6813.1	518	5173.64	518	9323.34	518	7895.39	518	14242.4	518	11331.6
519	11542.9	519	9370.91	519	6396.44	519	4697.21	519	9887.96	519	8501.81	519	13141.2	519	9848.79
520	11549.1	520	9325.39	520	5846.84	520	4008.78	520	10298.2	520	9157.6	520	11824.1	520	9299.45
521	11357.3	521	9134.6	521	6412.11	521	4288.58	521	9437.96	521	8847.7	521	9751.24	521	8614.01
522	9554.29	522	6521.7	522	7709.28	522	4910.25	522	8917.87	522	8794.82	522	8900.37	522	8482.25
523	8492.48	523	5979.21	523	8699.6	523	6228.79	523	9376.98	523	8574.24	523	9048.98	523	8850.74
524	8504.33	524	6628.87	524	7782.67	524	6273.66	524	9082.02	524	7381.85	524	9405.98	524	9009.75
525	9734.59	525	7448.82	525	6665.06	525	5023.73	525	8436.63	525	6006.52	525	10698.5	525	10883.5
526	8966.71	526	7963.25	526	8240.2	526	5691.17	526	9956.57	526	7627.78	526	12776	526	13616
527	7494.36	527	5310.53	527	10153.3	527	7403.28	527	12059.8	527	8633.97	527	13122	527	13698.8
528	5787.89	528	5217.11	528	12908.7	528	10343.7	528	13130.2	528	9806.62	528	13323.1	528	11591.6
529	5354.15	529	5114.52	529	14785.3	529	13242.4	529	12816.3	529	9707.13	529	12441.5	529	11029.8
530	5467.11	530	5017.17	530	14089.5	530	12982.8	530	10333.6	530	8595.88	530	12959.3	530	10880.8
531	5028.26	531	4049.79	531	13273.7	531	12003.3	531	11128.8	531	8992.89	531	12701.7	531	10489.1
532	5621.66	532	3928.01	532	11683.3	532	9989.92	532	10321.5	532	7134.57	532	13171	532	11145
533	6114.8	533	3874.99	533	13214	533	11540.6	533	11860.5	533	7781.86	533	14686.6	533	11244.5
534	6399.52	534	4674.66	534	14155	534	11220.4	534	11535.9	534	6021.49	534	13831.4	534	10908
535	7204.05	535	5331.61	535	12686.3	535	9649.23	535	12425.9	535	7270.81	535	14229.8	535	12428.5
536	6713.04	536	5353.76	536	13484.1	536	10429.6	536	13845.2	536	9359.23	536	14315.2	536	13206.1
537	6537.38	537	5810.49	537	12392.6	537	9174.46	537	14615.9	537	11283.8	537	13522.9	537	12819.6
538	7487.11	538	6161.11	538	11774.6	538	8382.33	538	13856.8	538	12092.9	538	13990.8	538	12773.4
539	5887.95	539	5683.35	539	11383.3	539	8060.23	539	13810.1	539	12366.5	539	11414.6	539	10365.8
540	7304.18	540	6454.95	540	10162.1	540	7275.65	540	12441.3	540	10484	540	10677.2	540	10516.2
541	5730.18	541	5340.82	541	7894.54	541	5396.01	541	7414.03	541	7236.8	541	13435.3	541	13063.2
542	5755.18	542	4833.61	542	8617.12	542	6181.88	542	10569.6	542	8318.15	542	13198.9	542	13169.5
543	6571.8	543	5491.2	543	6804.86	543	4776.77	543	12965.5	543	10868.5	543	14433	543	14095.2
544	7195.81	544	5182.14	544	5479.44	544	3528.21	544	7989.52	544	6288.13	544	13740.8	544	11822.3
545	7609.69	545	5771.53	545	7028.66	545	5257.78	545	11997.1	545	8895.07	545	12799.6	545	11898.4
546	7778.22	546	6433.11	546	7873.5	546	5909.15	546	9935.4	546	6779.85	546	11898.3	546	12330
547	7145.11	547	5983.1	547	6590.65	547	4996.23	547	13711.7	547	10039.3	547	11791.6	547	12002.5
548	6155.59	548	5049.94	548	6843.62	548	5152.61	548	16733.4	548	13160.7	548	11668.5	548	12732.4
549	5482.69	549	4479.01	549	7449.65	549	6203.48	549	17433.1	549	13391.1	549	11636.3	549	11165.9
550	4935.43	550	3696.44	550	7838.65	550	6731.32	550	17600.4	550	13008.2	550	14826.3	550	15242.7
551	4120.94	551	3458.8	551	8063.32	551	7105.99	551	16483.3	551	12142.8	551	13597.4	551	13223.3
552	4664.5	552	3811.75	552	8215.85	552	7155.92	552	18150.8	552	13766	552	15397.7	552	14034.2
553	5035.87	553	3515.84	553	8118.56	553	6856.54	553	17809.4	553	13683	553	14753.4	553	14822.1
554	4762.48	554	3550.41	554	8473.81	554	6138.47	554	17061.9	554	13576.6	554	14926.4	554	13124
555	5237.94	555	3583.09	555	8175.48	555	5671.42	555	17963.7	555	13658.2	555	14978.2	555	11723
556	3658.24	556	2318.35	556	8142.24	556	5950.21	556	17439.4	556	12466.7	556	12750.8	556	10671.9
557	2860.82	557	1556.82	557	8117.9	557	5926.2	557	13161.6	557	9665.13	557	13768.7	557	11486.4
558	2638.13	558	1490.8	558	9194.29	558	7301.9	558	13417.7	558	10605.1	558	11231.5	558	9836.67
559	3016.17	559	1838.27	559	8835.42	559	7481.21	559	12765.7	559	11351.9	559	11112.5	559	10923.6
560	1204.82	560	883.503	560	8652.8	560	7802.35	560	11794	560	11424.9	560	12994.9	560	12825.8
561	1324.05	561	1396.85	561	8359.33	561	7841.59	561	11028.5	561	10806.6	561	11852.3	561	11849.2
562	1719.04	562	1770.76	562	8901.99	562	8249.44	562	9528.57	562	8948.81	562	10817.9	562	10474.7
563	1604.99	563	1632.21	563	9752.51	563	8494.18	563	7514.15	563	6966.98	563	11179.1	563	11178.7
564	1991.19	564	1983.92	564	8855.28	564	8406.96	564	6201.53	564	4591.58	564	10853.8	564	10370.2
565	3278.52	565	3088.57	565	8835.31	565	7868.25	565	5561.81	565	3016.14	565	14032.2	565	12788.3
566	2883.93	566	2788.55	566	8574.25	566	7203.32	566	6229.5	566	4023.07	566	11432.9	566	10865.1
567	3559.91	567	3299.69	567	8141.59	567	6686.6	567	6207.27	567	4769.32	567	10938.5	567	10111.2
568	3291.35	568	2801.38	568	8223.68	568	6500.33	568	6890.04	568	4984.6	568	11425.6	568	12385.8
569	4029.73	569	3124.51	569	9775.13	569	8058.23	569	7781.9	569	5373.76	569	11140.1	569	12179.1
570	4875.05	570	3838.17	570	10006.7	570	7847.12	570	7619.49	570	5222.38	570	11778	570	13158.1
571	5617.53	571	4407.32	571	10382.8	571	7463.58	571	7807.4	571	6728.42	571	14443.2	571	15790.1
572	4880.24	572	3664.53	572	9049.4	572	6224.84	572	7321.04	572	6858.14	572	15229.5	572	15406.6
573	5035.48	573	3259.44	573	7922.78	573	5352.82	573	6239.85	573	6891.78	573	15591.1	573	15474.5
574	3914.74	574	2488.73	574	6688.64	574	4393.54	574	4970.52	574	5528.68	574	18771.2	574	14996
575	4890.58	575	3752.64	575	6360.98	575	4020.16	575	4934.32	575	5003.93	575	18269.1	575	15634.5
576	4277.4	576	3200.86	576	7652.05	576	5106.49	576	4543.23	576	4575.53	576	19424.5	576	16766.8
577	4003.56	577	3240.83	577	8902.88	577	6415.46	577	3911.25	577	4204.22	577	21563.4	577	13845.2
578	4104.37	578	3403.27	578	8623.85	578	6252.02	578	3724.04	578	3441.75	578	16084.2	578	10427.7
579	5560.6	579	4878.6	579	8689.71	579	6285.76	579	3784.13	579	4032.05	579	14899.5	579	10368.7
580	7142.05	580	6074.04	580	8923.74	580	6251.06	580	2122.89	580	2556.44	580	12937.5	580	9616.76
581	9083.96	581	7184.02	581	9083.47	581	5908.65	581	1492.79	581	1572.69	581	12175.3	581	9224.24
582	9824.54	582	7397.84	582	8869.93	582	5612.89	582	719.935	582	963.98	582	11210.8	582	9231.22
583	8805	583	6324.4	583	8268.38	583	5400.13	583	251.243	583	284.316	583	10562.1	583	9089.17
584	6481.08	584	3922.62	584	7731.94	584	5232.48	584	528.616	584	616.782	584	10309.3	584	8869.68
585	4111.22	585	2964.29	585	7476.85	585	5321.42	585	1024.5	585	769.176	585	10203.4	585	9649.02
586	3085.19	586	3320.59	586	7988.76	586	6045.29	586	1937.26	586	1882.74	586	10165.2	586	10456.6
587	5237.79	587	5391.11	587	9210.14	587	7438.37	587	4601.22	587	3846.98	587	9926.33	587	10913.4
588	4963.82	588	4908.22	588	7445.39	588	5350.93	588	6761.99	588	4366.48	588	10424.1	588	11749.2
589	4192.01	589	3708.57	589	7232.56	589	5548.85	589	8365.38	589	5792.55	589	9676.4	589	9699.07
590	4284.85	590	4061.9	590	6309.07	590	4760.5	590	8763.08	590	6120.56	590	9606.96	590	8954.1
591	4208.59	591	5552.61	591	6614.18	591	4935.71	591	7962.59	591	4195.9	591	9316.55	591	9113.64
592	4076.78	592	4356.29	592	8492.31	592	6582.39	592	9042.27	592	5675.45	592	10049.4	592	8976.99
593	4756.05	593	5094.94	593	8273.76	593	6560.62	593	10231.4	593	7151.58	593	9856.23	593	8994.53
594	4477.99	594	5299.23	594	6628.26	594	5148.62	594	10866.5	594	7925.33	594	9038.17	594	8457.2
595	2969.75	595	2641.87	595	5665.02	595	4265.86	595	10223.5	595	9684.14	595	9458.5	595	8221.08
596	4933.29	596	4733.5	596	8116.45	596	6298.88	596	8306.42	596	9464.17	596	9785.12	596	9012.92
597	6685.96	597	6776.85	597	10027.2	597	7771.3	597	6912.67	597	6825.16	597	10313.7	597	9305.56
598	5275.25	598	4452.23	598	10401.6	598	8429.19	598	7740.77	598	7198.77	598	12161.2	598	10509.1
599	4687.79	599	4197.76	599	10714.5	599	8513.07	599	6181.41	599	6757.49	599	14978.7	599	12776.6
600	7331.66	600	8603.72	600	10736.4	600	8940.79	600	5879.21	600	5603.42	600	15491.7	600	12673.6
601	7517.29	601	8430.68	601	10480.4	601	8941.2	601	7012.8	601	4836.97	601	15514.2	601	12932.8
602	6994.45	602	7035.45	602	9943.03	602	8475.32	602	6871.78	602	6159.74	602	13687.2	602	12751.7
603	5964.69	603	5150.74	603	10399.4	603	8706.41	603	9190.55	603	5488.94	603	12886	603	13036.3
604	5322.06	604	4597.6	604	10256.6	604	8568.13	604	12957.6	604	8305.15	604	13280	604	12010.9
605	5560.01	605	4940.14	605	9390.63	605	8084.37	605	14494.4	605	8854.17	605	12907.1	605	11259.3
606	6408.18	606	5561.84	606	8857.07	606	7521.86	606	15766	606	10416.8	606	10650.4	606	9316.6
607	6942.67	607	5682	607	9610.24	607	7877.15	607	16766.2	607	11243.3	607	9870.61	607	8337.53
608	7400.9	608	6061.07	608	9381.03	608	7778.96	608	17389.9	608	12582	608	10064.4	608	8579.51
609	8086.4	609	7163.68	609	7872	609	6787.04	609	15592.5	609	14375.2	609	11920.8	609	8292.27
610	8514.47	610	7724.38	610	7550.31	610	6780.44	610	13768.8	610	11979.9	610	12501.2	610	8030.91
611	8511.26	611	7840.12	611	7950.64	611	7012.94	611	11129.3	611	9762.05	611	13533.3	611	8133.53
612	8093.08	612	7711.86	612	6314.96	612	6034.28	612	9047.99	612	8172.91	612	13643.6	612	8534.79
613	7759.72	613	7713.55	613	5560.57	613	5098.44	613	5903.44	613	5652.93	613	13234.8	613	9839.75
614	7336.47	614	7542.09	614	6636.63	614	5731.47	614	5397.77	614	4359.31	614	13046.8	614	9954.72
615	6449.12	615	5915.77	615	7641.41	615	6600.1	615	10569.7	615	7775.82	615	11788.8	615	9061.12
616	6661.22	616	5667.68	616	7688.19	616	6944.01	616	11434.4	616	8435.39	616	11701.4	616	9658.09
617	7347.37	617	6508.39	617	7868.88	617	7045.72	617	10302.6	617	7208.6	617	12598	617	10075.4
618	7227.07	618	6092.02	618	8230.98	618	7507.48	618	11937.5	618	8444.97	618	11420.4	618	9837.16
619	6303.32	619	5654.27	619	8456.99	619	7538.16	619	12741.1	619	9914.37	619	10716.9	619	9061.56
620	6333.53	620	4633.02	620	9170.25	620	7478.29	620	13254.9	620	11028.4	620	10388	620	9101.53
621	5153.07	621	3963.63	621	8978.84	621	7887.2	621	13632.6	621	12410.8	621	9617.51	621	9086.51
622	5549.85	622	3508.02	622	8435.1	622	7678.47	622	14069.3	622	13061	622	9320.13	622	9090.87
623	6573.95	623	3934.29	623	7110.25	623	7568.06	623	14030.9	623	13679.2	623	9799.27	623	8521.02
624	7451.23	624	4635.1	624	5552.08	624	5880.5	624	13790.1	624	13353.5	624	11156.7	624	9737.35
625	7638.58	625	4876.23	625	4594.91	625	4683.97	625	14520.3	625	13700.2	625	13118.1	625	12195.1
626	7650.31	626	6003.37	626	4083.38	626	4019.32	626	15118.4	626	13854.1	626	14980.6	626	14893.6
627	6903.66	627	6572.47	627	3672.45	627	2991.51	627	16290.5	627	13676.9	627	16170.3	627	16544
628	5807.82	628	6176.1	628	5495.76	628	3739	628	19120.1	628	14642.1	628	17704.1	628	16964.5
629	5061.19	629	5291.95	629	5611.8	629	3755.09	629	19694	629	15864.1	629	18386.6	629	16454.5
630	4657.14	630	4940.18	630	4773.6	630	3316.24	630	18019.3	630	14236.7	630	18515.9	630	16201.9
631	4571.46	631	5037.99	631	5936.35	631	5216.38	631	13659.3	631	10496.7	631	19513.4	631	16987.3
632	4687.24	632	4912.55	632	5579.79	632	4473.2	632	9985.89	632	7786.92	632	19384.4	632	18093.8
633	4049.93	633	3680.6	633	5519.86	633	4343.47	633	10314	633	8080.29	633	19436.7	633	18645.3
634	3958.84	634	3345.19	634	6655.73	634	5054.26	634	9863.95	634	9644.35	634	20154.6	634	18056
635	5530.26	635	4025.05	635	6964.48	635	6157.73	635	9572.74	635	9327.26	635	20672.5	635	19109.6
636	6693.54	636	4679.59	636	7034.74	636	5717.23	636	10503	636	9582.32	636	20701.2	636	18699
637	7059.72	637	5393.35	637	5916.95	637	5639.59	637	10262.8	637	9618.77	637	18623.3	637	15454.8
638	6447.29	638	4799.99	638	5025.98	638	4125.12	638	8968.19	638	8026.16	638	16786.7	638	14322.3
639	6354.59	639	4280.09	639	5823.46	639	3541.02	639	6848.76	639	5777.98	639	15463.6	639	12639.2
640	7623.56	640	4515.99	640	7091.55	640	4093.36	640	7144.93	640	5854.19	640	13698	640	10361.7
641	6114.89	641	3917.96	641	7171.58	641	4025.91	641	6551.52	641	4301.57	641	12107.7	641	10339.7
642	7092.25	642	4106.55	642	5664.72	642	3149.89	642	8391.9	642	4166.06	642	11782.5	642	11020.4
643	8000.82	643	5511.7	643	6764.39	643	3940.61	643	12927.9	643	7352.68	643	10775.4	643	10735.4
644	7250.36	644	5071.17	644	6390.09	644	4332.22	644	12064.7	644	7511.42	644	13487	644	12233.8
645	6391.35	645	4679.18	645	5648.19	645	3387.76	645	11514.4	645	8266.47	645	11852.1	645	10806.7
646	6405.88	646	4059.16	646	6228.95	646	4302.5	646	9958.83	646	7148.3	646	13129.3	646	11768
647	7728.99	647	4108.56	647	7659.19	647	5262.08	647	8144.66	647	5706.71	647	12371.9	647	6780.16
648	8407.57	648	4503.31	648	10192.1	648	8466.67	648	7862.65	648	5776.03	648	12914.7	648	10196.6
649	8347.04	649	5007.77	649	11502.3	649	10253.2	649	10127	649	6933.8	649	12300.2	649	10055.1
650	7980.75	650	4579.59	650	12695.5	650	11778.4	650	12589.5	650	8232.52	650	12631.7	650	9952.8
651	6713.18	651	4899.35	651	12813.4	651	10603.3	651	13425.7	651	8418.65	651	13614.9	651	9542.23
652	6372.46	652	5540.7	652	12585.3	652	9998.75	652	12940.1	652	7986.63	652	15610.2	652	9652.81
653	5859.97	653	4615.66	653	11656.6	653	8920.83	653	13012.4	653	8643.23	653	17952.3	653	12392.3
654	6488.19	654	4595.05	654	11636.4	654	8735	654	12415.7	654	9847.6	654	18403.4	654	15089.5
655	7349.64	655	6290.6	655	11138.4	655	8148.43	655	10555.6	655	10450.3	655	17944.9	655	18083.5
656	7456.18	656	6005.28	656	11116.9	656	8589.4	656	8267.48	656	8989.25	656	16497.6	656	16239.9
657	7879.94	657	6608.12	657	11943.7	657	8673.72	657	7772.08	657	7783.72	657	15529.3	657	14264.1
658	7332.61	658	6030.18	658	12145.7	658	9071.92	658	8505.33	658	7307.83	658	12429.2	658	12939
659	6089.03	659	4887.35	659	11621.3	659	9195.8	659	8730.78	659	6399.41	659	12230.1	659	13005.8
660	5455.22	660	4281.68	660	11300.7	660	9307.93	660	9720	660	6113.94	660	8730.86	660	11051.7
661	4861.6	661	4448.74	661	12166.8	661	10192.5	661	11218.3	661	7926.7	661	9880.55	661	11157
662	4519.99	662	3947.43	662	13370.4	662	10831.3	662	11189.2	662	9013.58	662	8742.74	662	9875.6
663	4245.92	663	2730.95	663	12834.9	663	10814.6	663	11891.1	663	9585.71	663	10214.3	663	9924.22
664	3889.26	664	2372.93	664	11958.9	664	10201.5	664	10681.9	664	7495.2	664	10822.9	664	9364.01
665	2846.03	665	1914.62	665	12450.2	665	10277.1	665	9154.77	665	6775.26	665	14081.8	665	9967.07
666	2898.31	666	1792.44	666	11750.9	666	9540.06	666	9308.19	666	7986.32	666	17325.3	666	11588
667	3968.15	667	2866.75	667	10489.1	667	8343.06	667	7457.27	667	7985.08	667	20122.9	667	13099.2
668	5451.09	668	3618.72	668	9305.35	668	7175.02	668	6784.7	668	7924.97	668	21043.9	668	14271.8
669	5331.1	669	3981.67	669	8842.01	669	7151.04	669	7026.34	669	7918.65	669	21196.1	669	14340.2
670	5634.34	670	4025.84	670	9388.13	670	7650.75	670	6869.07	670	7050.59	670	21501.6	670	20430.3
671	4613.16	671	3833.13	671	10664.4	671	9088.56	671	7941.64	671	6901.53	671	19961.1	671	19418.7
672	2927.29	672	3224.34	672	12863	672	10564.8	672	8786.46	672	7575.74	672	18263.9	672	19188.8
673	1762.33	673	1870.29	673	13998.4	673	10824.6	673	11048.9	673	8935.15	673	16033.3	673	17102.9
674	1463.15	674	1835.94	674	12885.9	674	8980.69	674	11970.3	674	9074.91	674	15608.1	674	14633.7
675	1894.82	675	1921.76	675	11065.7	675	7745.1	675	11651.6	675	8758.42	675	17047.5	675	18302.2
676	2195.8	676	2340.29	676	12057	676	8566.28	676	9813.18	676	7213.22	676	16084.3	676	17121.1
677	3915.64	677	3205.64	677	10903.3	677	7946.27	677	8425.22	677	4831.77	677	18300	677	19195.5
678	4600.1	678	3633.32	678	9016.35	678	6535.7	678	9634.03	678	6397.24	678	20212.7	678	19100.3
679	5327.34	679	4142.34	679	7669.4	679	6019.49	679	7461.72	679	4304.94	679	20315.7	679	16800.3
680	5651.73	680	3886.78	680	9184.91	680	6896.18	680	8374	680	4486.56	680	20546.7	680	16128.4
681	5142.68	681	2847.83	681	9389.9	681	7629.02	681	10035.1	681	5096.11	681	19371.5	681	15730.6
682	4830.36	682	2616.22	682	10384.4	682	7675.78	682	10406.6	682	5918.9	682	18989.8	682	16669.1
683	5163.94	683	3216.07	683	10691.6	683	7672.76	683	10745.9	683	9112.75	683	12683.6	683	13728.5
684	4874.56	684	3486.82	684	11509.8	684	8249.41	684	10232.5	684	7890.13	684	10092.3	684	10990
685	4464.76	685	2959.03	685	11413.2	685	8178.25	685	8815.67	685	7358.82	685	9481.88	685	8613.39
686	3708.39	686	2913.1	686	12309.8	686	8338.8	686	7773.78	686	5528.83	686	8511.99	686	7399.93
687	3224.47	687	2633.91	687	13061.1	687	9381.64	687	11060.5	687	7761.37	687	10482.3	687	8067.67
688	2849.31	688	2052.52	688	11176.1	688	8515.3	688	13446.7	688	9197.46	688	11310.1	688	9609.04
689	3223.1	689	1992.03	689	12459.6	689	9742.31	689	13958.5	689	9664.29	689	11107.8	689	8933.63
690	3177.88	690	2120.87	690	11296	690	9355.44	690	14037.6	690	11716.8	690	11555.4	690	9857.19
691	2555.63	691	1820.3	691	10911	691	8760.38	691	15439.7	691	12573.9	691	10562.5	691	7731.69
692	3046.69	692	1948.82	692	11397.2	692	9108.69	692	13606.7	692	10782.8	692	11700.4	692	9162.35
693	2897.34	693	2234.46	693	11865.4	693	9347.82	693	16135.9	693	14544.3	693	12533.9	693	9845.32
694	2940.66	694	2332.33	694	12380.1	694	9395.76	694	20004.1	694	17634.7	694	14355.3	694	11053.5
695	4023.08	695	2801.17	695	12050.3	695	9490.43	695	18002	695	15690.6	695	15823.8	695	12275.9
696	4671.23	696	3740.77	696	12528.3	696	10129.4	696	21126.2	696	18509.3	696	17160.1	696	13912.7
697	4438.01	697	3641.36	697	11760.9	697	9609.21	697	24449.2	697	20489.6	697	16126.1	697	14207.5
698	3508.32	698	2235.88	698	10831.8	698	9361.02	698	22918.6	698	16958.2	698	15431.2	698	14034.4
699	4356.36	699	2323.63	699	10418.5	699	8341.05	699	22060.6	699	16224.9	699	12652.6	699	12311.5
700	2494.26	700	1761.64	700	10782.2	700	8836.29	700	20871.6	700	14442.7	700	11529.7	700	10641.7
701	3010.42	701	2165.94	701	11023	701	8477.64	701	23862.2	701	17462.1	701	10943.3	701	9469.83
702	2752.06	702	2460.76	702	10043.1	702	8424.01	702	18545	702	12506.5	702	10296.8	702	8689.85
703	3224.64	703	3190.38	703	9213.38	703	7779.78	703	12761.9	703	7949.96	703	8868.61	703	7377.56
704	3647.53	704	3642.99	704	9690.48	704	7671.5	704	17557	704	13188	704	8946.74	704	7179.06
705	4691.07	705	4142.48	705	10114	705	7969.64	705	9959.39	705	6272.51	705	8889.67	705	7246.68
706	5560.4	706	5047.64	706	10047.3	706	7741.76	706	8766.98	706	5398.48	706	8229.34	706	6305.14
707	6419.39	707	4083.71	707	10464.1	707	8565.82	707	9811.02	707	7056.14	707	7922.06	707	5747.03
708	7163.12	708	4755.21	708	11364.1	708	9245.09	708	10735	708	7793.49	708	8217.27	708	6276.84
709	8720.6	709	5075.36	709	11575	709	8921.42	709	12382.3	709	9232.43	709	6730.95	709	6140.24
710	10303.3	710	5696.39	710	12516	710	9511.34	710	11668.6	710	9830.5	710	7602.97	710	5997.79
711	11859	711	7093.01	711	12837.4	711	10547.4	711	14371.6	711	12691	711	5412.63	711	4455.33
712	13786.4	712	9062.86	712	12083.9	712	10334.1	712	14529.3	712	12863.6	712	5735.7	712	4518.04
713	9523.08	713	5299.34	713	11445.4	713	9485.48	713	20328.8	713	18055.2	713	5435.78	713	4890.19
714	10504.9	714	5974.31	714	11698.3	714	8843.19	714	23198.8	714	19863.9	714	5020.15	714	4498.72
715	10720.1	715	6888.77	715	12568.4	715	9133.66	715	21017.4	715	19095.1	715	5097.78	715	4954.5
716	9452.79	716	6573.44	716	11449.7	716	8393.41	716	18908.9	716	17614	716	5747.73	716	5656.83
717	7473.71	717	5644.98	717	11965	717	9953.97	717	19054.5	717	17569.2	717	6233.56	717	6544.66
718	5781.51	718	4661.97	718	12418.8	718	10263	718	13498.4	718	11513.6	718	6053.9	718	5580.36
719	4610.09	719	3920.4	719	12433	719	10670.6	719	14952.5	719	12215.3	719	5633.73	719	5120.9
720	5033.68	720	3340.3	720	10607.3	720	9888.02	720	13773.8	720	10975.2	720	5360.46	720	4187.92
721	5764.75	721	4298.42	721	9404.73	721	8254.3	721	12648.5	721	9496.38	721	5982.7	721	4330.78
722	5995.98	722	5334.85	722	8509.9	722	7341.51	722	11344.3	722	9297.83	722	6167.61	722	4607.16
723	8064.81	723	7446.39	723	8648.33	723	6941.32	723	13023.4	723	9673.08	723	6790.48	723	5493.85
724	6623.2	724	6295.72	724	9013.71	724	7006.44	724	13936.8	724	9430.92	724	6967.14	724	6569.34
725	5352.48	725	4744.63	725	9992.24	725	7382.96	725	13449.1	725	9219.23	725	7998.94	725	7949.76
726	5187.73	726	4529.57	726	10030	726	8179.31	726	14176.7	726	11670.1	726	9145.07	726	9034.82
727	5348.9	727	4359.35	727	9737.1	727	9816.51	727	11006.7	727	11258.8	727	11331.7	727	10348.7
728	5168.01	728	4182.49	728	9181.77	728	10090.5	728	11035.6	728	10631.9	728	12267.9	728	11224.8
729	5605.34	729	4962.05	729	8529.86	729	8709.87	729	9095.66	729	9441.99	729	13915.1	729	12694.3
730	7114.22	730	6169.96	730	9073.67	730	9703.09	730	10789.4	730	9283.09	730	15257.2	730	14098.2
731	7022.28	731	6673.93	731	8009.99	731	8938.04	731	9869.07	731	7897.73	731	16187.7	731	14211.7
732	6707.98	732	5720.18	732	8015.04	732	8726.9	732	9195.17	732	6961.65	732	17320	732	14381.4
733	5946.8	733	4678.41	733	8147.39	733	7205.71	733	6209.86	733	3562.55	733	15963.8	733	11726.2
734	8380.91	734	5580.74	734	7714.94	734	5360.67	734	7196.74	734	4048	734	13369.1	734	9640.94
735	11681.9	735	9359.39	735	8670.08	735	5654.88	735	3792.75	735	2744.51	735	20118	735	17492.1
736	11977.6	736	11706.2	736	8976.19	736	6122.57	736	5633.37	736	3645.84	736	20911.7	736	19597.4
737	7868.87	737	8550.95	737	9420.65	737	7086.62	737	6048.39	737	3742.29	737	17684.4	737	18147.5
738	4342.4	738	3959.39	738	9537.52	738	6592.01	738	6609.28	738	4426.05	738	14091.5	738	13566.7
739	3011.99	739	2180.99	739	10963.2	739	7691.51	739	8222.38	739	6610.74	739	11483.4	739	11011.5
740	2704.19	740	1869.23	740	10681.4	740	7804.75	740	7449.4	740	6478.54	740	9192.56	740	9724.94
741	3059.92	741	2106.11	741	10280.8	741	8261.35	741	7343.09	741	6888.79	741	8116.9	741	8465.06
742	3275.07	742	2429.04	742	9553.62	742	7345.15	742	7293.65	742	6435.73	742	5578.44	742	6529.48
743	3317.89	743	2519.35	743	9969.19	743	7116.09	743	7848	743	6819.19	743	4591.5	743	6262.31
744	2899.78	744	1995.03	744	11188.3	744	7791.37	744	8460.07	744	8322.23	744	3697.82	744	5205.14
745	2946.95	745	1592.89	745	8037.97	745	6405.97	745	8871	745	8429.81	745	2517.99	745	3568.11
746	4111	746	2250.21	746	9225.71	746	7515.51	746	9163.02	746	8594.39	746	2241.11	746	2755.98
747	5215.54	747	3531.4	747	9279.65	747	7932.59	747	9493.11	747	7900.32	747	2350.2	747	2958.98
748	5500.32	748	4102.78	748	10011.2	748	7735.55	748	8121.83	748	7725.33	748	2617.74	748	2834.35
749	5161.33	749	4297.08	749	9735.48	749	7440.96	749	6763.71	749	6563.19	749	3815.97	749	3950.99
750	5156.48	750	4607.93	750	9086.3	750	7550.21	750	7789.65	750	7403.36	750	4133.45	750	3943.37
751	5908.35	751	5100.55	751	9399.36	751	7645.19	751	8403.7	751	7641.83	751	5090.53	751	4862.48
752	6596.18	752	5454.35	752	8545.95	752	6634.4	752	9235.06	752	8457.32	752	6223.23	752	6645.9
753	6973.01	753	5945.18	753	8286.29	753	5778.94	753	8298.07	753	7600.38	753	6032.13	753	5453.75
754	7079.16	754	6387.42	754	7031.11	754	5526.67	754	7384.75	754	6906.76	754	6110.73	754	5114.98
755	6232.63	755	6185.81	755	7075.06	755	5936.88	755	8592.48	755	6443.2	755	6269.52	755	5036.33
756	6347.19	756	6484.35	756	7176.23	756	6119.59	756	11558.7	756	8937.17	756	5969.66	756	4814.12
757	5567.23	757	4875.26	757	6154.65	757	5182.95	757	13696.4	757	12609	757	5820.69	757	5378.23
758	4458.31	758	3718.66	758	6855.27	758	6581.02	758	11478.1	758	11858	758	5787.1	758	5613.88
759	4444.87	759	4031.3	759	7493.2	759	7453.54	759	11245	759	10363.2	759	5824.52	759	4750.5
760	4822.82	760	4863.02	760	7484.16	760	6832.15	760	12200.8	760	11628.9	760	5969.16	760	4236.06
761	4542.66	761	5085.85	761	7410.23	761	5557.11	761	9429.4	761	9115.51	761	6793.41	761	5829.11
762	5201.44	762	5318.27	762	8483.89	762	6249.61	762	11657.7	762	11772.8	762	7220.49	762	6829.45
763	5302.28	763	4682.63	763	9509.77	763	6809.73	763	10446	763	10056.6	763	6960.6	763	6838.94
764	5446.77	764	4398.35	764	10948.7	764	7324.02	764	9956.92	764	9523.15	764	6483.97	764	5657.72
765	3519.8	765	3208.49	765	10396.3	765	6706.29	765	10073.5	765	7536.37	765	5381.9	765	4975.24
766	4803.34	766	4081.96	766	8965.75	766	6103.32	766	10292.1	766	6893.06	766	5318.67	766	4717.3
767	2812.97	767	3151.03	767	7717.59	767	5725.35	767	12090.8	767	7367.96	767	5341.16	767	5342.08
768	2028.1	768	1291.27	768	7840.31	768	5834.01	768	10822.5	768	6587.9	768	5585.86	768	5648.23
769	3157.48	769	2916.08	769	6974.04	769	5661.6	769	9667.69	769	8489.41	769	4990.53	769	5268.63
770	3330.05	770	2471.57	770	6846.86	770	4846.05	770	10579.1	770	7300.49	770	5528.51	770	5808.67
771	4196.15	771	3932.6	771	7392.79	771	6009.11	771	11000.7	771	9573.67	771	6221.94	771	6399.48
772	4486.52	772	5886.94	772	8144.69	772	6801.47	772	10570.2	772	10127.2	772	6331.73	772	5753.45
773	3666.46	773	5124.61	773	8740	773	7165.6	773	10670.7	773	10632.1	773	6306.95	773	5623.35
774	3763.84	774	5140.09	774	9156.6	774	7182.18	774	11845.2	774	11567.6	774	7085.24	774	6368.58
775	3367.87	775	3094.89	775	8512.14	775	6547.62	775	11236.5	775	11236.9	775	7081.71	775	5867.71
776	3614.32	776	3295.86	776	7309.82	776	4596.34	776	9410.48	776	9893.93	776	6934.63	776	7037.84
777	4336.8	777	4094.81	777	7231.68	777	5102.92	777	7538.97	777	8044.57	777	7982.25	777	7363.99
778	4464.31	778	3197.27	778	6115.41	778	3952.2	778	6412.84	778	6584.72	778	8533.6	778	7384.13
779	5256.26	779	3940.35	779	6574.36	779	4479.41	779	8274.35	779	9638.45	779	9097.62	779	7127.54
780	5430.22	780	3887.61	780	6524.34	780	4440.3	780	12425.9	780	13483.7	780	9126.44	780	6578.49
781	7048.58	781	6059.65	781	7009.49	781	4583.56	781	13892	781	13408	781	9824.6	781	6281.27
782	5305.07	782	4362.91	782	7111.54	782	4781.75	782	13040.7	782	12522.8	782	9868.18	782	7039.08
783	4898.44	783	4751.27	783	6909.06	783	4112.44	783	12586.2	783	11906.6	783	8354.52	783	5260.31
784	4339.55	784	4566.35	784	7943.53	784	5301.2	784	12782.6	784	11133.5	784	7492.87	784	4891.84
785	3664.66	785	3871.9	785	7151.46	785	4528.57	785	9993.7	785	7360.3	785	6515.69	785	4470.87
786	2268.29	786	2273.91	786	8052.06	786	5474.27	786	8639.63	786	5876.57	786	5775.81	786	4782.47
787	1754.88	787	2076.11	787	8171.73	787	5590.13	787	6726.26	787	4424.46	787	5243.41	787	5439.8
788	1189.82	788	1278.24	788	8702.88	788	5069.38	788	4852.33	788	3323.46	788	6637.69	788	6664.64
789	410.201	789	629.844	789	8634.44	789	6072.59	789	5669.56	789	4768.6	789	6569.38	789	6374.05
790	402.048	790	557.041	790	8066.76	790	5751.16	790	6818.4	790	4931.7	790	8624.67	790	7436.49
791	308.806	791	231.21	791	7730.39	791	5662.25	791	6241.06	791	3458.53	791	8859.71	791	7403.75
792	442.192	792	323.27	792	7947.37	792	6884.76	792	4349.99	792	2018.73	792	10742.6	792	7162.35
793	586.628	793	543.525	793	7286.39	793	7462.14	793	3478.78	793	1638.74	793	10988.3	793	7557.93
794	1202.64	794	799.772	794	7681.33	794	8090.56	794	3479.29	794	2091.87	794	10586.1	794	7963.11
795	812.251	795	819.785	795	10585.6	795	9699.46	795	4191.31	795	3138.83	795	10778.9	795	8300.08
796	1092.3	796	1254.44	796	11927.9	796	10550.6	796	5636.56	796	3891.68	796	11232.3	796	8971.08
797	1697.04	797	1919.87	797	11797	797	9333.45	797	5530.7	797	4252.76	797	9679.4	797	9281.74
798	1654.58	798	1559.35	798	12866.3	798	10213.8	798	7217.38	798	4732.11	798	8655.91	798	7510.56
799	2106.56	799	2033.26	799	11385	799	9017.62	799	7941.32	799	6078.36	799	8921.67	799	7438.33
800	1998.05	800	1934.55	800	9586.83	800	8136.1	800	9410.6	800	6973.05	800	9635.73	800	8109.84
801	2633.69	801	2822.6	801	10089.5	801	8082.12	801	9275.77	801	5913.03	801	9529.49	801	7803.63
802	3308.78	802	3572.79	802	9106.08	802	7089.69	802	8861.08	802	3698.25	802	7853.97	802	6705.07
803	3744.39	803	4577.78	803	7579.7	803	6049.23	803	7425.3	803	2342.95	803	9271.86	803	7730.32
804	3450.68	804	4509.63	804	9625.95	804	7457.14	804	5627.94	804	2283.39	804	11152.3	804	8247.77
805	2643.32	805	3862.97	805	8530.43	805	6872.49	805	4300.42	805	2663.52	805	12677.8	805	10140.4
806	2113.2	806	3705.76	806	10643.4	806	7769.41	806	3024.28	806	1049.93	806	11004.6	806	11167.7
807	2125.32	807	4600.41	807	9396.53	807	6976.65	807	3118.1	807	2779.97	807	8604.44	807	8963.26
808	2356.66	808	4212.4	808	9187.94	808	7165.53	808	4492.43	808	4407.61	808	7457.44	808	6084.3
809	2380.27	809	3100.55	809	8991.15	809	7124.96	809	3801.66	809	3336.37	809	8197.82	809	6060.06
810	2725.48	810	4148.53	810	8671.84	810	6865.47	810	5022.76	810	3689.61	810	8083.11	810	6077.82
811	2655.34	811	2780.4	811	9249.47	811	7169.79	811	3981.24	811	3063.61	811	7649.21	811	5093.46
812	2799.32	812	3123.74	812	8855.97	812	6670.82	812	3940.23	812	3636.09	812	6407.09	812	4091.02
813	2877.2	813	3364.16	813	7775.48	813	6287.06	813	4468.86	813	4199.28	813	5640.51	813	3122.96
814	2643.88	814	3019.45	814	7215.25	814	5708.54	814	4477.51	814	3621.4	814	4001.99	814	2098.96
815	2751	815	2488.66	815	6806.72	815	5345.19	815	6539.98	815	4954.44	815	2665.13	815	1033.33
816	2501.33	816	1410.07	816	6913.88	816	6039.62	816	6359.53	816	4649.68	816	3551.9	816	1421.07
817	3287.22	817	2553.24	817	6386.7	817	5685.65	817	8420.36	817	5274.95	817	5374.26	817	3016.46
818	4396.65	818	3630.26	818	7299.45	818	7025.88	818	7352.48	818	5567.45	818	8308.44	818	4803.6
819	5236.63	819	4357.26	819	8458.75	819	7603.48	819	5311.73	819	4213.9	819	10696.3	819	6248.17
820	6529.06	820	4717.91	820	9042.36	820	7760.34	820	1824.34	820	1538.24	820	12727.9	820	8456.81
821	8236.39	821	5666.38	821	9349.38	821	7775.25	821	1798.26	821	1826.49	821	11429.6	821	7555.74
822	8401.85	822	6611.22	822	9345.6	822	7790.57	822	996.425	822	1122.16	822	11427.1	822	8642.67
823	8023.44	823	6680	823	9651.13	823	7010.16	823	1882.85	823	2840.83	823	12028.9	823	10274
824	8855.6	824	7386.47	824	9572.98	824	6969.73	824	3257.85	824	3938.29	824	12789.4	824	12345.1
825	7705.83	825	6714.67	825	9628.38	825	6837.67	825	3364.68	825	4497.96	825	12029.5	825	12867.9
826	9384.87	826	8298.54	826	9833.84	826	7288.88	826	4366.99	826	5117.76	826	11485	826	11326.5
827	8564.76	827	7296.97	827	10394.6	827	7597	827	3154.51	827	4746.28	827	11320.3	827	10133.3
828	7965.54	828	6657.65	828	10742.6	828	8079.46	828	4133	828	5673.35	828	11461.7	828	9451.22
829	7078.83	829	5582.97	829	10697.5	829	8278.13	829	5813.05	829	8476.58	829	12209	829	11563.4
830	6468.77	830	5490.16	830	9826.28	830	7312.54	830	9200.86	830	12543.4	830	9252.4	830	9898.81
831	6766.37	831	5843.68	831	8553.15	831	5982.52	831	8280.07	831	10857.7	831	9643.42	831	9294.85
832	6943.23	832	5460.14	832	7911.24	832	6114.55	832	6312.88	832	8466.53	832	8268.92	832	8358.08
833	6598.56	833	4376.01	833	6647.64	833	5309.68	833	5031.16	833	6635.64	833	8372.02	833	8102.12
834	5910.72	834	4527.33	834	5893.05	834	5194.57	834	4540.71	834	5230.84	834	9566.14	834	8475.31
835	5729.5	835	4648.4	835	5281.38	835	4710.24	835	5011.08	835	5430.88	835	9127.81	835	9230.17
836	7361.08	836	5502.04	836	5827.62	836	4892.4	836	5398.01	836	5919.48	836	7736.58	836	6737.23
837	7116.27	837	4244.32	837	7942.06	837	5839.59	837	5834.07	837	6426.6	837	6893.1	837	5342.99
838	5115.52	838	2348.31	838	7157.08	838	4378.9	838	6826.29	838	7035.95	838	8433.65	838	5786.13
839	2419.1	839	1283.14	839	5491.06	839	3767.96	839	6226.83	839	5270.89	839	9006.43	839	6657.31
840	1458.64	840	912.429	840	5056.65	840	3468.25	840	5194.36	840	4221.59	840	7886.46	840	6997.22
841	1357.86	841	939.291	841	4431.07	841	3676.53	841	4819.52	841	3986.17	841	6173.23	841	6054.12
842	1225.31	842	952.888	842	4718.02	842	4066.33	842	4272.5	842	3194.06	842	7348.68	842	6983.98
843	631.453	843	449.446	843	5097.07	843	4212.6	843	3716.07	843	2312.31	843	5491.66	843	4955.42
844	1176.22	844	520.854	844	4893.98	844	4194.62	844	3560.05	844	2263.22	844	3867.75	844	2881.13
845	1173.68	845	584.084	845	5456.74	845	4299.66	845	3705.01	845	2215.16	845	2762.16	845	2001.05
846	2019.45	846	1306.79	846	5182.04	846	4014.88	846	4053.27	846	2950.55	846	3420.06	846	2270.71
847	1516.73	847	722.005	847	5466.07	847	4202.53	847	2187.2	847	990.505	847	4790.86	847	3481.06
848	1364.89	848	835.435	848	5373.35	848	3955.48	848	1983.68	848	873.511	848	7245.04	848	5263.87
849	2018.03	849	1537.87	849	5302.85	849	3930.91	849	5204.82	849	3356.99	849	10377.9	849	6913.89
850	3945.4	850	3485.26	850	5228.83	850	3812.11	850	4769.61	850	3701.76	850	10406.1	850	7059.48
851	5515.23	851	4192.52	851	4636.62	851	3355.11	851	5076.7	851	4492.02	851	11649.2	851	7355.25
852	5347.95	852	4014.92	852	5005.44	852	3768	852	4668.74	852	5730	852	10753.4	852	6645.45
853	4581.36	853	2794.8	853	5417	853	3992.4	853	4906.6	853	5244.79	853	8205.71	853	5152.91
854	5200.35	854	4182.01	854	5813.06	854	3924.18	854	5332.14	854	5226.38	854	11957.4	854	9103.29
855	4315.23	855	3659.02	855	5325.74	855	4078.18	855	5423.9	855	5001.14	855	9015.16	855	5755.39
856	3852.4	856	3937.37	856	5778.63	856	4355.78	856	6385.96	856	5882.3	856	8347.91	856	5213.69
857	4241.16	857	4910.47	857	5710.51	857	4242.99	857	9622.26	857	7780.37	857	7215.99	857	5808.56
858	4252.88	858	4936.01	858	6070.44	858	4264.9	858	8082.22	858	6670.25	858	12901.4	858	11293.2
859	4643.71	859	4815.25	859	5567.52	859	4155.15	859	6483.69	859	5823.22	859	11986.3	859	8966.47
860	4375.01	860	4556.74	860	4871.31	860	4021.14	860	6355.09	860	4698.02	860	14051.5	860	10505.9
861	4820.76	861	5174.85	861	5089.25	861	3802.99	861	8451.01	861	5748.77	861	14598.4	861	12349.3
862	5462.83	862	5620.9	862	5653.7	862	4010.48	862	6809.55	862	4879.19	862	13718.8	862	12488.1
863	6804.19	863	6862.29	863	5596	863	4194.02	863	5158.9	863	4020.36	863	11229.6	863	9964.68
864	9672.02	864	10422.3	864	6205.32	864	5002.41	864	6371.13	864	5716.89	864	10042.1	864	10085.6
865	14254.2	865	14034.5	865	6673.02	865	5181.49	865	6493.56	865	5210.58	865	8295.81	865	8096.14
866	16563.1	866	14619.3	866	6754.36	866	5027.94	866	7302.72	866	5047.65	866	6301.29	866	6144.71
867	13494	867	9545.71	867	6757.5	867	4791.5	867	10803.1	867	6476.28	867	6222.41	867	5549.09
868	9863.47	868	6245.13	868	7377.98	868	5340.38	868	11194.6	868	6292.99	868	7422.33	868	6328.31
869	8185.89	869	4749.15	869	7052.48	869	5165.55	869	10625.6	869	5414.13	869	6736.98	869	5615.56
870	7999.26	870	5304.45	870	6851.49	870	5088.8	870	9527.84	870	7589.88	870	7245.26	870	5984.29
871	7324.63	871	6177.54	871	6104.06	871	4781.94	871	4773.89	871	5470.22	871	7002.96	871	5971.64
872	6658.04	872	6360.51	872	6148.84	872	4772.11	872	2458.26	872	2519.52	872	7833.63	872	6969.31
873	6516.43	873	5741.06	873	5768.69	873	4002.26	873	2168.6	873	2494.93	873	10272.2	873	8630.86
874	6865.52	874	6041.58	874	6221.71	874	4383.28	874	1022.05	874	1759.78	874	14341.1	874	11684.1
875	7243.69	875	5974.17	875	5389.62	875	3759.49	875	470.883	875	611.83	875	16847.1	875	13015.8
876	7062.08	876	5388.38	876	5710.06	876	3946.8	876	696.383	876	628.117	876	15926.2	876	15698.3
877	6666.44	877	5070.34	877	5288.52	877	3426.52	877	1343.72	877	1452.6	877	14996	877	14178.2
878	6376.09	878	5209.21	878	5685.25	878	3512.06	878	2650.31	878	3071.79	878	13854.8	878	12679.8
879	6445.85	879	5241.64	879	5992.64	879	3553.1	879	4296.56	879	4674.37	879	16459	879	13053
880	5657.95	880	4621.84	880	6093.62	880	3965.91	880	6041.26	880	6494.55	880	15274.1	880	12616.6
881	5314.89	881	4378.54	881	5260.06	881	3475.06	881	7638.16	881	7206.98	881	14170.3	881	11119.8
882	4975.55	882	4458.95	882	6046.73	882	4133.82	882	5922.12	882	8658.46	882	12302.4	882	11069.1
883	5423.75	883	4552.28	883	7779.99	883	5750.9	883	3809.18	883	5635.05	883	10763.9	883	8364.85
884	6519.14	884	5491.25	884	6716.79	884	5217.03	884	3808.24	884	4194.05	884	12064.6	884	6366.22
885	7450.77	885	6419.02	885	5941.04	885	4480.35	885	3127.05	885	2366.49	885	13415.9	885	7877.3
886	7824.89	886	6431.69	886	7192.34	886	5968.49	886	4557.74	886	3411.76	886	13349	886	9498.59
887	8809.82	887	7129.17	887	6676.07	887	5679.56	887	4288.05	887	3491.1	887	13097.2	887	9150.12
888	9220.28	888	8033.03	888	6395.96	888	5461.85	888	6341.55	888	5123.6	888	14105.7	888	10385.4
889	9282.4	889	7922.12	889	7179.57	889	5985.83	889	7324.18	889	5656.73	889	14665.6	889	8703.87
890	8733.63	890	7206.74	890	7337.88	890	6104.2	890	9492.43	890	7792.52	890	12976.4	890	10077
891	9118.81	891	6678.72	891	7291.43	891	6042.39	891	8874.32	891	7457.91	891	10282.6	891	8600.44
892	8577.58	892	5641.23	892	6099.55	892	5201.74	892	9793.99	892	8743.18	892	11377.5	892	7187.88
893	7826.1	893	5591.14	893	6571.07	893	5642.47	893	11219.9	893	10438.5	893	7950.63	893	7496.09
894	7603.42	894	6009.68	894	6029.94	894	5669.71	894	7872.74	894	5965.34	894	5719.09	894	6907.85
895	7246.45	895	6324.9	895	5818.09	895	5931.37	895	7428.26	895	4807.9	895	6250.05	895	7229.78
896	5962.49	896	5204.43	896	5816.72	896	6029.27	896	8474.65	896	6126.1	896	5609.62	896	5832.54
897	4612.57	897	3953.01	897	4155.38	897	4318.52	897	9169.93	897	7441.21	897	5077.75	897	5725.81
898	4328.99	898	4093.39	898	3836.06	898	3560.51	898	9376.95	898	8128.79	898	4967.13	898	5349.96
899	4679.94	899	4592.52	899	3700.94	899	3468.76	899	10509.5	899	9689.62	899	5501.69	899	6421.68
900	5624.91	900	4730.93	900	4110.15	900	3550.83	900	12299.9	900	12201.5	900	5675.71	900	6276.59
901	6574.34	901	4474.87	901	3920.8	901	3129.82	901	13482.9	901	13085.7	901	7193.11	901	5643.61
902	6895.04	902	3955.76	902	4007.83	902	2953.66	902	13154.5	902	13641.7	902	6253.51	902	5479.14
903	6159.34	903	3448.49	903	4530.84	903	3493.66	903	14942.7	903	13542	903	6269.05	903	6318.92
904	5274.93	904	3674.7	904	5881.77	904	4409.55	904	12193.6	904	11862.3	904	6622.77	904	6965.8
905	4884.73	905	4534.68	905	7293.59	905	6310.99	905	10435.2	905	8777.66	905	5545.17	905	5998.03
906	4947.92	906	4094.87	906	7909.69	906	6753.23	906	11084	906	8179.43	906	7102.84	906	7428.66
907	5130.94	907	3681.54	907	8334.21	907	7215.26	907	8375.24	907	8266.28	907	11092	907	10827.6
908	5684.42	908	3908.01	908	7740.48	908	6604.54	908	10466.2	908	9345.82	908	13389	908	11921.2
909	6402.14	909	4085.47	909	6975.06	909	6029.15	909	6385.44	909	8119.06	909	9640.78	909	7910.94
910	6032.41	910	4197.3	910	6194.95	910	4754.43	910	5441.45	910	7231.22	910	5875.1	910	4825.49
911	5188.45	911	3773.34	911	6826.04	911	4933.06	911	7519.35	911	9661.86	911	6185.14	911	5450.48
912	4412.34	912	3722.37	912	7376.61	912	5344.51	912	7152.97	912	10717.5	912	6263.3	912	5391.14
913	4315.77	913	2711.15	913	8318.44	913	5964.37	913	6414.27	913	9390.83	913	6386.96	913	6896.81
914	4241.58	914	1956.65	914	7578.82	914	5759.33	914	5984.43	914	8210.62	914	6179.63	914	6876.37
915	5601.82	915	2872.21	915	7996.57	915	6070.65	915	4778.48	915	7361.78	915	6881.29	915	7877.05
916	6380.26	916	3478.01	916	7900.46	916	5935.97	916	3530.59	916	5118.8	916	6652.34	916	8085.31
917	6681.81	917	4654.76	917	8972.12	917	6811.38	917	4108.97	917	6089.41	917	6979.14	917	9754.62
918	5225.5	918	4731.41	918	9390.5	918	7626.84	918	3217.57	918	5259.47	918	5849.38	918	9594.52
919	4541.39	919	4505.65	919	8371.63	919	6840.4	919	2779.82	919	4626.15	919	4924.49	919	6370.25
920	4265.62	920	3893.13	920	7807.68	920	6517.93	920	2874.87	920	4727.54	920	5796.79	920	7374.68
921	4889.13	921	4167.85	921	8149.24	921	7119.79	921	3876.24	921	5001.5	921	8818.33	921	11526.3
922	6373.37	922	5654.29	922	8001.48	922	7284.76	922	4156.64	922	4503.39	922	7853.11	922	10144.8
923	7521.43	923	6387.62	923	7514.78	923	6268.77	923	3746.34	923	3949.52	923	8722.3	923	12554.4
924	6585.8	924	5903.54	924	7803.88	924	6075.71	924	4229.65	924	5072.61	924	8413.12	924	10035.2
925	6333.76	925	4978.69	925	7833.14	925	6455.83	925	4494.2	925	5516.16	925	9832.57	925	11000.7
926	5395.4	926	4840.82	926	8659.17	926	6672.92	926	4072.5	926	5437.65	926	8665.51	926	10311.3
927	4107.77	927	3935.99	927	7357.8	927	5998.6	927	5416.79	927	6141.26	927	10437.2	927	13591
928	1838.38	928	1185.35	928	7745.59	928	6214.27	928	6712.33	928	6683.03	928	11871.9	928	14992.3
929	2379.69	929	1802.48	929	8271.13	929	6130.35	929	6478.42	929	6701.15	929	12710.6	929	14283.1
930	4143.1	930	3744.48	930	8910.25	930	6488.17	930	4746.01	930	5402.41	930	13952.8	930	13949.8
931	5230.99	931	5082.55	931	9576.7	931	6901.7	931	4101.9	931	4549.2	931	15140.4	931	14208.5
932	5890.22	932	4859.82	932	10103.2	932	7533.57	932	3596.43	932	3947.58	932	14845.1	932	14911.3
933	6945.65	933	5339.58	933	9650.51	933	7280.4	933	5125.61	933	5913.71	933	12930	933	13209.4
934	7389.75	934	5450.5	934	9796.26	934	7696.9	934	5687.57	934	6358.32	934	11173.8	934	12904.7
935	7308.55	935	5932.11	935	9022.37	935	7395.83	935	6699.92	935	7698.11	935	9509.41	935	10002.8
936	7092.61	936	6668.73	936	9032.6	936	7534.68	936	8173.1	936	7721.38	936	8202.78	936	9735.76
937	6759.05	937	6359.59	937	9117.04	937	7293.49	937	8618.01	937	8551.61	937	6785.27	937	8864.84
938	6328.72	938	5798.17	938	8486.03	938	6872.3	938	7930.04	938	6965.41	938	6945.23	938	8474.68
939	4416.27	939	3648.69	939	8822.86	939	7826.35	939	6321.22	939	5744.87	939	10258.9	939	9048.13
940	4897.75	940	4665.91	940	8550.11	940	7153.65	940	5548.05	940	6244.74	940	10241.2	940	9792.72
941	3349.24	941	2555.06	941	8610.64	941	7039.02	941	6379.22	941	7215.82	941	10171.6	941	6472.31
942	3088.53	942	2262.59	942	8122.7	942	6124.78	942	7856.66	942	8769.69	942	10873.1	942	8965.73
943	3604.08	943	2988.94	943	8276.44	943	6068.97	943	8119.14	943	6697.46	943	6627.98	943	4325.26
944	3744.64	944	3452.67	944	8717.25	944	6306.24	944	7169.74	944	4729.67	944	8982.89	944	7486.89
945	2995.43	945	3003.52	945	8302.99	945	6182.6	945	6526.45	945	4059.99	945	7056.2	945	8289.11
946	2974.29	946	2947.33	946	7552.22	946	5868.75	946	7586.35	946	5736.87	946	7572.48	946	9294.56
947	2813.13	947	2809.59	947	7262.28	947	5977.34	947	6014.18	947	5424.15	947	9029.32	947	10083.4
948	2641.55	948	2573.56	948	8381.49	948	7296.74	948	4463.19	948	4490.21	948	9573.34	948	11043.8
949	2147.9	949	1840.84	949	7628.67	949	6482.33	949	4276.7	949	3544.86	949	8693.5	949	11257.5
950	3239.89	950	2933.88	950	6960.94	950	5715.23	950	4875.93	950	3486.02	950	11340	950	13959.3
951	4100.55	951	3788.86	951	6508.37	951	5607.78	951	4903.55	951	3303.78	951	11704.4	951	13979.2
952	4758.15	952	4741.85	952	6625.53	952	5575.77	952	4850.11	952	3708.02	952	12718.1	952	11717.9
953	5695.73	953	6065.65	953	9191	953	8467.49	953	5570.77	953	4076.22	953	13596.4	953	10807.4
954	7355.44	954	7484.36	954	8137.76	954	7399.57	954	5829.84	954	4595.52	954	14043	954	9004.14
955	8618.95	955	7067.59	955	8655.28	955	7942.11	955	5290.25	955	4561.11	955	14294.1	955	9505.82
956	8069.53	956	6132.57	956	9043.48	956	8382.25	956	5507.87	956	4888.57	956	12668.1	956	10204.8
957	9011.9	957	7798.5	957	9453.62	957	8768.51	957	5192.51	957	5225.15	957	12494	957	10397.2
958	6706.15	958	6407.57	958	10160.7	958	8378.31	958	7257.4	958	8527.6	958	13506.6	958	11693.7
959	5367.58	959	5280.6	959	10408.3	959	7852.47	959	8376.16	959	10113.7	959	14129.3	959	11823.8
960	5160.29	960	5429.56	960	10744.1	960	8125.57	960	9593.23	960	10818.9	960	12605.6	960	10918.3
961	4915.14	961	4954.64	961	10357	961	8349.57	961	10595.1	961	9370.3	961	15506.3	961	12329.9
962	5018.35	962	4669.49	962	10056.8	962	8552.96	962	9235.28	962	8563.44	962	14367.3	962	13098.1
963	4047.51	963	4043.44	963	9107.33	963	7984.4	963	8839.74	963	8837.27	963	20274.3	963	17069.2
964	4884.29	964	5038.81	964	7208.79	964	6763.9	964	8859.99	964	11286.5	964	20677.4	964	17246.1
965	6121.41	965	5708.34	965	6470.89	965	5769.22	965	9848.32	965	10638	965	19107.7	965	17382.5
966	5316.41	966	4943.81	966	5958.63	966	5078.66	966	9606.37	966	10271	966	19316.2	966	17999.2
967	3958.41	967	3352.95	967	5770.05	967	4603.14	967	9506.4	967	6537.38	967	17924.8	967	18304.6
968	3334.77	968	2496.8	968	5663.85	968	4010.86	968	9065.57	968	6263.04	968	21612	968	19244.2
969	4048.95	969	3354.43	969	5985.46	969	4164.35	969	6186.32	969	5388.94	969	20424.8	969	18632.5
970	2110.8	970	1617.45	970	5714.6	970	4226.07	970	5838.61	970	5159.28	970	18389.7	970	17170.3
971	969.257	971	797.921	971	5741.57	971	4326.36	971	5172.06	971	3678.09	971	18488	971	16495.9
972	1602.99	972	1551.5	972	5730.65	972	4062.32	972	5240.96	972	4299.55	972	23928.5	972	17040
973	1227.02	973	1059.48	973	5442.35	973	3920.07	973	4655.77	973	4745.99	973	22178.2	973	17268.4
974	355.556	974	354.203	974	5827.47	974	4447.52	974	4961.32	974	5970.08	974	21418.2	974	17648.4
975	438.548	975	311.62	975	5706.39	975	4933.89	975	5872.75	975	7047.24	975	25876.2	975	20486.3
976	614.488	976	449.315	976	6693.78	976	5220.69	976	6956.91	976	8521.67	976	27052.9	976	21099.7
977	326.31	977	291.91	977	6562.5	977	4973.39	977	7662.51	977	8021.7	977	32049.8	977	24695.9
978	301.754	978	303.481	978	7470.39	978	5744.81	978	7506.11	978	7684.06	978	31102.5	978	24147.6
979	669.286	979	604.536	979	7606.33	979	5824.72	979	9289.87	979	12136.1	979	26755.6	979	22005.7
980	1402.19	980	1214.79	980	7619.4	980	5876.8	980	14733.1	980	16118.2	980	21835.6	980	19479.4
981	2237.15	981	1571.39	981	7379.16	981	5799.08	981	15350.8	981	13939	981	20355	981	18384.9
982	2614.4	982	1857.22	982	6828.95	982	5508.55	982	13072.4	982	13569.1	982	20720.4	982	17771.7
983	3238.5	983	2663.91	983	6701.76	983	5752.75	983	11772.9	983	12384.5	983	20591.7	983	18229.1
984	4737.69	984	3923.24	984	6257.76	984	5140	984	9694.75	984	8435.09	984	18457.2	984	14285.9
985	6115.1	985	5317.75	985	5842.74	985	4865.62	985	9782.53	985	7423.99	985	18437.4	985	16396.6
986	5157.09	986	4916.12	986	6021.81	986	5181.65	986	8907.57	986	6789.24	986	14797.5	986	12229.3
987	3914.04	987	3710.2	987	6027.4	987	5037.47	987	8593.68	987	6511.88	987	13993.3	987	13307
988	3227.49	988	2833.45	988	5884.24	988	5137.2	988	9047.14	988	6799.82	988	15327.3	988	14216.4
989	2769	989	2675.92	989	6276.55	989	5312.4	989	9012.81	989	5272.12	989	15881.2	989	14975.9
990	2915.19	990	2302.24	990	7303.32	990	5596.37	990	7699.1	990	4447.27	990	24357.7	990	20449.3
991	2878.39	991	2389.4	991	6508.02	991	4666.72	991	8613.69	991	5812.47	991	20712.4	991	17951.3
992	3106.54	992	2822.7	992	6134.17	992	4396.11	992	7707.69	992	5517.05	992	21957	992	17339.6
993	3835.64	993	3724.18	993	5584.34	993	4562.89	993	6527.51	993	4051.38	993	20354.7	993	16056
994	4500.41	994	4147.44	994	5474.6	994	4261.01	994	8065.98	994	5413.45	994	17779.5	994	15760.1
995	4764.93	995	4250.86	995	5505.84	995	4019.87	995	9657.89	995	6797.02	995	15915.8	995	18030.2
996	4020.89	996	3786.52	996	5770.9	996	4024.11	996	10594.1	996	7729.92	996	14607.9	996	18456.9
997	4414.4	997	3408.1	997	6043.96	997	4001.75	997	11521.2	997	8943.97	997	12916.4	997	18279.2
998	5832.1	998	4108.46	998	5695.32	998	3697.4	998	12186.9	998	10035.8	998	16024	998	17079.2
999	7696.41	999	5275.52	999	6308.51	999	4343.58	999	11996.7	999	10550.4	999	13255.6	999	16154.9
1000	9085.99	1000	5703.94	1000	5932.59	1000	4330.8	1000	9517.46	1000	9867.01	1000	11925.8	1000	16056.4
1001	9374.5	1001	6057.78	1001	6053.22	1001	4377.48	1001	6736.57	1001	7028.41	1001	17434.9	1001	16893
1002	9993.45	1002	7224.07	1002	6325.27	1002	4669.21	1002	4712.13	1002	4916	1002	15070.3	1002	16612.4
1003	12407.6	1003	9343.41	1003	6636	1003	4951.68	1003	5725.15	1003	3626.76	1003	15762.9	1003	15971.3
1004	12991.6	1004	9992.98	1004	7043.98	1004	5631.19	1004	7575.29	1004	5439.52	1004	20179.1	1004	18524
1005	15515.5	1005	12095.5	1005	7477.35	1005	5841.78	1005	5760.97	1005	6680.89	1005	18733.1	1005	16850.7
1006	17012.1	1006	12743.7	1006	7691.49	1006	5831.04	1006	4324.35	1006	4537	1006	18026.8	1006	15879.7
1007	18316	1007	13998	1007	6873.7	1007	4421.63	1007	4956.13	1007	4054.44	1007	21209.3	1007	16857.9
1008	18119.6	1008	13939.3	1008	5711.31	1008	3936.91	1008	6502.26	1008	3952.24	1008	19602	1008	16824.5
1009	19672.5	1009	14408	1009	5092.42	1009	3696.38	1009	7357.61	1009	4620.37	1009	17172.7	1009	16294.2
1010	17052.1	1010	12764.8	1010	5240.71	1010	3572.92	1010	8901.69	1010	4587.11	1010	14487.9	1010	14792.1
1011	17583.6	1011	13308.8	1011	5405.05	1011	4194.46	1011	11262.2	1011	5756.43	1011	16053.6	1011	16547
1012	16490.7	1012	13182.2	1012	5373.45	1012	4039.46	1012	11328.5	1012	6436.39	1012	14288	1012	14146.2
1013	14990.6	1013	11305.7	1013	5729.56	1013	4754.63	1013	9096.51	1013	5758.97	1013	12862.8	1013	13589.6
1014	13881.3	1014	9952.18	1014	5846.53	1014	4669.32	1014	7240.52	1014	6027.75	1014	17377.1	1014	17345
1015	14449.7	1015	10504	1015	6349.27	1015	5440.99	1015	5870.64	1015	6025.62	1015	16375.4	1015	16542.4
1016	11816.2	1016	8726.88	1016	5554.9	1016	4820.66	1016	5844.37	1016	6304.41	1016	16336.8	1016	16210.2
1017	6885.5	1017	4834.38	1017	6038.81	1017	5460.96	1017	5144.28	1017	6130.25	1017	17373.8	1017	14836.8
1018	7928	1018	5643.54	1018	5938.83	1018	4749.38	1018	4185.82	1018	4809.01	1018	19336.5	1018	16904.6
1019	9174.59	1019	6451.22	1019	5455.55	1019	4437.44	1019	3810	1019	4831.75	1019	20688.5	1019	17784.8
1020	11257.7	1020	7403.08	1020	5494.06	1020	4681.86	1020	7230.86	1020	7822.05	1020	22991.7	1020	19883.5
1021	6214.37	1021	3359.45	1021	5273.36	1021	5081.32	1021	8427.65	1021	8875.34	1021	26105.9	1021	20539.6
1022	8013.15	1022	4712.46	1022	5781.47	1022	5241.1	1022	7792.89	1022	7606.65	1022	25446.8	1022	20618.8
1023	3089.31	1023	1504.8	1023	6588.56	1023	5595.02	1023	6284.2	1023	4962.3	1023	26091.9	1023	21027.8
1024	5553.14	1024	3169.01	1024	6875.26	1024	5824.25	1024	6076.45	1024	4501.91	1024	23789	1024	19889.1
1025	5124.56	1025	3236.64	1025	7010.59	1025	6107.84	1025	4756.65	1025	3784.04	1025	22185.6	1025	19037.2
1026	2094.95	1026	1191.03	1026	7139.97	1026	6305.51	1026	3338.3	1026	3190.54	1026	20206.6	1026	19401.7
1027	2341.55	1027	1446.79	1027	7129.62	1027	6271.62	1027	2100.76	1027	2009.39	1027	17658.5	1027	17095.4
1028	2438.32	1028	1523.41	1028	7539.08	1028	6826.31	1028	1943.91	1028	1915.42	1028	18651.5	1028	17609.5
1029	2966.85	1029	1699.08	1029	7880.03	1029	6190	1029	2517.03	1029	2660.39	1029	14952.1	1029	13780.5
1030	1147.33	1030	974.148	1030	8430.04	1030	6422.88	1030	3416.41	1030	2317.41	1030	14099	1030	13974
1031	2042.98	1031	1516.94	1031	7885.52	1031	6155.45	1031	4860.03	1031	3127.32	1031	13172.8	1031	13949.9
1032	1297.8	1032	1013.47	1032	7823.26	1032	6184.09	1032	5407.52	1032	4647.1	1032	14042.9	1032	14590.4
1033	1284.3	1033	1084.3	1033	6819.61	1033	5526.86	1033	6009.83	1033	5506.33	1033	14289.7	1033	14388.9
1034	1372.65	1034	1244.37	1034	6740.5	1034	5528.99	1034	5933.72	1034	5441.25	1034	14712.8	1034	15307.9
1035	1830.17	1035	1981.9	1035	6371.1	1035	5393.78	1035	5864.72	1035	5406.23	1035	17854.7	1035	17984.4
1036	2214.24	1036	2606.03	1036	6892.9	1036	5474.15	1036	5217.68	1036	4710.29	1036	16266.3	1036	16498.1
1037	3012.57	1037	3564.65	1037	6576.07	1037	5457	1037	3982.23	1037	3156.82	1037	18608.4	1037	18664.6
1038	5791.78	1038	6031.97	1038	6027.97	1038	5099.13	1038	3814.55	1038	3463.28	1038	20746.2	1038	18872.5
1039	6873.4	1039	6981.56	1039	5581.22	1039	4850.1	1039	2545.03	1039	2076.34	1039	20121	1039	16667.3
1040	10474.7	1040	9235.61	1040	5776.23	1040	4459.82	1040	2744.57	1040	1656.84	1040	18647.9	1040	13984
1041	10761.2	1041	9047.18	1041	6136.99	1041	4091.28	1041	2568.81	1041	1357.84	1041	16123	1041	13358.3
1042	11230.5	1042	10100.4	1042	6263.46	1042	4708.47	1042	4112.08	1042	2023.82	1042	16206.7	1042	13416.3
1043	10266.4	1043	9041.8	1043	7175.89	1043	5190.38	1043	4546.77	1043	3487.35	1043	18432.2	1043	14824.3
1044	8101.09	1044	7018.94	1044	6870.72	1044	4420.4	1044	4010.14	1044	3506.84	1044	18467.1	1044	17207.3
1045	8608.07	1045	7056.19	1045	6613.61	1045	4439.59	1045	3801.61	1045	4336.04	1045	18733.8	1045	17904.8
1046	7144.08	1046	5362.75	1046	7241.51	1046	4875.07	1046	2394.86	1046	1895.86	1046	16900.8	1046	17399.2
1047	6089.98	1047	5143.01	1047	6979.38	1047	4733.25	1047	3619.43	1047	3319.64	1047	16905.5	1047	17239.7
1048	4410.11	1048	4687.22	1048	6953.17	1048	5070.12	1048	6272.34	1048	5081.67	1048	18186.4	1048	18666.5
1049	4232.43	1049	4143.43	1049	6282.13	1049	4379.33	1049	7675.07	1049	6901.92	1049	20743.5	1049	20154.9
1050	4991.13	1050	4231.66	1050	5900.72	1050	4364.69	1050	9240.29	1050	8147.78	1050	20658.2	1050	19430
1051	4587.64	1051	4476	1051	5399.15	1051	4315.65	1051	10233	1051	9773.14	1051	21271.7	1051	19850.8
1052	3562.13	1052	3934.84	1052	5793.24	1052	4317.53	1052	9218.25	1052	8994.95	1052	22566.4	1052	19640.4
1053	4645.96	1053	4539	1053	5623.82	1053	4907.34	1053	7690.15	1053	7272.02	1053	22704	1053	16724.8
1054	6314.98	1054	5690.04	1054	5294.02	1054	4483.73	1054	7933.49	1054	7788.25	1054	18826.8	1054	13177.1
1055	7763.65	1055	6814.33	1055	5469.62	1055	5146.35	1055	7483.79	1055	8541.73	1055	15526	1055	12762.6
1056	12298.8	1056	10383.8	1056	6140.3	1056	5013.19	1056	7523.95	1056	7134.11	1056	13654.7	1056	14625.5
1057	13317.8	1057	10184.9	1057	6043.41	1057	4806.55	1057	8805.32	1057	6542.89	1057	15726.1	1057	15436.1
1058	18908.4	1058	14295.3	1058	6148.33	1058	5079.73	1058	6872.14	1058	4047.97	1058	16036	1058	17450.2
1059	16354.8	1059	11709	1059	5987.22	1059	5653.36	1059	4797.48	1059	2706.61	1059	17390.6	1059	15733.6
1060	13739.6	1060	10861.3	1060	6487.38	1060	6724.86	1060	3641.11	1060	2304.94	1060	18488.7	1060	14064.9
1061	11030.7	1061	9418.91	1061	5744.54	1061	4568.42	1061	3228.84	1061	2339.34	1061	18666.5	1061	16132.7
1062	9671.19	1062	8821.42	1062	6750.08	1062	6384.37	1062	2765.5	1062	2290.69	1062	18765.5	1062	16007.2
1063	8189.54	1063	7632.25	1063	5973.47	1063	6389.85	1063	2172.37	1063	1582.82	1063	19321.6	1063	16452.5
1064	7128.08	1064	7087.38	1064	5737.57	1064	6101.6	1064	3400.24	1064	2289.71	1064	20176.8	1064	17111.2
1065	4287.26	1065	3119.1	1065	5109.43	1065	5046.4	1065	5521.5	1065	2795.23	1065	20615.2	1065	17257.2
1066	5524.97	1066	4579.33	1066	5117.32	1066	4394.8	1066	6454.21	1066	4595.19	1066	21200.2	1066	17585.9
1067	5039.63	1067	3482.46	1067	4601.5	1067	4436.64	1067	7394.98	1067	6716.69	1067	22795.7	1067	18733.1
1068	4506.81	1068	3567.98	1068	4646.75	1068	4381.43	1068	8312.92	1068	5889.72	1068	24852.5	1068	20784
1069	4369.31	1069	4153.42	1069	5104.26	1069	5034.39	1069	7247.28	1069	4719.3	1069	24768.4	1069	21768.1
1070	5574.68	1070	5056.03	1070	4861.83	1070	4624.1	1070	5687.48	1070	4199.05	1070	26323.7	1070	23424.9
1071	6502.69	1071	5394	1071	4516.33	1071	4258.48	1071	2537.97	1071	1135.42	1071	25679	1071	21565.3
1072	5021.02	1072	4273.45	1072	4879.62	1072	4862.18	1072	1825.47	1072	1000.35	1072	22442.7	1072	18468.3
1073	4194.67	1073	3319.44	1073	4915.92	1073	4607.83	1073	2187.65	1073	1015.92	1073	20217.9	1073	15905.1
1074	3315.16	1074	3100.84	1074	5319.24	1074	4914.46	1074	4261.03	1074	1441.63	1074	19532.4	1074	15982
1075	4328.53	1075	3415.78	1075	5304.65	1075	4319.45	1075	6362.73	1075	2840.16	1075	18171.3	1075	16252
1076	3257	1076	2863.04	1076	5435.71	1076	4682.85	1076	7147.51	1076	4819.6	1076	16054.8	1076	14762.4
1077	2225.58	1077	2373.06	1077	5743.79	1077	5391.35	1077	8549.92	1077	7251.6	1077	14690.6	1077	12885.6
1078	2335.29	1078	2262.4	1078	5527.78	1078	3818.68	1078	5104.08	1078	7340.56	1078	11382.6	1078	10911.9
1079	1155.64	1079	1291.72	1079	5682.44	1079	4434.33	1079	3071.22	1079	5813.25	1079	10541.2	1079	7429.83
1080	513.477	1080	481.405	1080	4107.14	1080	3119.89	1080	2775.14	1080	5222.03	1080	10292.5	1080	7843.93
1081	544.771	1081	511.662	1081	4492.45	1081	2923.36	1081	3633.71	1081	5464.51	1081	10445.1	1081	9749.08
1082	330.615	1082	1040.98	1082	6410.13	1082	3828.37	1082	5460.28	1082	5438.52	1082	11586.3	1082	10889.4
1083	1125.5	1083	1942.01	1083	6443.1	1083	3909.44	1083	6687.96	1083	4769.59	1083	11755.6	1083	10081
1084	2097.2	1084	2376.25	1084	6464.51	1084	4326.31	1084	6966.17	1084	3889.91	1084	13075.7	1084	9622.74
1085	4312.63	1085	3460.78	1085	4990.06	1085	3427.86	1085	7244.35	1085	3821.61	1085	12988.9	1085	9738.96
1086	6084.59	1086	4382.31	1086	6378.33	1086	4350.86	1086	8169.55	1086	4393.69	1086	13754.6	1086	11899.9
1087	6816.94	1087	4640.31	1087	5680.42	1087	4615.88	1087	9037.54	1087	5031.23	1087	11929.2	1087	8297.99
1088	7254.98	1088	4875.94	1088	5771.32	1088	5288.44	1088	9345.3	1088	5610.42	1088	13700.2	1088	10943.6
1089	6565.05	1089	4916.45	1089	5730.57	1089	5927.09	1089	8488.84	1089	5636.85	1089	12599.9	1089	10622
1090	5311.73	1090	4490.04	1090	5551.02	1090	5772.35	1090	8608.33	1090	6037.5	1090	12052.8	1090	10976.5
1091	4532.91	1091	3874.14	1091	5372.57	1091	6063.53	1091	5904.89	1091	4971.78	1091	11834.9	1091	11542.5
1092	5577.48	1092	4833.61	1092	5194.08	1092	5384.09	1092	4305.65	1092	3739.95	1092	11456.1	1092	10772.9
1093	6913.41	1093	6461.33	1093	4604.8	1093	4314.41	1093	4740.51	1093	4034.06	1093	10911.5	1093	13716.8
1094	6768.69	1094	6938.9	1094	4848	1094	4173.48	1094	5294.14	1094	4610.32	1094	10359.2	1094	12300.1
1095	6338.86	1095	6256.82	1095	4486.74	1095	3045.58	1095	6766.79	1095	5518.26	1095	11539.3	1095	12101
1096	7254.71	1096	7486.7	1096	4926.27	1096	2733.56	1096	6686.38	1096	4236.29	1096	11274.5	1096	10824.8
1097	6851.96	1097	6031.23	1097	5027.7	1097	2473.68	1097	8010.41	1097	4398.71	1097	9111.39	1097	8654.81
1098	6264.05	1098	4993.1	1098	4788.02	1098	2723.97	1098	6986.66	1098	4702.83	1098	5844.93	1098	7205.69
1099	6658.32	1099	5625.12	1099	4323.75	1099	3046.47	1099	5906.96	1099	4400.06	1099	5986.52	1099	6681.44
1100	7683.3	1100	6443.02	1100	4684.1	1100	3864.9	1100	5783.09	1100	6150.14	1100	3492.46	1100	4737.98
1101	8998.97	1101	6724.17	1101	4461.77	1101	3859.49	1101	4742.15	1101	5030.11	1101	6167.42	1101	6923.57
1102	9326.48	1102	5876.73	1102	4990.9	1102	4114.21	1102	4637.76	1102	4465.14	1102	8237.54	1102	8688.73
1103	8835.41	1103	5637.53	1103	4783.16	1103	3837.95	1103	7810.24	1103	8462.17	1103	7716.1	1103	8134
1104	9321.65	1104	6761.4	1104	4552.18	1104	3165.7	1104	8129.56	1104	8551.93	1104	10118	1104	9793.94
1105	9206.64	1105	7437.01	1105	4786.92	1105	3352.9	1105	7879.83	1105	7643.54	1105	11862.4	1105	10806.8
1106	9387.82	1106	7369.66	1106	4817.6	1106	3309.15	1106	8311.37	1106	7769.05	1106	7072.45	1106	7283.97
1107	9382.97	1107	6927.85	1107	4457.56	1107	3304.59	1107	8630.68	1107	8768.24	1107	4371.56	1107	4115.95
1108	8742.18	1108	6169.06	1108	4129.23	1108	3596.37	1108	8740.24	1108	8018.43	1108	4737.82	1108	5297.62
1109	9072.38	1109	6534.51	1109	3865.3	1109	3958.05	1109	8909.24	1109	7299.8	1109	2116.62	1109	1799.02
1110	8971.87	1110	6670.1	1110	2695.98	1110	2804.15	1110	8111.65	1110	6953.18	1110	1196.74	1110	1276.68
1111	8489.23	1111	6534.14	1111	3526.07	1111	3709.94	1111	6953.3	1111	6631.18	1111	908.384	1111	484.559
1112	8796.55	1112	7281.48	1112	4248.67	1112	4345.14	1112	6319.13	1112	6091.77	1112	297.482	1112	342.541
1113	8439.8	1113	6926.93	1113	3935.75	1113	3329.88	1113	6632.49	1113	6027.24	1113	1539.92	1113	1752.97
1114	8072.09	1114	6803.47	1114	3677.9	1114	2460.26	1114	5569.55	1114	5434.4	1114	3791.4	1114	2748.57
1115	7350.16	1115	6035.78	1115	4306.77	1115	3283.01	1115	6387.71	1115	6298.71	1115	2881.27	1115	2167.85
1116	6271.88	1116	4923.12	1116	6268.94	1116	4515.14	1116	7169.37	1116	6100.39	1116	2993.07	1116	3295.03
1117	5608.16	1117	4129.8	1117	7385.02	1117	5845.24	1117	8316.33	1117	7043.87	1117	1995.49	1117	2676.09
1118	4004.37	1118	3099.3	1118	7604.18	1118	6324.23	1118	8169.3	1118	8477.11	1118	2211.93	1118	2800.95
1119	4734.37	1119	3505	1119	8449.28	1119	6735.56	1119	7748.86	1119	8629.79	1119	2742.49	1119	2545.02
1120	4328.53	1120	2752.94	1120	8741.9	1120	6911.46	1120	7007.4	1120	8462.95	1120	2561.32	1120	2188.51
1121	3937.33	1121	2319.41	1121	8970.26	1121	5953.89	1121	6871.71	1121	8266.12	1121	1885.28	1121	961.393
1122	6112.06	1122	4396.38	1122	9758.48	1122	7137.27	1122	6762.23	1122	8026.35	1122	1127.64	1122	968.499
1123	7795.65	1123	5857.66	1123	9917.44	1123	7278.81	1123	6614.64	1123	8538.87	1123	1979.16	1123	897.228
1124	7888.87	1124	5889.95	1124	8234.3	1124	5697.99	1124	6659.53	1124	8992.71	1124	667.595	1124	399.228
1125	8600.33	1125	6184.63	1125	8456.81	1125	6885.35	1125	6367.18	1125	8535.75	1125	1145.78	1125	1004.72
1126	8127.89	1126	6088.47	1126	7101.89	1126	5746.51	1126	5986.88	1126	7830.11	1126	4187.52	1126	4684.94
1127	7307.47	1127	5766.67	1127	7526.67	1127	6148.64	1127	7360.21	1127	7590.8	1127	3646.35	1127	4589.13
1128	5638.25	1128	5116.9	1128	7921.58	1128	5695.81	1128	9110.46	1128	7343.4	1128	6088.66	1128	7297.81
1129	5245.22	1129	4559.06	1129	7620.71	1129	4756.46	1129	8988.11	1129	7339.35	1129	7778.22	1129	9174.41
1130	6242.19	1130	5240.36	1130	5577.25	1130	3012.88	1130	8826.43	1130	7621.31	1130	6013.07	1130	7541.31
1131	7202.39	1131	5579.21	1131	7914.66	1131	4801.65	1131	7927.94	1131	7734.56	1131	4177.84	1131	5086.16
1132	6846.73	1132	5676.02	1132	8220.97	1132	6038.73	1132	6239.46	1132	6360.9	1132	3854.13	1132	5492.39
1133	6868.63	1133	5647.65	1133	8028.82	1133	6100.69	1133	5979.38	1133	6045.66	1133	2235.26	1133	3319.07
1134	7008.48	1134	6636.65	1134	7165.42	1134	5539.45	1134	6393.25	1134	5481.98	1134	1756.8	1134	2611.19
1135	6459.62	1135	7276.78	1135	6598.22	1135	4111.7	1135	6543.04	1135	5130.95	1135	2213	1135	3504.54
1136	6097.97	1136	6994.81	1136	5555.94	1136	3233.49	1136	6228.8	1136	3524.56	1136	2907.25	1136	3461.93
1137	6736.06	1137	7785.99	1137	5626.02	1137	3446.66	1137	4431.04	1137	2719.63	1137	3615.52	1137	3147.43
1138	6142.94	1138	7170.91	1138	4988.09	1138	2487.41	1138	5322.68	1138	2419.41	1138	4001.66	1138	4176.21
1139	7958.64	1139	7224.56	1139	3622.74	1139	2017.41	1139	5870.96	1139	2720.93	1139	3626.19	1139	3806.87
1140	7166.46	1140	6745.26	1140	3980.38	1140	2617.83	1140	6172.03	1140	2666.04	1140	4907.42	1140	4803.4
1141	8423.5	1141	7046.38	1141	4282.55	1141	2777.62	1141	5922.26	1141	2165.86	1141	6139.36	1141	5921.19
1142	8566.4	1142	6245.96	1142	3744.45	1142	2525.62	1142	2359.89	1142	1322.69	1142	5571.84	1142	5348.28
1143	8533.01	1143	6238.76	1143	3865.73	1143	2273.08	1143	1137.72	1143	1053.54	1143	6250.37	1143	6620.33
1144	9153.7	1144	6650.25	1144	2798.08	1144	1789.57	1144	807.284	1144	799.259	1144	7203.47	1144	8043.42
1145	9219.85	1145	6848.37	1145	3153.43	1145	1794.61	1145	908.526	1145	655.77	1145	7402.77	1145	8265.47
1146	7488.95	1146	5607.16	1146	4655.89	1146	2332.22	1146	1049.06	1146	689.719	1146	9042.64	1146	8281.06
1147	8186.71	1147	5766.37	1147	6088.09	1147	2896.27	1147	479.845	1147	636.912	1147	6912.37	1147	6854.34
1148	6520.66	1148	4392.76	1148	5868.05	1148	3038.83	1148	730.346	1148	193.288	1148	7699.56	1148	7715.36
1149	6399.02	1149	4437.83	1149	6316.57	1149	3336.61	1149	751.259	1149	452.815	1149	5511.47	1149	5727.06
1150	6467.53	1150	4847.74	1150	7672.15	1150	4474.6	1150	1129.6	1150	230.501	1150	5511.81	1150	6275.53
1151	6721.35	1151	5843.68	1151	8334.55	1151	5288.24	1151	1494.99	1151	1253.63	1151	2844.8	1151	3167.06
1152	7174.6	1152	6031.83	1152	10214	1152	6563.61	1152	2091.45	1152	1634.83	1152	2016.92	1152	2514.43
1153	7002.79	1153	6709.9	1153	12119.1	1153	7364.99	1153	3266	1153	2522.29	1153	1847.98	1153	2235.8
1154	6403.38	1154	6555.56	1154	14031.2	1154	8755.56	1154	4169.11	1154	1948.97	1154	1506.87	1154	2842.24
1155	6731.89	1155	6627.99	1155	16136.1	1155	10620.4	1155	4209.52	1155	3055.03	1155	2210.19	1155	3670.34
1156	8754.05	1156	8396.6	1156	16135.4	1156	11490.7	1156	4828.78	1156	3698.74	1156	4353.69	1156	5731.64
1157	9410.98	1157	8600.43	1157	15167.8	1157	12258.7	1157	5313.38	1157	2962.88	1157	4549.62	1157	5626.34
1158	9931.3	1158	8969.08	1158	14160.4	1158	12862.5	1158	8316.54	1158	4664.43	1158	7558.63	1158	8573.16
1159	11822.9	1159	9573.34	1159	14017.6	1159	12927.7	1159	8316.29	1159	4634.25	1159	8193.84	1159	9397.59
1160	11559.5	1160	10051.4	1160	14180.1	1160	12854.6	1160	9522.69	1160	5495.51	1160	8625.84	1160	7144.1
1161	11485.2	1161	10094.9	1161	14159.3	1161	11720.2	1161	10445.5	1161	6044.41	1161	8053.59	1161	4374.81
1162	9817.52	1162	8830.6	1162	14422.6	1162	11725.7	1162	12146.5	1162	6750.26	1162	9395.93	1162	5928.29
1163	10513.9	1163	9899.08	1163	15935	1163	13311.9	1163	12278	1163	7664.94	1163	11990	1163	9382.33
1164	7545.43	1164	6736.36	1164	15452.7	1164	13337	1164	11404.6	1164	8019.68	1164	12077.4	1164	9543.27
1165	7636.59	1165	6291.94	1165	16439.8	1165	13393.6	1165	13447.7	1165	8310.62	1165	13729.1	1165	11084.2
1166	5001.39	1166	3860.09	1166	14946.8	1166	13773	1166	13301.5	1166	10583.3	1166	13893.9	1166	13090.2
1167	4904.4	1167	4193.06	1167	14102.2	1167	12930.9	1167	13137	1167	10949.4	1167	14355.3	1167	12075.6
1168	5264.6	1168	5065.23	1168	12237.1	1168	11448.5	1168	13270.7	1168	11743.6	1168	15657	1168	11610.8
1169	6347.96	1169	6079.25	1169	12663.1	1169	10626	1169	12370.9	1169	11661.4	1169	16995.2	1169	12945.1
1170	9674.96	1170	8748.82	1170	11452.7	1170	9076.52	1170	11987.9	1170	12101.5	1170	15943.8	1170	12624.2
1171	9760.85	1171	8148.84	1171	10949.8	1171	8828.24	1171	10989.5	1171	11325.4	1171	12501.5	1171	10445.5
1172	9378.97	1172	7273.25	1172	10051.8	1172	8704.56	1172	11095.7	1172	11412.7	1172	9774.91	1172	8394.73
1173	9842.24	1173	7720.42	1173	9552.46	1173	8748.58	1173	11500.6	1173	10788.6	1173	7584.14	1173	6211.02
1174	11577.4	1174	9537.49	1174	11587	1174	10667.1	1174	12076.4	1174	9924.91	1174	7497.38	1174	6600.04
1175	12878.2	1175	10752.2	1175	10569.8	1175	9458.94	1175	13179.7	1175	9735.46	1175	7566.3	1175	6784.75
1176	14016.3	1176	11094.7	1176	11141.4	1176	9882.47	1176	13154.4	1176	10079.7	1176	6138.75	1176	5116.34
1177	12325.2	1177	9284.95	1177	11512.2	1177	9617.94	1177	14407	1177	12360.7	1177	4603.98	1177	3857.73
1178	9194.86	1178	6701.91	1178	11246.1	1178	9478.92	1178	13622.7	1178	12492.4	1178	6123.48	1178	5177.95
1179	6397.66	1179	5008.81	1179	10322.1	1179	8253.22	1179	14000.5	1179	14061.9	1179	7516.23	1179	5454.6
1180	10566.1	1180	8062.55	1180	9040.18	1180	7038.28	1180	15473	1180	15308.6	1180	7582.57	1180	5075.94
1181	10895.2	1181	8117.11	1181	9012.47	1181	6062.73	1181	14197	1181	12622.5	1181	9798.44	1181	9060.08
1182	12838.5	1182	9738.22	1182	10880.6	1182	7660.94	1182	12000.4	1182	10883.4	1182	7941.2	1182	8469.43
1183	13594.1	1183	10674.9	1183	9766.82	1183	6795.07	1183	8805.24	1183	8619.26	1183	6791.87	1183	7682.39
1184	13116.5	1184	9831.94	1184	11677.5	1184	8959.57	1184	7730.76	1184	7476.56	1184	7108.91	1184	6867.61
1185	10734.5	1185	8481.46	1185	10447.8	1185	7432.6	1185	7924.98	1185	7823.85	1185	8441.04	1185	9502.87
1186	7590.78	1186	6307.42	1186	10651.3	1186	7576.48	1186	7865.17	1186	7784.41	1186	9544.39	1186	9989.49
1187	6511.32	1187	4589.81	1187	11168.1	1187	7157.44	1187	7850.89	1187	5876.3	1187	10287.9	1187	9578.96
1188	6390.61	1188	5365.85	1188	10228.5	1188	6324.16	1188	7578.72	1188	6978.7	1188	11730.7	1188	11016.1
1189	5953.33	1189	4176.43	1189	8660.91	1189	5412.16	1189	7631.35	1189	7148.01	1189	13858.8	1189	15131.7
1190	4033.02	1190	2946.51	1190	8064.06	1190	5290.59	1190	8248.47	1190	7093.84	1190	11398.6	1190	13254.8
1191	5528.97	1191	3978.01	1191	7541.77	1191	4598.28	1191	7766.66	1191	7165.15	1191	12601.2	1191	16014.6
1192	4347.55	1192	3066.53	1192	7468.58	1192	4745.02	1192	7857.56	1192	6665.13	1192	14772.7	1192	18791.6
1193	4407.18	1193	3092.01	1193	7218.41	1193	4826.4	1193	8917.92	1193	7210.61	1193	12175.8	1193	16505.5
1194	5994.9	1194	4059.63	1194	8357.22	1194	5527.16	1194	7877.65	1194	6853.06	1194	13361.8	1194	16315.8
1195	8031.52	1195	5651.59	1195	8757.6	1195	5850.1	1195	9479.78	1195	7913.11	1195	9911.9	1195	13649.9
1196	6673.52	1196	4580.51	1196	9526.37	1196	6912.56	1196	9655.18	1196	8327.51	1196	9550.4	1196	12727.1
1197	5755.92	1197	4209.42	1197	9723.19	1197	7663.21	1197	7947.29	1197	7956.17	1197	7916.83	1197	10278.3
1198	4705.99	1198	4081.75	1198	8998.85	1198	6475.54	1198	6648.32	1198	6745.55	1198	7597.16	1198	9472.56
1199	5958.5	1199	4987.1	1199	7594.57	1199	6219.52	1199	4707.12	1199	4541.45	1199	5943.43	1199	7763.65
1200	4712.9	1200	3958.96	1200	7185.09	1200	5341.11	1200	3880.95	1200	3404.74	1200	7566.12	1200	8442.64
1201	3842.39	1201	3187.33	1201	5372.81	1201	4451.4	1201	4242.59	1201	2991.07	1201	5720.49	1201	6830.16
1202	2822.32	1202	2676.66	1202	4217.69	1202	2893.56	1202	5252.53	1202	3485.37	1202	8679.38	1202	10141.5
1203	2333.78	1203	1999.15	1203	4157.93	1203	2617.39	1203	6872.81	1203	5628.1	1203	10134.1	1203	12526
1204	3484	1204	2565.83	1204	5320.34	1204	3963.4	1204	7713.2	1204	6276.64	1204	9359.93	1204	11815.1
1205	4817.41	1205	3349.78	1205	6697.03	1205	5871.21	1205	7568.23	1205	7421.04	1205	12278.1	1205	15547.2
1206	6260.12	1206	5088.09	1206	6658.72	1206	6172.75	1206	7557.2	1206	6709.98	1206	12142.1	1206	13020
1207	6487.69	1207	5101.07	1207	5200.77	1207	5219.92	1207	5771.22	1207	4843.73	1207	12881.4	1207	14087.1
1208	5692.27	1208	3739.19	1208	4500.88	1208	3758.13	1208	5805.16	1208	4422	1208	12744.7	1208	15067.9
1209	5435.75	1209	3775.17	1209	5645.65	1209	4254.86	1209	6201.35	1209	5218.41	1209	10713.2	1209	12232.8
1210	4486.16	1210	3043.02	1210	5737.99	1210	3886.93	1210	5551.61	1210	5344.5	1210	12033.9	1210	9916.83
1211	3927.78	1211	3003.66	1211	5209.97	1211	3681.68	1211	4742.26	1211	5315.65	1211	10768	1211	10181.4
1212	3231.07	1212	2392.22	1212	4784.11	1212	3419.62	1212	5483.84	1212	5920.34	1212	9337.87	1212	8040.32
1213	2654.21	1213	1998.36	1213	4648.86	1213	2616.02	1213	6389.45	1213	6015.61	1213	7428.3	1213	7019.76
1214	2953.34	1214	1776.77	1214	5516.28	1214	3487.86	1214	7534.66	1214	7125.88	1214	6525.17	1214	7287.34
1215	3074.46	1215	1456.99	1215	5654.68	1215	3087.61	1215	10115.9	1215	8642.02	1215	6630.75	1215	8463.76
1216	4134.61	1216	2121.85	1216	6976.49	1216	3882.36	1216	12390.4	1216	9628.71	1216	6373.53	1216	8985.02
1217	4989.62	1217	2985	1217	8575.16	1217	5475.96	1217	12930.7	1217	10970.3	1217	5935.99	1217	8777.79
1218	5338.92	1218	3029.99	1218	7991.97	1218	5381.49	1218	13003.9	1218	11242	1218	6389.93	1218	9150.38
1219	6993.6	1219	3941.02	1219	8178.59	1219	4948.84	1219	12095.1	1219	10939.7	1219	5565.01	1219	7835.74
1220	8237.63	1220	5633.06	1220	6958.52	1220	4251.79	1220	12236.2	1220	9089.28	1220	5255.28	1220	6501.69
1221	6548.47	1221	3863.85	1221	5664.83	1221	3373.02	1221	12639.8	1221	10563	1221	6384.34	1221	5824.29
1222	7593.54	1222	4626.95	1222	4216.49	1222	2306.43	1222	10466.9	1222	9580.84	1222	7916.67	1222	6436.95
1223	8245.67	1223	4689.26	1223	3317.92	1223	1650.11	1223	9494.29	1223	7074.74	1223	8517.12	1223	6056.6
1224	8205.16	1224	5152.49	1224	2714.85	1224	1232.46	1224	8856.79	1224	6712.28	1224	9916.29	1224	5807.45
1225	8092.51	1225	5647.31	1225	2548.18	1225	950.486	1225	7309.31	1225	5646.83	1225	9628.05	1225	5943.34
1226	7182.69	1226	5409.03	1226	3712.44	1226	1873.78	1226	6809.51	1226	5680.51	1226	11700.8	1226	7895.98
1227	6145.95	1227	5317.49	1227	3097.34	1227	1705.86	1227	6259.33	1227	5288.14	1227	12026.6	1227	10597.9
1228	5628.74	1228	4593.92	1228	2855.25	1228	1609	1228	7248.22	1228	5683.95	1228	10286.5	1228	6806.59
1229	4941.79	1229	3419.8	1229	4582.24	1229	2927.01	1229	6850.77	1229	5358.79	1229	6760.56	1229	5253.26
1230	4907.63	1230	3273.89	1230	5566.91	1230	4590.6	1230	5190.31	1230	3913.79	1230	5004.92	1230	2906.55
1231	5249.59	1231	3756.4	1231	5720.85	1231	4991.93	1231	5011.78	1231	4450.86	1231	4125.27	1231	2773.05
1232	6053.87	1232	4360.76	1232	5782.17	1232	5327.1	1232	5729.32	1232	5386.1	1232	4303.65	1232	2233.04
1233	7129	1233	4976.34	1233	6425.76	1233	5467.28	1233	5127.53	1233	4797.93	1233	5110.86	1233	2850.23
1234	8717.26	1234	6218.69	1234	6201.14	1234	4916.1	1234	5237.17	1234	4944.44	1234	6565.38	1234	3442.64
1235	8842.41	1235	6656.26	1235	5785.12	1235	4361.53	1235	5762.36	1235	5653.17	1235	8177.57	1235	4743.74
1236	9282.65	1236	7897.9	1236	5296.74	1236	4611.79	1236	5791.64	1236	6265.12	1236	8751.3	1236	6130.15
1237	10412.9	1237	8904.47	1237	4858.33	1237	4354.24	1237	6389.61	1237	7209.25	1237	7096.52	1237	6757.75
1238	10404.2	1238	9001.56	1238	4951.83	1238	4853.25	1238	5896.4	1238	7579.37	1238	5721.58	1238	5497.74
1239	11854.1	1239	10232.8	1239	4892.78	1239	4441.95	1239	6016.5	1239	7366.98	1239	4765.39	1239	4731.3
1240	13444.9	1240	11159.7	1240	5212.48	1240	4304.47	1240	6633.96	1240	6742.15	1240	4056.03	1240	4229.85
1241	14163.2	1241	11946.8	1241	6402.7	1241	5324.45	1241	6814.38	1241	6242.16	1241	3286.7	1241	4161.15
1242	15102.2	1242	12135.4	1242	7205.65	1242	5620.36	1242	6409.95	1242	6436.19	1242	2756.45	1242	4614.06
1243	16363.1	1243	12878.3	1243	7378.11	1243	5603.31	1243	6706.35	1243	6813.56	1243	3051.55	1243	4858.97
1244	16353.6	1244	12234.3	1244	8288.9	1244	5804.44	1244	6587.31	1244	7167.5	1244	3133.94	1244	4210.9
1245	15039.3	1245	12588.2	1245	6109.4	1245	4481.35	1245	6071.63	1245	7622.07	1245	2789.49	1245	2515.62
1246	16623.9	1246	13128.1	1246	4798.56	1246	2808.73	1246	6967.4	1246	8531.43	1246	2890.76	1246	2632.81
1247	15261.2	1247	12695.7	1247	3929.84	1247	2446.26	1247	7177.55	1247	8301	1247	1636.75	1247	1687.33
1248	16291.8	1248	13004.5	1248	3941.74	1248	1846.91	1248	8995.84	1248	9147.49	1248	1639.25	1248	2121.43
1249	15951.7	1249	12635.2	1249	5292.37	1249	2798.32	1249	9649.61	1249	9237.08	1249	1677.49	1249	2494.51
1250	15278.6	1250	11177.1	1250	7143.26	1250	4171.34	1250	10053.8	1250	9311.94	1250	2286.35	1250	2492.64
1251	14403.5	1251	10885.7	1251	8476.43	1251	5981.49	1251	10544.5	1251	9873.1	1251	2835.76	1251	2909.64
1252	13205.7	1252	9875.78	1252	11326.1	1252	9014.09	1252	9600.55	1252	9632.66	1252	3558.37	1252	3120.59
1253	12936.2	1253	9262.28	1253	12004.3	1253	9440.47	1253	8549.6	1253	9542.51	1253	3979	1253	2635.97
1254	11261	1254	7936.69	1254	13355.7	1254	10735.4	1254	9050.09	1254	9253.37	1254	3599.8	1254	1600.12
1255	12589	1255	10045.2	1255	14917.1	1255	13052.1	1255	7613.68	1255	9335.02	1255	4087.05	1255	2049.22
1256	12585.7	1256	9689.1	1256	12873.8	1256	10939.7	1256	7532.98	1256	10569.4	1256	4104.02	1256	2085.51
1257	13926.7	1257	12162.9	1257	11095.7	1257	8872.76	1257	7113.48	1257	7589.15	1257	3596.8	1257	1865.02
1258	14741.2	1258	13615.7	1258	9896.6	1258	7400.06	1258	8020.63	1258	8949.23	1258	2647.68	1258	1515.35
1259	12504.9	1259	11498.9	1259	7924.72	1259	5539.78	1259	7929.63	1259	10122.9	1259	3823.08	1259	2610.65
1260	11498.6	1260	10106.7	1260	6174.99	1260	3587.3	1260	8186.66	1260	11038.4	1260	5589.74	1260	3816.06
1261	10964	1261	8150.46	1261	4878.87	1261	2387.19	1261	8351.25	1261	11202	1261	6947.37	1261	4596.45
1262	10351.6	1262	8012.86	1262	4370.77	1262	2137.21	1262	9123.47	1262	11480.5	1262	6907.96	1262	4550.97
1263	10140.7	1263	6219.88	1263	4492.98	1263	2382.37	1263	8907	1263	11558	1263	8196.7	1263	4277.82
1264	10751.7	1264	7015.31	1264	4340.48	1264	2745.59	1264	8193.48	1264	10968.5	1264	5561.52	1264	2973.22
1265	11000.4	1265	6774.96	1265	4495.72	1265	2799.73	1265	7161.27	1265	10351	1265	5662.29	1265	3438.37
1266	10851.5	1266	7088.09	1266	6748.82	1266	4833.82	1266	5955.66	1266	8807.81	1266	7375.15	1266	4499.55
1267	9534.41	1267	6460.61	1267	9543.64	1267	7931.66	1267	5559.39	1267	8252.02	1267	8511.55	1267	7860.44
1268	7763.38	1268	4776.48	1268	8512.38	1268	7651.19	1268	5420.33	1268	7096.62	1268	7431.14	1268	8300.61
1269	6708.62	1269	4395.59	1269	9100.74	1269	7456.06	1269	5201.93	1269	7087.91	1269	5235.81	1269	6505.27
1270	6093.58	1270	3845.26	1270	9469.29	1270	7588.17	1270	4944.99	1270	7588.03	1270	5413.45	1270	6117.81
1271	5155.36	1271	3899.47	1271	8966.18	1271	7616.84	1271	4903.04	1271	6354.3	1271	3349.89	1271	5490.47
1272	4732.53	1272	3535.05	1272	9216.38	1272	7747.92	1272	4976.57	1272	6448.43	1272	1693.65	1272	2889.47
1273	3773.39	1273	3446.46	1273	9399.75	1273	8885.68	1273	8832.94	1273	9653.67	1273	1189.13	1273	1758.28
1274	3461.62	1274	3782.65	1274	9710.32	1274	9871.85	1274	7124.52	1274	8152.33	1274	742.469	1274	900.415
1275	3900.68	1275	3765.56	1275	9681.82	1275	9144.31	1275	14072	1275	14052.5	1275	2692.74	1275	1279.3
1276	4393.43	1276	3529.44	1276	9422.87	1276	8650.81	1276	11000.1	1276	10431.5	1276	1823.5	1276	1196.05
1277	4941.29	1277	3406.59	1277	11041.3	1277	10340.8	1277	15454.4	1277	13276.4	1277	3333.32	1277	2625.69
1278	5926.59	1278	3966.88	1278	12749.8	1278	12022.9	1278	17419.1	1278	14579.8	1278	4228.02	1278	3875.79
1279	6364.65	1279	4838.17	1279	12944.2	1279	10769.4	1279	18580.8	1279	13744.6	1279	3407.73	1279	3055.54
1280	6038.79	1280	5458.15	1280	11673.8	1280	9398.72	1280	17314.6	1280	13193.3	1280	3598.94	1280	2563.37
1281	3747.6	1281	3802.56	1281	11968.5	1281	9515.1	1281	18104.1	1281	12206.2	1281	3000.8	1281	2829.46
1282	3705.52	1282	3892.9	1282	12547.2	1282	10419.2	1282	15588.2	1282	10673.8	1282	2786.1	1282	4137.43
1283	3655.17	1283	3070.98	1283	13451.4	1283	10345	1283	16524.9	1283	11828.3	1283	2884.95	1283	3729.16
1284	4695.78	1284	3413.15	1284	13327.4	1284	11082.5	1284	15485	1284	12567.7	1284	2673.69	1284	2751.72
1285	6277.93	1285	4335.43	1285	14105	1285	12324	1285	16841.2	1285	12442.5	1285	3255.07	1285	3470.57
1286	7128.69	1286	5044.98	1286	15132.8	1286	13173.8	1286	15068.2	1286	13709.2	1286	3043.39	1286	1863.55
1287	7717.25	1287	5733.32	1287	15537.6	1287	13685.8	1287	13058.8	1287	12175.3	1287	3446.48	1287	3428.54
1288	4966.68	1288	3150.6	1288	16415.2	1288	15108.8	1288	13553	1288	12430.5	1288	3202.01	1288	4287.96
1289	6679.57	1289	4256.36	1289	17125.7	1289	16342.5	1289	12135.6	1289	11839.8	1289	3218.26	1289	3553.2
1290	7560.56	1290	4628.89	1290	17875.7	1290	17088	1290	12843.3	1290	11864.3	1290	3444.65	1290	4480.53
1291	8642.2	1291	5064.53	1291	16688	1291	16552.6	1291	12415.2	1291	10461.9	1291	4272.53	1291	4383.28
1292	8646.65	1292	5734.93	1292	14509.9	1292	14798.3	1292	12427	1292	11604.3	1292	3700.55	1292	4231.79
1293	8034.76	1293	5033.76	1293	11450.8	1293	11372.4	1293	14164	1293	13523.1	1293	4026.33	1293	4586.64
1294	8862.76	1294	5737.48	1294	9098.54	1294	8881.24	1294	12025.4	1294	10860	1294	5250.86	1294	6423.34
1295	10560.4	1295	8108.65	1295	10994.7	1295	10817.5	1295	13372.2	1295	10899.3	1295	6141.29	1295	8428.13
1296	10421.4	1296	8419.59	1296	10658.3	1296	10130.6	1296	10587.5	1296	7972.66	1296	4240.69	1296	5091.11
1297	10391.9	1297	8197.66	1297	9386.17	1297	8170.58	1297	10822.1	1297	7015.85	1297	3252.28	1297	4089.85
1298	10093	1298	7512.26	1298	8173.16	1298	6066.92	1298	11839.8	1298	7935.9	1298	2619.17	1298	3221.19
1299	10262.5	1299	6391.97	1299	6771.66	1299	4567.04	1299	13579.9	1299	10082.5	1299	3168.23	1299	3029.25
1300	9815.28	1300	6342.58	1300	5608.15	1300	3832.09	1300	13980.3	1300	8936.54	1300	5182.34	1300	4526.82
1301	10485.4	1301	7275.02	1301	5204.14	1301	4091.67	1301	13794.7	1301	8781.23	1301	9604.32	1301	8913.2
1302	11433.3	1302	8210.1	1302	6558.66	1302	5739.58	1302	11281.9	1302	6902.4	1302	12414.8	1302	12689.6
1303	10769.7	1303	8186.32	1303	8224.12	1303	8202.5	1303	10504.3	1303	6224.76	1303	11880.8	1303	12619.2
1304	11101.3	1304	8574.52	1304	9639.25	1304	10814.7	1304	6015.03	1304	4764.63	1304	8422.67	1304	7597.91
1305	10706.3	1305	8391.94	1305	10830.4	1305	13289.8	1305	6192.18	1305	4225.81	1305	8827.84	1305	6026.43
1306	11675.7	1306	9982.96	1306	12408	1306	15810.7	1306	5205.22	1306	4474.81	1306	8704.44	1306	7044.65
1307	10569.3	1307	8434.81	1307	14960.1	1307	18397.6	1307	5071.72	1307	5769.68	1307	10461	1307	7887.26
1308	9737.85	1308	7992.04	1308	17560.4	1308	19621.3	1308	5414.87	1308	6621.82	1308	11372	1308	9551.5
1309	8868.4	1309	7118.42	1309	20203.3	1309	19479.9	1309	7126.82	1309	8045.37	1309	12522.2	1309	10824
1310	8598.63	1310	7489.14	1310	19053.5	1310	18038.2	1310	9331.67	1310	10088	1310	11902.8	1310	10390.4
1311	9038.62	1311	8097.69	1311	19547.2	1311	17841.3	1311	10328.4	1311	10043.1	1311	9614.39	1311	7643.07
1312	9769.45	1312	8352.5	1312	23190.5	1312	18482.9	1312	12460.4	1312	12519.5	1312	7316.4	1312	4824.82
1313	10055.1	1313	8886.52	1313	24056.5	1313	17761.5	1313	13233.5	1313	11201.8	1313	8284.23	1313	5648.77
1314	10162.5	1314	8998.4	1314	24227.5	1314	18650.1	1314	13163	1314	10483.5	1314	9243.42	1314	7495.94
1315	11315.4	1315	9891.27	1315	21847.4	1315	13934.4	1315	13800.2	1315	10819.3	1315	7131.55	1315	7584.32
1316	11726.3	1316	10103.3	1316	19969.8	1316	11658.6	1316	13481	1316	11801.4	1316	7012.62	1316	8111.46
1317	12705.6	1317	10654.1	1317	23359.7	1317	16719.9	1317	14311.8	1317	12110.2	1317	5978.51	1317	6683.41
1318	14352.2	1318	11793.3	1318	18559.4	1318	13132.7	1318	14914.8	1318	12058.9	1318	6406.2	1318	8322.91
1319	14331.7	1319	11670.2	1319	16839	1319	11227.2	1319	13299.5	1319	11385.3	1319	6144.04	1319	6963.99
1320	15064.2	1320	12825.6	1320	16950.8	1320	13366.3	1320	13974.5	1320	11914.7	1320	5177.31	1320	5865.12
1321	14403.5	1321	11963.2	1321	17674.9	1321	13624.3	1321	12311.6	1321	10938.5	1321	4986.8	1321	5926.22
1322	16154.4	1322	12085.6	1322	19652	1322	17017.7	1322	13391.6	1322	11668.1	1322	5159.52	1322	5531.19
1323	14677.1	1323	9933.71	1323	22759.2	1323	16816.6	1323	14831.8	1323	13050.2	1323	4935.09	1323	4886.25
1324	13691.3	1324	9336.54	1324	23782.9	1324	14623.2	1324	12778.2	1324	12113.7	1324	5140.54	1324	4807.63
1325	10539.5	1325	7194.82	1325	26513.4	1325	19047.1	1325	15138.1	1325	13683	1325	4248.94	1325	4748.67
1326	9402.32	1326	7014.5	1326	25107.8	1326	16531.8	1326	11965	1326	13011.3	1326	4176.03	1326	4449.52
1327	9269.62	1327	8035.68	1327	24171.9	1327	17247.2	1327	13210	1327	14644.6	1327	3107.37	1327	3700.17
1328	8717.93	1328	7614.17	1328	23433	1328	18054.6	1328	15438.8	1328	16376	1328	3188.15	1328	4757.77
1329	8069.52	1329	6876.38	1329	20170.5	1329	14225.9	1329	15748.8	1329	15411.5	1329	3296.15	1329	4903.04
1330	7200.33	1330	6434.97	1330	16903.4	1330	10522.3	1330	16423	1330	15389.9	1330	6773.38	1330	8019.6
1331	7383.65	1331	6276.29	1331	13271.3	1331	7441.66	1331	18905.1	1331	16375.3	1331	5377.86	1331	6539.03
1332	8033.14	1332	6528.45	1332	10606.9	1332	6173.83	1332	17280.6	1332	13772.8	1332	7424.06	1332	8307.14
1333	6766.39	1333	5683.23	1333	9489.87	1333	6389.46	1333	11149.8	1333	12878.2	1333	8493.42	1333	5032.1
1334	6925.19	1334	6108.32	1334	8673.81	1334	6874.69	1334	9805.96	1334	11373.4	1334	7958.86	1334	5562.28
1335	5987.92	1335	5373.21	1335	7271.35	1335	5838.48	1335	6450.35	1335	7225.61	1335	6939.68	1335	4856.97
1336	6951.16	1336	5377.59	1336	7370.19	1336	6426.12	1336	6961.34	1336	6944.43	1336	7155.36	1336	6118.82
1337	8250.1	1337	6212.66	1337	6077.27	1337	5290.48	1337	6680.14	1337	6476.19	1337	7539.67	1337	8461.24
1338	9066.9	1338	6498.24	1338	6426.84	1338	4696.14	1338	5743.47	1338	6034.62	1338	8371.25	1338	6550.06
1339	10252.1	1339	7179.74	1339	5423.78	1339	4474.38	1339	5562.78	1339	5212.65	1339	7812.1	1339	7437.87
1340	9756.27	1340	7007.86	1340	4781.05	1340	3852.53	1340	4210.79	1340	4417.68	1340	7055.18	1340	6918.47
1341	8637.07	1341	5994	1341	5210.25	1341	3943.14	1341	3617.92	1341	3524.3	1341	6598.25	1341	5584.65
1342	8394.87	1342	6044.6	1342	6764.38	1342	5082.7	1342	4168.91	1342	3378.11	1342	5540.91	1342	3958.33
1343	9586.61	1343	7091.17	1343	6507.17	1343	5085.07	1343	4011.51	1343	4264.89	1343	5750.88	1343	4441.7
1344	10589	1344	8046.83	1344	7395.01	1344	5992.23	1344	3857.56	1344	3142.53	1344	6014.97	1344	6770.89
1345	10345	1345	7838.56	1345	6171.98	1345	5328.4	1345	5089.94	1345	3014.86	1345	6020.53	1345	5778.43
1346	8672.95	1346	6099.21	1346	6807.3	1346	6430.46	1346	6212.27	1346	4292	1346	7106.82	1346	6538.68
1347	7663.66	1347	5779.87	1347	6014.73	1347	5407.55	1347	7641.99	1347	6015.75	1347	7616.29	1347	6981.91
1348	7684.99	1348	6149.14	1348	6781.58	1348	5910.98	1348	7015.44	1348	7055.66	1348	6089.9	1348	6074.61
1349	8704.77	1349	6912.28	1349	7238.33	1349	6581.78	1349	7124.85	1349	7305.96	1349	5234.28	1349	5584.66
1350	8964.1	1350	6823.59	1350	8380.93	1350	7761.26	1350	6213.8	1350	6130.29	1350	3807.87	1350	4369.97
1351	8521.95	1351	6754.81	1351	9786.37	1351	9178.61	1351	6675.41	1351	5570.42	1351	2818.51	1351	3908.7
1352	8688.23	1352	6354.24	1352	11410.7	1352	10822.3	1352	3200.12	1352	2769.1	1352	5017.51	1352	5370.66
1353	7828.04	1353	6576.25	1353	12524.1	1353	11010.5	1353	1816.45	1353	935.124	1353	4300.87	1353	5063.74
1354	9195.61	1354	7153.68	1354	12967.4	1354	10267.9	1354	1649.71	1354	1331.52	1354	3862.81	1354	4291.14
1355	8731.73	1355	6953.24	1355	13274.1	1355	9587.95	1355	647.866	1355	1015.47	1355	5071.34	1355	4251.37
1356	9349.01	1356	7780.37	1356	13306.1	1356	10669.6	1356	984.94	1356	702.145	1356	5615.46	1356	5327.07
1357	10501.9	1357	9468.66	1357	12856.9	1357	10719.1	1357	641.129	1357	378.003	1357	5819.86	1357	6515.89
1358	10792.1	1358	10466.1	1358	10358.4	1358	8130.5	1358	1580.35	1358	969.314	1358	7197.93	1358	7811.98
1359	10256.6	1359	8970.43	1359	11264	1359	9583.83	1359	1809.68	1359	1087.19	1359	11922.1	1359	10569
1360	9335.71	1360	7505.22	1360	10368.8	1360	9173.1	1360	3320.49	1360	2182.83	1360	14366.8	1360	13036.1
1361	8120.11	1361	5583.19	1361	9430.7	1361	7638.93	1361	4497.71	1361	2685.93	1361	12665.9	1361	11521.2
1362	7978.1	1362	5791.22	1362	10256.6	1362	8146.24	1362	6171.4	1362	4119.02	1362	10301.8	1362	10117.7
1363	9622.19	1363	7206.49	1363	10363	1363	8610.3	1363	6343.28	1363	5733.21	1363	8447.42	1363	9350.72
1364	10410.9	1364	7786.48	1364	10371.6	1364	8992.84	1364	7125.2	1364	5549.84	1364	7507.08	1364	8801.36
1365	9549.81	1365	7078.25	1365	8742.55	1365	7383.57	1365	7009.12	1365	6233.94	1365	8262.8	1365	9916.69
1366	7895.33	1366	4960.51	1366	9568.07	1366	6822.84	1366	7143.64	1366	6512.44	1366	8935.02	1366	8985.22
1367	6980.6	1367	4963.02	1367	9321.14	1367	6137.99	1367	8625.55	1367	6709.52	1367	9859.11	1367	9306.65
1368	7588.02	1368	6846.81	1368	9472.24	1368	6496.66	1368	6952.41	1368	6384.21	1368	12407.3	1368	12342.2
1369	8646.76	1369	6393.8	1369	10700	1369	6755.66	1369	7676.77	1369	5640.56	1369	14060	1369	12232.7
1370	8784.89	1370	6573.73	1370	10430	1370	6960.67	1370	9470.89	1370	6474.68	1370	15266.3	1370	13363.8
1371	8335.4	1371	5526.15	1371	10753.9	1371	7819.72	1371	9834.18	1371	7980.93	1371	15668	1371	13106.4
1372	7862.5	1372	5593.13	1372	9688.84	1372	8717.01	1372	9433.15	1372	7411.69	1372	13480.2	1372	11999.2
1373	7666.83	1373	6230.71	1373	9434.91	1373	8583.78	1373	8780.55	1373	5131.03	1373	11466.2	1373	11610.9
1374	7239.49	1374	6813.3	1374	9788.45	1374	9010.71	1374	5340.22	1374	4247.56	1374	9974.29	1374	10465.5
1375	7212.47	1375	7049.22	1375	9441.93	1375	8127.39	1375	5760.62	1375	5354.67	1375	8653.59	1375	9044.76
1376	7815.82	1376	7581.77	1376	9255.45	1376	8185.47	1376	6557.25	1376	6643.11	1376	7349.99	1376	7950.4
1377	9709.88	1377	8863.19	1377	8724.9	1377	7881.27	1377	7622.28	1377	7087.9	1377	7553.16	1377	8910.3
1378	11481.8	1378	9251.38	1378	8348.58	1378	7126.66	1378	8279.07	1378	7788.98	1378	9788.38	1378	11101.3
1379	12521.7	1379	9818.96	1379	8743.05	1379	6772.13	1379	8562.9	1379	7726.65	1379	10642.3	1379	11820.9
1380	12580.3	1380	9107.23	1380	7464.46	1380	6554.85	1380	8440.62	1380	7369.74	1380	10736.8	1380	11799.1
1381	11473.5	1381	8401.56	1381	6730.31	1381	5927.66	1381	7160.11	1381	6364.28	1381	9712.44	1381	10872.7
1382	10893.8	1382	7999.95	1382	6332.18	1382	5201.05	1382	5193.03	1382	5910.17	1382	9497.88	1382	10847.3
1383	10758.4	1383	8046.79	1383	6161.66	1383	4973.4	1383	3769.03	1383	4261.39	1383	7099.27	1383	7450.25
1384	10625.1	1384	7672.49	1384	6046.77	1384	4030.93	1384	3583.18	1384	4360.18	1384	6897.58	1384	5638.98
1385	10767.6	1385	7249.61	1385	5908.23	1385	4424.5	1385	2896.69	1385	4150.3	1385	7250.23	1385	6037.03
1386	10659.8	1386	7576.16	1386	6324.51	1386	5590.85	1386	2292.26	1386	4017.1	1386	7858.39	1386	5376.33
1387	9830.11	1387	7711.2	1387	6513.81	1387	5468.85	1387	2929.61	1387	4511.72	1387	9488.81	1387	6664.99
1388	9986.04	1388	8269.3	1388	7673.33	1388	6875.44	1388	4941.51	1388	4964.68	1388	9460.23	1388	5601.66
1389	11071.6	1389	9403.58	1389	8350.48	1389	7649.46	1389	7196.67	1389	5943.48	1389	8808.6	1389	4114.9
1390	12579.8	1390	10072.2	1390	8760.75	1390	8563.91	1390	7898.4	1390	6788.94	1390	6719.97	1390	2039.79
1391	13501.1	1391	11191.3	1391	8631.89	1391	9057.94	1391	8576.83	1391	6273.19	1391	2567.43	1391	708.104
1392	13439.8	1392	10636.4	1392	7956.13	1392	8127.41	1392	9364.06	1392	6427.08	1392	1306.51	1392	629.603
1393	13688.3	1393	11126.2	1393	8601.57	1393	8674.61	1393	7349.96	1393	4830.08	1393	1147.89	1393	1552.84
1394	14401.1	1394	11925.4	1394	8718.76	1394	8388.33	1394	9666	1394	6134.71	1394	2965.11	1394	4278.56
1395	14959.4	1395	12686.2	1395	7693.47	1395	7176	1395	8711.45	1395	5230.82	1395	5231.52	1395	6243.39
1396	15851.3	1396	13606.9	1396	8020.48	1396	7301.9	1396	7789.67	1396	5640.7	1396	6920.23	1396	5857.8
1397	17021.5	1397	14305.1	1397	6890.44	1397	5921.82	1397	7405.52	1397	6444.78	1397	6438.92	1397	7059.02
1398	17931	1398	14163.7	1398	6673.77	1398	5454.09	1398	7766.08	1398	7402.73	1398	5304.49	1398	7454.42
1399	19899.1	1399	16425.1	1399	7141.99	1399	5488.59	1399	9458.46	1399	8884.32	1399	5411.89	1399	8541.04
1400	20613.4	1400	18243.9	1400	5783.58	1400	4380.53	1400	10273.2	1400	8908.32	1400	5751.21	1400	8173.45
1401	20106.7	1401	16970.1	1401	4201.08	1401	3207.5	1401	11178.1	1401	9487.73	1401	6185.26	1401	8346.79
1402	19705.4	1402	16132	1402	4270.93	1402	3777.4	1402	10989.4	1402	9004.71	1402	8657.56	1402	10269.5
1403	22570.4	1403	19560.1	1403	3450	1403	3640.32	1403	10282.7	1403	7660.85	1403	9966.65	1403	10910.2
1404	21552.6	1404	16158.6	1404	2703.89	1404	2619.01	1404	10015	1404	7816.77	1404	11933.7	1404	12179.9
1405	21671.9	1405	15846.9	1405	2277.79	1405	2470.06	1405	9362.25	1405	8198.1	1405	12313.2	1405	10219.5
1406	22109.6	1406	16907.7	1406	2334.75	1406	2603.05	1406	8747.74	1406	8390.02	1406	12507.6	1406	9245.4
1407	22867.1	1407	16923	1407	2299.8	1407	2577.83	1407	7363.94	1407	7095.78	1407	11024.5	1407	8955.68
1408	23676.6	1408	18015.6	1408	3662.17	1408	4152.07	1408	7355.89	1408	8106.05	1408	9793.29	1408	9002.15
1409	23917	1409	18531.4	1409	2282.55	1409	2647.18	1409	7346.69	1409	7889.69	1409	8454.38	1409	8819.26
1410	23321.7	1410	17878.7	1410	3544.25	1410	3906.13	1410	7265.69	1410	7759.48	1410	8119.19	1410	9018.74
1411	23225.3	1411	17449.4	1411	3040.03	1411	2676.87	1411	6952.6	1411	7301.7	1411	9901.37	1411	13905.5
1412	23477.2	1412	17970.1	1412	5161.94	1412	5229.5	1412	6124.3	1412	6427.12	1412	10075.7	1412	15350
1413	23307.9	1413	18409.5	1413	4383.73	1413	4433.48	1413	6227.34	1413	6595.14	1413	11979.5	1413	18458.4
1414	22761	1414	18397.3	1414	5767.48	1414	5746.73	1414	6572.11	1414	7356.22	1414	13731.1	1414	21622.5
1415	21629.7	1415	18030.8	1415	6577.97	1415	6666.88	1415	7856.19	1415	7690.18	1415	15289.6	1415	24497.4
1416	21073	1416	17354.4	1416	6416.85	1416	6023.4	1416	9730.65	1416	7820.01	1416	16671.1	1416	23492.3
1417	21189	1417	17502.8	1417	6691.22	1417	5412.91	1417	10140.6	1417	7941.35	1417	16817.5	1417	19880.9
1418	21405.5	1418	17772.9	1418	8171.69	1418	6096.73	1418	9275.7	1418	8059.96	1418	18002.2	1418	22082.2
1419	22043.5	1419	18443	1419	7233.45	1419	5917.61	1419	11953.3	1419	9275.26	1419	16622.8	1419	22897.7
1420	23098.3	1420	19618.4	1420	7494.37	1420	6435.89	1420	12909.8	1420	9168.95	1420	18922.7	1420	25157.2
1421	24164.8	1421	20392.9	1421	6883.16	1421	6553.64	1421	13264.6	1421	9457.04	1421	18410.4	1421	25734.1
1422	24898.3	1422	20697.9	1422	6947.99	1422	6853.71	1422	13471	1422	8447.19	1422	17879	1422	21948.1
1423	25150.4	1423	20503.8	1423	7524.63	1423	6260.48	1423	14758	1423	9283.2	1423	15976.4	1423	19250.5
1424	25512.4	1424	19730.5	1424	7664.56	1424	6993.78	1424	13050.5	1424	8331.12	1424	14580.6	1424	16394.1
1425	25854.3	1425	19234.6	1425	7631.68	1425	6770.52	1425	10617.4	1425	6904.24	1425	12683.4	1425	16268.1
1426	25423.5	1426	19067.1	1426	7319.12	1426	6043.3	1426	12840.1	1426	8312.54	1426	11130.2	1426	15474
1427	24840.7	1427	18704	1427	6722.62	1427	5507.36	1427	10684.6	1427	6317.99	1427	11017.6	1427	15598.6
1428	24469.3	1428	17991.3	1428	6866.3	1428	5874	1428	11333.2	1428	6512.14	1428	9797.99	1428	13321.3
1429	23786.6	1429	18322.2	1429	7203.2	1429	6022.57	1429	11767.9	1429	5765.11	1429	13761	1429	15866.6
1430	23665.2	1430	18996.9	1430	7819.86	1430	6853.35	1430	12884.7	1430	7287.7	1430	10379.5	1430	13719.8
1431	23135.8	1431	19404.4	1431	8129.25	1431	6680.48	1431	12451.1	1431	7286.41	1431	8487.45	1431	12016.5
1432	22801	1432	19567.3	1432	7904.68	1432	7001.04	1432	12664.1	1432	7476.64	1432	9242.85	1432	13902.3
1433	22483.1	1433	19332	1433	7544.79	1433	6004.42	1433	12509.1	1433	9129.57	1433	8512.25	1433	12421
1434	21734.9	1434	18018	1434	7787.33	1434	6964.85	1434	11639.5	1434	8920.26	1434	8131.17	1434	11744
1435	21801.1	1435	17432	1435	8110.53	1435	6711.04	1435	12083.2	1435	9492.88	1435	5969.29	1435	9345.5
1436	21703.3	1436	17515.5	1436	7080.66	1436	5263.18	1436	13127.9	1436	10806.8	1436	4237.03	1436	6800.89
1437	21236.3	1437	16928.5	1437	8044.8	1437	7151.95	1437	13218.5	1437	12099.6	1437	6009.35	1437	7054.19
1438	20298.3	1438	16555.1	1438	7048.5	1438	6976.34	1438	12940.4	1438	12063.3	1438	6138.4	1438	6489.94
1439	20698.6	1439	16323.2	1439	6882.96	1439	6836.91	1439	11034	1439	9857.57	1439	8865.33	1439	5731.97
1440	21872.9	1440	16740.2	1440	6654.34	1440	5828.67	1440	10756.5	1440	8961.97	1440	11320.6	1440	6076.96
1441	22543.1	1441	17287.8	1441	7157.82	1441	6510.56	1441	11333.6	1441	8546.3	1441	12110.2	1441	9241.73
1442	22440.8	1442	17975.3	1442	6933.93	1442	6132.91	1442	10650.3	1442	8058.93	1442	8934.44	1442	8747.34
1443	21322.5	1443	16587.8	1443	6208.78	1443	5451.34	1443	11678.4	1443	8451.08	1443	11542.8	1443	10311.8
1444	20504.8	1444	15921.1	1444	6097.26	1444	6118.94	1444	11899.2	1444	8137.22	1444	12134.1	1444	10559.5
1445	21874.4	1445	17373	1445	6733.95	1445	7374.19	1445	12897.9	1445	8589.81	1445	7966.65	1445	9354.41
1446	19556.5	1446	15148.1	1446	6468.4	1446	7036.57	1446	12640.4	1446	8614.56	1446	7867.66	1446	8131.01
1447	18892.4	1447	14836.9	1447	5761.75	1447	5718.77	1447	15824.4	1447	10393.4	1447	8291.64	1447	7655.34
1448	18741	1448	14837.8	1448	5719.26	1448	5062.26	1448	16807.3	1448	11796.5	1448	9562.85	1448	8484.34
1449	16889.6	1449	13789.6	1449	5816.64	1449	4529.27	1449	17917.6	1449	12574.4	1449	10455.8	1449	10426.9
1450	15735.9	1450	12693.1	1450	6377.26	1450	5455.94	1450	19814.1	1450	14711.2	1450	10814.7	1450	10947
1451	16682.7	1451	13344.3	1451	7104.32	1451	6735.52	1451	20224.4	1451	13894.6	1451	10549	1451	9979.6
1452	17248.4	1452	14907.7	1452	6789.75	1452	7762.08	1452	18714.5	1452	12847	1452	9928.58	1452	8814.33
1453	17879.7	1453	15862.5	1453	5160.15	1453	6713.12	1453	13177.1	1453	7490.53	1453	9483.22	1453	8938.78
1454	19347.1	1454	15520.2	1454	3759.34	1454	4559.77	1454	15820.9	1454	10071.6	1454	8468.35	1454	7160.51
1455	20693.6	1455	15544.5	1455	3617.24	1455	3933.53	1455	11086.8	1455	6969.02	1455	10008.9	1455	9571.83
1456	22496.7	1456	16449.3	1456	3290.56	1456	3187.97	1456	12718.4	1456	8029.33	1456	10115	1456	9153
1457	22032	1457	17220.1	1457	2930.58	1457	2924.15	1457	13961.9	1457	7785.55	1457	14004.1	1457	11096
1458	21871.8	1458	16725	1458	2521.53	1458	2869.56	1458	10707.7	1458	6431.55	1458	17455.5	1458	14354.1
1459	21168.1	1459	16576.2	1459	2304.44	1459	2572.99	1459	10142.8	1459	6086.87	1459	17136.4	1459	17886.9
1460	21827.5	1460	15335.2	1460	2600.92	1460	2489.52	1460	12856.5	1460	7006.5	1460	13261.6	1460	15787.9
1461	22456.4	1461	14060.1	1461	3385.68	1461	2555.16	1461	14604.7	1461	10847.9	1461	11297.5	1461	12740.1
1462	22405.3	1462	14580.5	1462	3401.42	1462	2602.1	1462	15660.4	1462	13108.1	1462	12694.8	1462	12980.5
1463	22074	1463	15109.2	1463	3173.95	1463	2187.67	1463	15577.8	1463	14736.7	1463	11737.9	1463	11649.6
1464	20089.6	1464	15485.5	1464	2529.18	1464	2116.68	1464	14746.7	1464	13711.5	1464	13381.7	1464	13364.1
1465	18435.6	1465	15168.9	1465	2147.9	1465	1977.41	1465	13628.7	1465	12674.2	1465	13867	1465	15301.7
1466	16981.2	1466	14926.2	1466	1918.8	1466	1956.51	1466	13516.6	1466	12506.8	1466	14438.8	1466	14488.6
1467	15040.4	1467	12981.9	1467	1928.92	1467	1466.08	1467	12257.4	1467	11972.4	1467	15507.5	1467	13600.7
1468	13892.7	1468	12028.4	1468	2611.27	1468	1507.76	1468	12481.7	1468	12859.2	1468	16823.6	1468	13685.5
1469	12842.9	1469	11348	1469	3813.95	1469	1855.1	1469	13024.7	1469	13268.2	1469	17155.2	1469	14017.8
1470	12907.9	1470	11007.6	1470	4833.68	1470	2420.17	1470	11074	1470	11761.6	1470	18138.6	1470	16033
1471	13440.9	1471	11608.7	1471	5205.38	1471	2742.09	1471	10197.5	1471	9186.52	1471	19144	1471	16282
1472	12494.7	1472	11584	1472	5450.53	1472	3166.03	1472	9341.57	1472	9000.39	1472	20475.1	1472	16876.9
1473	11523	1473	10589	1473	6102.35	1473	4024.04	1473	8371.7	1473	8974.48	1473	21189.6	1473	18835.8
1474	10704.4	1474	9442.26	1474	5425.48	1474	3624.25	1474	7729.91	1474	8457.88	1474	19364.9	1474	19895.7
1475	10603.1	1475	9219.33	1475	7269.01	1475	5519.12	1475	6719.76	1475	7443.51	1475	16122.8	1475	18867.1
1476	10925.9	1476	9427.78	1476	6070.6	1476	4756.83	1476	7319.13	1476	6049.22	1476	13888.9	1476	14961.4
1477	11006.6	1477	8967.05	1477	7274.45	1477	5350.05	1477	7272.63	1477	5677.7	1477	13263.5	1477	14760.9
1478	11260.6	1478	9372.55	1478	8408.97	1478	5628.61	1478	7493.02	1478	5612.53	1478	14720.6	1478	16964.1
1479	12081.2	1479	10434.7	1479	8401.67	1479	5432.85	1479	8963.43	1479	5467.37	1479	13433.4	1479	15414.6
1480	13748.6	1480	11507.4	1480	7579.42	1480	5045	1480	9394.66	1480	6481.5	1480	11361.6	1480	13887.2
1481	16326.4	1481	13003.5	1481	6231.41	1481	4209.49	1481	9829.36	1481	6507.14	1481	10809.8	1481	8841.05
1482	18569.7	1482	14537.3	1482	7137.72	1482	5823.75	1482	9806.91	1482	7223.11	1482	11292.6	1482	10747.7
1483	19066.7	1483	15441.9	1483	9142.84	1483	8293.76	1483	10410.4	1483	7776.83	1483	12605.8	1483	9912.32
1484	17690.2	1484	14644.5	1484	9462.7	1484	7454.71	1484	10689	1484	8956.53	1484	14185.7	1484	11719.4
1485	15823.9	1485	12665.8	1485	9820.9	1485	6665.22	1485	11505.1	1485	9511.97	1485	15010.3	1485	14251.9
1486	14002.6	1486	11062.6	1486	10034.4	1486	6042.89	1486	12024	1486	9831.26	1486	15152.2	1486	12556.3
1487	12719.5	1487	9815.25	1487	11366	1487	6856.55	1487	13467.7	1487	10563.8	1487	15775.6	1487	11572.8
1488	11541.1	1488	7712.32	1488	11408.8	1488	7979.72	1488	13074	1488	9567.16	1488	16828.7	1488	11615.3
1489	10812	1489	7594.57	1489	10442	1489	7519.1	1489	15704.2	1489	12754.3	1489	18796.3	1489	12044.2
1490	10254.9	1490	7558.07	1490	8479.35	1490	6823.38	1490	16601.2	1490	15484.6	1490	19741.6	1490	13901.8
1491	10361.4	1491	7312.01	1491	9094.18	1491	7535.38	1491	16724.1	1491	16363.3	1491	22475.1	1491	18142.4
1492	10520.9	1492	7337.15	1492	10019.1	1492	8507.25	1492	17040.5	1492	16966.5	1492	24166.4	1492	21703.1
1493	10113.5	1493	7004.34	1493	8853.44	1493	7724.4	1493	12642.2	1493	13715.5	1493	26618.5	1493	25626.9
1494	10274.1	1494	7962.6	1494	6889.14	1494	5272.51	1494	9604.18	1494	10456.7	1494	27862.8	1494	25729.4
1495	10523.7	1495	8603.39	1495	6259.55	1495	4695.41	1495	9706.57	1495	9164.28	1495	27321	1495	24918.7
1496	10140.8	1496	7789.9	1496	6078.44	1496	4761.13	1496	8297.72	1496	8124.08	1496	27751.3	1496	22069
1497	10462.1	1497	8714.61	1497	6092.86	1497	4893.3	1497	7102.16	1497	5589.58	1497	25264.7	1497	21516.5
1498	10035.8	1498	8101.16	1498	5628.73	1498	4858.37	1498	6883.78	1498	6409.21	1498	22750.7	1498	21981.3
1499	9267.73	1499	7920.15	1499	6737.77	1499	5572.54	1499	8850.86	1499	7990.8	1499	23606.6	1499	20070.6
1500	8607.88	1500	7658.8	1500	6434.29	1500	5659.18	1500	7860.35	1500	6238.65	1500	23748.5	1500	20638.4
1501	8632.12	1501	7718.65	1501	6732.14	1501	5764.2	1501	10509.3	1501	8167.09	1501	25273.6	1501	21171.5
1502	8817.2	1502	7466.65	1502	8214.88	1502	5820.28	1502	12173.5	1502	9900.06	1502	23125.5	1502	18789.3
1503	10203.1	1503	7337.82	1503	8205.37	1503	5691.07	1503	13530.3	1503	10547.2	1503	21156.9	1503	20394.8
1504	11296.9	1504	9153.71	1504	9195.1	1504	5470.66	1504	13605.2	1504	11930.8	1504	19536.5	1504	19453.3
1505	12905.2	1505	10402.5	1505	9198.28	1505	5326.6	1505	14158.2	1505	12330	1505	22144.9	1505	22579
1506	12392.8	1506	9537.91	1506	9524.77	1506	5503.27	1506	14324.8	1506	12369.8	1506	21129.2	1506	20568.9
1507	11265.1	1507	8679.56	1507	10252.7	1507	5635.77	1507	15113.5	1507	12352.7	1507	23017.4	1507	23105.5
1508	10458.6	1508	7907.42	1508	10506.3	1508	6309.35	1508	15946.5	1508	12027.8	1508	21162.2	1508	22392.2
1509	9162.51	1509	6818.01	1509	9801.36	1509	6456.05	1509	18185.8	1509	14038.1	1509	17060.5	1509	20592.2
1510	9364.04	1510	6026.44	1510	8788.89	1510	6325.86	1510	18197.9	1510	15147.3	1510	17036.5	1510	19099
1511	10474.4	1511	6500.65	1511	8986.06	1511	6354.12	1511	17075.7	1511	15077.7	1511	13515.4	1511	16681.6
1512	9720.32	1512	6339.45	1512	9048.25	1512	6302.3	1512	15624.4	1512	14744.1	1512	14182.1	1512	16404.5
1513	9392.44	1513	6041.31	1513	9385.42	1513	7349.65	1513	15920	1513	13832.7	1513	13602.1	1513	14422.5
1514	9946.54	1514	5750.9	1514	9391.34	1514	7813.81	1514	14670.8	1514	13011.5	1514	13215.4	1514	13363.8
1515	11802.4	1515	8178.78	1515	10603.1	1515	8695.86	1515	13622.3	1515	13239.1	1515	13528	1515	13576
1516	10456.8	1516	8008.7	1516	10286.9	1516	9088.5	1516	13823.8	1516	13385.9	1516	13207.2	1516	15003.6
1517	8432.46	1517	7934.04	1517	10408.2	1517	8838.91	1517	14237.8	1517	13962.5	1517	13354.7	1517	16824.4
1518	7371.51	1518	6813.66	1518	10481.5	1518	8530.3	1518	15592.8	1518	14656.9	1518	13941.3	1518	18915.2
1519	7653.31	1519	7935.58	1519	11170	1519	9108.93	1519	16315.8	1519	15679.3	1519	14064	1519	19978.9
1520	6658.4	1520	7017.59	1520	12042.2	1520	9895.76	1520	15714.5	1520	13662.7	1520	26748.6	1520	23062.5
1521	6133.34	1521	6474.33	1521	13548.9	1521	11476.2	1521	15581.3	1521	15967.9	1521	25812.9	1521	22040.3
1522	6437.7	1522	6050.63	1522	13897.3	1522	11796.6	1522	13652.8	1522	14244.1	1522	28307.8	1522	22435.5
1523	6411.66	1523	5762.4	1523	15566.5	1523	11666.4	1523	13283.3	1523	14760.3	1523	27472.7	1523	21497.9
1524	6526.62	1524	5770.81	1524	15371.5	1524	12120.9	1524	12908.9	1524	13684.1	1524	25047.3	1524	16650.5
1525	6870.93	1525	5920.27	1525	15131.2	1525	12428.2	1525	12000.9	1525	13823.7	1525	20974.9	1525	15879.3
1526	7027.81	1526	6646.26	1526	13082.2	1526	11906.8	1526	12018	1526	12700.3	1526	21809.8	1526	17940.8
1527	7958.25	1527	7069.27	1527	11711	1527	10856.7	1527	15463.2	1527	13969.5	1527	20884.8	1527	12895.6
1528	8306.27	1528	6631.24	1528	11443.6	1528	10131.6	1528	14725.3	1528	13726.2	1528	23978.2	1528	18899.8
1529	8537.86	1529	6399.47	1529	10304.1	1529	8794.78	1529	15618.9	1529	14700.1	1529	24140.5	1529	19341.4
1530	9679.12	1530	7254.99	1530	9288.19	1530	7962.78	1530	15374.8	1530	14548.6	1530	24531.1	1530	19186.6
1531	9588.35	1531	6678.18	1531	8960.96	1531	7903.96	1531	15086.2	1531	13626.4	1531	22478	1531	15859.5
1532	9629.98	1532	8012.43	1532	9097.15	1532	7975.12	1532	14927	1532	12751.7	1532	25651.1	1532	18100.3
1533	9658.56	1533	7522.75	1533	9047.95	1533	8109.23	1533	13214.2	1533	12018.6	1533	22161.3	1533	12708.9
1534	9233.07	1534	6531.85	1534	9174.65	1534	8775.9	1534	13085.6	1534	12492.3	1534	26468.8	1534	18289.7
1535	9215.17	1535	6290.59	1535	8256.9	1535	7589.38	1535	14176.1	1535	12927.4	1535	24344.6	1535	16128.9
1536	9059.5	1536	6518.96	1536	6686.17	1536	6836.2	1536	15238	1536	12950.6	1536	24233	1536	16341.3
1537	9064.24	1537	7573.67	1537	6774.21	1537	6600.28	1537	15423	1537	12993.3	1537	21854.8	1537	13273.4
1538	9488.37	1538	7946.99	1538	7041.06	1538	6183.73	1538	15657	1538	13084.7	1538	23249.7	1538	14234.2
1539	9619.14	1539	8176.85	1539	5898.08	1539	4318.33	1539	15995.8	1539	13166.7	1539	27363.1	1539	18502.1
1540	9194.65	1540	7947.84	1540	6306.43	1540	4130.17	1540	14642.5	1540	12006.4	1540	23372.7	1540	12397.5
1541	8456.52	1541	6707	1541	5496.23	1541	3884.84	1541	14262.3	1541	12397.1	1541	21725.8	1541	12212.9
1542	9954.51	1542	7042.21	1542	6285.32	1542	4096.87	1542	14482.3	1542	13037.4	1542	18342.3	1542	11423.6
1543	9002.13	1543	6154.67	1543	8501.35	1543	5515.9	1543	16122.8	1543	13111.6	1543	21183.8	1543	12638
1544	10243.8	1544	6910.85	1544	10438	1544	6774.83	1544	18498.4	1544	16174.2	1544	19292.2	1544	11557.6
1545	10009.1	1545	6771.22	1545	9756.25	1545	6425.32	1545	19934.8	1545	15481.1	1545	15084.8	1545	10036.8
1546	8310.93	1546	5914.93	1546	8183.26	1546	5822.82	1546	19713.2	1546	14139.3	1546	11500.1	1546	10740.1
1547	8542.2	1547	6097.98	1547	9960.72	1547	7730.24	1547	20228.9	1547	12732.8	1547	9938	1547	11211.6
1548	10631.4	1548	7262.77	1548	9103.23	1548	7816.17	1548	16984.2	1548	11241.8	1548	10225.8	1548	11712.6
1549	8620.01	1549	6098.79	1549	10524.4	1549	8468.9	1549	18283.7	1549	12930.3	1549	12003.2	1549	14740.6
1550	6669.47	1550	5369.89	1550	10095	1550	8391.83	1550	17684	1550	14119.9	1550	15486.5	1550	18912.4
1551	9195.81	1551	6438.65	1551	11315.3	1551	8491.26	1551	15844.2	1551	12245.7	1551	19185.2	1551	19826.2
1552	10797	1552	8645.22	1552	11191.3	1552	8526.27	1552	13031.8	1552	11588.2	1552	21671.2	1552	18564.8
1553	9069.67	1553	6724.94	1553	11011.5	1553	7460.57	1553	12232.6	1553	11395.6	1553	22003.4	1553	16725.5
1554	7715.37	1554	6488.57	1554	9982.56	1554	6485.22	1554	11218.5	1554	10338	1554	20265.4	1554	14752.8
1555	7316.2	1555	5785.45	1555	9067.7	1555	5748.08	1555	10147.6	1555	9576.85	1555	17336.1	1555	12936.9
1556	7735.77	1556	6719.52	1556	8606.43	1556	5160.78	1556	9475.32	1556	9083.23	1556	15591.1	1556	13214.9
1557	8050.49	1557	7374.56	1557	8487.13	1557	5287.92	1557	9560.71	1557	9618.43	1557	16490.1	1557	15851.5
1558	8038.55	1558	6376.71	1558	7797.14	1558	4478.34	1558	10158.3	1558	8631.57	1558	18909.9	1558	17997.3
1559	7991.26	1559	6231.45	1559	8557.45	1559	5917.92	1559	9534.03	1559	8873.61	1559	20642.9	1559	19041.3
1560	7468.13	1560	5914.5	1560	8862	1560	6061.7	1560	10363.6	1560	8252.87	1560	21350.2	1560	19706.9
1561	9059.43	1561	6996.48	1561	8662.53	1561	5338.41	1561	10087.6	1561	9626.72	1561	21188.1	1561	19203.5
1562	9427.07	1562	7424.18	1562	9842.66	1562	6817.9	1562	10556.2	1562	8626.1	1562	20073.3	1562	17107.2
1563	8063.2	1563	6604.36	1563	11348.4	1563	8147.07	1563	10246.9	1563	9092.75	1563	18133.5	1563	14623.2
1564	8088.73	1564	6435.1	1564	12655.9	1564	8369.95	1564	10483.3	1564	8973.83	1564	15775.9	1564	12567.4
1565	8088.05	1565	5453.48	1565	11427.1	1565	8517.06	1565	11024.6	1565	8879.66	1565	14169.4	1565	12168.5
1566	7380.86	1566	5437.82	1566	12766.9	1566	8754.91	1566	10044.2	1566	8376.47	1566	13583.6	1566	13111.7
1567	6734.25	1567	5122.51	1567	11414.2	1567	7853.88	1567	9458.45	1567	8789.69	1567	13952.1	1567	14211.2
1568	7032.78	1568	5445.97	1568	14275.1	1568	9552.63	1568	8344.89	1568	8388.43	1568	14780	1568	15691.7
1569	7882.06	1569	6045.59	1569	14895	1569	10112.5	1569	8248.61	1569	8026.8	1569	16878.8	1569	17503.5
1570	8559	1570	6500.53	1570	15132.7	1570	10946.8	1570	8192.8	1570	7762.99	1570	19838.7	1570	22205.3
1571	8107.93	1571	6251.02	1571	18978.2	1571	16147.4	1571	7704.84	1571	8450.24	1571	23380.7	1571	23622.5
1572	8112.56	1572	6581.66	1572	17190.8	1572	13960.5	1572	8609.42	1572	7610.02	1572	25362.5	1572	25812.2
1573	7672.34	1573	6595.56	1573	20615.4	1573	17815.3	1573	8125.61	1573	7497.01	1573	26147.4	1573	25248.2
1574	7450.92	1574	5838.76	1574	22517.1	1574	21910.7	1574	8030.45	1574	8449.68	1574	27178.5	1574	24759.2
1575	7235.84	1575	5780.75	1575	20926.2	1575	20755.7	1575	7971.15	1575	6948.63	1575	28172	1575	27034.6
1576	7711.6	1576	5798.71	1576	21345.8	1576	20679.3	1576	7347.58	1576	8343.99	1576	28118.3	1576	30779.8
1577	8419.85	1577	5985.06	1577	23732.5	1577	21452.2	1577	7856.94	1577	8664.33	1577	29278.7	1577	31937.6
1578	9309.48	1578	6275.86	1578	21598.5	1578	18409	1578	8138.22	1578	7704.6	1578	30867.4	1578	35505.8
1579	9320.61	1579	6324.67	1579	18656	1579	18275.8	1579	8818.68	1579	7167.52	1579	33412.3	1579	35211.6
1580	8910.77	1580	7323.33	1580	16030.7	1580	16698.9	1580	9589.07	1580	7380.53	1580	35926.9	1580	32931.4
1581	9321.53	1581	7595.93	1581	14875	1581	15041	1581	9662.15	1581	6920.5	1581	31881.2	1581	27705.4
1582	9595.48	1582	7562.51	1582	18534.2	1582	17730.7	1582	9968.51	1582	7840.14	1582	29016.5	1582	25208.3
1583	10094.9	1583	8087.65	1583	20374.5	1583	19553	1583	10034.2	1583	9021.84	1583	28789	1583	24227.2
1584	9662.31	1584	7000.11	1584	16610.2	1584	17067.2	1584	11733.1	1584	10723	1584	28133.6	1584	22841.2
1585	7410.47	1585	5766.09	1585	15229.7	1585	14969.6	1585	12136.3	1585	11415.9	1585	27537.3	1585	22421.8
1586	7600.59	1586	6022.78	1586	18455	1586	18677.5	1586	12736.9	1586	9980.82	1586	24944.6	1586	21849.6
1587	6132.5	1587	4747.21	1587	18446.7	1587	17849.9	1587	13237.9	1587	9863.85	1587	24264.1	1587	21647.4
1588	4912.36	1588	4148.62	1588	16671.2	1588	15107.3	1588	13028.1	1588	10312	1588	24612.2	1588	20801
1589	4443.42	1589	3612.77	1589	15445.4	1589	14116.5	1589	14668.5	1589	10676.7	1589	24703.5	1589	21088.2
1590	4180.99	1590	3738.21	1590	17268.9	1590	15467.5	1590	15185.2	1590	11853.2	1590	30199.4	1590	26151.7
1591	3798.52	1591	3838.86	1591	15758.2	1591	13818.4	1591	13890	1591	12205.3	1591	31667	1591	27563
1592	3611.85	1592	3753.74	1592	13295.7	1592	12927.6	1592	12265.3	1592	12256.6	1592	34213.3	1592	30694.3
1593	4157.71	1593	3702.23	1593	14293.3	1593	13143.6	1593	14256	1593	12880.7	1593	37792.9	1593	34924.9
1594	4270.22	1594	3694.73	1594	11742.5	1594	11230.7	1594	14985.5	1594	14580	1594	37085.1	1594	35910.1
1595	4867.07	1595	4131.1	1595	10881	1595	10424.3	1595	12497.3	1595	12627.9	1595	36625.6	1595	37029.2
1596	6576.45	1596	4736.32	1596	13224.2	1596	12123.5	1596	15599	1596	13578.5	1596	37159.1	1596	33751.1
1597	7850.66	1597	5904.6	1597	12044.1	1597	11416.5	1597	15135	1597	13859.8	1597	34270.1	1597	32971
1598	8682.74	1598	6256.73	1598	10893.9	1598	10922	1598	13381.9	1598	10966	1598	32654.2	1598	33481.8
1599	8307.23	1599	6726.84	1599	14061.9	1599	13723.1	1599	12391.2	1599	9550.44	1599	28464.2	1599	28334.1
1600	8322.41	1600	6917.08	1600	11962.7	1600	12150	1600	11508.2	1600	9039.18	1600	27317.9	1600	28212.7
1601	8807.23	1601	7095.62	1601	11321	1601	11560.9	1601	9583.73	1601	7700.5	1601	28089.2	1601	27290.7
1602	9093.42	1602	7091.89	1602	13414.1	1602	11948.7	1602	7635.96	1602	6046.9	1602	30943	1602	25721.7
1603	8995.59	1603	7041.7	1603	13087.1	1603	11671.3	1603	6830.31	1603	5834.79	1603	27950.8	1603	23739.3
1604	8845.58	1604	7065.8	1604	15143	1604	13035.8	1604	6718.23	1604	5879.6	1604	26938.1	1604	22732.4
1605	9162.16	1605	7186.19	1605	15744.3	1605	13426.2	1605	6473.39	1605	6289.32	1605	23644.7	1605	21684.6
1606	9887.01	1606	7660.08	1606	14884.8	1606	13709.4	1606	6995.4	1606	6781.75	1606	25956.6	1606	23987.4
1607	9911.66	1607	7546.51	1607	12859.7	1607	12482.5	1607	7389.78	1607	7408.74	1607	22701.3	1607	22539.5
1608	10577.3	1608	7819.62	1608	10160.8	1608	9748.54	1608	8116.15	1608	7349.67	1608	20107	1608	19095.5
1609	11290.2	1609	8018.72	1609	9972.42	1609	9350.46	1609	8222.8	1609	6496.2	1609	18808.1	1609	18215.7
1610	11268.7	1610	8436.65	1610	11886.1	1610	9639.14	1610	9138.73	1610	6980.54	1610	17792.3	1610	18658.8
1611	10389.6	1611	8730.38	1611	10699	1611	8813.92	1611	9122.77	1611	7467.66	1611	16266.4	1611	16518.7
1612	10719.4	1612	8828.32	1612	10462.7	1612	9252.09	1612	8881.89	1612	6657.97	1612	14812.5	1612	14596.5
1613	10801.2	1613	8398.1	1613	12704.6	1613	9728.78	1613	9452.73	1613	6377.39	1613	19213.4	1613	15867.2
1614	10728.1	1614	8712.07	1614	12865.4	1614	9771.83	1614	9962.76	1614	6890.81	1614	15944.3	1614	15553.2
1615	11160	1615	9357.24	1615	13247.9	1615	11211.4	1615	9178.49	1615	6097.54	1615	12695.4	1615	14404.8
1616	11444.9	1616	9591.97	1616	11703.6	1616	10624.9	1616	9382.88	1616	6779.49	1616	9967.73	1616	11588.6
1617	10723.2	1617	9821.08	1617	11881.5	1617	9446.85	1617	8886.31	1617	8191.64	1617	13000.7	1617	12635.8
1618	11429	1618	10349	1618	9937.92	1618	8865.94	1618	8899.23	1618	8431.71	1618	9958.14	1618	10898.4
1619	7976.91	1619	7444.66	1619	9228.88	1619	7630.87	1619	8669.92	1619	8229.2	1619	12813.4	1619	10536.2
1620	9460.77	1620	9035.08	1620	8745.64	1620	8429.5	1620	9064.03	1620	7847.29	1620	14980.6	1620	11370.6
1621	9798.57	1621	9827.71	1621	8221.18	1621	7685.1	1621	8911.65	1621	6946.52	1621	16201.4	1621	11610.9
1622	11172.6	1622	10653.6	1622	7538.45	1622	6942.94	1622	7775.99	1622	5869.86	1622	15883.8	1622	12969.4
1623	11542.7	1623	10389.4	1623	9351.29	1623	7840.27	1623	6074.3	1623	4479.37	1623	14559.4	1623	11998
1624	9859.58	1624	8493.2	1624	9102.01	1624	7902.37	1624	7478.89	1624	6236.07	1624	13358.5	1624	12329.1
1625	10818.9	1625	9261.68	1625	9862.29	1625	8396.35	1625	8394.78	1625	6691.64	1625	13491.7	1625	11720.9
1626	9928.81	1626	6951.45	1626	11175.6	1626	9404.05	1626	8398.18	1626	6684.43	1626	12989.8	1626	11997.8
1627	9785	1627	6639.72	1627	9843.89	1627	8547.77	1627	8226.19	1627	6939.7	1627	15078.8	1627	11099.5
1628	10087.7	1628	7022.98	1628	9497.81	1628	7995.1	1628	8839.83	1628	7343.74	1628	12463.9	1628	9581.6
1629	9882.14	1629	7542.62	1629	9929.36	1629	7193.84	1629	9213.63	1629	7545.98	1629	12813.6	1629	13925.6
1630	10543.3	1630	8202.31	1630	8475.27	1630	4698.98	1630	8751.87	1630	7497.32	1630	9561.14	1630	13804.1
1631	10404.6	1631	9062.62	1631	9021.37	1631	5754.92	1631	8160.75	1631	7068.07	1631	8648.82	1631	8461.09
1632	10333.3	1632	8921.7	1632	10316.5	1632	7077.39	1632	8466.53	1632	7269.57	1632	9714.93	1632	9262.1
1633	10364.6	1633	8133.3	1633	9470.55	1633	6929.31	1633	9042.73	1633	7021.04	1633	10268.6	1633	10425
1634	10366.2	1634	7545.55	1634	10268.4	1634	8442.49	1634	8896.92	1634	7483.28	1634	10127.7	1634	11667
1635	11137.4	1635	8202.57	1635	10038.1	1635	9550.81	1635	8788.87	1635	7120.14	1635	8577.79	1635	9327.67
1636	12641	1636	10094.3	1636	8294.95	1636	8281.38	1636	8831.28	1636	7273.75	1636	8332.03	1636	9496.45
1637	11966.4	1637	9207.94	1637	8789.99	1637	8436.95	1637	8668.95	1637	7885.28	1637	6220.28	1637	8829.25
1638	11179.3	1638	8400.67	1638	8092.86	1638	7208.81	1638	8878.11	1638	8363.67	1638	5023.77	1638	7150.7
1639	10373	1639	7415.13	1639	9266.77	1639	7485.31	1639	8882.95	1639	8238.65	1639	5337.74	1639	4215.95
1640	12854	1640	9094.86	1640	9237.19	1640	6906.07	1640	9443.98	1640	7957.26	1640	4786.64	1640	3322.11
1641	12713	1641	8446.88	1641	9118.06	1641	7639.45	1641	10847.6	1641	8786.47	1641	4765.02	1641	2617.17
1642	11281.5	1642	7143.19	1642	7947.94	1642	7743.14	1642	9693.98	1642	8985.7	1642	6573.14	1642	2852.79
1643	14690	1643	11712.3	1643	6567.28	1643	6988.02	1643	10958.1	1643	9285.39	1643	7346.27	1643	2469.38
1644	12282.7	1644	9802.69	1644	6165.65	1644	6220.1	1644	10706.6	1644	9662.75	1644	9412.65	1644	3858.07
1645	15381.7	1645	12974.9	1645	5943.52	1645	5573.99	1645	10935	1645	10284	1645	11000.5	1645	5614.65
1646	13988.5	1646	10423.9	1646	6096.32	1646	5434.71	1646	9195.69	1646	9377.53	1646	11518.2	1646	5433.89
1647	14473.8	1647	11183.3	1647	6530.37	1647	5857.84	1647	10505.1	1647	8665.77	1647	11500.6	1647	6912.42
1648	14747.6	1648	11162.2	1648	6736.81	1648	5974.64	1648	8256.54	1648	7128.9	1648	11641.5	1648	7436.27
1649	15435.3	1649	11940.9	1649	6494.1	1649	5537.63	1649	6933.51	1649	6594.71	1649	12685.9	1649	9148.37
1650	15889.8	1650	12664.1	1650	5689.28	1650	4212.61	1650	6915.48	1650	6393.51	1650	12281.6	1650	7493.89
1651	17032.9	1651	12800	1651	6726.26	1651	5776.03	1651	7689.78	1651	5687.63	1651	12204	1651	8022.35
1652	16911.4	1652	12739.1	1652	6818	1652	6066.65	1652	6955	1652	6655.82	1652	11178.5	1652	8794.36
1653	17875.6	1653	13715.2	1653	6548.33	1653	5266.64	1653	6352.72	1653	5963.81	1653	11789.5	1653	9254.29
1654	13174.5	1654	11013.6	1654	6503.57	1654	5155.39	1654	8132.81	1654	7056.79	1654	11654.8	1654	9782.96
1655	15271.4	1655	12532.7	1655	5961.35	1655	5139.88	1655	9858.92	1655	8879.06	1655	14176.8	1655	11579.1
1656	14398.3	1656	11101.3	1656	5280.56	1656	4909.68	1656	9562.66	1656	8638.04	1656	14515.4	1656	12633.6
1657	10559.7	1657	9294.86	1657	5295.25	1657	5181.84	1657	8831.64	1657	7968.13	1657	14212.1	1657	13663.8
1658	9245.77	1658	7974.58	1658	5819.55	1658	5861.36	1658	7486.61	1658	6933.2	1658	13657	1658	14786.9
1659	10799.4	1659	9506.56	1659	6252.23	1659	6635.76	1659	7122.61	1659	6970.78	1659	13373.8	1659	16219.6
1660	10109.1	1660	8931.7	1660	4823.83	1660	5163.06	1660	6835.12	1660	5972.05	1660	14520.9	1660	17617
1661	9220.81	1661	7122.44	1661	3378.4	1661	3140.99	1661	6318.35	1661	6397.16	1661	16051.8	1661	18558.9
1662	7330.65	1662	5697.51	1662	2916.73	1662	2667.71	1662	5818.61	1662	6448.49	1662	16067	1662	18678.4
1663	8629.1	1663	6119.53	1663	3807.9	1663	2543.07	1663	6502.31	1663	7574.39	1663	21903.6	1663	22281.2
1664	6677.84	1664	5469.42	1664	4979.92	1664	3788.41	1664	7054.35	1664	7532.87	1664	20092	1664	21980
1665	6345.04	1665	5111.28	1665	5438.49	1665	3728.74	1665	8442.59	1665	7038.73	1665	22395.8	1665	24819.9
1666	7623.45	1666	6325	1666	6278.21	1666	5160.48	1666	10307.6	1666	8437.75	1666	20477.2	1666	24295.6
1667	9808.52	1667	7839.31	1667	6577.71	1667	5089.79	1667	11953.9	1667	8219.58	1667	22332.3	1667	25154.7
1668	8908.45	1668	7087.11	1668	7311.63	1668	6002.73	1668	11285.5	1668	7581.22	1668	17656.8	1668	22549.7
1669	8450.51	1669	6963.19	1669	7764.22	1669	6454.94	1669	11746.7	1669	7518.96	1669	18798.2	1669	23038.5
1670	9400.24	1670	7745.68	1670	9562.19	1670	8012.8	1670	11368.6	1670	8776.4	1670	20158.3	1670	22928.7
1671	7392.26	1671	5983.13	1671	9447.19	1671	7786.95	1671	12722.8	1671	11603.9	1671	16864.1	1671	20144.5
1672	7856.97	1672	6160.07	1672	8028.94	1672	6157.66	1672	12448.2	1672	12534.8	1672	17067.5	1672	19468.3
1673	8083.15	1673	6407.1	1673	6474.25	1673	5362.68	1673	10587.1	1673	11122.6	1673	20692.7	1673	21960.7
1674	7673.22	1674	6559.44	1674	7307.5	1674	6162.64	1674	11663.4	1674	11618.4	1674	19269.3	1674	21281.6
1675	6268.36	1675	5130.36	1675	7127.33	1675	7671.93	1675	8265.83	1675	8516.31	1675	17795.2	1675	21924.3
1676	6228.3	1676	5125.33	1676	6376.35	1676	6528.54	1676	6839.85	1676	6612.87	1676	19463.1	1676	24283
1677	6275.65	1677	4882.37	1677	6444.91	1677	7807.38	1677	6289.38	1677	6506.24	1677	21369.7	1677	24515.6
1678	5927.96	1678	4086.21	1678	6741.96	1678	7805.91	1678	5986.67	1678	5718.36	1678	17567	1678	24031.9
1679	6816.34	1679	4579.32	1679	5109.97	1679	5673.32	1679	6074.24	1679	5324.89	1679	17211.9	1679	20326.4
1680	6485.09	1680	4844.97	1680	4260.03	1680	5122.72	1680	6722.17	1680	5808.39	1680	14986.9	1680	18704.2
1681	5087.36	1681	4372.19	1681	3846.29	1681	4380.16	1681	6896.17	1681	5870.97	1681	13281.4	1681	15606.4
1682	4752.66	1682	3950.25	1682	4116.67	1682	3692.36	1682	8401.37	1682	7217.06	1682	13280.9	1682	12971.5
1683	5223.13	1683	3997.36	1683	5057.74	1683	3455.78	1683	7909.76	1683	7185.95	1683	16094.2	1683	13202.4
1684	5253.65	1684	3803.97	1684	5794.68	1684	4914.8	1684	6871.87	1684	6179.1	1684	16446.6	1684	12292.8
1685	5399.31	1685	3658.34	1685	5896.25	1685	5928.75	1685	6462.99	1685	5809.63	1685	17015.5	1685	13353.7
1686	6414.8	1686	4535.64	1686	6020.27	1686	5706.44	1686	6484.64	1686	5030.3	1686	21020.1	1686	16749.9
1687	8095.22	1687	6262.85	1687	5816.84	1687	4712.86	1687	8767.59	1687	5419.22	1687	20415.2	1687	17258.2
1688	8459.45	1688	6389.31	1688	6205.8	1688	4294.49	1688	10433.8	1688	6703.31	1688	20031.4	1688	17005.6
1689	8176.28	1689	5996.43	1689	6897.93	1689	4476.62	1689	10171.6	1689	6211.62	1689	20744	1689	17784.9
1690	9046.02	1690	6487.99	1690	10675.3	1690	7014.37	1690	10055.1	1690	6757.37	1690	20472.7	1690	17779.3
1691	11321.9	1691	8021.03	1691	9531.19	1691	6350.45	1691	9995.37	1691	7151.83	1691	20745.9	1691	18664.2
1692	10814	1692	8565.4	1692	12840.1	1692	9615.8	1692	11385	1692	8199.99	1692	20374.9	1692	19568
1693	11296.6	1693	9987.75	1693	11960.9	1693	9453.38	1693	11260.2	1693	7866.44	1693	20058.3	1693	17283.5
1694	11969.6	1694	10344	1694	11463.6	1694	8098	1694	12460.4	1694	9244.92	1694	20117.1	1694	14751.4
1695	14209.7	1695	11324.8	1695	12874.7	1695	9627.88	1695	13081.6	1695	9223.94	1695	21574.6	1695	14111.5
1696	13179.6	1696	11781.7	1696	9742.79	1696	6141.81	1696	13530.3	1696	11373.3	1696	22929.6	1696	13784.9
1697	15211.6	1697	12956	1697	6862.37	1697	4558.57	1697	13317.1	1697	11033.2	1697	24570.1	1697	15225
1698	12217.4	1698	11189.4	1698	6044.35	1698	4213.94	1698	12206	1698	11800.4	1698	28602	1698	16525.6
1699	12912.7	1699	11966.8	1699	5602.09	1699	3377.1	1699	10629.8	1699	10575.5	1699	24384.3	1699	14294.7
1700	10876.7	1700	10393.5	1700	4380.45	1700	3737.42	1700	8300.36	1700	6625.66	1700	23084.5	1700	13165.3
1701	10043	1701	9648.95	1701	3992.87	1701	3047.89	1701	7469.15	1701	6648.59	1701	24720.6	1701	15479
1702	9251.67	1702	8643.48	1702	3671.31	1702	2704.94	1702	6538.4	1702	5947.54	1702	20383.6	1702	11559.9
1703	7627.68	1703	7836.47	1703	4679.5	1703	3983.5	1703	5608.02	1703	4541.63	1703	19504.1	1703	10071.5
1704	5380.62	1704	6062.1	1704	5134.33	1704	4474.01	1704	6783.26	1704	5260.02	1704	24117.2	1704	11505.3
1705	5772.07	1705	6078.01	1705	4412.82	1705	4173.12	1705	5444.22	1705	4353.46	1705	18206.1	1705	8220.33
1706	4387.41	1706	4586.3	1706	5844.79	1706	5252.25	1706	6575.37	1706	6414.31	1706	18633.8	1706	8461.88
1707	5154.76	1707	6051.19	1707	5985.29	1707	5080.75	1707	5675.48	1707	5982.16	1707	20939.6	1707	9130.76
1708	3571.04	1708	4151.19	1708	6005.01	1708	4272.89	1708	6677.54	1708	5775.44	1708	15835.7	1708	4950.41
1709	4342.46	1709	4872.62	1709	6735.36	1709	4808.79	1709	6870.68	1709	6016.34	1709	16828.6	1709	7051.29
1710	4599.41	1710	4604.26	1710	7354.44	1710	5928.04	1710	5462.89	1710	5226.99	1710	14952.5	1710	7087.46
1711	3318.86	1711	3231.61	1711	6838.94	1711	5756.68	1711	4918.57	1711	3664.78	1711	10139.6	1711	5656.49
1712	6159.51	1712	6259.82	1712	8701.93	1712	7232.03	1712	4211.15	1712	3252.99	1712	12199.6	1712	6633.02
1713	7672.22	1713	7865.44	1713	7921.98	1713	6756.45	1713	4574.81	1713	3977.45	1713	14413.8	1713	8331.67
1714	7504.78	1714	7243.86	1714	7912.31	1714	5498.76	1714	4681.33	1714	5046.4	1714	16767.9	1714	11689.1
1715	6859.18	1715	6306.54	1715	6665.18	1715	4777.36	1715	4998.16	1715	3484.8	1715	17968.1	1715	16426.5
1716	8259.51	1716	6661.79	1716	6301.1	1716	5440.47	1716	4852.68	1716	2677.8	1716	18844.6	1716	18677.3
1717	13116	1717	10399.9	1717	6407.65	1717	5403.93	1717	4180.96	1717	2158.49	1717	12919.9	1717	22074.7
1718	16337.2	1718	13395.7	1718	5967.98	1718	4899.01	1718	5209.57	1718	2571.86	1718	11585.8	1718	17013.9
1719	17820	1719	15456.2	1719	5222.01	1719	4520.91	1719	5293.6	1719	3055.05	1719	8476.38	1719	11324.7
1720	17995.7	1720	15137.1	1720	4614.36	1720	4217.86	1720	5491.04	1720	3747.24	1720	8441.06	1720	8165.38
1721	19821.4	1721	16874.7	1721	4478.43	1721	4117.57	1721	7225.19	1721	4832.05	1721	10997	1721	8605.29
1722	17266.5	1722	14480.3	1722	4947.62	1722	5286.31	1722	10281.9	1722	6381.43	1722	9733.07	1722	8086.03
1723	19664	1723	16177	1723	6374.21	1723	6112.93	1723	10519.9	1723	7033.17	1723	9121.51	1723	8981.08
1724	20848.1	1724	18523.4	1724	7200.77	1724	5752.32	1724	14630	1724	10115.1	1724	7336.03	1724	7925.82
1725	17990.8	1725	16787.5	1725	6941.1	1725	4722.39	1725	12447.4	1725	9066.57	1725	6910.36	1725	8708.32
1726	13503.3	1726	11831.6	1726	5923.06	1726	3994.15	1726	10767.8	1726	7970.3	1726	6725.09	1726	8443.84
1727	14454	1727	13163.3	1727	5405.33	1727	3682.56	1727	10769.6	1727	7842.99	1727	6565.17	1727	6572.28
1728	8793.77	1728	7496.93	1728	5308.39	1728	3699.76	1728	8643.78	1728	6459.6	1728	5738.93	1728	4679.71
1729	7505.14	1729	5149.12	1729	5266.45	1729	3982.91	1729	6911.55	1729	4802.71	1729	4103.97	1729	4058.11
1730	6979.65	1730	5128.04	1730	6401.65	1730	5086.48	1730	6880.26	1730	4396.5	1730	5015.66	1730	4018.33
1731	5023.84	1731	3561.21	1731	7154.35	1731	5502.51	1731	5238.56	1731	4086.22	1731	6219.18	1731	3898.09
1732	4470.74	1732	3588.6	1732	7024.23	1732	4625.28	1732	6082.33	1732	3555.99	1732	6898.5	1732	4388.29
1733	4360.49	1733	4051.53	1733	6216.35	1733	3565.95	1733	6616.76	1733	3896.24	1733	8539.89	1733	7015.79
1734	4932.12	1734	5001.46	1734	5564.7	1734	3803.2	1734	7956.77	1734	5887.26	1734	8075.03	1734	7423.87
1735	6005.54	1735	5874.75	1735	5151.52	1735	4398.73	1735	7881.82	1735	5549.5	1735	7997	1735	7322.79
1736	5327.69	1736	6548.03	1736	5142.23	1736	4304.13	1736	8952.32	1736	7063.21	1736	7092.24	1736	6091.19
1737	4263.93	1737	4832.01	1737	6122.84	1737	5617.31	1737	8328.57	1737	7454.94	1737	5790.98	1737	4731.27
1738	3267.07	1738	3220.89	1738	5754.95	1738	5495.61	1738	7266.28	1738	6509.66	1738	3873.67	1738	3231.32
1739	4555.3	1739	4427.4	1739	6891.44	1739	6852.17	1739	7681.45	1739	6831.53	1739	4445.07	1739	3044.95
1740	4020.99	1740	3474.43	1740	7468.21	1740	7836.77	1740	7569.86	1740	7056.5	1740	5078.69	1740	3186.09
1741	3824.33	1741	2938.78	1741	6159.97	1741	5409.22	1741	8008.78	1741	6455.66	1741	8548.51	1741	5710.53
1742	4475.6	1742	2900.7	1742	6098.29	1742	4432.12	1742	6647.37	1742	6152.14	1742	9862.39	1742	8141.57
1743	5423.24	1743	3689.42	1743	7143.38	1743	4935.31	1743	6430.66	1743	6498.33	1743	10924.7	1743	10137.3
1744	6341.43	1744	4679.62	1744	8532.11	1744	6236.42	1744	5681.02	1744	6287.17	1744	10985	1744	9893.64
1745	6592.12	1745	4715.24	1745	8058.19	1745	6669.25	1745	4994.12	1745	6022.51	1745	11969.9	1745	10511.8
1746	6362.77	1746	5050.12	1746	7144.17	1746	6072.23	1746	6345.25	1746	6353.48	1746	10176.8	1746	6837.09
1747	6036.23	1747	5711.91	1747	6253.99	1747	4833.68	1747	6344.05	1747	9138.52	1747	12019.5	1747	8107.3
1748	6033.39	1748	6641.54	1748	4684	1748	3173.21	1748	4836.69	1748	6609.35	1748	11278.5	1748	7593.61
1749	5198.14	1749	6154.7	1749	4138.71	1749	2554.48	1749	5852.59	1749	7641.4	1749	9607.73	1749	7532.07
1750	6298.02	1750	5229.33	1750	4017.76	1750	3114.9	1750	6577.92	1750	7301.08	1750	9929.97	1750	7968.55
1751	5987.46	1751	5045.01	1751	4681.46	1751	4155.79	1751	7573.03	1751	7147.03	1751	10767.1	1751	6788.82
1752	5895.46	1752	4843.74	1752	7339.45	1752	6180.57	1752	7740.98	1752	7222.26	1752	9529.76	1752	7735.85
1753	6384.47	1753	5174.93	1753	9427.1	1753	7699.29	1753	9171.31	1753	7282.66	1753	8579	1753	6915.04
1754	6123.56	1754	5421.37	1754	9594.3	1754	6852.57	1754	9947.72	1754	8910.9	1754	9064.49	1754	6448.72
1755	6566.03	1755	6252.67	1755	8983.28	1755	8466.6	1755	8561.21	1755	9370.11	1755	7795.37	1755	5958.43
1756	5211.79	1756	4845.23	1756	9328.52	1756	9285.99	1756	7056.2	1756	8031.62	1756	6728.02	1756	7882.33
1757	4802.4	1757	4612.13	1757	9167.52	1757	8684.87	1757	6896.86	1757	6548.95	1757	7168.11	1757	9428.25
1758	4244.98	1758	4148.22	1758	6585.4	1758	5588.24	1758	6581.89	1758	6408.16	1758	7243.58	1758	8649.14
1759	3781.45	1759	3812.05	1759	6708.65	1759	4930.96	1759	5522	1759	5805.3	1759	7316.57	1759	10695.2
1760	3702.51	1760	2826.94	1760	6544.59	1760	5162.74	1760	5776.38	1760	4882.28	1760	7419.37	1760	11471.9
1761	3955.38	1761	2586.29	1761	7848.33	1761	6821.45	1761	6747.82	1761	5622.32	1761	6768.22	1761	11475.3
1762	4836.21	1762	3506.41	1762	8193	1762	7934.59	1762	7782.8	1762	5705.92	1762	7301.8	1762	10434.3
1763	5819.24	1763	4699.89	1763	7870	1763	7511.81	1763	8191.06	1763	7251.27	1763	6590.74	1763	7968.84
1764	5774.75	1764	4523.42	1764	8606.95	1764	8105.54	1764	8263.03	1764	8750.52	1764	3974.67	1764	4909.02
1765	5781.88	1765	4441.59	1765	7610.55	1765	7628.62	1765	9461.61	1765	7648.69	1765	2941.06	1765	3801.32
1766	5820.35	1766	4386.71	1766	6275.43	1766	6298.53	1766	7724.93	1766	6873.78	1766	2588.02	1766	3445.27
1767	7024.53	1767	5320.03	1767	6073.32	1767	5238.08	1767	7609.82	1767	6248.44	1767	2295.04	1767	3056.78
1768	8277.47	1768	7381.89	1768	6968.61	1768	5311.39	1768	8483	1768	6562.21	1768	3148.11	1768	3528.93
1769	8432.64	1769	8468.09	1769	8037.65	1769	5679.55	1769	8332.22	1769	6173.54	1769	3435.37	1769	3862.4
1770	8757.29	1770	8877.73	1770	9486.38	1770	6423.77	1770	7417.01	1770	5891.27	1770	3682.86	1770	3482.72
1771	7892.48	1771	6952.12	1771	10685.1	1771	7333.13	1771	6203.88	1771	5512.05	1771	4322.74	1771	3172.1
1772	7608.22	1772	6277.85	1772	8397.81	1772	5520.84	1772	6172.76	1772	6273.14	1772	4305.44	1772	4820.51
1773	6466.83	1773	5098.74	1773	8025.99	1773	5923.86	1773	8371.81	1773	8837.12	1773	5664.1	1773	5303.14
1774	5669.01	1774	4513.78	1774	5331.5	1774	3842.42	1774	10791.9	1774	10602.7	1774	6562.85	1774	6620.78
1775	5713.49	1775	4254.09	1775	4073.21	1775	2764.82	1775	15679.4	1775	13588.2	1775	8273.63	1775	7266.85
1776	4988.02	1776	3312.62	1776	3784.95	1776	2556.76	1776	17569	1776	13535.8	1776	7302.64	1776	5999.65
1777	4622.06	1777	3113.2	1777	2924.36	1777	1541.7	1777	14600.7	1777	12829.6	1777	6512.8	1777	5558.77
1778	3797.64	1778	3014.35	1778	3420.51	1778	2130.46	1778	13046.2	1778	10447.3	1778	5034.71	1778	5816.15
1779	3917.57	1779	3145.8	1779	3261.07	1779	2315.89	1779	13571.1	1779	11361.7	1779	3176.66	1779	4640.94
1780	5444.75	1780	3439.95	1780	2329.76	1780	1331.23	1780	13171	1780	10575	1780	3190.96	1780	4862.72
1781	8060.77	1781	4044.32	1781	2895.64	1781	1794.7	1781	12674.2	1781	10038.1	1781	3736.66	1781	4272.19
1782	7657.74	1782	4269.02	1782	3005.42	1782	1737.8	1782	13019.2	1782	10762.1	1782	5500.27	1782	4422.02
1783	9927.61	1783	5752.75	1783	3773.83	1783	2099.35	1783	13385.9	1783	10351.2	1783	7683.21	1783	5299.25
1784	10762.1	1784	7765.68	1784	5195.81	1784	3028.21	1784	13639.7	1784	10965	1784	8910.89	1784	7533.1
1785	9481.93	1785	6678.52	1785	4704.16	1785	3079.48	1785	13187.6	1785	10656.8	1785	7173.79	1785	6593.24
1786	9966.79	1786	7407.05	1786	5439.11	1786	3974.09	1786	14165.9	1786	12585.5	1786	5282.25	1786	4526.44
1787	8698.2	1787	6070.84	1787	6001.15	1787	3919.99	1787	14800.5	1787	13430	1787	4864.95	1787	2456.06
1788	9873.23	1788	6660.94	1788	5846.29	1788	4395.38	1788	14269.7	1788	13549.9	1788	6193.97	1788	1506.17
1789	9284.77	1789	5381.16	1789	5773.35	1789	4122.28	1789	14600	1789	13065.1	1789	9108.89	1789	2170.6
1790	10287.7	1790	6087.94	1790	5621.62	1790	4082.27	1790	14043	1790	12467.8	1790	9328.51	1790	2404.27
1791	8778.67	1791	5137.09	1791	6780.21	1791	4696.6	1791	12872	1791	11712.8	1791	6756.45	1791	1822.26
1792	12100.9	1792	7641.44	1792	8266.59	1792	5048.33	1792	10980.9	1792	9902.54	1792	5295.07	1792	1993.25
1793	10706.7	1793	6806.79	1793	5175.27	1793	3554.51	1793	9771.38	1793	9047.46	1793	4612.02	1793	2729.67
1794	10094.5	1794	6075.98	1794	5509.96	1794	4296.76	1794	8904.72	1794	8487.66	1794	7108.99	1794	6672.22
1795	11316.9	1795	7468.12	1795	5387.11	1795	3588.41	1795	9145.36	1795	8452.4	1795	7127.28	1795	6332.76
1796	11438.3	1796	8043.22	1796	5200.73	1796	3925.11	1796	9013.49	1796	8202.9	1796	8764.57	1796	8369.65
1797	11708.6	1797	9142.71	1797	5713.31	1797	4339.7	1797	9345.77	1797	8378.07	1797	8219.24	1797	8360.71
1798	10864.9	1798	8666.97	1798	6514.22	1798	5083.48	1798	9817.43	1798	8754.35	1798	7096.15	1798	7987.24
1799	9750.65	1799	7550.55	1799	6794.58	1799	5089.99	1799	9794.82	1799	8648.46	1799	5878.02	1799	7801.9
1800	9333.74	1800	6359.46	1800	7011.24	1800	5073.5	1800	10522.1	1800	9614.48	1800	6964.31	1800	9272.58
1801	8691.77	1801	5336.67	1801	6359.15	1801	4784.27	1801	11916.7	1801	11321.7	1801	7413.45	1801	9884.74
1802	8178.92	1802	5054.71	1802	6110.57	1802	4731.53	1802	10644.9	1802	9354.08	1802	7317.91	1802	9740.14
1803	7796.76	1803	4973.91	1803	5356.62	1803	3820.33	1803	12118.7	1803	10576.6	1803	6392.47	1803	8790.51
1804	8067.59	1804	4930.9	1804	3901.03	1804	2342.88	1804	9517.02	1804	8613.02	1804	6622.68	1804	8934.62
1805	7946.15	1805	4802.05	1805	1795.35	1805	643.483	1805	8725.77	1805	7139.58	1805	7234.62	1805	8445.22
1806	7691.38	1806	4972.88	1806	1247.59	1806	505.807	1806	8042.14	1806	5335.14	1806	6981.02	1806	6959.5
1807	7216.63	1807	4880.65	1807	1155.06	1807	472.512	1807	7197.08	1807	5506.41	1807	7189.99	1807	5344.67
1808	6424.13	1808	4117.79	1808	1207.06	1808	266.304	1808	5990.64	1808	3496.91	1808	6738.12	1808	5099.31
1809	5567.66	1809	3507.25	1809	1030.7	1809	410.191	1809	5586.54	1809	2705.45	1809	5961.94	1809	7155.3
1810	5220.34	1810	3213.4	1810	1272.04	1810	812.41	1810	6336.47	1810	2993.39	1810	6411.23	1810	8017.6
1811	4905.43	1811	3014.84	1811	1172.26	1811	902.393	1811	7112.53	1811	3693.89	1811	7476.94	1811	7319.72
1812	4965.44	1812	2868.77	1812	1724.62	1812	1359.13	1812	7200.56	1812	4319.24	1812	6302.72	1812	6115.99
1813	4300.52	1813	2596.05	1813	2446.65	1813	1972.65	1813	7553.32	1813	4733.07	1813	6374.6	1813	7752.04
1814	3854.77	1814	2456.31	1814	3958.14	1814	3249.91	1814	7583.24	1814	4978.26	1814	7314.66	1814	7836.35
1815	3748.82	1815	2461.74	1815	5681.5	1815	4780.02	1815	7871.67	1815	4246.13	1815	7306.83	1815	7679.08
1816	3753.98	1816	2315.22	1816	7398.42	1816	5853.07	1816	7322.75	1816	4581.27	1816	8124.11	1816	5676.31
1817	3920.67	1817	2229.47	1817	8744.86	1817	6300.24	1817	6013.92	1817	4350.78	1817	7051.78	1817	4863.38
1818	4739.14	1818	2743.18	1818	9272.24	1818	5805.48	1818	4669.04	1818	3343.06	1818	11622.3	1818	8474.4
1819	4599.82	1819	3004.84	1819	9688.37	1819	6079.11	1819	5603.73	1819	3670.34	1819	11273.6	1819	9946.26
1820	4968.34	1820	2608.12	1820	9256.28	1820	6231.93	1820	4809.4	1820	3843.73	1820	9231.98	1820	9516.79
1821	6088.51	1821	3667.14	1821	9356.35	1821	6165.05	1821	4549.9	1821	5149.69	1821	6551.11	1821	8579.23
1822	6871.78	1822	4821.48	1822	9807.87	1822	7089.14	1822	4753.62	1822	4972.07	1822	4391.05	1822	6492.33
1823	6640.91	1823	5175.73	1823	9538.92	1823	7187.62	1823	3544.94	1823	4359.02	1823	2317.68	1823	3514.38
1824	6628.02	1824	5210.53	1824	9011.37	1824	6848.23	1824	3523.86	1824	3960.97	1824	1381.39	1824	1873.07
1825	6077.19	1825	4908.72	1825	9588.87	1825	6056.61	1825	3537.96	1825	3616.33	1825	1121.89	1825	1008.99
1826	6925.31	1826	5861.36	1826	11060.6	1826	7399.94	1826	6293.55	1826	5216.62	1826	1086.86	1826	765.851
1827	5777.36	1827	5586.64	1827	12599.2	1827	10429.5	1827	7549.39	1827	5982.59	1827	2150.54	1827	667.188
1828	5422.64	1828	5336.28	1828	10090.4	1828	9596.86	1828	6889.07	1828	5811.34	1828	4679.85	1828	1472.71
1829	5310.92	1829	5169.08	1829	10183.8	1829	9045.72	1829	7983.67	1829	5167.98	1829	2237.11	1829	793.79
1830	5704.71	1830	4615.87	1830	10605.7	1830	8673.43	1830	5777.08	1830	3938.79	1830	6434.08	1830	2671.69
1831	5355.9	1831	4561.11	1831	10488.2	1831	6887.06	1831	6539.67	1831	3618.44	1831	8481.37	1831	6518.08
1832	5053.27	1832	3673.41	1832	9682.23	1832	6034.21	1832	8054.81	1832	4389.27	1832	5755.78	1832	3835.7
1833	5225.88	1833	3718.44	1833	9789.6	1833	6865.1	1833	5899.9	1833	3656.45	1833	6517.58	1833	4645.08
1834	4084.13	1834	2662.32	1834	9219.06	1834	7175.22	1834	5855.24	1834	3304.43	1834	8327.24	1834	5026.16
1835	5360.3	1835	3098.19	1835	8616.23	1835	7283.83	1835	5925.31	1835	3371.12	1835	8631.49	1835	4679.84
1836	6265.56	1836	3100.76	1836	8471.84	1836	7105.98	1836	5655.48	1836	4077.35	1836	7427.66	1836	3770.76
1837	5273.71	1837	3283.36	1837	7242.19	1837	5835.74	1837	4878.29	1837	3540.95	1837	5243.09	1837	2933.59
1838	5790.76	1838	3763.25	1838	7659.2	1838	6003.71	1838	5110.87	1838	3142.57	1838	4341.64	1838	3386.01
1839	6342.01	1839	3997.35	1839	7065.24	1839	4675.71	1839	5114.64	1839	4626.88	1839	4010.78	1839	3759.05
1840	6550.25	1840	5316.8	1840	7197.76	1840	4102.36	1840	5667.67	1840	5457.17	1840	3527.77	1840	5159.27
1841	5730.9	1841	5065.04	1841	8935.26	1841	5581.94	1841	6343.74	1841	5189.26	1841	4367.53	1841	6114.36
1842	5636.48	1842	4830.96	1842	11088.9	1842	7796.88	1842	6549.87	1842	5952.52	1842	5660.17	1842	5630.15
1843	5382.85	1843	4785.43	1843	11408.1	1843	8394.66	1843	6562.73	1843	5518.44	1843	6299.58	1843	5772.17
1844	5543.02	1844	5173.25	1844	9552.23	1844	6858.97	1844	6781.53	1844	5578.8	1844	6031.04	1844	5697.19
1845	5265.44	1845	4482.28	1845	8228.83	1845	5520.31	1845	6245.64	1845	5639.85	1845	6333.12	1845	6731.96
1846	4785.88	1846	4220.56	1846	10125.6	1846	7396.76	1846	6670.53	1846	6289.99	1846	9844.9	1846	9247.99
1847	4594.29	1847	3888.18	1847	9727.96	1847	6062.97	1847	7632.75	1847	7177.55	1847	10870.5	1847	8681.96
1848	4145.95	1848	3224.71	1848	7916.58	1848	4821.84	1848	7937.52	1848	7212.91	1848	10080.2	1848	6131.35
1849	3926.3	1849	2882.72	1849	5701.03	1849	3562.42	1849	8472.25	1849	7327.01	1849	7834.83	1849	3797.91
1850	3166.19	1850	2584.07	1850	5972.91	1850	4392.09	1850	10233.2	1850	8348.75	1850	6708.18	1850	4221.42
1851	2682.1	1851	2492.54	1851	7706.46	1851	5154.92	1851	8897.1	1851	8482.72	1851	6289.07	1851	4350.7
1852	2478.81	1852	2520.44	1852	8624.73	1852	6469.15	1852	7845.38	1852	8836.29	1852	6389.54	1852	3942.67
1853	4398.44	1853	4200.53	1853	7985.09	1853	6447.42	1853	8137.8	1853	9499.1	1853	6804.07	1853	4982.49
1854	6816.38	1854	6164.57	1854	8090.24	1854	6587.62	1854	9505.18	1854	12081.1	1854	6610.65	1854	4639.02
1855	7368.4	1855	7315.15	1855	7177	1855	5918.8	1855	10206.4	1855	12538.4	1855	6183.32	1855	4972.86
1856	7815.58	1856	7564.47	1856	7532.74	1856	5755.39	1856	9855.45	1856	12125.6	1856	6935.67	1856	5887.42
1857	6716.71	1857	6569.7	1857	8009.18	1857	6175.12	1857	7872.58	1857	9802.25	1857	6646.74	1857	5892.03
1858	5104.87	1858	4950.55	1858	7498.49	1858	4786.49	1858	8198.09	1858	10299.2	1858	6206.1	1858	5476.88
1859	3532.7	1859	3086.02	1859	6063.03	1859	3433.8	1859	7097.78	1859	7516.28	1859	4782.89	1859	3529.51
1860	2173.25	1860	2225.97	1860	4753.64	1860	2666.15	1860	7015.97	1860	7123.89	1860	4230.32	1860	2405.67
1861	2752.57	1861	2551.38	1861	3890.75	1861	2952.25	1861	7166.1	1861	5804.2	1861	2440.3	1861	1634.2
1862	1273	1862	1463.93	1862	3868.54	1862	1897.38	1862	7202.88	1862	5125.92	1862	2582.35	1862	1338.77
1863	1047.98	1863	1245.89	1863	4128.94	1863	2452.29	1863	6793.77	1863	5184.06	1863	1623.57	1863	921.408
1864	1172.58	1864	1172.63	1864	4896	1864	2955.57	1864	6279	1864	5043.25	1864	1693.04	1864	730.02
1865	1352.28	1865	1263.63	1865	4200.32	1865	2325.21	1865	7173.07	1865	5408.76	1865	1370.48	1865	1151.57
1866	1230.89	1866	933.322	1866	5323.62	1866	2964.43	1866	8490.15	1866	5516.18	1866	1814.72	1866	1456.87
1867	1646.97	1867	844.662	1867	5941.49	1867	3641.05	1867	7838.18	1867	5565.97	1867	2916.41	1867	1398.33
1868	1796.93	1868	807.696	1868	6124.52	1868	4310.45	1868	6604.09	1868	6477.89	1868	2869.62	1868	1586.77
1869	2339.67	1869	1348.83	1869	5814.92	1869	4285.44	1869	7315.58	1869	7808.96	1869	2789.08	1869	963.102
1870	3082.92	1870	1562.31	1870	4454.43	1870	4333.94	1870	7379.14	1870	7823.77	1870	3328.37	1870	581.308
1871	3151.91	1871	1966.12	1871	5466.93	1871	4839.19	1871	6952.53	1871	8216.08	1871	3688.86	1871	1682.22
1872	4040.18	1872	2835.54	1872	5805.98	1872	4390.34	1872	7711.81	1872	8344.83	1872	4007.53	1872	1776.34
1873	5333.38	1873	3921.85	1873	7443.14	1873	4427.02	1873	8405.97	1873	8780.52	1873	5415.22	1873	3341.91
1874	6495.69	1874	5431.58	1874	8188.49	1874	5251.8	1874	8941.48	1874	8348.99	1874	6778.32	1874	6097.61
1875	7089.52	1875	6753.07	1875	10733.2	1875	7441.12	1875	8176.42	1875	7097.46	1875	6472.91	1875	6943.18
1876	7010.77	1876	7744.4	1876	12260.8	1876	8807.19	1876	8297.67	1876	7020.24	1876	6781.94	1876	5939.32
1877	7529.02	1877	7771.23	1877	12212.8	1877	7992.93	1877	8607.88	1877	7167.29	1877	9454.72	1877	11919.8
1878	5806.94	1878	5777.92	1878	11705.5	1878	7384.99	1878	8089.96	1878	5465.97	1878	7708.97	1878	12123.4
1879	5176.44	1879	5772.17	1879	10553.9	1879	7406.31	1879	7791.62	1879	5381.84	1879	8789.48	1879	9011.24
1880	4601.19	1880	5332.39	1880	9637.41	1880	7675.53	1880	7124.02	1880	4976.44	1880	9164.07	1880	9149.45
1881	4988.13	1881	5997.69	1881	8995.63	1881	7030.99	1881	7138.66	1881	4816.1	1881	8555.35	1881	9628.78
1882	5007.1	1882	5056.72	1882	9994.34	1882	7301.17	1882	6675.02	1882	4401.36	1882	7144.19	1882	9222.86
1883	4590.81	1883	4145.14	1883	10476.6	1883	7668.12	1883	6852.62	1883	4744.8	1883	8334.67	1883	9449.83
1884	4597.02	1884	4267.04	1884	11390.8	1884	9070.99	1884	8639.82	1884	5078.83	1884	9773.3	1884	10420.6
1885	4746.82	1885	4550	1885	10092.1	1885	8059.38	1885	10248.7	1885	5585.11	1885	9548.04	1885	11079.4
1886	4324.23	1886	4451.32	1886	12353.1	1886	10746.4	1886	10287.8	1886	6160.34	1886	9680.74	1886	10397.1
1887	4420.91	1887	3623.46	1887	10144.7	1887	8362.5	1887	9725.43	1887	5655.66	1887	8557.27	1887	10656
1888	4754.95	1888	2917	1888	12539.2	1888	8746.49	1888	9462.74	1888	6461	1888	8063.49	1888	11401.1
1889	5965.93	1889	3020.6	1889	11657	1889	6942.63	1889	9797.52	1889	7738.36	1889	6750.57	1889	10933
1890	5713.52	1890	2367.28	1890	8352.17	1890	5111.31	1890	9332.65	1890	7137.31	1890	6670.69	1890	10151.7
1891	6601.27	1891	3065.96	1891	6452.58	1891	4199.8	1891	9609.79	1891	7343.89	1891	7585.68	1891	11567.5
1892	7417.29	1892	4508.18	1892	5515.99	1892	3433.03	1892	10118	1892	8632.84	1892	6270.5	1892	9964.96
1893	7260.68	1893	4910.19	1893	5362.58	1893	3785.53	1893	12264.1	1893	8152.03	1893	4348.41	1893	7534.1
1894	8798.26	1894	6646.56	1894	5706.11	1894	4999.41	1894	11624.3	1894	8401.73	1894	4239.78	1894	7221.09
1895	8494.82	1895	5322.07	1895	7180.68	1895	6852.4	1895	9459.6	1895	7763.8	1895	6547.41	1895	9992.35
1896	8881.32	1896	5455.65	1896	7995.09	1896	6618.53	1896	10377.2	1896	7895.4	1896	4657.29	1896	6275.76
1897	9759.85	1897	6273.44	1897	6340.21	1897	4789.19	1897	9439.98	1897	7425.22	1897	4909.82	1897	5500.53
1898	11389.7	1898	8246.22	1898	6484.36	1898	5128.34	1898	8440.88	1898	7871.87	1898	7380.79	1898	8610.17
1899	12155	1899	10313.2	1899	7209.83	1899	5866.45	1899	8388.7	1899	6869.69	1899	5251.18	1899	6898.18
1900	11362.5	1900	9256.6	1900	6164.55	1900	6680.82	1900	7997.58	1900	6932.06	1900	5695.17	1900	8494.4
1901	7450.01	1901	5167.23	1901	4687.42	1901	6130.5	1901	7702.05	1901	6627.54	1901	6238.99	1901	9089.32
1902	4155.06	1902	2767.92	1902	6339.12	1902	7229.11	1902	7546.74	1902	7274.52	1902	5294.2	1902	8266.08
1903	4048.43	1903	2550.41	1903	7412.06	1903	8029.98	1903	7905.23	1903	6359.38	1903	7568.45	1903	11277.7
1904	3108.47	1904	1781.17	1904	6142.43	1904	5806.47	1904	7078.12	1904	5291.3	1904	6532.69	1904	9685.97
1905	2480.66	1905	1480.46	1905	6217.66	1905	5506.95	1905	8114.32	1905	6999.57	1905	8400.58	1905	11064.6
1906	2598.8	1906	1846.11	1906	6100.76	1906	5271.69	1906	9271.23	1906	8711.72	1906	7221.47	1906	9177.05
1907	3284.87	1907	2516.68	1907	5975.71	1907	5000.1	1907	7517.7	1907	7303.49	1907	5865.08	1907	6941.3
1908	4484.05	1908	3913.72	1908	6337.87	1908	4924.55	1908	6559.23	1908	6276.07	1908	6317.41	1908	7432.19
1909	6170.64	1909	5716.61	1909	6999.37	1909	5549.62	1909	5521.28	1909	5851.28	1909	5769.92	1909	5575.28
1910	7608.65	1910	6721.77	1910	7716.39	1910	6448.4	1910	6687	1910	7447.76	1910	7240.26	1910	6634.01
1911	7474.12	1911	6051.79	1911	7852.72	1911	6934.39	1911	8540.93	1911	7928.88	1911	6495.21	1911	6003.43
1912	7896.42	1912	6353.88	1912	6948.51	1912	5689.48	1912	7915.69	1912	8056.42	1912	4113.85	1912	5405.3
1913	8645.09	1913	7098.44	1913	7019.09	1913	5593.09	1913	8072.02	1913	7643.63	1913	5686.57	1913	6289.26
1914	9191.77	1914	8270.06	1914	7753.58	1914	6049.31	1914	8560.82	1914	7526.01	1914	3884.3	1914	4525.84
1915	10490.4	1915	10029.9	1915	8451.41	1915	6395.08	1915	8570.46	1915	6080.58	1915	4896.6	1915	5870.66
1916	11308.1	1916	10356.6	1916	6517.09	1916	5622.42	1916	6855.13	1916	5072.12	1916	4144.53	1916	4546.56
1917	11397	1917	10890.7	1917	5963.2	1917	4785.26	1917	7040.33	1917	6188.53	1917	4869.3	1917	6994.72
1918	9919.95	1918	10077.8	1918	5944.51	1918	4979.21	1918	6974.41	1918	6733.66	1918	4398.56	1918	6479.67
1919	7231.36	1919	7380.99	1919	6502.9	1919	5777.17	1919	8506.79	1919	7171.3	1919	4958.97	1919	7905.14
1920	7203.37	1920	6493.06	1920	8876.88	1920	7740.08	1920	10412	1920	8545.59	1920	4697.64	1920	6541.87
1921	6223.52	1921	5290.23	1921	10125.2	1921	8729.63	1921	12300.7	1921	9718.18	1921	5028.02	1921	7020.22
1922	5371.19	1922	4121.67	1922	9667.65	1922	8285.84	1922	15437.4	1922	11076.4	1922	4225.24	1922	5797.98
1923	4386.8	1923	3230.21	1923	8601.31	1923	7589.32	1923	16523.5	1923	10434.9	1923	3256.13	1923	4114.99
1924	3816.05	1924	2977.72	1924	7229.5	1924	5047.28	1924	15310.6	1924	10377.4	1924	4404.16	1924	4501.27
1925	3065.99	1925	1894.31	1925	6027.26	1925	3692.57	1925	15573	1925	10215.9	1925	4083.31	1925	4436.55
1926	3403.82	1926	2221.33	1926	5797.69	1926	3406.11	1926	14028.5	1926	8124.12	1926	4168.64	1926	6358.51
1927	3927.26	1927	3086.93	1927	5857.12	1927	3051.48	1927	13687.2	1927	7938.22	1927	3474.98	1927	4783.95
1928	3670.93	1928	3450.27	1928	6324.54	1928	3293.23	1928	13409.2	1928	9031.66	1928	3586.94	1928	5131.64
1929	4411.77	1929	4727.27	1929	6668.07	1929	3937.39	1929	13373	1929	9388.84	1929	2817.07	1929	3508.78
1930	4287.64	1930	4137.75	1930	6457.84	1930	4130.62	1930	12214.6	1930	10593.1	1930	4159.27	1930	6335.28
1931	4478.63	1931	4650.99	1931	6079.27	1931	4140.2	1931	9019.76	1931	7509.96	1931	3206.93	1931	4503.21
1932	4585.23	1932	4637.31	1932	5938.95	1932	4308.32	1932	8568.11	1932	7913.14	1932	2975.36	1932	5411.04
1933	7322.49	1933	5928.33	1933	6088.2	1933	4549.93	1933	8574.3	1933	7328.94	1933	4722.21	1933	7669.15
1934	8086.09	1934	6185.94	1934	5612.22	1934	4442.55	1934	10524.2	1934	9439.17	1934	3643.39	1934	6317.32
1935	8552.22	1935	6167.41	1935	4136.07	1935	2749.42	1935	11399.4	1935	12629.5	1935	5173.3	1935	7414.59
1936	8786.68	1936	6493.59	1936	3979.78	1936	3031.66	1936	10141.9	1936	11883.9	1936	5323.78	1936	7691.29
1937	9967.25	1937	7550.28	1937	4362.03	1937	2732.97	1937	8921.11	1937	8410.16	1937	6561.88	1937	7623.72
1938	10338.1	1938	7271.25	1938	4914.29	1938	2688.32	1938	8859.32	1938	7251.82	1938	5907.8	1938	7436.79
1939	8848.38	1939	5838.36	1939	5837.71	1939	3975.44	1939	9331.83	1939	7702.54	1939	4980.45	1939	6922.98
1940	11962.5	1940	9039.65	1940	8700.37	1940	6517.41	1940	7643.89	1940	7791.11	1940	3823.15	1940	5314.69
1941	9328.03	1941	7151.62	1941	9679.3	1941	7686.94	1941	8179.48	1941	6700.33	1941	3481.34	1941	3829.21
1942	9055.25	1942	7739.75	1942	10195.9	1942	8257.37	1942	7671.38	1942	6468.62	1942	3880.59	1942	4092.62
1943	11785.4	1943	10231.8	1943	10426.1	1943	8545.99	1943	7328.69	1943	7057.69	1943	3152.78	1943	4280.77
1944	11710.1	1944	10253.4	1944	9752.95	1944	7044.46	1944	5275.23	1944	5395.86	1944	3608.88	1944	4097.6
1945	10315.6	1945	9796.91	1945	9442.7	1945	6932.71	1945	3991.67	1945	4281.85	1945	6528.32	1945	5786.51
1946	9271.52	1946	9136.42	1946	9776.47	1946	7843.46	1946	4912.12	1946	5148.37	1946	7617.2	1946	5965.76
1947	8506.09	1947	7866.05	1947	9315.69	1947	6303.38	1947	6890.46	1947	5426.68	1947	9703.42	1947	9222.58
1948	8979.36	1948	9053.09	1948	9889.52	1948	6039.83	1948	7443.94	1948	7122.6	1948	8590.04	1948	9491.34
1949	7965.14	1949	8793.43	1949	10277.1	1949	6982.59	1949	8219.81	1949	7448.04	1949	8573.18	1949	8823.3
1950	7916.9	1950	7956.24	1950	10181.6	1950	7230.1	1950	8793.69	1950	7139.01	1950	7538.19	1950	8814.86
1951	8217.18	1951	8391.1	1951	8100.81	1951	6133.21	1951	8504.33	1951	7990.44	1951	6574.36	1951	8515.7
1952	9170.48	1952	8782.81	1952	7933.81	1952	5110.29	1952	8126.93	1952	7005.31	1952	5296.96	1952	8243.36
1953	8620.21	1953	6672.68	1953	8492.4	1953	5620.73	1953	6755.96	1953	5002.98	1953	4377.63	1953	6405.25
1954	9121.78	1954	7823.23	1954	10071.2	1954	7045.86	1954	5853.4	1954	4749.87	1954	4335.85	1954	5607.21
1955	8879.97	1955	7265.94	1955	14520.4	1955	10902.8	1955	5612.83	1955	3300.07	1955	3262.75	1955	5118.67
1956	9678.26	1956	8335.1	1956	16335.9	1956	13477.4	1956	6413.63	1956	4028.56	1956	3870.48	1956	5395.49
1957	6491.11	1957	6017.22	1957	16104.4	1957	13248.8	1957	7229.6	1957	4457.22	1957	3950.07	1957	4947.56
1958	3010.4	1958	3002.1	1958	14011.2	1958	12260.6	1958	9770.33	1958	4726.47	1958	5109.82	1958	5633.15
1959	3168.69	1959	2778.62	1959	13296	1959	10628.5	1959	10959.6	1959	5211.58	1959	5711.05	1959	5656.77
1960	5196.57	1960	4989.76	1960	13342.7	1960	10148.3	1960	10687.5	1960	4975.52	1960	5483.82	1960	5954.49
1961	5528.2	1961	4810.73	1961	13161	1961	11569.4	1961	10021.9	1961	5004.99	1961	7159.72	1961	7294.06
1962	6141.95	1962	4788.48	1962	9349.49	1962	11135.2	1962	8950.25	1962	5375.64	1962	6837.9	1962	7919.33
1963	7303.18	1963	5594.16	1963	9876.62	1963	10599.3	1963	9366.97	1963	7398.37	1963	7770.89	1963	10604.8
1964	7728.87	1964	4499.1	1964	10379.1	1964	9770.52	1964	9165.73	1964	7243.32	1964	6749.58	1964	10310
1965	8500.46	1965	5094.77	1965	9194.46	1965	8460.41	1965	9394.85	1965	7009.58	1965	6499.13	1965	10033
1966	6708.43	1966	4851.59	1966	8649.13	1966	8306.28	1966	7881.93	1966	5922.17	1966	5079.23	1966	8215.39
1967	5781.48	1967	4405.64	1967	10824.6	1967	8859.02	1967	8193.65	1967	6658.18	1967	4174.37	1967	6710.46
1968	6747.33	1968	6464.78	1968	11264.3	1968	9884.55	1968	9498.81	1968	6877.95	1968	2745.92	1968	4945.97
1969	7981.95	1969	7027.57	1969	14110.9	1969	11344.3	1969	8894.96	1969	7421	1969	2922.29	1969	3845.11
1970	6988.96	1970	5271.12	1970	13980.4	1970	12159.5	1970	8206.11	1970	7708.13	1970	2490.95	1970	4087.09
1971	5233.8	1971	3524.34	1971	13377.2	1971	9945.43	1971	7837.81	1971	6142.65	1971	3033.11	1971	4661.58
1972	4009.89	1972	3840.38	1972	10890.8	1972	7530.48	1972	6165.65	1972	5147.14	1972	2782.53	1972	4234.93
1973	3905.83	1973	4066.02	1973	9372.86	1973	6396.48	1973	5396.36	1973	4653.17	1973	2546.67	1973	3229.91
1974	3727.79	1974	3574.54	1974	9227.87	1974	6204.49	1974	4600.98	1974	3579.14	1974	3259.71	1974	3329.35
1975	3665.37	1975	3302.56	1975	9371.64	1975	6003.31	1975	5125.46	1975	3804.55	1975	2941.84	1975	2401.36
1976	3803.56	1976	4008.29	1976	9036.34	1976	5066.74	1976	5592.94	1976	4365.79	1976	3635.96	1976	2921.95
1977	5411.09	1977	5755.61	1977	9352.55	1977	5393.06	1977	5000.55	1977	3064.27	1977	3060.27	1977	3224.03
1978	5773.27	1978	6752.37	1978	10269.2	1978	6289.17	1978	4521.66	1978	3260.67	1978	2823.3	1978	3152.55
1979	5500.93	1979	5940.94	1979	10753.9	1979	6403.68	1979	5496.64	1979	3121.55	1979	3155.68	1979	3815.71
1980	5376.28	1980	5268.82	1980	9609.9	1980	7251.83	1980	7806.39	1980	3366.03	1980	3868.51	1980	4850.85
1981	6309.89	1981	5733.84	1981	9031.07	1981	7260.57	1981	9740.03	1981	4253.45	1981	5276.08	1981	5656.71
1982	6620.61	1982	5721.61	1982	10080.2	1982	7290.33	1982	10702.8	1982	5257.66	1982	4487.7	1982	4584.26
1983	6912.83	1983	6067.35	1983	10965.8	1983	6550.45	1983	12021.5	1983	6219.49	1983	6093.41	1983	4947.78
1984	6918.59	1984	6404.3	1984	10143.2	1984	5860.54	1984	10751.6	1984	6619.17	1984	6037.73	1984	4497.29
1985	6480.66	1985	6260.06	1985	8605.72	1985	5121.92	1985	9139.67	1985	6478.11	1985	4929.93	1985	4578.92
1986	6592.41	1986	6267.17	1986	7672.36	1986	5397.04	1986	8465.96	1986	6006.04	1986	4773.61	1986	5128.18
1987	6430.98	1987	5999.64	1987	6903.42	1987	5017.89	1987	6457.64	1987	5455.24	1987	3782.3	1987	4410.66
1988	5775.93	1988	5390.25	1988	7446.29	1988	6280.97	1988	5189.43	1988	5020.16	1988	3515.38	1988	4675.57
1989	5915.79	1989	5449.99	1989	7156.22	1989	5906.72	1989	5366.79	1989	5034.09	1989	2919.35	1989	5341.26
1990	7306.46	1990	6362.42	1990	5749.02	1990	4035.81	1990	4271.29	1990	4075.42	1990	2921.96	1990	6398.64
1991	8759.79	1991	7402.86	1991	5012.68	1991	2720.83	1991	4496.52	1991	3068.63	1991	3473.85	1991	6690.76
1992	9142.7	1992	7266.92	1992	4743.7	1992	3124.44	1992	4614.43	1992	2848.77	1992	4223.52	1992	6484.8
1993	10147.3	1993	7567.55	1993	4401.26	1993	2847.81	1993	5107.79	1993	3981.89	1993	4754.1	1993	6287.44
1994	10270.1	1994	6832.05	1994	4594.68	1994	3931.43	1994	4844.25	1994	4069.23	1994	4580.07	1994	5550.29
1995	12698.4	1995	9402.04	1995	4965.16	1995	4698.85	1995	5291.23	1995	4447.9	1995	3997.29	1995	6360.53
1996	15560.3	1996	11814	1996	5333.51	1996	4826.87	1996	7077.12	1996	5432.83	1996	4426.63	1996	6067.39
[truncated: 6,004 more rows]

## Sheet: WT-K140E
																Figure 5d
K140E-GFP		WT-RFP		K140E-GFP		WT-RFP		K140E-GFP		WT-RFP		K140E-GFP		WT-RFP
Pixel	Intensity	Pixel	Intensity	Pixel	Intensity	Pixel	Intensity	Pixel	Intensity	Pixel	Intensity	Pixel	Intensity	Pixel	Intensity
0	8367.17	0	4763.17	0	8094.66	0	5705.89	0	4953.6	0	3579.15	0	5362.33	0	4504.33
1	9188.51	1	4964.28	1	10470.7	1	6718.96	1	5243.75	1	4093.93	1	6848.26	1	5231.08
2	9275.02	2	5581.98	2	9699.48	2	4155.02	2	6148.98	2	4499.85	2	6238.98	2	4472.74
3	9752.51	3	6047.84	3	9628.19	3	4189.45	3	6489	3	5068.85	3	5388.77	3	3325.16
4	9650.51	4	5655.48	4	8430.9	4	3680.15	4	6411.07	4	4956.76	4	4538.39	4	2162.46
5	9735.75	5	5436.79	5	9525.18	5	3586.54	5	6012.61	5	4083.14	5	4303.44	5	2035.12
6	10256	6	5434.37	6	4675.73	6	1260.02	6	6030.6	6	4166.02	6	4260.77	6	2531.04
7	10004.5	7	5566.9	7	1309.36	7	1675.94	7	5220.01	7	3607.2	7	4812.66	7	2377.87
8	9892.01	8	5537.75	8	2320.47	8	1741.37	8	4561.45	8	2935.7	8	3843.62	8	1691.72
9	10587.3	9	5507.65	9	2651.61	9	2059.33	9	4475.44	9	2753.89	9	3936.75	9	2349.84
10	9642.25	10	5440.16	10	3428.85	10	2554.74	10	3331.91	10	1916.39	10	3181.48	10	2267.24
11	9294.08	11	5599.23	11	5269.43	11	4175.05	11	2737.97	11	1657.61	11	3178.33	11	2817.17
12	8399.54	12	5890.89	12	7742.7	12	5858.3	12	2206.6	12	1364.89	12	3596.1	12	3252.2
13	8253.29	13	5430.3	13	8622.24	13	6685.96	13	1556.12	13	1342.38	13	3071.02	13	2543.41
14	7212.65	14	4425.94	14	7361.16	14	5534.22	14	1678.52	14	1485.18	14	3745.01	14	3260.65
15	7187.21	15	4710.46	15	7269.72	15	5681.89	15	1559.42	15	1300.24	15	3321.09	15	2613.84
16	6965.22	16	4632.73	16	7626.7	16	5432.51	16	1760.89	16	2091.36	16	4131.06	16	3690.24
17	7250.31	17	4453.08	17	8396.66	17	5352.58	17	2773.16	17	2876.64	17	4719.28	17	4071.29
18	8221.54	18	4605.19	18	7760.1	18	4227.21	18	2981.42	18	3047.99	18	4683.85	18	3553.15
19	8620.21	19	5208.94	19	7090.71	19	6015.73	19	3652.07	19	4054.68	19	4636.29	19	3390.76
20	8774.52	20	5586.23	20	7154.02	20	6501.23	20	5628.48	20	4829.55	20	4251.64	20	3551.64
21	9318.35	21	5857.83	21	5491.68	21	4834.04	21	6142.95	21	5472.22	21	3946.95	21	3118.41
22	9682.35	22	5885.61	22	5267.88	22	4129.18	22	6572.13	22	5427.43	22	3344.52	22	2370.27
23	10462.7	23	6200.83	23	5783.4	23	3250.98	23	6306.45	23	5397.38	23	3298.63	23	2405.61
24	11694.7	24	6918.68	24	5986.74	24	2736.25	24	6542.29	24	5455.62	24	3037.97	24	2342.46
25	12587.1	25	7496.19	25	5878.3	25	2473.01	25	5998.34	25	4910.94	25	3170	25	2458.21
[truncated: 7,975 more rows]

## Sheet: K140E-R208A
																Figure 5d
[truncated: 8,003 more rows]
