# Supplementary material for: The cooperative binding of TDP-43 to GU-rich RNA repeats antagonizes TDP-43 aggregation
Source: eLife. 2021 Sep 7;10:e67605. doi: 10.7554/eLife.67605 (PMC8523171; doi:10.7554/eLife.67605)
Supplement: Figure 6—source data 1. [file elife-67605-fig6-data1.xlsx]

## Sheet: Fig. 6a
	WT TDP-43						G146A					Fraction:
GT/TDP-43 molar ratio	0	0.5	1.5	4.5	4.5 + DNAse		0	0.5	1.5	4.5	4.5 + DNAse
Gel 1	105-70	102-70.2	100-79.5	98-82.1	104-77.7		99.9-62	99.9-60	98.6-63	97.7-63.8	97.3-61	P
	75-70.1	81-70.1	93-82	94.5-80	86.5-75		69.5-62	71-63	76.5-63	74.3-63.5	65.1-59	S
Gel 2	104.2-68	99.7-65	89.9-67	85.9-63	86.7-66		99.9-58	99.6-60	95.5-62	93.2-67	93-54.7	P
	72.6-71	76.6-67	81-69.3	83.2-63	62-56		66.5-57	72.8-69	72-59.6	73.5-61	57.3-53.8	S
Gel 3	146-130.2	144-72.6	141.3-123	135-120.7	135.7-117		134-1182	133.5-115	130-112.3	125.5-111	128.5-112.7	P
	133-132	129.6-125	126.5-120	129-116.3	121-116		118-117.5	116-113.8	114.4-111.5	118.6-112.3	112.5-111.7	S
Background values, in green

## Sheet: Fig, 6c
Particle heigth ( nm)
	TDP-43 WT			G146A
GT Repeats alone		GT Repeats			GT Repeats		GT Repeats
			DNAse			DNAse	DNAse
2.57593	8.51058	2.08034	18.5674	12.8111	21.2632	22.3409
3.58099	10.1019	2.63961	18.9649	16.1653	13.1613	26.195
3.6815	11.6933	3.19888	20.0145	16.2481	14.2661	19.0577
3.79205	13.2846	3.75815	20.3326	17.5317	15.5287	19.6763
3.82221	14.876	4.31742	34.4541	17.656	17.6857	19.819
4.91772	16.4673	4.87669	15.468	18.2357	12.6878	19.9617
5.21924	18.0587	5.43596	12.4255	18.4428	13.2665	20.1521
5.25944	19.65	5.99523	12.5777	19.1881	13.3191	20.2948
5.4705	21.2414	6.5545	14.5552	20.4304	13.477	20.5803
5.63131	22.8327	7.11377	14.6313	22.0453	13.6348	22.3885
5.76197	24.424	7.67304	15.2398	24.7783	13.74	23.0546
6.2846	26.0154	8.23231	18.7386	27.0144	13.9505	23.6256
6.50571	27.6067	8.79158	22.4656	27.3043	14.1609	23.9587
7.64142	29.1981	9.35085	50.7602	27.7184	14.6344	24.1014
1.993	30.7894	9.91012	88.4103	28.1325	14.95	24.149
2.0332	32.3808	10.4694	10.7946	28.5466	15.0552	24.4821
2.25432	33.9721	11.0287	17.3834	28.8778	15.2131	24.5772
2.37492	35.5635	11.5879	17.672	30.5756	15.2657	25.9571
2.39502	37.1548	12.1472	20.4615	31.1139	16.0022	26.1475
2.71664	38.7462	12.7065	32.6292	36.083	16.0548	26.433
3.04831	40.3375	13.2657	58.8404	40.2654	16.3705	26.8612
3.06841	41.9288	13.825	14.6329	43.9922	16.4757	27.5273
3.10862	43.5202	14.3843	4.2983	54.1788	16.5283	27.7177
3.12872	45.1115	14.9435	15.804	10.7028	16.5809	27.8129
3.14882	46.7029	15.5028	17.1424	11.3612	16.9492	28.6693
3.23927	48.2942	16.0621	11.9941	11.6904	17.107	29.4782
3.25937	49.8856	16.6213	17.013	11.8314	17.3175	30.6202
3.27948	51.4769	6.35813	18.0168	12.2076	17.4227	31.6194
3.29958	53.0683	7.25267	49.4691	12.6779	17.6331	32.809
3.30963	10.2574	5.4636	170.259	14.3708	17.7383	55.5534
3.35988	11.7812	8.1472	10.3468	14.4649	18.1066	57.4091
3.47044	13.3049	9.04173	11.6034	14.7	18.7379	66.307
3.6212	14.8287	9.93626	14.0641	15.2173	18.8431	66.5925
3.63124	16.3524	4.56907	15.1636	15.5465	18.8957	NaN
3.85236	17.8762	10.8308	15.8966	17.7096	18.9484	NaN
3.92271	19.3999	11.7253	16.9438	17.9918	19.6849	NaN
3.95286	20.9237	3.67454	19.2998	21.9419	20.0531	NaN
3.97296	22.4474	12.6199	23.6454	26.8796	20.3688	NaN
4.03327	23.9712	13.5144	33.0172	27.7261	20.4214	NaN
4.05337	25.4949	14.4089	62.651	28.2904	20.5792	NaN
4.06342	27.0187	2.78001	NaN	32.7578	20.6319	NaN
4.11367	28.5424	15.3035	NaN	38.1658	20.7897	NaN
4.12372	30.0661	6.6047	NaN	41.0343	20.8949	NaN
4.14382	31.5899	7.40142	NaN	51.9913	21.0527	NaN
4.17398	33.1136	8.19815	NaN	57.6814	21.4736	NaN
4.19408	34.6374	5.80797	NaN	NaN	21.6314	NaN
4.23428	36.1611	8.99488	NaN	NaN	21.8419	NaN
4.38504	37.6849	9.79161	NaN	NaN	21.9471	NaN
4.50565	39.2086	10.5883	NaN	NaN	21.9997	NaN
4.5559	40.7324	5.01124	NaN	NaN	23.4728	NaN
4.576	42.2561	11.3851	NaN	NaN	24.5776	NaN
4.6162	43.7799	12.1818	NaN	NaN	24.9458	NaN
4.6564	45.3036	12.9785	NaN	NaN	25.6823	NaN
4.68656	46.8274	4.21451	NaN	NaN	25.735	NaN
4.71671	48.3511	13.7753	NaN	NaN	25.998	NaN
4.77701	49.8749	14.572	NaN	NaN	27.0502	NaN
4.82726	51.3986	15.3687	NaN	NaN	27.208	NaN
4.86747	52.9224	18.5556	NaN	NaN	27.6289	NaN
4.88757	NaN	17.7589	NaN	NaN	27.1502	NaN
4.95792	NaN	16.9622	NaN	NaN	32.5216	NaN
4.96797	NaN	3.41778	NaN	NaN	33.5738	NaN
4.98807	NaN	16.1654	NaN	NaN	34.0472	NaN
5.07853	NaN	19.3524	NaN	NaN	38.256	NaN
5.08858	NaN	26.5229	NaN	NaN	40.8865	NaN
5.10868	NaN	20.1491	NaN	NaN	41.4652	NaN
5.12878	NaN	20.9458	NaN	NaN	41.623	NaN
5.14888	NaN	23.336	NaN	NaN	45.3583	NaN
5.18908	NaN	25.7262	NaN	NaN	50.9875	NaN
5.26949	NaN	NaN	NaN	NaN	65.2446	NaN
5.29964	NaN	NaN	NaN	NaN	NaN	NaN
5.30969	NaN	NaN	NaN	NaN	NaN	NaN
5.42025	NaN	NaN	NaN	NaN	NaN	NaN
5.44035	NaN	NaN	NaN	NaN	NaN	NaN
5.48055	NaN	NaN	NaN	NaN	NaN	NaN
5.4906	NaN	NaN	NaN	NaN	NaN	NaN
5.5107	NaN	NaN	NaN	NaN	NaN	NaN
5.52075	NaN	NaN	NaN	NaN	NaN	NaN
5.57101	NaN	NaN	NaN	NaN	NaN	NaN
5.70166	NaN	NaN	NaN	NaN	NaN	NaN
5.73182	NaN	NaN	NaN	NaN	NaN	NaN
5.75192	NaN	NaN	NaN	NaN	NaN	NaN
5.78207	NaN	NaN	NaN	NaN	NaN	NaN
5.79212	NaN	NaN	NaN	NaN	NaN	NaN
5.80217	NaN	NaN	NaN	NaN	NaN	NaN
5.87252	NaN	NaN	NaN	NaN	NaN	NaN
5.88257	NaN	NaN	NaN	NaN	NaN	NaN
5.93283	NaN	NaN	NaN	NaN	NaN	NaN
5.97303	NaN	NaN	NaN	NaN	NaN	NaN
5.98308	NaN	NaN	NaN	NaN	NaN	NaN
5.99313	NaN	NaN	NaN	NaN	NaN	NaN
6.06348	NaN	NaN	NaN	NaN	NaN	NaN
6.07353	NaN	NaN	NaN	NaN	NaN	NaN
6.10369	NaN	NaN	NaN	NaN	NaN	NaN
6.13384	NaN	NaN	NaN	NaN	NaN	NaN
6.16399	NaN	NaN	NaN	NaN	NaN	NaN
6.17404	NaN	NaN	NaN	NaN	NaN	NaN
6.19414	NaN	NaN	NaN	NaN	NaN	NaN
6.31475	NaN	NaN	NaN	NaN	NaN	NaN
6.3248	NaN	NaN	NaN	NaN	NaN	NaN
6.33485	NaN	NaN	NaN	NaN	NaN	NaN
6.3449	NaN	NaN	NaN	NaN	NaN	NaN
6.35495	NaN	NaN	NaN	NaN	NaN	NaN
6.3851	NaN	NaN	NaN	NaN	NaN	NaN
6.4052	NaN	NaN	NaN	NaN	NaN	NaN
6.46551	NaN	NaN	NaN	NaN	NaN	NaN
6.47556	NaN	NaN	NaN	NaN	NaN	NaN
6.49566	NaN	NaN	NaN	NaN	NaN	NaN
6.54591	NaN	NaN	NaN	NaN	NaN	NaN
6.55596	NaN	NaN	NaN	NaN	NaN	NaN
6.59616	NaN	NaN	NaN	NaN	NaN	NaN
6.74692	NaN	NaN	NaN	NaN	NaN	NaN
6.80723	NaN	NaN	NaN	NaN	NaN	NaN
6.83738	NaN	NaN	NaN	NaN	NaN	NaN
6.86753	NaN	NaN	NaN	NaN	NaN	NaN
6.89768	NaN	NaN	NaN	NaN	NaN	NaN
6.96804	NaN	NaN	NaN	NaN	NaN	NaN
6.97809	NaN	NaN	NaN	NaN	NaN	NaN
6.99819	NaN	NaN	NaN	NaN	NaN	NaN
7.03839	NaN	NaN	NaN	NaN	NaN	NaN
7.04844	NaN	NaN	NaN	NaN	NaN	NaN
7.06854	NaN	NaN	NaN	NaN	NaN	NaN
7.09869	NaN	NaN	NaN	NaN	NaN	NaN
7.11879	NaN	NaN	NaN	NaN	NaN	NaN
7.14895	NaN	NaN	NaN	NaN	NaN	NaN
7.18915	NaN	NaN	NaN	NaN	NaN	NaN
7.2796	NaN	NaN	NaN	NaN	NaN	NaN
7.33991	NaN	NaN	NaN	NaN	NaN	NaN
7.34996	NaN	NaN	NaN	NaN	NaN	NaN
7.42031	NaN	NaN	NaN	NaN	NaN	NaN
7.44041	NaN	NaN	NaN	NaN	NaN	NaN
7.49066	NaN	NaN	NaN	NaN	NaN	NaN
7.52082	NaN	NaN	NaN	NaN	NaN	NaN
7.58112	NaN	NaN	NaN	NaN	NaN	NaN
7.61127	NaN	NaN	NaN	NaN	NaN	NaN
7.66152	NaN	NaN	NaN	NaN	NaN	NaN
7.69168	NaN	NaN	NaN	NaN	NaN	NaN
7.71178	NaN	NaN	NaN	NaN	NaN	NaN
7.72183	NaN	NaN	NaN	NaN	NaN	NaN
7.77208	NaN	NaN	NaN	NaN	NaN	NaN
7.81228	NaN	NaN	NaN	NaN	NaN	NaN
7.85248	NaN	NaN	NaN	NaN	NaN	NaN
8.1138	NaN	NaN	NaN	NaN	NaN	NaN
8.16405	NaN	NaN	NaN	NaN	NaN	NaN
8.1942	NaN	NaN	NaN	NaN	NaN	NaN
8.20425	NaN	NaN	NaN	NaN	NaN	NaN
8.24446	NaN	NaN	NaN	NaN	NaN	NaN
8.31481	NaN	NaN	NaN	NaN	NaN	NaN
8.34496	NaN	NaN	NaN	NaN	NaN	NaN
8.38517	NaN	NaN	NaN	NaN	NaN	NaN
8.40527	NaN	NaN	NaN	NaN	NaN	NaN
8.71683	NaN	NaN	NaN	NaN	NaN	NaN
8.76709	NaN	NaN	NaN	NaN	NaN	NaN
8.82739	NaN	NaN	NaN	NaN	NaN	NaN
8.86759	NaN	NaN	NaN	NaN	NaN	NaN
9.0686	NaN	NaN	NaN	NaN	NaN	NaN
9.15906	NaN	NaN	NaN	NaN	NaN	NaN
9.19926	NaN	NaN	NaN	NaN	NaN	NaN
9.20931	NaN	NaN	NaN	NaN	NaN	NaN
9.35002	NaN	NaN	NaN	NaN	NaN	NaN
9.38017	NaN	NaN	NaN	NaN	NaN	NaN
9.50078	NaN	NaN	NaN	NaN	NaN	NaN
9.75204	NaN	NaN	NaN	NaN	NaN	NaN
9.85255	NaN	NaN	NaN	NaN	NaN	NaN
9.87265	NaN	NaN	NaN	NaN	NaN	NaN
9.8827	NaN	NaN	NaN	NaN	NaN	NaN
9.9028	NaN	NaN	NaN	NaN	NaN	NaN
9.9832	NaN	NaN	NaN	NaN	NaN	NaN
10.0435	NaN	NaN	NaN	NaN	NaN	NaN
10.1139	NaN	NaN	NaN	NaN	NaN	NaN
10.144	NaN	NaN	NaN	NaN	NaN	NaN
10.1641	NaN	NaN	NaN	NaN	NaN	NaN
10.2847	NaN	NaN	NaN	NaN	NaN	NaN
10.2948	NaN	NaN	NaN	NaN	NaN	NaN
10.3953	NaN	NaN	NaN	NaN	NaN	NaN
10.5561	NaN	NaN	NaN	NaN	NaN	NaN
10.6063	NaN	NaN	NaN	NaN	NaN	NaN
10.6264	NaN	NaN	NaN	NaN	NaN	NaN
10.727	NaN	NaN	NaN	NaN	NaN	NaN
10.8275	NaN	NaN	NaN	NaN	NaN	NaN
10.9682	NaN	NaN	NaN	NaN	NaN	NaN
10.9983	NaN	NaN	NaN	NaN	NaN	NaN
11.0486	NaN	NaN	NaN	NaN	NaN	NaN
11.33	NaN	NaN	NaN	NaN	NaN	NaN
11.4807	NaN	NaN	NaN	NaN	NaN	NaN
11.4908	NaN	NaN	NaN	NaN	NaN	NaN
11.7019	NaN	NaN	NaN	NaN	NaN	NaN
12.0335	NaN	NaN	NaN	NaN	NaN	NaN
