# Supplementary material for: The cooperative binding of TDP-43 to GU-rich RNA repeats antagonizes TDP-43 aggregation
Source: eLife. 2021 Sep 7;10:e67605. doi: 10.7554/eLife.67605 (PMC8523171; doi:10.7554/eLife.67605)
Supplement: Figure 7—source data 1. [file elife-67605-fig7-data1.xlsx]

## Sheet: Anti-HA
WT	WT	Q213A	Q213A	G146A	G146A	K140A/T141A	K140A/T141A
	Cycloheximide		Cycloheximide		Cycloheximide		Cycloheximide	Cycloheximide	Figure 7b
19031	18403.2	18797.8	18384.8	29109.6	21953.8	23566.5	49926.9
18809.3	19210.3	23060.7	23556.7	18148.2	34361	22466.5	19402.1
19516.4	18793.9	22734.6	18807.5	18430.8	18165.6	34452.4	20003.9
18082.3	18314.4	20199.4	19928.5	19432.4	34654.5	41539.5	28923.6
24869.2	18021.1	19257.4	22630	25355	38193	22881.3	19348.9
19025.5	18244.8	18560.7	18264	49229.7	42952.4	25180.2	41729.9
19619.9	19263.5	18033	18146.2	20380.5	21295.4	24329.8	22410.1
18587.6	18560.4	20832.4	20154.5	32726.2	25608.2	20364.7	25241.1
22513.7	22358	18749.9	18703	28660.9	24888.7	21963.6	22877
20758.3	32995.1	20786.8	18802.4	29016.3	27936.3	26156.3	21977.2
21101.5	57977	26296	20601.1	23411.6	29180.2	25899	37318.9
20803.8	40025.1	18399.8	19260.4	31166.4	22373.9	31736.7	41507.9
20623.2	20944.7	18941.3	18664.9	36346	24945.3	18060.4	18640.7
18262	19535.8	18892.3	24089.9	23716.4	32624.9	24976	26527.7
19338.4	20071.9	18396.5	18273.7	23660.9	24090.6	19810	21852.2
26518.3	18039.2	24066.6	39053.5	20402.1	26759.9	21803.7	19173.7
24372.7	23271.7	24023.9	22742.6	39024.1	39592.2	22243.5	20724.8
19365.1	23427	19798.3	27503.7	49049.4	35101.5	21417.4	19709.9
20915.6	21250.6	20794.5	18666.1	23426.8	21671.3	22415.7	18915.6
23370	23117.8	27325.7	35916.4	20172.1	35564.3	23522.8	19852.2
25194.9	21691.3	37059.3	27216.2	19403.4	25492.3	46190.9	26001.8
29645.9	18989.9	28740.5	24749.4	18410.8	23376.6	46602.2	18378.3
31260.5	22346.5	34885	19576.3	20092.2	30133.1	43398.2	50650.8
19459.9	21053.5	23067.3	18865.9	24130.9	33745.3	46613.6	48780.3
25615.4	20000.1	19571.4		18844.1	24332	23073.7	18540.1
29192.4	19497.2	25826		27984.1	23027	56136.1	18315.8
21736.2	21411.7	23972.4		21236.8	30555.7	25942.4	18986.7
23095.6		19441.2		24182.2	25905.8	26862.1	22071.4
18784.6		24943.1		30120.9	22300.7	42790.9	25133.1
19756.7		22981.8		51930.2	24274.3	47552.3	19735.6
21052.9		21581.3		20972.1	41013.4	19055.8	18445.8
20854.7		18226.2		38554.5	31097.1	49615.2	19810.2
23827.4		24945.1		47256.3	35535	43193.8	24168.1
46352.5		27328		44005.5	20994.7	44861.6	23032.5
29829.1		20735.5		22766.2	26417	25610.8	21388.8
44181.7		19439.3		21695.7	18325.5	19609.4	27112.1
38134.6		23042.2		33698.2	49448	19097.2	19883.8
20641.4		26757.9		24481.7	36285.6	25635.9	32311
31738.7		20853.1		19805.5	22742.4	19332.1	19219.8
18713.5		20896.2		21924	18190.4	18522.5	19037
27441.3		20384		19873.6	21066.4	35296.6	18841.2
31209.2		19484.6		21765.2	28737.8	18813.8	18146.5
20934.4		18556		27934.6	33856.4	30826.9	46424.7
36173.4		18294.2		30557	34652.1	47768.2	28793.6
21231.9		19661.3		36064.2	21103.7	25683.5	40428.2
19573.3		25625.3		22289.8	28158.8	21684.9	27994.4
29005.2		18616.7		46874.1	44853.4	25873.3	53709.2
28872.5		21435.7		38510.2	25448.5	19245.7	47190.8
18575.6		18172.5		19742.3	25663.7	26424	23264
25168.1		26799		23105.5	19973.5	23459.8	33943.5
23378.6		32523.8		21396.1	20996.4	29670.2	33202.3
18702.1		26217.9		33683.3	31611.6	31159.2	42291.8
21520.1		21312.8		23863	23289.3	28763.8	32156.2
18887.1		20854.2		19934.1	25854	18347.7	38896.4
31265.1		24282.7		29383.1	18990.9	19347.3	19683.8
39172		21419.8		49934	32414.8	32043.6	22546.3
30739.2		30341.1		21542.7	40765.4	34098.6	33693.6
20944.2		18208.8		27385.5	20923.4	28221.6	31389
19117		25614.1		46490.7	37035.2	22865	26727.9
26795.6		33951.2		18047.7	40730.3	19867.8	41984.2
25197.2		27592.5		19483.4	20931.7	31167.2	19431.5
22244.7		19364.1		23337.1	41300.6	35693.2	28713.3
18082		20476.2		33315.8	30459	38013.4	19690.5
18128.8		20096		38481.8	21836.6	19747.4	28889.8
19569.4		19315.5		23221	41633.2	22075	21205.6
19557.6		18113.2		18185.8	20216.7	19255.6	25224.9
34417.1		19220.4		19049.1	52838.5	26951	18243.1
19725.7		25210.9		37876.2	26444.4	20972	32185.2
19305.7		26641.2		37122.2	18472.1	19765.9	21478.1
18818		25995.8		23003.4	19310.2	48194.9	20917.7
24289.6		22274		37005.9	24498.8	29804	27313.3
19678.4		21741		21515.2	24236.6	20092.5	22229.2
19061.3		24335.1		21189.7	47727.6	43504.2	27646.8
32661.4		21042.6		18966.7	40245.9	19749.6	22979.5
24149.8		18292.4		18870.4	37294.3	38491	18906
25349.4		26437.9		48408.3	41504.6	19096.2	20113
20627.8		22382.7		18280.4	34394.7	20765.7	27702.8
21054.5		21503.8		21598.6	27819.9	19299.1	35397
18422.3		20588.8		18184.1	26594	51546.5	22321.8
22886.4		25902.6		20489.7	39200	25333.1	18604.6
19912.6		23422.1		20595.4	35049.1	27120.9	36843
22137.8		31218.1		41515.1	26442.8	27470.1	19623
33510.5		19622.2		21990.5	42599	31106.3	27682.9
27777.8		18964.6		20476.7	44986.8	19879.2	31092.1
18316.5		23431.6		23649.4	30165.8	19385.9	23016.7
23216.2		21944.4		36718	39762.6	31834.7	23512.6
22068.1		20372.1		43578.4	22472.6	23555.6	19418.2
25711.4		18011.1		21846	34178.1	19419.3	18480.8
21377.4		19256		22708.5	41382.3	39221.3	26099.7
18981.1		20019.8		27727.3	48171.1	20453.9	33082
24183.2		24626.8		18070.6	50897.9	24697.6	19662
18395.1		23204.1		28040.8	26840	30385.9	27457.6
24321.3		21762.7		22014.2	25641	22098.3	33018.2
22409.6		26022.4		22200.9	43734.1	25788.6	28282.8
24325.2		26220.9		47418.3	25135.1	21503.6	28287.9
20868.9		24803.7		50687.5	19269	31828	21802.5
19056.2		23506.1		20288.5	26407.1	25040	26672.8
18230.6		20896.8		23231.5	25935.8	41050.5	25592.7
22142.5		25966.9		31498.7	31427.7	20461.7	18915
24055.8		30629.4		25112.2	38168.7	34717.4	19787.3
18520.4		26332.8		35578.4	34320.3	34853.8	21919.7
22588.9		18832.7		18867.4	18388	26226.2	35658.4
28272.8		19853.8		26602.8	26436.1	26357.8	19977.8
20195.8		21662.3		35806.3	25666.6	31789.8	21191.5
19038		22263.1		18883.6	31807.8	26332.2	25225.9
26747.2		20239.6		34370.8	36055.2	38284	28110.4
18616.1		20841		33598.8	36901.5	20579.5	19495.9
18067.7		18605.8		29885.6	24023.8	36789.1	25750.1
22981.4		19697		30281.2	36078	22401.3	18609.4
18102.6		23725		19339.8	22414.7	29354.9	23396
18259.8		20965.2		18990.9	32596.4	31375.1	19690.8
18584.2		18561		19510.2	44976.2	18888.3	29655
21442.2		21011.8		23429.9	32392	33198.5	31331.2
18617.3		18911		24125	21303.4	35083.6	26767.3
24148.8		21309.9		19903.9	52717.8	34833.6	19548.3
22539.8		20592.6		21436	38593.3	26733.7	20527.6
28659.2		20161.1		21440.7	21180	33653.2	20127.7
28520.2		20127.8		29980.2	45019.1	30700.5	19056.9
19005.5		18557.1		31485.7	43657.1	40038.7	28504.4
25736.4		22263.5		22528.8	23269.1	20104.1	21280.5
32211.3		19274.8		23114.1	31710.8	24705.8	20815.9
33293.2		20113.6		27762.1	38733.5	20148	27474.8
24175.8		18588.7		35440.7	18063.9	21690.7	18112.9
19125.4		18810		18340.5	45806.6	21982.4	22601.4
21621		23876		19760.3	18952.2	46380.2	23424.8
31934.8		22006.5		18099	24822.4	22091.9	45020.6
24802.9		20064.3		25697.1	18962.8	22864.1	28668.6
25182.1		27662.5		34948.8	19984.3	19551.4	31391.9
20951.5		20676.8		45639.6	20576.9	24471.7	25528.2
29797.3		22254.5		20026.9	19731.3	21341	21409.5
19797.9		32807.3		40547	36079.3	18347.3	23792.1
27514.2		18248.2		22938.2	27719	23635.7	38585.5
28747.3		18334		18178.2	18833.3	36531.8	24174.2
27172		30241.6		23553.1	34700.6	31547.6	35870.3
18838.3		20218.2		34396.2	29765.9	21833	18369.9
19166.7		23863		23988.4	28342.5	27203.3	30613.1
19788		20228.3		21674	21014.9	23288.9	30285.4
18059.2		19951.9		22218.8	21606	19948.3	22656.6
18796.9		18938.9		23642.8	25800.1	20955.6	21911.7
19037.1		22836.6		21790.3	46742.4	19130.1	30300.9
28158.1		23667.9		20563.3	49964.1	37645.2	32466.8
19809.5		18633.2		26678.2	18331.8	34187.4	18780.1
26495.7		18764.6		29584.6	45518.7	33803	21958.1
26475.5		23396.8		19913.8	33998.3	23320.5	25482.4
25945.4		29403.4		28713.6	45111.6	26560.1	25994.8
19588.5		18740.6		30145.5	31848.5	21230.5	21115.3
21521.7		23779.3		37387.3	35153.2	26016	28851.2
20233.5		22689.7		18241.7	24370.2	21487.4	23784.8
25655.1		22638.2		30995.2	22803.3	29752.6	18704.8
23411.6		21432.8		36678.9	37241.8	20998.6	26164.3
25394.7		26547.1		29618.8	25538.1	49195.9	18209.1
24976.3		21383.6		26650	22062.3	20620	21280.7
26500.5		27388.3		20245.8	32970.2	26261.6	20457.5
36008.3		22934.7		46759.8	30892.3	28638	28600.3
25052.6		26190.8		18398.7	26031.8	20186.8	36281.6
27803.4		24594.1		18289.6	20092.9	20918.3	24123.3
23213.1		26480.5		21731.9	27842.3	44389.5	22035.5
23057.5		23582		23405.8	31841	20530.4	40237.2
21870.9		20091.5		24591.2	21195.4	32923.7	19408.2
28639		21166.5		27277.7	41996.5	19037.5	18830.8
27476		19604.2		38672.8	31929.4	25782.2	22464.1
19938		19986.4		19648.5	19071.5	39607.6	31150.1
26553.7		19374.9		29877.9	20648.3	38646.9	36476.7
19522.2		22117.6		20019.2	27950.4	24208.4	21048.8
19597.8		26409.5		27678.2	25363.5	21667.5	27360.8
18848.5		19936.8		20719.3	35685.4	19853.4	35974
21471.9		18918.7		39133.8	44327.7	19684.6	20646
22737		19444.6		46289.4	36350.3	18638.7	50849.1
23119.2		18538		22808.3	20400.4	23861.7	45804.2
23412.1		18263.8		22203.6	18396.9	18902.7	18422.8
19267.6		19396.9		27541.4	30407.8	25426.2	47691.7
19382.2		21470.5		20860.4	27359.7	18960.2	36516.8
20664.8		23076.7		21064	21210.5	22692.6	22863.7
22225.1		20682.9		24559.3	21673.1	25485.6	20483.1
20127		35365.9		30600.5	20971.9	25828.8	22238.1
20016.4		21908.1		23882.9	29221.2	21464.4	29358
21272.2		23109.7		48913.3	25334.1	27387.5	31570.2
19167.3		25081.7		31610.3	26039.8	18274	28074.1
20655.9		19113.9		46712.4	40105.4	23871.5	33372.8
19537.9		26349.6		18029.7	39531.2	22370.2	29570.5
21698.9		22704.8		26402.3	19936.8	22981.8	20357
21858.9		20659.7		18067.3	30552.2	20874.4	20025.5
18156.6		20128.8		18588.5	25745.7	26217.6	21519.4
20062.4		29737.3		18846.4	35542.8	24576.7	30382.8
19912.4		26760.1		26977.8	26727.8	18456.6	50890.1
22194.7		26907.3		19861.7	43123.7	34324.6	25121.9
23330.6		20979		40825	23749	18067.6	32473.3
19863.2		27109		24458.3	20401	24447.8	20572.5
25337.2		19359.5		45591.2	34129.7	19934.5	30821
23287.5		20239.6		18105.7	27033.9	36092.1	21649.9
21889.9		18917.7		18600.3	26460.2	27997.5	21007.8
18748.1		24646.5		19030.5	25479.5	26888.5	21967.3
33954.5		19275.9		19450.6	22846	34083.9	27221.4
25151.1		23712.1		21725.7	43209.3	30379.9	22181.9
21236.4		25137.7		22607	30103	33838.9	45772.7
27625.8		26497.2		20734.9	24417.9	38126.3	51342.6
18091.5		18547.2		45993.3	40199.5	33940	18350.4
23606.3		23953.7		24864.4	28311.8	23845.2	24812.9
23266.6		18091.9		22205.1	18065.8	20215.4	28318.4
30055.9		18430.8		25965.5	26983.2	43365.2	22183.6
21943.8		22580.2		19891.4	19783.1	34827.1	19788.1
19808.1		19730.8		35579.2	50102.6	34347.3	36853.6
19272.6		24198		24525.3	47846.8	23987.1	22967.2
20695.9		22517.6		21573.5	18696.2	20570.6	18135.2
21777		20748.2		24958.7	48391	20702.9	21336.5
18196.2		28540.9		24554	19160.8	21288.1	23687.9
24334.1		22441		20480.7	23877.7	33116	25831.1
22464.3		18444.4		30412.1	45419.2	19699.1	19373.9
19216.6		18103		41305.3	30385.7	19585.5	22340
19431		24000.9		20094.2	20504.1	21159.6	21567.3
24044.6		22690.3		29608.5	20839.7	24185.7	32019.8
20450.9		36269.1		30607.1	23121.3	27498.4	18632.2
18404.6		25836.6		37526.8	41064.7	21349.7	21316.9
19949.6		19978.3		27550.8	22608.2	23593.3	18292.7
19088.5		19663.2		23461.4	18998.4	37113	24650.8
21612		23242.2		36638.4	33209.2	18113.6	20220.3
20282		28832.2		26420.8	23007.1	22546.4	18965.9
19817.7		18309.6		32273.9	23145.6	18745.6	18246.9
19935.8		32822.5		26965.6	32691.1	43676	30647.6
20210.4		21793.8		25970.2	21629.3	19738.5	39061.1
20553.3		26897.2		20778.9	18806.8	24740.3	39662.4
19345.9		22918.2		33974.9	19816.4	25878.9	23837.4
18630.1		30396.3		20658.3	24618.2	25548.8	32156.3
19976.4		27080		20394.1	32267.7	24880	27939.6
26851.1		18393.4		18444.2	20064.8	18451.1	19521.1
31362.8		21972.4		20241.6	43396	24710.4	22014.4
21168.8		23903.9		32483.9	45203.5	20334.5	20820.6
21830.7		18365.6		20829.4	25979	25413.1	20168
18217.8		21559		18809.9	49934.8	22485.6	21050.5
20597.8		24170.7		20393.7	36909.5	23436.7	19314.9
19586.5		19248.9		26441.8	32240.6	20966.8	35078.1
20143.2		23974.9		22228.1	44043.9	18783.5	38524.9
23440.1		18991.8		28958.9	33956.5	26899.3	18886.6
18441.1		21011		37916.1	28197.9	23309.3	20738.7
23599.3		18923.8		26433.4	21170.4	22703.5	18149.4
18763.1		19107.6		24027.9	29992.1	23469.8	19988.8
23394.6		18595.8		19805.4	34253.1	40466.7	33721.6
19354.9		20517.3		23759.5	24055.9	27758.4	23013.5
27693.7		21364		19668.2	25920.4	19411.8	28245.2
26815.7		18788.3		27200.2	34498.1	26136.7	47030.4
24843.6		19969.9		32699.5	47940.7	29331.8	20448.7
27021.2		22274		31164.5	19861.7	19793.7	29446.9
27320.7		21486.9		18635.3	22428.5	24072.2	30164.8
19942.1		27205.5		29123.9	41375.2	27854.4	43086.8
23658.8		20927.8		20809.8	48363.2	18305.5	54812.3
23061.4		21529.3		23628.4	35427.8	21049.9	21956.5
23674.5		18608.9		18208.3	44780.9	25195.4	27471.8
21803.7		20292.1		26212.7	35191.8	24483.9	32634.3
20376.3		20748.8		40496	27565.2	22721.3	45983.2
18317.2		21167.3		22929.8	40472.5	18743.1	26240.7
19728.7		21578.9		26797	33553.8	30105	26808.9
20607.6		25240.3		40630.1	35963.3	29689.9	18879.3
27291		19612.6		33187.1	40666.5	19432	25276.7
21800.5		23909.5		24142	36783.1	23464.4	18583
26613.8		18831.5		50761	20550.7	22510.9	20130.7
22173.9		21106.6		28397.2	28185.6	22326.8	31951.3
18587		19495.5		40994.9	20171.4	19679	19553.8
19744.4		20282.4		31944.6	38383.5	20106.6	32564.3
25076.9		29897.7		19209	27262.9	20029.2	19246.6
19331.4		23600.1		30623.3	36861.2	38670.8	19679
21396.9		18559.6		25047.9	22850.5	22875.1	38694.8
22707.9		19178.9		21798.9	28818.5	25198.2	22488.7
18815.3		20272.6		26863.7	29741.9	25197	31812.9
25551.3		25118.1		38121.4	26050.2	24104.5	36998.4
22937		20132.4		20006.5	32571.3	20294.9	38473.7
21453		26394.1		27311	20016.9	21619.7	29163.1
25658.6		23039.8		28077.9	28301.4	27560	36269.1
22031.8		19621.7		22339.7	29147.4	36583.9
24738.2		21443.8		34031.3	44338	27252.1
23473.7		30601.8		40039.1	36905.3	43112.5
18293.3		18284.5		34423.1	34160.5	18615.8
20100.5		18429.7		35864.5	25347.7	25614.9
21817.2		27208.4		25789.4	30158.7	20418.7
19138.3		19901.7		39325.8	43311.9	47712.3
24936		21006.1		23768.8	22908	36037.8
18003.7		18444.5		21516.1	25258.5	43804
22933.9		19749		39914.1	27639.4	34729.5
21442.9		19518.8		39537.7	23597.3	53219.7
21940.8		18646		36156.9	18335.9	45023.2
19691.2		18519.7		33748.6	25391.7	54526.4
27710.1		19093		27095.5	32309.2	21828.9
30623.4		19201.2		34163.8	42541.1	24724
27024.9		30175.5		20427.6	25530.9	22906.5
25519.9		24364.7		22743.7	21126.2	23047.9
23469.7		27999.5		55239.7	39056.7	21932.7
23977		27488.9		46241.2	49998.5	21210.3
20154.6		20738.9		40653.2	19251.3	18138
23395.8		18918.4		25735.4	36833.5	23698.3
21954.9		38012.5		21344.3	19751.6	18819
21584.5		25945.6		34927.5	20693.2	19604.4
23803.8		23905.4		47500.8	28296.2	20149.5
24321.2		25578.6		52403.7	51062.3	20317.7
28624.4		23837		34728.5	52890.5	20398.3
24032.1		19978.1		39261.7	42651.5	20630.1
21073.4		26294.9		18905.8	38499.6	20757.7
19921.2		22376.7		43429.4	33966	25716.7
19058.3		25579.8		26247.3	26362.4	29126.9
19333.1		30798.2		26062.5	36628.5	28449.8
18651.2		20484.5		22407.6	19978.4	19102
18453.6		18166.5		18754.9	22453.6	20843.8
24798.2		20943.7		19990.9	24621.7	21182.2
27578.2		18175.2		20602.7	18733.1	21403.3
		20355.1		36325.5	34008.1	43206.4
		21636.7		30497.4	32253.3	35176.8
		19699.9		21134	24514.1	18642.4
		24030.2		21437.5	25278.3	19218.5
		20549.6		18331.5	48265.1	34340.3
		25345.7		40338.4	18197.1	20576.5
		21188.2		23587.7	21389.5	18035.8
		23500.9		31899.3	26389.1	19321.5
		22005		23588.6	31837	22207
		18030.7		38295.4	24671.6	33652.6
		20419.4		27803.2	37913.4	18986.5
		21085.1		21559.9	49534.4	19424.8
		18875.3		19076.7	40003.3	27214
		23331.8		22193.7	29965.6	18454.1
		22714.8		24438.5	19578.6	27971.2
		18516.8		20267.5	36147.9	21707.5
		20949.8		19000.4	31570.2	18977
		19227		24536.9	47152.7	21865.9
		26823.8		35152.1	22014	21698.6
		20209.5		18442.5	19756.7	18595.8
		19703.3		19602.1	21878.8	18513
		23426.1		24492.9	36841.4	19207.6
		20053.6		40164.9	32139.7	24959.7
		26831.3		32815.3	27681	33117.8
		21891.8		18007.6	19015.6	38403.9
		33623		23212.9	21113.1	24645.2
		20542.8		22307.7	25434.8	21119.8
		21442.3		20266.7	24029.1	18720.1
		18150.2		22020.2	20209.6	21615.4
		21680.7		31368.2		20384.1
		22084.1		28790.9		20160.8
		18590.1		28567.6		43925.2
		20899.6		19126.8		48498.6
		25784.4		18566.6		25667.8
		25158		19469.7		33207.6
		23461.7		25125.8		40874.1
		23179.7		21612.1		21050.7
		25726.3		26345.2		19238.3
		20173.9		20860.8		21285.7
		22241.6		26018.9		36934.9
		25095		25882.5		47195.9
		23258.8		27939.2		32014.6
		19287.4		27208.7		27214.9
		18378.4		19686		29644.9
		31832.2		27111.1		20391.5
		27319.5		35249.1		36887.9
		18621.9		27431.3		18004.4
		18158.7		46673.5		46193
		20022.4		20622.8		22525.9
		18386.9		34339		35181.4
		18699.1		20896.5		21112
		18155.3		35536.3		21503.1
		23290.9		20125.4		25299.9
		23087.4		28257.6		22794.4
		23904.5		31224		21585.5
		19226.6		38582.3		39103.9
		21668.6		44936.3		20037.4
		30199.6		20781		19589.6
		23867.8		23405.5		36050
		21159.9		21628.1		23972
		21277.8		47222.7		19902.7
		20597.6		33635.1		20085.5
		22142.7		42573.1		24888.6
		18539.1		20574.9		20188.8
		21293.2		20052.7		18252.3
		22194.7		48835.7		19026.2
		20951.7		30260.3		19537.5
		19713.1		45593.9		23925
		24417.3		25619.1		24875.9
		18438.6		18345.8		22113.2
		25692		32693.8		24028.5
		20079.9		43825.8		32594.7
		19115.7		20838.2		22730.3
		19199.2		44619.9		19522.7
		18893.9		35091.7		20620.3
		21400.1		21403.9		22240.9
		21542.3		36259.4		20048.7
		19545.3		18166.8		24564.2
		21320		18038.6		19741.2
		19390.2		26875.6		21578.3
		20848.2		22173.4		28279.3
		22919.8		33209.8		31482.4
		19891.2		25040.7		19419.1
		23276.4		18795.9		45330.9
		19553.9		28713.3		25906.8
		18985.3		18234.9		35917.4
		19507.2		30463.5		22241
				28774.4		32651.6
				31343.4		45483.2
				42089		31057.4
				23730.2		29044.3
				21809.5		24793.5
				34555.4		22315.8
				19820.3		26740.1
				24012.2		18141.1
				37085.4		19423.5
				23290.7		28676.5
				21871.7		27514.4
				43037.2		39512.6
				28240.2		32115
				52810.5		39398.2
				29278.8		43178.6
				41242		42423.9
				39607.2		23493
				40206.9		36577
				26755.5		30435.1
				32138.7		23193.6
				20327.6		25093.3
				20049.4		20673.6
				28685.6
				30833.9
				18910.3
				49355.6
				39332.9
				22036.6
				41590.5
				19923.6
				41852.8
				18549.4
				24409.2
				22805
				29423.8

## Sheet: mRNA
WT	WT	Q213A	Q213A	G146A	G146A	K140A/T141A	K140A/T141A
	Cycloheximide		Cycloheximide		Cycloheximide		Cycloheximide		Figure 7b
10342.7	13032.6	1117.65	14080.3	2163.64	1607.42	4919.46	2015.83
7459.89	2798.75	1763.95	2182.87	2408.5	1454	1591.14	1336.93
3413.34	2581.07	2585.79	8191.24	1642.63	434.257	2082.91	1255.37
4497.32	5591.18	2615.2	4806.95	4221.26	416.05	1599.95	1288.04
13084.5	6012.29	8234.39	3749.24	1907.46	4127.82	6684.91	1196.89
3774.62	3582.8	7347.59	7539.27	3644.17	526.1	7723.21	1148.95
2589.77	3790	5784.74	6943.67	1864.55	505.214	5095.33	1051.15
1730.81	1365.88	4005.51	4894.43	2029.12	1503.19	4316.64	1254
4250.11	5218.95	4067.07	5971.97	3495.3	1104.06	5142.78	521.429
3623.82	7956.48	2583.66	7417.07	4004.78	3381.24	5743.62	998.067
3104.47	14085.4	2002.27	4460.16	2601.74	2453.91	5266.77	1216.71
5196.1	8197.57	8056.87	10709.9	3921.45	3208.55	6689.9	914.829
3250.73	4821.81	8245.76	3636.71	5031.59	2752.48	3135.8	2591.96
2884.9	3188.63	3772.04	8245.9	2409	1698.53	6542.87	3206.04
3469.97	4348.89	3752.53	4083.89	1856.2	1543.04	5550.4	2054.34
4099.28	5397.73	795.167	812.971	1214.18	625.053	6105.44	1507.43
3026.47	7423.86	858.49	3083.33	1422.68	617.6	5789.23	3749.87
2793.15	8626.91	973.5	3958.72	2592.78	682.64	5022.62	1207.92
4100.4	1645.56	878.467	4616.51	2174.17	660.69	5277.7	922.519
6465.45	2385.41	3996.25	4182.63	1965.97	708.105	5617.83	1559.64
7636.82	1862.22	4643.73	2370.08	1985.68	660.033	1888.42	1281.56
11236.8	2278.45	3522.51	6387.35	2713.66	763.553	2299.55	1507.35
10937.5	4849.03	5157.95	1574.62	1315.3	856.762	2849.67	3095.14
6405.57	4141.89	4156.93	1508.42	2337.76	852.061	1353.4	1558.83
4993.58	3191.5	2860.48		3027.77	877.645	1810.86	2088.68
4762.24	4467.17	3525.68		3145.06	857.033	1899.71	2237
4945.88	6553.78	2264.94		2962.86	774.038	1707.64	2335.61
6607.61		2207.34		3057.24	888.625	2050.56	1323.25
4153.44		3217.53		2867.69	801.038	2076.75	719.675
5455.26		3020.43		2067.5	799.208	2191.83	2424.02
3404.31		7378.08		2456.44	2354.99	1782.72	1276.37
2915.38		675.018		5571.1	1143.33	1635.12	3519.38
3096.21		2461.53		5285.36	2980.7	3184.28	1103.52
17589		1770.94		2535.95	2464.43	4283.38	6191.77
12722.8		5284		1641.03	1639.84	1382.5	2246.08
16491.2		853.757		1292.15	1740.46	1371.66	1222.43
15383.6		1352.15		1486.41	2834.67	6802.58	1225.77
6662.14		3404.17		1425	3038.14	6771.86	1084.71
11863.8		3263.76		1437.45	912.364	5290.84	1575.25
5184.89		3653.21		1905.25	770.484	1029.11	1406.04
5063.3		3161.93		951.083	543.825	1372.83	1404.04
6670.38		3734.85		1288.41	483.067	4526	571.036
8565.11		3295.19		1584.08	1224.4	590.875	1380.57
9635.53		2962.29		1527.56	4162.21	827.1	1128.05
5066.36		1305.31		806.865	1554.83	3498.04	3051.55
2654.61		1314.81		1560.94	2618.95	5377.53	1827.7
4026.76		937.762		1881.92	2305.14	5828.14	2342.87
3603.68		1182.02		1788.25	954	2224	6094.57
2807.53		920.415		1455.44	1696.93	10757.2	852.148
3610.27		1626.55		4444.92	974.902	12586.9	950.424
3548.5		1269.61		2611.58	1662	7380.45	776.826
2860.53		1433.33		2384.46	1860.88	7110.31	763
3727.5		874.478		1458.48	2527.17	5418.04	744.667
3251.85		3858.09		2585.17	1782.28	3081.87	611.848
6482.37		5193.15		1440.47	1058.85	1162.79	594.655
4964.3		3253.07		4054.82	3083.89	4029.65	862.386
5732.64		4479.48		2676.83	1662.25	1099.76	2110.47
2678.69		1314		2609.22	4697.73	7885.12	1132.83
3561.46		1562.92		2694.93	1079.23	372.964	865.286
7821.8		1507.46		1473.94	1451.24	1733.71	769.871
3649		1579.21		3527.11	912.351	1850.03	1064.94
4863.51		1992		3292.71	581.556	5781.02	2858.23
3880.16		1495		2242.82	1530.76	2298.76	2687.83
1622.46		5958.46		2445.07	3661.84	4788.04	2682.23
916.105		6463.67		2767.56	2640.06	9106.74	1980.32
1411.44		5727.77		2434.72	3413.05	9851.56	2734.71
7167.34		2145.48		1499.44	1876.49	10720.3	1967.51
4794.89		3195		1962.67	1437.95	9373.75	2026.47
908.4		3258.73		2587.61	3677.47	6894.39	2190.14
2248.65		9022.85		1371.47	1494.14	1166.16	1512
7227.72		5342		2543.41	1393.38	733.691	1854.33
5408.35		5211.39		5317.65	832.281	1924.66	1639.44
2357.65		6009.86		2738.75	2560.61	1496.79	1678.03
19514.5		7941.11		1670.44	2568.06	1447.39	3030.73
17815.8		9275.94		1761.04	1919.62	1398.31	969.279
16349.4		7267.36		1528.05	1963.25	1203.07	1334.13
8664.3		1749.22		1904.45	1836.33	4648.02	915.16
8881.32		1950.07		2173.61	1765.43	4110.81	1543.62
6043.75		2572.03		2459.18	1034	2029.74	1131.07
7792.77		1960.42		1070.87	1822.76	6463.57	1037.41
6319.96		2258.68		811.28	2669.89	7277.83	1280
10445.7		1881.27		3356.45	2964.18	8314.59	1060.65
11700.7		1864.78		2598.2	2005.23	9194.83	1276.3
7386.66		2289.11		2442.44	1982.57	5957.31	1332.25
3105.18		2045.79		4193.26	1919.6	7126.6	1359.96
15977.1		5523.71		1662.36	1957.28	4883.58	1280.98
5848.47		6725.32		1624.82	1770.39	1577.83	1941.13
7295.07		7594.57		1740	2035.56	946.233	1386.97
5970.77		4651.5		2139.32	1661.94	1007	1576.05
4887.04		6330.5		3310.58	2135.36	5106	1640.24
6715.37		6255.5		2815.15	4612.78	4327.87	1566.45
2869.05		5353.04		2022.72	7076.85	1988.53	1232.03
3596.89		926.5		3995.31	1146	1801.5	1562.69
2227.44		1510.3		1710.31	2673.32	1273.7	1413.89
2911.64		7370.49		1292.96	981.448	3648.09	1957.19
4961.84		7621.12		1229	1163.31	1365.06	2774.27
3332.6		8601		715.32	1935.37	1266.74	2354.77
2770.06		1667.5		531.179	1344.82	1328.92	1323.46
4394.27		2778.1		347.65	1335.52	10319.7	976.781
3943.42		2683.69		591.326	1076.76	1049	1143.5
9144.38		8475.25		935.56	774.429	1521	1252.94
2723.46		7328.47		885.441	1273.17	1818.05	1842.29
4220.33		4215.78		797.143	1245.55	1286.29	1651.55
2707.21		6375.33		876.711	1378	1158.57	4657.55
3600.43		8068.54		676.565	1855.23	959.03	5905.05
4684.09		6221.14		576.111	1367.37	1037.02	5081.98
7149		4581.19		453.105	2008.82	6093.19	11048.9
14062.6		4014.44		429.029	2519.92	2161.87	12492.1
6452.11		6519.23		459.778	1222	1920.65	2912.41
3146.51		6632.59		2473.35	5905.03	2510.89	3369.48
6797.41		6120.56		1728.77	1977.12	1366.79	3948.4
10124.8		5472.22		1509.5	888	1233.24	1828.68
7942.54		2039.15		1184.4	1219.42	1599.78	2607.43
6171.65		1914.65		1471.78	707.667	2077	1884.45
7327.98		1678.11		1587.78	2249.97	2122.54	973.312
4371.82		1587		1661.61	2577.26	1383.46	2502.09
6178.69		4851.39		1430.69	5286.6	1799.46	1569.74
5980.47		4266.52		1377.45	1431.52	1686.74	1452.7
10489.6		7390.23		1405.94	2322.16	1518.73	3102.75
3250		4865.5		1406.35	5094.36	4080.25	1451.95
7865.12		3982.18		1354.88	2591.6	2793.51	1750.2
7817.52		2840.16		1587.32	1248.92	4288.12	2364.13
4440.29		2792.72		2719.55	2097.14	4515	2195.43
3323.71		2754.33		5018.97	1968.17	3961.84	2518.68
3366.52		2657.31		4437.13	2879.39	1935.87	1367.85
7838.32		2712.93		3502.39	1659.22	5912.83	1796.67
5473.83		1146.92		2718.92	1671.72	7440.05	2022.31
4441.64		7070.66		2126.84	1693.82	7094.11	1761.05
3832.03		1022.33		3512.02	2117.31	2272.25	1617
7156.14		1084.13		2902.21	1734.81	2258.49	1330.03
4378.1		8203.54		2326.03	4378.82	3204.27	836.276
4891.75		3873.17		2894.35	3091.26	2844	819.188
5932.38		1122.76		2085.05	2124.52	3647.06	762.5
3140.14		1350.79		2576.71	3265.79	2923.52	4167.08
5719.2		4712.95		2172.26	1357.89	3522.33	1399.34
675.923		2327.5		2177.53	2033.93	4058.32	3026.14
799.906		1797		2035.96	1688.19	4304.08	3154.18
445.2		6050.82		2414.77	2475.11	5385.53	790.448
684.395		1182.13		2730.21	1657.46	3813.83	862.444
9142.85		1387.14		3075.06	2319.81	3896.19	715.931
11768.7		782.202		3215.03	1745.66	7620.67	1039.63
13414		642.754		3046.81	2274.74	5684	2205.69
12098.6		3633.21		2988.5	2138.33	6421.06	1462.76
8131.84		5853.09		1258.5	1499.05	4687.65	1671.28
6239.76		5437.11		6409.74	1422.86	5324.05	2500.45
5199.32		1829.24		3228.35	3128.31	772.568	2413.74
6796.63		3758.06		4155.28	1324.84	4952.05	4627.44
5829.62		3035.89		5602.65	2558.37	4226.46	1840.3
6136.72		1342.12		2688.52	1822	888.033	2555.7
5648.23		2064.69		1491.38	1528.89	1554.66	2091
12965.7		1818.82		2878.38	1634.78	988.6	2817.77
11516.3		843.478		1057	1140.59	1929.76	2641.35
11220.3		2413.54		2088.39	1420.79	2162	2440.9
9182.11		1697.67		2647.51	1363.69	1205.37	1473.78
6635.26		2902.24		3203.38	1297.94	1501.95	2195.88
7146.04		1581.37		2689.91	2065.61	1227.2	931.385
7312.45		1961.3		2875.76	1264.03	719.594	720.39
7483.35		6030.97		7117.13	1586.43	706.417	1444.74
5929.61		5526.79		2552.37	3500.37	953.152	1949.2
10362.2		3517		860.808	3137.42	852.3	1115.85
10527.1		2848.41		1342.63	2648.8	871.741	1871.87
2922.25		2095.42		1902.73	1296.15	843.966	2263.87
10038.3		2132.16		1430.97	923.31	604.2	1662.87
5860.37		3170.03		4574.69	1283.03	797.36	1063.13
6336.71		3830.7		1263.33	717.596	4207.65	2033.46
2513.62		3531.75		1693.9	1093.38	2606.5	1670.8
7715.28		3308.49		2935.14	1046.87	6077.34	1186.31
6646.02		1444.56		4098.96	2673.47	9700.98	1835.24
2790.42		2739.94		15426.9	2609.82	12610.4	2393.79
9399.65		2178.52		2946.24	2008.23	12462	2001.86
7770.6		2490.66		2230.72	1276.5	1713.28	2793.6
2268.68		2520.42		3164.42	1892.24	1903.37	1114.11
13712.9		2435.57		2533.33	2981.75	1631.62	1835.12
1885.12		1769.05		3741.52	2597.64	1312.39	623.824
1138.5		2108.45		596.69	3015.2	1661.44	1487.68
11284.4		2660.33		723.692	1838.81	12810.6	1559.9
8229.11		3057.53		656.444	1910.92	3356.75	1264.87
2761.78		3314.24		1551.17	6679.87	9153.05	1464.33
3651.07		2240.48		2627.43	4146.36	2334.77	4130.46
3952.68		417.552		1433.89	2875.84	1418.09	2725.07
3439.62		2859.45		2909.24	2320.39	1751.45	817
3803.12		3143.6		2464.92	1080.89	1510.42	643.45
2937.11		573.755		3166.25	1529.91	2162.36	3538.68
3903.7		4790.36		1016.55	1557.5	1908.53	1144.36
3582.02		4473.69		7240.73	616.483	4524.75	1957.95
5354.44		5115.84		4408.33	966.667	1299.1	745.643
3701.43		5876.24		2012.52	2031.1	3136.06	705.444
2875.89		7446.76		1418.75	1847.28	1389.08	724.917
9760.85		2144.38		2418.53	950.327	8705.61	668.769
8421.57		1105.63		1938.67	1368.83	2890.12	655.296
11260.1		3058.74		849.526	1719.54	1641.09	2043.82
10157.8		7459.63		1033.5	1232.55	809.848	2325.2
16104.6		3840.65		2616.43	1788.79	998.967	1552.57
11843.6		6541.27		1567.64	1759.44	773.143	1600.04
10804.6		5520.69		2055.21	1491.82	688.333	2085.04
15982.7		6158.85		3475.54	1625.25	938.172	2120.17
9475.64		5335.28		2383.77	1636.85	665.057	1916.76
10154.7		6610.98		4796.44	1260.62	694.677	1815.12
10006.9		2734.06		2131.09	1064.24	658.903	1710.07
12333.7		4673.67		2497.21	1485.95	4991.36	611.04
2484.48		4473.72		1984.91	1765.03	3636.44	627.56
6107.43		5545.66		2915.78	2096.65	2015.89	2914.31
9366.85		1496.97		2493.53	3617.18	5390.14	945
11883.6		1856		3879.53	977.367	4023.07	2974.27
5135.4		1852.24		1232.38	839.051	5181.57	2325.79
6609.59		1955.26		1281.33	1333.39	5588.7	1160.05
4819.85		1858.45		1358.32	1526.23	1094.89	1902.07
6728.63		1869.8		2972.61	2451.14	6421.98	1765.87
3269.23		2021.45		2204.2	3025.9	4412.91	1124.12
6433.2		2082.1		2857.18	2097.27	1229.5	1129.27
5578.84		1915.78		3015.56	885.319	6683.56	1032.27
5515.54		1830.54		2591.4	5378	7477.92	4322.5
11470.5		1853.4		1832.83	1885.32	6656.65	1018.37
7975.41		1813.1		2795.33	1061.25	721.462	804.667
3816.3		1988.94		1930.63	1028.42	640.111	870.75
6042.52		1436.18		3298.76	3227.82	909.179	3147.37
5558.55		2127.54		2258.67	582.69	1079.31	2908.04
6467.24		2055.9		1975.79	976.605	5743.34	2940.31
5263.5		2899		1387.13	1149.97	1386.39	2114.41
5241.68		5594.17		2327.48	1487.5	2189.67	2061.78
11087		3746.55		4927	1525.33	1178.38	1438.11
4417.32		6296.59		4157.19	1272.31	629.133	1085.38
5008.65		9398.44		1398.48	1318.89	1018	1767.93
7123.94		4056.98		3014.25	1538.21	2893.52	1880.75
11626.5		5330.75		3152.43	1091.33	2943.17	1875
13493.1		6635		2749.47	2199.63	3373.27	3928.02
7998.55		6731.73		3055.7	1734.16	2087.62	3749.47
10638.8		1834.47		1339.21	1685.48	3984.82	4873.75
11475.9		7434.42		655.349	2570.02	4888.41	4024.54
13329.5		6336.45		2041.15	2010.07	5809.58	4042.08
9879.63		1451.34		998.733	1638.47	2627.65	2069.21
4836.15		1631.82		987.167	1512.05	2721.79	1046.06
2917.5		1416.53		2199.86	1362	2522.92	1433.33
15917.4		1266.62		1855.59	1755.69	2678.23	3439.76
1658.14		1645.69		1651.65	1348.61	2573.18	4258.4
10238.6		1970.37		2134.28	1484.03	2590.79	622.188
14876.1		5425.4		2053.62	1954.07	2823.09	871.233
12020.5		5867		1279.19	2347.71	4963.03	1117.07
9910.38		5345.46		749.4	2221.89	6583.71	1222.44
12960.2		2987.47		2049.94	2125.51	833.222	1060.35
9447.18		3443.45		2419.93	3069.19	816.621	1193.45
12590.7		4134.05		3082.13	2282.25	1375.36	1816.78
12493.9		3245.48		2264.09	2032.54	694	1045
6782.71		5873.7		2746.11	2691.25	964.69	2486.06
11763.5		3537.9		2389	1459.81	3006.46	4671.87
11639.3		3809.16		2369.62	1745.49	4510.93	1980.19
1894.5		9274.71		3388.08	2711.34	5126.11	1931.12
2087.5		8885.17		3358.23	3678.76	5352.7	1611
1739.63		8638.98		3018.33	1062.38	4758.2	3394.63
2007.76		8809.49		2836.41	636.833	1522.39	2020.74
1821.41		5658.24		2741.52	525.13	1401.91	777.812
1488.43		9544.3		2996.69	1335.43	1111.68	5207.35
13600		9615.33		1645.27	4129.36	2511.8	2046.74
8987.08		15213.4		2009.26	3119.22	4236.5	1667.45
12462.4		8910.07		3685.24	6913.09	4968.94	1367.38
6499		14706.6		1473.61	2771.57	5568.82	1779.97
6344.54		2935.05		3067	2051.55	2795.32	1749.55
6423.12		3063.64		2012.87	2178.76	3530.12	2151.06
14263.1		2439.73		6580.25	1936.58	5709.27	1896.43
14289.8		2032.04		4405.72	2395.23	853	1241.07
9502.54		3671.72		3196.36	2808.78	2019.19	1034.1
6782.5		3515.1		3780.69	864.839	2787.15	1096.76
5677.07		3590.11		1771.19	1814.04	3406.16	954.56
7371.15		3462		1819.1	1852.98	2200.73	2366.91
3919		5446.01		4154.9	1254.8	2285.61	1749.69
4061.65		2978.88		3052.11	1867.52	2233.91	3287.5
5585.59		6915.61		2463.63	1069.7	2765.52	2933.39
5512.25		7172.02		2909.21	1696.69	1107.26
7028.7		2232.76		2344.07	1228.27	2260.14
4089.24		2161.51		1027.7	1451.16	1892.55
5872.97		2032		1024.7	1532.65	596
5068.57		4715.27		1531.88	1326.72	1122.85
2716.58		5153.66		3623.91	1508.08	691.3
3016.48		6583.97		3374.12	443.481	902.182
8765.87		7617.69		3273.4	430.045	1501.88
5389.78		6597.67		4956.29	1210.86	1719.23
16600.4		5489.02		3487.23	1330.87	2263.72
12222		5776.08		2550.02	978.741	1262.02
13134		7180.24		1904.92	737.043	1620.17
12960.6		1270.64		1057.17	854.917	1579.76
4849.46		5649.71		1270.28	1588.42	1826
6328.39		1444.73		3562.52	2644.89	556.091
4893.61		1311.03		973.594	2377.43	624.519
4478.86		1207.97		3696.43	2760.6	4085.32
5876.84		1520.89		4439.83	2082.5	4914.84
5273.98		1245.19		2401.26	2310.22	6354.2
4988.33		1117.52		2601.58	1445.96	4781.45
6726		1698.61		2313.52	663.133	1481.74
806.867		1960.33		2762.18	412.533	7323.04
5979.65		1463.92		2005.97	2617.13	7914.07
6007.29		1501.69		1799.36	4588.73	7701.05
7073.67		1202.06		2410.24	5137.78	6060.44
7023.93		6326.29		1499.19	2987.11	2631.04
4710.23		2675.71		1677.75	3324.42	4635.83
4254.85		2892.52		2496.03	1783.68	5258.11
3074.11		4423.75		2222.25	1921.19	911.222
2005.03		907.622		1486	2362.82	2259.05
2146.14		1662.33		889	1244.8	1272.73
3988.07		1504.94		976.241	1594.6	5846.56
2755.75		5060.06		1886.28	2098.52	6744.42
3129.27		2799		1959.31	2298.1	1991.53
2981.93		4239.95		3695.47	2369.05	6769.5
		3603.37		1740.43	1645.93	1988.35
		6064.5		1589.08	3455.1	1641.34
		5079.91		1304.86	1537.39	2366.06
		3808.89		1014	1101.55	6166.8
		4154.23		1360.55	3812.33	6128.83
		5783.16		4575.14	878.018	4790.3
		4236.77		3730.22	1268.48	3509.95
		5689.78		3452.76	2804.09	3454.58
		6316.37		3990.43	694.115	4161.74
		819.179		4577.73	2799.41	1470.19
		2885.52		5442.83	1770.13	3788.73
		3787.3		4078.57	3483.28	3274.79
		4284.47		3356.3	757.088	8220.1
		4227.43		6350.08	2020.89	4103.65
		3749.46		1082.68	1066.48	4577.04
		4304.6		1202.75	838.727	21663.2
		3316.64		1378.81	1466.57	3275.17
		3272.38		2029.19	1501.9	2952.22
		4718.71		1997	3692.95	2443.57
		3085.22		1345.53	2849.88	2352.17
		2917.72		1490.98	1179.41	6065.34
		4731.98		1428.57	2434.27	4061.11
		3744.26		3179.9	746.308	2915.32
		10230.4		1312.63	1014.45	1981
		806.625		1363.6	1333	1392.45
		878.413		1210.63	1207.31	2073.69
		3344.01		1833.05	1062.72	2040
		5185.16		1994.94	967.778	5878.81
		1807.12		1881.8	1005.18	6790.92
		4754.03		1448.62		1288.39
		5266.52		1539.62		8011.55
		3668.94		2060.14		2244.5
		3348.06		1889.94		1461.03
		7277.53		1372		1460.36
		12301.8		2078		997.844
		6469.97		1298.81		1318.3
		5460.5		1403.21		1492.05
		5876.25		1962.44		1242.76
		10203.2		1533.29		1185.48
		4198.11		2234.38		2638.65
		7976.77		2118.25		1162.72
		10500.3		1294.79		1162.41
		2105.18		1870.15		1089.44
		1590.5		1736.62		971.974
		10141.4		1844.52		1219.86
		9653.46		1497.1		1505.79
		2697.59		1883.39		595.3
		3312.89		1485.52		476.284
		2211.99		1408.58		859.486
		5498.59		1165.26		482.417
		5994.92		1082		6798.36
		7563.57		1954.42		7206.02
		5172.85		957.609		7792.78
		8412.15		980.469		8572.77
		6615.16		2040.52		2431.25
		4716.36		1156.39		1876.11
		3683.57		2822.03		1438.86
		7443.68		605.5		4695.72
		4955.55		3867.47		1344.17
		5103.92		3829.93		5378.75
		5673.72		4887.37		1351.75
		4172.53		3653.19		1587.12
		4245.82		4047.39		2559.44
		3107.96		2135.96		3533.87
		5135.15		2292		3472.18
		2510.58		1441.65		11216.7
		3999.74		2383.9		1773.42
		3937.87		3127.28		860.211
		1830.1		1805.56		716
		1731.06		2174		3555.05
		5565.02		1281.79		4090.96
		3859.6		3273.38		5229.48
		3061.67		1262.27		4254.2
		2387.06		1039.56		3801.95
		7380.64		927.556		6150.38
		1954.41		2877.59		5674.02
		1187.2		3538.31		5836.34
		2241.1		4564.31		6031.27
		5372.16		3202.06		5614.56
		3555		4462.75		5969.14
		3556.02		5160.62		12591.1
		4882.5		4543.84		13958.9
		4363.65		4044.24		5112.44
		5099.61		4536.38		2829.2
		9266.61		2154.23		1750.42
		3143.92		1447.68		1710.89
		3828.21		2137.88		325.4
				1539.33		340.909
				1828.86		696.912
				1731.48		675.528
				1917.73		894.561
				2827.29		934
				1586.77		1872.6
				1817.24		1677.07
				1360.67		2599.96
				1323.88		1482.19
				1356.12		3389.57
				669.947		1243.24
				1043.67		4757.95
				1158.13		3442.17
				1525.73		4587.31
				1573.4		1811.05
				1690.36		3368.6
				1015.12		1917.7
				1137.8		3540.78
				1879.5		3038.21
				1867.7		9751
				1340.67		7739.11
				2049.5		5170
				2498.87
				2255.97
				2461.38
				2708.42
				2016.21
				1399.07
				675.352
				667.143
				3387.07
				3285.21
				1932.52
				2410.69
				2206.8
