# Supplementary material for: The cooperative binding of TDP-43 to GU-rich RNA repeats antagonizes TDP-43 aggregation
Source: eLife. 2021 Sep 7;10:e67605. doi: 10.7554/eLife.67605 (PMC8523171; doi:10.7554/eLife.67605)
Supplement: Figure 8—figure supplement 1—source data 1. [file elife-67605-fig8-figsupp1-data1.xlsx]

## Sheet: Figure 8-fig supplement 12a
Cytoplasmic/nuclear fluorescence ratio
	Hydrogen Peroxide		Hydrogen Peroxide		Hydrogen Peroxide		Hydrogen Peroxide	Hydrogen Peroxide
WT TDP-43		Q213A		G146A		T141/G142A
0.154943	0.611599	0.117242	0.165993	0.0763777	0.132502	0.0233293	0.156101
0.0098097	0.0756898	0.0459405	0.135256	0.0753959	0.134407	0.0465942	0.0647753
0.0495403	0.76032	0.178675	0.0853504	0.118621	0.0929282	0.0835669	0.0894129
0.0387515	0.30894	0.0594115	0.126515	0.0550037	0.267233	0.0632427	0.0764941
0.398064	0.234392	0.0694143	0.0808013	0.17006	0.198859	0.0485161	0.199915
0.0189059	0.0567571	0.024877	0.0925377	0.0876712	0.370142	0.307409	0.0894474
0.019347	0.193636	0.193418	0.52366	0.0806326	0.0702951	0.152199	0.13784
0.0298601	0.129928	0.0678926	0.185193	0.0872684	0.042308	0.226067	0.0648843
0.0323336	0.116207	0.0224284	0.130324	0.154534	0.275337	0.219408	0.455829
0.19879	0.292951	0.150916	0.0564673	0.362635	0.292202	0.152677	0.177116
0.123288	0.23125	0.0347782	0.181249	0.20553	0.228409	0.574616	0.0812588
0.0239786	0.0727238	0.124639	0.0788616	0.0617152	0.122593	0.0419654	0.0560287
0.0656428	0.0956298	0.115038	0.0783983	0.247257	0.294376	0.291734	0.130818
0.0431097	0.398977	0.0482994	0.142339	0.0563088	0.300428	0.0632327	0.209884
0.0430665	0.136172	0.180182	0.383407	0.164091	0.114484	0.0315569	0.300892
0.0410014	0.862384	0.0608207	0.51664	0.110377	0.293856	0.0479791	0.106151
0.0727542	0.0741616	0.0975283	0.856071	0.190681	0.358922	0.0836908	0.0671488
0.0718945	0.133294	0.0242913	1.08696	0.252421	0.0924073	0.0910933	0.0697053
0.058342	0.547163	0.0375509	0.752369	0.0549811	0.217721	0.878957	0.105116
0.178959	0.0996774	0.0919427	0.363591	0.104414	0.0728878	0.117289	0.190069
0.0268988	0.332713	0.0869876	0.115724	0.110765	0.10889	0.0857419	0.606348
0.0386728	0.0982837	0.0484429	0.103258	0.0399176	0.13108	0.104946	0.110127
0.10691	0.128191	0.0411706	0.855788	0.205906	0.0823911	0.077684	0.227823
0.0404627	0.10032	0.431276	0.869836	0.211053	0.0758645	0.104219	0.0861928
0.0602819	0.899487	0.0216425	0.110029	0.158572	0.28364	0.087018	0.636983
0.0576129	0.400532	0.0739487	0.795776	0.040084	0.34912	0.0529089	0.445003
0.0589012	0.314868	0.0571877	0.175705	0.192491	0.386042	0.0797998	0.98483
0.0487624	0.217412	0.121833	0.0837066	0.0677648	0.228318	0.0555273	0.145773
0.0991868	0.168741	0.145837	0.111687	0.260256	0.190029	0.111756	0.208134
0.130077	0.138277	0.0807979	0.465766	0.053929	0.316053	0.0594636	0.574474
0.02635	1.11044	0.0273746	0.198048	0.045033	0.076224	0.0758205	0.483587
0.00988627	0.200069	0.108238	0.213422	0.0957271	0.09869	0.109917	0.191639
0.01589	0.230769	0.0754279	1.00113	0.0534464	0.0537905	0.157592	0.0859815
0.137141	0.135183	0.187381	0.201997	0.048312	0.117669	0.070713	0.0677185
0.147605	1.50514	0.115355	0.105025	0.110896	0.0666978	0.102791	0.499212
0.0317867	0.932914	0.090602	0.62129	0.0969976	0.0919736	0.0667144	0.428994
0.088995	0.203247	0.0679882	0.347808	0.0530624	0.136942	0.0763323	0.478683
0.0795213	0.656553	0.063378	0.795595	0.114358	0.22398	0.124488	0.38965
0.0327741	1.00807	0.127207	0.172193	0.0459335	0.11496	0.394718	0.0974319
0.0073687	0.129145	0.0748755	0.147287	0.142828	0.0911055	0.1293	0.203581
0.0770031	0.584557	0.0515569	1.05572	0.0408538	0.103879	0.105852	0.376197
0.0270948	0.481286	0.037102	0.186258	0.075723	0.322668	0.816037	0.759677
0.0432683	0.376985	0.0411998	0.117817	0.209597	0.25279	0.094108	0.537327
0.0358077	0.101	0.0539513	0.309655	0.153792	0.124759	0.755992	0.555091
0.173108	0.13447	0.0793777	0.486946	0.159282	0.378183	0.0578475	0.102294
0.15444	0.276015	0.0749979	1.21945	0.408889	0.130521	0.0815197	0.206566
0.0792194	0.303333	0.132817	0.822943	0.101764	0.145041	0.0689179	0.668752
0.176712	0.652717	0.0588722	0.131235	0.0930364	0.127019	0.0846932	0.14848
0.0116154	0.728232	0.0330598	1.12785	0.155354	0.610478	0.113919	0.61058
0.0267725	0.108282	0.10085	0.862301	0.0690889	0.135526	0.232418	0.19408
0.248771	0.65214	0.132626	0.195166	0.0632341	0.27875	0.409218	0.180328
0.0345637	0.250071	0.0528445	0.736587	0.282698	0.200046	0.22809	0.496102
0.0427368	0.164632	0.0476572	0.253732	0.0435458	0.511038	0.09127	0.409377
0.207735	0.80636	0.37458	1.23773	0.155236	1.00575	0.0707262	0.0960802
0.0121155	0.0961923	0.113797	0.46001	0.0852599	0.559591	0.0996692	0.199978
0.0494018	0.18302	0.45	0.989715	0.332212	0.85594	0.101528	0.119923
0.00547606	0.652261	0.30841	0.350391	0.0527872	0.985382	0.041262	0.11723
0.0793094	1.19743	0.0827078	0.831284	0.484727	0.0338331	0.115466	0.379611
0.048118	0.444043	0.660488	0.275278	0.331223	0.0757413	0.283847	0.0888125
0.0233555	0.140935	0.151335	0.598722	0.0703768	0.347797	0.114933	0.161386
0.134095	2.31446	0.20518	0.313623	0.177461	0.178807	0.43827	0.136195
0.136284	0.547533	0.695746	1.28104	0.128421	0.177767	0.141245	0.124404
0.176682	0.438356	0.115059	2.26662	0.688903	0.0800474	0.0986422	0.108367
0.240653	0.503733	0.19404	0.279494	0.112026	0.0826588	0.31963	0.165665
0.161578	0.176476	0.127317	0.645298	0.042654	0.261495	0.0519009	0.172165
0.0308274	0.171811	0.0273706	0.803883	0.773542	0.173688	0.524181	0.0404746
0.0247532	0.08994	0.0989918	0.509348	0.407705	0.47446	0.284978	0.111888
0.0307496	0.0860022	0.222866	0.127225	0.196807	0.360701	0.28119	0.327589
0.101059	0.154614	0.0718545	0.727915	0.119659	0.0750129	0.134482	0.329217
0.0412447	0.848941	0.0876648	1.24876	0.347835	0.207726	0.0681998	0.308482
0.0229495	0.576344	0.0767544	0.954084	0.109849	0.453153	0.149053	0.242593
0.0289185	0.229511	0.129114	0.752366	0.215872	0.0791441	0.0936265	0.229393
0.0903352	0.325552	0.0493275	1.31732	0.0887918	0.592052	0.364164	0.0600213
0.0451822	0.667548	0.220521	0.55821	0.0868813	0.35444	0.169768	0.205628
0.196309	0.236544	0.0611566	0.709207	0.0763083	0.0918144	0.160036	0.837745
0.0578516	0.204848	0.366021	0.871382	0.10529	0.0937175	0.0478777	0.215779
0.0511699	0.146454	0.276831	0.115593	0.0476572	0.486454	0.738381	0.649717
0.0510255	0.168317	0.0734504	0.215927	0.193431	0.379792	0.824272	0.421017
0.0723603	0.242843	0.0588362	0.140319	0.104169	0.240142	0.0871893	0.112484
0.0497625	0.173395	0.0971232	0.100102	0.201199	0.132463	0.686609	0.0688653
0.0555285	1.65257	0.244155	0.0653483	0.151251	0.462343	0.747806	0.0957862
0.115537	0.143916	0.249487	0.108186	0.267288	0.225113	0.105898	0.125548
0.0769102	0.612042	0.0511257	0.270873	0.338954	0.114311	0.171328	0.176094
0.0291019	1.19629	0.0783679	0.50876	0.586097	0.397286	0.11018	0.102685
0.0775656	1.01349	0.0620992	0.377993	0.113471	0.140355	0.0981703	0.563644
0.14037	0.263707	0.104244	0.114897	0.343554	0.378246	0.0878685	0.0987814
0.318748	0.209324	0.0938931	0.11766	0.4	0.42132	0.0776243	0.129905
0.622793	0.712134	0.131942	0.0926816	0.307367	0.665627	0.152381	0.556352
0.0266422	0.595884	0.0664523	0.181381	0.11257	0.273128	0.108614	0.277105
0.155139	1.01284	0.0897808	0.118169	0.0489528	0.187644	0.102052	0.170781
0.0612577	0.169606	0.0672121	0.145921	0.291629	0.0914989	0.535872	0.123689
0.153077	0.107178	0.0518809	0.0980439	0.134438	0.0665631	0.073886	0.0573992
0.0405637	1.22445	0.119201	0.178152	0.186423	0.128185	0.750454	0.130407
0.0655013	0.270936	0.116061	0.0574096	0.177326	0.0425578	0.133664	0.114905
0.496731	1.09599	0.355132	0.342634	0.07367	0.14145	0.0761698	0.397516
0.272986	0.540895	0.126638	0.873181	0.146111	0.15565	0.828471	0.0903669
0.565663	0.340091	0.159802	0.466693	0.135992	0.0913453	0.691852	0.0995752
0.034824	0.38384	0.144325	0.151897	0.164099	0.0879298	0.253093	0.0898103
0.0924808	0.897785	0.127323	0.0940161	0.07977	0.121309	0.0905115	0.303759
0.041907	0.709066	0.326226	0.290291	0.611869	0.0963769	0.701349	0.083543
