# Supplementary material for: The cooperative binding of TDP-43 to GU-rich RNA repeats antagonizes TDP-43 aggregation
Source: eLife. 2021 Sep 7;10:e67605. doi: 10.7554/eLife.67605 (PMC8523171; doi:10.7554/eLife.67605)
Supplement: Figure 8—figure supplement 2—source data 1. [file elife-67605-fig8-figsupp2-data1.xlsx]

## Sheet: K140A-T141A
53193	10923	A: TDP-43 (Fluorescence Intensity)
38986	7983	B: mRNA (Fluorescence Intensity)
38526	8177
55081	9179
39742	7541
54958	10232
56260	10589
42742	8347
61045	10246
62589	11010
65535	12849
65388	12905
42272	8721
52092	10971
47982	10065
65535	12277
30347	9268
34664	9464
43150	8614
46634	10469
46008	10566
65535	11984
39563	9998
52252	9592
52657	9979
34837	9175
39935	8198
40733	10648
43985	9446
46140	10459
52247	1257
55496	12963
27128	6060
26686	6618
25024	5939
43971	7699
36947	6810
40175	7611
44604	8928
58712	9699
65405	10479
61156	9973
50313	9183
47447	9706
37490	7497
37366	6818
65531	10342
36252	6567
42197	7334
65535	9782
57295	8671
33688	7744
26262	10161
33064	8994
30173	8396
31118	8838
24125	7690
26092	9185
36692	46420
22730	32277
60130	51503
55399	58884
49857	52374
48645	46907
26391	29812
34909	39971
34473	34417
20002	16212
30834	35762
38193	42238
35506	37553
59022	65535
47213	65535
49898	65535
20293	24324
33667	43461
25249	40502
27193	45488
12550	65535
13351	65535
12237	36820
19405	30960
48238	44211
13717	25015
11320	36787
15283	65535
9864	48043
12398	43365
12514	39962
12156	47263
12719	65535
11342	65535
12044	39170
11255	34075
10829	32227
10728	33531
13482	39093
10454	36822
12625	65535
10781	40972
11946	65535
13544	61192
11626	32576
13598	33079
31916	6077
34393	6551
36074	8654
25369	5882
30627	7443
44028	9020
45132	10250
43349	9342
39173	9003
35872	8451
48537	9902
47351	10332
39515	8279
42286	8431
58925	9867
50535	8721
44134	8154
30283	5989
29585	9049
26703	6912
28314	9002
19214	5584
19821	6030
25795	7421
28237	7678
22854	9762
27711	6448
23460	8322
38779	10540
28567	7913
29010	8205
25171	7232
31436	6616
31980	5818
26940	7392
39500	7332
20842	5350
22437	5639
21167	5486
21159	5238
32314	6520
32389	6330
28121	6206
42108	6797
28856	5792
46521	7860
22402	9335
33454	10011
31863	11407
43280	15406
25929	12172
27099	14328
26460	16470
30172	19403
37176	20871
28162	17261
26453	13005
25832	9411
26703	10844
21151	8252
22711	8115
32255	11790
11745	16915
27986	5506
28736	5439
34349	5973
33977	6463
28305	6157
31048	5557
32313	14449
42770	16796
62843	21895
48407	19165
44751	22652
40855	16624
59026	19246
51436	17677
28445	19634
65535	33342
29633	13615
25301	17503
25694	20022
45299	27703
33000	17935
65535	33127
65531	33062
58909	28072
59769	30289
59462	31934
29448	14791
22116	13167
20794	25474
13007	24221
29403	30851
57814	32214
12374	25930
22041	24559
36724	19166
25509	17115
37556	17318
43367	20117
22438	11363
34602	10279
32146	12183
34250	11659
30049	9550
28498	10365
31661	12037
34720	10564
36993	12004
38725	12039
31173	8003
32240	28635
46905	43784
53960	48041
37348	39454
26236	35268
27717	29959
42266	45886
48476	51456
36953	26594
64456	61130
29111	15968
38704	24417
29316	23576
25890	24739
11784	31019
40388	45177
26256	33932
14398	27568
33703	42963
14567	42748
15304	55525
22234	33851
17675	29587
64674	47753
9792	24643
24516	11578
51367	22752
54597	24894
53460	23089
38497	14378
34034	13744
38021	19307
50966	41204
45947	41038
53368	40927
44943	39340
35866	34617
33411	33880
44749	43767
26900	30581
23381	31048
31447	32345
23708	24508
31652	43716
30826	40049
22026	22633
35333	34607
33589	30216
27537	29030
29046	28991
40836	43424
44884	53184
42949	52531
31562	39897
22351	30662
24736	30602
21963	24414
41283	52927
33107	54510
29574	38709
47834	13706
43341	12399
41100	10390
33934	10933
30435	9526
33331	12238
35317	12763
65535	18072
47180	8848
65535	11630
65535	13349
61398	13117
57937	12636
50751	11362
35056	9416
37025	8003
41425	11170
60558	12627
42335	9718
39914	10743
46719	10333
56107	11102
46302	10834
29379	8084

## Sheet: G196A
21707	32046	A: TDP-43 (Fluorescence Intensity)
33231	29575	B: mRNA (Fluorescence Intensity)
19400	28987
25600	34424
20557	24968
19914	29675
19335	25785
40103	31724
44262	28480
44618	29618
30822	37918
31107	37239
33234	34573
26024	23507
30557	33996
30423	28701
39093	31830
31706	35427
15180	21631
25190	38371
24687	27959
24825	29076
29287	35360
17892	21934
12853	22434
28520	28878
27381	29277
27034	26244
26301	27401
22006	26484
31522	32628
34142	34634
28245	24060
29966	26175
21024	20926
30664	28374
30317	26900
27481	24174
30786	24025
30751	25377
30806	28103
32528	30432
34458	31328
25758	21344
19574	19504
14671	38298
11256	27616
13231	25384
12997	27104
19028	43916
18778	43325
19453	33946
15157	28101
15295	29183
16428	33292
17788	40119
23084	44690
24670	43276
15662	36935
17317	45967
16236	40470
17499	41445
19069	38931
22614	42558
14905	25368
14798	33320
17429	37118
18750	39512
27233	50395
14352	23502
18621	34382
13766	25527
22253	33635
16933	24691
16203	23143
19196	25224
13592	13502
12324	19491
15023	18498
20198	23978
13091	16810
19408	27009
16509	26789
14999	22942
15704	17955
19900	27768
19397	24479
17933	17766
17855	24174
15178	21401
15767	24297
20749	30131
21861	34345
20520	35654
17577	31274
14464	29933
19692	26353
15779	26358
19702	25234
18729	24819
26345	34193
15928	21136
13457	17647
17999	46288
19683	45524
19842	43588
19783	33672
16502	36331
12081	26772
16423	35413
12699	25236
29436	52037
12414	24236
17406	30792
14722	25872
12279	22044
13176	25731
11804	18271
10671	16607
11733	22360
13302	25997
14552	27964
18161	39658
13208	23757
16718	30406
14538	29106
14620	21872
18325	30876
14458	22675
19053	33871
15013	29922
20503	34504
18823	36112
25483	38514
15241	31506
18051	30387
17264	35119
16336	26110
19234	35715
20343	36841
25065	43001
18397	29130
19140	38363
24786	24941
26911	22727
16084	14304
13216	10956
10911	8342
11577	8356
13213	9100
13736	11046
12934	11280
16964	16365
19173	19931
19928	16867
22847	22666
18733	16994
24622	21641
19231	16465
21142	19313
12965	11004
20011	21131
23108	21291
11126	10076
18896	25978
22480	33042
23530	34893
22236	32297
24284	39119
25964	45837
25673	43720
15229	19748
20599	33141
18164	26058
17345	16836
15104	20716
21151	31680
29024	36925
12747	15529
14416	19397
16529	25872
18850	31649
30116	38965
22084	36422
27489	38677
20984	34528
23868	36774
19823	27009
22132	29990
36248	46985
24601	42074
21600	16951
28660	41204
42689	47867
25291	35080
23391	37930
21827	29470
21601	33357
24238	44480
26580	29784

## Sheet: T233A-F234A
25116	15199	A: TDP-43 (Fluorescence Intensity)
31169	19540	B: mRNA (Fluorescence Intensity)
34206	19876
34700	22914
35045	26661
34835	24522
35364	27694
23240	14847
20609	14236
24404	19406
34992	26748
34690	22478
19135	14263
36899	27402
21424	17251
29987	25272
22446	19280
17748	25089
27846	24192
28415	25345
26626	21929
24631	28942
26568	27122
32508	34065
30444	29473
27163	27008
22217	21113
29459	20963
34855	31949
34433	28727
30581	32272
21368	18966
17135	14215
21893	16328
18723	17530
27202	22996
22079	20486
16269	14138
15078	12298
16325	15582
20521	20169
20087	14509
48855	19643
46724	23101
41381	25644
55904	25725
59874	23924
11611	49625
11704	64541
11282	52928
11782	65383
12720	31674
12884	55256
11392	65535
10998	65524
12090	62242
12189	63599
10084	54056
10987	46713
12387	65535
10598	36361
11267	65463
11315	54156
11361	50947
9405	40364
9145	26815
9606	36887
11098	65535
10620	65535
11323	65535
12043	65535
10536	62865
12718	65535
11749	65535
11382	58866
10996	56895
11574	40110
10879	65152
12561	32383
11844	65535
11775	37886
12463	65534
14364	65535
12383	65535
13216	63836
12436	45768
13060	48460
12687	52891
11635	65535
12855	65535
11964	65535
11220	65535
11390	65483
11071	52210
12692	49026
9694	65535
15129	47037
14041	60580
11275	37142
10282	65535
10249	65535
11007	41954
13572	65535
10347	65535
8546	27845
8282	32958
10255	60810
10891	59171
10691	58601
10739	62515
11264	65295
12540	65453
11327	65535
10685	65535
11890	65535
12297	65535
11865	60526
11887	65535
10643	63062
11355	65500
11496	65535
11596	47286
11784	65535
11052	65535
11160	62050
11807	65535
11157	65535
10347	65535
11211	65535
11107	61644
12360	62091
11708	57808
10585	62843
10587	65535
12207	65535
11488	59887
11838	65535
13925	65535
10855	65535
11418	59901
11645	41613
12229	65535
14587	65496
13326	65535
12595	65535
12561	65535
12394	64217
14066	65535
11044	65441
11767	65433
11853	65535
10713	44225
11595	57095
12680	65535
13990	65535
16060	10731
17655	12602
15430	11616
13870	9652
13790	11092
17203	12318
24418	17242
17713	10184
18052	8719
13572	8763
18714	13641
19577	13475
19213	9291
15047	18275
15370	10285
27189	16751
14567	9738
17793	9412
23427	16425
22151	14104
21944	11370
19230	11226
15143	11698
19740	15170
16278	9589
17171	11899
22697	65535
45794	60688
29828	56191
10793	65535
8031	64375
8993	65535
10324	65535
10222	65535
7989	65535
12799	65535
10308	65535
9433	65535
31429	65277
45660	55962
50143	59338
18819	55294
19184	59277
27796	62323
21160	45427

## Sheet: S258A-N259A
46648	52006	A: TDP-43 (Fluorescence Intensity)
65514	55042	B: mRNA (Fluorescence Intensity)
63539	59635
40624	42842
61812	54182
55624	57487
29496	35136
40714	51513
36589	50953
42416	47564
37962	49404
33630	37549
50078	58758
34987	45754
24710	49454
39709	61273
27311	41548
22408	47089
24478	49235
31677	56707
41855	59356
30753	57003
53918	65043
60946	59494
52042	61872
42476	61132
23626	32023
29357	45092
35128	57862
54747	33273
34908	36004
51718	39174
28209	28351
59091	36219
26639	26069
26523	28011
50781	38009
64356	40138
65524	40117
56760	40463
50642	39464
30483	34590
33239	55683
4907	59083
49673	58633
32090	53728
22301	38444
46391	55412
20968	41871
24870	47414
25085	44925
52232	65535
24240	40506
20358	29524
21501	33768
42577	62886
56179	65535
60661	65535
56892	65535
38009	64134
51306	65240
22260	44192
18199	38057
21070	49132
47797	59083
33178	52824
25521	53748
56459	59252
33484	51707
37628	64099
50037	63168
65535	56491
57091	62613
57561	63353
60127	55836
61915	62307
63051	60923
42028	56336
4284	57855
25330	34992
21734	31368
37673	56543
30969	50764
59088	55286
61413	54122
62971	55828
50033	56367
49077	45079
39337	59343
32362	55763
26041	36263
34465	54206
36502	59309
41041	53494
24341	38046
54108	65535
51613	58515
31945	53926
51677	60622
46654	68849
34534	51225
45682	56639
59682	65528
28301	45514
65518	45251
36863	48801
65535	52729
55340	49734
42570	51287
50362	52256
28089	49657
29129	31472
46964	63433
22335	35805
47841	65535
47439	65535
23397	35271
25933	37451
18671	37210
20273	32986
33421	59647
23070	42678
29503	43414
27159	31492
31329	47610
29273	42581
22219	26164
23182	34657
46895	65522
19356	26122
43439	64982
34660	55122
37990	52289
34659	60853
37836	48485
33410	51081
21474	27246
21039	23213
20183	26754
20503	40097
19777	37349
20234	32036
24220	37850
23826	47374
20236	39904
17116	27156
24469	52731
27392	55062
23702	30357
53170	65403
37179	59820
46347	60642
44246	53726
27544	27314
47538	50027
27703	33925
39960	53412
27711	30176
14646	31218
19652	39545
13769	26627
17429	25923
12483	18976
18573	27320
29300	40484
18808	25491
22152	27668
20047	38896
15511	24312
13904	24193
13506	21345
14407	22341
20029	37257
24040	42842
15664	22933
26031	40386
30300	55730
26633	45750
15319	22711
22969	34684
14798	31595
14097	22107
16450	24850
17811	21742
15254	26149
15710	20558
15053	21897
21007	32611
16708	22704
16051	29520
18772	29778
22696	44222
20003	40583
24427	31330
23265	49857
20296	29024
17590	22960
15981	20608
20759	29744
26785	22587
