# Supplementary material for: The cooperative binding of TDP-43 to GU-rich RNA repeats antagonizes TDP-43 aggregation
Source: eLife. 2021 Sep 7;10:e67605. doi: 10.7554/eLife.67605 (PMC8523171; doi:10.7554/eLife.67605)
Supplement: Figure 8—figure supplement 3—source data 1. [file elife-67605-fig8-figsupp3-data1.xlsx]

## Sheet: Figure 8-figure supplement 17c
Intensity of condensates (a.u.)
TDP-43 WT		G146A
	Detergent		Detergent	Detergent
0.0854342	0.027451	0.5459	0.629692
0.0847059	0.0196078	0.394694	0.752288
0.0810879	0.027451	0.324106	0.646377
0.0896901	0.0647059	0.366471	0.682147
0.0296509	0.0392157	0.33581	0.388235
0.0413273	0.027451	0.257423	0.367756
0.0966551	0.0823529	0.405392	0.597738
0.10084	0.0392157	0.440248	0.625312
0.0756303	0.0980392	0.468067	0.652661
0.0270382	0.0392157	0.463962	0.567558
0.104936	0.108824	0.307692	0.314597
0.0232278	0.0196078	0.297451	0.222926
0.0882353	0.1	0.239677	0.112045
0.131155	0.0392157	0.28915	0.527088
0.024476	0.220588	0.422391	0.299412
0.0379902	0.0392157	0.24986	0.639216
0.164404	0.0558824	0.270431	0.292745
0.155958	0.0392157	0.511312	0.6714
0.0333333	0.0470588	0.368858	0.309804
0.304986	0.195098	0.397059	0.448276
0.640931	0.0303922	0.45439	0.554003
0.0498775	0.0196078	0.343627	0.475223
0.227871	0.0196078	0.452574	0.498743
0.30719	0.0166667	0.331653	0.512281
0.189916	0.0392157	0.473638	0.56098
0.0352941	0.0392157	0.466667	0.459114
0.260681	0.027451	0.52549	0.320448
0.362229	0.0666667	0.473293	0.569386
0.278992	0.185294	0.503149	0.422129
0.36201	0.176471	0.282843	0.707382
0.0415686	0.027451	0.524949	0.462745
0.0358974	0.376471	0.402683	0.541804
0.322722	0.027451	0.331674	0.625735
0.0262575	0.0196078	0.440196	0.551277
0.0228758	1	0.284314	0.448366
0.173856	0.12549	0.393103	0.753081
0.305882	0.0196078	0.244935	0.48815
0.0446623	0.0392157	0.22902	0.444902
0.0305882	0.027451	0.342279	0.690287
0.491451	0.0196078	0.440378	0.735472
0.120664	0.0411765	0.6595	0.674889
0.335397	0.027451	0.271024	0.384941
0.384874	0.0392157	0.331961	0.679552
0.352819	0.0411765	0.168347	0.649188
0.0909551	0.0431373	0.679448	0.502884
0.0287582	0.027451	0.253431	0.386029
0.194233	0.0392157	0.3167	0.761735
0.144258	0.0588235	0.247843	0.602206
0.0499484	0.0470588	0.15098	0.351159
0.108206	0.0215686	0.202876	0.464706
0.115765	0.027451	0.16388	0.383601
0.165266	0.137255	0.120965	0.555701
0.0331825	0.0666667	0.235556	0.317762
0.464253	0.0862745	0.576827	0.727519
0.0866155	0.0823529	0.651984	0.450089
0.603017	0.0696078	0.729657	0.644291
0.166214	0.0196078	0.732843	0.623137
0.225245	0.0588235	0.687809	0.493947
0.146895	0.0784314	0.639598	0.682108
0.0416027	0.0196078	0.701651	0.271814
0.112885	0.0754902	0.515359	0.405128
0.0718266	0.0980392	0.739608	0.787729
0.0648567	0.0666667	0.608683	0.423741
0.0904866	0.0980392	0.704986	0.522328
0.0465975	0.0470588	0.882584	0.46585
0.0527778	0.0784314	0.286967	0.654664
0.427753	0.0470588	0.593772	0.633824
0.0458522	0.0862745	0.745924	0.734025
0.0454902	0.156863	0.690093	0.661064
0.118954	0.0666667	0.595343	0.646426
0.358974	0.0588235	0.357041	0.617865
0.0555781	0.12549	0.309804	0.440422
0.127753	0.114706	0.579412	0.505621
0.182202		0.35098	0.542048
0.327582		0.349321	0.611329
0.080915		0.661685	0.337691
0.111042		0.361307	0.504608
0.395808		0.421206	0.422506
0.0708333		0.358308	0.338301
0.134314		0.478431	0.640784
0.471972		0.56781	0.433218
0.0411765		0.545098	0.452801
0.082549		0.615234	0.346168
0.46152		0.306256	0.402876
0.105279		0.778582	0.438022
0.0375107		0.424627	0.408987
0.105359		0.374987	0.376471
0.104991		0.635755	0.104575
0.0520499		0.411534	0.16915
0.0403361		0.625708	0.19972
0.0439776		0.612255	0.213445
0.161689		0.374425	0.402496
0.0955182		0.414706	0.215225
0.0945098		0.542258	0.406938
0.150285		0.576157	0.615775
0.169866		0.486144	0.460566
0.14902		0.470308	0.347059
0.0400413		0.750377	0.605752
0.0421142		0.754449	0.727171
0.138667		0.36732	0.770028
0.394958		0.613726	0.739085
0.0764706		0.758627	0.800905
0.104575		0.878431	0.742275
0.0657952		0.928431	0.799855
0.094579		0.372288	0.129412
0.631082		0.612002	0.73098
0.0531373		0.417532	0.210742
0.60719		0.639379	0.346524
0.0946779		0.813834	0.289385
0.110154		0.540549	0.191554
0.590534		0.68537	0.684314
0.130015		0.259314	0.649564
0.623529		0.395737	0.511111
0.211646		0.571055	0.207151
0.203377		0.667647	0.431027
0.51943		0.265098	0.629333
0.167227		0.622794	0.773241
0.546471		0.357033	0.403167
0.55042		0.788442	0.835014
0.47638		0.822474	0.488017
0.336914		0.756392	0.170012
0.103922		0.666812	0.308683
0.375716		0.667613	0.356303
0.353695		0.659681	0.304941
0.152941		0.457843	0.603795
0.399755		0.636129	0.209701
0.202941		0.740305	0.686275
0.0517647		0.715623	0.375026
0.333987		0.55866	0.386078
0.190523		0.766797	0.757003
0.304072		0.686397	0.512605
0.489916		0.657014	0.327887
0.559578		0.774837	0.489043
0.278722		0.810381	0.502496
0.132301		0.797504	0.754771
0.293627		0.730838	0.286029
0.191422		0.417098	0.0890756
0.293137		0.922638	0.45098
0.0661884		0.720075	0.596993
0.171946		0.876018	0.44385
0.333333		0.670775	0.44406
0.380214		0.725864	0.328314
0.402179		0.593665	0.490026
0.36965		0.894314	0.374057
0.427778		0.613072	0.284804
0.364706		0.845938	0.590799
0.560261		0.74579	0.543439
0.0643382		0.759373	0.49276
0.323063		0.70098	0.456978
0.0201194		0.810392	0.560411
0.485621		0.933937	0.437647
0.483214		0.748179	0.539837
0.0512941		0.833397	0.479216
0.576611		0.780392	0.505882
0.0196078		0.737059	0.797386
0.558048		0.812549	0.56427
0.746003		0.691228	0.32033
0.0977124		0.721739	0.414338
0.0270382		0.820992	0.605942
0.131242		0.743791	0.624871
0.0263305		0.659069	0.493213
0.0345472		0.589356	0.65679
0.110517		0.50056	0.429552
0.0214178		0.706394	0.403641
0.0385199		0.779862	0.798107
0.0710054		0.422085	0.693777
0.0390452		0.661438	0.635191
0.0897059		0.482051	0.629352
0.0891731		0.49951	0.699246
0.0263305		0.803137	0.756328
0.101647		0.668534	0.381647
0.0479815		0.510784	0.519971
0.0508296		0.780784	0.436917
0.045505		0.556632	0.664475
0.233211		0.714452	0.513575
0.0375107		0.882655	0.804223
0.253257		0.851416	0.665855
0.357026		0.694943	0.712157
0.052187		0.367647	0.657479
0.260131		0.870382	0.294853
0.372362		0.333115	0.769468
0.0788927		0.850084	0.731373
0.0498599		0.611564	0.653968
0.0243137		0.465882	0.148328
0.31451		0.440998	0.505515
0.0352941		0.461319	0.69695
0.185928		0.408683	0.728205
0.276961		0.462745	0.618422
0.150528		0.398588	0.499822
0.0229692		0.350895	0.529713
0.0313726		0.352451	0.58143
0.042402		0.462325	0.635948
0.209804		0.381618	0.398492
0.10258		0.77709	0.656645
0.111765		0.602196	0.627171
0.0678922		0.61448	0.749321
0.0480392		0.712066	0.579254
0.0271709		0.369328	0.577509
0.231373		0.519608	0.675129
0.0468883		0.352451	0.611006
0.183701		0.741912	0.762647
0.196078		0.817762	0.140254
0.103828		0.789325	0.4454
0.103758		0.664706	0.235854
0.195207		0.334706	0.11634
0.0364876		0.331961	0.12493
0.0352941		0.491877	0.364893
0.138989		0.349361	0.274755
0.161928		0.400891	0.390196
0.227451		0.435149	0.137255
0.2406		0.416695
0.022549		0.79888
0.0741737		0.705071
0.212325		0.663899
0.240369		0.873284
0.16738		0.637582
0.111152		0.470462
0.0850679		0.933613
0.0865546		0.705637
0.219096		0.61224
0.127843		0.522946
0.0841355		0.337461
0.280508		0.691892
0.3		0.674851
0.171922		0.638503
0.343494		0.474359
0.682122		0.165931
0.307302		0.432644
0.184567		0.426471
0.0257255		0.323166
0.126144		0.448314
0.027451		0.268973
0.643417		0.239517
0.365531		0.383824
0.109804		0.482603
0.557124		0.431071
0.114286		0.359276
0.0963585		0.443288
0.167157		0.400163
0.092437		0.371961
0.505581		0.43268
0.653961		0.568441
0.0219608		0.513529
0.331569		0.487627
0.027451		0.416092
0.0313726		0.372549
0.602076		0.404128
0.0268477		0.51267
0.313214		0.600633
0.34391		0.613113
0.749265		0.647461
0.35207		0.722157
0.0345098		0.39888
0.284917		0.577979
0.0184874		0.461893
0.0401961		0.405333
0.188537		0.37605
0.250667		0.375439
0.0209919		0.690553
0.293184		0.533894
0.294379		0.836438
0.0711485		0.555418
0.0420992		0.594678
0.284559		0.813209
0.0223228		0.52183
0.0284314		0.487418
0.666667		0.648574
0.577342		0.433333
0.511916		0.699654
0.245675		0.741383
0.0232278		0.585848
0.476169		0.695294
0.517878		0.460483
0.0836601		0.780147
0.453148		0.667227
0.0431373
0.349198
0.0714932
0.073065
0.506162
0.0786621
0.489823
0.339646
0.534379
0.0357843
0.0624746
0.0468524
0.114248
0.0829132
0.609458
0.400302
0.0568627
0.0766013
0.0551821
0.076564
0.601525
0.207843
0.388392
0.0968326
0.448105
0.0404223
0.221662
0.0502884
0.317988
0.243137
0.249472
0.411303
0.339832
0.114306
0.0573529
0.0652261
0.492513
0.0604212
0.0464986
0.0403691
0.211373
0.631863
0.1819
0.262185
0.118736
0.37146
0.0377074
0.0344685
0.106443
0.194853
0.0769608
0.579167
0.137858
0.331034
0.0820728
0.663529
0.0196078
0.0760037
0.0986928
0.0664799
0.103719
0.0248366
0.0666667
0.0596491
0.504676
0.0509804
0.577487
0.0354902
0.145882
0.0933333
0.228835
0.0268477
0.0413273
0.0566845
0.526797
0.0969499
0.0588235
0.0145658
0.0338681
0.132086
0.149321
0.0347339
0.0337255
0.157093
0.202217
0.18988
0.218752
0.647415
0.190196
0.251307
0.200627
0.269969
0.230317
0.157482
0.22409
0.263899
0.302114
0.374547
0.0331825
0.0265283
0.19798
0.148884
0.556489
0.0968954
0.0758621
0.0221289
0.0254902
0.0535179
0.112975
0.0196078
0.247265
0.147356
0.0598693
0.108333
0.0285205
0.0268908
0.0331825
0.0305322
0.0821616
0.131373
0.0583007
0.0590542
0.39451
0.201027
0.0895928
0.413191
0.0889577
0.0702866
0.14902
0.215686
0.132353
0.0718954
0.173168
0.07507
0.261204
0.0429668
0.110118
0.357778
0.0908497
0.0532872
0.160963
0.209701
0.0281046
0.032549
0.0794118
0.101849
0.11463
0.435358
0.0254902
