# Supplementary material for: The cooperative binding of TDP-43 to GU-rich RNA repeats antagonizes TDP-43 aggregation
Source: eLife. 2021 Sep 7;10:e67605. doi: 10.7554/eLife.67605 (PMC8523171; doi:10.7554/eLife.67605)
Supplement: Figure 8—source data 1. [file elife-67605-fig8-data1.xlsx]

## Sheet: WT
TDP-43	mRNA	Fluorescence Intensity
33232	58438
24608	60389
32898	53950	A: TDP-43 (Fluorescence Intensity)
32651	50078	B: mRNA (Fluorescence Intensity)
27029	52450
58359	65535	Figure 8c
58513	64547
54405	55816
24547	30537
21876	27301
20805	23458
45221	63842
25161	27227
35023	63082
33820	52698
41516	64787
51880	65535
38031	42751
35824	61216
24551	46313
30014	60800
45716	63018
51565	65535
54003	65535
51987	65535
49799	65535
50623	65024
32421	38711
50912	63537
15791	27372
41393	64808
36832	53954
43345	61651
35190	58465
16051	12768
33337	49935
42887	49373
45231	50064
25884	35220
22415	18826
26025	29077
31098	35262
39971	41366
18304	23819
21564	21261
26716	39293
44156	35628
22382	16549
47962	44197
49611	42560
62998	42901
48917	34257
56368	40053
45781	34215
29964	24445
41348	39443
46749	41517
45182	37628
33395	25460
46016	34758
48412	38342
65535	53198
24795	22753
30398	32587
25415	27710
65535	65489
65535	65451
21671	11712
52952	41077
65343	63152
65535	64720
21163	19915
31728	20323
22701	13010
64958	50715
62937	56724
52007	46641
20669	18275
34320	25213
19373	15380
32393	33835
64919	48644
22123	21865
20531	23288
57239	52488
29474	40448
45763	46020
34311	37426
59863	65535
60679	65535
46172	59588
54482	56063
51282	63228
53662	60695
49408	56145
53916	57054
53264	63150
57856	65465
52315	62455
41128	45711
53748	48646
25219	29085
34324	38184
27013	21025
28558	22357
27150	36131
18641	28490
37335	48153
32260	38311
13574	31124
31778	50398
23001	34314
36110	38854
31691	38057
29018	33862
19792	22462
48561	61763
46291	59428
37075	51549
27510	46790
42574	64654
50732	64663
30968	45941
41992	62857
41119	63766
31962	51464
34724	55371
46015	58649
34026	45730
31374	41899
26795	33405
34374	44992
40905	50646
25031	31061
27688	30717
26131	29158
32059	42163
30403	42794
45767	62132
36941	49172
43755	57875
57070	65498
41174	59243
28649	56638
43935	65535
41510	57162
37345	60912
22342	44261
10651	26296
13698	21095
13268	24816
37600	55553
13145	31121
16398	26988
19896	34533
23475	37823
23229	36692
29661	53594
23112	39869
30837	42836
25156	50472
24266	31605
52510	64678
53799	64268
28251	45015
44078	54643
42377	55967
29100	45064
30604	50633
36626	60172
57304	65535
47572	65330
45249	62975
55607	65535
56107	65535
33985	50457
43850	65535
27624	42268
27789	43149
50378	65535
39975	64801
21612	32187
15788	34303
24110	51848
65535	58149
65535	62893
65535	60091
38548	34781
31935	29730
55318	60638
65535	62593
65535	61592
33616	42546
39877	46362
32265	45370
30632	47556
31709	56283
63634	63914
31379	44858
33850	50342
31220	46056
32556	46670
60264	64161
36084	58310
36200	64219
44114	65203
34489	48735
57392	65535
45210	63428
65533	65535
57552	63775
50146	65535
41615	63005
43604	64902
46755	55214
51747	65535
24520	46245
25050	47909
33476	65535
39240	65535
49553	65535
45442	65238
45065	65535
65535	65535
50719	65535
65535	65535
65535	65535
65535	65535
37607	65535
55797	65535
59366	65535
65535	65535
59237	65535
63901	65535
65535	65535
58347	65535
34980	65535
65535	65535
37494	65535
65535	65535
65535	65535
36397	65535
36843	65535
21995	57663
22766	54163
34189	65535
22216	48068
36738	53568
25937	51314
24746	54859
13743	44353
65534	65535
51784	65535
63999	65535
57909	65535
55219	65535
57807	65535
33328	59126
49467	65535
44972	65356
60041	65535
55131	65535
64009	65535
45647	65489
65535	65535
65535	65535
45576	65535
55027	65535
58596	65431
61890	63254
65535	65535
65493	57299
65417	60632
56900	56315
41534	52254
42062	50126
62859	63935
65492	64260
38391	63511
36051	57939
34667	54253
30762	49623
42894	54931
31519	39774
39717	39549
33799	54246
52601	53450
56868	65025
65535	65535
51442	65358
38247	65513
54637	60324
53299	56638
36587	49866
59976	61432
24358	45640
39778	42478
47596	50129
45142	39562
57529	60225

## Sheet: Q213A
29621	31851	A: TDP-43 (Fluorescence Intensity)
33471	33296	B: mRNA (Fluorescence Intensity)
35779	35198
32999	35948	Figure 8c
23085	22021
23961	22899
27890	25300
24313	30227
34162	33299
35532	34628
33966	35703
28321	25720
19575	23467
23069	25851
18476	21062
32845	35889
25103	28460
29878	33086
32104	35256
41526	62630
40038	55295
30122	46827
30139	41376
26787	34484
26493	37517
23063	29058
19968	22857
31394	39044
36357	44590
35780	45538
21022	27163
35433	43628
35066	49384
30507	41743
25243	31597
34205	40871
22630	28826
25221	26091
27755	28126
31787	32837
18513	23967
25986	37782
25596	32567
43988	42728
45026	45096
45235	45249
58353	43971
58327	43816
56225	45934
31035	30274
36059	36163
44189	44312	RFP=C
37398	42666	GFP= C
25854	32994
26893	36781
34667	37452
36324	42225
40259	38427
63974	47264
30528	32709
40306	39281
40761	42080
27662	26175
46483	38855
19991	32944
20569	24765
21521	29545
24966	32028
27355	33990
18770	20781
42831	52415
21702	25436
18438	16636
41829	41101
19405	22077
23691	28798
24590	28599
26897	34225
24690	33538
22065	26054
21623	31190
23313	23678
35542	38617
24212	28919
40311	39400
23144	33990
28905	34491
26742	32569
41653	38976
24195	26036	RFP=C
54310	45589	GFP= C
21421	20779
45250	43439
35473	39834
38326	44282
29053	30080
27845	33995
41352	38081
36673	35041
25243	53009
31453	57014
30361	56951
32339	62048
23493	48137
39470	61640
19825	48330	RFP=C
27762	65535	GFP= C
26224	52814
26725	55862
30113	59058
27046	48238
34238	60024
16089	41268
17881	38767
17583	49598
15312	47745
15196	38464
29595	59297
49115	65535
26623	46964
42468	65535
31107	65535
31659	54774
28192	42015
33936	54702	RFP=C
26793	59401	GFP= C
38368	65014
56320	65535
41550	64606
32643	54278
62509	65535
32457	36339
44875	65535
34459	65176
49460	65535
49738	65535
24364	44403
52979	65535
17681	33518
36920	37807
27153	39366
24015	37723
21790	38837
15777	39158
24838	37330
26944	39447
29923	39948	RFP=C
43790	40160	GFP= C
42321	40010
35310	48181
21909	39831
22693	34549
36523	49442
31982	44671
32353	42396
26326	33847
26956	36281
29916	40333
33668	37311	RFP=C
46966	39804	GFP= C
58403	40648
58908	40441
55847	39566
48511	36147
39725	33590
47066	41017
51331	42254
46083	44964
20711	31927
18868	29962
24724	37699
27167	31604
15885	37214
14745	30965
19636	33715
18687	27299
14533	26347
14519	24020
14924	24920
16018	24120
12588	17790
14007	23866
24623	30855
21143	26837	RFP=C
20071	24979	GFP= C
35816	39836
22606	35416
32995	38718
21193	30116
25495	35753
33200	31483
18327	20147
15273	20724
16503	26132
19787	31852
11709	22054
23960	33194
16281	23674
30106	34701
12419	22139

## Sheet: K140A-T141A
53193	10923	A: TDP-43 (Fluorescence Intensity)
38986	7983	B: mRNA (Fluorescence Intensity)
38526	8177
55081	9179
39742	7541
54958	10232	Figure 8c
56260	10589
42742	8347
61045	10246
62589	11010
65535	12849
65388	12905
42272	8721
52092	10971
47982	10065
65535	12277
30347	9268
34664	9464
43150	8614
46634	10469
46008	10566
65535	11984
39563	9998
52252	9592
52657	9979
34837	9175
39935	8198
40733	10648
43985	9446
46140	10459
52247	1257
55496	12963
27128	6060
26686	6618
25024	5939
43971	7699
36947	6810
40175	7611
44604	8928
58712	9699
65405	10479
61156	9973
50313	9183
47447	9706
37490	7497
37366	6818
65531	10342
36252	6567
42197	7334
65535	9782
57295	8671
33688	7744
26262	10161
33064	8994
30173	8396
31118	8838
24125	7690
26092	9185
36692	46420
22730	32277
60130	51503
55399	58884
49857	52374
48645	46907
26391	29812
34909	39971
34473	34417
20002	16212
30834	35762
38193	42238
35506	37553
59022	65535
47213	65535
49898	65535
20293	24324
33667	43461
25249	40502
27193	45488
12550	65535
13351	65535
12237	36820
19405	30960
48238	44211
13717	25015
11320	36787
15283	65535
9864	48043
12398	43365
12514	39962
12156	47263
12719	65535
11342	65535
12044	39170
11255	34075
10829	32227
10728	33531
13482	39093
10454	36822
12625	65535
10781	40972
11946	65535
13544	61192
11626	32576
13598	33079
31916	6077
34393	6551
36074	8654
25369	5882
30627	7443
44028	9020
45132	10250
43349	9342
39173	9003
35872	8451
48537	9902
47351	10332
39515	8279
42286	8431
58925	9867
50535	8721
44134	8154
30283	5989
29585	9049
26703	6912
28314	9002
19214	5584
19821	6030
25795	7421
28237	7678
22854	9762
27711	6448
23460	8322
38779	10540
28567	7913
29010	8205
25171	7232
31436	6616
31980	5818
26940	7392
39500	7332
20842	5350
22437	5639
21167	5486
21159	5238
32314	6520
32389	6330
28121	6206
42108	6797
28856	5792
46521	7860
22402	9335
33454	10011
31863	11407
43280	15406
25929	12172
27099	14328
26460	16470
30172	19403
37176	20871
28162	17261
26453	13005
25832	9411
26703	10844
21151	8252
22711	8115
32255	11790
11745	16915
27986	5506
28736	5439
34349	5973
33977	6463
28305	6157
31048	5557
32313	14449
42770	16796
62843	21895
48407	19165
44751	22652
40855	16624
59026	19246
51436	17677
28445	19634
65535	33342
29633	13615
25301	17503
25694	20022
45299	27703
33000	17935
65535	33127
65531	33062
58909	28072
59769	30289
59462	31934
29448	14791
22116	13167
20794	25474
13007	24221
29403	30851
57814	32214
12374	25930
22041	24559
36724	19166
25509	17115
37556	17318
43367	20117
22438	11363
34602	10279
32146	12183
34250	11659
30049	9550
28498	10365
31661	12037
34720	10564
36993	12004
38725	12039
31173	8003
32240	28635
46905	43784
53960	48041
37348	39454
26236	35268
27717	29959
42266	45886
48476	51456
36953	26594
64456	61130
29111	15968
38704	24417
29316	23576
25890	24739
11784	31019
40388	45177
26256	33932
14398	27568
33703	42963
14567	42748
15304	55525
22234	33851
17675	29587
64674	47753
9792	24643
24516	11578
51367	22752
54597	24894
53460	23089
38497	14378
34034	13744
38021	19307
50966	41204
45947	41038
53368	40927
44943	39340
35866	34617
33411	33880
44749	43767
26900	30581
23381	31048
31447	32345
23708	24508
31652	43716
30826	40049
22026	22633
35333	34607
33589	30216
27537	29030
29046	28991
40836	43424
44884	53184
42949	52531
31562	39897
22351	30662
24736	30602
21963	24414
41283	52927
33107	54510
29574	38709
47834	13706
43341	12399
41100	10390
33934	10933
30435	9526
33331	12238
35317	12763
65535	18072
47180	8848
65535	11630
65535	13349
61398	13117
57937	12636
50751	11362
35056	9416
37025	8003
41425	11170
60558	12627
42335	9718
39914	10743
46719	10333
56107	11102
46302	10834
29379	8084

## Sheet: G146A
13861	17983	A: TDP-43 (Fluorescence Intensity)
15206	20267	B: mRNA (Fluorescence Intensity)
17712	15846
17852	16149	Figure 8c
30898	28742
16322	14739
7793	37767
7113	28645
6405	28795
5788	28047
6585	63801
6782	65507
7585	65535
7988	65535
5802	51706
6201	53944
9367	42082
9757	35107
8714	35642
17961	20721
20527	22946
24056	27642
25381	31179
25322	26545
26916	29226
36149	32064
34420	32071
21564	23624
27853	28628
28148	29637
26926	24871
17107	21604
20874	27142
8262	65259
7267	32111
8959	23345
8540	63595
8565	29751
9656	32318
7735	32033
9547	41129
12280	65495
8517	25163
8297	3837
7305	2546
10271	3438
10506	3561
11006	3242
8291	3218
9203	3333
9015	3524
9924	3618
9896	3465
9891	3844
9077	3722
10801	4040
10689	4532
14718	6233
17996	5691
11735	4181
12101	4113
12228	44415
15243	4401
7872	3858
16842	8703
18658	9995
23809	7800
24859	7878
21649	7619
12284	23568
10767	50790
11643	45481
12438	64966
9563	65535
11152	61019
10114	61657
11073	2313
11041	52012
8796	52482
8436	65535
9076	56467
8433	60428
8341	62729
8886	59326
8462	65535
7583	65213
8054	65535
9097	65535
9615	65535
8995	62623
9844	65535
9786	65535
10365	60276
10738	65386
11244	64272
12037	65535
7165	52997
7760	65402
7102	65535
7391	65535
8486	29625
10371	65535
9483	65535
9332	65535
10068	65535
9616	65535
7025	38363
7027	39656
7058	53819
10226	65535
6913	28240
7296	65535
9761	4265
9644	4596
12998	4508
10344	4597
10577	4231
10073	3870
10934	4280
11406	4882
12150	4671
10128	3716
16491	7178
13640	4353
8232	3711
10909	4409
21040	7513
9520	6703
9094	7716
15364	7239
13483	7112
14474	7595
15707	6831
15395	6747
17879	7727
12552	5398
9940	4386
16329	5954
8325	3450
9782	51695
9781	26257
10608	24390
6915	65535
7878	65535
6874	48457
8362	27014
8058	33383
8222	40249
7601	57410
9377	65535
7735	34453
6612	24133
7624	65535
7699	65535
8196	65535
8305	26363
8516	65535
7886	55616
6527	65535
8961	39913
8721	65535
8065	65535
7327	65535
7554	38299
7880	65535
8532	65535
8168	64909
6907	65535
6686	57856
6714	49150
27037	8046
28394	7431
29820	7048
32469	7486
20270	7463
31263	7931
29176	7781
22721	5984
18521	6074
23052	7093
14719	65535
14606	12463
37199	12684
22130	9406
36894	14734
36311	15581
28477	15206
12282	65535
12170	65535
11591	39777
13145	65535
12750	65535
13300	65535
11975	56485
13554	65535
13262	65535
12479	24509
11349	42162
12027	65535
11825	65535
12124	65535
11379	65535
12172	65535
13222	65535
13159	65535
12360	65535
12852	65535
12790	65535
12577	24342
19945	7504
35649	12745
28398	10655
29306	9740
31706	9706
27239	10366
26771	9863
26352	7721
26688	8209
36316	10955
31261	10231
39924	11633
26706	10132
36097	12870
23088	36632
42818	13845
35302	11851
39804	14166
44497	13821
13915	45702
15030	40870
17569	65535
16859	65535
18704	22781
16318	48355
16902	65484
17088	63239
15312	65535
15248	65535
15656	65535
15054	65535
15176	65535
14884	65535
14375	65535
15005	65535
16705	4492
18308	4412
19456	5045
20030	5278
22811	5635
14108	4734
17851	4534
21638	5440
17457	5286
21847	5947
17569	4650
14043	4765
12727	3515
13391	65535
12056	65535
11243	61798
12603	4288
14451	65535
14323	65535
17012	65535
14104	65535
13438	40037
18447	4867
21047	4518
14713	4846
13293	5060
12100	3555
12098	3544
15500	4092
20557	4966
10772	4835
19666	7747
20833	12209
15669	5958
17282	4604
15132	3914
18525	4186
12950	4199
15678	4702
23160	5426
23152	5378
18112	4942
23129	9273
23525	18200
16560	10582
20619	11155
19912	11599
21096	11983
16596	25750
13760	65535
11375	65535
12002	65535
12382	65535
14196	65535
14739	65535
12450	65535
