# Supplementary material for: The cooperative binding of TDP-43 to GU-rich RNA repeats antagonizes TDP-43 aggregation
Source: eLife. 2021 Sep 7;10:e67605. doi: 10.7554/eLife.67605 (PMC8523171; doi:10.7554/eLife.67605)
Supplement: Figure 8—source data 2. [file elife-67605-fig8-data2.xlsx]

## Sheet: WT
0.00360113	0.00271611	Fluorescence Intensity	Figure 8d
0.00277714	0.00256352
0.0176547	0.0105325	A: Protein in Nucleus
0.00263981	0.00254826	B: Protein in Cytoplasm
0.0151522	0.0117494
0.00291447	0.00260929
0.00350958	0.00311284
0.00263981	0.00262455
0.00428779	0.00337224
0.00732433	0.00404364
0.0104906	0.00314336
0.0128099	0.0039826
0.00708019	0.0056611
0.00267033	0.00247196
0.00927749	0.00854505
0.00291447	0.00268559
0.00767529	0.00407416
0.0149538	0.00906386
0.0143206	0.00909438
0.002533	0.00250248
0.0142634	0.00328069
0.00291447	0.00259403
0.00689708	0.00373846
0.00355535	0.00311284
0.00254826	0.00267033
0.00895705	0.005066
0.00816358	0.00920119
0.0035172	0.00271611
0.00326543	0.00268559
0.0180056	0.0108454
0.01738	0.0145304
0.024918	0.00772107
0.0165751	0.0122072
0.013489	0.00907912
0.00299077	0.00259403
0.00262455	0.00267033
0.0107576	0.0126192
0.00260929	0.00260929
0.00248722	0.00247196
0.0138399	0.0142519
0.0141299	0.0155489
0.00283818	0.00317388
0.0130465	0.0137331
0.00282292	0.00277714
0.00267033	0.00267033
0.00662242	0.00534066
0.00251774	0.0024567
0.00555428	0.00378424
0.0103838	0.00576791
0.00250248	0.00248722
0.00254826	0.00259403
0.00301747	0.00262455
0.00348287	0.00267033
0.00575265	0.00416571
0.00262455	0.00263981
0.00276188	0.00362783
0.00297551	0.00263981
0.0194667	0.0130732
0.00671778	0.00361639
0.00393683	0.00303655
0.00747692	0.00564584
0.00273136	0.0027924
0.0201419	0.01738
0.00250248	0.00250248
0.0161898	0.00926604
0.00885023	0.00755322
0.00434882	0.0031281
0.00257877	0.00251774
0.0136835	0.007187
0.00690852	0.00517281
0.0242695	0.0113909
0.00259403	0.00250248
0.00491341	0.00384527
0.00285344	0.00259403
0.00593576	0.00479133
0.00474556	0.00328069
0.0102083	0.00715648
0.00260929	0.0024567
0.0151522	0.0120699
0.00531014	0.00486763
0.00265507	0.00349432
0.00369268	0.00296025
0.00287251	0.00260929
0.00520333	0.00323491
0.00256352	0.002533
0.00608835	0.00415045
0.00521859	0.00474556
0.010071	0.00624094
0.00300603	0.00273136
0.00321584	0.00259403
0.00265507	0.00268559
0.00256352	0.002533
0.00491341	0.00288396
0.00250248	0.00248722
0.00248722	0.0024567
0.0157626	0.00683604
0.00445563	0.00303655
0.00294499	0.002533
0.00256352	0.00247196
0.00263981	0.00261311
0.00259403	0.00257877
0.00257496	0.00254826
0.00325017	0.00303655
0.00257877	0.00277714
0.0182689	0.00376898
0.00627146	0.00302129
0.00378424	0.00306706
0.00262455	0.00259403
0.00256352	0.00257877
0.00340276	0.00274662
0.00259403	0.0028687
0.0145991	0.0142977
0.00321965	0.00274662
0.0134432	0.00994888
0.00276188	0.00277714
0.00401312	0.00307851
0.00303655	0.00268559
0.00982681	0.0065156
0.00297551	0.00260929
0.00944533	0.00735485
0.00361639	0.00289921
0.00257877	0.00274662
0.00326543	0.00273136
0.00262455	0.00247196
0.00259403	0.00270085
0.00926223	0.00843061
0.00494392	0.00337224
0.00296025	0.00502022
0.00848402	0.00630198
0.030808	0.00957504
0.00274662	0.00260929
0.00334173	0.00335698
0.00256352	0.00256352
0.00584421	0.00495918
0.00280766	0.00267033
0.00302129	0.00289921
0.0125887	0.00376898
0.0139467	0.00433356
0.00270085	0.00308232
0.00944533	0.00656519
0.00260929	0.00256352
0.0031281	0.00347906
0.00326543	0.00271611
0.0340658	0.0285344
0.0127871	0.012974
0.0191615	0.0201572
0.00308232	0.00323491
0.00291447	0.00262455
0.00274662	0.00260929
0.00265507	0.00267414
0.00442512	0.00300603
0.00256352	0.00248722
0.00251774	0.00248722
0.0200961	0.01009
0.00265507	0.00273136
0.00267033	0.00262455
0.005066	0.00292973
0.00256352	0.00259403
0.00978103	0.0104067
0.0109522	0.00597772
0.0103227	0.00604257
0.00299077	0.00306706
0.00419623	0.00314336
0.00285344	0.00268559
0.00262455	0.00257877
0.0162814	0.00430304
0.00256352	0.00256352
0.00268559	0.00256352
0.00831617	0.00513848
0.00383001	0.00343328
0.00271611	0.00326543
0.00267033	0.00273136
0.00535592	0.00416571
0.0322118	0.00722515
0.00339132	0.00299077
0.00834669	0.00981155
0.00265507	0.00268559
0.00819409	0.00407034
0.00497444	0.00492866
0.0057145	0.00381476
0.00254826	0.00251774
0.00935378	0.00457771
0.00643931	0.00562676
0.0113527	0.0100404
0.00843824	0.00743877
0.00808728	0.00772488
0.0107309	0.00713359
0.00777829	0.0063592
0.00448615	0.00300603
0.00267033	0.00262455
0.0037232	0.00340276
0.00306706	0.00271611
0.0139887	0.0144045
0.00254826	0.00248722
0.00311284	0.00260929
0.0161288	0.0101625
0.00818265	0.00395209
0.00910964	0.00467308
0.00276188	0.00271611
0.00277714	0.00548943
0.00416571	0.00293736
0.0027924	0.0027924
0.0030518	0.00280766
0.00311284	0.00283818
0.00311284	0.00546273
0.00500496	0.00369268
0.00292973	0.00271611
0.00392157	0.00415045
0.00341802	0.00487526
0.00892653	0.00830091
0.00325017	0.00314336
0.0132296	0.00796521
0.00416571	0.00318914
0.00408942	0.0026894
0.00508125	0.00389105
0.00256352	0.002533
0.00332647	0.00282292
0.00386053	0.00424201
0.00915541	0.0108339
0.00268559	0.00292973
0.0220302	0.00395209
0.00518807	0.00531014
0.0131685	0.00869764
0.00250248	0.00248722
0.0104829	0.00572213
0.00341802	0.00311284
0.00549325	0.00302129
0.00254826	0.00259403
0.00260929	0.00273136
0.00849927	0.00679026
0.0187915	0.00596628
0.00588998	0.00407034
0.00355535	0.00296025
0.00257877	0.00263981
0.0152438	0.0198405
0.00588235	0.00291447
0.0154383	0.016556
0.00282292	0.00263981
0.00288396	0.00256352
0.00688182	0.00497444
0.00395209	0.0034638
0.00268559	0.00257877
0.00257877	0.00251774
0.00270085	0.00292973
0.00259403	0.0024567
0.00262455	0.00259403
0.00786603	0.00561532
0.00273136	0.00274662
0.0148165	0.0140459
0.00273136	0.00474174
0.00292973	0.00277714
0.00602731	0.00306706
0.00271611	0.00323491
0.00685512	0.00608835
0.00257877	0.002533
0.00411612	0.00355535
0.002533	0.00275425
0.00289921	0.00267033
0.0299725	0.00660716
0.018368	0.0153964
0.00707637	0.00553903
0.00534066	0.0030518
0.00328069	0.00277714
0.00326543	0.00388342
0.00257877	0.00254826
0.00271611	0.00437934
0.00606546	0.00474556
0.0348669	0.00939956
0.00265507	0.00256352
0.0078584	0.00392157
0.00311284	0.00265507
0.00419623	0.00344091
0.00327306	0.00303655
0.0198024	0.0178988
0.00476081	0.00471504
0.00457771	0.00357061
0.00291447	0.00248341
0.0031281	0.00267033
0.00257877	0.00292973
0.00325017	0.00289921
0.0107271	0.00941482
0.00317388	0.00315862
0.0030518	0.002533
0.00296025	0.00283818
0.00546273	0.00442512
0.00259403	0.00262455
0.00970474	0.00732052
0.00271611	0.00326543
0.0032311	0.00309758
0.0111849	0.0136263
0.00277714	0.00317388
0.0149538	0.0126345
0.00251774	0.00248722
0.00853742	0.00576791
0.00285344	0.00277714
0.00302129	0.00486
0.0121042	0.0172732
0.00270085	0.00257877
0.00305562	0.00276188
0.00326543	0.00303273
0.00703441	0.00569162
0.00250248	0.00250248
0.00257877	0.00256352
0.00374609	0.00285344
0.00292973	0.00274662
0.00263981	0.00251774
0.00389105	0.0033875
0.00267033	0.00267033
0.00332647	0.00383001
0.00540169	0.00451667
0.00331121	0.00329595
0.00376898	0.00325017
0.00276188	0.00263981
0.0121004	0.0069276
0.00569162	0.00590524
0.0059205	0.00573739
0.00582132	0.00371176
0.0028687	0.00378042
0.00262455	0.00270085
0.00277714	0.00267033
0.00300603	0.00262455
0.00273136	0.00271611
0.00277714	0.00506981
0.0100099	0.00869764
0.00273136	0.00271611
0.012604	0.0117647
0.00323491	0.00288396
0.0034638	0.00291447
0.0101472	0.00816358
0.002533	0.00263981
0.00291447	0.00259403
0.00317388	0.00265507
0.0251545	0.0185512
0.00663767	0.00280766
0.00444038	0.00364309
0.0239109	0.00396735
0.00331121	0.00256352
0.00321202	0.00665293
0.00265507	0.00260929
0.00923171	0.00536736
0.00283818	0.00257877
0.0110933	0.00762951
0.00262455	0.00302129
0.00355535	0.00297551
0.00447852	0.00294499
0.00265507	0.00259403
0.00289921	0.00259403
0.0203861	0.0226177
0.00263981	0.00303655
0.00270085	0.00280766
0.00273136	0.00303655
0.00694667	0.00388342
0.00440986	0.0040589
0.0074197	0.00484855
0.00931182	0.00502022
0.00268559	0.00248722
0.00294499	0.00299077
0.00277714	0.0027924
0.00263981	0.00267033
0.0043183	0.00370794
0.00373846	0.00296025
0.00260929	0.00256352
0.00314336	0.00285344
0.00309758	0.00262455
0.0107996	0.00325399
0.00317388	0.00303655
0.00230411	0.00234989
0.00321965	0.0030518
0.0030518	0.00283818
0.00320439	0.00322728
0.00365835	0.00337987
0.00280766	0.00260929
0.0173381	0.0125238
0.00291447	0.00267033
0.035584	0.0118982
0.00650034	0.00392157
0.00300603	0.00296025
0.00578317	0.00450141
0.00408179	0.00440986
0.0091249	0.00549325
0.00268559	0.00270085
0.00247196	0.00251774
0.00541695	0.00503166
0.00303655	0.00277714
0.0173724	0.0195926
0.00328069	0.0173114
0.00265507	0.00268559
0.00299077	0.00265507
0.00265507	0.00262455
0.0208133	0.0223545
0.00329595	0.00609598
0.00277714	0.00268559
0.00307851	0.00265507
0.00294499	0.00277714
0.00270085	0.00268559
0.0108186	0.0105669
0.0107576	0.0100938
0.0222782	0.0179675
0.00282292	0.00263981
0.0244526	0.0215152
0.00729	0.00621042
0.00251774	0.00257877
0.00352102	0.00340276
0.0031281	0.00347906
0.00282292	0.00265507
0.0243267	0.0250401
0.00296788	0.00543221
0.0191806	0.00297169
0.0032845	0.00340276
0.00259403	0.00377661
0.00254826	0.00238041
0.00447089	0.00907149
0.00683604	0.00570687
0.00311284	0.00314336
0.00282292	0.00260929
0.00265507	0.00256352
0.00335698	0.00291447
0.00436408	0.00329595
0.0155261	0.0144236
0.00296025	0.00277714
0.00285344	0.00285344
0.00248722	0.0024567
0.00259403	0.00248722
0.00294499	0.00285344
0.00244144	0.00234989
0.0229877	0.0209735
0.00335698	0.00300603
0.0142061	0.0210803
0.00979629	0.010193
0.00851453	0.00384527
0.00547799	0.00331121
0.00679026	0.00437934
0.00331884	0.0031281
0.00325017	0.00604257
0.00750744	0.00630961
0.0040589	0.00488289
0.00329595	0.00334173
0.00417334	0.00392157
0.00331121	0.00306706
0.00288396	0.00259022
0.0196689	0.0246738
0.00296025	0.00283818
0.0122644	0.0125124
0.00268559	0.00282292
0.00321965	0.00317388
0.00265507	0.00250248
0.0187724	0.0263981
0.0112917	0.0113527
0.00288396	0.00282292
0.00274662	0.00276188
0.00271611	0.00271611
0.00384527	0.00254826
0.00889982	0.00593576
0.00250248	0.0024567
0.0168154	0.0166781
0.00300603	0.00262455
0.00265507	0.00248722
0.0113794	0.0119135
0.00348287	0.00270085
0.00314336	0.00256352
0.0273709	0.027039
0.0078584	0.00482185
0.0131914	0.0123598
0.0129549	0.0080415
0.002533	0.00247196
0.00259403	0.00242618
0.00292973	0.00260929
0.00390631	0.00289921
0.00302129	0.00247196
0.0103838	0.00267033
0.00415045	0.0031281
0.00387579	0.00292973
0.0118105	0.00517281
0.0030251	0.002533
0.00297551	0.002533
0.00265507	0.0024567
0.00265507	0.00257877
0.0031281	0.00326543
0.00289921	0.00250248
0.00303655	0.00254826
0.00865187	0.00663767
0.00263981	0.00254826
0.0025864	0.00244144
0.0031281	0.00254826
0.00497444	0.00274662
0.0100404	0.00668727
0.00775158	0.00598154
0.00437934	0.00282292
0.0187991	0.0169528
0.0220798	0.0260471
0.0170672	0.0135958
0.00265507	0.00250248
0.00264363	0.0024567
0.00354009	0.00273136
0.00315862	0.00283818
0.00251774	0.00242618
0.00395209	0.0028687
0.0128176	0.0135233
0.00309758	0.00265507
0.00321965	0.00262455
0.00254826	0.00239567
0.0125048	0.015362
0.00396735	0.00303655
0.00676356	0.0040589
0.00367742	0.00268559
0.00302129	0.0027924
0.00314336	0.00288396
0.0059205	0.00311284
0.0030518	0.00256352
0.0196384	0.0161364
0.00300603	0.00263981
0.00260929	0.00251774
0.00262455	0.00247196
0.0033875	0.00267033
0.00288396	0.002533
0.0118257	0.0140078
0.0132105	0.0130007
0.00350958	0.00282292
0.00268559	0.00250248
0.00941482	0.00663767
0.00267033	0.00256352
0.00257877	0.00242618
0.00343328	0.00238041
0.002533	0.00248722
0.00306706	0.00332265
0.00284581	0.00239567
0.00271611	0.0031281
0.00254826	0.00256352
0.00688182	0.00526436
0.00262455	0.00276188
0.00262455	0.00265507
0.00259785	0.00231937
0.00672923	0.00604257
0.00543221	0.00444038
0.0207141	0.0116693
0.00268559	0.00300603
0.00355535	0.00254826
0.0087892	0.00804532
0.00825513	0.00476463
0.00325017	0.00296025
0.00248722	0.00244144
0.0152323	0.0105287
0.0222019	0.00331884
0.00300603	0.00262455
0.00276188	0.00263981
0.00267033	0.002533
0.00259403	0.00238041
0.0031281	0.00268559
0.00289921	0.00259403
0.00350958	0.00241093
0.0109712	0.00529488
0.00289921	0.00257877
0.00273136	0.0027924
0.00271611	0.00267033
0.00283818	0.00318914
0.0358091	0.0119821
0.00317388	0.00273136
0.00321965	0.00349432
0.00584421	0.00508125
0.00273136	0.00247196
0.0083772	0.00653849
0.00480659	0.00411994
0.0040856	0.00263981
0.00317769	0.00259403
0.00421149	0.0033875
0.00672923	0.0055314
0.00262455	0.00256352
0.00587472	0.00263981
0.00401312	0.00413138
0.00395209	0.00308232
0.00459297	0.00318914
0.00277714	0.00262455
0.00347524	0.00277714
0.00296025	0.00686275
0.00268559	0.00248722
0.00257115	0.00250248
0.00303655	0.00634012
0.00895705	0.00593576
0.0157778	0.010296
0.00386816	0.00296025
0.00238041	0.00238041
0.00462348	0.00586709
0.00282292	0.00251774
0.00259785	0.00259403
0.00256352	0.00244144
0.00241093	0.00236515
0.0234874	0.0199474
0.00812161	0.00512703
0.00267033	0.00259403
0.0027924	0.00259403
0.00357061	0.00300603
0.00390631	0.00294499
0.0159457	0.0113527
0.00283818	0.00276188
0.00436408	0.00354009
0.00267033	0.00268559
0.0112306	0.00920119
0.00257877	0.00250248
0.00841154	0.00775158
0.00984207	0.00805676
0.00306706	0.00263981
0.0106165	0.0102502
0.0179446	0.0171664
0.00257877	0.00254826
0.0110781	0.0126764
0.00265507	0.00270085
0.002533	0.00248722
0.00251774	0.00250248
0.00555428	0.00323491
0.00260929	0.002533
0.00947204	0.00581369
0.00260929	0.00260929
0.00265507	0.00248722
0.0136149	0.00877775
0.0034638	0.00270085
0.00700389	0.00619516
0.00325017	0.00262455
0.00260929	0.00256352
0.00306706	0.00257877
0.00357061	0.00263981
0.00329595	0.00296025
0.0043946	0.00347906
0.00862898	0.00669871
0.00268559	0.00257877
0.00315862	0.0031281
0.00393683	0.00268559
0.00820935	0.0039826
0.002533	0.00250248
0.00263981	0.00259403
0.00542077	0.00318532
0.00543221	0.00451667
0.0148775	0.0167544
0.00268559	0.00300603
0.00328069	0.00297551
0.00378424	0.00326543
0.00587472	0.00358587
0.00282292	0.00263981
0.00709545	0.00575265
0.0037232	0.002533
0.00329595	0.00282292
0.0129816	0.0121004
0.00267033	0.00257877
0.0216449	0.0130617
0.0039826	0.00325017
0.00479133	0.00450141
0.00722133	0.00383001
0.00755322	0.00488289
0.0110323	0.00442512
0.0124361	0.00807202
0.00270085	0.00267033
0.00262455	0.002533
0.00489815	0.00325017
0.00679026	0.00553903
0.00263981	0.00262455
0.00680552	0.00515755
0.00700389	0.00601205
0.00259403	0.00277714
0.00340276	0.00297551
0.0146487	0.013611
0.00352483	0.00282292
0.00944533	0.00843824
0.0125124	0.00756847
0.00273136	0.00256352
0.00735866	0.00485237
0.00358587	0.00309758
0.00250248	0.00248722
0.00311284	0.00268559
0.00537118	0.00437171
0.00291447	0.00285344
0.00427253	0.00775158
0.00292973	0.00265507
0.00259403	0.00254826
0.00369268	0.00332647
0.00341802	0.00277714
0.00300603	0.0027924
0.00302129	0.00274662
0.00424201	0.0033875
0.00326543	0.00294499
0.0110552	0.0108339
0.00306706	0.00285344
0.00283818	0.00273136
0.0108644	0.00956741
0.00268177	0.00303655
0.00260929	0.00256352
0.00530251	0.00296025
0.00357061	0.00294499
0.00442893	0.00355535
0.00274662	0.00263981
0.0043946	0.00302129
0.00785077	0.00556954
0.00358587	0.00331121
0.00282292	0.00306706
0.00308232	0.00289921
0.0037232	0.00292592
0.00462348	0.00402838
0.0120394	0.00303655
0.00872816	0.00698863
0.00341802	0.00296025
0.00434882	0.00283818
0.00358587	0.00292973
0.00471504	0.00352483
0.00440986	0.0034638
0.0031281	0.00288396
0.00260929	0.00268559
0.0173877	0.0179599
0.00314336	0.00265507
0.00315862	0.00265507
0.00680552	0.00404364
0.0125315	0.0129091
0.00265507	0.00257877
0.00267033	0.00285344
0.00271611	0.00263981
0.00930037	0.0108492
0.00270085	0.00262455
0.00961318	0.0119173
0.00263981	0.00267033
0.00257877	0.00257877
0.00257877	0.00260929
0.00450141	0.0043946
0.00296025	0.00270085
0.00288396	0.00268559
0.00273136	0.00256352
0.00392157	0.00283818
0.00250248	0.00247196
0.00477607	0.00289921
0.00463874	0.00369268
0.00401312	0.00280766
0.0103876	0.00440986
0.00277714	0.002533
0.00511559	0.00355535
0.0329557	0.0292287
0.00273136	0.0030518
0.0225834	0.0222019
0.00262455	0.00260929
0.00611887	0.00512703
0.00260548	0.00259403
0.00334173	0.00302129
0.00263981	0.00254826
0.0115816	0.00934997
0.00849927	0.00640116
0.00291447	0.00296025
0.00270085	0.00294499
0.00288396	0.00300603
0.00434501	0.00332647
0.00296025	0.00268559
0.00283818	0.00274662
0.00689708	0.00700389
0.00259403	0.00257877
0.00283818	0.00426108
0.010132	0.00939956
0.00291447	0.00267033
0.00280766	0.00471504
0.011429	0.0099794
0.00257877	0.00254826
0.010174	0.0129091
0.0176509	0.0200198
0.00277714	0.00271611
0.00300603	0.00267033
0.0135653	0.0159152
0.00257877	0.002533
0.00492866	0.00425727
0.00425727	0.00415045
0.00354009	0.00308232
0.00276188	0.00259403
0.00584421	0.00392157
0.00737011	0.00616464
0.00314336	0.00292973
0.00311284	0.00267033
0.0079881	0.00456245
0.00418097	0.00314336
0.00332647	0.00314336
0.00277714	0.00268559
0.0043183	0.00632105
0.00479133	0.00328069
0.00605783	0.00518807
0.00260929	0.00254826
0.0154116	0.0159342
0.00317388	0.00294499
0.00390631	0.00306706
0.00352483	0.0024567
0.0053254	0.00416571
0.00329595	0.00280766
0.0159953	0.0148623
0.00978103	0.0089723
0.00260929	0.00263981
0.0171664	0.0189746
0.00267033	0.00254826
0.00267033	0.00373846
0.0027924	0.00267033
0.00277714	0.00256352
0.00262455	0.00257877
0.00267033	0.00280766
0.00834287	0.00872816
0.0317998	0.00518807
0.00283818	0.00308232
0.00517281	0.0033875
0.00457771	0.00370794
0.00306706	0.00263981
0.00454719	0.00370794
0.00454719	0.0041352
0.00308232	0.00482185
0.011162	0.011181
0.00303655	0.00277714
0.0167544	0.0176089
0.0124971	0.016846
0.033051	0.0168154
0.00260929	0.00259403
0.00329595	0.00292973
0.00596628	0.00389105
0.018616	0.0206302
0.00273136	0.00274662
0.00267033	0.00273136
0.0030518	0.00262455
0.00268559	0.0024567
0.00288396	0.005066
0.00482185	0.00517281
0.00415045	0.00282292
0.00389105	0.0031281
0.00288396	0.00268559
0.00360113	0.00303655
0.00320439	0.00285344
0.00700389	0.00714122
0.0037232	0.00315862
0.00383001	0.0028687
0.00274662	0.00375372
0.00280766	0.00268559
0.00260929	0.002533
0.00463874	0.00332647
0.00430304	0.0037232
0.00270085	0.00263981
0.00344854	0.0031281
0.00469978	0.00437552
0.00315862	0.00318914
0.00343328	0.00354009
0.0106851	0.00933471
0.0136873	0.0147669
0.0113222	0.0132906
0.0172122	0.0165408
0.007187	0.00606165
0.00325017	0.00299077
0.00572213	0.00433356
0.00885023	0.0112612
0.00970474	0.00611887
0.00436408	0.00315862
0.00303655	0.00276188
0.00806439	0.00956741
0.00262455	0.00254826
0.00759899	0.00573739
0.0127756	0.00866712
0.00543221	0.00354009
0.00895705	0.00753796
0.00257877	0.00254826
0.00257877	0.00309758
0.00262455	0.00257877
0.00354009	0.00357824
0.00268559	0.00260929
0.00265507	0.00254826
0.0034638	0.00325017
0.00337224	0.00277714
0.00425727	0.00361639
0.0191615	0.00733959
0.0106661	0.0110246
0.00448615	0.00329595
0.00302129	0.00383001
0.00270085	0.00268559
0.00276188	0.00259022
0.00459297	0.00347906
0.00328069	0.00262455
0.00259403	0.00263981
0.00273136	0.00271611
0.00392157	0.00354009
0.00268559	0.00270085
0.00821317	0.011017
0.00277714	0.00247196
0.00387579	0.00357061
0.0136606	0.00985733
0.00370794	0.00292592
0.00292973	0.00277714
0.0043946	0.0043183
0.00260929	0.00251774
0.00294499	0.00285344
0.00267033	0.00265507
0.0187228	0.0124971
0.00531014	0.00331121
0.00262455	0.00262455
0.00552377	0.00485237
0.00286107	0.00401312
0.00294118	0.00310521
0.0145724	0.0168154
0.00340276	0.00523766
0.00260929	0.00251774
0.0146105	0.0177005
0.00469596	0.00306706
0.00265507	0.00254826
0.00289921	0.00292973
0.0126688	0.0081178
0.00390631	0.00350958
0.00502022	0.0039826
0.00735485	0.00584421
0.0028687	0.00304417
0.00264363	0.00268559
0.00972	0.007187
0.00637827	0.00825513
0.00377279	0.00502022
0.00623713	0.0059205
0.0030518	0.00309758
0.014683	0.0227588
0.016907	0.0171244
0.0211299	0.00860609
0.00267033	0.00250248
0.00267033	0.00259022
0.00318151	0.00329595
0.00448615	0.00393683
0.00497444	0.00457771
0.0215763	0.0057908
0.00869764	0.0130083
0.00378424	0.00370794
0.0117189	0.0104028
0.00320439	0.00319677
0.00361639	0.00502022

## Sheet: Q213A
0.0051194	0.00342947	Fluorescence Intensity	Figure 8d
0.00308232	0.00354391
0.00263981	0.00277714	A: Protein in Nucleus
0.00267033	0.00281147	B: Protein in Cytoplasm
0.00268559	0.00262455
0.0219654	0.00999466
0.00282292	0.00239567
0.00272374	0.00277714
0.00831617	0.00334173
0.0364996	0.0321012
0.026154	0.0181735
0.00268559	0.00268559
0.0033875	0.00291447
0.0124208	0.0131685
0.00424201	0.00326543
0.00775921	0.00551614
0.00343328	0.00289921
0.0163043	0.0137331
0.00901808	0.00453193
0.0192035	0.0115969
0.00411994	0.00325017
0.00364691	0.0028687
0.0148623	0.00517281
0.00483711	0.0037232
0.0152132	0.0088922
0.00268559	0.002533
0.00256352	0.00259403
0.00764477	0.00500496
0.0030518	0.002533
0.00271611	0.00262455
0.00256733	0.00250248
0.00699245	0.00672923
0.00256352	0.002533
0.0103647	0.0107576
0.00550851	0.00469978
0.00299077	0.00263981
0.00262455	0.00267033
0.00282292	0.00268559
0.00259403	0.00257877
0.00570687	0.0030518
0.0118715	0.0107118
0.00289921	0.00257877
0.0116426	0.0140078
0.00495537	0.00369268
0.00262455	0.00260929
0.00689708	0.00483711
0.0135843	0.011902
0.00701915	0.0062562
0.00256352	0.00254826
0.00910964	0.00309758
0.00741588	0.00389105
0.00335698	0.00732052
0.00270085	0.00274662
0.00270085	0.00270085
0.00259403	0.00254826
0.0102502	0.0081178
0.0058175	0.00422675
0.0028687	0.00344854
0.00259403	0.00256352
0.0027924	0.00263981
0.00444038	0.00299077
0.00271611	0.00280766
0.00544747	0.00383001
0.00260929	0.00463111
0.0306859	0.0065919
0.00285344	0.0031281
0.00303655	0.00325017
0.0103304	0.0091249
0.00926223	0.00810254
0.00259403	0.00276188
0.00257877	0.00250248
0.0181506	0.0100099
0.0138132	0.0191882
0.0104524	0.00434882
0.00332647	0.00299077
0.00273136	0.00270085
0.00445563	0.00357061
0.00260929	0.00260929
0.00265507	0.00260929
0.00743114	0.00561532
0.00502022	0.00363165
0.0031281	0.0028687
0.00265507	0.0030518
0.00317388	0.00271611
0.00265507	0.00259403
0.00410468	0.00341802
0.00262455	0.00262455
0.00393683	0.00442893
0.00703441	0.00563058
0.00494392	0.0034638
0.0109369	0.0059968
0.00926986	0.0106203
0.00643168	0.00337224
0.0152934	0.00807202
0.00297551	0.00276188
0.00495918	0.00370794
0.0138972	0.00668345
0.00879683	0.0113069
0.0125277	0.00791943
0.00334173	0.00355535
0.0117342	0.00614939
0.00924697	0.00807202
0.00256352	0.00254826
0.00282292	0.00283818
0.00686656	0.00636301
0.00299077	0.00296025
0.0231098	0.0112154
0.00254826	0.00248722
0.0166285	0.00807965
0.0162203	0.00657282
0.00268559	0.00265507
0.00647364	0.004654
0.00523003	0.00309758
0.00740444	0.00361639
0.00285344	0.00381476
0.00939956	0.00685512
0.00825513	0.00422675
0.00263981	0.002533
0.00956359	0.00318914
0.00526436	0.00720226
0.00740063	0.00581369
0.00899901	0.0106165
0.00352483	0.00318914
0.00260929	0.00260929
0.00280766	0.00393683
0.00706493	0.00463874
0.00334173	0.00277714
0.00766766	0.00798047
0.00254826	0.00251774
0.0028687	0.00262455
0.00277714	0.00466926
0.00267033	0.00265507
0.00273136	0.00296025
0.00654612	0.00364691
0.00393683	0.00288396
0.00340276	0.00315862
0.0149386	0.0117342
0.00343328	0.0028687
0.00639353	0.00706493
0.00420386	0.00308232
0.00268559	0.00263981
0.00308232	0.00282292
0.00764477	0.00323491
0.00276188	0.00270085
0.0110475	0.00660716
0.00920119	0.00585946
0.00262455	0.00257877
0.00593576	0.00560769
0.00664912	0.00549325
0.0131037	0.0151827
0.00292973	0.00277714
0.0122377	0.0138552
0.0482338	0.0278325
0.00263981	0.00256352
0.00587472	0.0043946
0.019913	0.0239261
0.011162	0.0144045
0.00271611	0.00256352
0.0124971	0.00999466
0.0083772	0.00717174
0.00296025	0.0028687
0.00790417	0.00497444
0.0109712	0.0143893
0.00296025	0.00276188
0.00296025	0.00265507
0.00483711	0.00442512
0.00267033	0.00270085
0.00292973	0.00260929
0.00311284	0.00268559
0.00267033	0.00262455
0.00677501	0.00508125
0.0065919	0.00440986
0.00952544	0.0107042
0.00283818	0.00476081
0.00285344	0.00280766
0.00276188	0.00283818
0.00277714	0.00267033
0.0106546	0.00829709
0.00280766	0.0030518
0.00262455	0.00263981
0.00280766	0.00257877
0.00267033	0.00267033
0.00354009	0.0106775
0.00303655	0.002636
0.0326696	0.00753796
0.00276188	0.0026627
0.0153658	0.0200809
0.00270085	0.00268559
0.0147097	0.0113222
0.00313191	0.00931563
0.00866712	0.00723278
0.00288396	0.00306706
0.0031281	0.00254826
0.00265507	0.00274662
0.00288396	0.00267033
0.00277714	0.0028687
0.0043183	0.00317388
0.0162852	0.0147784
0.00323491	0.00294499
0.00366217	0.00337224
0.00856031	0.00658808
0.00389105	0.00297169
0.0100862	0.00393683
0.00291447	0.00280766
0.00262455	0.00260929
0.0030518	0.00282292
0.0124361	0.0146487
0.00320439	0.00368505
0.0034638	0.0030518
0.00267033	0.00250248
0.0177539	0.0169985
0.00260929	0.00257877
0.0176394	0.0144656
0.00285344	0.00273136
0.00492866	0.00587854
0.00349432	0.00283818
0.00300603	0.00321584
0.00268559	0.00273136
0.0119783	0.00600443
0.00456245	0.00311284
0.00408942	0.00329595
0.0144808	0.0103304
0.00808728	0.00848402
0.00282292	0.00280766
0.0143587	0.0185702
0.00270085	0.00268559
0.00335698	0.00292973
0.00271611	0.0030518
0.0056611	0.00404364
0.00262455	0.00263981
0.0185512	0.0160906
0.00364691	0.00314336
0.00283818	0.00256352
0.00262455	0.00259403
0.00265507	0.00271611
0.00331121	0.00283818
0.0119135	0.0181582
0.00262455	0.00262455
0.0027924	0.00268559
0.00386053	0.00306706
0.00268559	0.00268559
0.00509651	0.00352483
0.00369268	0.00280766
0.00779736	0.00653086
0.00851835	0.0049897
0.00410468	0.00344854
0.0120089	0.0184672
0.00442512	0.0041352
0.0101167	0.0126345
0.0103456	0.0104448
0.00602731	0.00582895
0.00451286	0.00291447
0.00260929	0.00256352
0.00283818	0.00357061
0.0027924	0.00271611
0.00277714	0.00309758
0.00268559	0.00270085
0.00297551	0.0027924
0.00331121	0.00273136
0.00270085	0.00270085
0.00318914	0.0030518
0.0068513	0.00677501
0.00285344	0.00334173
0.00352483	0.00274662
0.00363165	0.00359731
0.0060502	0.00630198
0.00695048	0.00474556
0.0189555	0.0108949
0.00270085	0.00276188
0.00274662	0.00294499
0.00282292	0.00280766
0.00274662	0.00273136
0.00476081	0.00317388
0.00270085	0.00317388
0.00842298	0.00975052
0.00520333	0.00396735
0.00387579	0.00314336
0.0156786	0.0120089
0.00294499	0.00274662
0.00637827	0.0059205
0.00805295	0.00694286
0.00259403	0.00254826
0.0027924	0.00274662
0.00416571	0.00360113
0.00274662	0.0027924
0.00285344	0.00283818
0.014313	0.00808728
0.00758373	0.00500496
0.00260929	0.00254826
0.00854505	0.0059968
0.00400168	0.00781262
0.014992	0.0117838
0.0035172	0.00292973
0.027409	0.0236973
0.00299077	0.00288396
0.0062562	0.00463874
0.00476081	0.00408179
0.00300603	0.00303655
0.00263981	0.00285344
0.00704967	0.00531014
0.0112993	0.0116007
0.0035668	0.0031281
0.00428779	0.00434882
0.00411994	0.00358587
0.0192111	0.018967
0.00285344	0.00273136
0.00872816	0.00863661
0.0132753	0.0101778
0.00402838	0.0041352
0.00271611	0.00262455
0.0027924	0.00277714
0.0102083	0.00703441
0.00830091	0.0108034
0.0031281	0.00289921
0.00721752	0.00581369
0.00283818	0.00270085
0.0137636	0.0175937
0.00321965	0.00282292
0.00280766	0.00289921
0.0100404	0.00758373
0.00302129	0.0052491
0.00769055	0.00712596
0.00370794	0.00323491
0.0154726	0.0184329
0.00289921	0.00277714
0.00270085	0.00265507
0.00296025	0.00367742
0.00341802	0.0030518
0.00263981	0.00267033
0.00491341	0.00347906
0.00251774	0.00254826
0.0128786	0.0182193
0.00392538	0.00517662
0.00289921	0.00299077
0.015938	0.0271916
0.00901427	0.00402838
0.00291447	0.00262455
0.00441749	0.0150034
0.0132181	0.0055848
0.00326543	0.0028687
0.00282292	0.00265507
0.00268559	0.00268559
0.0130922	0.00874342
0.00277714	0.00299077
0.00337224	0.00329595
0.0104295	0.0140841
0.00276188	0.00271611
0.00637827	0.00505074
0.014786	0.00918593
0.00277714	0.0027924
0.00302129	0.00297551
0.00308232	0.00326543
0.0117189	0.0115625
0.00673686	0.00401312
0.00337224	0.00436027
0.0087892	0.00610361
0.00270085	0.00265507
0.0105135	0.00474556
0.00444038	0.0041352
0.00581369	0.00403601
0.00363165	0.00311284
0.0033875	0.00604639
0.00270085	0.00270085
0.00271611	0.00285344
0.00294499	0.00294499
0.0165675	0.0273899
0.00842298	0.00462348
0.0105516	0.0123941
0.00840772	0.00511177
0.00320439	0.00291447
0.00254826	0.00250248
0.00263981	0.00270085
0.0030518	0.00345617
0.00267796	0.00263981
0.00653086	0.00569162
0.00401312	0.00411994
0.00827039	0.0083772
0.00454719	0.00411994
0.00773632	0.00785077
0.0030518	0.00289921
0.00777447	0.00492866
0.00292973	0.0033875
0.00657664	0.00430304
0.0066186	0.00770581
0.00273518	0.00350958
0.00552377	0.00411994
0.0144274	0.00426108
0.00288396	0.00270085
0.00492866	0.00474556
0.00280766	0.00265507
0.00282292	0.00309758
0.00359731	0.00282292
0.00265507	0.00268559
0.00967422	0.0107576
0.00280766	0.00291447
0.00288014	0.00320439
0.00723278	0.00355535
0.00300603	0.00297551
0.00268559	0.00263981
0.00316243	0.00332647
0.00262455	0.00262455
0.00410468	0.00404364
0.00353246	0.00320439
0.0161784	0.00968566
0.00263981	0.002533
0.00303273	0.002533
0.00337224	0.00315862
0.00373846	0.00320439
0.00350958	0.00280766
0.00334173	0.00331121
0.0230983	0.0145418
0.00783932	0.00875868
0.00273136	0.00277714
0.00285344	0.00262455
0.00373846	0.00802625
0.0030518	0.00311284
0.00271611	0.00257877
0.00502022	0.00450141
0.0144045	0.0061799
0.0329175	0.029099
0.0138552	0.0150607
0.0166972	0.0232624
0.00790417	0.0100862
0.00260929	0.00260929
0.00265507	0.0030251
0.00271611	0.00262455
0.00515373	0.00334173
0.0147402	0.0173304
0.00259403	0.00259403
0.00283818	0.00277714
0.00671397	0.00308232
0.020264	0.0235599
0.00291447	0.00282292
0.00283818	0.00277714
0.00283818	0.00260929
0.00297551	0.00283818
0.00538262	0.0037232
0.00440223	0.00375372
0.00636683	0.00302129
0.00280766	0.00263981
0.00933089	0.00981918
0.00276188	0.0027924
0.00915541	0.00779736
0.00361639	0.00540169
0.0192569	0.0200732
0.00364309	0.00479896
0.00282292	0.00267033
0.00297169	0.00276188
0.00282292	0.00292973
0.00265507	0.00341802
0.00267033	0.00256352
0.00299077	0.00288396
0.00259403	0.00254826
0.00259403	0.00257877
0.00280766	0.0028687
0.0325017	0.0167468
0.00314336	0.00318914
0.0145228	0.0100252
0.00547799	0.00363165
0.00985733	0.00605783
0.00261692	0.00259403
0.0043183	0.00373846
0.00323491	0.00347906
0.00305943	0.0034638
0.00420768	0.00318914
0.00868238	0.00358587
0.0160678	0.0120317
0.00331121	0.0078584
0.00288396	0.00268559
0.00340276	0.00812543
0.00351339	0.0027924
0.00808728	0.00720226
0.0176699	0.015198
0.00341802	0.00294499
0.0179599	0.0240291
0.0028687	0.00273136
0.012253	0.0113718
0.00285344	0.00267033
0.00296025	0.00276188
0.00294499	0.00288396
0.00267033	0.0113107
0.00289921	0.00282292
0.0028687	0.0027924
0.00346761	0.00416571
0.00562295	0.00508125
0.00268559	0.00274662
0.00434882	0.0033875
0.00268559	0.00256352
0.00318914	0.00811398
0.0164912	0.0160678
0.00316243	0.00350958
0.00793469	0.00446708
0.00294499	0.00292973
0.0027924	0.00276188
0.00294499	0.00276188
0.0028687	0.00277714
0.0296483	0.023373
0.00273136	0.00265507
0.00263981	0.00259403
0.00290684	0.00349432
0.00260929	0.00259403
0.00456245	0.0030518
0.00271611	0.00271611
0.00270085	0.00267033
0.00531014	0.00587472
0.00309758	0.00354009
0.0033875	0.00285344
0.00791562	0.00514229
0.00254063	0.00256352
0.00314336	0.0040322
0.00265507	0.00276188
0.00355535	0.00555047
0.00308232	0.00294499
0.0407759	0.040856
0.0031281	0.00294499
0.00540169	0.00575265
0.00277714	0.0027924
0.00274662	0.00248722
0.00405127	0.00305943
0.00318914	0.00337224
0.00303655	0.00913252
0.00289921	0.00273899
0.00265507	0.00274662
0.00262455	0.00259403
0.00485237	0.00311284
0.00303655	0.00257877
0.00360113	0.00288396
0.00259403	0.00262455
0.0055848	0.00424964
0.00260929	0.00254826
0.00343328	0.00307088
0.00263981	0.00262455
0.0034638	0.00280766
0.00256352	0.00257877
0.0128862	0.012314
0.00285344	0.00273136
0.00262455	0.00256352
0.00306706	0.00282292
0.00395209	0.00341802
0.0083772	0.00460822
0.00265507	0.00267033
0.00274662	0.00276188
0.00424201	0.00354009
0.00434882	0.00347906
0.00294499	0.00291447
0.00270085	0.00265507
0.00988022	0.00425727
0.00270085	0.00315862
0.00463874	0.00349432
0.00552377	0.00350958
0.0027924	0.00289921
0.00260929	0.00260929
0.00783551	0.00370794
0.00325017	0.00383001
0.00483711	0.00367742
0.00254826	0.002533
0.0114443	0.00782788
0.00296025	0.00276188
0.0081178	0.0037995
0.0137751	0.0141909
0.00544747	0.00456245
0.0141566	0.00784314
0.00517281	0.00390631
0.00280766	0.00268559
0.00564584	0.00511177
0.00276188	0.00299077
0.0353094	0.00921645
0.00627146	0.00459297
0.0028687	0.00306706
0.016537	0.0133669
0.00714504	0.00584421
0.00260929	0.00260929
0.0143587	0.0150187
0.00280766	0.00335698
0.00270085	0.00265507
0.00457771	0.0039826
0.0180362	0.00822461
0.00260929	0.00260929
0.00300603	0.00334173
0.00387579	0.00361639
0.00263981	0.00257877
0.00331121	0.00277714
0.00268559	0.00306706
0.00894179	0.00929274
0.00289158	0.00265507
0.007187	0.00697337
0.00274662	0.00285344
0.00262455	0.00332647
0.00254826	0.002533
0.00282292	0.00343328
0.00270085	0.00260929
0.00626764	0.00579843
0.00385672	0.00306706
0.00260929	0.00268559
0.00776684	0.00656138
0.00273136	0.0027924
0.00265507	0.00259403
0.0120089	0.0111543
0.0103456	0.0120851
0.00274662	0.00288396
0.00256352	0.00257877
0.00274662	0.0027924
0.00285344	0.00283818
0.00268559	0.00273136
0.00270085	0.00262455
0.00276188	0.00277714
0.00277714	0.00331121
0.00267033	0.00260929
0.00262455	0.00265507
0.00260929	0.00262455
0.00474556	0.00392157
0.00262455	0.00262455
0.0052491	0.00395209
0.0101472	0.012398
0.00260929	0.00267033
0.00274662	0.00277714
0.00280766	0.00271611
0.00459297	0.00329595
0.00299077	0.00263981
0.00422293	0.00282292
0.00474556	0.00367742
0.00444038	0.00373846
0.0047303	0.00361639
0.00474556	0.00411994
0.00265507	0.00263981
0.00271611	0.0030518
0.0128481	0.0154574
0.00277714	0.00267033
0.0132296	0.0157473
0.0154879	0.0213931
0.013901	0.00750744
0.0107424	0.0104524
0.00601205	0.00515755
0.00273136	0.00480659
0.00276188	0.00267033
0.00263981	0.00257877
0.00270085	0.00260929
0.0144656	0.0122835
0.00427253	0.00321965
0.00984588	0.00674449
0.0123331	0.0143893
0.00289921	0.00297551
0.026978	0.0144503
0.00360876	0.00302129
0.0105898	0.0090486
0.00318914	0.00294499
0.00260929	0.00321965
0.00309758	0.00480659
0.00288396	0.00407416
0.00311284	0.00444038
0.00748455	0.00427253
0.00396735	0.00367742
0.014023	0.0112917
0.00273136	0.00265507
0.014374	0.00733196
0.0323796	0.0111086
0.0151064	0.0160372
0.00466926	0.00401312
0.00273136	0.00271611
0.00263981	0.00262455
0.00270085	0.00271611
0.00267033	0.00265507
0.00515755	0.00407034
0.00708019	0.00448615
0.0273556	0.0145151
0.00267033	0.00262455
0.00256352	0.00257877
0.0108301	0.0129549
0.00274662	0.00328069
0.0027924	0.00267033
0.0111391	0.0102541
0.00265507	0.00263981
0.00657664	0.00755322
0.00262455	0.00259403
0.00363165	0.00294499
0.0258869	0.0165255
0.00260929	0.00262455
0.0149767	0.0204356
0.00285344	0.00277714
0.00474937	0.00376898
0.0165866	0.0108034
0.00263981	0.00260929
0.00315862	0.00302129
0.00994888	0.0126192
0.00571832	0.00596628
0.00299077	0.00283818
0.00273136	0.00289921
0.00259403	0.00262455
0.00276188	0.0027924
0.00332647	0.00608835
0.00263981	0.00260929
0.0155795	0.0129931
0.0096437	0.00801099
0.00292973	0.00277714
0.00415045	0.00347906
0.0175631	0.0210117
0.00793469	0.00677501
0.00448997	0.00366217
0.00364691	0.00282292
0.00329595	0.00285344
0.00257877	0.00263981
0.00273136	0.00268559
0.0170367	0.0218814
0.00318914	0.00445563
0.00273136	0.00270085
0.00265507	0.00259403
0.00254826	0.00257877
0.00424201	0.00339895
0.00292973	0.00285344
0.0108682	0.00616464
0.0040589	0.00553903
0.0139353	0.0142061
0.0118105	0.00978103
0.00401312	0.00318914
0.0117189	0.0176242
0.00476081	0.00390631
0.00415045	0.00386053
0.0305104	0.0157473
0.00719844	0.00463874
0.00271611	0.00297551
0.00991073	0.005066
0.00297551	0.00257877
0.00282292	0.00267033
0.00396735	0.00309758
0.00567636	0.00347906
0.00277714	0.00265507
0.00268559	0.00281147
0.00265507	0.00317388
0.00276951	0.00271611
0.0175021	0.0232586
0.00561913	0.00331121
0.0125124	0.0130007
0.0028687	0.0028687
0.00737011	0.00556573
0.0103304	0.00569162
0.00370794	0.00334173
0.0108797	0.0118563
0.00265507	0.00260929
0.00292973	0.00256352
0.00296025	0.00267033
0.00292973	0.00782406
0.00265507	0.00267033
0.0168002	0.0112535
0.00723278	0.00886549
0.00273136	0.00276188
0.00271611	0.00288396
0.00277714	0.00292973
0.00860609	0.00909438
0.00282292	0.00265507
0.00271611	0.00283818
0.00747692	0.00520333
0.00860609	0.00662242
0.00442512	0.00357061
0.00923171	0.00631724
0.00263981	0.00267033
0.00381476	0.00315862
0.00273136	0.00308614
0.00421149	0.00378424
0.00890745	0.00684367
0.00270085	0.00334173
0.00297551	0.00302129
0.00773632	0.009308
0.0278782	0.0149882
0.0309148	0.00603113
0.00729381	0.00628672
0.00282292	0.00300603
0.0153964	0.0181125
0.00277714	0.00273136
0.00265507	0.00267033
0.00289921	0.00364691
0.0101015	0.0122454
0.00669871	0.00519951
0.00518807	0.00416571
0.00671397	0.0065156
0.00756847	0.005066
0.00296025	0.00344854
0.00263981	0.00265507
0.00555428	0.00390631
0.00672923	0.00587472
0.0111276	0.0106813
0.00268559	0.00315862
0.00290684	0.00282292
0.00740063	0.0100481
0.00374609	0.00634012
0.00321965	0.00300603
0.0125582	0.00898756
0.0028687	0.0027924
0.0068513	0.00575265
0.00288396	0.00323873
0.0108339	0.00775158
0.00854505	0.00901808
0.00321965	0.00311284
0.00856031	0.00877394
0.0027924	0.00328832
0.00410468	0.00354009
0.00306706	0.00276188
0.00296025	0.00277714
0.00267033	0.00259403
0.00256352	0.00265507
0.00347906	0.00447089
0.00538643	0.00369268
0.00972	0.0107385
0.00352483	0.00328069
0.00291447	0.0028687
0.00263981	0.00292973
0.00994507	0.00696193
0.00488289	0.00422675
0.00267033	0.00271611
0.00273136	0.00302129
0.00273136	0.00263981
0.0119669	0.00926223
0.0153086	0.0122377
0.00474556	0.00370794
0.0170748	0.0121729
0.0037995	0.00366217
0.00265507	0.00265507
0.00286488	0.00262455
0.00296025	0.00292973
0.00271611	0.00270085
0.00267033	0.00282292
0.00549325	0.00416571
0.00416571	0.00352483
0.00296025	0.0028687
0.00529488	0.00410468
0.0134241	0.0175097
0.00276188	0.00282673
0.00810254	0.00918593
0.0160754	0.0142061
0.0120546	0.0155642
0.0113375	0.00411994
0.0113375	0.00834669
0.00273136	0.0041352
0.0188678	0.0118715
0.00335698	0.00314336
0.00704967	0.0059968
0.00265507	0.00265507
0.00270085	0.00270085
0.00732815	0.00490959
0.00856031	0.00369268
0.00459297	0.00407416
0.00315862	0.00297551
0.0086099	0.00395209
0.00291447	0.00297551
0.0113375	0.013695
0.00487907	0.00465019
0.00452049	0.00433356
0.0157778	0.0150645
0.00260929	0.00260929
0.00297551	0.0047837
0.00344854	0.00306706
0.0028687	0.00288396
0.00485237	0.00328069
0.0256046	0.0124323
0.00318914	0.00427253
0.00888075	0.00497444
0.00440986	0.00363165
0.00362783	0.00370794
0.00289921	0.00376898
0.0121881	0.0133211
0.00700389	0.00742733
0.00260929	0.00257877
0.00271611	0.00270085
0.00266651	0.00273136
0.0101053	0.0135615
0.00497444	0.00448615
0.00556954	0.0037995
0.0095903	0.00387579
0.0030518	0.00331121
0.00781262	0.00564202
0.0163844	0.00985733
0.00303655	0.00297551
0.00267033	0.00357061
0.00283818	0.00288396
0.0162356	0.0271077
0.00283818	0.00321965
0.0031281	0.00691234
0.00317388	0.00291447
0.011429	0.0115206
0.00271611	0.00270085
0.00260929	0.00260929
0.00723278	0.0071107
0.0108949	0.0112612
0.00349432	0.00402838
0.00271611	0.00268559
0.0250858	0.0125658
0.00268559	0.00270085
0.00265507	0.00263981
0.0047303	0.00654612
0.00480659	0.00393683
0.00289921	0.00283818
0.00781262	0.00454719
0.0263371	0.0146868
0.0031281	0.0030518
0.0152438	0.0137789
0.0119783	0.0128214
0.0123293	0.0156214
0.0028687	0.00271611
0.00483711	0.00425727
0.00280766	0.00267033
0.00436408	0.0037995
0.00308232	0.00296025
0.00355535	0.00628672
0.00350195	0.0125505
0.00707637	0.0057145
0.00282292	0.00436408
0.0120089	0.0121004
0.00482185	0.00442512
0.00428779	0.00332647
0.00302129	0.00347906
0.00753796	0.00531014
0.0028687	0.0027924
0.0087129	0.0125696
0.00495918	0.00422675
0.00265507	0.00267033
0.00595102	0.00376898
0.00265507	0.00268559
0.00556954	0.00511177
0.00292973	0.0031281
0.00268559	0.00267796
0.0028687	0.00270085
0.00364691	0.00380331
0.0172808	0.0239719
0.00492866	0.00430304
0.00366217	0.0039559
0.00262455	0.00262455
0.00271611	0.00270085
0.0110475	0.0138705
0.0174563	0.0252232
0.0149004	0.0157626
0.0104067	0.00915923
0.00466926	0.00454719
0.00296025	0.00265507
0.00283818	0.00267033
0.00593576	0.00440986
0.00260929	0.00268559
0.00299077	0.00296025
0.0207828	0.0171626
0.00271611	0.00270085
0.00273136	0.00273136
0.00849927	0.0131685
0.00582895	0.00508125
0.00347906	0.00732052
0.00292973	0.00270085
0.00516136	0.00488289
0.00283818	0.00306706
0.00615702	0.00375372
0.00282292	0.00371939
0.0144045	0.00812161
0.00469978	0.00364691
0.00296025	0.00334173
0.00276188	0.00274662
0.00657664	0.00350958
0.00270085	0.00267033
0.00740063	0.0103571
0.0100023	0.00984207
0.0106355	0.00735485
0.00260929	0.00259403
0.002533	0.00259403
0.00273136	0.00320821
0.00791943	0.00526436
0.00280766	0.00273136
0.0028687	0.00309758
0.00404364	0.00504692
0.0155489	0.018864
0.0168193	0.0181582
0.00983825	0.0134813
0.00267033	0.00260929
0.0117189	0.011635
0.00291447	0.0028687
0.00257877	0.002533
0.00277333	0.00271611
0.00276188	0.00328069
0.00355917	0.00302129
0.00268559	0.00265507
0.00922408	0.00636301
0.00274662	0.00265507
0.00343328	0.00277714
0.00445563	0.00349432
0.00311284	0.0131609
0.0131533	0.0175631
0.00604257	0.00567636
0.0028687	0.00265507
0.00257877	0.00267033
0.00598154	0.00433356
0.00686656	0.0078851
0.00444038	0.00306706
0.00276188	0.00289921
0.00270085	0.00270085
0.00767529	0.00553903
0.0192493	0.00915541
0.0167544	0.0308537
0.00288396	0.00276188
0.0136988	0.0146563
0.00308232	0.00317006
0.0134203	0.00579843
0.019604	0.0246929
0.00283818	0.00285725
0.0125582	0.00927749
0.00425727	0.00363165
0.00268559	0.00276188
0.00379568	0.00332647
0.0111086	0.00848402
0.0190814	0.0209049
0.01178	0.0124819
0.00418097	0.00595102
0.00790417	0.010811
0.0130388	0.00940337
0.00297551	0.0027924
0.00289921	0.00294499
0.00378424	0.00352483
0.00308232	0.00457771
0.00268559	0.00268559
0.00297551	0.00282292
0.00277714	0.00318914
0.00949111	0.00723278
0.00265507	0.00267033
0.015198	0.0184558
0.0027924	0.0034638
0.00280766	0.00331121
0.0119478	0.0103151
0.0153124	0.0210346
0.00784314	0.00634394
0.00358206	0.00530632
0.00268559	0.00276188
0.00608835	0.0049897
0.00299077	0.00277714
0.00265507	0.00267033
0.00283818	0.00421149
0.00268559	0.00260929
0.00369268	0.00317388
0.00454719	0.0040589
0.0137484	0.0203288
0.0128023	0.0121614
0.00282292	0.00262455
0.00263981	0.00265507
0.00646983	0.00321584
0.0156634	0.0244602
0.00291447	0.00283818
0.00323491	0.00335698
0.0047303	0.00407034
0.011902	0.0133898
0.00317388	0.00271611
0.00296025	0.00294499
0.0052491	0.00347906
0.0093843	0.0112001
0.00277714	0.00300603
0.00374609	0.00306706
0.00267033	0.00416953
0.0074464	0.00463874
0.00267033	0.00263981
0.00289921	0.00270085
0.00347524	0.00541695
0.00538643	0.00770199
0.00366217	0.00328069
0.00288396	0.00328069
0.00626001	0.00487907
0.0214771	0.0174449
0.0176623	0.0216754
0.00396735	0.00695048
0.00337224	0.00544747
0.026154	0.0163806
0.0043183	0.00347906
0.00367742	0.00470741
0.00296025	0.0057641
0.0030518	0.00292973
0.00412757	0.00347906
0.00251392	0.00251774
0.00753414	0.00941482
0.00370031	0.00798047
0.00762951	0.00727855
0.00655756	0.00459297
0.00794995	0.00694286
0.0145418	0.0159762
0.00314336	0.00301366
0.0115511	0.0126802
0.00269703	0.00256352
0.00315862	0.00276188
0.00389105	0.00341802
0.00358587	0.00415045
0.00622568	0.00656138
0.00320439	0.00297551
0.00265507	0.00306706
0.013077	0.0141909
0.00259403	0.00257877
0.00537881	0.00358587
0.0157931	0.0186923
0.00273136	0.00283818
0.0165103	0.0218357
0.00659953	0.00375372
0.00302129	0.00280766
0.00297551	0.00366217
0.00270085	0.00270085
0.00278096	0.00314336
0.0052491	0.00418479
0.00412757	0.00314336
0.0152819	0.0145762
0.00326543	0.00317388
0.00296025	0.00393683
0.00314336	0.00353246
0.00296025	0.0031281
0.00306706	0.0027924
0.00267033	0.00267033
0.00779736	0.00476081
0.00259403	0.00256352
0.0168536	0.0123407
0.00308232	0.00318914
0.00503548	0.00339132
0.00914778	0.00416571
0.00262455	0.00263981
0.00404364	0.00542458
0.0037232	0.00421149
0.00360113	0.004654
0.0133707	0.00769055
0.00297551	0.00299077
0.00328069	0.0062562
0.00894179	0.0106355
0.00597391	0.00410849
0.00318914	0.00288396
0.00328069	0.00442893
0.00502022	0.00389105
0.00299077	0.00332647
0.012604	0.0131075
0.00280766	0.00271611
0.00502022	0.00422675
0.0170138	0.0179141
0.0183566	0.0156558
0.0286603	0.030415
0.00500877	0.00328069
0.00460822	0.00389105
0.0102693	0.0106775
0.0030518	0.00329595
0.00339132	0.00415045
0.00767529	0.00567636
0.00314336	0.00296025
0.00299077	0.00288396
0.00326543	0.00332647
0.00283818	0.00285344
0.0188296	0.0160372
0.00378424	0.0032578
0.00285344	0.0027924
0.00427253	0.0039826
0.00419623	0.00329595
0.00297551	0.00299077
0.0238346	0.0047303
0.0103456	0.0158198
0.0028687	0.0031281
0.00387579	0.00479133
0.00285344	0.00308614
0.0111696	0.00993362
0.00753796	0.00412375
0.00309758	0.00297551
0.0162547	0.00769055
0.00288396	0.00268559
0.00843824	0.00716411
0.00288396	0.00294881
0.00274662	0.00268559
0.00267033	0.00263981
0.00318914	0.00302129
0.00595865	0.0148165
0.004654	0.00394446
0.0284962	0.0239414
0.00294499	0.00331121
0.00308232	0.0030518
0.00291447	0.00332647
0.0055848	0.00580224
0.00565347	0.0142596
0.00320439	0.00314336
0.0033875	0.00735485
0.0108644	0.0101015
0.00763333	0.00680552
0.0028687	0.00277714
0.00323873	0.00649271
0.00297551	0.00291447
0.00315862	0.00320439
0.00291447	0.00358968
0.00303655	0.00326543
0.00285344	0.0027924
0.00499352	0.00344854
0.0155833	0.0186847
0.0028687	0.00273136
0.00764096	0.00518044
0.00331121	0.00343328
0.00343328	0.00276188
0.00999466	0.00933852
0.00362402	0.00945678
0.0041352	0.00335698
0.00997559	0.00630579
0.00567636	0.0116732
0.00280766	0.00294118
0.035275	0.0365759
0.00433356	0.00512703
0.00271611	0.0028687
0.0119478	0.00798047
0.00712596	0.00905623
0.00306706	0.00358587
0.00318914	0.00317388
0.00682078	0.00477226
0.00341421	0.00314336
0.0124971	0.0158007
0.00384527	0.00299077
0.00987259	0.00554665
0.0029221	0.00288396
0.00300603	0.00296025
0.00772869	0.0163729
0.00314336	0.00315862
0.00262455	0.00262455
0.00307088	0.00332647
0.00293736	0.00288396
0.0339055	0.0212787
0.00585183	0.0136835
0.0130007	0.0146792
0.0120241	0.0115129
0.00285725	0.00302129
0.00286107	0.00271611
0.00276188	0.00271611
0.0247349	0.0343175
0.0133555	0.0176089
0.00334173	0.00323491
0.00663767	0.00468452
0.0218814	0.0203021
0.00273136	0.00276188
0.0051194	0.00578317
0.00440986	0.00624475
0.00627146	0.00653468
0.00263218	0.00257877
0.00273518	0.00263981
0.00610361	0.00617227
0.00527962	0.00566873
0.0124361	0.0124361
0.00352483	0.00289921
0.00265507	0.00262455
0.00892653	0.00817884
0.00259403	0.00263981
0.00458152	0.00331121
0.00280766	0.00274662
0.00274662	0.00247196
0.00634775	0.00503548
0.0077821	0.00741588
0.00267033	0.00263981
0.00300603	0.00280766
0.00280766	0.00276188
0.0047303	0.00318914
0.00274662	0.00291447
0.00265507	0.00259403
0.00268559	0.00309758
0.00452811	0.00364691
0.00341802	0.00282292
0.00910201	0.00821317
0.00271611	0.00259403
0.00852979	0.00686656
0.00268559	0.00268559
0.0128634	0.0143931
0.00299077	0.0030518
0.00273136	0.00271611
0.00819409	0.0083772
0.00259403	0.00251774
0.00274662	0.00274662
0.00283818	0.00280766
0.0031281	0.00268559
0.00660716	0.00610361
0.00270085	0.002533
0.00958648	0.00860609
0.00267033	0.00274662
0.00283818	0.00344854
0.00607309	0.00553903
0.0116884	0.0122072
0.00270085	0.00299458
0.00447089	0.00350958
0.00357061	0.00265507
0.00265507	0.00260929
0.0133211	0.00582895
0.0196651	0.0182765
0.0027924	0.00302129
0.0027924	0.00280766
0.00462348	0.00332647
0.00283818	0.00311284
0.0106737	0.00537118
0.00584421	0.00492866
0.0214694	0.0144388
0.00280766	0.00294499
0.00268559	0.00254826
0.00277714	0.00294499
0.00276188	0.00274662
0.0155985	0.0121004
0.00923934	0.0137789
0.00712596	0.00605783
0.00273136	0.00334173
0.00271611	0.00273136
0.00846494	0.00483711
0.0182803	0.0194438
0.00851453	0.00302129
0.0148928	0.0161631
0.00259403	0.00267033
0.0234379	0.0223926
0.0159075	0.0146944
0.00262455	0.00325017
0.0139315	0.0153353
0.0141604	0.00876249
0.00251774	0.00256352
0.00593576	0.00389105
0.00270085	0.00271611
0.00389105	0.00325017
0.00291447	0.00268559
0.00285344	0.00713359
0.00268559	0.00265507
0.00292973	0.00376135
0.00282292	0.00279622
0.00282292	0.0027924
0.00492866	0.004654
0.00703441	0.00646983
0.00277714	0.00288396
0.00276188	0.00303655
0.026112	0.00872816
0.0145418	0.0149538
0.00309758	0.00268559
0.00263981	0.00262455
0.0221103	0.00790417
0.00276188	0.00285344
0.00422675	0.00344854
0.0186389	0.0138018
0.00288396	0.00601205
0.00280766	0.00270085
0.0052491	0.00407416
0.00285344	0.00259403
0.00410468	0.00300603
0.00282292	0.0042153
0.017113	0.0121233
0.00271611	0.00267033
0.00923171	0.00955215
0.0134432	0.0119783
0.00526436	0.00407416
0.00309758	0.0068513
0.00271611	0.00277714
0.00375372	0.00355535
0.0140497	0.0178149
0.00274662	0.0027924
0.00305943	0.00273136
0.00433356	0.00486763
0.00628672	0.00537118
0.0229496	0.0240711
0.00270085	0.0027924
0.00648508	0.00598535
0.00429923	0.00410468
0.00289921	0.00288396
0.00349432	0.0028687
0.00297551	0.00360113
0.00267033	0.00267033
0.00311284	0.00271611
0.00288396	0.00301747
0.00604257	0.00384527
0.0207218	0.0187533
0.00271611	0.00270085
0.0133516	0.0150416
0.00267033	0.00292973
0.00901808	0.00888075
0.0027924	0.00333028
0.00277714	0.00302129
0.00886549	0.0136034
0.00271611	0.0027924
0.00437934	0.00270085
0.00420386	0.00493629
0.00274662	0.00274662
0.00830091	0.00634775
0.00914778	0.00869764
0.00267033	0.00268559
0.00265507	0.00276188
0.0109293	0.00931945
0.00271611	0.00277714
0.00270085	0.00271611
0.00306706	0.00282292
0.00328069	0.0028687
0.0034638	0.00317388
0.00280766	0.00327687
0.0250095	0.0134012
0.00263981	0.00259403
0.00315862	0.00265507
0.00303655	0.00282292
0.00276188	0.00276188
0.0166896	0.0102083
0.00643931	0.00531395
0.0128481	0.00667582
0.00518807	0.0040589
0.00283818	0.00289921
0.00367742	0.00318914
0.0192874	0.0202258
0.009514	0.0155489
0.0173724	0.0124666
0.00534829	0.00417334
0.0076791	0.00425727
0.00640879	0.005066
0.0129549	0.0121462
0.00775158	0.0099031
0.00448615	0.00340276
0.00267033	0.00260929
0.00306706	0.00309758
0.00267033	0.00268559
0.0164569	0.0143282
0.0138819	0.0142748
0.0100404	0.00810254
0.00263981	0.00270085
0.00448615	0.00422675
0.00277714	0.00317388
0.0209506	0.0149538
0.00280766	0.00283818
0.00308995	0.00260929
0.00273136	0.00300603
0.00274662	0.00294499
0.00292973	0.00288396
0.00271611	0.00282292
0.00354009	0.00283818
0.00263981	0.00265507
0.00988022	0.00463874
0.0161059	0.0178683
0.0162051	0.0173915
0.00314336	0.00318914
0.0027924	0.00282292
0.00315862	0.00271611
0.00262455	0.00267033
0.00839246	0.00587472
0.014023	0.0151217
0.00318914	0.0034638
0.0027924	0.00262074
0.00807202	0.00543984
0.00317388	0.00297551
0.00335698	0.00325017
0.00270085	0.00262455
0.00933852	0.00973526
0.00920119	0.00972
0.00375372	0.00294499
0.0031281	0.00280766
0.00756847	0.00513848
0.00545129	0.00486763
0.00276188	0.00260929
0.0112688	0.00979248
0.00665675	0.00735485
0.00288396	0.00456245
0.00280766	0.00457771
0.00810254	0.00750744
0.00360113	0.00296025
0.00602731	0.00482185
0.00364691	0.00408942
0.00285344	0.00334173
0.00352483	0.00329595
0.00462348	0.00328069
0.0104829	0.0112764
0.0185397	0.00946059
0.00317388	0.00327687
0.0140154	0.00813687
0.00276951	0.00371557
0.00460822	0.00360113
0.00271611	0.00276188
0.0349889	0.0237316
0.0177729	0.0171664
0.0157664	0.0177768
0.0154345	0.00907912
0.00318914	0.0031281
0.00302129	0.00276188
0.00291447	0.00371176
0.0173304	0.0159304
0.0210498	0.013283
0.0129129	0.0190089
0.0181735	0.00799191
0.00288396	0.00321965
0.0149844	0.0108263
0.0178607	0.0105745
0.0028687	0.0031014
0.00729381	0.00704967
0.0114481	0.00819409
0.0106813	0.00962844
0.0103265	0.00874342
0.00283818	0.0030518
0.00315862	0.00285344
0.00866331	0.0108186
0.0031548	0.00354009
0.00495537	0.00343328
0.00270085	0.00273136
0.00325017	0.00311284
0.014477	0.00852979
0.00378042	0.00311284
0.00271611	0.00276188
0.0313268	0.0124514
0.0096437	0.00839246
0.00270085	0.00274662
0.0111276	0.0156939
0.00309758	0.00283818
0.0217632	0.0195163
0.00273136	0.00260929
0.0179599	0.0166323
0.00771725	0.00492866
0.0180743	0.0192912
0.00297551	0.00309758
0.0110628	0.0104982
0.00830091	0.00636301
0.00334173	0.0028687
0.00276188	0.0027924
0.00570687	0.00440986
0.0027924	0.00307088
0.00321965	0.0027924
0.00358587	0.00314336
0.00326543	0.0043946
0.00274662	0.00284199
0.00939956	0.00798428
0.00292973	0.00274662
0.0093843	0.00611887
0.014332	0.0174601
0.0034638	0.00321965
0.00323491	0.00307851
0.00407416	0.00334173
0.00350958	0.00285344
0.0101816	0.00320439
0.00263981	0.00271611
0.00943771	0.00819409
0.00282292	0.00297551
0.00296025	0.00319295
0.00328069	0.00726329
0.0113184	0.0109407
0.00282292	0.00291447
0.00978103	0.00605783
0.00302129	0.00308232
0.00314336	0.00852979
0.0117418	0.0151217
0.00265507	0.00271611
0.00291447	0.0027924
0.00515755	0.00289921
0.00273136	0.00271611
0.00309758	0.00299077
0.00980011	0.0117838
0.00268559	0.00265507
0.00667201	0.00476844
0.00314336	0.00308232
0.0057145	0.00331121
0.0196765	0.0222782
0.00320821	0.00288396
0.00880446	0.00952926
0.00276188	0.00282292
0.00268559	0.00271611
0.00294499	0.00699626
0.00273136	0.00277714
0.00265507	0.00271611
0.00595102	0.00573739
0.0144732	0.00492866
0.00799573	0.00680552
0.0130007	0.0109865
0.00340276	0.00300603
0.0093843	0.0166018
0.0132601	0.0129702
0.00852979	0.00794995
0.00708019	0.00517281
0.00687419	0.00523384
0.00494392	0.00381476
0.013901	0.0178302
0.00794995	0.00706493
0.0119173	0.00868238
0.0141756	0.0137789
0.00727474	0.00989548
0.00280766	0.00271611
0.0108835	0.0115358
0.00285344	0.00284199
0.0131838	0.0157092
0.00267033	0.00296025
0.00620661	0.00559243
0.00271611	0.00299077
0.00312428	0.00303655
0.00276188	0.00308232
0.0219234	0.013386
0.00415045	0.00314336
0.0176089	0.0205158
0.0102693	0.0100252
0.0112192	0.00849927
0.009823	0.0139658
0.0131533	0.0155528
0.0197528	0.0100099
0.00585565	0.00508125
0.0124056	0.00962844
0.00311284	0.00306706
0.0114595	0.0133059
0.0028687	0.00328069
0.00267033	0.00265507
0.00283818	0.00274662
0.0028687	0.00277714
0.0132677	0.00978103
0.0134737	0.016495
0.0153773	0.00632105
0.00601205	0.00479133
0.0166323	0.0151217
0.00567636	0.00436408
0.0027924	0.00285344
0.00271611	0.00280766
0.0166094	0.0210956
0.0138933	0.012253
0.0104601	0.0136568
0.00394446	0.00350576
0.00274662	0.00288396
0.00917067	0.00946059
0.00282292	0.0028687
0.00297551	0.00277714
0.0111467	0.00880446
0.0149081	0.0173953
0.00297551	0.00297551
0.0233616	0.0248722
0.00326543	0.00323491
0.00611887	0.00582895
0.00477607	0.00350958
0.032639	0.0166629
0.00329595	0.00374228
0.0158923	0.00546654
0.00262455	0.00273136
0.00541695	0.00523384
0.00740063	0.0041352
0.0519875	0.0194057
0.0103151	0.00843442
0.0028687	0.00270085
0.00320439	0.00296025
0.00320439	0.0028687
0.00512703	0.00302129
0.0030518	0.00289921
0.0116426	0.0077821
0.0205806	0.0143435
0.00276188	0.00422675
0.00639734	0.0075227
0.00294499	0.00337224
0.0111505	0.00765621
0.0043946	0.00375372
0.00288396	0.00320439
0.00267033	0.00257877
0.00930037	0.00511177
0.0189174	0.0222705
0.0128099	0.0157092
0.00300603	0.00316625
0.00595483	0.00364691
0.0179599	0.0145113
0.0109789	0.0104829
0.0365644	0.0534295
0.00283818	0.0046006
0.00369268	0.00387198
0.00421149	0.00395209
0.00299077	0.00270085
0.0109102	0.00885023
0.00488289	0.0056611
0.0137636	0.00843824
0.0120661	0.00503548
0.00262455	0.00259403
0.00303655	0.00309758
0.0148089	0.0134127
0.00321965	0.00464256
0.00357061	0.00365835
0.00547799	0.00474174
0.00326543	0.00377279
0.00960174	0.00800336
0.0134279	0.0120699
0.00497444	0.00762188
0.0109789	0.00669871
0.00999466	0.0152285
0.0125238	0.0162737
0.0122072	0.0124743
0.0148928	0.00907912
0.00331121	0.00315862
0.00296025	0.00303655
0.0081178	0.00869764
0.00427253	0.00292973
0.00737392	0.0054818
0.00396735	0.00393683
0.00979629	0.00563821
0.00329595	0.00405509
0.00373465	0.00786603
0.00291447	0.0027924
0.0175364	0.0171817
0.00331121	0.00285344
0.0031281	0.00292973
0.00299077	0.00277714
0.0162776	0.0118257
0.00311666	0.00285344
0.00375372	0.00674449
0.0065919	0.00628672
0.00311284	0.00733959
0.00747692	0.00647745
0.00277714	0.00288396
0.0113985	0.010132
0.00328069	0.00350958
0.00321965	0.00299077
0.0118257	0.0104791
0.00280766	0.00288396
0.0037232	0.00466926
0.00357824	0.00347906
0.00517662	0.00343328
0.00405127	0.00291447
0.00303655	0.00712215
0.00508125	0.00489433
0.00271611	0.00274662
0.00306706	0.00321965
0.00689708	0.00603876
0.0033875	0.00311284
0.0143626	0.0140688
0.00282292	0.00277714
0.00701915	0.00726329
0.00357061	0.00315862
0.0204166	0.0214237
0.00608835	0.00404364
0.00318914	0.00272374
0.0030518	0.00282292
0.00276188	0.00288396
0.00355535	0.00317388
0.00265507	0.0027924
0.00299077	0.0033875
0.00277714	0.00280766
0.00434882	0.0046006
0.00325017	0.00687419
0.0043946	0.00399786
0.0157092	0.0144198
0.0030518	0.00381476
0.00482185	0.0037232
0.00267033	0.00273136
0.0194095	0.0141909
0.00282292	0.00282292
0.00294499	0.00309758
0.00260929	0.00260929
0.00291447	0.00359731
0.00267033	0.00265507
0.00277714	0.00306706
0.0153277	0.0131647
0.0134623	0.0190585
0.00366217	0.00317388
0.00291447	0.00323491
0.00270085	0.00271611
0.00273136	0.00276188
0.00783551	0.00776684
0.00285344	0.00277714
0.00271611	0.00274662
0.0399863	0.0196689
0.0162203	0.0239147
0.00378424	0.00334173
0.00881972	0.00677882
0.00326543	0.0041352
0.0138323	0.0126574
0.00921645	0.00985733
0.00314336	0.0030251
0.00267033	0.00296025
0.00603876	0.00299077
0.0146868	0.0190509
0.0315213	0.0380064
0.0158083	0.00970474
0.015259	0.0195773
0.0180056	0.0176547
0.00632105	0.00511177
0.00700389	0.00392157
0.00273136	0.00273136
0.0368582	0.0314488
0.00695811	0.00387579
0.0080148	0.00704967
0.0120851	0.0141451
0.00292973	0.00285344
0.0146944	0.0178454
0.00759899	0.0059205
0.00561532	0.00649271
0.00535592	0.00460822
0.00325017	0.00311284
0.0053254	0.0047303
0.00265507	0.00268559
0.00277714	0.0027924
0.00888075	0.00803769
0.00619516	0.00526436
0.0125887	0.0168765
0.0074464	0.00529488
0.00276188	0.00292973
0.00777447	0.0037995
0.00483711	0.00309758
0.00283818	0.00321965
0.0032578	0.00366217
0.00331121	0.00306706
0.0173457	0.0179637
0.00893034	0.00502022
0.00271229	0.00271611
0.00308232	0.0031281
0.0424239	0.040692
0.00544747	0.0028687
0.00750744	0.00613413
0.0033875	0.00316243
0.0276799	0.0314183
0.0124323	0.0116693
0.0228275	0.00357061
0.00267033	0.00263981
0.0027924	0.00271611
0.00332647	0.0039826
0.00889601	0.00943008
0.0090219	0.0031281
0.00540169	0.00498589
0.00347906	0.00297551
0.00322347	0.00288396
0.00840772	0.00918593
0.0331121	0.0208362
0.0030518	0.0037232
0.00283818	0.00427634
0.00642405	0.00433356
0.00980774	0.0157321
0.0107729	0.00345617
0.00280766	0.00288396
0.00647364	0.00397879
0.00758373	0.0101511
0.00315862	0.00414282
0.00265507	0.00270085
0.00700389	0.00723278
0.0028687	0.00276188
0.0201572	0.0260967
0.00677501	0.0039826
0.0168612	0.0117685
0.00428779	0.00349432
0.00300603	0.00291447
0.00315862	0.00370794
0.00952926	0.0134203
0.00331121	0.00350958
0.0410773	0.0282788
0.00291447	0.00337606
0.0235523	0.0343786
0.012604	0.0160945
0.00364691	0.0079881
0.00444038	0.00318914
0.00297551	0.00288396
0.00308232	0.00289921
0.0200656	0.0219883
0.00957122	0.0110056
0.00344854	0.00328069
0.00883497	0.00476081
0.00974289	0.00926223
0.0127375	0.0122911
0.00354009	0.0030518
0.00619898	0.00436408
0.012047	0.0152438
0.00864424	0.00932326
0.0276493	0.042977
0.00457771	0.00360113
0.0031281	0.0032311
0.00415045	0.00419623
0.00675975	0.00540169
0.00299077	0.0028687
0.00775158	0.00723278
0.00383001	0.00511177
0.00303655	0.00289921
0.00311284	0.00383001
0.00294499	0.00282292
0.00337224	0.0030518
0.00299077	0.00300603
0.00376898	0.00428016
0.00276188	0.00273136
0.0227207	0.0146334
0.00300603	0.00306706
0.00260929	0.00265507
0.00312047	0.00300603
0.0115053	0.00828183
0.0028687	0.00267033
0.0315709	0.0120317
0.0142977	0.00672923
0.00378424	0.0033875
0.00494392	0.00337224
0.00781262	0.00518807
0.00781262	0.00986877
0.00291447	0.0027924
0.00466163	0.00641642
0.0111734	0.0122568
0.00541695	0.00623331
0.00329595	0.00308232
0.00267033	0.00267033
0.00689326	0.00547799
0.00309758	0.00487526
0.0039292	0.00723659
0.0031281	0.00308232
0.00262455	0.00268559
0.00679408	0.00399786
0.0173381	0.0131762
0.00525292	0.00508507
0.00306706	0.00321965
0.00289921	0.00325017
0.00276188	0.00288396
0.027451	0.0191348
0.00443656	0.00301747
0.00278096	0.00283818
0.00341802	0.00348669
0.00299077	0.00262455
0.0101778	0.00601968
0.00544747	0.00991836
0.00428779	0.00349432
0.00577173	0.00535592
0.00296025	0.0030518
0.00993362	0.00863661
0.00288396	0.00285344
0.0258335	0.0209354
0.00321965	0.0030518
0.00300603	0.00286488
0.0124399	0.0130922
0.00567636	0.0122148
0.00311284	0.00300603
0.00323491	0.0030518
0.00522622	0.00819791
0.00396735	0.00469215
0.0624857	0.0624857
0.00375372	0.00383001
0.00367742	0.00593576
0.0146181	0.0225757
0.00885023	0.0042153
0.00901427	0.00914015
0.0399329	0.041989
0.00306706	0.00263981
0.00924697	0.00646601
0.0107729	0.0139506
0.0264591	0.0213931
0.00457771	0.0051957
0.00387579	0.00548562
0.00406653	0.00463874
0.00621424	0.00585946
0.00968948	0.0126879
0.00285344	0.00293736
0.00393683	0.00888075
0.0185473	0.0110285
0.0228809	0.0193523
0.0065156	0.00432975
0.00914397	0.00846876
0.00335698	0.00335698
0.00248722	0.00250248
0.0197986	0.00972
0.00300603	0.00291447
0.00827039	0.0113832
0.00285344	0.00285344
0.00280385	0.00279622

## Sheet: K140A-T141A
Nucleus	Cytoplasm	Fluorescence Intensity	Figure 8d
0.00973526	0.00921645
0.00569162	0.00344854	A: Protein in Nucleus
0.00906386	0.00393683	B: Protein in Cytoplasm
0.0102998	0.00402838
0.00260929	0.00259403
0.00607309	0.00341802
0.00589761	0.00373846
0.00831617	0.00401312
0.00250248	0.0024567
0.00660716	0.00384527
0.00741588	0.00393683
0.00303655	0.00263981
0.00251774	0.00247196
0.0101625	0.00415045
0.00643931	0.00350958
0.00248722	0.00242618
0.00285344	0.0024567
0.00812543	0.0037995
0.002533	0.00238041
0.00248722	0.0024567
0.00257877	0.0024567
0.00256352	0.00247196
0.00257877	0.0024567
0.00514229	0.00349432
0.00267033	0.00250248
0.00250248	0.00247196
0.00607309	0.00393683
0.00602731	0.00390631
0.00344854	0.0027924
0.00267033	0.00251774
0.00585946	0.00344854
0.00317388	0.00265507
0.00668345	0.00422675
0.00779736	0.00311284
0.00323491	0.00273136
0.00709545	0.00415045
0.00628672	0.00497444
0.007187	0.0043183
0.00267033	0.00248722
0.00259403	0.00250248
0.00355535	0.00241093
0.00270085	0.002533
0.00269322	0.00242618
0.00759899	0.00328069
0.00291447	0.00250248
0.00274662	0.00263981
0.00569162	0.00335698
0.00347906	0.00263981
0.00257877	0.00244144
0.00639353	0.00361639
0.00300603	0.00257877
0.00250248	0.0024567
0.00749981	0.00613413
0.00262455	0.00247196
0.00408942	0.00334173
0.00590524	0.00415045
0.00720226	0.00335698
0.00494011	0.00291447
0.00632105	0.00345998
0.00583658	0.0030518
0.002533	0.00251774
0.00289158	0.00248722
0.00735103	0.00360113
0.00471504	0.00303655
0.00700008	0.00442512
0.00415045	0.00277714
0.00819409	0.00511559
0.002533	0.0024567
0.00460822	0.00311284
0.00254826	0.00248722
0.00434882	0.00291447
0.00303655	0.00271611
0.00254826	0.00244144
0.00265507	0.00251774
0.0071107	0.00396353
0.00268559	0.00234989
0.00462348	0.00335698
0.00488289	0.00417334
0.00248722	0.0024567
0.00282292	0.00275044
0.0027924	0.00242618
0.00669871	0.00347906
0.0071107	0.00418097
0.00637827	0.00375372
0.0040589	0.00311284
0.00483711	0.00340276
0.0061799	0.0040589
0.00751888	0.00434882
0.00602731	0.00444038
0.002533	0.00238041
0.00864805	0.0047303
0.006878	0.00415045
0.00549325	0.00498207
0.00666819	0.00500496
0.00303655	0.00273136
0.00798047	0.00318914
0.00280766	0.00259403
0.00709545	0.00381857
0.00776684	0.00389105
0.00347906	0.00326543
0.00447089	0.00294499
0.0028687	0.00256352
0.00700389	0.0043183
0.00573739	0.00337224
0.00267033	0.00254826
0.00262455	0.00250248
0.00584421	0.00440986
0.002533	0.00271611
0.00846113	0.0037995
0.00303655	0.00234989
0.00260929	0.00268559
0.00681697	0.00415045
0.00256352	0.00241093
0.00480659	0.00300603
0.00640879	0.00366598
0.00653086	0.00459297
0.00344854	0.00285344
0.00291447	0.002533
0.00303655	0.00248722
0.00982681	0.00622568
0.00727855	0.00396735
0.00256352	0.0028687
0.00254826	0.00248341
0.00578317	0.0028687
0.00632868	0.0030518
0.00254826	0.00248722
0.00549325	0.00390249
0.00384527	0.00309758
0.00268559	0.00248722
0.00259403	0.00247196
0.00753796	0.00485237
0.00247196	0.0024567
0.00791943	0.00311284
0.00254826	0.00251774
0.00450141	0.00323491
0.00265507	0.00250248
0.0125582	0.00633249
0.00282292	0.00250248
0.0059968	0.0040589
0.00254826	0.00251774
0.00254826	0.002533
0.00256352	0.00250248
0.00306706	0.00265507
0.00313191	0.00257877
0.00607309	0.00341802
0.00492866	0.00306706
0.002533	0.00247196
0.00256352	0.00248722
0.00779736	0.00476081
0.00645457	0.00363165
0.00668727	0.0065919
0.0031281	0.0027924
0.00853361	0.00440986
0.00251774	0.00244144
0.00427253	0.00303655
0.00280766	0.00257877
0.0027924	0.00257877
0.00929274	0.00593576
0.00247196	0.00247196
0.00260929	0.002533
0.0043946	0.00343328
0.00271611	0.002533
0.0052491	0.00354009
0.00804532	0.00418097
0.00743114	0.00349432
0.00863661	0.00619516
0.00361639	0.00276188
0.0105135	0.00610361
0.00759899	0.00639353
0.00281147	0.00248722
0.0024567	0.00242618
0.00276188	0.00267033
0.00406653	0.0033875
0.0070573	0.00610361
0.00256352	0.0024567
0.00280766	0.0024567
0.00985733	0.00311666
0.00614939	0.00535592
0.00247196	0.00244144
0.00260929	0.00267033
0.00250248	0.00248722
0.00248722	0.00244144
0.00320439	0.00282292
0.00976577	0.0039826
0.00259403	0.00256352
0.00325017	0.0031281
0.00745022	0.0040589
0.00671397	0.00581369
0.00436408	0.00318914
0.00508125	0.00354009
0.00366217	0.00257877
0.00273136	0.0024567
0.00383001	0.00308232
0.00254826	0.00250248
0.00666819	0.00355535
0.002533	0.00250248
0.00482185	0.00317388
0.00273136	0.00259403
0.0068513	0.00387198
0.00570687	0.00291447
0.00395972	0.00294499
0.00259403	0.00254826
0.00679026	0.00495918
0.00268559	0.00268559
0.00268559	0.00260929
0.00309758	0.00251774
0.00267033	0.00273136
0.00363165	0.00267033
0.00468452	0.00378805
0.00422675	0.0031281
0.00827039	0.00445563
0.0111238	0.00927749
0.00630198	0.0040589
0.00640879	0.00328069
0.00700389	0.00427253
0.00265507	0.00262455
0.00277714	0.00234989
0.00248722	0.00244144
0.00262455	0.00265507
0.00256352	0.00247196
0.00262455	0.00248722
0.0071107	0.00442512
0.00631724	0.00512322
0.00785077	0.00489815
0.00283818	0.00276188
0.00537118	0.00358587
0.00256352	0.002533
0.00593194	0.00535592
0.002533	0.00299077
0.0024567	0.00238041
0.00831617	0.00545892
0.00284581	0.00262455
0.00407416	0.00282292
0.00251774	0.00247196
0.0065156	0.00354009
0.00256352	0.00248722
0.00643931	0.00399786
0.0115511	0.00337987
0.00404364	0.00280766
0.00579843	0.00451286
0.00271611	0.00276188
0.00602731	0.00329595
0.00292973	0.00271611
0.00639353	0.00407416
0.00285344	0.00262455
0.00308232	0.00308232
0.0027924	0.00280766
0.00657282	0.00387579
0.00308232	0.00247196
0.00697337	0.00463874
0.00739681	0.00460822
0.00909438	0.00476081
0.00550469	0.00431067
0.00259403	0.00251774
0.00300603	0.00267033
0.00245289	0.00236515
0.00756847	0.00495537
0.00694286	0.00321965
0.0028687	0.00271611
0.00273136	0.00260929
0.00283818	0.00263981
0.00317388	0.00289921
0.00273136	0.00273136
0.00289921	0.00265507
0.0145113	0.00546273
0.00288396	0.00274662
0.00259403	0.00251774
0.00299077	0.00271611
0.00801862	0.00439841
0.00518807	0.00349432
0.0031281	0.00297551
0.00627146	0.00467308
0.00262455	0.00257877
0.00257877	0.00251774
0.002533	0.00248722
0.00924697	0.00628672
0.00273136	0.00260929
0.00248722	0.00233463
0.00273136	0.00251774
0.00320439	0.0028687
0.00297551	0.00256352
0.00259022	0.00242618
0.00417334	0.002533
0.0107271	0.00486
0.00814069	0.00436408
0.0033875	0.00283818
0.00282292	0.00255589
0.00254826	0.00254826
0.00709545	0.00418097
0.002533	0.00260929
0.00302129	0.00234989
0.00309758	0.00268559
0.00296025	0.00259403
0.00267033	0.00239567
0.00259403	0.00257877
0.00285344	0.00276188
0.00274662	0.00270085
0.00721752	0.00563058
0.0030518	0.00274662
0.00297551	0.00288396
0.00448234	0.00326543
0.00422675	0.00341802
0.00673686	0.00517281
0.00298314	0.00251774
0.0044213	0.00311284
0.0042153	0.00250248
0.00263981	0.002533
0.00263981	0.00256352
0.00268559	0.00257877
0.00260929	0.00248722
0.00508125	0.00360113
0.00273136	0.0027924
0.00271611	0.00267033
0.00259403	0.002533
0.00276951	0.00241093
0.00267033	0.00282292
0.00256352	0.00239567
0.00263981	0.00260929
0.00285344	0.00248722
0.00608835	0.00516518
0.00291447	0.00263981
0.00311284	0.00273136
0.00262455	0.00231937
0.00839246	0.00680552
0.00292973	0.00277714
0.0121157	0.00678645
0.00489052	0.00508125
0.00285725	0.00241093
0.00273136	0.00276188
0.00427253	0.00367742
0.0037232	0.0027924
0.00288396	0.00259403
0.00292973	0.00263981
0.00302129	0.00320821
0.00259403	0.00248722
0.00530251	0.00282292
0.00477607	0.00462348
0.00674449	0.00485237
0.0047303	0.00276188
0.00280766	0.00273136
0.00819791	0.00648127
0.00271611	0.00239567
0.00270085	0.00260929
0.00297551	0.00297551
0.004654	0.00458152
0.00273136	0.00309758
0.00270085	0.00242618
0.00280003	0.00262455
0.00273136	0.00256352
0.00413519	0.0037232
0.00421149	0.00376898
0.00257877	0.00248722
0.00262837	0.00238041
0.00325017	0.00354009
0.00459297	0.006981
0.00763714	0.00949111
0.00321965	0.00328069
0.00311284	0.00342565
0.00366217	0.00297551
0.00248722	0.00241093
0.00574121	0.0028687
0.00411994	0.00285344
0.002533	0.0024567
0.00300603	0.00254826
0.00250248	0.00247196
0.00317388	0.00273136
0.00466926	0.00306706
0.00283818	0.00250248
0.00254826	0.002533
0.00251774	0.00250248
0.00459297	0.00325017
0.00538643	0.00315862
0.00248722	0.00244144
0.00547799	0.00401312
0.00793469	0.00421149
0.00910964	0.00411994
0.00442512	0.00332647
0.00740063	0.00447089
0.002533	0.00248722
0.00627909	0.00352483
0.00250248	0.00247196
0.00601205	0.00369268
0.00754559	0.00435264
0.00547036	0.00410468
0.00294499	0.00254826
0.00260929	0.00247196
0.00518807	0.00244144
0.00337224	0.00276188
0.00254826	0.002533
0.00354772	0.0028687
0.0030518	0.00256352
0.00259403	0.00247196
0.00658045	0.0039826
0.00672541	0.00352483
0.00537118	0.00369268
0.00320439	0.00251774
0.00347906	0.00262455
0.0147555	0.00701915
0.00389105	0.00306706
0.00492866	0.00383001
0.0103304	0.004654
0.00244144	0.00241093
0.00650034	0.00399786
0.00302129	0.00244144
0.00436408	0.00281147
0.00659571	0.00358587
0.00276188	0.00256352
0.00300603	0.00257877
0.00260929	0.00251774
0.004551	0.00276188
0.00251774	0.00251774
0.002533	0.0024567
0.00260929	0.00248722
0.00676356	0.00350958
0.00326543	0.00303655
0.0024567	0.00236515
0.0109407	0.00387579
0.00442512	0.00311284
0.00453193	0.00296025
0.0047303	0.00328069
0.0068246	0.0034638
0.00250248	0.00244144
0.00248722	0.00250248
0.00839246	0.00421149
0.00254826	0.00256352
0.00262455	0.00236515
0.00289921	0.00265507
0.00344854	0.00265507
0.0039826	0.00299077
0.00251774	0.00247196
0.00709545	0.00392157
0.00329595	0.00291447
0.00256352	0.00250248
0.00248722	0.00251774
0.00632486	0.00442512
0.00762951	0.00396735
0.00770962	0.00402838
0.00812924	0.00544747
0.0030518	0.002533
0.00851453	0.00567636
0.00366217	0.00277714
0.00457771	0.00355535
0.00563439	0.00411612
0.00325017	0.0027924
0.00248722	0.00247196
0.00802625	0.00358587
0.00355535	0.00276188
0.00248722	0.00248722
0.00926223	0.00297551
0.0024567	0.00241093
0.0024567	0.00244144
0.00616464	0.00411994
0.0027924	0.00248722
0.0028687	0.0024567
0.00282292	0.00257877
0.00706874	0.00350958
0.00434882	0.00318914
0.00247196	0.0024567
0.00315862	0.00277714
0.00248722	0.0024567
0.00787747	0.00485237
0.0120279	0.00341802
0.00441367	0.0027924
0.0027924	0.00247196
0.00268559	0.00247196
0.00251774	0.0024567
0.00282292	0.00250248
0.00752651	0.00517281
0.00724804	0.00373846
0.00395209	0.0033875
0.00257877	0.002533
0.00273136	0.00254826
0.00274662	0.00251774
0.00259403	0.00256352
0.00254826	0.00247196
0.00471504	0.00344854
0.00247196	0.00247196
0.00923171	0.00508125
0.00283818	0.00262455
0.00277714	0.00300603
0.0102998	0.0059205
0.0118753	0.00476081
0.00538643	0.00442512
0.00274662	0.00285344
0.00318914	0.00273136
0.00589761	0.00343328
0.00282292	0.00276188
0.00325017	0.00259403
0.00251774	0.00247196
0.00759899	0.0037995
0.00418097	0.00297551
0.00263981	0.00248722
0.0028687	0.0027924
0.00296025	0.00260929
0.00274662	0.00267033
0.00781262	0.00384527
0.00273136	0.00247196
0.00629435	0.00364691
0.00596628	0.00418097
0.0102731	0.00463874
0.00329595	0.00277714
0.00788891	0.00511177
0.00320439	0.00277714
0.00335317	0.00283818
0.00306706	0.00263981
0.00939574	0.00407416
0.00570687	0.00386053
0.00360113	0.00289921
0.00274662	0.00270085
0.00508125	0.00358587
0.00260929	0.00251774
0.00639353	0.0043183
0.00462348	0.00364691
0.00331121	0.00267033
0.0031281	0.00263981
0.00268559	0.00254826
0.00704967	0.00541695
0.00267033	0.00251774
0.00250248	0.00251774
0.00285344	0.00259403
0.00892653	0.0103456
0.002533	0.00251774
0.0027924	0.00256352
0.00265507	0.00250248
0.0107843	0.00537118
0.0043946	0.00326543
0.0061532	0.00357061
0.00708019	0.00363165
0.00861753	0.00456245
0.00550469	0.00381476
0.00329595	0.00274662
0.00303655	0.00242618
0.00291447	0.00277714
0.00764477	0.00471504
0.00713359	0.0038529
0.0028687	0.002533
0.00285344	0.00268559
0.0130922	0.00538643
0.00248722	0.00247196
0.00630198	0.00416953
0.00823987	0.00349432
0.002533	0.00247196
0.00366217	0.00241093
0.00292973	0.00270085
0.00674449	0.00410468
0.00263981	0.00268559
0.00247196	0.00250248
0.00256352	0.00248722
0.00779355	0.00529488
0.00251774	0.00247196
0.00263981	0.00267033
0.0030518	0.00249866
0.002533	0.002533
0.00952163	0.00553903
0.00270085	0.00257877
0.00978103	0.00454719
0.0140764	0.0135805
0.00256352	0.00259403
0.00270085	0.002533
0.00567636	0.00367742
0.00588998	0.00323491
0.00508125	0.00399786
0.00285344	0.00250248
0.002533	0.00254826
0.0028687	0.00283818
0.00292973	0.00325017
0.00671397	0.00517281
0.00263981	0.00260929
0.00436408	0.00401312
0.00329595	0.00300603
0.00408942	0.00332647
0.00315862	0.00270085
0.00334173	0.00270085
0.00248722	0.0024567
0.00740063	0.00521859
0.00265507	0.00265507
0.00795758	0.00389105
0.00288396	0.00265507
0.00257877	0.00260929
0.00340276	0.00269703
0.00260929	0.00250248
0.00553903	0.00323491
0.00935378	0.00538262
0.00257877	0.0024567
0.00321965	0.00322728
0.0052491	0.00332647
0.002533	0.002533
0.0061799	0.00445945
0.00283818	0.00260929
0.00502022	0.00415045
0.00453193	0.00326925
0.00404364	0.00335698
0.00769055	0.00476081
0.00717174	0.0053254
0.00585946	0.00425727
0.00262455	0.00248722
0.00474556	0.00308232
0.00257877	0.00254826
0.00257877	0.00265507
0.00527962	0.00440986
0.00263981	0.00247196
0.00349432	0.00300603
0.00719844	0.00424201
0.0052491	0.0039292
0.00627146	0.00369268
0.00584421	0.00428779
0.00425727	0.0030518
0.00962844	0.00233463
0.00916304	0.00511177
0.00277714	0.002533
0.00607309	0.00534066
0.00547799	0.00317388
0.00267033	0.00260929
0.00257877	0.00250248
0.00433356	0.00300603
0.00627146	0.00361639
0.00265507	0.002533
0.00296025	0.00289921
0.00251774	0.00251774
0.00270085	0.00256352
0.00548562	0.00433356
0.00746166	0.00567636
0.0122683	0.00818265
0.0024567	0.00238041
0.0031281	0.00267033
0.00254826	0.00251774
0.00521859	0.00407416
0.00257877	0.00250248
0.00639734	0.00299077
0.00277714	0.00262455
0.00265507	0.00251774
0.0024567	0.0024567
0.00283818	0.00277714
0.00322728	0.00276188
0.00352865	0.0027657
0.00834287	0.00674449
0.00775921	0.00725185
0.00521859	0.00328069
0.00393683	0.00340276
0.00290303	0.00250248
0.0113527	0.0037232
0.0062562	0.00578317
0.00331121	0.0027924
0.00265507	0.00263981
0.00282292	0.00256352
0.00260929	0.00260929
0.00274662	0.00267033
0.00289921	0.00350195
0.00250248	0.00248722
0.00337224	0.00291447
0.007187	0.00461204
0.00306706	0.00355535
0.0024567	0.00248722
0.00241093	0.00241093
0.00780499	0.00352483
0.00257877	0.00257877
0.00545129	0.00328069
0.00730526	0.00743496
0.00263981	0.00251774
0.00679026	0.00360113
0.00292973	0.00241093
0.00306706	0.00285344
0.00389105	0.0034638
0.00282292	0.00321965
0.00502022	0.00315862
0.00260929	0.00268559
0.00254826	0.00250248
0.00300603	0.0028687
0.00614939	0.002533
0.00282292	0.00256352
0.0131533	0.00849165
0.00300603	0.00262455
0.00486763	0.00408942
0.00300221	0.00267033
0.00280766	0.00265507
0.00254063	0.0024567
0.002533	0.00250248
0.00267033	0.00257877
0.00260929	0.002533
0.00268559	0.0025864
0.00271992	0.00251774
0.00265507	0.00271611
0.00321965	0.00321965
0.00314336	0.00306706
0.00363165	0.00352483
0.00231556	0.00230411
0.00273136	0.0025864
0.00250248	0.00248722
0.00343328	0.002533
0.00254826	0.002533
0.00695811	0.0031281
0.00248722	0.00247196
0.00300603	0.00257877
0.00620279	0.00323491
0.00259403	0.00248722
0.00242618	0.00242618
0.00706493	0.00292973
0.002533	0.0024567
0.00257877	0.00248722
0.00720226	0.00460441
0.00276188	0.00251774
0.00683604	0.00363165
0.00610742	0.00418097
0.00529488	0.00294499
0.00270085	0.0024567
0.002533	0.0024567
0.00251774	0.00247196
0.00775158	0.00369268
0.00247196	0.00244144
0.00505074	0.0030518
0.00563058	0.0034638
0.0034638	0.00277714
0.00349432	0.00294499
0.00736248	0.0047303
0.00543221	0.00271611
0.00256352	0.002533
0.00701915	0.00518807
0.00274662	0.00254826
0.002533	0.00241093
0.0108988	0.00302129
0.00659953	0.00356298
0.00776684	0.00294881
0.00260929	0.00244144
0.00538643	0.0040589
0.00517281	0.00415045
0.00254826	0.00248722
0.00433356	0.00296025
0.00646983	0.00325017
0.0100099	0.00683604
0.00469978	0.00299077
0.00756847	0.00514229
0.00248722	0.0024567
0.00247196	0.00244144
0.00515755	0.00349432
0.00250248	0.00244144
0.00704967	0.00315862
0.00517281	0.00329595
0.00601205	0.00396735
0.00314336	0.00262455
0.00309758	0.00250248
0.00254826	0.00247196
0.00383001	0.00262455
0.00433356	0.00285344
0.00285344	0.00260929
0.00274662	0.00270085
0.00456245	0.00303655
0.00251774	0.0024567
0.00935378	0.00306706
0.00588998	0.00367742
0.00250248	0.00244144
0.00257877	0.0024567
0.00250248	0.0024567
0.00782788	0.00543221
0.00251774	0.00247196
0.0167315	0.00492866
0.0134775	0.00280766
0.00931563	0.00277714
0.00671778	0.0054818
0.00782788	0.00402838
0.00263981	0.00247196
0.00415045	0.0028687
0.00833143	0.00538643
0.00836576	0.00425727
0.00250248	0.00248722
0.004551	0.00311284
0.00502022	0.00254826
0.0118334	0.00334173
0.00251774	0.002533
0.00249104	0.00251774
0.00727855	0.00410468
0.00418097	0.0031281
0.00605783	0.00344854
0.002533	0.00248722
0.00309758	0.00257877
0.00271611	0.00247196
0.0119135	0.00520333
0.00671397	0.00442512
0.00407416	0.0033875
0.0077821	0.00534066
0.00738537	0.00367742
0.00309758	0.00262455
0.00289158	0.00241093
0.0041352	0.00328069
0.00257877	0.00248722
0.0101587	0.00334173
0.00774777	0.00535592
0.0112001	0.00440986
0.00256352	0.00248722
0.00454719	0.00354009
0.00988785	0.00646983
0.00483711	0.00329595
0.00608835	0.00390631
0.00706493	0.00335698
0.00276188	0.002533
0.00254826	0.00251774
0.00381476	0.00294499
0.00383001	0.00282292
0.00283818	0.00262455
0.00872816	0.0043946
0.0027924	0.00254826
0.00257877	0.00250248
0.00753796	0.00404364
0.00839246	0.00480659
0.00251774	0.00250248
0.00645457	0.00268559
0.00251774	0.00247196
0.0102312	0.00489815
0.00292973	0.00289921
0.00672923	0.0043183
0.00274662	0.00257877
0.00355535	0.0028687
0.00514229	0.00366217
0.00457771	0.00335698
0.00251774	0.00247196
0.00642405	0.00570687
0.00276188	0.00251774
0.00570306	0.00489815
0.00784314	0.00422675
0.00321584	0.00263981
0.00321965	0.00270085
0.00739681	0.00415045
0.00949111	0.00363165
0.00277714	0.00260929
0.00271611	0.00276188
0.00968566	0.0047303
0.00656138	0.00549325
0.00263981	0.00254826
0.00276188	0.00244144
0.00250248	0.0024567
0.00568017	0.00390631
0.0108034	0.00337224
0.00291447	0.00257877
0.00733196	0.00345998
0.00262455	0.002533
0.00521859	0.00419623
0.00251774	0.00248722
0.0062562	0.00451667
0.00410468	0.00274662
0.00297551	0.00263981
0.00344854	0.00280766
0.00251774	0.00244144
0.00271611	0.00251774
0.00935378	0.00521096
0.00267033	0.00251774
0.00250248	0.00254826
0.00292973	0.00250248
0.00250248	0.0024567
0.00540169	0.00364691
0.00256352	0.002533
0.00544747	0.00448615
0.00254826	0.002533
0.00276188	0.00270085
0.0105058	0.00289921
0.00337224	0.00262455
0.00296025	0.00294499
0.00248722	0.0024567
0.00257877	0.00250248
0.00248722	0.00247196
0.0035172	0.00292973
0.00436408	0.0031281
0.00375372	0.00268559
0.00337224	0.00283818
0.00265507	0.00268559
0.00271611	0.00292973
0.00292973	0.00257877
0.00999466	0.00424201
0.00436408	0.00318914
0.00248722	0.00244144
0.00248722	0.00250248
0.00250248	0.00250248
0.00631724	0.00314336
0.00801099	0.00433356
0.00262455	0.002533
0.00267033	0.00260929
0.0030518	0.00265507
0.00299077	0.00270085
0.00511177	0.00332647
0.00278096	0.00268559
0.0027924	0.00277714
0.00282292	0.00291447
0.00248722	0.0024567
0.00317388	0.00259403
0.00257877	0.00254826
0.00865568	0.00349813
0.00315862	0.00300603
0.00296025	0.00270085
0.00296025	0.00241093
0.00788891	0.00376898
0.00248722	0.0024567
0.00265507	0.00273136
0.00669871	0.00393683
0.00270085	0.00260929
0.00271611	0.00257877
0.00267033	0.00257877
0.0065919	0.00430304
0.00314336	0.00262455
0.00505074	0.00274662
0.00304036	0.00289921
0.00262455	0.00248722
0.00355535	0.0028687
0.00265507	0.00250248
0.00965133	0.00549325
0.00358968	0.00277714
0.00274662	0.00257877
0.00268559	0.00259403
0.002533	0.00247196
0.00509651	0.00320439
0.00736629	0.00444038
0.009308	0.00428779
0.00373846	0.00285344
0.00248722	0.0024567
0.0117037	0.0037995
0.0027924	0.00277714
0.0031281	0.00277714
0.00326543	0.002533
0.00277714	0.00277714
0.00831617	0.00830472
0.00340276	0.0030518
0.00256352	0.00248722
0.00299077	0.00263981
0.00254826	0.00248722
0.00480659	0.00375372
0.00756847	0.00507744
0.00335698	0.00296025
0.00254826	0.00248722
0.00276188	0.00350958
0.00645075	0.0033875
0.00262455	0.00267033
0.00283818	0.00270085
0.00335698	0.00294499
0.00815595	0.00729381
0.00939956	0.00347906
0.00326543	0.0028687
0.0027924	0.00270085
0.00330358	0.00268559
0.00515755	0.00263981
0.00367742	0.00335698
0.00276188	0.00262455
0.00274662	0.00268559
0.00843824	0.00332647
0.00267033	0.00270085
0.00277714	0.00268559
0.00514229	0.00389105
0.00256352	0.00251774
0.00271611	0.00267033
0.00831617	0.00415045
0.00707256	0.00356298
0.00283818	0.00270085
0.00698863	0.00534066
0.00377661	0.00314336
0.00247196	0.00242618
0.00270085	0.00280766
0.00369268	0.00314336
0.00270085	0.00241093
0.00265507	0.00259403
0.00767529	0.00366217
0.00567636	0.00393683
0.00309758	0.00285344
0.00274662	0.00254826
0.00666819	0.00395209
0.00808728	0.00410468
0.00360113	0.00387579
0.00283818	0.00247196
0.00541695	0.00373846
0.00326543	0.00317388
0.00270085	0.00260929
0.00283818	0.00242618
0.00260929	0.00247196
0.00411994	0.00303655
0.00539406	0.00314336
0.00495155	0.00300603
0.00299077	0.00274281
0.00309758	0.00292973
0.00844587	0.00345235
0.00241093	0.00236515
0.00381094	0.00347524
0.00262837	0.00251774
0.00373083	0.00287251
0.00254826	0.0024567
0.00303273	0.00274662
0.00268559	0.00247196
0.00248722	0.00247196
0.00375372	0.00383001
0.00294881	0.00399786
0.00329595	0.00316625
0.00271611	0.00260929
0.00260929	0.00241093
0.00256352	0.00256352
0.00274662	0.00262455
0.00259403	0.002533

## Sheet: G146A
0.00463874	0.00340276	Fluorescence Intensity	Figure 8d
0.0110475	0.00369268
0.00306706	0.00321965	A: Protein in Nucleus
0.00552377	0.00375372	B: Protein in Cytoplasm
0.00466926	0.00357443
0.00573739	0.00415045
0.00802625	0.00370794
0.00570687	0.00350958
0.00465782	0.00328069
0.00444038	0.00366217
0.00390631	0.00323491
0.0043183	0.00325017
0.00503548	0.00386053
0.00686656	0.00343328
0.00387579	0.00321965
0.00726329	0.00403983
0.0087892	0.00370794
0.00842298	0.00332647
0.0101091	0.00672923
0.00576791	0.00383001
0.00474556	0.00355535
0.00375372	0.00329595
0.00462348	0.00344854
0.00756847	0.00320439
0.00381476	0.00344854
0.00468452	0.00321584
0.0251164	0.00809873
0.00671015	0.00369268
0.00598535	0.00416571
0.00326543	0.00433356
0.00552377	0.00357061
0.0027924	0.00337224
0.00593576	0.00337224
0.0058938	0.00334173
0.00875105	0.00366217
0.00637064	0.0033875
0.00656138	0.00328069
0.00400168	0.00428779
0.00387579	0.00306706
0.00660716	0.00373846
0.00344854	0.0032845
0.00318914	0.00321965
0.00507362	0.00370794
0.00846876	0.00396735
0.00468452	0.00320439
0.0065156	0.00378424
0.00633249	0.00495918
0.00576028	0.00364691
0.00686656	0.00361639
0.0100481	0.00334173
0.00963607	0.00387579
0.00329595	0.00314336
0.00527962	0.00339132
0.00289921	0.00341802
0.00884642	0.00363165
0.00511177	0.00317769
0.0087129	0.00363928
0.00748074	0.00433356
0.00908675	0.00419242
0.00634775	0.00369268
0.00367742	0.00349432
0.00593194	0.0031281
0.00733959	0.00377661
0.00428779	0.00350958
0.00572595	0.00349432
0.00392157	0.00314336
0.0045243	0.0033875
0.00907149	0.00366217
0.00361257	0.00357061
0.00466926	0.00317388
0.00365072	0.00353628
0.00300603	0.00305943
0.00546273	0.0031281
0.00706493	0.00413901
0.00326543	0.0030518
0.00387579	0.00331121
0.00334173	0.00308232
0.00366217	0.00332647
0.00318914	0.00315862
0.00404364	0.00328069
0.0144083	0.00386816
0.0078584	0.00356298
0.00479133	0.00376898
0.00263981	0.00325017
0.00801862	0.00340276
0.00285344	0.00326543
0.00447089	0.0030518
0.00254826	0.0034638
0.00437171	0.00343328
0.00283818	0.00294499
0.0033875	0.00362402
0.00812161	0.00361639
0.00614939	0.00334173
0.00389487	0.00328069
0.0108721	0.00512703
0.00387579	0.00325017
0.00421149	0.00369268
0.00294499	0.00296025
0.00801862	0.00428397
0.00828565	0.00361639
0.00917067	0.00347143
0.00566491	0.00389868
0.00500496	0.00320439
0.00428779	0.00303655
0.00672923	0.00363165
0.00949493	0.0033875
0.00340276	0.00308232
0.00654612	0.00472267
0.00512703	0.00297551
0.0063859	0.0040589
0.00296025	0.00306706
0.00511177	0.0033875
0.00695811	0.00366217
0.00341421	0.00390631
0.00643931	0.00421149
0.00486763	0.00387579
0.00271611	0.00321965
0.00325017	0.00299077
0.00456245	0.00354009
0.00569162	0.0034638
0.0028687	0.00311284
0.00447089	0.0031281
0.0043946	0.00434882
0.0041352	0.00317388
0.0053521	0.00331121
0.00495537	0.00328069
0.00311284	0.00298314
0.00277714	0.00291447
0.00690471	0.0034638
0.0031281	0.0034638
0.00489815	0.00326543
0.00361639	0.00354009
0.00904097	0.00851453
0.00854505	0.00400549
0.00251774	0.0029984
0.00834669	0.00352483
0.00424201	0.00363165
0.0087892	0.00340276
0.00447089	0.00334554
0.00323491	0.00296025
0.00430304	0.00394446
0.00849165	0.00328832
0.0082475	0.00355535
0.00550851	0.00430304
0.00756847	0.00350195
0.00567636	0.00320439
0.00428779	0.00340276
0.0052491	0.00344854
0.00460822	0.0037232
0.00889601	0.00334173
0.00340276	0.00331121
0.00554665	0.00331121
0.0129358	0.00366217
0.00433356	0.00340658
0.00320439	0.00329595
0.00363165	0.0030518
0.00297551	0.00346761
0.00648508	0.0036202
0.00347906	0.00292973
0.00361257	0.00319295
0.00648508	0.00515755
0.00556954	0.00321965
0.00683604	0.00358587
0.0041352	0.00320439
0.00552758	0.0033875
0.0030518	0.00294499
0.00491341	0.00350576
0.00808728	0.00364691
0.00302129	0.00291447
0.00331121	0.00302129
0.00735485	0.00345235
0.0041352	0.00306706
0.00411994	0.00317388
0.00660334	0.00485237
0.00566873	0.00314336
0.0109445	0.00337224
0.00621424	0.00367361
0.00482185	0.00332647
0.00495155	0.00366217
0.00411231	0.00311284
0.00481041	0.00325017
0.00341802	0.00302129
0.00288396	0.00291447
0.00622568	0.00321965
0.00428779	0.00303655
0.00289921	0.00302129
0.00483711	0.00309758
0.007393	0.00320439
0.00363165	0.00312428
0.00273136	0.00296025
0.00401312	0.00318914
0.00363165	0.00302129
0.00623331	0.00328832
0.00254826	0.00309758
0.00404364	0.00365835
0.00584421	0.00413138
0.00939574	0.00373846
0.0080415	0.00313573
0.00575265	0.00321965
0.00390631	0.00292973
0.00268559	0.00282292
0.00296025	0.00297551
0.00410468	0.00429541
0.00505074	0.00471504
0.00303655	0.0031281
0.00297551	0.00292973
0.00378042	0.00309758
0.00556954	0.00334173
0.00274662	0.00342184
0.00797284	0.00323873
0.00270085	0.00292973
0.00288396	0.00294499
0.0028687	0.00296025
0.00262455	0.00349432
0.00738918	0.00337224
0.00540169	0.00311284
0.00312428	0.00302129
0.00274662	0.00288396
0.00340658	0.00304417
0.00296025	0.00285344
0.00875105	0.00460822
0.00326543	0.00291447
0.00332647	0.00320821
0.00318914	0.00310521
0.00320439	0.00300603
0.00410468	0.00320058
0.00262455	0.00294499
0.0030518	0.00355535
0.00311284	0.00299077
0.00306706	0.00289921
0.00469978	0.00326162
0.00283818	0.00285344
0.00309758	0.00294499
0.00428016	0.00352483
0.00846113	0.00343328
0.00318914	0.00294499
0.00283818	0.00282292
0.00448615	0.00311284
0.00281529	0.00316625
0.00277714	0.00291447
0.00337224	0.00318914
0.00425727	0.00327306
0.00890364	0.0031281
0.00403983	0.00300603
0.00416571	0.00317388
0.00247196	0.00250248
0.0028687	0.00299077
0.00509651	0.00306706
0.00445563	0.00297551
0.00296025	0.00309758
0.00289921	0.00292592
0.00262455	0.00263981
0.00259403	0.00304036
0.00321965	0.00293355
0.00389868	0.00297551
0.00277714	0.00275807
0.00311284	0.00334936
0.00390631	0.00303655
0.00482185	0.00394064
0.00265507	0.00309758
0.00285344	0.0028687
0.00474556	0.00296025
0.00593576	0.00306325
0.00350195	0.00306706
0.00375753	0.00299077
0.00331121	0.00318914
0.00282292	0.00302129
0.00331121	0.00292973
0.00270085	0.00299077
0.00527581	0.00424201
0.00302892	0.00310521
0.00274662	0.0027924
0.00270085	0.00285344
0.0027924	0.00285344
0.0043946	0.00371557
0.0036202	0.00329595
0.00280766	0.00285725
0.0031281	0.00302129
0.00345998	0.00288396
0.0124819	0.00442893
0.00292973	0.00294499
0.00282292	0.00284962
0.00318914	0.00310903
0.00257877	0.00300984
0.00250248	0.00280766
0.00277714	0.00291447
0.00297551	0.00292973
0.00314336	0.00306706
0.00335317	0.00311284
0.00347524	0.00283818
0.0043183	0.00299077
0.00340276	0.0028687
0.00267033	0.00297551
0.00294499	0.00283818
0.0102731	0.00457771
0.00408942	0.00299077
0.00294499	0.00285344
0.00531014	0.00375372
0.0031281	0.00297932
0.0028687	0.00289921
0.00248722	0.00248722
0.0030518	0.00296788
0.00289921	0.0028687
0.00274662	0.00267033
0.00273136	0.00257877
0.00328069	0.00300603
0.00383764	0.00328069
0.00276188	0.00267033
0.0024567	0.00248722
0.00500496	0.00368887
0.0024567	0.00250248
0.00283818	0.0028687
0.0037232	0.00317388
0.00280766	0.00288396
0.00343328	0.00289158
0.00250248	0.002533
0.00399023	0.00324254
0.00311284	0.00285344
0.0028954	0.00290684
0.00247196	0.00254826
0.00302129	0.00296025
0.00300221	0.00408942
0.00360113	0.00335698
0.00265507	0.00256352
0.00244144	0.00244144
0.00250248	0.00251774
0.00247196	0.00248722
0.00352483	0.00291447
0.00256352	0.00257877
0.00242618	0.00244144
0.00265507	0.00283818
0.00500496	0.00374228
0.0031281	0.00273136
0.00280766	0.00292973
0.00248722	0.002533
0.0028687	0.00268177
0.00283818	0.00315099
0.00248722	0.00248722
0.00289921	0.00291447
0.00248722	0.00247196
0.00247196	0.00247196
0.00248722	0.00250248
0.0024567	0.0024567
0.002533	0.00256352
0.00250248	0.00251774
0.00247196	0.00248722
0.00248722	0.002533
0.00247196	0.00247196
0.0024567	0.00244144
0.00306706	0.00273136
0.0024567	0.00247196
0.00280766	0.00260929
0.00242618	0.00244144
0.00251774	0.00251774
0.00242618	0.0024567
0.00309758	0.00270466
0.0024567	0.00246433
0.00248722	0.00247196
0.00247196	0.00248722
0.00250248	0.00252537
0.00260929	0.00257877
0.00288396	0.00282292
0.00313191	0.00306706
0.00257877	0.00257877
0.00299077	0.00296025
0.00259403	0.00256352
0.00247196	0.00247196
0.00283818	0.0027924
0.00248722	0.00248722
0.0027924	0.00277714
0.00247196	0.00248722
0.00321965	0.00311284
0.00248722	0.00250248
0.00244144	0.00244907
0.00352483	0.00302892
0.00244144	0.0024567
0.0024567	0.00247196
0.002533	0.00256352
0.00267033	0.00268559
0.00291447	0.0028687
0.00254826	0.00254826
0.0024567	0.00248722
0.00277714	0.00262455
0.00254826	0.002533
0.00262455	0.00265507
0.00247196	0.00250248
0.00242618	0.0024567
0.00248722	0.00251774
0.00280766	0.00289921
0.00357824	0.00343328
0.00244144	0.00247196
0.00244144	0.00246433
0.0024567	0.0024567
0.00250248	0.00248722
0.00250248	0.00247196
0.00259403	0.002533
0.00242618	0.00242618
0.00254826	0.00257877
0.00347906	0.00327687
0.0034638	0.00325017
0.00262455	0.002533
0.00250248	0.00251774
0.00268559	0.00257877
0.00294881	0.00268559
0.00259403	0.00257877
0.00248722	0.00248722
0.00251774	0.00251774
0.00259403	0.00257877
0.00285344	0.00283818
0.00251774	0.00261692
0.00256352	0.002533
0.0024567	0.00247196
0.0027924	0.00283818
0.00248722	0.00251774
0.00250248	0.00254826
0.00251774	0.00248722
0.00265507	0.00251774
0.00251774	0.00251774
0.00256352	0.00273899
0.00250248	0.00250248
0.00242618	0.0024567
0.00280766	0.00283818
0.0028687	0.00285344
0.00248722	0.00247196
0.00257877	0.00254826
0.00247196	0.00247196
0.00257877	0.00254826
0.00273136	0.00274662
0.00271611	0.00268559
0.00250248	0.00250248
0.0028687	0.00268559
0.00294499	0.00267033
0.00263981	0.00262455
0.00260929	0.00257877
0.00250248	0.002533
0.00247196	0.00248722
0.0024567	0.0024567
0.00247196	0.00247196
0.00256352	0.002533
0.00248722	0.00251774
0.00250248	0.00251774
0.00250248	0.00251774
0.00270085	0.00267033
0.0024567	0.00244144
0.00263981	0.00270085
0.00262455	0.00263981
0.00244144	0.0024567
0.00257877	0.00259403
0.00256352	0.0025864
0.00260929	0.00264744
0.002533	0.00251774
0.00263981	0.00273136
0.00247196	0.00247196
0.00256352	0.00260929
0.00387579	0.00352483
0.0028687	0.00265507
0.00251774	0.00256352
0.00254826	0.00261692
0.00337224	0.00297551
0.00251774	0.00254826
0.002533	0.00259403
0.002533	0.00254826
0.00274662	0.00276188
0.00254826	0.00280385
0.002533	0.002533
0.00270085	0.00263981
0.00247196	0.00247196
0.00257877	0.00260929
0.00247196	0.00251774
0.00273136	0.00267033
0.00257877	0.00254826
0.00250248	0.00250248
0.00247196	0.0024567
0.00260166	0.00263981
0.002533	0.00254826
0.002636	0.00265507
0.00254826	0.00257877
0.00260929	0.00262455
0.0102083	0.00567636
0.00262455	0.00263981
0.002533	0.00254826
0.00250248	0.00251774
0.00267033	0.0027924
0.00267033	0.00282292
0.00262455	0.00262455
0.00270085	0.00267033
0.002533	0.00256352
0.00331884	0.00321965
0.00370031	0.00323491
0.00246815	0.00247196
0.00270085	0.00270085
0.00251774	0.00254826
0.00250248	0.00254826
0.00282292	0.00285344
0.00262455	0.00270466
0.00423056	0.0032578
0.00254826	0.00259403
0.00310521	0.00309758
0.0027924	0.00280385
0.00350958	0.00294499
0.00273136	0.00271611
0.00242618	0.00244144
0.00256352	0.00276188
0.0024567	0.00247578
0.00441749	0.00345998
0.00291447	0.00278096
0.00257877	0.00267414
0.00270085	0.00265507
0.00263981	0.00265507
0.002533	0.00256352
0.00254826	0.00254826
0.00257877	0.00265126
0.00320439	0.00311284
0.00254826	0.00256352
0.00254826	0.00254826
0.00247196	0.00250248
0.00265507	0.00267033
0.00265507	0.00265507
0.00260929	0.00260166
0.00250248	0.00251774
0.00263981	0.00267033
0.002533	0.00257115
0.00247196	0.00247196
0.00348669	0.00334173
0.00273136	0.00274662
0.00282292	0.00282292
0.0030251	0.00308232
0.00269322	0.00268559
0.00262455	0.00265507
0.00257877	0.00259403
0.00276188	0.00274662
0.00260929	0.00260929
0.00251774	0.00254826
0.00256352	0.00254826
0.00256352	0.00260166
0.00244144	0.0024567
0.00250248	0.00250248
0.00250248	0.00252537
0.00250248	0.00250248
0.00276188	0.00280003
0.00271611	0.00271611
0.00256352	0.00259403
0.00248722	0.00251011
0.00260929	0.00260929
0.00285344	0.00282673
0.00280766	0.00302129
0.0024567	0.0024567
0.00290303	0.00292973
0.0031281	0.00308232
0.00289158	0.00282292
0.00265507	0.0026894
0.00293355	0.0029221
0.00288396	0.00296025
0.00250248	0.00250248
0.00277333	0.00276188
0.00259403	0.00256352
0.00347524	0.00326925
0.00257115	0.0025597
0.00251011	0.00251011
0.00250248	0.00250248
0.00267796	0.00268559
0.00244144	0.00244144
0.00283436	0.00283436
0.00261311	0.00261311
0.0024567	0.0024567
0.00271611	0.00271611
0.00263981	0.00263981
0.00297551	0.00297551
0.00352483	0.00352483
0.00250248	0.00250248
0.00299077	0.00299077
0.00241093	0.00241093
0.00262455	0.00262455
0.00291447	0.00291447
0.00251774	0.00251774
0.00259403	0.00259403
0.00251774	0.00251774
0.00285344	0.00285344
0.00257877	0.00257877
0.00503548	0.00300603
0.00352483	0.0028687
0.00367742	0.00297551
0.0100977	0.00492866
0.0030518	0.00262455
0.00851453	0.00271611
0.00429541	0.00283818
0.00321965	0.00257877
0.00262455	0.00254826
0.0040589	0.00284199
0.00288396	0.00263981
0.00355917	0.00263981
0.00393683	0.00270085
0.00482185	0.00268559
0.00389105	0.00302129
0.00360113	0.00294499
0.00263981	0.00260929
0.00257877	0.00251774
0.00436408	0.00283818
0.0061799	0.00308232
0.00511177	0.00283818
0.0102083	0.00292973
0.00259403	0.00257877
0.00352483	0.00314336
0.00257877	0.002533
0.002533	0.002533
0.00277714	0.00263981
0.00260929	0.00256352
0.00681697	0.00294499
0.00263981	0.00257877
0.00608835	0.00306706
0.00802625	0.00341802
0.00779736	0.00369268
0.00575265	0.00283818
0.00270085	0.00256352
0.00300603	0.00271611
0.0100404	0.00299077
0.00546273	0.00268559
0.00389105	0.00292973
0.00378805	0.00268559
0.00364691	0.00302129
0.0067216	0.00263981
0.00428779	0.00288396
0.0039826	0.00265507
0.00299077	0.00263981
0.010544	0.00300603
0.00254826	0.00250248
0.00325017	0.00289921
0.00572213	0.00271611
0.00699626	0.00271611
0.00256352	0.00251774
0.00256352	0.00250248
0.0103151	0.00308232
0.00333028	0.00267033
0.00416571	0.00267033
0.00353246	0.00267033
0.00783932	0.00410468
0.0031281	0.00291447
0.00453956	0.00315862
0.00273136	0.00262455
0.00720226	0.00281529
0.00573739	0.00273136
0.00652323	0.00320439
0.00270085	0.00263981
0.00347906	0.00273136
0.00456245	0.0027924
0.00357061	0.00268559
0.0031281	0.00273136
0.00393683	0.00320439
0.00297551	0.0027924
0.00369268	0.00308232
0.00334173	0.00276188
0.00254826	0.002533
0.00349432	0.00262455
0.00328069	0.0027924
0.00376898	0.00303655
0.0028687	0.00265507
0.00494392	0.00265507
0.00265507	0.00256352
0.00363165	0.00263981
0.00326543	0.00262455
0.00308232	0.00265507
0.00457771	0.00300603
0.00399405	0.00274662
0.00357061	0.00292973
0.00331121	0.00271611
0.00396735	0.00274662
0.00462348	0.00297551
0.0059205	0.00274662
0.00254826	0.00251774
0.00350958	0.00274662
0.00250248	0.002533
0.00308232	0.00263981
0.0052491	0.00262455
0.00685893	0.00270085
0.00254826	0.00257877
0.00248722	0.00248722
0.00254826	0.00251774
0.00482567	0.00267033
0.00285344	0.00260929
0.002533	0.00250248
0.00489052	0.00262455
0.0037232	0.00260929
0.00628672	0.00289921
0.00294499	0.00270085
0.00491341	0.0027924
0.00256352	0.00254826
0.00344854	0.00271611
0.00250248	0.00251774
0.002533	0.00251774
0.0065919	0.00274662
0.0028687	0.00265507
0.00607691	0.0030518
0.002533	0.002533
0.00302129	0.00271611
0.00440986	0.00260929
0.00347143	0.00273136
0.00361639	0.00277714
0.00280766	0.00254826
0.00288396	0.00257877
0.00433356	0.00273136
0.00277714	0.00271611
0.00315862	0.00274662
0.00459297	0.00347906
0.00343328	0.00277714
0.00536355	0.00299077
0.00247196	0.00254826
0.00364691	0.00276188
0.002533	0.00262455
0.00387579	0.00256352
0.00405509	0.00308232
0.00418097	0.00273136
0.00624857	0.00271611
0.00467308	0.00283818
0.00273136	0.002533
0.00251774	0.002533
0.00303655	0.00259403
0.00291447	0.00260929
0.00390631	0.00323491
0.00271611	0.00259403
0.00701915	0.00360113
0.00561532	0.00273136
0.0031281	0.00263981
0.00317388	0.00300603
0.00483711	0.00308232
0.00308232	0.00297551
0.00549325	0.00297551
0.0030518	0.00273136
0.00876631	0.00270085
0.00244144	0.00254826
0.00468452	0.00265507
0.00354009	0.00274662
0.00484474	0.0028687
0.00340276	0.0027924
0.00386053	0.0027924
0.0037995	0.0027924
0.00250248	0.00251774
0.005066	0.00334173
0.00263981	0.00259403
0.00513466	0.00267033
0.00427253	0.00267033
0.00282292	0.00267033
0.00267033	0.00256352
0.00637827	0.00282292
0.00386053	0.00277714
0.00582513	0.00265507
0.00526436	0.00309758
0.00292973	0.00270085
0.00250248	0.00250248
0.00527199	0.00331121
0.00248722	0.00248722
0.00251774	0.00248722
0.00447852	0.00271611
0.00352483	0.00268559
0.00479133	0.00267033
0.0039826	0.00300603
0.00378424	0.00259403
0.00265507	0.00251774
0.00708019	0.00271611
0.00682078	0.00292973
0.00392157	0.00271611
0.00514229	0.00260929
0.00332647	0.00271611
0.0065919	0.00325017
0.00473411	0.00265507
0.00257877	0.00251774
0.00256352	0.002533
0.00421149	0.00285344
0.00509651	0.0027924
0.00294499	0.00259403
0.00367742	0.00299077
0.00511177	0.00277714
0.00289921	0.00262455
0.00614939	0.00325017
0.00365835	0.00270085
0.00370413	0.00268559
0.00337987	0.00260929
0.00387579	0.00268559
0.00288396	0.00285344
0.00334173	0.0028687
0.00329595	0.00317388
0.00482185	0.00268559
0.00373846	0.00256352
0.00320439	0.00268559
0.00360876	0.00270085
0.00696574	0.00284581
0.00325017	0.00259403
0.00370794	0.00260929
0.00666819	0.00267033
0.00505074	0.00311284
0.00250248	0.00251774
0.00256352	0.00254826
0.00285344	0.00257877
0.0028687	0.00262455
0.00251774	0.00250248
0.00427253	0.00283818
0.00291447	0.00259403
0.00445563	0.0027924
0.00341802	0.00282292
0.00250248	0.00251774
0.00556954	0.00263981
0.00251774	0.00256352
0.00402075	0.00280766
0.00366217	0.00271611
0.00248722	0.00248722
0.00363165	0.00314336
0.00318914	0.00276188
0.0063859	0.00265507
0.00280766	0.00263981
0.0043946	0.00306706
0.00321965	0.00289921
0.00355535	0.00282292
0.00433356	0.00265507
0.00251774	0.00251774
0.00970855	0.00297551
0.00451667	0.0027924
0.00393683	0.00276188
0.00438697	0.00368505
0.00248722	0.00250248
0.00367742	0.00263981
0.00251774	0.00248722
0.00254826	0.002533
0.00308232	0.00277714
0.00296025	0.0027924
0.002533	0.002533
0.00421149	0.00260929
0.00260929	0.00254826
0.00251774	0.00251774
0.00410468	0.00266651
0.00303655	0.00268559
0.00515755	0.00260929
0.00424201	0.00268559
0.00901045	0.0053254
0.00256352	0.00251774
0.002533	0.00250248
0.00268559	0.00254826
0.00453193	0.00268559
0.00289921	0.00274662
0.00440986	0.00267033
0.00254826	0.002533
0.00548943	0.00288396
0.00254826	0.002533
0.00361639	0.00267033
0.00254826	0.00254826
0.00384527	0.00276188
0.00317388	0.00273136
0.00502785	0.00355535
0.00470741	0.00343328
0.00300603	0.00268559
0.00433356	0.00265507
0.00289921	0.00265507
0.00747311	0.00361257
0.00247196	0.00250248
0.002533	0.00251774
0.00276188	0.00263981
0.00321965	0.00285344
0.00317388	0.00256352
0.00250248	0.00248722
0.00642023	0.00369268
0.0055848	0.0027924
0.00262455	0.00251774
0.00267033	0.00256352
0.00276188	0.00257877
0.00260929	0.00262455
0.00250248	0.00251774
0.00300603	0.00285344
0.00366217	0.00302129
0.0027924	0.00259403
0.00294118	0.00263981
0.0040589	0.00273899
0.00370031	0.00263981
0.00288014	0.00285344
0.00343328	0.00303273
0.00366217	0.00285344
0.00503929	0.00354009
0.00297551	0.00274662
0.0031281	0.00274662
0.00251774	0.00251392
0.00407416	0.00282292
0.0029984	0.00265507
0.00251774	0.00251774
0.00242618	0.00251774
0.00271611	0.00259403
0.00259403	0.00262455
0.00296025	0.00274662
0.00256352	0.002533
0.00254826	0.002533
0.00250248	0.00248722
0.00418097	0.00280766
0.00337224	0.00268559
0.00315862	0.00257877
0.00274662	0.00267033
0.00288396	0.002533
0.00321965	0.0027924
0.0024567	0.00248722
0.00288396	0.0027924
0.00853742	0.00274662
0.00248722	0.00248722
0.00247196	0.00250248
0.0027924	0.00251774
0.00277714	0.00248722
0.00535592	0.00282292
0.00280766	0.00262455
0.00254826	0.00250248
0.0030518	0.00267033
0.00271611	0.00259403
0.00254826	0.00254826
0.00876249	0.00318914
0.00254826	0.00250248
0.00259403	0.00288396
0.00458915	0.00294499
0.00247196	0.00248722
0.00303655	0.00289921
0.00248722	0.00248722
0.0024567	0.00247196
0.00257877	0.00248722
0.00251774	0.00254826
0.00311284	0.00257877
0.002533	0.00251774
0.00283818	0.00251774
0.00309758	0.00292973
0.00267033	0.00257877
0.00292973	0.00268559
0.00248722	0.00248722
0.00257877	0.002533
0.00289921	0.0027924
0.00306706	0.00325017
0.00244144	0.00248722
0.00306706	0.00282292
0.00401312	0.00262455
0.00256352	0.00256352
0.00292973	0.00274662
0.00294499	0.00276188
0.00250248	0.00248722
0.00248722	0.00248722
0.00256352	0.00248722
0.00247196	0.00248722
0.00366217	0.00269322
0.002533	0.00250248
0.00334173	0.00294499
0.00244144	0.0024567
0.00242618	0.00248722
0.00244144	0.00247196
0.00271611	0.00268559
0.00317388	0.0028687
0.00283818	0.00260929
0.00251774	0.00247196
0.00526436	0.00270085
0.00270085	0.00251774
0.00242618	0.00247196
0.00257877	0.00248722
0.00277714	0.00262455
0.0024567	0.00247196
0.00263981	0.00260929
0.00248722	0.00247196
0.00270085	0.00256352
0.00285344	0.00263981
0.00254444	0.00250248
0.00299077	0.00271611
0.00414664	0.00294499
0.00262455	0.00260166
0.00311284	0.00270085
0.00352483	0.00265507
0.00294499	0.00273136
0.00239567	0.00247196
0.0024567	0.00247196
0.00300603	0.00267033
0.00297551	0.00270085
0.00244144	0.00247196
0.00343328	0.00299077
0.00247196	0.00248722
0.00277714	0.00273136
0.00359731	0.00284962
0.00251774	0.00247196
0.00276188	0.00268559
0.0024567	0.0024567
0.00315862	0.00291447
0.00300603	0.00289921
0.00332647	0.00300603
0.0030518	0.00291447
0.00242618	0.00247196
0.00299077	0.00288396
0.00276188	0.00267033
0.00274662	0.00270085
0.00291447	0.00271611
0.00244144	0.00247196
0.00280766	0.00260929
0.00297551	0.0028687
0.00295262	0.00274662
0.00241093	0.0024567
0.00283818	0.00277714
0.00247196	0.00247196
0.00244144	0.00247196
0.00242618	0.0024567
0.00241093	0.00247196
0.00248722	0.00250248
0.002533	0.00262455
0.00247196	0.00248722
0.00260929	0.00257496
0.00244144	0.00248722
0.00268559	0.00251774
0.00296788	0.00280766
0.0051957	0.00289158
0.00254826	0.00254826
0.00242618	0.0024567
0.00274662	0.00265507
0.00328832	0.00294499
0.00257877	0.00251774
0.00265888	0.0026894
0.00321202	0.00282292
0.00254826	0.00247196
0.00239567	0.00238041
0.00227359	0.00227359
0.00268559	0.00251774
0.00242618	0.00243381
0.00265888	0.00262455
0.00254826	0.00248722
0.00236133	0.00236133
0.00292973	0.00292973
0.00637827	0.00303655
0.00909438	0.00402838
0.00455863	0.00325017
0.00347906	0.00292973
0.00434882	0.00306706
0.00602731	0.0031281
0.00480659	0.00291447
0.00416571	0.00314336
0.00362402	0.00303655
0.00335698	0.00309758
0.00384527	0.00306706
0.00378424	0.00317388
0.00384527	0.00302129
0.00497444	0.0040589
0.00350958	0.00325017
0.00538643	0.0031014
0.00337224	0.00292973
0.00430304	0.00297551
0.0077821	0.00334173
0.00433356	0.00317388
0.0041352	0.00335698
0.00479133	0.00323491
0.0107424	0.00352483
0.00463874	0.00288396
0.00350958	0.0027924
0.00340276	0.00292973
0.00349432	0.00308232
0.00670634	0.00308232
0.00540551	0.00349432
0.00370794	0.0031281
0.00767147	0.00328069
0.0043946	0.00314336
0.00635157	0.0031281
0.00343328	0.00288396
0.00329213	0.00300603
0.00285344	0.00280766
0.00534447	0.00294499
0.00491341	0.0028687
0.00700389	0.0031281
0.00646983	0.00416571
0.00354009	0.00299077
0.00425727	0.00296025
0.0047837	0.00358587
0.0040589	0.00289921
0.00523384	0.00292973
0.00613413	0.00289921
0.00708782	0.00318914
0.00381476	0.00288396
0.0047303	0.00328069
0.00453956	0.00288396
0.00358587	0.00282292
0.00343328	0.00285344
0.00796521	0.00311284
0.00375372	0.00283818
0.0031281	0.00307088
0.00311284	0.00273136
0.00448615	0.00321965
0.00335698	0.00283818
0.00422675	0.00303655
0.00373846	0.00283818
0.00425727	0.00283818
0.00593576	0.00321584
0.00477607	0.00288396
0.00326543	0.00291447
0.00640116	0.00335698
0.00370794	0.00306706
0.00900282	0.00331121
0.00339132	0.00381857
0.00466163	0.00329595
0.00290303	0.00274662
0.00442512	0.00299077
0.00572976	0.00350958
0.00521477	0.00288396
0.00337224	0.00296025
0.00575265	0.0034638
0.00317388	0.00283818
0.00358587	0.00308232
0.00497444	0.00354009
0.00376135	0.00377661
0.00321965	0.00280766
0.00564965	0.00289921
0.00300603	0.00327306
0.00318914	0.00290303
0.00357061	0.00296407
0.00447089	0.0028687
0.00442512	0.0031281
0.0079118	0.00409705
0.00515373	0.00329595
0.00393683	0.00308232
0.00303655	0.0027924
0.00779355	0.00314336
0.00418097	0.00332647
0.00779736	0.00308232
0.00268559	0.00296025
0.00357061	0.00299077
0.00517281	0.00291447
0.00326543	0.00276188
0.00267033	0.00276188
0.0056611	0.00294499
0.00601587	0.00291447
0.00330358	0.00334173
0.00291447	0.00288396
0.0089723	0.00306706
0.00520714	0.00342565
0.00505074	0.00296025
0.00473793	0.00283818
0.00488289	0.00283818
0.00378424	0.00299077
0.00401694	0.00285344
0.00423438	0.0030251
0.0136873	0.00722515
0.00740063	0.00297551
0.00503548	0.00291447
0.00610361	0.00303655
0.00276188	0.0031281
0.00578317	0.00317388
0.00442512	0.00297551
0.00531014	0.00289921
0.00677501	0.00291447
0.00590524	0.00288396
0.00296025	0.00280766
0.00283818	0.00280766
0.00340276	0.00283818
0.00549325	0.00285344
0.00631724	0.00331121
0.00347906	0.0027924
0.00534066	0.00299077
0.00570687	0.00296025
0.00738537	0.00384146
0.00323491	0.00282673
0.00386053	0.00282292
0.0033875	0.00271611
0.00497444	0.00332647
0.00273136	0.00280766
0.00265507	0.00308232
0.00327687	0.00296025
0.00530251	0.00300603
0.00415045	0.00309758
0.00280766	0.00273136
0.00517281	0.00294499
0.00585184	0.00292973
0.00658427	0.00288396
0.0053254	0.00309758
0.00685893	0.0030518
0.00306706	0.00294499
0.00283818	0.00289921
0.00267033	0.00268559
0.00530632	0.00297551
0.0041352	0.00285344
0.00328069	0.00271992
0.00315862	0.00277714
0.00598154	0.00311284
0.00367742	0.00277714
0.00361639	0.00288396
0.00497444	0.0028687
0.0105745	0.00793088
0.00492866	0.0030251
0.00488289	0.00292973
0.00349432	0.00291447
0.00485237	0.00280766
0.00720989	0.00308232
0.00267033	0.00342565
0.0047837	0.0030518
0.00541695	0.00297551
0.00623331	0.00298695
0.00491341	0.00273136
0.00274662	0.00270085
0.00531395	0.00292973
0.00525673	0.00294499
0.00280766	0.00274662
0.00576791	0.00292973
0.00378424	0.00285344
0.00302892	0.00287251
0.00551614	0.00323491
0.00311284	0.00291447
0.00442512	0.00292973
0.00387579	0.00296025
0.00267033	0.00274662
0.00320439	0.00308232
0.00277714	0.00274662
0.00381476	0.00289921
0.00265507	0.00271229
0.00282292	0.0027924
0.00389487	0.00291447
0.00494392	0.00318914
0.00273136	0.00268559
0.00394446	0.00285344
0.00390631	0.0028687
0.00491341	0.00292973
0.00544366	0.00291447
0.00388342	0.00326925
0.0028687	0.00282292
0.00669108	0.00329595
0.00546654	0.0028687
0.00306706	0.0027924
0.00532921	0.00283818
0.00404364	0.00291447
0.00259403	0.00283818
0.00442512	0.00283818
0.00320439	0.00271611
0.00280766	0.00283818
0.00325017	0.00276188
0.00288396	0.00276188
0.00300603	0.00270085
0.00270085	0.00276188
0.0027924	0.00285344
0.00390631	0.00277714
0.00315862	0.00273136
0.00280766	0.00280766
0.00274662	0.00271611
0.00367742	0.00282292
0.00270085	0.00268559
0.00283818	0.00619516
0.00296025	0.00270085
0.00254826	0.00490578
0.00248722	0.00259403
0.00274662	0.0027924
0.00276188	0.00274662
0.00369268	0.00273136
0.00270085	0.00271611
0.00488289	0.00285344
0.00277714	0.00274662
0.00296025	0.00271229
0.00256352	0.00256352
0.00273136	0.00267033
0.00262455	0.00268559
0.00265507	0.00267033
0.00331121	0.00268559
0.00248722	0.00259403
0.00394446	0.00285725
0.00270085	0.00270085
0.00306706	0.00270466
0.00262455	0.00266651
0.00250248	0.00247196
0.00262455	0.00267033
0.00257877	0.00265507
0.00340276	0.00291447
0.00263981	0.00267033
0.00282292	0.00277714
0.00263981	0.00270085
0.00267033	0.00265507
0.00262455	0.00254826
0.0031281	0.00271611
0.00271611	0.00267033
0.00289921	0.00280766
0.00340658	0.00271611
0.00334936	0.00296025
0.00277714	0.00270085
0.00257877	0.00254826
0.00256352	0.00257877
0.0028687	0.00273136
0.00276188	0.00273136
0.00250248	0.00251774
0.00273136	0.00268559
0.00263981	0.00263981
0.00492866	0.00291447
0.00262455	0.00267033
0.00273136	0.00271611
0.00321965	0.00281529
0.00262455	0.00265507
0.00263981	0.00259403
0.00241093	0.00239567
0.00244144	0.00244144
0.002533	0.00250248
0.00260929	0.00265507
0.00244144	0.00242618
0.00259403	0.00248722
0.00262455	0.00251774
0.00248722	0.00254826
0.00250248	0.00262455
0.00244144	0.00244144
0.00254826	0.002533
0.002533	0.00250248
0.00262455	0.00263981
0.0024567	0.0024567
0.00244144	0.00242618
0.00248722	0.00247959
0.00244144	0.0024567
0.00247196	0.0024567
0.00251774	0.00251774
0.00502022	0.0058938
0.00244144	0.00244144
0.00326543	0.00276188
0.00254826	0.00254826
0.002533	0.00256352
0.00244144	0.00242618
0.00247196	0.00247196
0.00262455	0.00265507
0.00278096	0.00273136
0.00254826	0.00256352
0.00248722	0.00248722
0.00256352	0.00250248
0.00254826	0.00251774
0.00247196	0.00251011
0.00242618	0.00242618
0.0024567	0.00247196
0.00254826	0.00257877
0.0024567	0.0024567
0.00254826	0.00270085
0.00254826	0.00254826
0.00262455	0.00251774
0.00262455	0.00260929
0.00248722	0.00248722
0.00273136	0.00273136
0.00260929	0.00263981
0.00247196	0.0024567
0.00271611	0.00270848
0.00248722	0.00248722
0.00244144	0.00244144
0.00262455	0.00263981
0.00250248	0.00248722
0.00242618	0.00242618
0.00248722	0.00250248
0.00280766	0.00271611
0.00262455	0.00263981
0.00292973	0.00277714
0.00257877	0.00263981
0.0024567	0.00244144
0.00251774	0.00251774
0.00241093	0.00241093
0.00250248	0.00248722
0.00263981	0.00257877
0.00408942	0.00307851
0.00256352	0.002533
0.00256352	0.00250248
0.00248722	0.00244144
0.00271611	0.00257877
0.00244144	0.00244144
0.00256352	0.00263981
0.00241093	0.00242618
0.00260929	0.00254826
0.00242618	0.00242618
0.00259403	0.00256352
0.00261311	0.00263981
0.00242618	0.0024567
0.00236515	0.00238041
0.00251774	0.00250248
0.002533	0.00254826
0.00250248	0.00254063
0.00247196	0.00259022
0.00244144	0.00244144
0.00250248	0.00251774
0.00250248	0.00250248
0.00247196	0.00247959
0.00273136	0.00262455
0.00254826	0.00254826
0.002533	0.00248722
0.00254826	0.00256352
0.00247196	0.00248722
0.00247196	0.0024567
0.00274662	0.00257877
0.002533	0.002533
0.00259403	0.00254826
0.00248722	0.0024567
0.00260929	0.00259403
0.00238041	0.00241093
0.00241093	0.00239567
0.00262455	0.00254826
0.00250248	0.00250248
0.00247196	0.00247959
0.00257877	0.00254826
0.00259403	0.00248722
0.00259403	0.00260929
0.00254826	0.002533
0.00242618	0.00242618
0.00302129	0.00289921
0.00251774	0.00251774
0.00260929	0.00260929
0.00262455	0.00257115
0.00256352	0.00257877
0.00254826	0.00254826
0.002533	0.00254826
0.002533	0.002533
0.00257877	0.00255589
0.00244144	0.0024567
0.00251774	0.00248722
0.00328069	0.00307851
0.00248722	0.00248722
0.0024567	0.00247196
0.00262455	0.00265507
0.00256352	0.00259403
0.0025597	0.0025864
0.00280003	0.00277714
0.00301747	0.00295644
0.002533	0.00251774
0.00261692	0.00280385
0.00263981	0.00265507
0.00265507	0.00264744
0.00276188	0.00275425
0.00265507	0.00265507
0.00249104	0.00249104
0.00260929	0.00260929
0.00262455	0.00262455
